# Supplementary material for: N6-methyladenosine (m6A) modification in inflammation: a bibliometric analysis and literature review
Source: PeerJ. 2024 Dec 13;12:e18645. doi: 10.7717/peerj.18645 (PMC11648684; doi:10.7717/peerj.18645)
Supplement: Supplemental Information 6 [file peerj-12-18645-s006.xlsx]

## Sheet: savedrecs
Publication Type	Author Full Names	Article Title	Source Title	Language	Document Type	Author Keywords	Keywords Plus	Abstract	Addresses	Affiliations	Reprint Addresses	Email Addresses	Cited Reference Count	Times Cited, WoS Core	Times Cited, All Databases	Publisher	Publisher City	Journal Abbreviation	Publication Date	Publication Year	Volume	DOI	DOI Link	WoS Categories	Web of Science Index	Pubmed Id	Web of Science Record
J	Klotz, Karl-Norbert; Falgner, Nico; Kachler, Sonja; Lambertucci, Catia; Vittori, Sauro; Volpini, Rosaria; Cristalli, Gloria	[3H]HEMADO -: a novel tritiated agonist selective for the human adenosine A3 receptor	EUROPEAN JOURNAL OF PHARMACOLOGY	English	Article	adenosine; adenosine A(3) receptor; agonist; radioligand	ANTAGONIST RADIOLIGAND; 2-ALKYNYL DERIVATIVES; EXPRESSION; ADENOSINE-5-N-ETHYLURONAMIDE; PHARMACOLOGY; POTENT; TARGET	Adenosine A(3) receptors are promising drug targets for a number of conditions like inflammatory diseases including asthma, ischemic injury or certain types of cancer. Consequently, intense efforts are dedicated to the development of selective A(3) agonists and antagonists. The only tritiated agonist that is available for radioligand binding is the nonselective [H-3]5'-N-ethylcarboxamidoadenosine…	Univ Wurzburg, Inst Pharmakol & Toxikol, D-97078 Wurzburg, Germany; Univ Camerino, Dipartimento Sci Chim, I-62032 Camerino, Italy	University of Wurzburg; University of Camerino	Klotz, KN (corresponding author), Univ Wurzburg, Inst Pharmakol & Toxikol, Versbacher Str 9, D-97078 Wurzburg, Germany.	klotz@toxi.uni-wuerzburg.de	28	61	63	ELSEVIER	AMSTERDAM	EUR J PHARMACOL	FEB 5	2007	556	10.1016/j.ejphar.2006.10.048	http://dx.doi.org/10.1016/j.ejphar.2006.10.048	Pharmacology & Pharmacy	Science Citation Index Expanded (SCI-EXPANDED)	17126322	View Full Record in Web of Science
J	Nie, Kai; Yi, Jun; Yang, Yuanyuan; Deng, Minzi; Yang, Yan; Wang, Tianyu; Chen, Xuejie; Zhang, Zhaoyu; Wang, Xiaoyan	A Broad m6A Modification Landscape in Inflammatory Bowel Disease	FRONTIERS IN CELL AND DEVELOPMENTAL BIOLOGY	English	Article	N6-methyladenosine; inflammatory bowel diseases; RNA modifications; epigenetics; biologics response	MESSENGER-RNA; M(6)A; VARIANT; N-6-METHYLADENOSINE; VISUALIZATION; ASSOCIATION; IMMUNITY; COLITIS; CANCER; LOCI	Background and Aims: N6-Methyladenosine (m6A) is the most common post-transcriptional modification on eukaryotic mRNA, affecting the mRNA's fate. The role of m6A regulation in inflammatory bowel disease is unclear. Here, we investigated the m6A landscape in inflammatory bowel diseases (IBD).Methods: Eleven human IBD microarray datasets were recruited from the Gene Expression Omnibus database and …	[Nie, Kai; Yang, Yuanyuan; Deng, Minzi; Yang, Yan; Wang, Tianyu; Chen, Xuejie; Wang, Xiaoyan] Cent South Univ, Xiangya Hosp 3, Dept Gastroenterol, Changsha, Peoples R China; [Nie, Kai; Yang, Yuanyuan; Deng, Minzi; Zhang, Zhaoyu; Wang, Xiaoyan] Cent South Univ, Canc Res Inst, Hunan Key Lab Nonresolving Inflammat & Canc, Changsha, Peoples R China; [Yi, Jun] Cent South Univ, Xiangya Hosp, Dept Gastr…	Central South University; Central South University; Central South University; Central South University	Wang, XY (corresponding author), Cent South Univ, Xiangya Hosp 3, Dept Gastroenterol, Changsha, Peoples R China.;Zhang, ZY; Wang, XY (corresponding author), Cent South Univ, Canc Res Inst, Hunan Key Lab Nonresolving Inflammat & Canc, Changsha, Peoples R China.;Zhang, ZY (corresponding author), Cent South Univ, Canc Res Inst, Changsha, Peoples R China.	2511996036@qq.com; wxy220011@163.com	77	27	28	FRONTIERS MEDIA SA	LAUSANNE	FRONT CELL DEV BIOL	JAN 19	2022	9	10.3389/fcell.2021.782636	http://dx.doi.org/10.3389/fcell.2021.782636	Cell Biology; Developmental Biology	Science Citation Index Expanded (SCI-EXPANDED)	35127705	View Full Record in Web of Science
J	Wu, Zhuoxuan; Lin, Weimin; Yuan, Quan; Lyu, Mingyue	A genome-wide association analysis: m6A-SNP related to the onset of oral ulcers	FRONTIERS IN IMMUNOLOGY	English	Article	GWAS; m6A; oral ulcers; CCRL2; pathogenesis	RECURRENT APHTHOUS STOMATITIS; MUCOSAL LESIONS; CCRL2; CHEMERIN; EXPRESSION; RECEPTORS; DATABASE; MOTIFS; IMPACT	Oral ulcers are one of the most common inflammatory diseases on oral mucosa that have obvious impacts on patients. Studies have shown that N6-methyladenosine (m6A) RNA transcription modification may be involved in the development of various inflammatory responses, and whether the pathogenesis of oral ulcers is related to m6A is unclear. This study aims to identify how m6A-related single nucleotid…	[Wu, Zhuoxuan; Lin, Weimin; Yuan, Quan; Lyu, Mingyue] Sichuan Univ, West China Sch Stomatol, State Key Lab Oral Dis, Chengdu, Peoples R China; [Wu, Zhuoxuan; Lin, Weimin; Yuan, Quan; Lyu, Mingyue] Sichuan Univ, Natl Clin Res Ctr Oral Dis, West China Sch Stomatol, Chengdu, Peoples R China; [Lin, Weimin; Yuan, Quan; Lyu, Mingyue] Sichuan Univ, West China Hosp Stomatol, Dept Oral Implantol, State Ke…	Sichuan University; Sichuan University; Sichuan University; Sichuan University	Lyu, MY (corresponding author), Sichuan Univ, West China Sch Stomatol, State Key Lab Oral Dis, Chengdu, Peoples R China.;Lyu, MY (corresponding author), Sichuan Univ, Natl Clin Res Ctr Oral Dis, West China Sch Stomatol, Chengdu, Peoples R China.;Lyu, MY (corresponding author), Sichuan Univ, West China Hosp Stomatol, Dept Oral Implantol, State Key Lab Oral Dis, Chengdu, Peoples R China.;Lyu, MY (c…	lvmingyue9292@163.com	55	2	4	FRONTIERS MEDIA SA	LAUSANNE	FRONT IMMUNOL	JUL 25	2022	13	10.3389/fimmu.2022.931408	http://dx.doi.org/10.3389/fimmu.2022.931408	Immunology	Science Citation Index Expanded (SCI-EXPANDED)	35958581	View Full Record in Web of Science
J	Wang, Yafen; Han, Shaoqing; Ran, Ruoxi; Li, Anling; Liu, Huanyu; Liu, Mingjun; Duan, Yongwei; Zhang, Xiong; Zhao, Zhigang; Song, Shihui; Weng, Xiaocheng; Liu, Song-Mei; Zhou, Xiang	A longitudinal sampling study of transcriptomic and epigenetic profiles in patients with thrombocytopenia syndrome	NATURE COMMUNICATIONS	English	Article		DIFFERENTIAL EXPRESSION ANALYSIS; SEVERE FEVER; RNA; N6-METHYLADENOSINE	Severe fever with thrombocytopenia syndrome (SFTS) is a novel tick-borne infectious disease caused by a new type of SFTS virus (SFTSV). Here, a longitudinal sampling study is conducted to explore the differences in transcript levels after SFTSV infection, and to characterize the transcriptomic and epigenetic profiles of hospitalized patients. The results reveal significant changes in the mRNA exp…	[Wang, Yafen; Han, Shaoqing; Zhang, Xiong; Weng, Xiaocheng; Zhou, Xiang] Wuhan Univ, Coll Chem & Mol Sci, Wuhan, Peoples R China; [Ran, Ruoxi; Li, Anling; Liu, Mingjun; Duan, Yongwei; Liu, Song-Mei] Wuhan Univ, Zhongnan Hosp, Dept Clin Lab, Ctr Gene Diag, Wuhan, Peoples R China; [Ran, Ruoxi; Li, Anling; Liu, Mingjun; Duan, Yongwei; Liu, Song-Mei] Wuhan Univ, Zhongnan Hosp, Program Clin Lab Med, W…	Wuhan University; Wuhan University; Wuhan University; Wuhan University; Wuhan University; Wuhan University	Weng, XC; Zhou, X (corresponding author), Wuhan Univ, Coll Chem & Mol Sci, Wuhan, Peoples R China.;Liu, SM (corresponding author), Wuhan Univ, Zhongnan Hosp, Dept Clin Lab, Ctr Gene Diag, Wuhan, Peoples R China.;Liu, SM (corresponding author), Wuhan Univ, Zhongnan Hosp, Program Clin Lab Med, Wuhan, Peoples R China.	xcweng@whu.edu.cn; smliu@whu.edu.cn; xzhou@whu.edu.cn	63	9	11	NATURE PORTFOLIO	BERLIN	NAT COMMUN	SEP 24	2021	12	10.1038/s41467-021-25804-z	http://dx.doi.org/10.1038/s41467-021-25804-z	Multidisciplinary Sciences	Science Citation Index Expanded (SCI-EXPANDED)	34561445	View Full Record in Web of Science
J	Lu, Thomas X.; Zheng, Zhong; Zhang, Linda; Sun, Hui-Lung; Bissonnette, Marc; Huang, Haochu; He, Chuan	A New Model of Spontaneous Colitis in Mice Induced by Deletion of an RNA m6A Methyltransferase Component METTL14 in T Cells	CELLULAR AND MOLECULAR GASTROENTEROLOGY AND HEPATOLOGY	English	Article	Inflammatory Bowel Disease; RNA m(6)A Methylation; Mouse Colitis Model; Regulatory T Cells	FECAL MICROBIOTA TRANSPLANTATION; GENE-EXPRESSION; ULCERATIVE-COLITIS	BACKGROUND AND AIMS: Mouse models of colitis have been used to study the pathogenesis of inflammatory bowel disease (IBD) and for pre-clinical development of therapeutic agents. Various epigenetic pathways have been shown to play important regulatory roles in IBD. Reversible N-6-methyladenosine (m(6)A) methylation represents a new layer of post-transcriptional gene regulation that affects a varie…	[Lu, Thomas X.; Bissonnette, Marc] Univ Chicago Med, Sect Gastroenterol Hepatol & Nutr, Chicago, IL USA; [Zheng, Zhong; Zhang, Linda; Sun, Hui-Lung; He, Chuan] Univ Chicago, Dept Chem, 929 East 57th St,GCIS RM E319B, Chicago, IL 60637 USA; [Zheng, Zhong; Zhang, Linda; Sun, Hui-Lung; He, Chuan] Univ Chicago, Dept Biochem & Mol Biol, Chicago, IL 60637 USA; [Huang, Haochu] Genentech Inc, San Francis…	University of Chicago; University of Chicago; Roche Holding; Genentech; Howard Hughes Medical Institute	He, C (corresponding author), Univ Chicago, Dept Chem, 929 East 57th St,GCIS RM E319B, Chicago, IL 60637 USA.	chuanhe@uchicago.edu	40	83	92	ELSEVIER INC	SAN DIEGO	CELL MOL GASTROENTER		2020	10	10.1016/j.jcmgh.2020.07.001	http://dx.doi.org/10.1016/j.jcmgh.2020.07.001	Gastroenterology & Hepatology	Science Citation Index Expanded (SCI-EXPANDED)	32634481	View Full Record in Web of Science
J	Castellanos-Rubio, Ainara; Santin, Izortze; Olazagoitia-Garmendia, Ane; Romero-Garmendia, Irati; Jauregi-Miguel, Amaia; Legarda, Maria; Ramon Bilbao, Jose	A novel RT-QPCR-based assay for the relative quantification of residue specific m6A RNA methylation	SCIENTIFIC REPORTS	English	Article		SINGLE-NUCLEOTIDE-RESOLUTION; MESSENGER-RNA; DNA-POLYMERASE; M(6)A; N-6-METHYLADENOSINE	N6-methyladenosine (m6A) is the most common and abundant RNA modification. Recent studies have shown its importance in the regulation of several biological processes, including the immune response, and different approaches have been developed in order to map and quantify m6A marks. However, site specific detection of m6A methylation has been technically challenging, and existing protocols are lon…	[Castellanos-Rubio, Ainara; Olazagoitia-Garmendia, Ane; Romero-Garmendia, Irati; Jauregi-Miguel, Amaia; Ramon Bilbao, Jose] Univ Basque Country UPV EHU, Biocruces Bizkaia Hlth Res Inst, Dept Genet Phys Anthropol & Anim Physiol, Leioa, Spain; [Castellanos-Rubio, Ainara] Ikerbasque, Basque Fdn Sci, Bilbao, Spain; [Santin, Izortze] Univ Basque Country UPV EHU, Endocrinol & Diabet Res Grp, Dept Bioch…	University of Basque Country; Basque Foundation for Science; University of Basque Country; Hospital Universitario Cruces; University of Basque Country	Castellanos-Rubio, A; Bilbao, JR (corresponding author), Univ Basque Country UPV EHU, Biocruces Bizkaia Hlth Res Inst, Dept Genet Phys Anthropol & Anim Physiol, Leioa, Spain.;Castellanos-Rubio, A (corresponding author), Ikerbasque, Basque Fdn Sci, Bilbao, Spain.;Castellanos-Rubio, A; Bilbao, JR (corresponding author), Spanish Biomed Res Ctr Diabet & Associated Metab, Madrid, Spain.	ainara.castellanos@ehu.eus; joseramon.bilbao@ehu.eus	23	36	37	NATURE PORTFOLIO	BERLIN	SCI REP-UK	MAR 12	2019	9	10.1038/s41598-019-40018-6	http://dx.doi.org/10.1038/s41598-019-40018-6	Multidisciplinary Sciences	Science Citation Index Expanded (SCI-EXPANDED)	30862814	View Full Record in Web of Science
J	Zhang, Caiyan; Fu, Jinrong; Zhou, Yufeng	A Review in Research Progress Concerning m6A Methylation and Immunoregulation	FRONTIERS IN IMMUNOLOGY	English	Review	N6-methyladenosine; binding proteins; mechanisms; immunoregulation; cellular functions	MESSENGER-RNA METHYLATION; INDUCED INFLAMMATORY RESPONSE; SINGLE-NUCLEOTIDE-RESOLUTION; N-6-METHYLADENOSINE M(6)A; NUCLEAR-RNA; I INTERFERON; N6-METHYLADENOSINE; REVEALS; TRANSLATION; SEQUENCES	Over 100 types of cellular RNA modifications have been identified in both coding and a variety of non-coding RNAs. N6-methyladenosine (m6A) is the most prevalent and abundant post-transcriptional RNA modification on eukaryote mRNA, and its biological functions are mediated by special binding proteins (i.e., methyltransferases, demethylases, and effectors) that recognize this modification. The pre…	[Zhang, Caiyan; Fu, Jinrong; Zhou, Yufeng] Fudan Univ, Childrens Hosp, Shanghai, Peoples R China; [Zhang, Caiyan; Fu, Jinrong; Zhou, Yufeng] Fudan Univ, Inst Biomed Sci, Shanghai, Peoples R China; [Zhou, Yufeng] Fudan Univ, NHC Key Lab Neonatal Dis, Shanghai, Peoples R China	Fudan University; Fudan University; Fudan University	Zhou, YF (corresponding author), Fudan Univ, Childrens Hosp, Shanghai, Peoples R China.;Zhou, YF (corresponding author), Fudan Univ, Inst Biomed Sci, Shanghai, Peoples R China.;Zhou, YF (corresponding author), Fudan Univ, NHC Key Lab Neonatal Dis, Shanghai, Peoples R China.	yfzhou1@fudan.edu.cn	82	202	217	FRONTIERS MEDIA SA	LAUSANNE	FRONT IMMUNOL	APR 26	2019	10	10.3389/fimmu.2019.00922	http://dx.doi.org/10.3389/fimmu.2019.00922	Immunology	Science Citation Index Expanded (SCI-EXPANDED)	31080453	View Full Record in Web of Science
J	Liang, Xiaowei; Gao, Hongwei; Xiao, Jian; Han, Shan; He, Jia; Yuan, Renyikun; Yang, Shilin; Yao, Chun	Abrine, an IDO1 inhibitor, suppresses the immune escape and enhances the immunotherapy of anti-PD-1 antibody in hepatocellular carcinoma	FRONTIERS IN IMMUNOLOGY	English	Article	IDO1; Abrine; CD47; PD-L1; m(6)A RNA modification; immune escape; hepatocellular carcinoma	CELL	BackgroundIndoleamine-2,3-dioxygenase 1 (IDO1) is responsible for tumor immune escape by regulating T cell-associated immune responses and promoting the activation of immunosuppressive. Given the vital role of IDO1 in immune response, further investigation on the regulation of IDO1 in tumors is needed. MethodsHerein, we used ELISA kit to detect the interferon-gamma (IFN-gamma), Tryptophan (Trp), …	[Liang, Xiaowei; Gao, Hongwei; Han, Shan; He, Jia; Yuan, Renyikun; Yang, Shilin] Guangxi Univ Chinese Med, Coll Pharm, Nanning, Peoples R China; [Liang, Xiaowei; Gao, Hongwei; Xiao, Jian; Han, Shan; He, Jia; Yuan, Renyikun; Yang, Shilin; Yao, Chun] Engn Res Ctr Minist Educ Innovat Drugs Tradit Chin, Nanning, Peoples R China	Guangxi University of Chinese Medicine	Yuan, RYK (corresponding author), Guangxi Univ Chinese Med, Coll Pharm, Nanning, Peoples R China.;Yuan, RYK; Yao, C (corresponding author), Engn Res Ctr Minist Educ Innovat Drugs Tradit Chin, Nanning, Peoples R China.	yryk0808@163.com; yaochun111111@163.com	54	11	13	FRONTIERS MEDIA SA	LAUSANNE	FRONT IMMUNOL	MAY 24	2023	14	10.3389/fimmu.2023.1185985	http://dx.doi.org/10.3389/fimmu.2023.1185985	Immunology	Science Citation Index Expanded (SCI-EXPANDED)	37334368	View Full Record in Web of Science
J	Gao, Jie; Li, Yan; Liu, Zijin; Wang, Dong; Zhang, Huawu	Acetaminophen changes the RNA m6A levels and m6A-related proteins expression in IL-1β-treated chondrocyte cells	BMC MOLECULAR AND CELL BIOLOGY	English	Article	Acetaminophen; Chondrocyte cell; Interleukin-1 beta; RNA N-6-methyladenosine modification; ALKBH5; Inflammatory factors; Extracellular matrix		Background: Acetaminophen is commonly recommended for the early analgesia of osteoarthritis. However, the molecular mechanism by which it acts remains unknown. The aim of this study is to investigate the effect of acetaminophen on inflammation and extracellular matrix degradation in human chondrocytes, and the possible molecular mechanisms involved in its effect. Methods: The normal chondrocyte c…	[Gao, Jie; Li, Yan; Liu, Zijin; Wang, Dong; Zhang, Huawu] Shandong Second Prov Gen Hosp, Dept Joint Surg, 4 Duanxing West Rd, Jinan 250022, Shandong, Peoples R China		Zhang, HW (corresponding author), Shandong Second Prov Gen Hosp, Dept Joint Surg, 4 Duanxing West Rd, Jinan 250022, Shandong, Peoples R China.	zhanghuawu100@126.com	32	2	2	BMC	LONDON	BMC MOL CELL BIOL	OCT 27	2022	23	10.1186/s12860-022-00444-3	http://dx.doi.org/10.1186/s12860-022-00444-3	Cell Biology	Science Citation Index Expanded (SCI-EXPANDED)	36303109	View Full Record in Web of Science
J	Nie, Kechao; Zheng, Zhihua; Li, Jing; Chang, Yonglong; Deng, Zhitong; Huang, Wei; Li, Xiushen	AGAP2-AS1 promotes the assembly of m6A methyltransferases and activation of the IL6/STAT3 pathway by binding with WTAP in the carcinogenesis of gastric cancer	FASEB JOURNAL	English	Article	AGAP2-AS1; gastric cancer; inflammation; N6-methyladenosine; STAT3	PROGRESSION; RNA	Owing to the lack of biomarkers for early diagnosis, gastric cancer (GC) is often associated with a poor prognosis. Thus, there is an urgent need to identify early molecular targets in GC. Dysregulated long noncoding RNAs (lncRNAs) have been evaluated by integrated bioinformatics analysis; and we investigate their specific role and potential mechanism via N6-methyladenosine (m6A) methylation modi…	[Nie, Kechao; Li, Jing; Chang, Yonglong; Huang, Wei] Cent South Univ, Xiangya Hosp 2, Dept Integrated Tradit Chinese & Western Med, Changsha 410001, Peoples R China; [Zheng, Zhihua] Shenzhen Tradit Chinese Med Hosp, Dept Gastroenterol, Shenzhen, Peoples R China; [Deng, Zhitong] Guangzhou Univ Chinese Med, Sci & Technol Innovat Ctr, Guangzhou, Peoples R China; [Huang, Wei] Cent South Univ, Xiangya…	Central South University; Shenzhen Traditional Chinese Medicine Hospital; Guangzhou University of Chinese Medicine; Central South University; Shenzhen University	Huang, W (corresponding author), Cent South Univ, Xiangya Hosp 2, Dept Integrated Tradit Chinese & Western Med, Changsha 410001, Peoples R China.;Li, XS (corresponding author), Shenzhen Univ, Hlth Sci Ctr, Sch Biomed Engn, Guangdong Key Lab Biomed Measurements & Ultrasound, Shenzhen 518060, Peoples R China.	huangweidavid@csu.edu.cn; lixiushenzplby@163.com	49	1	1	WILEY	HOBOKEN	FASEB J	DEC	2023	37	10.1096/fj.202301249R	http://dx.doi.org/10.1096/fj.202301249R	Biochemistry & Molecular Biology; Biology; Cell Biology	Science Citation Index Expanded (SCI-EXPANDED)	37983949	View Full Record in Web of Science
J	Sun, Ru-Xu; Zhu, Hong-Jing; Zhang, Ye -Ran; Wang, Jia-Nan; Wang, Ying; Cao, Qiu-Chen; Ji, Jiang-Dong; Jiang, Chao; Yuan, Song -Tao; Chen, Xue; Liu, Qing-Huai	ALKBH5 causes retinal pigment epithelium anomalies and choroidal neovascularization in age-related macular degeneration via the AKT/mTOR pathway	CELL REPORTS	English	Article		DEMETHYLASE; VEGF; METHYLTRANSFERASE; INFLAMMATION; RECOGNITION; METHYLATION; PROGRESSION; MECHANISMS; HYPOXIA	Retinal pigment epithelium (RPE) dysfunction and choroidal neovascularization (CNV) are predominant fea-tures of age-related macular degeneration (AMD), with an unclear mechanism. Herein, we show that RNA demethylase a-ketoglutarate-dependent dioxygenase alkB homolog 5 (ALKBH5) is up-regulated in AMD. In RPE cells, ALKBH5 overexpression associates with depolarization, oxidative stress, disturbed …	[Sun, Ru-Xu; Zhu, Hong-Jing; Zhang, Ye -Ran; Wang, Jia-Nan; Wang, Ying; Cao, Qiu-Chen; Ji, Jiang-Dong; Jiang, Chao; Yuan, Song -Tao; Chen, Xue; Liu, Qing-Huai] Nanjing Med Univ, Affiliated Hosp 1, Dept Ophthalmol, Nanjing 210029, Peoples R China	Nanjing Medical University	Yuan, ST; Chen, X; Liu, QH (corresponding author), Nanjing Med Univ, Affiliated Hosp 1, Dept Ophthalmol, Nanjing 210029, Peoples R China.	yuansongtao@vip.sina.com; drcx1990@vip.163.com; liuqh@njmu.edu.cn	64	7	8	CELL PRESS	CAMBRIDGE	CELL REP	JUL 25	2023	42	10.1016/j.celrep.2023.112779	http://dx.doi.org/10.1016/j.celrep.2023.112779	Cell Biology	Science Citation Index Expanded (SCI-EXPANDED)	37436898	View Full Record in Web of Science
J	Wang, Peng; Zhang, Min; Wang, Zhiwei; Wu, Qi; Shi, Feng; Yuan, Shun	ALKBH5 Exacerbates Aortic Dissection by Promoting Inflammatory Response and Apoptosis of Aortic Smooth Muscle Cells via Regulating lnc-TMPO-AS1/EZH2/IRAK4 Signals in an m6A Modification Manner	OXIDATIVE MEDICINE AND CELLULAR LONGEVITY	English	Article		MESSENGER-RNA; CANCER PROGRESSION; ANEURYSMS; METHYLATION; METTL3; GENES	Recently, mounting evidence indicates that N6-methyladenosine (m6A) modification functions as a pivotal posttranscriptional modification that regulates noncoding RNA biogenesis to influence the progression of multiple diseases. However, whether m6A modification is involved in aortic dissection (AD) development has never been reported. Meanwhile, numerous studies have shown that AngII-induced infl…	[Wang, Peng; Zhang, Min; Wang, Zhiwei; Wu, Qi; Shi, Feng; Yuan, Shun] Wuhan Univ, Dept Cardiovasc Surg, Renmin Hosp, 238 Jiefang Rd, Wuhan 430000, Hubei, Peoples R China; [Wang, Peng; Zhang, Min; Wang, Zhiwei; Wu, Qi; Shi, Feng; Yuan, Shun] Wuhan Univ, Cardiovasc Surg Lab, Renmin Hosp, 9 Zhangzhidong Rd, Wuhan 430000, Hubei, Peoples R China; [Wang, Peng; Wu, Qi; Shi, Feng; Yuan, Shun] Wuhan Univ,…	Wuhan University; Wuhan University; Wuhan University	Wang, ZW (corresponding author), Wuhan Univ, Dept Cardiovasc Surg, Renmin Hosp, 238 Jiefang Rd, Wuhan 430000, Hubei, Peoples R China.;Wang, ZW (corresponding author), Wuhan Univ, Cardiovasc Surg Lab, Renmin Hosp, 9 Zhangzhidong Rd, Wuhan 430000, Hubei, Peoples R China.	wangzhiwei@whu.edu.cn	26	1	1	HINDAWI LTD	LONDON	OXID MED CELL LONGEV	MAR 18	2021	2021	10.1155/2021/5513966	http://dx.doi.org/10.1155/2021/5513966	Cell Biology	Science Citation Index Expanded (SCI-EXPANDED)		View Full Record in Web of Science
J	Xu, Haojun; Lin, Changjie; Wang, Chao; Zhao, Tianrui; Yang, Jinghan; Zhang, Junhao; Hu, Yanjun; Qi, Xue; Chen, Xi; Chen, Yingyu; Chen, Jianguo; Guo, Aizhen; Hu, Changmin	ALKBH5 Stabilized N6-Methyladenosine-Modified LOC4191 to Suppress E. coli-Induced Apoptosis	CELLS	English	Article	N-6-methyladenosine; long non-coding RNA; apoptosis; bovine mammary epithelial cells; E. coli	NF-KAPPA-B; ESCHERICHIA-COLI; CELL-CYCLE; INFLAMMATION; METHYLATION; MASTITIS; LINKING; MAPK	E. coli is a ubiquitous pathogen that is responsible for over one million fatalities worldwide on an annual basis. In animals, E. coli can cause a variety of diseases, including mastitis in dairy cattle, which represents a potential public health hazard. However, the pathophysiology of E. coli remains unclear. We found that E. coli could induce global upregulation of m(6)A methylation and cause s…	[Xu, Haojun; Lin, Changjie; Zhao, Tianrui; Yang, Jinghan; Zhang, Junhao; Hu, Yanjun; Qi, Xue; Hu, Changmin] Huazhong Agr Univ, Dept Clin Vet Med, Coll Vet Med, Wuhan 430070, Peoples R China; [Xu, Haojun; Lin, Changjie; Wang, Chao; Zhao, Tianrui; Yang, Jinghan; Zhang, Junhao; Hu, Yanjun; Qi, Xue; Chen, Xi; Chen, Yingyu; Chen, Jianguo; Guo, Aizhen] Huazhong Agr Univ, State Key Lab Agr Microbiol, Wu…	Huazhong Agricultural University; Huazhong Agricultural University; Huazhong Agricultural University; Huazhong Agricultural University	Hu, CM (corresponding author), Huazhong Agr Univ, Dept Clin Vet Med, Coll Vet Med, Wuhan 430070, Peoples R China.	xuhaojun@webmail.hzau.edu.cn; 1875155626@outlook.com; wangchao666@webmail.hzau.edu.cn; ztroct@163.com; yangjinghan@link.cuhk.edu.hk; zhangjunhao@webmail.hzau.edu.cn; 13618639606@163.com; 15776560206@163.com; chenxi@mail.hzau.edu.cn; chenyingyu@mail.hzau.edu.cn; chenjg@mail.hzau.edu.cn; aizhen@mail.hzau.edu.cn; hcm@mail.hzau.edu.cn	88	0	0	MDPI	BASEL	CELLS-BASEL	NOV	2023	12	10.3390/cells12222604	http://dx.doi.org/10.3390/cells12222604	Cell Biology	Science Citation Index Expanded (SCI-EXPANDED)	37998339	View Full Record in Web of Science
J	Chen, Tingting; Zhu, Wenhui; Wang, Congyao; Dong, Xia; Yu, Fenfen; Su, Yihua; Huang, Jingwen; Huo, Lijun; Wan, Pengxia	ALKBH5-Mediated m6A Modification of A20 Regulates Microglia Polarization in Diabetic Retinopathy	FRONTIERS IN IMMUNOLOGY	English	Article	diabetic retinopathy; microglia polarization; A20; m(6)A modification; ALKBH5	GLOBAL PREVALENCE; RETINAL MICROGLIA; N-6-METHYLADENOSINE; NEUROINFLAMMATION; METHYLATION; MODULATION; TNFAIP3	BackgroundTo investigate the role of microglia polarization in the pathogenesis of diabetic retinopathy, and study the mechanism of ALKBH5-mediated m(6)A modification of A20 of retinal microglia polarization. MethodsDiabetics rats were constructed and the M1/M2 polarization of retinal microglia was determined using immunofluorescence, flow cytometry, and quantitative real-time PCR (qRT-PCR). Gluc…	[Chen, Tingting; Zhu, Wenhui; Wang, Congyao; Dong, Xia; Yu, Fenfen; Su, Yihua; Huang, Jingwen; Huo, Lijun; Wan, Pengxia] Sun Yat Sen Univ, Affiliated Hosp 1, Dept Ophthalmol, Guangzhou, Peoples R China	Sun Yat Sen University	Huo, LJ; Wan, PX (corresponding author), Sun Yat Sen Univ, Affiliated Hosp 1, Dept Ophthalmol, Guangzhou, Peoples R China.	huolijun@mail.sysu.edu.cn; huolijun@mail.sysu.edu.cn	43	28	29	FRONTIERS MEDIA SA	LAUSANNE	FRONT IMMUNOL	MAR 1	2022	13	10.3389/fimmu.2022.813979	http://dx.doi.org/10.3389/fimmu.2022.813979	Immunology	Science Citation Index Expanded (SCI-EXPANDED)	35300330	View Full Record in Web of Science
J	Chen, Genwen; Zhao, Qianqian; Yuan, Baoying; Wang, Biao; Zhang, Yang; Li, Zongjuan; Du, Shisuo; Zeng, Zhaochong	ALKBH5-Modified HMGB1-STING Activation Contributes to Radiation Induced Liver Disease via Innate Immune Response	INTERNATIONAL JOURNAL OF RADIATION ONCOLOGY BIOLOGY PHYSICS	English	Article		STEREOTACTIC BODY RADIOTHERAPY; CYCLIC GMP-AMP; HEPATOCELLULAR-CARCINOMA; RNA; DNA; METHYLATION; HMGB1; PATHWAY	Purpose: Radiation therapy, which is vital for the treatment of primary liver cancer, comes with unavoidable liver injury, which limits its implementation. N6-methyladenosine (m6A) methylation is involved in many molecular functions. However, its role in radiation-induced liver diseases (RILD) remains unknown. Herein, we investigate the role of m6A methylation in RILD. Methods and Materials: Meth…	[Chen, Genwen; Zhao, Qianqian; Yuan, Baoying; Wang, Biao; Zhang, Yang; Li, Zongjuan; Du, Shisuo; Zeng, Zhaochong] Fudan Univ, Zhongshan Hosp, Dept Radiat Oncol, Shanghai, Peoples R China	Fudan University	Zeng, ZC (corresponding author), Fudan Univ, Zhongshan Hosp, Dept Radiat Oncol, Shanghai, Peoples R China.	zeng.zhaochong@zs-hospital.sh.cn	52	30	36	ELSEVIER SCIENCE INC	NEW YORK	INT J RADIAT ONCOL	OCT 1	2021	111	10.1016/j.ijrobp.2021.05.115	http://dx.doi.org/10.1016/j.ijrobp.2021.05.115	Oncology; Radiology, Nuclear Medicine & Medical Imaging	Science Citation Index Expanded (SCI-EXPANDED)	34044094	View Full Record in Web of Science
J	Yi, Dazhuang; Wang, Qunhui; Zhao, Yuhao; Song, Yu; You, Hong; Wang, Jian; Liu, Renjie; Shi, Zhongqiang; Chen, Xuan; Luo, Qi	Alteration of N6 -Methyladenosine mRNA Methylation in a Rat Model of Cerebral Ischemia-Reperfusion Injury	FRONTIERS IN NEUROSCIENCE	English	Article	cerebral ischemia reperfusion injury; MCAO; R; N-6-methyladenosine; FTO; key genes	NEURONS	Aim This study was conducted in order to reveal the alterations in the N-6-methyladenosine (m6A) modification profile of cerebral ischemia-reperfusion injury model rats. Materials and Methods Rats were used to establish the middle cerebral artery occlusion and reperfusion (MCAO/R) model. MeRIP-seq and RNA-seq were performed to identify differences in m6A methylation and gene expression. The expre…	[Yi, Dazhuang; Wang, Qunhui; Zhao, Yuhao; You, Hong; Wang, Jian; Liu, Renjie; Shi, Zhongqiang; Chen, Xuan; Luo, Qi] First Hosp Jilin Univ, Dept Neurosurg, Changchun, Peoples R China; [Song, Yu] Tongji Univ, Sch Med, Shanghai Peoples Hosp 10, Dept Neurosurg, Shanghai, Peoples R China	Jilin University; Tongji University	Chen, X; Luo, Q (corresponding author), First Hosp Jilin Univ, Dept Neurosurg, Changchun, Peoples R China.	83823095@qq.com; Liluoqi@163.com	53	40	42	FRONTIERS MEDIA SA	LAUSANNE	FRONT NEUROSCI-SWITZ	MAR 16	2021	15	10.3389/fnins.2021.605654	http://dx.doi.org/10.3389/fnins.2021.605654	Neurosciences	Science Citation Index Expanded (SCI-EXPANDED)	33796004	View Full Record in Web of Science
J	Liu, Tao; Zhuang, Xing Xing; Qin, Xiu Juan; Wei, Liang Bing; Gao, Jia Rong	Alteration of N6-methyladenosine epitranscriptome profile in lipopolysaccharide-induced mouse mesangial cells	NAUNYN-SCHMIEDEBERGS ARCHIVES OF PHARMACOLOGY	English	Article	m6A methylation; m6A-seq; RNA-seq; Chronic glomerulonephritics; MMC cells	RNA-METHYLATION; MECHANISMS; N-6-METHYLADENOSINE; DIFFERENTIATION; TRANSLATION; APOPTOSIS	N6-Methyladenosine (m6A) is the most prevalent internal modification of messenger RNA (mRNA) in eukaryotes. The underlying molecular mechanisms of m6A modification in chronic glomerulonephritis (CGN) remain unexplored. Here, we performed methylated RNA immunoprecipitation sequencing (MeRIP-seq) and RNA sequencing (RNA-seq) analyses to assess the alterations of epitranscriptome-wide m6A profile in…	[Liu, Tao; Qin, Xiu Juan; Wei, Liang Bing; Gao, Jia Rong] Anhui Univ Chinese Med, Dept Pharm, Affiliated Hosp 1, Hefei 230012, Anhui, Peoples R China; [Liu, Tao; Zhuang, Xing Xing] Anhui Univ Chinese Med, Coll Pharm, Hefei 230011, Anhui, Peoples R China; [Zhuang, Xing Xing] Anhui Med Univ, Dept Pharm, Chaohu Hosp, Chaohu 238000, Anhui, Peoples R China; [Gao, Jia Rong] Anhui Prov Key Lab Chinese M…	Anhui University of Chinese Medicine; Anhui University of Chinese Medicine; Anhui Medical University	Gao, JR (corresponding author), Anhui Univ Chinese Med, Dept Pharm, Affiliated Hosp 1, Hefei 230012, Anhui, Peoples R China.;Gao, JR (corresponding author), Anhui Prov Key Lab Chinese Med Formula, Hefei 230031, Anhui, Peoples R China.	2020205219007@stu.ahtcm.edu.cn	54	9	9	SPRINGER	NEW YORK	N-S ARCH PHARMACOL	APR	2022	395	10.1007/s00210-022-02208-4	http://dx.doi.org/10.1007/s00210-022-02208-4	Pharmacology & Pharmacy	Science Citation Index Expanded (SCI-EXPANDED)	35119478	View Full Record in Web of Science
J	De Man, JG; Seerden, TC; De Winter, BY; Van Marck, EA; Herman, AG; Pelckmans, PA	Alteration of the purinergic modulation of enteric neurotransmission in the mouse ileum during chronic intestinal inflammation	BRITISH JOURNAL OF PHARMACOLOGY	English	Article	adenosine; ATP; cholinergic neurotransmission; enteric nervous system; inflammation; presynaptic inhibition; purinergic receptor	GUINEA-PIG ILEUM; RAT MAST-CELLS; GRANULOMATOUS INFLAMMATION; ACETYLCHOLINE-RELEASE; SCHISTOSOMA-MANSONI; ADENOSINE RECEPTORS; PRESYNAPTIC A(1)-RECEPTORS; ADENINE-NUCLEOTIDES; NERVOUS-SYSTEM; INHIBITION	1 The effect of chronic intestinal inflammation on the purinergic modulation of cholinergic neurotransmission was studied in the mouse ileum. Chronic intestinal inflammation was induced by infection of mice with the parasite Schistosoma mansoni during 16 weeks. 2 S. mansoni infection induced a chronic inflammatory response in the small intestine, which was characterised by intestinal granuloma fo…	Univ Instelling Antwerp, Fac Med, Div Gastroenterol, B-2610 Wilrijk, Belgium; Univ Instelling Antwerp, Fac Med, Div Pathol, B-2610 Wilrijk, Belgium; Univ Instelling Antwerp, Fac Med, Div Pharmacol, B-2610 Wilrijk, Belgium	University of Antwerp; University of Antwerp; University of Antwerp	De Man, JG (corresponding author), Univ Instelling Antwerp, Fac Med, Div Gastroenterol, Univ Pl 1, B-2610 Wilrijk, Belgium.		47	51	57	NATURE PUBLISHING GROUP	LONDON	BRIT J PHARMACOL	MAY	2003	139	10.1038/sj.bjp.0705218	http://dx.doi.org/10.1038/sj.bjp.0705218	Pharmacology & Pharmacy	Science Citation Index Expanded (SCI-EXPANDED)	12746236	View Full Record in Web of Science
J	Chen, Sylvia; Tan, Wei Zhi; Sutiman, Natalia; Lim, Cindy; Lee, Sze Sing; Leong, Wai Fook; Tjai, Madeline; Wang, Chunyan; Kong, Chris San Choon; Chuah, Sai Wei; Schwender, Brian John; Chan, Webber; Shim, Hang Hock; Lim, Wee Chian; Khor, Chiea Chuen; Ling, Khoon Lin; Chowbay, Balram	An intronic FTO variant rs16952570 confers protection against thiopurine-induced myelotoxicities in multiethnic Asian IBD patients	PHARMACOGENOMICS JOURNAL	English	Article		INFLAMMATORY-BOWEL-DISEASE; METHYLTRANSFERASE GENOTYPE; JAPANESE PATIENTS; NUDT15; ASSOCIATION; N6-METHYLADENOSINE; 6-MERCAPTOPURINE; PHARMACOGENOMICS; POLYMORPHISMS; AZATHIOPRINE	Thiopurines are used in the treatment of inflammatory bowel disease (IBD) but remain clinically challenging to manage due to wide interpatient variability in clinical outcomes and adverse events. Apart from genetic variants in thiopurine S-methyltransferase (TPMT) and nudix hydrolase 15 (NUDT15) genes, polymorphisms in FTO alpha-ketoglutarate dependent dioxygenase (FTO) were found predictive of t…	[Chen, Sylvia; Tan, Wei Zhi; Lee, Sze Sing; Chowbay, Balram] Natl Canc Ctr, Clin Pharmacol Lab, Singapore, Singapore; [Sutiman, Natalia; Leong, Wai Fook; Tjai, Madeline; Wang, Chunyan; Chowbay, Balram] SingHlth, Clin Pharmacol, Singapore, Singapore; [Lim, Cindy] Natl Canc Ctr, Biostat Unit, Clin Trials & Epidemiol Sci, Singapore, Singapore; [Kong, Chris San Choon; Chuah, Sai Wei; Schwender, Brian…	National Cancer Centre Singapore (NCCS); National Cancer Centre Singapore (NCCS); Singapore General Hospital; Tan Tock Seng Hospital; Singapore National Eye Center; National University of Singapore; National University of Singapore; Agency for Science Technology & Research (A*STAR); A*STAR - Genome Institute of Singapore (GIS); National University of Singapore; National Cancer Centre Singapore (N…	Chowbay, B (corresponding author), Natl Canc Ctr, Clin Pharmacol Lab, Singapore, Singapore.;Chowbay, B (corresponding author), SingHlth, Clin Pharmacol, Singapore, Singapore.;Chowbay, B (corresponding author), Duke NUS Med Sch, Ctr Clinician Scientist Dev, Singapore, Singapore.;Chowbay, B (corresponding author), Natl Canc Ctr, Humphrey Oei Inst Canc Res, Div Cellular & Mol Res, 11 Hosp Dr, Singap…	ctebal@nccs.com.sg	31	11	11	NATURE PUBLISHING GROUP	LONDON	PHARMACOGENOMICS J	JUN	2020	20	10.1038/s41397-019-0126-9	http://dx.doi.org/10.1038/s41397-019-0126-9	Genetics & Heredity; Pharmacology & Pharmacy	Science Citation Index Expanded (SCI-EXPANDED)	31813937	View Full Record in Web of Science
J	Qian, Weiwei; Cao, Yu	An overview of the effects and mechanisms of m6 A methylation on innate immune cells in sepsis	FRONTIERS IN IMMUNOLOGY	English	Article	sepsis; m(6)A methylation; immune cells; inflammation; oxidative stress		IntroductionSepsis is a severe clinical syndrome caused by dysregulated systemic inflammatory responses to infection. Methylation modification, as a crucial mechanism of RNA functional modification, can manipulate the immunophenotype and functional activity of immune cells to participate in sepsis progression. This study aims to explore the mechanism of N6-methyladenosine (m6A) methylation modifi…	[Qian, Weiwei] Sichuan Univ, Shangjinnanfu Hosp, West China Hosp, Emergency Dept, Chengdu, Sichuan, Peoples R China; [Cao, Yu] Sichuan Univ, West China Hosp, Emergency Dept, Chengdu, Sichuan, Peoples R China	Sichuan University; Sichuan University	Cao, Y (corresponding author), Sichuan Univ, West China Hosp, Emergency Dept, Chengdu, Sichuan, Peoples R China.	yuyuer@126.com	55	3	4	FRONTIERS MEDIA SA	LAUSANNE	FRONT IMMUNOL	NOV 24	2022	13	10.3389/fimmu.2022.1041990	http://dx.doi.org/10.3389/fimmu.2022.1041990	Immunology	Science Citation Index Expanded (SCI-EXPANDED)	36505499	View Full Record in Web of Science
J	Dong, Menglu; Shen, Wenzhuang; Yang, Guang; Yang, Zhifang; Li, Xingrui	Analysis of m6A Methylation Modification Patterns and Tumor Immune Microenvironment in Breast Cancer	FRONTIERS IN CELL AND DEVELOPMENTAL BIOLOGY	English	Article	M6A; tumor microenvironment; breast cancer; immunotherapy; mutation burden	EXPRESSION; BLOCKADE; READERS; WRITERS; CELLS	Increasing evidence indicates that the abnormal expression of N6-methyladenosine (m6A) modification is closely related to the epigenetic regulation of immune response in breast cancer (BC). However, the potential roles of m6A modification in the tumor microenvironment (TME) of BC remain unclear. For addressing this issue, we comprehensively analyzed the m6A modification patterns in 983 samples an…	[Dong, Menglu; Shen, Wenzhuang; Yang, Zhifang; Li, Xingrui] Huazhong Univ Sci & Technol, Tongji Med Coll, Tongji Hosp, Dept Thyroid & Breast Surg, Wuhan, Peoples R China; [Yang, Guang] Huazhong Univ Sci & Technol, Tongji Hosp, Dept Thorac Surg, Tongji Med Coll, Wuhan, Peoples R China	Huazhong University of Science & Technology; Huazhong University of Science & Technology	Yang, ZF; Li, XR (corresponding author), Huazhong Univ Sci & Technol, Tongji Med Coll, Tongji Hosp, Dept Thyroid & Breast Surg, Wuhan, Peoples R China.	yangzhifangtj@163.com; lixingrui@tjh.tjmu.edu.cn	36	8	8	FRONTIERS MEDIA SA	LAUSANNE	FRONT CELL DEV BIOL	FEB 1	2022	10	10.3389/fcell.2022.785058	http://dx.doi.org/10.3389/fcell.2022.785058	Cell Biology; Developmental Biology	Science Citation Index Expanded (SCI-EXPANDED)	35178386	View Full Record in Web of Science
J	Xie, Shumin; Jin, Li; He, Jun; Fu, Jinfeng; Yin, Tuanfang; Ren, Jihao; Liu, Wei	Analysis of mRNA m6A modification and mRNA expression profiles in middle ear cholesteatoma	FRONTIERS IN GENETICS	English	Article	mRNA; m(6)A; methylation profile; expression profile; middle ear cholesteatoma	LYMPHATIC VESSELS; GENE-EXPRESSION; PATHWAY; MUCIN; CELLS	Introduction: Middle ear cholesteatoma is characterized by the hyperproliferation of keratinocytes. In recent decades, N-6-methyladenosine (m(6)A) modification has been shown to play an essential role in the pathogenesis of many proliferative diseases. However, neither the m(6)A modification profile nor its potential role in the pathogenesis of middle ear cholesteatoma has currently been investig…	[Xie, Shumin] Cent South Univ, Otolaryngol Inst Major Dis, Dept Otolaryngol Head & Neck Surg, Hunan Prov Key Lab,Xiangya Hosp, Changsha, Hunan, Peoples R China; [Jin, Li; He, Jun; Fu, Jinfeng; Yin, Tuanfang; Ren, Jihao; Liu, Wei] Cent South Univ, Xiangya Hosp 2, Dept Otolaryngol Head & Neck Surg, Changsha, Hunan, Peoples R China	Central South University; Central South University	Liu, W (corresponding author), Cent South Univ, Xiangya Hosp 2, Dept Otolaryngol Head & Neck Surg, Changsha, Hunan, Peoples R China.	liuwei007@csu.edu.cn	38	2	2	FRONTIERS MEDIA SA	LAUSANNE	FRONT GENET	AUG 7	2023	14	10.3389/fgene.2023.1188048	http://dx.doi.org/10.3389/fgene.2023.1188048	Genetics & Heredity	Science Citation Index Expanded (SCI-EXPANDED)	37609036	View Full Record in Web of Science
J	Luo, Yunchen; Zhang, Zhijian; Xiang, Liping; Zhou, Bing; Wang, Xuejiao; Lin, Yi; Ding, Xiaoying; Liu, Fang; Lu, Yan; Peng, Yongde	Analysis of N6-Methyladenosine Methylation Modification in Fructose-Induced Non-Alcoholic Fatty Liver Disease	FRONTIERS IN ENDOCRINOLOGY	English	Article	fructose; lipid metabolism; non-alcoholic fatty liver disease; N6-methyladenosine; RNA methylation	RNA; OBESITY; CHREBP	Improvements in living standards have led to non-alcoholic fatty liver disease (NAFLD), one of the most common chronic liver diseases worldwide. Recent studies have shown that N6-methyladenosine (m6A), a type of RNA modification, is strongly associated with many important biological processes. However, the relationship between m6A methylation modifications and NAFLD remains poorly understood. In …	[Luo, Yunchen; Zhang, Zhijian; Wang, Xuejiao; Lin, Yi; Ding, Xiaoying; Liu, Fang; Peng, Yongde] Shanghai Jiao Tong Univ, Sch Med, Dept Endocrinol & Metab, Shanghai Gen Hosp, Shanghai, Peoples R China; [Xiang, Liping; Zhou, Bing; Lu, Yan] Fudan Univ, Zhongshan Hosp, Dept Endocrinol & Metab, Shanghai, Peoples R China	Shanghai Jiao Tong University; Fudan University	Peng, YD (corresponding author), Shanghai Jiao Tong Univ, Sch Med, Dept Endocrinol & Metab, Shanghai Gen Hosp, Shanghai, Peoples R China.;Lu, Y (corresponding author), Fudan Univ, Zhongshan Hosp, Dept Endocrinol & Metab, Shanghai, Peoples R China.	lu.yan2@zs-hospital.sh.cn; pengyongde0908@126.com	41	19	19	FRONTIERS MEDIA SA	LAUSANNE	FRONT ENDOCRINOL	DEC 7	2021	12	10.3389/fendo.2021.780617	http://dx.doi.org/10.3389/fendo.2021.780617	Endocrinology & Metabolism	Science Citation Index Expanded (SCI-EXPANDED)	34950107	View Full Record in Web of Science
J	Pei, Dongchen; Xu, Chaojie; Wang, Dong; Shi, Xiaoxue; Zhang, Yurui; Liu, Yi; Liu, Nan; Guo, Jianhua; Yu, Yang; Kang, Zhengjun; Zhu, Haipeng	Application of m6A and TME in Predicting the Prognosis and Treatment of Clear Cell Renal Cell Carcinoma	JOURNAL OF ONCOLOGY	English	Article		MESSENGER-RNAS; METHYLATED NUCLEOTIDES; TUMOR PROGRESSION; CANCER; MICROENVIRONMENT; LOCALIZATION; BLOCKADE	Background. Previous studies have shown that RNA N6-methyladenosine (m(6)A) plays an important role in the construction of the tumor microenvironment (TME). However, how m(6)A plays a role in the TME of clear cell renal cell carcinoma remains unclear. Methods. Based on 23 m(6)A modulators, we applied consensus cluster analysis to explore the different m(6)A modification profiles of ccRCC. The CIB…	[Pei, Dongchen; Xu, Chaojie; Wang, Dong; Shi, Xiaoxue; Zhang, Yurui; Liu, Yi; Liu, Nan; Guo, Jianhua; Yu, Yang; Kang, Zhengjun; Zhu, Haipeng] Zhengzhou Univ, Affiliated Hosp 5, Dept Urol, Zhengzhou, Henan, Peoples R China	Zhengzhou University	Zhu, HP (corresponding author), Zhengzhou Univ, Affiliated Hosp 5, Dept Urol, Zhengzhou, Henan, Peoples R China.	pdcdwz@163.com; xcj15020401030@163.com; 4920844@qq.com; zzusxx@126.com; zhang8263361@163.com; lysurgeon@hotmail.com; 962274874@qq.com; 869678771@qq.com; 418864396@qq.com; kzj7153@sina.com; zhpxsdwz@163.com	43	3	3	HINDAWI LTD	LONDON	J ONCOL	MAR 4	2022	2022	10.1155/2022/2910491	http://dx.doi.org/10.1155/2022/2910491	Oncology	Science Citation Index Expanded (SCI-EXPANDED)	35281520	View Full Record in Web of Science
J	Luan, Zhiwei; Wang, Yansong	Association between ankylosing spondylitis and m6A methylation	JOURNAL OF ORTHOPAEDIC SURGERY AND RESEARCH	English	Article	N6-methyladenosine; Ankylosing spondylitis; Bioinformatics	NUCLEAR RIBONUCLEOPROTEIN-G; ARTHROPLASTY; EXPRESSION; PROMOTES; PART	BackgroundN6-methyl adenosine (m6A) is the most common reversible mRNA modification in eukaryotes implicated in key roles in various biological processes. The purpose of our analysis was to examine the association of ankylosing spondylitis (AS) with m6A methylation.MethodWe obtained 72 samples from the data set GSE73754, including 52 AS patients and 20 healthy people. We divided the samples into …	[Luan, Zhiwei; Wang, Yansong] Harbin Med Univ, Affiliated Hosp 1, Dept Spine Surg, Harbin, Peoples R China; [Wang, Yansong] Harbin Med Univ, Affiliated Hosp 1, NHC Key Lab Cell Transplantat, Harbin 150001, Heilongjiang, Peoples R China; [Luan, Zhiwei] Chinese Minist Educ, Key Lab Myocardial Ischemia, Harbin, Peoples R China	Harbin Medical University; Harbin Medical University	Wang, YS (corresponding author), Harbin Med Univ, Affiliated Hosp 1, Dept Spine Surg, Harbin, Peoples R China.;Wang, YS (corresponding author), Harbin Med Univ, Affiliated Hosp 1, NHC Key Lab Cell Transplantat, Harbin 150001, Heilongjiang, Peoples R China.	wyshmu1975@163.com	38	5	5	BMC	LONDON	J ORTHOP SURG RES	OCT 7	2023	18	10.1186/s13018-023-04254-x	http://dx.doi.org/10.1186/s13018-023-04254-x	Orthopedics	Science Citation Index Expanded (SCI-EXPANDED)	37805597	View Full Record in Web of Science
J	Zhang, Tao; Gan, Yu; Zhu, Shuai	Association between autophagy and acute pancreatitis	FRONTIERS IN GENETICS	English	Review	acute pancreatitis; autophagy; N6-methyladenosine; mechanism; advance	IMPAIRED AUTOPHAGY; MESSENGER-RNA; TRANSCRIPTIONAL REPRESSOR; ACINAR-CELLS; MICE; ZKSCAN3; INFLAMMATION; DYSFUNCTION; BIOGENESIS; APOPTOSIS	Autophagy pathway involves maintaining intracellular homeostasis by regulating the degradation of cytoplasmic components. Disfunction of autophagic process has been confirmed to be critical mechanism in many diseases, including cancer, inflammation, infection, degeneration and metabolic disorders. Recent studies have shown that autophagy is one of the early events in acute pancreatitis. Impaired …	[Zhang, Tao; Zhu, Shuai] Cent South Univ, Xiangya Hosp, Dept Pancreat Surg, Changsha, Peoples R China; [Zhang, Tao; Zhu, Shuai] Cent South Univ, Xiangya Hosp, Dept Gen Surg, Changsha, Peoples R China; [Zhang, Tao; Zhu, Shuai] Xiangya Hosp, Natl Clin Res Ctr Geriatr Disorders, Changsha, Peoples R China; [Gan, Yu] Cent South Univ, Xiangya Hosp, Dept Urol, Changsha, Peoples R China	Central South University; Central South University; Central South University; Central South University	Zhu, S (corresponding author), Cent South Univ, Xiangya Hosp, Dept Pancreat Surg, Changsha, Peoples R China.;Zhu, S (corresponding author), Cent South Univ, Xiangya Hosp, Dept Gen Surg, Changsha, Peoples R China.;Zhu, S (corresponding author), Xiangya Hosp, Natl Clin Res Ctr Geriatr Disorders, Changsha, Peoples R China.;Gan, Y (corresponding author), Cent South Univ, Xiangya Hosp, Dept Urol, Chan…	148302039@csu.edu.cn; zhushuai@csu.edu.cn	83	5	5	FRONTIERS MEDIA SA	LAUSANNE	FRONT GENET	JAN 30	2023	14	10.3389/fgene.2023.998035	http://dx.doi.org/10.3389/fgene.2023.998035	Genetics & Heredity	Science Citation Index Expanded (SCI-EXPANDED)	36793898	View Full Record in Web of Science
J	Liu, Xiaochuan; Yuan, Jun; Zhang, Xudong; Li, Lin; Dai, Xiaoxia; Chen, Qi; Wang, Yinsheng	ATF3 Modulates the Resistance of Breast Cancer Cells to Tamoxifen through an N6-Methyladenosine-Based Epitranscriptomic Mechanism	CHEMICAL RESEARCH IN TOXICOLOGY	English	Article		DRUG-RESISTANCE; MOLECULAR-MECHANISMS; NUCLEAR-RNA; MET-DB; INFLAMMATION; METHYLATION; EXPRESSION; GENE	Tamoxifen has been used for years for treating estrogen receptor-positive breast cancer; drug resistance, however, constitutes one of the main challenges for this therapy. We found that the protein expression level of ATF3 is significantly higher in tamoxifen-resistant (TamR) MCF-7 cells than the corresponding parental cancer cells. In addition, ATF3 protein expression is positively correlated wi…	[Liu, Xiaochuan; Li, Lin; Dai, Xiaoxia; Wang, Yinsheng] Univ Calif Riverside, Dept Chem, Riverside, CA 92521 USA; [Yuan, Jun; Wang, Yinsheng] Univ Calif Riverside, Environm Toxicol Grad Program, Riverside, CA 92521 USA; [Zhang, Xudong; Chen, Qi] Univ Calif Riverside, Div Biomed Sci, Riverside, CA 92521 USA	University of California System; University of California Riverside; University of California System; University of California Riverside; University of California System; University of California Riverside	Wang, YS (corresponding author), Univ Calif Riverside, Dept Chem, Riverside, CA 92521 USA.;Wang, YS (corresponding author), Univ Calif Riverside, Environm Toxicol Grad Program, Riverside, CA 92521 USA.	Yinsheng.Wang@ucr.edu	52	20	21	AMER CHEMICAL SOC	WASHINGTON	CHEM RES TOXICOL	JUL 19	2021	34	10.1021/acs.chemrestox.1c00206	http://dx.doi.org/10.1021/acs.chemrestox.1c00206	Chemistry, Medicinal; Chemistry, Multidisciplinary; Toxicology	Science Citation Index Expanded (SCI-EXPANDED)	34213887	View Full Record in Web of Science
J	Song, Boce; Xie, Beili; Liu, Mingwang; Li, Haohao; Shi, Dazhuo; Zhao, Fuhai	Bibliometric and visual analysis of RAN methylation in cardiovascular disease	FRONTIERS IN CARDIOVASCULAR MEDICINE	English	Article	bibliometric analysis; RNA methylation; cardiovascular disease; visual analysis; citespace; VOSviewer	INDUCED CARDIAC-HYPERTROPHY; RNA METHYLATION; MESSENGER-RNA; RESEARCH TRENDS; ISCHEMIA; N-6-METHYLADENOSINE; N6-METHYLADENOSINE; PUBLICATIONS; INFLAMMATION; PROGRESSION	BackgroundRNA methylation is associated with cardiovascular disease (CVD) occurrence and development. The purpose of this study is to visually analyze the results and research trends of global RNA methylation in CVD.MethodsArticles and reviews on RNA methylation in CVD published before 6 November 2022 were searched in the Web of Science Core Collection. Visual and statistical analysis was perform…	[Song, Boce; Xie, Beili; Liu, Mingwang; Shi, Dazhuo; Zhao, Fuhai] China Acad Chinese Med Sci, Xiyuan Hosp, Beijing, Peoples R China; [Li, Haohao] Beijing Univ Chinese Med, Grad Sch, Beijing, Peoples R China; [Shi, Dazhuo; Zhao, Fuhai] Natl Clin Res Ctr Chinese Med Cardiol, Beijing, Peoples R China	China Academy of Chinese Medical Sciences; Xiyuan Hospital, CACMS; Beijing University of Chinese Medicine	Zhao, FH (corresponding author), China Acad Chinese Med Sci, Xiyuan Hosp, Beijing, Peoples R China.;Zhao, FH (corresponding author), Natl Clin Res Ctr Chinese Med Cardiol, Beijing, Peoples R China.	13911134962@163.com	83	0	0	FRONTIERS MEDIA SA	LAUSANNE	FRONT CARDIOVASC MED	MAR 30	2023	10	10.3389/fcvm.2023.1110718	http://dx.doi.org/10.3389/fcvm.2023.1110718	Cardiac & Cardiovascular Systems	Science Citation Index Expanded (SCI-EXPANDED)	37063953	View Full Record in Web of Science
J	Chen, Qiuxiang; Du, Xiaojing; Ruan, Pengcheng; Ye, Yumei; Zheng, Jin; Hu, Sunkuan	Bioinformatics Analysis Revealing the Correlation between NF-κB Signaling Pathway and Immune Infiltration in Gastric Cancer	COMPUTATIONAL AND MATHEMATICAL METHODS IN MEDICINE	English	Article		TUMOR MUTATIONAL BURDEN; INFLAMMATION; IMMUNOTHERAPY	Although the emerging of immunotherapy conferred a new landscape of gastric cancer (GC) treatment, its response rate was of significant individual differences. Insight into GC immune microenviroment may contribute to breaking the dilemma. To this end, the enrichment score of NF-kappa B signaling pathway was calculated in each GC sample from The Cancer Genome Atlas (TCGA) via ssGSEA algorithm, and…	[Chen, Qiuxiang; Ye, Yumei] Wenzhou Med Univ, Dept Ultrason Imaging, Affiliated Hosp 1, Wenzhou 325035, Zhejiang, Peoples R China; [Du, Xiaojing] Fudan Univ, Minhang Hosp, Dept Gastroenterol, 170 Xinsong Rd, Shanghai 201199, Peoples R China; [Ruan, Pengcheng] Fenghua Peoples Hosp, Dept Gen Surg, 36 Gongyuan Rd, Ningbo 315502, Zhejiang, Peoples R China; [Zheng, Jin] Fudan Univ, Minhang Hosp, Dept …	Wenzhou Medical University; Fudan University; Fudan University; Wenzhou Medical University	Zheng, J (corresponding author), Fudan Univ, Minhang Hosp, Dept Neurol, 170 Xinsong Rd, Shanghai 201199, Peoples R China.;Hu, SK (corresponding author), Wenzhou Med Univ, Dept Gastroenterol, Affiliated Hosp 1, Wenzhou 325035, Zhejiang, Peoples R China.	zhengjin22163@fudan.edu.cn; sunkuan130@163.com	54	0	0	HINDAWI LTD	LONDON	COMPUT MATH METHOD M	JUL 28	2022	2022	10.1155/2022/5385456	http://dx.doi.org/10.1155/2022/5385456	Mathematical & Computational Biology	Science Citation Index Expanded (SCI-EXPANDED)	35936362	View Full Record in Web of Science
J	Zhou, Zengding; Yang, Huizhong; Wang, Xiqiao; Yi, Lei	Blocking CCR10 Expression Activates m6A Methylation and Alleviates Vascular Endothelial Cell Injury	DISCOVERY MEDICINE	English	Article	CCR10; m6A methylation; endothelial cell injury; RNA-Seq; cell migration	M(6)A RNA METHYLATION; CARDIOVASCULAR-DISEASES; CCR10	Background: Cardiovascular disease, one of the most common types of disease in clinical practice today, carries a very high risk of disability and death. This research aims to examine genome-wide changes in injured human dermal microvascular en-dothelial cells (HDMECs) using the Ribonucleic Acid sequencing (RNA-Seq) technique, and to search for key genes influencing N6-methyladenosine (m6A) methy…	[Zhou, Zengding; Yang, Huizhong; Wang, Xiqiao; Yi, Lei] Shanghai Jiao Tong Univ, Ruijin Hosp, Sch Med, Dept Burn Surg, Shanghai 200025, Peoples R China	Shanghai Jiao Tong University	Wang, XQ; Yi, L (corresponding author), Shanghai Jiao Tong Univ, Ruijin Hosp, Sch Med, Dept Burn Surg, Shanghai 200025, Peoples R China.	wangxiqiao19820509@outlook.com; yilei19890506@yeah.net	31	3	3	DISCOVERY MEDICINE	TIMONIUM	DISCOV MED	FEB	2023	35	10.24976/Discov.Med.202335174.5	http://dx.doi.org/10.24976/Discov.Med.202335174.5	Medicine, Research & Experimental	Science Citation Index Expanded (SCI-EXPANDED)	37024440	View Full Record in Web of Science
J	Liu, Juan; Zhang, Xiaomin; Chen, Kun; Cheng, Yujie; Liu, Shuxun; Xia, Meng; Chen, Yali; Zhu, Ha; Li, Zhiqing; Cao, Xuetao	CCR7 Chemokine Receptor-Inducible Inc-Dpf3 Restrains Dendritic Cell Migration by Inhibiting HIF-1α-Mediated Glycolysis	IMMUNITY	English	Article		LYMPH-NODES; T-CELL; RNA MODIFICATIONS; METHYLATION; HOMEOSTASIS; ACTIVATION; RESOLUTION; RESPONSES; IMMUNITY; HYPOXIA	CCR7 chemokine receptor stimulation induces rapid but transient dendritic cell (DC) migration toward draining lymph nodes, which is critical for the initiation of protective immunity and maintenance of immune homeostasis. The mechanisms for terminating CCR7-mediated DC migration remain incompletely understood. Here we have identified a long non-coding RNA Inc-Dpf3 whose feedback restrained CCR7-m…	[Liu, Juan; Zhang, Xiaomin; Cheng, Yujie; Liu, Shuxun; Zhu, Ha; Cao, Xuetao] Second Mil Med Univ, Natl Key Lab Med Immunol, Shanghai 200433, Peoples R China; [Liu, Juan; Zhang, Xiaomin; Cheng, Yujie; Liu, Shuxun; Zhu, Ha; Cao, Xuetao] Second Mil Med Univ, Inst Immunol, Shanghai 200433, Peoples R China; [Chen, Kun; Xia, Meng; Li, Zhiqing; Cao, Xuetao] Chinese Acad Med Sci, Peking Union Med Coll, D…	Naval Medical University; Naval Medical University; Chinese Academy of Medical Sciences - Peking Union Medical College; Peking Union Medical College; Institute of Basic Medical Sciences - CAMS; Chinese Academy of Medical Sciences - Peking Union Medical College; Peking Union Medical College; Zhejiang University; Nankai University	Cao, XT (corresponding author), Second Mil Med Univ, Natl Key Lab Med Immunol, Shanghai 200433, Peoples R China.;Cao, XT (corresponding author), Second Mil Med Univ, Inst Immunol, Shanghai 200433, Peoples R China.;Cao, XT (corresponding author), Chinese Acad Med Sci, Peking Union Med Coll, Dept Immunol, Inst Basic Med Sci, Beijing 100005, Peoples R China.;Cao, XT (corresponding author), Chinese A…	juanliu@immunol.org; caoxt@immunol.org	53	218	237	CELL PRESS	CAMBRIDGE	IMMUNITY	MAR 19	2019	50	10.1016/j.immuni.2019.01.021	http://dx.doi.org/10.1016/j.immuni.2019.01.021	Immunology	Science Citation Index Expanded (SCI-EXPANDED)	30824325	View Full Record in Web of Science
J	Zou, Xihong; Liu, Chaoyi; Wu, Xudong; Yuan, Zhiyao; Yan, Fuhua	Changes in N6-methyladenosine RNA methylomes of human periodontal ligament cells in response to inflammatory conditions	JOURNAL OF PERIODONTAL RESEARCH	English	Article	histone modification; hPDLCs; inflammatory conditions; m6A methylation modification; osteogenic differentiation	STEM-CELLS; GENE-EXPRESSION; GLOBAL BURDEN; DIFFERENTIATION; DEMETHYLATION; METHYLATION; DISEASES; HEALTHY	ObjectiveTo investigate the changes in the m6A methylation modification profile of human periodontal ligament cells (hPDLCs) in response to inflammatory conditions. BackgroundPeriodontitis is an infectious disease of the periodontal support tissue that leads to the loss of alveolar bone. HPDLCs are primary cells that can repair periodontal tissue defects caused by periodontitis. However, the infl…	[Zou, Xihong; Yuan, Zhiyao; Yan, Fuhua] Nanjing Univ, Nanjing Stomatol Hosp, Dept Periodontol, Med Sch, 30 Zhongyang Rd, Nanjing 210008, Peoples R China; [Liu, Chaoyi] Hangzhou Stomatol Hosp, Hangzhou, Peoples R China; [Wu, Xudong] Nanjing Univ, Sch Life Sci, State Key Lab Pharmaceut Biotechnol, Nanjing, Peoples R China	Nanjing University; Nanjing University	Yuan, ZY; Yan, FH (corresponding author), Nanjing Univ, Nanjing Stomatol Hosp, Dept Periodontol, Med Sch, 30 Zhongyang Rd, Nanjing 210008, Peoples R China.	yuanzhiyao8828@163.com; yanfh@nju.edu.cn	61	2	3	WILEY	HOBOKEN	J PERIODONTAL RES	APR	2023	58	10.1111/jre.13105	http://dx.doi.org/10.1111/jre.13105	Dentistry, Oral Surgery & Medicine	Science Citation Index Expanded (SCI-EXPANDED)	36733232	View Full Record in Web of Science
J	Ouyang, Yulong; Tu, Yuanqing; Chen, Shuilin; Min, Huan; Wen, Zhexu; Zheng, Guihao; Wan, Ting; Fan, Hao; Yang, Wenzhao; Sun, Guicai	Characterization of immune microenvironment infiltration and m6A regulator-mediated RNA methylation modification patterns in osteoarthritis	FRONTIERS IN IMMUNOLOGY	English	Article	m(6)A regulator; immune microenvironment; osteoarthritis; RNA methylation; immunocytes	GENE-EXPRESSION; INFLAMMATION; CANCER	BackgroundFew studies have been reported the potential role of N6-methyladenosine (m(6)A) modification in osteoarthritis (OA). We investigated the patterns of m(6)A modification in the immune microenvironment of OA. MethodsWe evaluated the m(6)A modification patterns based on 22 m(6)A regulators in 139 OA samples and systematically associated these modification patterns with immune cell infiltrat…	[Ouyang, Yulong; Tu, Yuanqing; Chen, Shuilin; Wan, Ting; Fan, Hao; Yang, Wenzhao] Nanchang Univ, Nanchang, Jiangxi, Peoples R China; [Min, Huan] Jiangxi Prov Peoples Hosp, Nanchang, Jiangxi, Peoples R China; [Wen, Zhexu] Nanchang Univ, Affiliated Hosp 4, Nanchang, Jiangxi, Peoples R China; [Zheng, Guihao] Shangrao Peoples Hosp, Shangrao, Jiangxi, Peoples R China; [Sun, Guicai] Nanchang Univ, Affi…	Nanchang University; Nanchang University; Nanchang University	Sun, GC (corresponding author), Nanchang Univ, Affiliated Hosp 1, Nanchang, Jiangxi, Peoples R China.	13657000633@139.com	45	3	3	FRONTIERS MEDIA SA	LAUSANNE	FRONT IMMUNOL	NOV 23	2022	13	10.3389/fimmu.2022.1018701	http://dx.doi.org/10.3389/fimmu.2022.1018701	Immunology	Science Citation Index Expanded (SCI-EXPANDED)	36505479	View Full Record in Web of Science
J	He, Zhongyuan; Zhu, Zhengya; Tang, Tao; Guo, Peng; Gao, Manman; Li, Baoliang; Nguyen, Tran Canh Tung; Chen, Hongkun; Liu, Xizhe; Zhou, Zhiyu; Liu, Shaoyu	Characterization of ligamentum flavum hypertrophy based on m6A RNA methylation modification and the immune microenvironment	AMERICAN JOURNAL OF TRANSLATIONAL RESEARCH	English	Article	Ligamentum flavum hypertrophy; immune microenvironment; m6A RNA methylation; epigenetics; diagnostic model	SPINAL-CANAL STENOSIS; EXPRESSION; CELLS; CANCER; INFILTRATION; INFLAMMATION; FIBROSIS; DATABASE; PACKAGE	Objective: N6-methyladenosine (m6A) has been implicated in the progression of several diseases, and the role of epigenetic regulation in immunity is emerging, particularly for RNA m6A modification. However, it is unclear how m6A-related genes affect the immune microenvironment of ligamentum flavum hyperplasia (LFH). Therefore, we aimed to investigate the effect of m6A modification on the LFH immu…	[He, Zhongyuan; Zhu, Zhengya; Tang, Tao; Guo, Peng; Li, Baoliang; Chen, Hongkun; Zhou, Zhiyu; Liu, Shaoyu] Sun Yat sen Univ, Affiliated Hosp 7, Dept Orthopaed Surg, Innovat Platform Regenerat & Repair Spinal Cord &, Shenzhen, Guangdong, Peoples R China; [He, Zhongyuan; Tang, Tao; Guo, Peng; Li, Baoliang; Liu, Xizhe; Liu, Shaoyu] Sun Yatsen Univ, Affiliated Hosp 1, Guangdong Prov Key Lab Orthoped …	Sun Yat Sen University; Sun Yat Sen University; Shenzhen University; Shenzhen University; University of Toyama	Zhou, ZY (corresponding author), Sun Yat sen Univ, Affiliated Hosp 7, Dept Orthopaed Surg, Innovat Platform Regenerat & Repair Spinal Cord &, Shenzhen, Guangdong, Peoples R China.;Liu, XZ (corresponding author), Sun Yatsen Univ, Affiliated Hosp 1, Guangdong Prov Key Lab Orthoped & Traumatol, Guangzhou, Guangdong, Peoples R China.	gzxzhliu@qq.com; zhouzhy23@mail.sysu.edu.cn	52	3	3	E-CENTURY PUBLISHING CORP	MADISON	AM J TRANSL RES		2022	14			Oncology; Medicine, Research & Experimental	Science Citation Index Expanded (SCI-EXPANDED)	36628248	View Full Record in Web of Science
J	Han, Shiyu; Qi, Jiaqian; Fang, Kun; Wang, Hong; Tang, Yaqiong; Wu, Depei; Han, Yue	Characterization of m6A regulator-mediated methylation modification patterns and tumor microenvironment infiltration in acute myeloid leukemia	CANCER MEDICINE	English	Article	immunotherapy; leukemia; m6A; microenvironment; mutation burden	MESSENGER-RNA; M(6)A; EXPRESSION; CANCER; N6-METHYLADENOSINE; DIFFERENTIATION; BLOCKADE; CELLS; WTAP	Background Previous studies have confirmed the existence of epigenetic regulation of immune responses in acute myeloid leukemia. However, the potential role of RNA N6-methyladenosine (m6A) remodeling in tumor microenvironment (TME) infiltration remains unclear. Methods and Materials m6A patterns of 469 AML patients (420 of which provided survival data) based on 18 m6A regulators were systematical…	[Han, Shiyu; Qi, Jiaqian; Fang, Kun; Wang, Hong; Tang, Yaqiong; Wu, Depei; Han, Yue] Soochow Univ, Natl Clin Res Ctr Hematol Dis, Jiangsu Inst Hematol, Affiliated Hosp 1, Suzhou, Peoples R China; [Han, Shiyu; Qi, Jiaqian; Fang, Kun; Wang, Hong; Tang, Yaqiong; Wu, Depei; Han, Yue] Soochow Univ, Collaborat Innovat Ctr Hematol, Inst Blood & Marrow Transplantat, Suzhou, Peoples R China; [Han, Shiyu; …	Soochow University - China; Soochow University - China; University of Washington; University of Washington Seattle; Soochow University - China	Wu, DP; Han, Y (corresponding author), Soochow Univ, Jiangsu Inst Hematol, Affiliated Hosp 1, 188 Shizi St, Suzhou 215000, Peoples R China.	drwudepei@163.com; hanyue@suda.edu.cn	35	7	9	WILEY	HOBOKEN	CANCER MED-US	MAR	2022	11	10.1002/cam4.4531	http://dx.doi.org/10.1002/cam4.4531	Oncology	Science Citation Index Expanded (SCI-EXPANDED)	35023630	View Full Record in Web of Science
J	Ni, Xiuqin; Li, Xing; Hu, Bing; Wang, Li	Chronic allergic asthma alters m6A epitranscriptomic tagging of mRNAs and lncRNAs in the lung	BIOSCIENCE REPORTS	English	Article		TH2 CYTOKINES; MOUSE MODEL; METHYLTRANSFERASE; EOSINOPHILS; DEMETHYLASE; EXPRESSION; KINASE; CELLS	To evaluate the role of m(6)A methylation of mRNAs and long non-coding RNAs (lncRNAs) in chronic allergic asthma. Transcriptome-wide N6-methyladenosine (m(6)A) changes in BALB/c mice were profiled using immunoprecipitated methylated RNAs with microarrays in lung with chronic allergic asthma. Gene ontology (GO) and KEGG analyses were conducted. Target genes were verified by methylated RNA immunopr…	[Ni, Xiuqin] Jiangsu Food & Pharmaceut Sci Coll, Sch Hlth Sci, Dept Basic Med, Huaian 223003, Peoples R China; [Ni, Xiuqin; Hu, Bing; Wang, Li] Harbin Med Univ Daqing, Dept Anat, Daqing 163319, Peoples R China; [Li, Xing] Hongze Dist Peoples Hosp, Dept Neurol, Huaian 223001, Jiangsu, Peoples R China	Jiangsu Food & Pharmaceutical Science College; Harbin Medical University	Ni, XQ (corresponding author), Jiangsu Food & Pharmaceut Sci Coll, Sch Hlth Sci, Dept Basic Med, Huaian 223003, Peoples R China.;Ni, XQ (corresponding author), Harbin Med Univ Daqing, Dept Anat, Daqing 163319, Peoples R China.	20211034@jsfpc.edu.cn	42	3	3	PORTLAND PRESS LTD	LONDON	BIOSCIENCE REP	DEC	2022	42	10.1042/BSR20221395	http://dx.doi.org/10.1042/BSR20221395	Biochemistry & Molecular Biology; Cell Biology	Science Citation Index Expanded (SCI-EXPANDED)	36250525	View Full Record in Web of Science
J	Feng, Yue; Hu, Yun; Hou, Zhen; Sun, Qinwei; Jia, Yimin; Zhao, Ruqian	Chronic corticosterone exposure induces liver inflammation and fibrosis in association with m6A-linked post-transcriptional suppression of heat shock proteins in chicken	CELL STRESS & CHAPERONES	English	Article	Chicken liver; Inflammation; Fibrosis; Heat shock proteins; N6-methyladenosine	GALLUS-GALLUS-DOMESTICUS; ACUTE-PHASE PROTEINS; FATTY LIVER; MESSENGER-RNA; BROILER-CHICKENS; CYTOKINE PRODUCTION; 90 INHIBITOR; IN-VITRO; HSP70; STRESS	Our previous study had shown that chronic corticosterone (CORT) exposure causes excessive fat deposition in chicken liver, yet it remains unknown whether it is associated with inflammation and fibrosis. In general, heat shock proteins (HSPs) are activated in response to acute stress to play a cytoprotective role, and this activation is associated with m(6)A-mediated post-transcriptional regulatio…	[Feng, Yue; Hu, Yun; Hou, Zhen; Sun, Qinwei; Jia, Yimin; Zhao, Ruqian] Nanjing Agr Univ, MOE Joint Int Res Lab Anim Hlth & Food Safety, Nanjing 210095, Peoples R China; [Feng, Yue; Hu, Yun; Hou, Zhen; Sun, Qinwei; Jia, Yimin; Zhao, Ruqian] Nanjing Agr Univ, Coll Vet Med, Key Lab Anim Physiol & Biochem, Nanjing 210095, Peoples R China; [Jia, Yimin; Zhao, Ruqian] Jiangsu Collaborat Innovat Ctr Meat…	Nanjing Agricultural University; Nanjing Agricultural University	Jia, YM (corresponding author), Nanjing Agr Univ, MOE Joint Int Res Lab Anim Hlth & Food Safety, Nanjing 210095, Peoples R China.;Jia, YM (corresponding author), Nanjing Agr Univ, Coll Vet Med, Key Lab Anim Physiol & Biochem, Nanjing 210095, Peoples R China.;Jia, YM (corresponding author), Jiangsu Collaborat Innovat Ctr Meat Prod & Proc, Qual & Safety Control, Nanjing 210095, Peoples R China.	yiminj@njau.edu.cn	58	22	26	SPRINGER	DORDRECHT	CELL STRESS CHAPERON	JAN	2020	25	10.1007/s12192-019-01034-7	http://dx.doi.org/10.1007/s12192-019-01034-7	Cell Biology	Science Citation Index Expanded (SCI-EXPANDED)	31745845	View Full Record in Web of Science
J	Luo, Yuejun; Zhang, Zhihui; Zheng, Bo; Wu, Peng; Zhang, Guochao; Wang, Lide; Zeng, Qingpeng; Yang, Zhaoyang; Xue, Liyan; Zeng, Hua; Tan, Fengwei; Xue, Qi; Gao, Shugeng; Sun, Nan; He, Jie	Comprehensive analyses of N6-methyladenosine-related long noncoding RNA profiles with prognosis, chemotherapy response, and immune landscape in small cell lung cancer	CANCER SCIENCE	English	Article	immune response; individualized medicine; lncRNA; N-6-methyladenosine; small cell lung cancer	PROLIFERATION; GENES	Small cell lung cancer (SCLC) is the most devastating subtype of lung cancer with no clinically available prognostic biomarkers. N-6-methyladenosine (m(6)A) and noncoding RNAs play critical roles in cancer development and treatment response. However, little is known about m(6)A-related long noncoding RNAs (lncRNAs) in SCLC. We used 206 limited-stage SCLC (LS-SCLC) samples from two cohorts to unde…	[Luo, Yuejun; Zhang, Zhihui; Wu, Peng; Zhang, Guochao; Wang, Lide; Zeng, Qingpeng; Tan, Fengwei; Xue, Qi; Gao, Shugeng; Sun, Nan; He, Jie] Chinese Acad Med Sci & Peking Union Med Coll, Dept Thorac Surg, Natl Canc Ctr, Natl Clin Res Ctr,Canc Canc Hosp, Beijing 100021, Peoples R China; [Zhang, Zhihui; Wu, Peng; Zhang, Guochao; Wang, Lide; Zeng, Qingpeng; Tan, Fengwei; Xue, Qi; Gao, Shugeng; Sun, Na…	Chinese Academy of Medical Sciences - Peking Union Medical College; Peking Union Medical College; Chinese Academy of Medical Sciences - Peking Union Medical College; Peking Union Medical College; Chinese Academy of Medical Sciences - Peking Union Medical College; Peking Union Medical College	Sun, N; He, J (corresponding author), Chinese Acad Med Sci & Peking Union Med Coll, Dept Thorac Surg, Natl Canc Ctr, Natl Clin Res Ctr,Canc Canc Hosp, Beijing 100021, Peoples R China.	sunnan@vip.126.com; prof.jiehe@gmail.com	36	3	4	WILEY	HOBOKEN	CANCER SCI	DEC	2022	113	10.1111/cas.15553	http://dx.doi.org/10.1111/cas.15553	Oncology	Science Citation Index Expanded (SCI-EXPANDED)	36047973	View Full Record in Web of Science
J	Wan, Lei; Liu, Jian; Huang, Chuanbing; Zhu, Ziheng; Wang, Kun; Sun, Guanghan; Zhu, Lei; Hu, Zhongxiang	Comprehensive Analysis and Functional Characteristics of Differential Expression of N6-Methyladenosine Methylation Modification in the Whole Transcriptome of Rheumatoid Arthritis	MEDIATORS OF INFLAMMATION	English	Article		DNA METHYLATION; CELL; MICROENVIRONMENT; NUCLEOTIDES; PATTERNS	N6-methyladenosine (m6A) modification is the most prevalent chemical modification in eukaryotic mRNA and is associated with the development of various immune diseases. However, the role of m6A methylation in rheumatoid arthritis (RA) development is unclear. We preliminarily explored the role of m6A methylation-related mRNAs in RA for its clinical application. The discovery of m6A methylation-modi…	[Wan, Lei; Liu, Jian; Huang, Chuanbing; Zhu, Ziheng; Zhu, Lei] Anhui Univ Chinese Med, Affiliated Hosp 1, Hefei 230038, Peoples R China; [Wan, Lei; Liu, Jian; Wang, Kun] Key Lab Xinan Med Educ Minist, Hefei 230038, Peoples R China; [Wang, Kun; Sun, Guanghan] Anhui Univ Chinese Med, Coll Tradit Chinese Med, Hefei 230012, Peoples R China; [Hu, Zhongxiang] Univ Sci & Technol China, Affiliated Hosp 1…	Anhui University of Chinese Medicine; Anhui University of Chinese Medicine; Chinese Academy of Sciences; University of Science & Technology of China, CAS	Wan, L; Liu, J (corresponding author), Anhui Univ Chinese Med, Affiliated Hosp 1, Hefei 230038, Peoples R China.;Wan, L; Liu, J (corresponding author), Key Lab Xinan Med Educ Minist, Hefei 230038, Peoples R China.	yxwanlei@163.com; wllensy@163.com; chuanbingh@163.com; zyzhuziheng@163.com; yxwangk@163.com; 751728613@qq.com; 315893816@qq.com; huzx1986@126.com	44	8	10	HINDAWI LTD	LONDON	MEDIAT INFLAMM	OCT 25	2022	2022	10.1155/2022/4766992	http://dx.doi.org/10.1155/2022/4766992	Cell Biology; Immunology	Science Citation Index Expanded (SCI-EXPANDED)	36330380	View Full Record in Web of Science
J	Li, Huan; Lin, Jiahui; Cheng, Sha; Chi, Jingshu; Luo, Ju; Tang, Yu; Zhao, Wenfang; Shu, Yufeng; Liu, Xiaoming; Xu, Canxia	Comprehensive analysis of differences in N6-methyladenosine RNA methylomes in Helicobacter pylori infection	FRONTIERS IN CELL AND DEVELOPMENTAL BIOLOGY	English	Article	gastritis; Helicobacter pylori; MeRIP-seq; M6A; N6-methyladenosine	NF-KAPPA-B; MESSENGER-RNA; M(6)A; GENE; IDENTIFICATION; PROLIFERATION; INFLAMMATION; EXPRESSION; PATHWAY	Background: Helicobacter pylori (H.pylori) infection is an important factor in the occurrence of human gastric diseases, but its pathogenic mechanism is not clear. N6-methyladenosine (m6A) is the most prevalent reversible methylation modification in mammalian RNA and it plays a crucial role in controlling many biological processes. However, there are no studies reported that whether H. pylori inf…	[Li, Huan; Lin, Jiahui; Cheng, Sha; Chi, Jingshu; Luo, Ju; Tang, Yu; Zhao, Wenfang; Shu, Yufeng; Liu, Xiaoming; Xu, Canxia] Cent South Univ, Xiangya Hosp 3, Dept Gastroenterol, Changsha, Hunan, Peoples R China; [Liu, Xiaoming; Xu, Canxia] Cent South Univ, Hunan Key Lab Nonresolving Inflammat & Canc, Changsha, Hunan, Peoples R China	Central South University; Central South University	Liu, XM; Xu, CX (corresponding author), Cent South Univ, Xiangya Hosp 3, Dept Gastroenterol, Changsha, Hunan, Peoples R China.;Liu, XM; Xu, CX (corresponding author), Cent South Univ, Hunan Key Lab Nonresolving Inflammat & Canc, Changsha, Hunan, Peoples R China.	liuxiaoming26@163.com; xucanxia2000@163.com	74	2	2	FRONTIERS MEDIA SA	LAUSANNE	FRONT CELL DEV BIOL	JUN 7	2023	11	10.3389/fcell.2023.1136096	http://dx.doi.org/10.3389/fcell.2023.1136096	Cell Biology; Developmental Biology	Science Citation Index Expanded (SCI-EXPANDED)	37363723	View Full Record in Web of Science
J	Huang, Ting; Zeng, Yunhong; Yang, Yao; Fan, Haoqin; Deng, Youcai; Chen, Wenjuan; Liu, Jinqiao; Yang, Fan; Li, Wenfeng; Xiao, Yunbin	Comprehensive analysis of m6A methylomes in idiopathic pulmonary arterial hypertension	EPIGENETICS	English	Article	N6-methyladenosine; idiopathic pulmonary arterial hypertension; METTL3; YTHDF1; TP53; RPS27A; FoxO3; SMAD3	ANTI-APOPTOTIC RESPONSES; MESSENGER-RNA; INFLAMMATION; METHYLATION; PROGRESSION; INHIBITION; PATHWAYS; CELLS	Idiopathic pulmonary arterial hypertension (IPAH) is a serious and fatal disease. Recently, m6A has been reported to play an important role in the lungs of IPAH patients and experimental pulmonary hypertension models. However, the meaning of m6A mRNAs in the peripheral blood of IPAH patients remains largely unexplored. We aimed to construct a transcriptome-wide map of m6A mRNAs in the peripheral …	[Huang, Ting; Chen, Wenjuan; Liu, Jinqiao; Li, Wenfeng] Hunan Childrens Hosp, Dept Ultrasound, Changsha, Peoples R China; [Zeng, Yunhong; Fan, Haoqin; Xiao, Yunbin] Hunan Childrens Hosp, Dept Cardiol, Changsha 410007, Peoples R China; [Yang, Yao] Gen Hosp Western Theater Command PLA, Dept Pharm, Chengdu, Peoples R China; [Deng, Youcai] Army Med Univ, Inst Mat Med, Coll Pharm, Mil Med 3, Chongqing…	Army Medical University; Central South University	Xiao, YB (corresponding author), Hunan Childrens Hosp, Dept Cardiol, Changsha 410007, Peoples R China.	xiaoyunbinrui@126.com	53	4	4	TAYLOR & FRANCIS INC	PHILADELPHIA	EPIGENETICS-US	DEC 31	2023	18	10.1080/15592294.2023.2242225	http://dx.doi.org/10.1080/15592294.2023.2242225	Biochemistry & Molecular Biology; Genetics & Heredity	Science Citation Index Expanded (SCI-EXPANDED)	37537976	View Full Record in Web of Science
J	Han, Xu; Ji, Guang; Wang, Ning; Yi, Le; Mao, Yafei; Deng, Jinliang; Wu, Hongran; Ma, Shaojuan; Han, Jingzhe; Bu, Yi; Fang, Pingping; Liu, Juyi; Sun, Fanzhe; Song, Xueqin	Comprehensive analysis of m6A regulators characterized by the immune microenvironment in Duchenne muscular dystrophy	JOURNAL OF TRANSLATIONAL MEDICINE	English	Article	Duchenne muscular dystrophy; Immune microenvironment; m(6)A regulators; Diagnostic signature	TGF-BETA; MUSCLE; METHYLATION; PROGRESSION; PROMOTE; CELLS; MODEL	BackgroundDuchenne muscular dystrophy (DMD) is an X-linked, incurable, degenerative neuromuscular disease that is exacerbated by secondary inflammation. N-6-methyladenosine (m(6)A), the most common base modification of RNA, has pleiotropic immunomodulatory effects in many diseases. However, the role of m(6)A modification in the immune microenvironment of DMD remains elusive.MethodsOur study retro…	[Han, Xu; Ji, Guang; Wang, Ning; Yi, Le; Deng, Jinliang; Wu, Hongran; Ma, Shaojuan; Han, Jingzhe; Bu, Yi; Liu, Juyi; Sun, Fanzhe; Song, Xueqin] Hebei Med Univ, Dept Neurol, Hosp 2, Shijiazhuang 050000, Hebei, Peoples R China; [Han, Xu; Ji, Guang; Wang, Ning; Yi, Le; Deng, Jinliang; Wu, Hongran; Ma, Shaojuan; Han, Jingzhe; Bu, Yi; Liu, Juyi; Sun, Fanzhe; Song, Xueqin] Hebei Med Univ, Key Lab Neuro…	Hebei Medical University; Hebei Medical University; Hebei Medical University	Song, XQ (corresponding author), Hebei Med Univ, Dept Neurol, Hosp 2, Shijiazhuang 050000, Hebei, Peoples R China.;Song, XQ (corresponding author), Hebei Med Univ, Key Lab Neurol, Minist Educ, Shijiazhuang 050000, Hebei, Peoples R China.;Song, XQ (corresponding author), Neurol Lab Hebei Prov, Shijiazhuang 050000, Hebei, Peoples R China.	songxq1006@163.com	49	0	0	BMC	LONDON	J TRANSL MED	JUL 11	2023	21	10.1186/s12967-023-04301-5	http://dx.doi.org/10.1186/s12967-023-04301-5	Medicine, Research & Experimental	Science Citation Index Expanded (SCI-EXPANDED)	37434186	View Full Record in Web of Science
J	Wang, Xianpei; Wu, Ying; Guo, Ruoyao; Zhao, Linwei; Yan, Juanjuan; Gao, Chuanyu	Comprehensive Analysis of N6-Methyladenosine RNA Methylation Regulators in the Diagnosis and Subtype Classification of Acute Myocardial Infarction	JOURNAL OF IMMUNOLOGY RESEARCH	English	Article		CARDIOGENIC-SHOCK; MODERN MANAGEMENT; INFLAMMATION; M(6)A	Acute myocardial infarction (AMI) is still a huge danger to human health. Sensitive markers are necessary for the prediction of the risk of AMI and would be beneficial for managing the incidence rate. N6-methyladenosine (m6A) RNA methylation regulators have been confirmed to be involved in the development of various diseases. However, their function in AMI has not been fully elucidated. The purpo…	[Wang, Xianpei; Guo, Ruoyao; Zhao, Linwei; Yan, Juanjuan; Gao, Chuanyu] Zhengzhou Univ, Henan Prov Peoples Hosp, Dept Cardiol, Fuwai Cent China Cardiovasc Hosp,Peoples Hosp, Zhengzhou, Henan, Peoples R China; [Wu, Ying; Gao, Chuanyu] Zhengzhou Univ, Henan Prov Key Lab Control Coronary Heart Dis, Cent China Fuwai Hosp, Zhengzhou, Peoples R China	Zhengzhou University; Zhengzhou University	Wang, XP (corresponding author), Zhengzhou Univ, Henan Prov Peoples Hosp, Dept Cardiol, Fuwai Cent China Cardiovasc Hosp,Peoples Hosp, Zhengzhou, Henan, Peoples R China.	xianpeiwang@zzu.edu.cn; wuying.0803@zzu.edu.cn; ruoyao0421@163.com; zhaolinwei1991@163.com; 781544051@qq.com; gaocy6802@zzu.edu.cn	37	6	6	HINDAWI LTD	LONDON	J IMMUNOL RES	AUG 24	2022	2022	10.1155/2022/5173761	http://dx.doi.org/10.1155/2022/5173761	Immunology	Science Citation Index Expanded (SCI-EXPANDED)	36061306	View Full Record in Web of Science
J	Song, Zubiao; Liu, Yanmei; Fang, Xiaobo; Xie, Mengshu; Ma, Zhenyu; Zhong, Zhigang; Feng, Xuelin; Zhang, Weixi	Comprehensive analysis of the expression profile of circRNAs and their predicted protein-coding ability in the muscle of mdx mice	FUNCTIONAL & INTEGRATIVE GENOMICS	English	Article	Duchenne muscular dystrophy; Circular RNAs (circRNAs); ceRNA; Expression profile; Protein-coding ability; Muscle	CIRCULAR RNAS; MUSCULAR-DYSTROPHY; DIFFERENTIATION; TRANSLATION; BIOGENESIS; MYOBLASTS; ABUNDANT	Duchenne muscular dystrophy (DMD) is an X-linked genetic neuromuscular disease that is characterized by progressive muscle wasting and by defects in the regenerative capacity and inflammatory infiltration of muscle. Many noncoding RNAs (ncRNAs) participate in the pathophysiological mechanisms of this disease. To explore the role of circular RNAs (circRNAs), a type of ncRNAs, in DMD, microarray an…	[Song, Zubiao; Liu, Yanmei; Fang, Xiaobo; Feng, Xuelin; Zhang, Weixi] Sun Yat Sen Univ, Affiliated Hosp 1, Dept Neurol, 58,Zhongshan 2 Rd, Guangzhou 510080, Guangdong, Peoples R China; [Xie, Mengshu] Sun Yat Sen Univ, Affiliated Hosp 3, Dept Rehabil, Guangzhou, Guangdong, Peoples R China; [Ma, Zhenyu] Guangzhou Med Univ, Affiliated Hosp 2, Dept Neurol, Guangzhou, Guangdong, Peoples R China; [Zhon…	Sun Yat Sen University; Sun Yat Sen University; Guangzhou Medical University; Peking University	Zhang, WX (corresponding author), Sun Yat Sen Univ, Affiliated Hosp 1, Dept Neurol, 58,Zhongshan 2 Rd, Guangzhou 510080, Guangdong, Peoples R China.	zhangwxi@mail.sysu.edu.cn	33	6	7	SPRINGER HEIDELBERG	HEIDELBERG	FUNCT INTEGR GENOMIC	MAY	2020	20	10.1007/s10142-019-00724-w	http://dx.doi.org/10.1007/s10142-019-00724-w	Genetics & Heredity	Science Citation Index Expanded (SCI-EXPANDED)	31736012	View Full Record in Web of Science
J	Song, Juan; Zeng, Yingying; Zhu, Mengchan; Zhu, Guiping; Chen, Cuicui; Jin, Meiling; Wang, Jian; Song, Yuanlin	Comprehensive analysis of transcriptome-wide m6A methylome in the lung tissues of mice with acute particulate matter exposure	ECOTOXICOLOGY AND ENVIRONMENTAL SAFETY	English	Article	Particulate matter; N-6-methyladenosine; Lung; Epigenetics; MeRIP-seq	RNA METHYLATION; EXPRESSION; DNA; INFLAMMATION	Particulate matter (PM) exposure is identified as a critical risk factor for chronic airway diseases, but the biological mechanism of PM-induced lung damage was not fully elucidated. The m(6)A methylation, as the main member of epigenetic modifications, has been found to play an important role in different pulmonary diseases, but its regulatory effect on PM-induced lung damage remains unknown. Th…	[Song, Juan; Zeng, Yingying; Zhu, Mengchan; Zhu, Guiping; Chen, Cuicui; Jin, Meiling; Wang, Jian; Song, Yuanlin] Fudan Univ, Zhongshan Hosp, Dept Pulm Med, Shanghai 200030, Peoples R China	Fudan University	Wang, J (corresponding author), Fudan Univ, Zhongshan Hosp, Dept Pulm Med, Shanghai 200030, Peoples R China.	251328610@qq.com	32	9	9	ACADEMIC PRESS INC ELSEVIER SCIENCE	SAN DIEGO	ECOTOX ENVIRON SAFE	AUG	2022	241	10.1016/j.ecoenv.2022.113810	http://dx.doi.org/10.1016/j.ecoenv.2022.113810	Environmental Sciences; Toxicology	Science Citation Index Expanded (SCI-EXPANDED)	35777340	View Full Record in Web of Science
J	Zhang, Juanli; Yang, Qiaoli; Yang, Jiaojiao; Gao, Xiaoli; Luo, Ruirui; Huang, Xiaoyu; Yan, Zunqiang; Wang, Pengfei; Wang, Wei; Xie, Kaihui; Zhang, Bo; Gun, Shuangbao	Comprehensive Analysis of Transcriptome-wide m6A Methylome Upon Clostridium perfringens Beta2 Toxin Exposure in Porcine Intestinal Epithelial Cells by m6A Sequencing	FRONTIERS IN GENETICS	English	Article	m(6)A-seq; RNA-seq; beta2 toxin; M(6)A modification; porcine intestinal epithelial cells	RNA; RECOGNITION; TRANSLATION; PACKAGE; WNT11	Piglet diarrhea is a swine disease responsible for serious economic impacts in the pig industry. Clostridium perfringens beta2 toxin (CPB2), which is a major toxin of C. perfringens type C, may cause intestinal diseases in many domestic animals. N-6-methyladenosine (m(6)A) RNA methylation plays critical roles in many immune and inflammatory diseases in livestock and other animals. However, the ro…	[Zhang, Juanli; Yang, Qiaoli; Yang, Jiaojiao; Gao, Xiaoli; Luo, Ruirui; Huang, Xiaoyu; Yan, Zunqiang; Wang, Pengfei; Wang, Wei; Xie, Kaihui; Zhang, Bo; Gun, Shuangbao] Gansu Agr Univ, 1Coll Anim Sci & Technol, Lanzhou, Peoples R China; [Gun, Shuangbao] 2Gansu Res Ctr Swine Prod Engn & Technol, Lanzhou, Peoples R China	Gansu Agricultural University	Gun, SB (corresponding author), Gansu Agr Univ, 1Coll Anim Sci & Technol, Lanzhou, Peoples R China.;Gun, SB (corresponding author), 2Gansu Res Ctr Swine Prod Engn & Technol, Lanzhou, Peoples R China.	gunsbao056@126.com	48	5	6	FRONTIERS MEDIA SA	LAUSANNE	FRONT GENET	OCT 19	2021	12	10.3389/fgene.2021.689748	http://dx.doi.org/10.3389/fgene.2021.689748	Genetics & Heredity	Science Citation Index Expanded (SCI-EXPANDED)	34737761	View Full Record in Web of Science
J	Zou, Ke; Dong, Hui; Li, Mengmeng; Zhang, Ying; Zhang, Kai; Song, Danlin; Chu, Chuanlian	Comprehensive analysis of transcriptome-wide N6-methyladenosine methylomes in the Barrett's esophagus in rats	GENOMICS	English	Article	Barrett 's esophagus; m6A; MeRIP-seq; RNA-seq; Esophageal adenocarcinoma	MESSENGER-RNA; OXIDATIVE STRESS; M(6)A; METHYLATION; CANCER; INFLAMMATION; TRANSLATION; ACTIVATION; KIF20A; GROWTH	Purpose: As the most abundant RNA modification, N6-methyladenosine (m6A) methylation plays crucial roles in various diseases. The aim of this study is to comprehensively map the landscape of the mRNA m6A modification pattern in Barrett's esophagus (BE) in order to find key genes and potential therapy for BE and even esophageal adenocarcinoma (EAC).Methods: Methylated RNA immunoprecipitation seque…	[Zou, Ke; Dong, Hui; Li, Mengmeng; Zhang, Ying; Chu, Chuanlian] Shandong Med Univ & Shandong Acad Med Sci 1, Shandong First Med Univ, Cent Hosp, Jinan 250013, Shandong, Peoples R China; [Zou, Ke; Dong, Hui; Li, Mengmeng] Shandong Univ, Jinan Cent Hosp, 105 Jiefang Rd, Jinan 250013, Shandong, Peoples R China; [Zou, Ke] Jinan Digest Dis Clin Res Ctr, 105 Jiefang Rd, Jinan 250013, Shandong, Peoples …	Shandong First Medical University & Shandong Academy of Medical Sciences; Shandong First Medical University & Shandong Academy of Medical Sciences; Shandong University; Shandong University; Shandong Second Medical University	Chu, CL (corresponding author), Shandong Med Univ & Shandong Acad Med Sci 1, Shandong First Med Univ, Cent Hosp, Jinan 250013, Shandong, Peoples R China.	ccl1568@zxyy.cn	51	1	1	ACADEMIC PRESS INC ELSEVIER SCIENCE	SAN DIEGO	GENOMICS	SEP	2023	115	10.1016/j.ygeno.2023.110687	http://dx.doi.org/10.1016/j.ygeno.2023.110687	Biotechnology & Applied Microbiology; Genetics & Heredity	Science Citation Index Expanded (SCI-EXPANDED)	37454940	View Full Record in Web of Science
J	Liu, Qingsong; Chen, Nianzhi; Liu, Lu; Zheng, Qiao; Liao, Wenhao; Zhao, Maoyuan; Zeng, Jinhao; Tang, Jianyuan	Construction and Validation of Pyroptosis-Related lncRNA Prediction Model for Colon Adenocarcinoma and Immune Infiltration Analysis	DISEASE MARKERS	English	Article		CANCER; INFLAMMATION; EXPRESSION	Objective. Colon adenocarcinoma (COAD) is one of the most prevalent cancers worldwide. However, the pyroptosis-related lncRNAs of COAD have not been deeply examined and validated. Here, we constructed and validated a risk model on pyroptosis-related lncRNAs in COAD. Methods. The RNA sequencing transcriptome and clinical data of COAD patients were downloaded from The Cancer Genome Atlas (TCGA) dat…	[Liu, Qingsong] Hosp Chengdu Univ Tradit Chinese Med, Chengdu, Peoples R China; [Chen, Nianzhi] Chongqing Med Univ, Coll Biomed Engn, State Key Lab Ultrasound Med & Engn, Chongqing, Peoples R China; [Liu, Lu] Chengdu Univ Tradit Chinese Med, Coll Pharm, Chengdu, Peoples R China; [Zheng, Qiao; Liao, Wenhao; Zhao, Maoyuan] Hosp Chengdu Univ Tradit Chinese Med, Dept Oncol, Chengdu, Peoples R China; …	Chengdu University of Traditional Chinese Medicine; Chongqing Medical University; Chengdu University of Traditional Chinese Medicine; Chengdu University of Traditional Chinese Medicine; Chengdu University of Traditional Chinese Medicine	Zeng, JH; Tang, JY (corresponding author), Hosp Chengdu Univ Tradit Chinese Med, TCM Regulating Metab Dis Key Lab Sichuan Prov, Chengdu, Peoples R China.	1406310047@qq.com; saber930607@163.com; 1963407256@qq.com; 1262789588@qq.com; liaowenhao@stu.cdutcm.edu.cn; 13778079527@163.com; zengjinhao@cdutcm.edu.cn; tangjy@cdutcm.edu.cn	51	2	2	HINDAWI LTD	LONDON	DIS MARKERS	SEP 17	2022	2022	10.1155/2022/4492608	http://dx.doi.org/10.1155/2022/4492608	Biotechnology & Applied Microbiology; Genetics & Heredity; Medicine, Research & Experimental; Pathology	Science Citation Index Expanded (SCI-EXPANDED)	36168326	View Full Record in Web of Science
J	Ye, Wei; Huang, Tianpeng	Correlation analysis of m6A-modified regulators with immune microenvironment infiltrating cells in lung adenocarcinoma	PLOS ONE	English	Article		CANCER; EPIDEMIOLOGY; PD-1/PD-L1	Object Recent studies have demonstrated the epigenetic regulation of immune responses. However, the potential role of N6-methyladenosine methylation (m(6)A) in the tumor microenvironment (TME) remains unknown. Method In this study, the m(6)A modification patterns of LUAD samples were comprehensively evaluated by combining TCGA and GEO data, while these modification patterns were systematically li…	[Ye, Wei] Chinese Med Univ, Dept Resp Med, Wenzhou Municipal Hosp Tradit Chinese Med, Wenzhou Hosp Tradit Chinese Med, Wenzhou, Peoples R China; [Huang, Tianpeng] Chinese Med Univ, Dept Clin Lab, Wenzhou Municipal Hosp Tradit Chinese Med, Zhejiang Wenzhou Hosp Tradit Chinese Med, Wenzhou, Peoples R China	China Medical University; China Medical University	Huang, TP (corresponding author), Chinese Med Univ, Dept Clin Lab, Wenzhou Municipal Hosp Tradit Chinese Med, Zhejiang Wenzhou Hosp Tradit Chinese Med, Wenzhou, Peoples R China.	huangtianpeng1993@163.com	27	3	3	PUBLIC LIBRARY SCIENCE	SAN FRANCISCO	PLOS ONE	FEB 23	2022	17	10.1371/journal.pone.0264384	http://dx.doi.org/10.1371/journal.pone.0264384	Multidisciplinary Sciences	Science Citation Index Expanded (SCI-EXPANDED)	35196365	View Full Record in Web of Science
J	Luo, Jianming; Yu, Juntong; Peng, Xichun	Could partial nonstarch polysaccharides ameliorate cancer by altering m6A RNA methylation in hosts through intestinal microbiota?	CRITICAL REVIEWS IN FOOD SCIENCE AND NUTRITION	English	Review	Cancer; intestinal microbiota; m(6)A RNA methylation; methyl donor; nonstarch polysaccharides	ONE-CARBON METABOLISM; ALLEVIATING COLORECTAL-CANCER; GUT MICROBIOTA; HEPATOCELLULAR-CARCINOMA; GENE-EXPRESSION; SARGASSUM-FUSIFORME; ANTITUMOR-ACTIVITY; TUMOR PROGRESSION; FOLATE PRODUCTION; BREAST-CANCER	There is a growing scientific view that the improvement of cancer by nonstarch polysaccharides (NSPs) is mediated by intestinal microbiota. Intestinal bacteria affect the supply of methyl donor substances and influence N-6-methyladenosine (m(6)A) RNA methylation. As one of the epigenetic/epitranscriptomic modifications, m(6)A RNA methylation is closely related to the initiation and progression of…	[Luo, Jianming; Peng, Xichun] Jinan Univ, Dept Food Sci & Engn, Guangzhou 510632, Guangdong, Peoples R China; [Yu, Juntong] Jinan Univ, Coll Life Sci & Technol, Guangzhou, Guangdong, Peoples R China	Jinan University; Jinan University	Peng, XC (corresponding author), Jinan Univ, Dept Food Sci & Engn, Guangzhou 510632, Guangdong, Peoples R China.	tpxchun@jnu.edu.cn	122	11	12	TAYLOR & FRANCIS INC	PHILADELPHIA	CRIT REV FOOD SCI	NOV 7	2022	62	10.1080/10408398.2021.1927975	http://dx.doi.org/10.1080/10408398.2021.1927975	Food Science & Technology; Nutrition & Dietetics	Science Citation Index Expanded (SCI-EXPANDED)	34036843	View Full Record in Web of Science
J	Tan, Kezhe; Lu, Wenjie; Chen, Feng; Shi, Hao; Ma, Yingxuan; Chen, Zhou; Wu, Wei; Lv, Zhibao; Mo, Jialin	CRISPR-Cas9 knockout screening identifies KIAA1429 as an essential gene in Ewing sarcoma	JOURNAL OF EXPERIMENTAL & CLINICAL CANCER RESEARCH	English	Article	Ewing sarcoma; CRISPR-Cas9 screening; KIAA1429; STAT3; NKX2-2	GENOME	Background Ewing sarcoma (ES) is an aggressive childhood bone and soft tissue cancer. KIAA1429 is one type of N6-methyladenosine (m6A) writer that plays a tumor-progressive role in various cancers, but the role of KIAA1429 in ES remains to be elucidated. The aim of the study was to investigate the role of KIAA1429 in ES.Methods We performed a multi-omic screen including CRISPR-Cas9 functional gen…	[Tan, Kezhe; Chen, Feng; Shi, Hao; Ma, Yingxuan; Chen, Zhou; Wu, Wei; Lv, Zhibao] Shanghai Jiao Tong Univ, Shanghai Childrens Hosp, Sch Med, Dept Gen Surg, Shanghai, Peoples R China; [Lu, Wenjie; Mo, Jialin] Shanghai Jiao Tong Univ, Sch Med, Dept Histoembryol Genet & Dev Biol, Shanghai Key Lab Reprod Med, Shanghai, Peoples R China	Shanghai Jiao Tong University; Shanghai Jiao Tong University	Lv, ZB (corresponding author), Shanghai Jiao Tong Univ, Shanghai Childrens Hosp, Sch Med, Dept Gen Surg, Shanghai, Peoples R China.;Mo, JL (corresponding author), Shanghai Jiao Tong Univ, Sch Med, Dept Histoembryol Genet & Dev Biol, Shanghai Key Lab Reprod Med, Shanghai, Peoples R China.	zhibaolyu@163.com; mojialin@shsmu.edu.cn	37	3	3	BMC	LONDON	J EXP CLIN CANC RES	SEP 28	2023	42	10.1186/s13046-023-02828-5	http://dx.doi.org/10.1186/s13046-023-02828-5	Oncology	Science Citation Index Expanded (SCI-EXPANDED)	37759224	View Full Record in Web of Science
J	Chen, Xue; Tong, Xiaoliang; Zhou, Lu; Huang, Jian; Gao, Lihua; Zeng, Jinrong; Tan, Lina	Critical role of m6A modification in T-helper cell disorders	MOLECULAR IMMUNOLOGY	English	Review	M 6 A modification; T -helper cell; Immune; Th1 cells; Th2 cells; Th17 cells	B-CELLS; MESSENGER-RNA; HUMAN NAIVE; DIFFERENTIATION; METHYLATION; EXPRESSION; RESPONSES; MODEL; SKIN; REPLICATION	Diseases with T-helper cell subset imbalance involve multiple systems and organs. In addition to this, the pathogenesis of these diseases is always complex, and involves Th1, Th2, Th9, Th17, Th22, and Tfh cells. T -helper cell subset imbalance mediates immune responses to various pathogenic factors, by secreting specific cytokines. Although several studies have revealed the specific mechanisms of…	[Chen, Xue; Tong, Xiaoliang; Zhou, Lu; Huang, Jian; Gao, Lihua; Zeng, Jinrong; Tan, Lina] Cent South Univ, Xiangya Hosp 3, Dept Dermatol, 138 Tongzipo Rd, Changsha 410013, Hunan, Peoples R China	Central South University	Zeng, JR; Tan, LN (corresponding author), Cent South Univ, Xiangya Hosp 3, Dept Dermatol, 138 Tongzipo Rd, Changsha 410013, Hunan, Peoples R China.	zengjinrong1989@csu.edu.cn; tanlinawork@163.com	127	1	1	PERGAMON-ELSEVIER SCIENCE LTD	OXFORD	MOL IMMUNOL	NOV	2022	151	10.1016/j.molimm.2022.08.015	http://dx.doi.org/10.1016/j.molimm.2022.08.015	Biochemistry & Molecular Biology; Immunology	Science Citation Index Expanded (SCI-EXPANDED)	36058047	View Full Record in Web of Science
J	Zhang, Xinmin; Cai, He; Xu, He; Dong, Su; Ma, Haichun	Critical roles of m6A methylation in cardiovascular diseases	FRONTIERS IN CARDIOVASCULAR MEDICINE	English	Review	cardiovascular diseases; m(6)A methylation; epigenetic; cardiac hypertrophy; heart failure; ischemic heart disease	CARDIAC ISCHEMIA/REPERFUSION INJURY; MESSENGER-RNA; INFLAMMATORY RESPONSE; REPERFUSION INJURY; GENE-EXPRESSION; HEART-FAILURE; DEMETHYLASE; METTL3; ATHEROSCLEROSIS; ALKBH5	Cardiovascular diseases (CVDs) have been established as a major cause of mortality globally. However, the exact pathogenesis remains obscure. N6-methyladenosine (m(6)A) methylation is the most common epigenetic modification on mRNAs regulated by methyltransferase complexes (writers), demethylase transferases (erasers) and binding proteins (readers). It is now understood that m(6)A is a major play…	[Zhang, Xinmin; Dong, Su; Ma, Haichun] First Hosp Jilin Univ, Dept Anesthesiol, Changchun, Peoples R China; [Zhang, Xinmin] First Hosp Jilin Univ, Publ Lab Platform, Changchun, Peoples R China; [Cai, He] First Hosp Jilin Univ, Cardiovasc Ctr, Changchun, Peoples R China; [Xu, He] First Hosp Jilin Univ, Dept Integrat Med, Lequn Branch, Changchun, Peoples R China	Jilin University; Jilin University; Jilin University; Jilin University	Ma, HC (corresponding author), First Hosp Jilin Univ, Dept Anesthesiol, Changchun, Peoples R China.	mahc@jlu.edu.cn	102	1	1	FRONTIERS MEDIA SA	LAUSANNE	FRONT CARDIOVASC MED	MAY 19	2023	10	10.3389/fcvm.2023.1187514	http://dx.doi.org/10.3389/fcvm.2023.1187514	Cardiac & Cardiovascular Systems	Science Citation Index Expanded (SCI-EXPANDED)	37273867	View Full Record in Web of Science
J	Tian, Mi; Mao, Lei; Zhang, Li	Crosstalk among N6-methyladenosine modification and RNAs in central nervous system injuries	FRONTIERS IN CELLULAR NEUROSCIENCE	English	Review	central nervous system injuries; m6A modification; neurological impairment; apoptosis; inflammation; downstream molecules	SINGLE-NUCLEOTIDE-RESOLUTION; TRAUMATIC BRAIN-INJURY; M(6)A READER YTHDC1; MESSENGER-RNA; N-6-METHYLADENOSINE MODIFICATION; COMPREHENSIVE ANALYSIS; AXON REGENERATION; EMERGING ROLES; MECHANISMS; METHYLATION	Central nervous system (CNS) injuries, including traumatic brain injury (TBI), intracerebral hemorrhage (ICH) and ischemic stroke, are the most common cause of death and disability around the world. As the most common modification on ribonucleic acids (RNAs), N6-methyladenosine (m6A) modification has recently attracted great attentions due to its functions in determining the fate of RNAs through …	[Tian, Mi] Southeast Univ, Affiliated Zhongda Hosp, Dept Anesthesiol, Nanjing, Jiangsu, Peoples R China; [Mao, Lei; Zhang, Li] Nanjing Univ, Jinling Hosp, Sch Med, Dept Neurosurg, Nanjing, Jiangsu, Peoples R China	Southeast University - China; Nanjing University	Zhang, L (corresponding author), Nanjing Univ, Jinling Hosp, Sch Med, Dept Neurosurg, Nanjing, Jiangsu, Peoples R China.	zhangli2007js@126.com	139	10	10	FRONTIERS MEDIA SA	LAUSANNE	FRONT CELL NEUROSCI	SEP 29	2022	16	10.3389/fncel.2022.1013450	http://dx.doi.org/10.3389/fncel.2022.1013450	Neurosciences	Science Citation Index Expanded (SCI-EXPANDED)	36246528	View Full Record in Web of Science
J	Wang, Dan; Han, Yingying; Peng, Lushan; Huang, Tao; He, Xiaoyun; Wang, Junpu; Ou, Chunlin	Crosstalk between N6-methyladenosine (m6A) modification and noncoding RNA in tumor microenvironment	INTERNATIONAL JOURNAL OF BIOLOGICAL SCIENCES	English	Review	m6A; ncRNA; exosome; tumor metastasis; tumor microenvironment; biomarker; targeted therapy	CANCER-ASSOCIATED FIBROBLASTS; REGULATORY T-CELLS; STEM-LIKE CELLS; MESSENGER-RNA; NUCLEAR-RNA; N-6-METHYLADENOSINE RNA; SUPPRESSOR-CELLS; LIPID-METABOLISM; HUMAN BREAST; M(6)A	N6-methyladenosine (m6A) is the most abundant RNA modification in eukaryotes, and it participates in the regulation of pathophysiological processes in various diseases, including malignant tumors, by regulating the expression and function of both coding and non-coding RNAs (ncRNAs). More and more studies demonstrated that m6A modification regulates the production, stability, and degradation of nc…	[Wang, Dan; Han, Yingying; Peng, Lushan; Huang, Tao; Wang, Junpu; Ou, Chunlin] Cent South Univ, Xiangya Hosp, Dept Pathol, Changsha 410008, Hunan, Peoples R China; [He, Xiaoyun] Cent South Univ, Xiangya Hosp, Dept Ultrasound Imaging, Changsha 410008, Hunan, Peoples R China; [Wang, Junpu] Cent South Univ, Sch Basic Med, Dept Pathol, Changsha 410031, Hunan, Peoples R China; [Wang, Junpu] Cent South…	Central South University; Central South University; Central South University; Central South University; Central South University	Wang, JP; Ou, CL (corresponding author), Cent South Univ, Xiangya Hosp, Dept Pathol, Changsha 410008, Hunan, Peoples R China.;He, XY (corresponding author), Cent South Univ, Xiangya Hosp, Dept Ultrasound Imaging, Changsha 410008, Hunan, Peoples R China.	hexiaoyun@csu.edu.cn; wang-jp2013@csu.edu.cn; ouchunlin@csu.edu.cn	210	14	14	IVYSPRING INT PUBL	LAKE HAVEN	INT J BIOL SCI		2023	19	10.7150/ijbs.79651	http://dx.doi.org/10.7150/ijbs.79651	Biochemistry & Molecular Biology; Biology	Science Citation Index Expanded (SCI-EXPANDED)	37151887	View Full Record in Web of Science
J	Lu, Na; Li, Xingmei; Yu, Jiayao; Li, Yi; Wang, Chao; Zhang, Lili; Wang, Tian; Zhong, Xiang	Curcumin Attenuates Lipopolysaccharide-Induced Hepatic Lipid Metabolism Disorder by Modification of m6A RNA Methylation in Piglets	LIPIDS	English	Article	Curcumin; Lipid metabolism; Liver injury; LPS piglets; m(6)A RNA methylation	NF-KAPPA-B; GENE-EXPRESSION; STELLATE CELLS; MESSENGER-RNA; LIVER FIBROSIS; NUCLEAR-RNA; IN-VITRO; OBESITY; TRANSLATION; ACTIVATION	N-6-methyladenosine (m(6)A) regulates gene expression and affects cellular metabolism. In this study, we checked whether the regulation of lipid metabolism by curcumin is associated with m(6)A RNA methylation. We investigated the effects of dietary curcumin supplementation on lipopolysaccharide (LPS)-induced liver injury and lipid metabolism disorder, and on m(6)A RNA methylation in weaned piglet…	[Lu, Na; Yu, Jiayao; Li, Yi; Wang, Chao; Zhang, Lili; Wang, Tian; Zhong, Xiang] Nanjing Agr Univ, Coll Anim Sci & Technol, Nanjing, Jiangsu, Peoples R China; [Li, Xingmei] Nanjing Hongshan Forest Zoo, Dept Anim Feed Sci, Nanjing, Jiangsu, Peoples R China	Nanjing Agricultural University	Zhong, X (corresponding author), Nanjing Agr Univ, Coll Anim Sci & Technol, Nanjing, Jiangsu, Peoples R China.	zhongxiang@njau.edu.cn	58	89	101	WILEY	HOBOKEN	LIPIDS	JAN	2018	53	10.1002/lipd.12023	http://dx.doi.org/10.1002/lipd.12023	Biochemistry & Molecular Biology; Nutrition & Dietetics	Science Citation Index Expanded (SCI-EXPANDED)	29488640	View Full Record in Web of Science
J	Xu, Xuefeng; Zheng, Fei; Xu, Shanshan; Hu, Minfei; Hang, Chengcheng; Liu, Lingke; Shen, Chencong; Gu, Weizhong; Du, Lizhong	Decreased ubiquitin modifying enzyme A20 associated with hyper-responsiveness to ovalbumin challenge following intrauterine growth restriction	RESPIRATORY RESEARCH	English	Article	A20; Asthma; Intrauterine growth restriction; RNA modification; Ubiquitination	LOW-BIRTH-WEIGHT; AIRWAY INFLAMMATION; DENDRITIC CELLS; ASTHMA; METHYLATION; EXPRESSION; RECEPTOR	BackgroundIntrauterine growth restriction (IUGR) is strongly correlated with an increased risk of asthma later in life. Farm dust protects mice from developing house dust mite-induced asthma, and loss of ubiquitin modifying enzyme A20 in lung epithelium would abolish this protective effect. However, the mechanisms of A20 in the development of asthma following IUGR remains unknown.MethodsAn IUGR r…	[Xu, Xuefeng; Zheng, Fei; Xu, Shanshan; Hu, Minfei; Hang, Chengcheng; Liu, Lingke; Shen, Chencong] Zhejiang Univ, Childrens Hosp, Natl Clin Res Ctr Child Hlth, Sch Med,Dept Rheumatol Immunol & Allergy, Hangzhou 310052, Peoples R China; [Gu, Weizhong] Zhejiang Univ, Childrens Hosp, Natl Clin Res Ctr Child Hlth, Dept Pathol,Sch Med, Hangzhou 310052, Peoples R China; [Du, Lizhong] Zhejiang Univ, Chi…	Zhejiang University; Zhejiang University; Zhejiang University	Du, LZ (corresponding author), Zhejiang Univ, Childrens Hosp, Natl Clin Res Ctr Child Hlth, Dept Neonatol,Sch Med, Hangzhou 310052, Peoples R China.	dulizhong@zju.edu.cn	31	0	0	BMC	LONDON	RESP RES	FEB 14	2023	24	10.1186/s12931-023-02360-2	http://dx.doi.org/10.1186/s12931-023-02360-2	Respiratory System	Science Citation Index Expanded (SCI-EXPANDED)	36788604	View Full Record in Web of Science
J	He, Li; Liu, Lan; Xu, Dan; Tu, Ying; Yang, Chenling; Zhang, Mei; Wang, Hongyun; Nong, Xiang	Deficiency of N6-Methyladenosine Demethylase ALKBH5 Alleviates Ultraviolet B Radiation-Induced Chronic Actinic Dermatitis via Regulating Pyroptosis	INFLAMMATION	English	Article	chronic actinic dermatitis; pyroptosis; inflammation; ALKBH5; ultraviolet B.	KERATINOCYTES	Pyroptosis is an inflammatory programmed cell death (PCD) and is reported to be associated with N6-methyladenosine (m6A) modification. This study aimed to investigate the mechanism of m6A demethylase AlkB homolog 5 (ALKBH5) in pyroptosis in the process of chronic actinic dermatitis (CAD). Changes of m6A-related genes were evaluated between CAD and normal samples using quantitative reverse-transcr…	[He, Li; Liu, Lan; Xu, Dan; Tu, Ying; Yang, Chenling; Zhang, Mei; Wang, Hongyun; Nong, Xiang] Kunming Med Univ, Dept Dermatol, Affiliated Hosp 1, 295 Xichang Rd, Kunming 650032, Yunnan, Peoples R China	Kunming Medical University	Nong, X (corresponding author), Kunming Med Univ, Dept Dermatol, Affiliated Hosp 1, 295 Xichang Rd, Kunming 650032, Yunnan, Peoples R China.	nx7011@126.com	29	0	0	SPRINGER/PLENUM PUBLISHERS	NEW YORK	INFLAMMATION	FEB	2024	47	10.1007/s10753-023-01901-7	http://dx.doi.org/10.1007/s10753-023-01901-7	Cell Biology; Immunology	Science Citation Index Expanded (SCI-EXPANDED)	37740102	View Full Record in Web of Science
J	Li, Xinzhi; Yang, Ying; Li, Zhenzhi; Wang, Yuqin; Qiao, Jingting; Chen, Zheng	Deficiency of WTAP in islet beta cells results in beta cell failure and diabetes in mice	DIABETOLOGIA	English	Article	Hyperglycaemia; Insulin secretion; Islet beta cells; METTL3; N-6-methyladenosine; WTAP	GENE-EXPRESSION; METHYLATION; MAFA	Aims/hypothesisN(6)-methyladenosine (m(6)A) mRNA methylation and m(6)A-related proteins (methyltransferase-like 3 [METTL3], methyltransferase-like 14 [METTL14] and YTH domain containing 1 [YTHDC1]) have been shown to regulate islet beta cell function and the pathogenesis of diabetes. However, whether Wilms' tumour 1-associating protein (WTAP), a key regulator of the m(6)A RNA methyltransferase co…	[Li, Xinzhi; Yang, Ying; Li, Zhenzhi; Wang, Yuqin; Chen, Zheng] Harbin Inst Technol, HIT Ctr Life Sci, Sch Life Sci & Technol, Harbin, Peoples R China; [Qiao, Jingting] Tianjin Med Univ Gen Hosp, Dept Endocrinol & Metab, Tianjin, Peoples R China	Harbin Institute of Technology; Tianjin Medical University	Chen, Z (corresponding author), Harbin Inst Technol, HIT Ctr Life Sci, Sch Life Sci & Technol, Harbin, Peoples R China.	chenzheng@hit.edu.cn	29	13	13	SPRINGER	NEW YORK	DIABETOLOGIA	JUN	2023	66	10.1007/s00125-023-05900-z	http://dx.doi.org/10.1007/s00125-023-05900-z	Endocrinology & Metabolism	Science Citation Index Expanded (SCI-EXPANDED)	36920524	View Full Record in Web of Science
J	Lin, Ruirong; Zhan, Ming; Yang, Linhua; Wang, Hui; Shen, Hui; Huang, Shuai; Huang, Xince; Xu, Sunwang; Zhang, Zijie; Li, Weijian; Liu, Qiang; Shi, Yongsheng; Chen, Wei; Yu, Jianxiu; Wang, Jian	Deoxycholic acid modulates the progression of gallbladder cancer through N6-methyladenosine-dependent microRNA maturation	ONCOGENE	English	Article		BILE-ACIDS; CHOLANGIOCYTE PROLIFERATION; NUCLEAR-RNA; MESSENGER; METABOLISM; APOPTOSIS; N6-METHYLADENOSINE; INFLAMMATION; ACTIVATION; ENDOCRINE	Bile acids (BAs), well-defined signaling molecules with diverse metabolic functions, play important roles in cellular processes associated with many cancers. As one of the most common BAs, deoxycholic acid (DCA) is originally synthesized in the liver, stored in the gallbladder, and processed in the gut. DCA plays crucial roles in various tumors; however, functions and molecular mechanisms of DCA …	[Lin, Ruirong; Zhan, Ming; Yang, Linhua; Wang, Hui; Shen, Hui; Huang, Shuai; Huang, Xince; Xu, Sunwang; Zhang, Zijie; Li, Weijian; Chen, Wei; Wang, Jian] Shanghai Jiao Tong Univ, Sch Med, Renji Hosp, Dept Biliary Pancreat Surg, Shanghai 200127, Peoples R China; [Liu, Qiang; Shi, Yongsheng] Shanghai Jiao Tong Univ, Sch Med, Renji Hosp, Dept Pathol, Shanghai 200127, Peoples R China; [Yu, Jianxiu] S…	Shanghai Jiao Tong University; Shanghai Jiao Tong University; Shanghai Jiao Tong University; Shanghai Jiao Tong University	Wang, J (corresponding author), Shanghai Jiao Tong Univ, Sch Med, Renji Hosp, Dept Biliary Pancreat Surg, Shanghai 200127, Peoples R China.;Yu, JX (corresponding author), Shanghai Jiao Tong Univ, Sch Med, Shanghai Key Lab Tumor Microenvironm & Inflammat, Dept Biochem & Mol Cell Biol, Shanghai 200025, Peoples R China.;Yu, JX; Wang, J (corresponding author), Shanghai Jiao Tong Univ, Sch Med, Renji …	Jianxiu.Yu@gmail.com; dr_wangjian@126.com	62	58	62	SPRINGERNATURE	LONDON	ONCOGENE	JUN 25	2020	39	10.1038/s41388-020-1349-6	http://dx.doi.org/10.1038/s41388-020-1349-6	Biochemistry & Molecular Biology; Oncology; Cell Biology; Genetics & Heredity	Science Citation Index Expanded (SCI-EXPANDED)	32514152	View Full Record in Web of Science
J	Geng, Qishun; Cao, Xiaoxue; Fan, Danping; Gu, Xiaofeng; Zhang, Qian; Zhang, Mengxiao; Wang, Zheng; Deng, Tingting; Xiao, Cheng	Diagnostic gene signatures and aberrant pathway activation based on m6A methylation regulators in rheumatoid arthritis	FRONTIERS IN IMMUNOLOGY	English	Article	rheumatoid arthritis; N6-methyladenosine; IGF2BP3; cell cycle; M1 macrophages		PurposeRheumatoid arthritis (RA) is a chronic autoimmune disease (AD) characterized by persistent synovial inflammation, bone erosion and progressive joint destruction. This research aimed to elucidate the potential roles and molecular mechanisms of N6-methyladenosine (m6A) methylation regulators in RA. MethodsAn array of tissues from 233 RA and 126 control samples was profiled and integrated for…	[Geng, Qishun; Cao, Xiaoxue; Xiao, Cheng] Chinese Acad Med Sci & Peking Union Med Coll, China Japan Friendship Hosp, Inst Clin Med Sci, Beijing, Peoples R China; [Geng, Qishun; Cao, Xiaoxue; Zhang, Mengxiao; Deng, Tingting; Xiao, Cheng] China Japan Friendship Hosp, Inst Clin Med Sci, Beijing, Peoples R China; [Fan, Danping] China Acad Chinese Med Sci, Expt Res Ctr, Beijing Key Lab Res Chinese Med…	China-Japan Friendship Hospital; Chinese Academy of Medical Sciences - Peking Union Medical College; Peking Union Medical College; China-Japan Friendship Hospital; China Academy of Chinese Medical Sciences; Experimental Research Center, CACMS; Chinese Academy of Agricultural Sciences; Biotechnology Research Institute, CAAS; RIKEN; China-Japan Friendship Hospital	Xiao, C (corresponding author), Chinese Acad Med Sci & Peking Union Med Coll, China Japan Friendship Hosp, Inst Clin Med Sci, Beijing, Peoples R China.;Deng, TT; Xiao, C (corresponding author), China Japan Friendship Hosp, Inst Clin Med Sci, Beijing, Peoples R China.;Xiao, C (corresponding author), China Japan Friendship Hosp, Dept Emergency, Beijing, Peoples R China.	ttdeng1983@163.com; xc2002812@126.com	38	16	16	FRONTIERS MEDIA SA	LAUSANNE	FRONT IMMUNOL	DEC 13	2022	13	10.3389/fimmu.2022.1041284	http://dx.doi.org/10.3389/fimmu.2022.1041284	Immunology	Science Citation Index Expanded (SCI-EXPANDED)	36582238	View Full Record in Web of Science
J	Shi, Xiangwen; Ni, Haonan; Wu, Yipeng; Guo, Minzheng; Wang, Bin; Zhang, Yue; Zhang, Bihuan; Xu, Yongqing	Diagnostic signature, subtype classification, and immune infiltration of key m6A regulators in osteomyelitis patients	FRONTIERS IN GENETICS	English	Article	N6-methyladenosine (m6A); osteomyelitis; diagnosis; immune infiltration; subtype	DISCOVERY; CHILDREN; OXIDE; TOOL	Background:As a recurrent inflammatory bone disease, the treatment of osteomyelitis is always a tricky problem in orthopaedics. N6-methyladenosine (m6A) regulators play significant roles in immune and inflammatory responses. Nevertheless, the function of m6A modification in osteomyelitis remains unclear. Methods:Based on the key m6A regulators selected by the GSE16129 dataset, a nomogram model wa…	[Shi, Xiangwen; Ni, Haonan; Wu, Yipeng; Guo, Minzheng; Wang, Bin; Zhang, Yue; Zhang, Bihuan] Kunming Med Univ, Sch Med, Kunming, Peoples R China; [Wu, Yipeng; Xu, Yongqing] 920th Hosp Joint Logist Support Force, Dept Orthoped Surg, Kunming, Peoples R China; [Wu, Yipeng; Xu, Yongqing] Lab Clin Med Ctr, Yunnan Traumatol & Orthoped, Kunming, Peoples R China	Kunming Medical University	Xu, YQ (corresponding author), 920th Hosp Joint Logist Support Force, Dept Orthoped Surg, Kunming, Peoples R China.;Xu, YQ (corresponding author), Lab Clin Med Ctr, Yunnan Traumatol & Orthoped, Kunming, Peoples R China.	xuyongqingkm@163.net	62	4	5	FRONTIERS MEDIA SA	LAUSANNE	FRONT GENET	DEC 5	2022	13	10.3389/fgene.2022.1044264	http://dx.doi.org/10.3389/fgene.2022.1044264	Genetics & Heredity	Science Citation Index Expanded (SCI-EXPANDED)	36544487	View Full Record in Web of Science
J	Napoli, Claudio; Benincasa, Giuditta; Schiano, Concetta; Salvatore, Marco	Differential epigenetic factors in the prediction of cardiovascular risk in diabetic patients	EUROPEAN HEART JOURNAL-CARDIOVASCULAR PHARMACOTHERAPY	English	Article	Diabetic vasculature; Epigenetics; Cardiovascular prevention; Network medicine; Machine learning; Personalized therapy	HEART-FAILURE; INFLAMMATION; METFORMIN; METHYLTRANSFERASE; MECHANISMS; MICRORNAS; MEDICINE; DISEASE; RNA	Hyperglycaemia can strongly alter the epigenetic signatures in many types of human vascular cells providing persistent perturbations of protein-protein interactions both in micro- and macro-domains. The establishment of these epigenetic changes may precede cardiovascular (CV) complications and help us to predict vascular lesions in diabetic patients. Importantly, these epigenetic marks may be tra…	[Napoli, Claudio; Benincasa, Giuditta; Schiano, Concetta] Univ Campania Luigi Vanvitelli, Dept Adv Clin & Surg Sci, Pz Miraglia 2, I-80138 Naples, Italy; [Napoli, Claudio; Salvatore, Marco] IRCCS SDN, Via E Gianturco 113, I-80143 Naples, Italy	Universita della Campania Vanvitelli; IRCCS Istituto di Ricerca Diagnostica e Nucleare (SDN)	Benincasa, G (corresponding author), Univ Campania Luigi Vanvitelli, Dept Adv Clin & Surg Sci, Pz Miraglia 2, I-80138 Naples, Italy.	dr.benincasa.giuditta@gmail.com	61	50	51	OXFORD UNIV PRESS	OXFORD	EUR HEART J-CARD PHA	JUL	2020	6	10.1093/ehjcvp/pvz062	http://dx.doi.org/10.1093/ehjcvp/pvz062	Cardiac & Cardiovascular Systems; Pharmacology & Pharmacy	Science Citation Index Expanded (SCI-EXPANDED)	31665258	View Full Record in Web of Science
J	Lau, Wendy Ka-hoi; Chow, Alison Wai-ming; Au, Simon Chak-leung; Ko, Wing-hung	Differential Inhibitory Effects of CysLT1 Receptor Antagonists on P2Y6 Receptor-Mediated Signaling and Ion Transport in Human Bronchial Epithelia	PLOS ONE	English	Article		CL-SECRETION; EXTRACELLULAR NUCLEOTIDES; LEUKOTRIENE RECEPTOR; CHLORIDE SECRETION; P2 RECEPTORS; MAST-CELLS; CAMP; EPAC; ACTIVATION; RELEASE	Background: Cysteinyl leukotriene (CysLT) is one of the proinflammatory mediators released by the bronchi during inflammation. CysLTs exert their biological effects via specific G-protein-coupled receptors. CysLT(1) receptor antagonists are available for clinical use for the treatment of asthma. Recently, crosstalk between CysLT(1) and P2Y(6) receptors has been delineated. P2Y receptors are expre…	[Lau, Wendy Ka-hoi; Chow, Alison Wai-ming; Au, Simon Chak-leung; Ko, Wing-hung] Chinese Univ Hong Kong, Sch Biomed Sci, Hong Kong, Hong Kong, Peoples R China	Chinese University of Hong Kong	Lau, WKH (corresponding author), Chinese Univ Hong Kong, Sch Biomed Sci, Hong Kong, Hong Kong, Peoples R China.	whko@cuhk.edu.hk	50	18	23	PUBLIC LIBRARY SCIENCE	SAN FRANCISCO	PLOS ONE	JUL 22	2011	6	10.1371/journal.pone.0022363	http://dx.doi.org/10.1371/journal.pone.0022363	Multidisciplinary Sciences	Science Citation Index Expanded (SCI-EXPANDED)	21799837	View Full Record in Web of Science
J	Sun, Limei; Ling, Yuhang; Jiang, Jiahui; Wang, Danting; Wang, Junxia; Li, Jieyi; Wang, Xuedong; Wang, Huili	Differential mechanisms regarding triclosan vs. bisphenol A and fluorene-9-bisphenol induced zebrafish lipid-metabolism disorders by RNA-Seq	CHEMOSPHERE	English	Article	Triclosan; Bisphenol A; Lipid-metabolism disorder; Transcriptome sequencing; m(6)A RNA methylation	ENDOCRINE-DISRUPTING CHEMICALS; INSULIN-RESISTANCE; ADIPOSE-TISSUE; MESSENGER-RNA; EXPOSURE; N-6-METHYLADENOSINE; METHYLATION; EXPRESSION; HEALTH; INFLAMMATION	Exposure of endocrine disrupting chemicals (EDCs) is closely related to induction of obesity, nonalcoholic fatty liver disease (NAFLD) and other lipid-metabolism diseases. Herein, we compared the effects of three EDCs exposure (triclosan, bisphenol A and fluorene-9-bisphenol) on lipid metabolism in zebrflsh (Danio rerio). The differential lipid-metabolism disorders were analyzed in depth through …	[Sun, Limei; Ling, Yuhang; Jiang, Jiahui; Wang, Danting; Wang, Huili] Wenzhou Med Univ, Sch Lab Med & Life Sci, Key Lab Lab Med, Minist Educ, Wenzhou 325035, Peoples R China; [Wang, Junxia; Li, Jieyi; Wang, Xuedong] Suzhou Univ Sci & Technol, Natl & Local Joint Engn Lab Municipal Sewage Reso, Sch Environm Sci & Engn, Suzhou 215009, Peoples R China	Wenzhou Medical University; Suzhou University of Science & Technology	Wang, XD (corresponding author), Suzhou Univ Sci & Technol, Natl & Local Joint Engn Lab Municipal Sewage Reso, Sch Environm Sci & Engn, Suzhou 215009, Peoples R China.;Wang, HL (corresponding author), Zhejiang Prov Key Lab Med Genet, Key Lab Lab Med, Minist Educ, Wenzhou, Peoples R China.	zjuwxd@163.com; whuili@163.com	54	93	99	PERGAMON-ELSEVIER SCIENCE LTD	OXFORD	CHEMOSPHERE	JUL	2020	251	10.1016/j.chemosphere.2020.126318	http://dx.doi.org/10.1016/j.chemosphere.2020.126318	Environmental Sciences	Science Citation Index Expanded (SCI-EXPANDED)	32143076	View Full Record in Web of Science
J	Huo, Yan-Bing; Gao, Xiang; Peng, Qi; Nie, Qiang; Bi, Wei	Dihydroartemisinin alleviates AngII-induced vascular smooth muscle cell proliferation and inflammatory response by blocking the FTO/NR4A3 axis	INFLAMMATION RESEARCH	English	Article	VSMC; Dihydroartemisinin; AngII; FTO	NUCLEAR RECEPTOR; GENE-EXPRESSION; ENDOTHELIAL-CELLS; OXIDATIVE STRESS; FTO; ANGIOGENESIS; METABOLISM; APOPTOSIS; AUTOPHAGY; PATHWAY	Objective Inflammation and proliferation of vascular smooth muscle cells (VSMCs), induced by angiotensin II (AngII) and other growth factors, play important roles in the pathogenesis of hypertension, restenosis, and atherosclerosis. Dihydroartemisinin (DHA) exhibits broad protective effects. However, the effects of DHA on AngII-induced inflammation and proliferation of VSMCs remain unknown. Mater…	[Huo, Yan-Bing; Gao, Xiang; Bi, Wei] Hebei Med Univ, Hosp 2, Dept Vasc Surg, 215 Heping W Rd, Shijiazhuang 050000, Hebei, Peoples R China; [Huo, Yan-Bing; Nie, Qiang] Handan First Hosp, Dept Vasc Surg, Handan 056002, Hebei, Peoples R China; [Peng, Qi] Handan First Hosp, Dept Hematol, Handan 056002, Hebei, Peoples R China	Hebei Medical University	Bi, W (corresponding author), Hebei Med Univ, Hosp 2, Dept Vasc Surg, 215 Heping W Rd, Shijiazhuang 050000, Hebei, Peoples R China.	shi15369306566@126.com; yang2020y2020@163.com; zysjz1232020@126.com; Y18072728141@163.com; kuaileyebo@sina.com	49	16	17	SPRINGER BASEL AG	BASEL	INFLAMM RES	FEB	2022	71	10.1007/s00011-021-01533-3	http://dx.doi.org/10.1007/s00011-021-01533-3	Cell Biology; Immunology	Science Citation Index Expanded (SCI-EXPANDED)	35059772	View Full Record in Web of Science
J	Dunne, Amy E.; Kawamatawong, Theerasuk; Fenwick, Peter S.; Davies, Ceri M.; Tullett, Hannah; Barnes, Peter J.; Donnelly, Louise E.	Direct Inhibitory Effect of the PDE4 Inhibitor Roflumilast on Neutrophil Migration in Chronic Obstructive Pulmonary Disease	AMERICAN JOURNAL OF RESPIRATORY CELL AND MOLECULAR BIOLOGY	English	Article	neutrophil; chemotaxis; PDE4	PHOSPHODIESTERASE-4 INHIBITOR; CONTROLLED-TRIAL; INDUCED SPUTUM; INFLAMMATORY INDEXES; CHEMOTAXIS; CHEMOKINES; COPD; LEUKOCYTES; REDUCTION; RESPONSES	Neutrophilic inflammation is characteristic of chronic obstructive pulmonary disease (COPD); yet, there are no effective antiinflammatory therapies. The PDE4 inhibitor roflumilast is approved for use in COPD and suppresses sputum neutrophilia. The mechanism underlying this observation is unclear; therefore, this study addressed whether roflumilast directly affected neutrophil migration. Blood-der…	[Dunne, Amy E.; Kawamatawong, Theerasuk; Fenwick, Peter S.; Davies, Ceri M.; Tullett, Hannah; Barnes, Peter J.; Donnelly, Louise E.] Imperial Coll London, Airway Dis, Natl Heart & Lung Inst, Dovehouse St, London SW3 6LY, England	Imperial College London	Donnelly, LE (corresponding author), Imperial Coll London, Airway Dis, Natl Heart & Lung Inst, Dovehouse St, London SW3 6LY, England.	l.donnelly@imperial.ac.uk	47	29	35	AMER THORACIC SOC	NEW YORK	AM J RESP CELL MOL	APR	2019	60	10.1165/rcmb.2018-0065OC	http://dx.doi.org/10.1165/rcmb.2018-0065OC	Biochemistry & Molecular Biology; Cell Biology; Respiratory System	Science Citation Index Expanded (SCI-EXPANDED)	30395484	View Full Record in Web of Science
J	Ma, Yanru; Zhang, Xinyu; Xuan, Baoqin; Li, Danjie; Yin, Nan; Ning, Lijun; Zhou, Yi-Lu; Yan, Yuqing; Tong, Tianying; Zhu, Xiaoqiang; Huang, Xiaowen; Hu, Muni; Wang, Zhenhua; Cui, Zhe; Li, Huabin; Wang, Jiqiu; Fang, Jing-Yuan; Liu, Ruixin; Chen, Haoyan; Hong, Jie	Disruption of CerS6-mediated sphingolipid metabolism by FTO deficiency aggravates ulcerative colitis	GUT	English	Article	ulcerative colitis; macrophages; lipid metabolism; IBD basic research	CERAMIDE SYNTHASE 2; RNA; SPHINGOSINE-1-PHOSPHATE; MACROPHAGES; MICE	Background and aimsDeregulation of RNA N6-methyladenosine (m6A) modification in intestinal epithelial cells (IECs) influences intestinal immune cells and leads to intestinal inflammation. We studied the function of fat mass-and obesity-associated protein (FTO), one of the m6A demethylases, in patients with ulcerative colitis (UC).MethodsWe analysed colon tissues of Ftoflox/flox; Villin-cre mice a…	[Ma, Yanru; Zhang, Xinyu; Xuan, Baoqin; Ning, Lijun; Zhou, Yi-Lu; Yan, Yuqing; Tong, Tianying; Zhu, Xiaoqiang; Huang, Xiaowen; Hu, Muni; Wang, Zhenhua; Fang, Jing-Yuan; Chen, Haoyan; Hong, Jie] Shanghai Jiao Tong Univ, Sch Med, State Key Lab Syst Med Canc, Shanghai, Peoples R China; [Ma, Yanru; Zhang, Xinyu; Xuan, Baoqin; Ning, Lijun; Zhou, Yi-Lu; Yan, Yuqing; Tong, Tianying; Zhu, Xiaoqiang; Huan…	Shanghai Jiao Tong University; Shanghai Jiao Tong University; Shanghai Jiao Tong University; Shanghai Jiao Tong University; Shanghai Jiao Tong University; Shanghai Jiao Tong University; Shanghai Jiao Tong University; Shanghai Jiao Tong University; Shanghai Jiao Tong University; Chinese Academy of Sciences	Chen, HY; Hong, J (corresponding author), Shanghai Jiao Tong Univ, Sch Med, State Key Lab Syst Med Canc, Shanghai, Peoples R China.;Chen, HY; Hong, J (corresponding author), Shanghai Jiao Tong Univ, Key Lab Gastroenterol & Hepatol, Sch Med, Minist Hlth, Shanghai, Peoples R China.;Chen, HY; Hong, J (corresponding author), Shanghai Jiao Tong Univ, Sch Med, Div Gastroenterol & Hepatol, Shanghai, Peo…	xiner198287@163.com; haoyanchen@sjtu.edu.cn; jiehong97@sjtu.edu.cn	50	9	9	BMJ PUBLISHING GROUP	LONDON	GUT	FEB	2024	73	10.1136/gutjnl-2023-330009	http://dx.doi.org/10.1136/gutjnl-2023-330009	Gastroenterology & Hepatology	Science Citation Index Expanded (SCI-EXPANDED)	37734910	View Full Record in Web of Science
J	Nye, Taylor M.; Jacob, Kristin M.; Holley, Elena K.; Nevarez, Juan M.; Dawid, Suzanne; Simmons, Lyle A.; Watson, Michael E., Jr.	DNA methylation from a Type I restriction modification system influences gene expression and virulence in Streptococcus pyogenes	PLOS PATHOGENS	English	Article		GROUP-A STREPTOCOCCUS; FIBRONECTIN-BINDING PROTEIN; SINGLE-MOLECULE; GENOME SEQUENCE; MISMATCH REPAIR; MGA; INFECTION; PROMOTES; STRAIN; COLONIZATION	DNA methylation is pervasive across all domains of life. In bacteria, the presence of N6-methyladenosine (m6A) has been detected among diverse species, yet the contribution of m6A to the regulation of gene expression is unclear in many organisms. Here we investigated the impact of DNA methylation on gene expression and virulence within the human pathogen Streptococcus pyogenes, or Group A Strepto…	[Nye, Taylor M.; Simmons, Lyle A.] Univ Michigan, Dept Mol Cellular & Dev Biol, Ann Arbor, MI 48109 USA; [Jacob, Kristin M.; Holley, Elena K.; Nevarez, Juan M.; Dawid, Suzanne; Watson, Michael E., Jr.] Univ Michigan, Div Pediat Infect Dis, Dept Pediat & Communicable Dis, Ann Arbor, MI 48109 USA; [Jacob, Kristin M.] Michigan State Univ, Dept Microbiol & Mol Genet, E Lansing, MI 48824 USA	University of Michigan System; University of Michigan; University of Michigan System; University of Michigan; Michigan State University	Watson, ME (corresponding author), Univ Michigan, Div Pediat Infect Dis, Dept Pediat & Communicable Dis, Ann Arbor, MI 48109 USA.	mewats@med.umich.edu	86	37	44	PUBLIC LIBRARY SCIENCE	SAN FRANCISCO	PLOS PATHOG	JUN	2019	15	10.1371/journal.ppat.1007841	http://dx.doi.org/10.1371/journal.ppat.1007841	Microbiology; Parasitology; Virology	Science Citation Index Expanded (SCI-EXPANDED)	31206562	View Full Record in Web of Science
J	Wang, Zhenxiang; Chen, Hang; Peng, Limin; He, Yujuan; Wei, Jingjing; Zhang, Xiaonan	DNER and GNL2 are differentially m6A methylated in periodontitis in comparison with periodontal health revealed by m6A microarray of human gingival tissue and transcriptomic analysis	JOURNAL OF PERIODONTAL RESEARCH	English	Article	bioinformatics; epigenetics; m6A; MeRIP; microarray; periodontitis	RNA MODIFICATIONS; INTERFERON-GAMMA; NOTCH LIGAND; EXPRESSION; ASSOCIATION; CYTOKINES; CELLS	ObjectiveThis study aims to investigate the differences in the epigenomic patterns of N6-methyladenosine (m6A) methylation in gingival tissues between patients with periodontitis (PD) and healthy controls, identifying potential biomarkers. BackgroundAs a multifactorial disease, PD involves multiple genetic and environmental effects. The m6A modification is the most prevalent internal mRNA modific…	[Wang, Zhenxiang; Chen, Hang; Peng, Limin; Wei, Jingjing; Zhang, Xiaonan] Chongqing Med Univ, Coll Stomatol, Chongqing, Peoples R China; [Wang, Zhenxiang; Chen, Hang; Peng, Limin; Wei, Jingjing; Zhang, Xiaonan] Chongqing Municipal Key Lab Oral Biomed Engn Highe, Chongqing, Peoples R China; [Wang, Zhenxiang; Chen, Hang; Peng, Limin; Wei, Jingjing; Zhang, Xiaonan] Chongqing Key Lab Oral Dis & Biome…	Chongqing Medical University; Chongqing Medical University; Chongqing Medical University	Zhang, XA (corresponding author), Chongqing Med Univ, Coll Stomatol, 426 Songshibei Rd, Chongqing, Peoples R China.	500133@hospital.cqmu.edu.cn	56	5	6	WILEY	HOBOKEN	J PERIODONTAL RES	JUN	2023	58	10.1111/jre.13117	http://dx.doi.org/10.1111/jre.13117	Dentistry, Oral Surgery & Medicine	Science Citation Index Expanded (SCI-EXPANDED)	36941720	View Full Record in Web of Science
J	Xiang, Song; Wang, Yihua; Lei, Dengliang; Luo, Yunhai; Peng, Dadi; Zong, Kezhen; Liu, Yanyao; Huang, Zuotian; Mo, Shaojiang; Pu, Xingyu; Zheng, Jinli; Wu, Zhongjun	Donor graft METTL3 gene transfer ameliorates rat liver transplantation ischemia-reperfusion injury by enhancing HO-1 expression in an m6A-dependent manner	CLINICAL IMMUNOLOGY	English	Article	Liver transplantation; Ischemia-reperfusion injury; METTL3; N 6-methyladenosine; HO-1	MESSENGER-RNA; M(6)A MODIFICATION; INNATE; N-6-METHYLADENOSINE; INTERLEUKIN-10; MECHANISMS; CELLS	Ischemia-reperfusion injury (IRI) is one of the most common complications in liver transplantation. METTL3 regulates inflammation and cellular stress response by modulating RNA m6A modification level. Here, the study aimed to investigate the role and mechanism of METTL3 in IRI after rat orthotopic liver transplantation. The total RNA m6A modification and METTL3 expression level was consistently d…	[Xiang, Song; Wang, Yihua; Lei, Dengliang; Luo, Yunhai; Peng, Dadi; Zong, Kezhen; Liu, Yanyao; Wu, Zhongjun] Chongqing Med Univ, Dept Hepatobiliary Surg, Affiliated Hosp 1, Chongqing, Peoples R China; [Huang, Zuotian; Mo, Shaojiang] Chongqing Univ, Canc Hosp, Chongqing, Peoples R China; [Pu, Xingyu; Zheng, Jinli] Sichuan Univ, Liver Transplantat Ctr, Dept Liver Surg, West China Hosp, Chengdu, Sic…	Chongqing Medical University; Chongqing University; Sichuan University; Chongqing Medical University	Wu, ZJ (corresponding author), Chongqing Med Univ, Dept Hepatobiliary Surg, Affiliated Hosp 1, Chongqing 400016, Peoples R China.	wzjtcy@126.com	62	4	4	ACADEMIC PRESS INC ELSEVIER SCIENCE	SAN DIEGO	CLIN IMMUNOL	JUN	2023	251	10.1016/j.clim.2023.109325	http://dx.doi.org/10.1016/j.clim.2023.109325	Immunology	Science Citation Index Expanded (SCI-EXPANDED)	37030526	View Full Record in Web of Science
J	Li, Xinzhi; Yang, Ying; Chen, Zheng	Downregulation of the m6A reader protein YTHDC1 leads to islet β-cell failure and diabetes	METABOLISM-CLINICAL AND EXPERIMENTAL	English	Article	Islet beta cells; YTHDC1; Hyperglycemia; Insulin secretion; Diabetes	B-INDUCING KINASE; INFLAMMATION	N6-methyladenosine (m(6)A) methyltransferase writer proteins (METTL3/METTL14) have been shown to regulate beta-cell function and diabetes. However, whether and which m(6)A reader proteins regulate beta-cell function and the pathogenesis of diabetes are largely unknown. In this study, we showed that YTHDC1 (YTH domain-containing protein 1), a key m(6)A nuclear reader protein, plays an essential ro…	[Li, Xinzhi; Yang, Ying; Chen, Zheng] Harbin Inst Technol, HIT Ctr Life Sci, Sch Life Sci & Technol, Harbin 150001, Peoples R China	Harbin Institute of Technology	Chen, Z (corresponding author), Harbin Inst Technol, HIT Ctr Life Sci, Sch Life Sci & Technol, Harbin 150001, Peoples R China.	chenzheng@hit.edu.cn	20	16	16	W B SAUNDERS CO-ELSEVIER INC	PHILADELPHIA	METABOLISM	JAN	2023	138	10.1016/j.metabol.2022.155339	http://dx.doi.org/10.1016/j.metabol.2022.155339	Endocrinology & Metabolism	Science Citation Index Expanded (SCI-EXPANDED)	36302453	View Full Record in Web of Science
J	Wu, Yinghui; Li, Hao; Miao, Yueyue; Peng, Jian; Wei, Hongkui	Effects of Methionine Restriction from Different Sources on Sperm Quality in Aging Mice	NUTRIENTS	English	Article	aging mice; methionine hydroxy analog; methionine restriction; methylation; sperm quality; spermidine	SEMEN QUALITY; DNA; AGE	Decreased sperm quality causing poor pregnancy outcomes in aging males is a common problem. The aim of this study was to investigate the ameliorative effect of methionine restriction on sperm quality in aging mice, using methionine or 2-hydroxy-4-(methylthio)butanoate (HMTBA) as the methionine source, with a view to providing nutritional strategies to mitigate the decline in sperm quality in agin…	[Wu, Yinghui; Li, Hao; Miao, Yueyue; Peng, Jian; Wei, Hongkui] Huazhong Agr Univ, Coll Anim Sci & Technol, Dept Anim Nutr & Feed Sci, Wuhan 430070, Peoples R China; [Peng, Jian; Wei, Hongkui] Cooperat Innovat Ctr Sustainable Pig Prod, Wuhan 430070, Peoples R China; [Peng, Jian; Wei, Hongkui] Frontiers Sci Ctr Anim Breeding & Sustainable Prod, Wuhan 430070, Peoples R China	Huazhong Agricultural University	Wei, HK (corresponding author), Huazhong Agr Univ, Coll Anim Sci & Technol, Dept Anim Nutr & Feed Sci, Wuhan 430070, Peoples R China.;Wei, HK (corresponding author), Cooperat Innovat Ctr Sustainable Pig Prod, Wuhan 430070, Peoples R China.;Wei, HK (corresponding author), Frontiers Sci Ctr Anim Breeding & Sustainable Prod, Wuhan 430070, Peoples R China.	wuyinghui@mail.hzau.edu.cn; miaoyueyue@mail.hzau.edu.cn; pengjian@mail.hzau.edu.cn; weihongkui@mail.hzau.edu.cn	40	1	1	MDPI	BASEL	NUTRIENTS	NOV	2023	15	10.3390/nu15224782	http://dx.doi.org/10.3390/nu15224782	Nutrition & Dietetics	Science Citation Index Expanded (SCI-EXPANDED)	38004176	View Full Record in Web of Science
J	Xu, Zujie; Qin, Ying; Lv, Binbin; Tian, Zhenjun; Zhang, Bing	Effects of Moderate-Intensity Continuous Training and High-Intensity Interval Training on Testicular Oxidative Stress, Apoptosis and m6A Methylation in Obese Male Mice	ANTIOXIDANTS	English	Article	obesity; MICT; HIIT; testicular; oxidative stress; apoptosis; N6-methyladenosine (m6A) methylation	HIGH-FAT DIET; EXERCISE; TESTES; SPERMATOGENESIS; INFLAMMATION; ANTIOXIDANT; MECHANISMS; FERTILITY; HEALTH	Exercise is an effective way to improve reproductive function in obese males. Oxidative stress and apoptosis are important pathological factors of obesity-related male infertility. Accumulating studies have demonstrated that N6-methyladenosine (m6A) methylation is associated with obesity and testicular reproductive function. Our study aimed to investigate and compare the effect of 8 weeks of mode…	[Xu, Zujie; Qin, Ying; Lv, Binbin; Zhang, Bing] Tsinghua Univ, Div Sports Sci & Phys Educ, Beijing 100084, Peoples R China; [Tian, Zhenjun] Shaanxi Normal Univ, Coll Phys Educ, Inst Sports Biol, Xian 710119, Peoples R China	Tsinghua University; Shaanxi Normal University	Zhang, B (corresponding author), Tsinghua Univ, Div Sports Sci & Phys Educ, Beijing 100084, Peoples R China.;Tian, ZJ (corresponding author), Shaanxi Normal Univ, Coll Phys Educ, Inst Sports Biol, Xian 710119, Peoples R China.	tianzhj@snnu.edu.cn; bzhang@mail.tsinghua.edu.cn	42	5	7	MDPI	BASEL	ANTIOXIDANTS-BASEL	OCT	2022	11	10.3390/antiox11101874	http://dx.doi.org/10.3390/antiox11101874	Biochemistry & Molecular Biology; Chemistry, Medicinal; Food Science & Technology	Science Citation Index Expanded (SCI-EXPANDED)	36290597	View Full Record in Web of Science
J	Song, Bimei; Zeng, Yue; Cao, Yanqing; Zhang, Jiamin; Xu, Chao; Pan, Yaping; Zhao, Xida; Liu, Jingbo	Emerging role of METTL3 in inflammatory diseases: mechanisms and therapeutic applications	FRONTIERS IN IMMUNOLOGY	English	Review	m6A modification; METTL3; inflammation; inflammatory diseases; immune cell; therapy	MESSENGER-RNA METHYLATION; NUCLEAR-RNA; MACROPHAGE POLARIZATION; GENE-EXPRESSION; URIC-ACID; CELLS; HOMEOSTASIS; DISTINCT; SEPSIS; TISSUE	Despite improvements in modern medical therapies, inflammatory diseases, such as atherosclerosis, diabetes, non-alcoholic fatty liver, chronic kidney diseases, and autoimmune diseases have high incidence rates, still threaten human health, and represent a huge financial burden. N6-methyladenosine (m6A) modification of RNA contributes to the pathogenesis of various diseases. As the most widely dis…	[Song, Bimei; Zeng, Yue; Cao, Yanqing; Zhang, Jiamin; Xu, Chao; Pan, Yaping; Zhao, Xida; Liu, Jingbo] China Med Univ, Sch Stomatol, Dept Periodont, Shenyang, Peoples R China	China Medical University	Liu, JB (corresponding author), China Med Univ, Sch Stomatol, Dept Periodont, Shenyang, Peoples R China.	jingboliu_cmu@163.com	153	10	11	FRONTIERS MEDIA SA	LAUSANNE	FRONT IMMUNOL	AUG 21	2023	14	10.3389/fimmu.2023.1221609	http://dx.doi.org/10.3389/fimmu.2023.1221609	Immunology	Science Citation Index Expanded (SCI-EXPANDED)	37671161	View Full Record in Web of Science
J	Xu, Limin; Zhou, Lingyan; Yan, Chenxin; Li, Liqin	Emerging role of N6-methyladenosine RNA methylation in lung diseases	EXPERIMENTAL BIOLOGY AND MEDICINE	English	Review	N6-methyladenosine; asthma; chronic obstructive pulmonary disease; idiopathic pulmonary fibrosis; lung cancer	MESSENGER-RNA; NUCLEAR-RNA; CANCER PROGRESSION; M(6)A; CELLS; PROLIFERATION; TRANSLATION; DEMETHYLASE; EXPRESSION; METASTASIS	In recent years, with the increase of air pollution, smoking, aging, and respiratory infection, the incidence rate and mortality of lung diseases are increasing annually, which has become a major hazard to human health. N6-methyladenosine (m(6)A) RNA methylation is the most abundant modifications in eukaryotes, and such modified RNA can be specifically recognized and combined by m(6)A recognition…	[Xu, Limin; Zhou, Lingyan; Li, Liqin] Huzhou Normal Univ, Affiliated Hosp, Huzhou Cent Hosp, Huzhou 313000, Peoples R China; [Xu, Limin; Zhou, Lingyan; Li, Liqin] Zhejiang Univ, Huzhou Hosp, Huzhou 313000, Peoples R China; [Yan, Chenxin] Zhejiang Shuren Univ, Shulan Int Med Coll, Hangzhou 310015, Peoples R China	Huzhou University; Zhejiang University; Zhejiang Shuren University	Li, LQ (corresponding author), Huzhou Normal Univ, Affiliated Hosp, Huzhou Cent Hosp, Huzhou 313000, Peoples R China.;Li, LQ (corresponding author), Zhejiang Univ, Huzhou Hosp, Huzhou 313000, Peoples R China.	liliqin@hzhospital.com	98	9	10	SAGE PUBLICATIONS LTD	LONDON	EXP BIOL MED	OCT	2022	247	10.1177/15353702221128564	http://dx.doi.org/10.1177/15353702221128564	Medicine, Research & Experimental	Science Citation Index Expanded (SCI-EXPANDED)	36278325	View Full Record in Web of Science
J	Xu, Zujie; Lv, Binbin; Qin, Ying; Zhang, Bing	Emerging Roles and Mechanism of m6A Methylation in Cardiometabolic Diseases	CELLS	English	Review	N6-Methyladenosine (m6A); cardiometabolic diseases (CMDs); RNA methylation	MESSENGER-RNA; OBESITY CARDIOMYOPATHY; NUCLEAR-RNA; N6-METHYLADENOSINE; AUTOPHAGY; ALKBH5; PROLIFERATION; INFLAMMATION; TRANSLATION; EPIGENETICS	Cardiometabolic diseases (CMDs) are currently the leading cause of death and disability worldwide, and their underlying regulatory mechanisms remain largely unknown. N6-methyladenosine (m6A) methylation, the most common and abundant epigenetic modification of eukaryotic mRNA, is regulated by m6A methyltransferase, demethylase, and the m6A binding protein, which affect the transcription, cleavage,…	[Xu, Zujie; Lv, Binbin; Qin, Ying; Zhang, Bing] Tsinghua Univ, Div Sports Sci & Phys Educ, Beijing 100084, Peoples R China	Tsinghua University	Zhang, B (corresponding author), Tsinghua Univ, Div Sports Sci & Phys Educ, Beijing 100084, Peoples R China.	xuzj20@mails.tsinghua.edu.cn; lbb20@mails.tsinghua.edu.cn; qin-y20@mails.tsinghua.edu.cn; bzhang@mail.tsinghua.edu.cn	101	27	29	MDPI	BASEL	CELLS-BASEL	APR	2022	11	10.3390/cells11071101	http://dx.doi.org/10.3390/cells11071101	Cell Biology	Science Citation Index Expanded (SCI-EXPANDED)	35406663	View Full Record in Web of Science
J	Wang, Bu; Liu, Yuan; Jiang, Rui; Liu, Zhiliang; Gao, Haiyun; Chen, Fenqiao; Mei, Jianqiang	Emodin relieves the inflammation and pyroptosis of lipopolysaccharide-treated 1321N1 cells by regulating methyltransferase-like 3-mediated NLR family pyrin domain containing 3 expression	BIOENGINEERED	English	Article	Sepsis; emodin; pyroptosis; inflammation; NLRP3	LUNG INJURY; GLYCOCALYX; N6-METHYLADENINE; INFLAMMASOMES; INVOLVEMENT; DYSFUNCTION; INHIBITION; TOXICITY; ADHESION	Sepsis brain injury (SBI) is a major cause of death in critically ill patients. The present study aimed to investigate the role of emodin in SBI development. Human astrocyte 1321N1 cells were stimulated with 100 ng/mL lipopolysaccharide (LPS) to establish an SBI model in vitro. Flow cytometry was performed to measure the cell pyroptosis. The protein expression levels of syndecan-1 (SDC-1), NLR fa…	[Wang, Bu; Gao, Haiyun; Chen, Fenqiao; Mei, Jianqiang] Hebei Tradit Chinese Med Univ, Dept Emergency, Affiliated Hosp 1, 389 East Zhongshan Rd, Shijiazhuang 050000, Hebei, Peoples R China; [Wang, Bu] Hebei Med Univ, Dept Emergency Crit Care Med, East Branch, Hosp 2, Shijiazhuang, Hebei, Peoples R China; [Liu, Yuan] Hebei Tradit Chinese Med Univ, Dept Crit Care Med, Affiliated Hosp 1, Shijiazhuang…	Hebei Medical University; Hebei Medical University	Mei, JQ (corresponding author), Hebei Tradit Chinese Med Univ, Dept Emergency, Affiliated Hosp 1, 389 East Zhongshan Rd, Shijiazhuang 050000, Hebei, Peoples R China.	drmeijianqiang@hotmail.com	42	25	24	TAYLOR & FRANCIS INC	PHILADELPHIA	BIOENGINEERED	MAR 1	2022	13	10.1080/21655979.2022.2045836	http://dx.doi.org/10.1080/21655979.2022.2045836	Biotechnology & Applied Microbiology	Science Citation Index Expanded (SCI-EXPANDED)	35246004	View Full Record in Web of Science
J	Cao, Yingying; Wang, Zhenhua; Yan, Yuqing; Ji, Linhua; He, Jie; Xuan, Baoqin; Shen, Chaoqin; Ma, Yanru; Jiang, Shanshan; Ma, Dan; Tong, Tianying; Zhang, Xinyu; Gao, Ziyun; Zhu, Xiaoqiang; Fang, Jing-Yuan; Chen, Haoyan; Hong, Jie	Enterotoxigenic Bacteroides fragilis Promotes Intestinal Inflammation and Malignancy by Inhibiting Exosome-Packaged miR-149-3p	GASTROENTEROLOGY	English	Article	Exosome; Intestinal Inflammation; Carcinogenesis; Th17 Cells; PHF5A	IMMUNE-RESPONSES; CELL RESPONSE; MICRORNAS; TUMORIGENESIS; BIOGENESIS; SUPPRESSES; ACTIVATION; EXPRESSION; MICROBIOTA; DISEASE	BACKGROUND & AIMS: Enterotoxigenic Bacteroides fragilis (ETBF) is strongly associated with the occurrence of inflammatory bowel disease (IBD), colitis-associated colorectal cancer, and colorectal cancer (CRC). However, the mechanism of ETBF-induced intestinal inflammation and tumorigenesis remains unclear. METHODS: microRNA sequencing was used to detect the differentially expressed microRNAs in b…	[Cao, Yingying; Wang, Zhenhua; Yan, Yuqing; Xuan, Baoqin; Shen, Chaoqin; Ma, Yanru; Jiang, Shanshan; Ma, Dan; Tong, Tianying; Zhang, Xinyu; Gao, Ziyun; Zhu, Xiaoqiang; Fang, Jing-Yuan; Chen, Haoyan; Hong, Jie] Shanghai Jiao Tong Univ, State Key Lab Oncogenes & Related Genes, Shanghai, Peoples R China; [Cao, Yingying; Wang, Zhenhua; Yan, Yuqing; Shen, Chaoqin; Ma, Yanru; Jiang, Shanshan; Ma, Dan; …	Shanghai Jiao Tong University; Shanghai Jiao Tong University; Shanghai Jiao Tong University; Shanghai Jiao Tong University; Shanghai Jiao Tong University; Shanghai Jiao Tong University; Guangzhou Medical University; Guangzhou Medical University; Shanghai Jiao Tong University	Chen, HY; Hong, J (corresponding author), Shanghai Jiao Tong Univ, State Key Lab Oncogenes & Related Genes, Shanghai, Peoples R China.;Chen, HY; Hong, J (corresponding author), Shanghai Jiao Tong Univ, Minist Hlth, Key Lab Gastroenterol & Hepatol, Shanghai, Peoples R China.;Chen, HY; Hong, J (corresponding author), Shanghai Jiao Tong Univ, Div Gastroenterol & Hepatol, Shanghai, Peoples R China.;C…	haoyanchen@sjtu.edu.cn; jiehong97@sjtu.edu.cn	53	138	147	W B SAUNDERS CO-ELSEVIER INC	PHILADELPHIA	GASTROENTEROLOGY	NOV	2021	161	10.1053/j.gastro.2021.08.003	http://dx.doi.org/10.1053/j.gastro.2021.08.003	Gastroenterology & Hepatology	Science Citation Index Expanded (SCI-EXPANDED)	34371001	View Full Record in Web of Science
J	Grosjean, H; Auxilien, S; Constantinesco, F; Simon, C; Corda, Y; Becker, HF; Foiret, D; Morin, A; Jin, YX; Fournier, M; Fourrey, JL	Enzymatic conversion of adenosine to inosine and to N-1-methylinosine in transfer RNAs: A review	BIOCHIMIE	English	Review	RNA; inosine; methylation; editing; deaminase; methyltransferase; autoantibodies; polymyositis	DOUBLE-STRANDED-RNA; B MESSENGER-RNA; UNWINDING MODIFYING ACTIVITY; ALANINE TRANSFER-RNA; AMP-DEAMINASE; IN-VITRO; CYTIDINE DEAMINASE; WOBBLE POSITION; XENOPUS-OOCYTES; CATALYTIC SUBUNIT	Inosine (6-deaminated adenosine) is a characteristic modified nucleoside that is found at the first anticodon position (position 34) of several tRNAs of eukaryotic and eubacterial origins, while N-1-methylinosine is found exclusively at position 37 (3' adjacent to the anticodon) of eukaryotic tRNA(Ala) and at position 57 (in the middle of the Psi loop) of several tRNAs from halophilic and thermop…	INST CHIM SUBST NAT, F-91198 GIF SUR YVETTE, FRANCE		CNRS, LAB ENZYMOL & BIOCHIM STRUCT, 1 AVE TERRASSE, F-91198 GIF SUR YVETTE, FRANCE.		101	89	100	ELSEVIER FRANCE-EDITIONS SCIENTIFIQUES MEDICALES ELSEVIER	ISSY-LES-MOULINEAUX	BIOCHIMIE		1996	78	10.1016/0300-9084(96)84755-9	http://dx.doi.org/10.1016/0300-9084(96)84755-9	Biochemistry & Molecular Biology	Science Citation Index Expanded (SCI-EXPANDED)	8915538	View Full Record in Web of Science
J	Zeng, Fanning; Cao, Jun; Hong, Zexuan; Lu, Yitian; Qin, Zaisheng; Tao, Tao	Epigenetic combined with transcriptomic analysis of the m6A methylome after spared nerve injury-induced neuropathic pain in mice	NEURAL REGENERATION RESEARCH	English	Article		SPINAL-CORD; NUCLEOTIDE-SEQUENCES; MECHANISMS; TRANSLATION; EXPRESSION; BURDEN; HISAT; CAMP	Epigenetic changes in the spinal cord play a key role in the initiation and maintenance of nerve injury-induced neuropathic pain. N6-methyladenosine (m6A) is one of the most abundant internal RNA modifications and plays an essential function in gene regulation in many diseases. However, the global m6A modification status of mRNA in the spinal cord at different stages after neuropathic pain is unk…	[Zeng, Fanning; Cao, Jun; Hong, Zexuan; Lu, Yitian; Qin, Zaisheng] Southern Med Univ, Nanfang Hosp, Dept Anesthesiol, Guangzhou, Guangdong, Peoples R China; [Zeng, Fanning; Tao, Tao] Cent Peoples Hosp Zhanjiang, Dept Anesthesiol, Zhanjiang, Guangdong, Peoples R China; [Cao, Jun] Southern Med Univ, Shenzhen Matern & Child Healthcare Hosp, Dept Anesthesiol, Shenzhen, Guangdong, Peoples R China	Southern Medical University - China; Shenzhen Maternity & Child Healthcare Hospital; Southern Medical University - China	Qin, ZS (corresponding author), Southern Med Univ, Nanfang Hosp, Dept Anesthesiol, Guangzhou, Guangdong, Peoples R China.;Tao, T (corresponding author), Cent Peoples Hosp Zhanjiang, Dept Anesthesiol, Zhanjiang, Guangdong, Peoples R China.	mzkqzs@smu.edu.cn; taotaomzk@smu.edu.cn	67	3	3	WOLTERS KLUWER MEDKNOW PUBLICATIONS	MUMBAI	NEURAL REGEN RES	NOV	2023	18	10.4103/1673-5374.371374	http://dx.doi.org/10.4103/1673-5374.371374	Cell Biology; Neurosciences	Science Citation Index Expanded (SCI-EXPANDED)	37282488	View Full Record in Web of Science
J	Zima, Laura; West, Rebecca; Smolen, Paul; Kobori, Nobuhide; Hergenroeder, Georgene; Choi, HuiMahn A.; Moore, Anthony N.; Redell, John B.; Dash, Pramod K.	Epigenetic Modifications and Their Potential Contribution to Traumatic Brain Injury Pathobiology and Outcome	JOURNAL OF NEUROTRAUMA	English	Review	epigenetic methylation; methionine cycle; methyl donor; methyl transferase; neurodegenerative diseases; TBI outcome	CYSTATHIONINE-BETA-SYNTHASE; BDNF GENE-TRANSCRIPTION; HISTONE H3 ACETYLATION; DNA METHYLATION; M(6)A METHYLTRANSFERASE; N6-METHYLADENOSINE RNA; MESSENGER-RNA; HEAVY STRAND; COMPLEX; IDENTIFICATION	Epigenetic information is not permanently encoded in the DNA sequence, but rather consists of reversible, heritable modifications that regulate the gene expression profile of a cell. Epigenetic modifications can result in cellular changes that can be long lasting and include DNA methylation, histone methylation, histone acetylation, and RNA methylation. As epigenetic modifications are reversible,…	[Zima, Laura; Hergenroeder, Georgene; Choi, HuiMahn A.] Univ Texas Hlth Sci Ctr, McGovern Med Sch, Dept Neurol Surg, Houston, TX USA; [West, Rebecca; Smolen, Paul; Kobori, Nobuhide; Moore, Anthony N.; Redell, John B.; Dash, Pramod K.] Univ Texas Hlth Sci Ctr, McGovern Med Sch, Dept Neurobiol & Anat, Houston, TX USA; [Dash, Pramod K.] UTHealth, McGovern Med Sch, Dept Neurobiol & Anat, 6431 Fannin …	University of Texas System; University of Texas Health Science Center Houston; University of Texas System; University of Texas Health Science Center Houston; Baylor College of Medicine; University of Texas System; University of Texas Health Science Center Houston	Dash, PK (corresponding author), UTHealth, McGovern Med Sch, Dept Neurobiol & Anat, 6431 Fannin St,MSB 7-046, Houston, TX 77030 USA.	P.Dash@uth.tmc.edu	96	5	5	MARY ANN LIEBERT, INC	NEW ROCHELLE	J NEUROTRAUM	OCT 1	2022	39	10.1089/neu.2022.0128	http://dx.doi.org/10.1089/neu.2022.0128	Critical Care Medicine; Clinical Neurology; Neurosciences	Science Citation Index Expanded (SCI-EXPANDED)	35481812	View Full Record in Web of Science
J	Xue, Taixiong; Qiu, Xingyu; Liu, Hongyao; Gan, Cailing; Tan, Zui; Xie, Yuting; Wang, Yuxi; Ye, Tinghong	Epigenetic regulation in fibrosis progress	PHARMACOLOGICAL RESEARCH	English	Article	Fibrosis; Epigenetic regulation; DNA methylation; Histone modification; Noncoding RNAs (ncRNAs); N6-methyladenosine modification (m6A)	STELLATE CELL ACTIVATION; HISTONE DEACETYLASE INHIBITOR; ATTENUATES RENAL FIBROSIS; CARDIAC FIBROBLAST PROLIFERATION; TO-MESENCHYMAL TRANSITION; INDUCED LIVER FIBROSIS; ZESTE HOMOLOG 2; DNA METHYLATION; MYOFIBROBLAST DIFFERENTIATION; ACETYLTRANSFERASE P300	Fibrosis, a common process of chronic inflammatory diseases, is defined as a repair response disorder when organs undergo continuous damage, ultimately leading to scar formation and functional failure. Around the world, fibrotic diseases cause high mortality, unfortunately, with limited treatment means in clinical practice. With the development and application of deep sequencing technology, compr…	[Xue, Taixiong; Qiu, Xingyu; Liu, Hongyao; Gan, Cailing; Tan, Zui; Xie, Yuting; Wang, Yuxi; Ye, Tinghong] Sichuan Univ, Sichuan Univ Univ Oxford Huaxi Joint Ctr Gastroin, West China Hosp,State Key Lab Biotherapy, Dept Gastroenterol & Hepatol,Frontiers Sci Ctr Di, Chengdu 610041, Sichuan, Peoples R China; [Wang, Yuxi] Sichuan Univ, Targeted Tracer Res & Dev Lab, Inst Resp Hlth, Frontiers Sci Ctr D…	Sichuan University; Sichuan University; Sichuan University	Wang, YX; Ye, TH (corresponding author), Sichuan Univ, Sichuan Univ Univ Oxford Huaxi Joint Ctr Gastroin, West China Hosp,State Key Lab Biotherapy, Dept Gastroenterol & Hepatol,Frontiers Sci Ctr Di, Chengdu 610041, Sichuan, Peoples R China.	yuxiwang@scu.edu.cn; yeth1309@scu.edu.cn	271	46	52	ACADEMIC PRESS LTD- ELSEVIER SCIENCE LTD	LONDON	PHARMACOL RES	NOV	2021	173	10.1016/j.phrs.2021.105910	http://dx.doi.org/10.1016/j.phrs.2021.105910	Pharmacology & Pharmacy	Science Citation Index Expanded (SCI-EXPANDED)	34562602	View Full Record in Web of Science
J	Komal, Sumra; Han, Sheng-Na; Cui, Liu-Gen; Zhai, Miao-Miao; Zhou, Yue-Jiao; Wang, Pei; Shakeel, Muhammad; Zhang, Li-Rong	Epigenetic Regulation of Macrophage Polarization in Cardiovascular Diseases	PHARMACEUTICALS	English	Review	epigenetics; macrophage polarization; N6-methyladenosine; non-coding RNAs; cardiovascular diseases	MYOCARDIAL-ISCHEMIA; GENE-EXPRESSION; ATHEROSCLEROSIS; METHYLATION; INFLAMMATION; ACTIVATION; INJURY; MICRORNA-155; DYSFUNCTION; MECHANISMS	Cardiovascular diseases (CVDs) are the leading cause of hospitalization and death worldwide, especially in developing countries. The increased prevalence rate and mortality due to CVDs, despite the development of several approaches for prevention and treatment, are alarming trends in global health. Chronic inflammation and macrophage infiltration are key regulators of the initiation and progressi…	[Komal, Sumra; Han, Sheng-Na; Cui, Liu-Gen; Zhai, Miao-Miao; Zhou, Yue-Jiao; Wang, Pei; Zhang, Li-Rong] Zhengzhou Univ, Sch Basic Med Sci, Dept Pharmacol, Zhengzhou 450001, Peoples R China; [Shakeel, Muhammad] Univ Karachi, Jamil ur Rahman Ctr Genome Res, Dr Panjwani Ctr Mol Med & Drug Res, Int Ctr Chem & Biol Sci, Karachi 75270, Pakistan	Zhengzhou University; University of Karachi	Zhang, LR (corresponding author), Zhengzhou Univ, Sch Basic Med Sci, Dept Pharmacol, Zhengzhou 450001, Peoples R China.;Shakeel, M (corresponding author), Univ Karachi, Jamil ur Rahman Ctr Genome Res, Dr Panjwani Ctr Mol Med & Drug Res, Int Ctr Chem & Biol Sci, Karachi 75270, Pakistan.	mshakeel_211@yahoo.com; zhanglirongzzu@126.com	134	8	8	MDPI	BASEL	PHARMACEUTICALS-BASE	FEB	2023	16	10.3390/ph16020141	http://dx.doi.org/10.3390/ph16020141	Chemistry, Medicinal; Pharmacology & Pharmacy	Science Citation Index Expanded (SCI-EXPANDED)	37259293	View Full Record in Web of Science
J	Yang, Shu; Zhou, Xuanping; Jia, Zhen; Zhang, Mali; Yuan, Minghao; Zhou, Yizhao; Wang, Jing; Xia, Duo	Epigenetic regulatory mechanism of ADAMTS12 expression in osteoarthritis	MOLECULAR MEDICINE	English	Article	Osteoarthritis; Inflammation; ADAMTS12; STAT1; METTL3; IGF2BP2	TRANSCRIPTION; CELLS	BackgroundOsteoarthritis (OA) is a degenerative joint disease with lacking effective prevention targets. A disintegrin and metalloproteinase with thrombospondin motifs 12 (ADAMTS12) is a member of the ADAMTS family and is upregulated in OA pathologic tissues with no fully understood molecular mechanisms.MethodsThe anterior cruciate ligament transection (ACL-T) method was used to establish rat OA …	[Yang, Shu; Jia, Zhen; Zhang, Mali; Yuan, Minghao; Zhou, Yizhao; Wang, Jing; Xia, Duo] Hunan Normal Univ, Hunan Prov Peoples Hosp, Dept Orthoped, Affiliated Hosp 1, 61Jiefang West Rd, Changsha 410005, Hunan, Peoples R China; [Zhou, Xuanping] Hunan Normal Univ, Hunan Prov Peoples Hosp, Dept Orthoped, Affiliated Hosp 1, Changsha 410005, Hunan, Peoples R China	Hunan Normal University; Hunan Normal University	Wang, J; Xia, D (corresponding author), Hunan Normal Univ, Hunan Prov Peoples Hosp, Dept Orthoped, Affiliated Hosp 1, 61Jiefang West Rd, Changsha 410005, Hunan, Peoples R China.	wangj0405@163.com; xiaduo83@163.com	45	4	4	SPRINGER	NEW YORK	MOL MED	JUL 3	2023	29	10.1186/s10020-023-00661-2	http://dx.doi.org/10.1186/s10020-023-00661-2	Biochemistry & Molecular Biology; Cell Biology; Medicine, Research & Experimental	Science Citation Index Expanded (SCI-EXPANDED)	37400752	View Full Record in Web of Science
J	Mongelli, Alessia; Atlante, Sandra; Bachetti, Tiziana; Martelli, Fabio; Farsetti, Antonella; Gaetano, Carlo	Epigenetic Signaling and RNA Regulation in Cardiovascular Diseases	INTERNATIONAL JOURNAL OF MOLECULAR SCIENCES	English	Review	epigenetics; nucleic acids; RNA; DNA; cardiovascular disease; chronic disease; aging; metabolism	SMOOTH-MUSCLE-CELLS; MESSENGER-RNA; N-6-METHYLADENOSINE RNA; METHYLATION; M(6)A; 5-METHYLCYTOSINE; INJURY; GENE; IDENTIFICATION; INFLAMMATION	RNA epigenetics is perhaps the most recent field of interest for translational epigeneticists. RNA modifications create such an extensive network of epigenetically driven combinations whose role in physiology and pathophysiology is still far from being elucidated. Not surprisingly, some of the players determining changes in RNA structure are in common with those involved in DNA and chromatin stru…	[Mongelli, Alessia; Atlante, Sandra; Gaetano, Carlo] Istituti Clin Sci Maugeri IRCCS, Lab Epigenet, Via Maugeri 4, I-27100 Pavia, Italy; [Bachetti, Tiziana] Istituti Clin Sci Maugeri IRCCS, Direz Sci, Via Maugeri 4, I-27100 Pavia, Italy; [Martelli, Fabio] Policlin San Donato IRCCS, Mol Cardiol Lab, I-20097 Milan, Italy; [Farsetti, Antonella] CNR, Natl Res Council, IASI, Inst Syst Anal & Comp Sci …	IRCCS Policlinico San Donato; Consiglio Nazionale delle Ricerche (CNR); Istituto di Analisi dei Sistemi ed Informatica Antonio Ruberti (IASI-CNR)	Gaetano, C (corresponding author), Istituti Clin Sci Maugeri IRCCS, Lab Epigenet, Via Maugeri 4, I-27100 Pavia, Italy.;Farsetti, A (corresponding author), CNR, Natl Res Council, IASI, Inst Syst Anal & Comp Sci A Ruberti, I-00185 Rome, Italy.	alessia.mongelli@icsmaugeri.it; sandra.atlante@icsmaugeri.it; tiziana.bachetti@icsmaugeri.it; fabio.martelli@grupposandonato.it; afarsetti@gmail.com; carlo.gaetano@icsmaugeri.it	86	19	19	MDPI	BASEL	INT J MOL SCI	JAN 2	2020	21	10.3390/ijms21020509	http://dx.doi.org/10.3390/ijms21020509	Biochemistry & Molecular Biology; Chemistry, Multidisciplinary	Science Citation Index Expanded (SCI-EXPANDED)	31941147	View Full Record in Web of Science
J	Phillips, Stacia; Mishra, Tarun; Khadka, Shaubhagya; Bohan, Dana; Espada, Constanza E.; Maury, Wendy; Wu, Li	Epitranscriptomic N6-Methyladenosine Profile of SARS-CoV-2-Infected Human Lung Epithelial Cells	MICROBIOLOGY SPECTRUM	English	Article	N-6-methyladenosine; SARS-CoV-2; epitranscriptomics; infection; lung epithelial cells; microarray	NUCLEAR-RNA; M(6)A; TRANSCRIPTS	Posttranscriptional modification of viral and cellular RNA by N-6-methyladenosine (m(6)A) plays an important role in regulating the replication of many viruses and the cellular immune response to infection. We therefore sought to define the epitranscriptomic m(6)A profile of human lung epithelial cells infected with SARS-CoV-2. N-6-methyladenosine (m(6)A) is a dynamic posttranscriptional RNA modi…	[Phillips, Stacia; Mishra, Tarun; Khadka, Shaubhagya; Bohan, Dana; Espada, Constanza E.; Maury, Wendy; Wu, Li] Univ Iowa, Dept Microbiol & Immunol, Carver Coll Med, Iowa City, IA 52242 USA; [Bohan, Dana] Vir Biotechnol Inc, San Francisco, CA USA	University of Iowa	Wu, L (corresponding author), Univ Iowa, Dept Microbiol & Immunol, Carver Coll Med, Iowa City, IA 52242 USA.	li-wu@uiowa.edu	52	5	5	AMER SOC MICROBIOLOGY	WASHINGTON	MICROBIOL SPECTR	FEB 14	2023	11	10.1128/spectrum.03943-22	http://dx.doi.org/10.1128/spectrum.03943-22	Microbiology	Science Citation Index Expanded (SCI-EXPANDED)	36625663	View Full Record in Web of Science
J	Yang, Bo-Yu; Zhao, Fang-Zhou; Li, Jun; Wang, Xiao-Chuan; Zhao, Hui-Min; Tian, Ye	Epitranscriptomic profiling of m6A RNA methylation in renal epithelial tubular cells stimulated with calcium oxalate crystals through microarray analysis	UROLITHIASIS	English	Article	Nephrolithiasis; Calcium oxalate; m6A modification; N6-Methyladenosine		The aim of this study was to investigate the relationship of m6A RNA methylation to CaOX-induced renal tubular injury. Microarray analysis was performed to detect the difference in mRNA expression and m6A methylation between the injurious groups and controls. We established injurious renal tubular epithelial cell model induced by calcium oxalate crystals (CaOX), and we validated that CaOX could i…	[Yang, Bo-Yu; Zhao, Fang-Zhou; Li, Jun; Wang, Xiao-Chuan; Zhao, Hui-Min; Tian, Ye] Capital Med Univ, Affiliated Beijing Friendship Hosp, Dept Urol, Beijing 100050, Peoples R China	Capital Medical University	Li, J (corresponding author), Capital Med Univ, Affiliated Beijing Friendship Hosp, Dept Urol, Beijing 100050, Peoples R China.	ybyurology@163.com; zfz1501112@163.com; zfzlijun@126.com; 776308874@qq.com; 1459913619@qq.com; tianyouyiyiyuan@163.com	20	2	2	SPRINGER	NEW YORK	UROLITHIASIS	MAR 22	2023	51	10.1007/s00240-023-01425-7	http://dx.doi.org/10.1007/s00240-023-01425-7	Urology & Nephrology	Science Citation Index Expanded (SCI-EXPANDED)	36947229	View Full Record in Web of Science
J	Fu, Yu; Zorman, Barry; Sumazin, Pavel; Sanna, Pietro Paolo; Repunte-Canonigo, Vez	Epitranscriptomics: Correlation of N6-methyladenosine RNA methylation and pathway dysregulation in the hippocampus of HIV transgenic rats	PLOS ONE	English	Article		MESSENGER-RNA; M(6)A RNA; GENE FTO; EXPRESSION; N6-METHYLADENOSINE; INJURY; CELL; ASSOCIATION; ENRICHMENT; METHYLOMES	Internal RNA modifications have been known for decades, however their roles in mRNA regulation have only recently started to be elucidated. Here we investigated the most abundant mRNA modification, N-6-methyladenosine (m(6)A) in transcripts from the hippocampus of HIV transgenic (Tg) rats. The distribution of m(6)A peaks within HIV transcripts in HIV Tg rats largely corresponded to the ones obser…	[Fu, Yu; Sanna, Pietro Paolo; Repunte-Canonigo, Vez] Scripps Res Inst, Dept Immunol & Microbiol, La Jolla, CA 92037 USA; [Fu, Yu; Sanna, Pietro Paolo; Repunte-Canonigo, Vez] Scripps Res Inst, Dept Neurosci, La Jolla, CA 92037 USA; [Zorman, Barry; Sumazin, Pavel] Baylor Coll Med, Dept Pediat, Dan L Duncan Canc Ctr, Houston, TX 77030 USA; [Fu, Yu] European Bioinformat Inst EMBL EBI, Hinxton, England	Scripps Research Institute; Scripps Research Institute; Baylor College of Medicine; European Molecular Biology Laboratory (EMBL)	Sanna, PP; Repunte-Canonigo, V (corresponding author), Scripps Res Inst, Dept Immunol & Microbiol, La Jolla, CA 92037 USA.;Sanna, PP; Repunte-Canonigo, V (corresponding author), Scripps Res Inst, Dept Neurosci, La Jolla, CA 92037 USA.	psanna@scripps.edu; canonigo@scripps.edu	62	9	10	PUBLIC LIBRARY SCIENCE	SAN FRANCISCO	PLOS ONE	JAN 17	2019	14	10.1371/journal.pone.0203566	http://dx.doi.org/10.1371/journal.pone.0203566	Multidisciplinary Sciences	Science Citation Index Expanded (SCI-EXPANDED)	30653517	View Full Record in Web of Science
J	Jiang, Li; Zhang, Mengmeng; Wu, Jingni; Wang, Sixue; Yang, Xiang; Yi, Mingyu; Zhang, Xinyue; Fang, Xiaoling	Exploring diagnostic m6A regulators in endometriosis	AGING-US	English	Article	endometriosis; N6-Methyladenosine; HNRNPA2B1; HNRNPC; immune system	NUCLEAR-RNA; PERITONEAL ENDOMETRIOSIS; MESENCHYMAL TRANSITION; METHYLATION; GENE; N6-METHYLADENOSINE; RECOGNITION; PROTEINS; TISSUE	Endometriosis is an estrogen-dependent inflammatory disorder, usually causing infertility, pelvic pain, and ovarian masses. This study intended to investigate the implication of N6-methyladenosine (m6A) regulators in endometriosis. We acquired 34 normal, 127 eutopic, and 46 ectopic, samples of endometrium from the Gene Expression Omnibus (GSE7305, GSE7307, GSE51981) database and the Array-express…	[Jiang, Li; Zhang, Mengmeng; Wu, Jingni; Wang, Sixue; Yang, Xiang; Yi, Mingyu; Zhang, Xinyue; Fang, Xiaoling] Cent South Univ, Xiangya Hosp 2, Dept Obstet & Gynecol, Changsha, Hunan, Peoples R China	Central South University	Fang, XL (corresponding author), Cent South Univ, Xiangya Hosp 2, Dept Obstet & Gynecol, Changsha, Hunan, Peoples R China.	fxlfxl0510@csu.edu.cn	59	47	49	IMPACT JOURNALS LLC	ORCHARD PARK	AGING-US	DEC 31	2020	12			Cell Biology; Geriatrics & Gerontology	Science Citation Index Expanded (SCI-EXPANDED)	33232273	View Full Record in Web of Science
J	Faraj, Reem; Liang, Ying; Feng, Anlin; Wu, Jialin; Black, Stephen M.; Wang, Ting	Exploring m6A-RNA methylation as a potential therapeutic strategy for acute lung injury and acute respiratory distress syndrome	PULMONARY CIRCULATION	English	Review	acute lung injury; Acute Respiratory Distress Syndrome; m6A-RNA methylation	RNA MODIFICATION; DISEASE; EPIDEMIOLOGY; METTL14; MECHANISMS; PREVENTION; MORTALITY; CELLS; MODEL; ARDS	N-6-methyladenosine (m6A) is the most common methylation modification in mammalian messenger RNA (mRNA) and noncoding RNAs. m6A modification plays a role in the regulation of gene expression and deregulation of m6A methylation has been implicated in many human diseases. Recent publications suggest that exploitation of this methylation process may possess utility against acute lung injury (ALI). A…	[Faraj, Reem; Wang, Ting] Univ Arizona, Dept Internal Med, Coll Med Phoenix, Phoenix, AZ USA; [Liang, Ying; Feng, Anlin; Wu, Jialin; Black, Stephen M.; Wang, Ting] Florida Int Univ, Ctr Translat Sci, Port St Lucie, FL USA; [Liang, Ying; Feng, Anlin; Wu, Jialin; Black, Stephen M.; Wang, Ting] Florida Int Univ, Dept Environm Hlth Sci, Port St Lucie, FL USA; [Wang, Ting] Florida Int Univ, Ctr Transl…	University of Arizona; State University System of Florida; Florida International University; State University System of Florida; Florida International University; State University System of Florida; Florida International University; State University System of Florida; Florida International University	Wang, T (corresponding author), Florida Int Univ, Ctr Translat Sci, 11350 SW Village Pkwy, Port St Lucie, FL 34987 USA.;Wang, T (corresponding author), Florida Int Univ, Dept Environm Hlth Sci, 11350 SW Village Pkwy, Port St Lucie, FL 34987 USA.	tinwang@fiu.edu	100	4	4	WILEY	HOBOKEN	PULM CIRC	APR	2023	13	10.1002/pul2.12230	http://dx.doi.org/10.1002/pul2.12230	Cardiac & Cardiovascular Systems; Respiratory System	Science Citation Index Expanded (SCI-EXPANDED)	37091123	View Full Record in Web of Science
J	Ning, Jie; Yan, Jie; Yang, Huixia	Exploring the role of m6A modification in the great obstetrical syndromes	JOURNAL OF MATERNAL-FETAL & NEONATAL MEDICINE	English	Review	m6A; placenta; mRNA; trophoblast; N6-methyladenosine	GESTATIONAL DIABETES-MELLITUS; MESSENGER-RNA; INTERNATIONAL FEDERATION; TROPHOBLAST INVASION; GENE-EXPRESSION; PRAGMATIC GUIDE; NUCLEAR-RNA; METHYLATION; PREECLAMPSIA; DEMETHYLASE	Background N6-methyladenosine (m6A) is one of the predominant RNA epigenetic modifications that modify RNAs reversibly and dynamically by writers (methyltransferase), erasers (demethylase), and readers. Objective This review aimed to provide a comprehensive understanding of the complexity of m6A regulation in the great obstetrical syndromes to understand its pathogenesis and potential therapeutic…	[Ning, Jie; Yan, Jie; Yang, Huixia] Peking Univ First Hosp, Dept Obstet & Gynecol, Beijing, Peoples R China; [Ning, Jie; Yan, Jie; Yang, Huixia] Beijing Key Lab Maternal Fetal Med Gestat Diabet M, Beijing, Peoples R China; [Ning, Jie; Yang, Huixia] Peking Univ, Beijing, Peoples R China	Peking University; Peking University	Yang, HX (corresponding author), Peking Univ First Hosp, Dept Obstet & Gynecol, Beijing, Peoples R China.;Yang, HX (corresponding author), Beijing Key Lab Maternal Fetal Med Gestat Diabet M, Beijing, Peoples R China.;Yang, HX (corresponding author), Peking Univ, Beijing, Peoples R China.	yanghuixia@bjmu.edu.cn	50	1	1	TAYLOR & FRANCIS LTD	ABINGDON	J MATERN-FETAL NEO M	DEC 15	2023	36	10.1080/14767058.2023.2234541	http://dx.doi.org/10.1080/14767058.2023.2234541	Obstetrics & Gynecology	Science Citation Index Expanded (SCI-EXPANDED)	37474299	View Full Record in Web of Science
J	Luo, Qing; Guo, Yongqin; Xiao, Qiuyun; Fu, Biqi; Zhang, Lu; Guo, Yang; Huang, Zikun; Li, Junming	Expression and Clinical Significance of the m6A RNA-Binding Proteins YTHDF2 in Peripheral Blood Mononuclear Cells From New-Onset Ankylosing Spondylitis	FRONTIERS IN MEDICINE	English	Article	N6-methyladenosine; YTHDF2; ankylosing spondylitis; diagnosis; predictive model	GENE-EXPRESSION; NUCLEAR-RNA; N6-METHYLADENOSINE; METABOLISM; ALKBH5	This study has focused on determining the association of m6A methyltransferase [methyltransferase-like 3 (METTL3), methyltransferase-like 14 (METTL14), and Wilms tumor 1-associating protein (WTAP)], demethylase [fat mass and obesity-associated protein (FTO) and alkylation repair homolog protein 5 (ALKBH5)], RNA-binding proteins [YT521-B homology domains 2 (YTHDF2)], and ankylosing spondylitis (AS…	[Luo, Qing; Zhang, Lu; Guo, Yang; Huang, Zikun; Li, Junming] Nanchang Univ, Dept Clin Lab, Affiliated Hosp 1, Nanchang, Peoples R China; [Guo, Yongqin; Xiao, Qiuyun] Nanchang Univ, Med Coll, Nanchang, Peoples R China; [Fu, Biqi] Nanchang Univ, Dept Rheumatol, Affiliated Hosp 1, Nanchang, Peoples R China	Nanchang University; Nanchang University; Nanchang University	Huang, ZK; Li, JM (corresponding author), Nanchang Univ, Dept Clin Lab, Affiliated Hosp 1, Nanchang, Peoples R China.	491353062@qq.com; lisir361@163.com	37	8	9	FRONTIERS MEDIA SA	LAUSANNE	FRONT MED-LAUSANNE	JUN 9	2022	9	10.3389/fmed.2022.922219	http://dx.doi.org/10.3389/fmed.2022.922219	Medicine, General & Internal	Science Citation Index Expanded (SCI-EXPANDED)	35755020	View Full Record in Web of Science
J	Zhou, Hao; Shen, Xun; Yan, Chen; Xiong, Wu; Ma, Zemeng; Tan, Zhenggang; Wang, Jinwen; Li, Yao; Liu, Jiuxiang; Duan, Ao; Liu, Feng	Extracellular vesicles derived from human umbilical cord mesenchymal stem cells alleviate osteoarthritis of the knee in mice model by interacting with METTL3 to reduce m6A of NLRP3 in macrophage	STEM CELL RESEARCH & THERAPY	English	Article	Osteoarthritis; Human umbilical cord mesenchymal stem cells; Extracellular vesicles (EVs); miR-1208; METTL3; m6A; NLRP3	MESSENGER-RNA; INFLAMMATION; PROGRESSION; INJECTION; MECHANISM; INJURY; CHINA; M(6)A; AGE	Background Osteoarthritis (OA) is a prevalent degenerative joint disease that not only significantly impairs the quality of life of middle-aged and elderly individuals but also imposes a significant financial burden on patients and society. Due to their significant biological properties, extracellular vesicles (EVs) have steadily received great attention in OA treatment. This study aimed to inves…	[Zhou, Hao; Xiong, Wu; Tan, Zhenggang; Wang, Jinwen; Li, Yao; Liu, Jiuxiang; Duan, Ao; Liu, Feng] Nanjing Med Univ, Dept Orthoped, Affiliated Hosp 1, Nanjing 210029, Jiangsu, Peoples R China; [Shen, Xun] Nanjing Med Univ, Sir Run Run Hosp, Dept Orthoped, Nanjing 211100, Jiangsu, Peoples R China; [Yan, Chen] Nanjing Med Univ, Peoples Hosp Lianyungang 1, Dept Orthoped, Lianyungang 222002, Jiangsu, …	Nanjing Medical University; Nanjing Medical University; Nanjing Medical University; Nanjing Medical University	Liu, JX; Duan, A; Liu, F (corresponding author), Nanjing Med Univ, Dept Orthoped, Affiliated Hosp 1, Nanjing 210029, Jiangsu, Peoples R China.	liujxnjmufah@163.com; osteoduanao507@163.com; njliuf@163.com	65	46	49	BMC	LONDON	STEM CELL RES THER	JUL 16	2022	13	10.1186/s13287-022-03005-9	http://dx.doi.org/10.1186/s13287-022-03005-9	Cell & Tissue Engineering; Cell Biology; Medicine, Research & Experimental	Science Citation Index Expanded (SCI-EXPANDED)	35842714	View Full Record in Web of Science
J	Hu, Yifan; Chen, Jieqiong; Wang, Yuwei; Sun, Junran; Huang, Peirong; Feng, Jingyang; Liu, Te; Sun, Xiaodong	Fat mass and obesity-associated protein alleviates Aβ1-40 induced retinal pigment epithelial cells degeneration via PKA/CREB signaling pathway	CELL BIOLOGY INTERNATIONAL	English	Article	age-related macular degeneration; amyloid-beta; fat mass and obesity-associated protein; m6A-mRNA epi-transcriptomic microarray; N6-methyladenosine; retinal pigment epithelium	AMYLOID-BETA; MESSENGER-RNA; ALZHEIMERS-DISEASE; MACULAR DEGENERATION; NEUROTROPHIC FACTOR; M(6)A; METHYLATION; PROBDNF; BRAIN; ACTIVATION	Amyloid-beta (A beta) is thought to be a critical pathologic factor of retinal pigment epithelium (RPE) degeneration in age-related macular degeneration (AMD). A beta induces inflammatory responses in RPE cells and recent studies demonstrate the N6-methyladenosine (m6A) regulatory role in RPE cell inflammation. m6A is a reversible epigenetic posttranslational modification, but its relationship wi…	[Hu, Yifan; Chen, Jieqiong; Wang, Yuwei; Sun, Junran; Huang, Peirong; Feng, Jingyang; Sun, Xiaodong] Shanghai First Peoples Hosp, Natl Clin Res Ctr Ophthalm Dis, Shanghai Engn Ctr Visual Sci & Photomed, Dept Ophthalmol,Shanghai Gen Hosp,Shanghai Key La, Shanghai, Peoples R China; [Hu, Yifan; Wang, Yuwei; Sun, Xiaodong] Shanghai Jiao Tong Univ, Dept Ophthalmol, Sch Med, Shanghai, Peoples R China; …	Shanghai Jiao Tong University; Capital Medical University; Shanghai University of Traditional Chinese Medicine	Liu, T (corresponding author), Shanghai Univ Tradit Chinese Med, Shanghai Geriatr Inst Chinese Med, Cent Lab, 365 South Xiangyang Rd, Shanghai 200031, Peoples R China.;Sun, XD (corresponding author), Shanghai Gen Hosp, Natl Clin Res Ctr Ophthalm Dis, Shanghai Key Lab Ocular Fundus Dis, Shanghai Engn Ctr Visual Sci & Photomed, 100 Haining Rd, Shanghai 200080, Peoples R China.	0721160004@mail.tongji.edu.cn; xdsun@sjtu.edu.cn	51	7	7	WILEY	HOBOKEN	CELL BIOL INT	MAR	2023	47	10.1002/cbin.11959	http://dx.doi.org/10.1002/cbin.11959	Cell Biology	Science Citation Index Expanded (SCI-EXPANDED)	36378581	View Full Record in Web of Science
J	Xu, Fei; Li, Jiajia; Ni, Mengdong; Cheng, Jingyi; Zhao, Haiyun; Wang, Shanshan; Zhou, Xiang; Wu, Xiaohua	FBW7 suppresses ovarian cancer development by targeting the N6-methyladenosine binding protein YTHDF2	MOLECULAR CANCER	English	Article	FBW7; YTHDF2; BMF; N6-methyladenosine; Ubiquitination	TUMOR-SUPPRESSOR; UBIQUITIN LIGASE; CYCLIN-E; F-BOX; FBXW7; EXPRESSION; INFLAMMATION; COMPLEX; BMF	BackgroundThe tumor suppressor FBW7 is the substrate recognition component of the SCF E3-ubiquitin ligase complex that mediates proteolytic degradation of various oncogenic proteins. However, the role of FBW7 in ovarian cancer progression remains inadequately understood.MethodsIP-MASS, co-IP, immunohistochemistry, and western blotting were used to identify the potential substrate of FBW7 in ovari…	[Xu, Fei; Li, Jiajia; Ni, Mengdong; Cheng, Jingyi; Zhao, Haiyun; Wu, Xiaohua] Fudan Univ, Shanghai Canc Ctr, Dept Gynecol Oncol, Shanghai 200032, Peoples R China; [Xu, Fei; Li, Jiajia; Ni, Mengdong; Cheng, Jingyi; Zhao, Haiyun; Wang, Shanshan; Zhou, Xiang; Wu, Xiaohua] Fudan Univ, Shanghai Med Coll, Dept Oncol, Shanghai 200032, Peoples R China; [Wang, Shanshan; Zhou, Xiang] Fudan Univ, Shanghai C…	Fudan University; Fudan University; Fudan University; Fudan University	Wu, XH (corresponding author), Fudan Univ, Shanghai Canc Ctr, Dept Gynecol Oncol, Shanghai 200032, Peoples R China.;Zhou, X; Wu, XH (corresponding author), Fudan Univ, Shanghai Med Coll, Dept Oncol, Shanghai 200032, Peoples R China.	xiangzhou@fudan.edu.cn; wu.xh@fudan.edu.cn	49	74	78	BMC	LONDON	MOL CANCER	MAR 3	2021	20	10.1186/s12943-021-01340-8	http://dx.doi.org/10.1186/s12943-021-01340-8	Biochemistry & Molecular Biology; Oncology	Science Citation Index Expanded (SCI-EXPANDED)	33658012	View Full Record in Web of Science
J	Yu, Zhiyong; Zheng, Linbo; Geng, Yan; Zhang, Yuting; Wang, Yupeng; You, Guoxing; Cai, Mingsheng; Li, Meili; Cheng, Xiao; Zan, Jie	FTO alleviates cerebral ischemia/reperfusion-induced neuroinflammation by decreasing cGAS mRNA stability in an m6A-dependent manner	CELLULAR SIGNALLING	English	Article	Cerebral ischemia and reperfusion injury; N6-Methyladenosine; Fat mass and obesity -associated protein; Cyclic GMP-AMP synthase; Inflammation	METTL3-METTL14 COMPLEX; NUCLEAR-RNA; N6-METHYLADENOSINE; INHIBITION; MICROGLIA	Microglia-mediated inflammation is a major contributor to the brain damage in cerebral ischemia and reperfusion (I/R) injury, and N6-Methyladenosine (m6A) has been implicated in cerebral I/R injury. Here, we explored whether m6A modification is associated with microglia-mediated inflammation in cerebral I/R injury and its underlying regulatory mechanism using an in vivo mice model of intraluminal…	[Yu, Zhiyong; Zheng, Linbo; Geng, Yan; Zhang, Yuting; Wang, Yupeng; You, Guoxing; Li, Meili; Cheng, Xiao; Zan, Jie] Guangdong Univ Technol, Sch Biomed & Pharmaceut Sci, Guangzhou 510006, Peoples R China; [Zheng, Linbo] Guangdong Second Prov Gen Hosp, Dept Tradit Chinese Med, Guangzhou 510310, Peoples R China; [Cai, Mingsheng; Li, Meili] Guangzhou Med Univ, Affiliated Hosp 6, Qingyuan Peoples Hosp…	Guangdong University of Technology; Guangzhou Medical University; Guangzhou Medical University; Guangzhou University of Chinese Medicine; Guangzhou Medical University; Guangzhou Medical University; Guangzhou University of Chinese Medicine	Li, ML; Cheng, X; Zan, J (corresponding author), Guangdong Univ Technol, Sch Biomed & Pharmaceut Sci, Guangzhou 510006, Peoples R China.	limeili@gzhmu.edu.cn; chengxiaolucky@126.com; zanj@gdut.edu.cn	44	12	13	ELSEVIER SCIENCE INC	NEW YORK	CELL SIGNAL	SEP	2023	109	10.1016/j.cellsig.2023.110751	http://dx.doi.org/10.1016/j.cellsig.2023.110751	Cell Biology	Science Citation Index Expanded (SCI-EXPANDED)	37321527	View Full Record in Web of Science
J	Zhou, Chuandi; She, Xinping; Gu, Chufeng; Hu, Yanan; Ma, Mingming; Qiu, Qinghua; Sun, Tao; Xu, Xun; Chen, Haibing; Zheng, Zhi	FTO fuels diabetes-induced vascular endothelial dysfunction associated with inflammation by erasing m6A methylation of TNIP1	JOURNAL OF CLINICAL INVESTIGATION	English	Article		CELLULAR METABOLIC MEMORY; INSULIN-RESISTANCE; FIBROVASCULAR MEMBRANES; CLINICAL CONSEQUENCES; GENE-EXPRESSION; MEDICAL THERAPY; HIGH GLUCOSE; RNA; OBESITY; PART	Endothelial dysfunction is a critical and initiating factor of the vascular complications of diabetes. Inflammation plays an important role in endothelial dysfunction regulated by epigenetic modifications. N6-methyladenosine (m6A) is one of the most prevalent epigenetic modifications in eukaryotic cells. In this research, we identified an m6A demethylase, fat mass and obesity-associated protein (…	[Zhou, Chuandi; She, Xinping; Gu, Chufeng; Hu, Yanan; Ma, Mingming; Qiu, Qinghua; Xu, Xun; Chen, Haibing; Zheng, Zhi] Shanghai Jiao Tong Univ, Shanghai Gen Hosp, Natl Clin Res Ctr Eye Dis, Sch Med,Shanghai Engn Ctr Visual Sci & Photomed,Sh, Shanghai, Peoples R China; [Sun, Tao] Shanghai Eye Hosp, Shanghai Gen Hosp, Shanghai Eye Dis Prevent & Treatment Ctr, Natl Clin Res Ctr Eye Dis,Shanghai Key L…	Shanghai Jiao Tong University; Tongji University; Shanghai Jiao Tong University	Xu, X; Zheng, Z (corresponding author), 100 Haining Rd, Shanghai, Peoples R China.;Chen, HB (corresponding author), 301 Middle Yanchang Rd, Shanghai, Peoples R China.	drxuxun@sjtu.edu.cn; hbchen@tongji.edu.cn; zzheng88@sjtu.edu.cn	52	12	12	AMER SOC CLINICAL INVESTIGATION INC	ANN ARBOR	J CLIN INVEST	OCT 2	2023	133	10.1172/JCI160517	http://dx.doi.org/10.1172/JCI160517	Medicine, Research & Experimental	Science Citation Index Expanded (SCI-EXPANDED)	37781923	View Full Record in Web of Science
J	Gan, Xiaojie; Dai, Zhihui; Ge, Chunmei; Yin, Haozan; Wang, Yuefan; Tan, Jian; Sun, Shuhan; Zhou, Weiping; Yuan, Shengxian; Yang, Fu	FTO promotes liver inflammation by suppressing m6A mRNA methylation of IL-17RA	FRONTIERS IN ONCOLOGY	English	Article	fto; IL-17RA; RNA methylation; m6A; liver inflammation; HCC	CELLS; TRANSLATION; MECHANISMS; EXPRESSION; RECEPTOR	BackgroundPrevious studies have demonstrated that inflammation-related interleukin-17 (IL-17) signaling plays a pivotal role in the pathogenesis of non-alcoholic steatohepatitis (NASH)- and alcoholic liver disease (ALD)-induced hepatocellular carcinoma (HCC). However, rare efforts have been intended at implementing the analysis of N6-methyladenosine (m6A) mRNA methylation to elucidate the underpi…	[Gan, Xiaojie; Dai, Zhihui; Ge, Chunmei; Yin, Haozan; Wang, Yuefan; Tan, Jian; Sun, Shuhan; Yang, Fu] Naval Med Univ, Dept Med Genet, Shanghai, Peoples R China; [Gan, Xiaojie; Zhou, Weiping; Yuan, Shengxian] Naval Med Univ, Eastern Hepatobiliary Surg Hosp, Dept Hepat Surg 3, Shanghai, Peoples R China	Naval Medical University; Naval Medical University	Yang, F (corresponding author), Naval Med Univ, Dept Med Genet, Shanghai, Peoples R China.;Zhou, WP; Yuan, SX (corresponding author), Naval Med Univ, Eastern Hepatobiliary Surg Hosp, Dept Hepat Surg 3, Shanghai, Peoples R China.	ehphwp@126.com; yuanshengx@126.com; yangfusq1997@smmu.edu.cn	46	17	19	FRONTIERS MEDIA SA	LAUSANNE	FRONT ONCOL	SEP 12	2022	12	10.3389/fonc.2022.989353	http://dx.doi.org/10.3389/fonc.2022.989353	Oncology	Science Citation Index Expanded (SCI-EXPANDED)	36172147	View Full Record in Web of Science
J	Yang, Jiaojiao; Zhang, Juanli; Gao, Xiaoli; Luo, Ruirui; Xie, Kaihui; Wang, Wei; Li, Jie; Yang, Qiaoli; Huang, Xiaoyu; Yan, Zunqiang; Wang, Pengfei; Gun, Shuangbao	FTO Regulates Apoptosis in CPB2-Treated IPEC-J2 Cells by Targeting Caspase 3 Apoptotic Protein	ANIMALS	English	Article	m6A; piglet diarrhea; IPEC-J2; CPB2 toxin; FTO	MESSENGER-RNA METHYLATION; CLOSTRIDIUM-PERFRINGENS; BCL-2 FAMILY; IMMUNOHISTOCHEMICAL LOCALIZATION; COMPREHENSIVE ANALYSIS; EPITHELIAL-CELLS; GENE-EXPRESSION; BETA2 TOXIN; M(6)A; CANCER	Simple Summary Fat mass and obesity associated protein (FTO) is a key demethylase in the process of bacterial diarrhea in piglets. However, the involvement of FTO in infectious diarrhea caused by Clostridium perfringens type C is not known. This study demonstrated that FTO plays an indispensable role in this type of diarrhea; and that the absence of FTO promotes apoptosis and inflammation in the …	[Yang, Jiaojiao; Zhang, Juanli; Gao, Xiaoli; Luo, Ruirui; Xie, Kaihui; Li, Jie; Yang, Qiaoli; Huang, Xiaoyu; Yan, Zunqiang; Wang, Pengfei; Gun, Shuangbao] Gansu Agr Univ, Coll Anim Sci & Technol, Lanzhou 730070, Peoples R China; [Wang, Wei] Northwest A&F Univ, Coll Anim Sci & Technol, Xian 712100, Peoples R China; [Gun, Shuangbao] Gansu Res Ctr Swine Prod Engn & Technol, Lanzhou 730070, Peoples R…	Gansu Agricultural University; Northwest A&F University - China	Gun, SB (corresponding author), Gansu Agr Univ, Coll Anim Sci & Technol, Lanzhou 730070, Peoples R China.;Gun, SB (corresponding author), Gansu Res Ctr Swine Prod Engn & Technol, Lanzhou 730070, Peoples R China.	yangjj@st.gsau.edu.cn; zhangjuanli456888@163.com; gx118892@163.com; luoruirui628@163.com; xkh34567@163.com; wangw@st.gsau.edu.cn; lijie5272@126.com; yangq10112@163.com; huanghxy100@163.com; yanzunqiang@163.com; wangpf815@163.com; gunsbao056@126.com	60	1	2	MDPI	BASEL	ANIMALS-BASEL	JUL	2022	12	10.3390/ani12131644	http://dx.doi.org/10.3390/ani12131644	Agriculture, Dairy & Animal Science; Veterinary Sciences; Zoology	Science Citation Index Expanded (SCI-EXPANDED)	35804542	View Full Record in Web of Science
J	McFadden, Michael J. T.; Sacco, Matthew T. A.; Murphy, Kristen A.; Park, Moonhee S.; Gokhale, Nandan S. Y.; Somfleth, Kim Y. M.; Horner, Stacy M.	FTO Suppresses STAT3 Activation and Modulates Proinflammatory Interferon-Stimulated Gene Expression	JOURNAL OF MOLECULAR BIOLOGY	English	Article	fat mass and obesity-associated (FTO); N6-methyladenosine (m(6)A); interferon (IFN); interferon-stimulated gene (ISG); inflammation	NUCLEAR-RNA; FAT MASS; OBESITY; TRANSLATION; CHILDHOOD	Signaling initiated by type I interferon (IFN) results in the induction of hundreds of IFN-stimulated genes (ISGs). The type I IFN response is important for antiviral restriction, but aberrant activation of this response can lead to inflammation and autoimmunity. Regulation of this response is incompletely understood. We pre-viously reported that the mRNA modification m6A and its deposition enzym…	[McFadden, Michael J. T.; Sacco, Matthew T. A.; Murphy, Kristen A.; Park, Moonhee S.; Horner, Stacy M.] Duke Univ, Med Ctr, Dept Mol Genet & Microbiol, Durham, NC 27710 USA; [Gokhale, Nandan S. Y.; Somfleth, Kim Y. M.] Univ Washington, Dept Immunol, Seattle, WA 98109 USA; [Horner, Stacy M.] Duke Univ, Med Ctr, Dept Med, Durham, NC 27710 USA	Duke University; University of Washington; University of Washington Seattle; Duke University	Horner, SM (corresponding author), Duke Univ, Med Ctr, Dept Mol Genet & Microbiol, Durham, NC 27710 USA.	USA.mcfaddmj@umich.edu; matthew.sacco@duke.edu; kristen.a.murphy@duke.edu; moonhee.park@duke.edu; ngokhale@uw.edu; ksomf@uw.edu; stacy.horner@duke.edu	59	13	13	ACADEMIC PRESS LTD- ELSEVIER SCIENCE LTD	LONDON	J MOL BIOL	MAR 30	2022	434	10.1016/j.jmb.2021.167247	http://dx.doi.org/10.1016/j.jmb.2021.167247	Biochemistry & Molecular Biology	Science Citation Index Expanded (SCI-EXPANDED)	34537236	View Full Record in Web of Science
J	Sun, Qiao; Zhao, Tingting; Li, Biao; Li, Mengying; Luo, Ping; Zhang, Chen; Chen, Gang; Cao, Zhengguo; Li, Yicun; Du, Mingyuan; He, Hong	FTO/RUNX2 signaling axis promotes cementoblast differentiation under normal and inflammatory condition	BIOCHIMICA ET BIOPHYSICA ACTA-MOLECULAR CELL RESEARCH	English	Article	Cementoblast; Cell differentiation; N-6-methyladenosine; Fat mass and obesity-associated protein; Transcription factors; Inflammation	TNF-ALPHA; RUNX2; RNA; OSTEOBLASTS	N-6-methyladenosine (m(6)A) is the most prevalent mRNA modification which plays crucial roles in various biological processes, but its role in cementogenesis remains largely unknown. Here, using time-series transcriptomic analysis, we reveal that mRNA m(6)A demethylase Fat mass and obesity-associated protein (FTO) is involved in cementogenesis. Knocking down FTO decreases cementoblast differentia…	[Sun, Qiao; Zhao, Tingting; Li, Biao; Li, Mengying; Luo, Ping; Zhang, Chen; Chen, Gang; Cao, Zhengguo; Du, Mingyuan; He, Hong] Wuhan Univ, Sch & Hosp Stomatol, State Key Lab Breeding Base Basic Sci Stomatol Hub, Wuhan, Peoples R China; [Sun, Qiao; Zhao, Tingting; Li, Biao; Li, Mengying; Luo, Ping; Zhang, Chen; Chen, Gang; Cao, Zhengguo; Du, Mingyuan; He, Hong] Wuhan Univ, Sch & Hosp Stomatol, Key…	Wuhan University; Wuhan University; Wuhan University; Wuhan University; Wuhan University; Hong Kong University of Science & Technology; Wuhan University; Wuhan University	Du, MY; He, H (corresponding author), Wuhan Univ, Dept Orthodont, State Key Lab Breeding Base Basic Sci Stomatol Hub, Luoyu Rd 237, Wuhan 430079, Peoples R China.;Du, MY; He, H (corresponding author), Wuhan Univ, Sch & Hosp Stomatol, Key Lab Oral Biomed, Minist Educ, Luoyu Rd 237, Wuhan 430079, Peoples R China.	dumydent@whu.edu.cn; drhehong@whu.edu.cn	43	6	7	ELSEVIER	AMSTERDAM	BBA-MOL CELL RES	DEC	2022	1869	10.1016/j.bbamcr.2022.119358	http://dx.doi.org/10.1016/j.bbamcr.2022.119358	Biochemistry & Molecular Biology; Cell Biology	Science Citation Index Expanded (SCI-EXPANDED)	36084732	View Full Record in Web of Science
J	He, Siyuan; Li, Wanqian; Wang, Guoqing; Wang, Xiaotang; Fan, Wei; Zhang, Zhi; Li, Na; Hou, Shengping	FTO-mediated m6A modification alleviates autoimmune uveitis by regulating microglia phenotypes via the GPC4/TLR4/NF-KB signaling axis	GENES & DISEASES	English	Article	Fat mass and obesity-associated protein; Glypican 4; Microglia; N6-methyladenosine; Uveitis; YTH domain Family protein 3	NEW-MODEL; UVEORETINITIS; DISEASE; METHYLATION; ACTIVATION; EXPRESSION; CELLS; MICE	Uveitis, a vision-threatening inflammatory disease worldwide, is closely related to resident microglia. Retinal microglia are the main immune effector cells with strong plasticity, but their role in uveitis remains unclear. N6-methyladenosine (m6A) modification has been proven to be involved in the immune response. Therefore, we in this work aimed to identify the potentially crucial m6A regulator…	[He, Siyuan; Li, Wanqian; Wang, Guoqing; Wang, Xiaotang; Fan, Wei; Zhang, Zhi; Hou, Shengping] Chongqing Med Univ, Affiliated Hosp 1, Chongqing 400016, Peoples R China; [He, Siyuan; Li, Wanqian; Wang, Guoqing; Wang, Xiaotang; Fan, Wei; Zhang, Zhi; Hou, Shengping] Chongqing Key Lab Ophthalmol, Chongqing 400016, Peoples R China; [He, Siyuan; Li, Wanqian; Wang, Guoqing; Wang, Xiaotang; Fan, Wei; Zha…	Chongqing Medical University; Chongqing Medical University	Hou, SP (corresponding author), Chongqing Med Univ, Affiliated Hosp 1, Chongqing 400016, Peoples R China.;Li, N (corresponding author), Chongqing Med Univ, Coll Basic Med, Chongqing 400016, Peoples R China.	102600@cqmu.edu.cn; sphou828@163.com	65	11	13	KEAI PUBLISHING LTD	BEIJING	GENES DIS	SEP	2023	10	10.1016/j.gendis.2022.09.008	http://dx.doi.org/10.1016/j.gendis.2022.09.008	Biochemistry & Molecular Biology; Genetics & Heredity	Science Citation Index Expanded (SCI-EXPANDED)	37492748	View Full Record in Web of Science
J	Mi, Siyuan; Shi, Yuanjun; Dari, Gerile; Yu, Ying	Function of m6A and its regulation of domesticated animals' complex traits	JOURNAL OF ANIMAL SCIENCE	English	Review	complex traits; domesticated animals; interaction; m(6)A detection technologies; N-6-methyladenosine; small-molecule inhibitors	MESSENGER-RNA METHYLATION; NUCLEAR-RNA; M6A; DEMETHYLASE; REVEALS; FTO; N6-METHYLADENOSINE; TRANSCRIPTION; LOCALIZATION; EXPRESSION	Understanding the m(6)A process of domestic animals can potentially promote animal production performance and improve reproduction and disease resistance. N-6-methyladenosine (m(6)A) is the most functionally important epigenetic modification in RNA. The m(6)A modification widely exists in mRNA and noncoding RNA, influences the mRNA processing, and regulates the secondary structure and maturation …	[Yu, Ying] China Agr Univ, Coll Anim Sci & Technol, Key Lab Anim Genet Breeding & Reprod, Minist Agr & Rural Affairs, Beijing 100193, Peoples R China; China Agr Univ, Coll Anim Sci & Technol, Natl Engn Lab Anim Breeding, Beijing 100193, Peoples R China	Ministry of Agriculture & Rural Affairs; China Agricultural University; China Agricultural University	Yu, Y (corresponding author), China Agr Univ, Coll Anim Sci & Technol, Key Lab Anim Genet Breeding & Reprod, Minist Agr & Rural Affairs, Beijing 100193, Peoples R China.	yuying@cau.edu.cn	124	3	7	OXFORD UNIV PRESS INC	CARY	J ANIM SCI	MAR 1	2022	100	10.1093/jas/skac034	http://dx.doi.org/10.1093/jas/skac034	Agriculture, Dairy & Animal Science	Science Citation Index Expanded (SCI-EXPANDED)	35137116	View Full Record in Web of Science
J	Zhang, Shuqin; Dong, Jiali; Li, Yuan; Xiao, Huiwen; Shang, Yue; Wang, Bin; Chen, Zhiyuan; Zhang, Mengran; Fan, Saijun; Cui, Ming	Gamma-irradiation fluctuates the mRNA N6-methyladenosine (m6A) spectrum of bone marrow in hematopoietic injury*	ENVIRONMENTAL POLLUTION	English	Article	m6A; MeRIP; Epitranscriptome; Radiation; Hematopoietic injury; Mouse bone marrow	STEM-CELL INJURY; M(6)A MODIFICATION; GENE-EXPRESSION; STRESS-RESPONSE; IN-VIVO; METHYLATION; IDENTIFICATION; METTL3; TRANSLATION; MAINTENANCE	Humans benefit from nuclear technologies but consequently experience nuclear disasters or side effects of iatrogenic radiation. Hematopoietic system injury first arises upon radiation exposure. As an intricate new layer of genetic control, the posttranscriptional m6A modification of RNA has recently come under investigation and has been demonstrated to play pivotal roles in multiple physiological…	[Zhang, Shuqin; Dong, Jiali; Li, Yuan; Xiao, Huiwen; Shang, Yue; Wang, Bin; Chen, Zhiyuan; Zhang, Mengran; Fan, Saijun; Cui, Ming] Chinese Acad Med Sci & Peking Union Med Coll, Inst Radiat Med, Tianjin Key Lab Radiat Med & Mol Nucl Med, 238 Baidi Rd, Tianjin 300192, Peoples R China	Chinese Academy of Medical Sciences - Peking Union Medical College; Peking Union Medical College; Institute of Radiation Medicine - CAMS	Cui, M (corresponding author), Chinese Acad Med Sci & Peking Union Med Coll, Inst Radiat Med, Tianjin Key Lab Radiat Med & Mol Nucl Med, 238 Baidi Rd, Tianjin 300192, Peoples R China.	cuiming0403@bjmu.edu.cn	70	3	6	ELSEVIER SCI LTD	OXFORD	ENVIRON POLLUT	SEP 15	2021	285	10.1016/j.envpol.2021.117509	http://dx.doi.org/10.1016/j.envpol.2021.117509	Environmental Sciences	Science Citation Index Expanded (SCI-EXPANDED)	34380217	View Full Record in Web of Science
J	Zhu, Ruixia; Tian, Dandan; Zhao, Yating; Zhang, Chenguang; Liu, Xu	Genome-Wide Detection of m6A-Associated Genetic Polymorphisms Associated with Ischemic Stroke	JOURNAL OF MOLECULAR NEUROSCIENCE	English	Article	Ischemic stroke; m(6)A; Genetic polymorphism; Genome-wide association study		N-6-Methyladenosine (m(6)A) methylation is the most abundant post-transcription modification in eukaryotes and plays a vital role in many pathological conditions including cerebral ischemia-reperfusion injury and vascular inflammation. Moreover, recent studies have reported that single-nucleotide polymorphisms (SNPs) can affect the m(6)A modification. Therefore, we investigated the relationship b…	[Zhu, Ruixia; Tian, Dandan; Zhao, Yating; Zhang, Chenguang; Liu, Xu] China Med Univ, Dept Neurol, Affiliated Hosp 1, Shenyang, Liaoning, Peoples R China	China Medical University	Liu, X (corresponding author), China Med Univ, Dept Neurol, Affiliated Hosp 1, Shenyang, Liaoning, Peoples R China.	valentine1120@126.com	45	18	19	SPRINGERNATURE	LONDON	J MOL NEUROSCI	OCT	2021	71	10.1007/s12031-021-01805-x	http://dx.doi.org/10.1007/s12031-021-01805-x	Biochemistry & Molecular Biology; Neurosciences	Science Citation Index Expanded (SCI-EXPANDED)	33580473	View Full Record in Web of Science
J	Shen, Zhu-Jun; Han, Ye-Chen; Nie, Mu-Wen; Wang, Yi-Ning; Xiang, Ruo-Lan; Xie, Hong-Zhi	Genome-wide identification of altered RNA m6A profiles in vascular tissue of septic rats	AGING-US	English	Article	N6-methyladenosine; sepsis; aorta	CELL-ADHESION MOLECULES; MESSENGER-RNA; SMOOTH-MUSCLE; SEVERE SEPSIS; RECEPTOR; METTL3; METAANALYSIS; METHYLATION; SENSITIVITY; EXPRESSION	Sepsis is the leading cause of death in hospital intensive care units. In light of recent studies showing that variations in N-6-methyladenosine (m(6)A) levels in different RNA transcripts influence inflammatory responses, we evaluated the m(6)A profiles of rat aortic mRNAs and lncRNAs after lipopolysaccharide (LPS)-induced sepsis. LC-MS-based mRNA modification analysis showed that global m(6)A l…	[Shen, Zhu-Jun; Han, Ye-Chen; Nie, Mu-Wen; Wang, Yi-Ning; Xie, Hong-Zhi] Chinese Acad Med Sci & Peking Union Med Coll, Peking Union Med Coll Hosp, Dept Cardiol, Beijing 100730, Peoples R China; [Xiang, Ruo-Lan] Peking Univ, Dept Physiol & Pathophysiol, Sch Basic Med Sci, Beijing 100191, Peoples R China	Chinese Academy of Medical Sciences - Peking Union Medical College; Peking Union Medical College; Peking Union Medical College Hospital; Peking University	Xie, HZ (corresponding author), Chinese Acad Med Sci & Peking Union Med Coll, Peking Union Med Coll Hosp, Dept Cardiol, Beijing 100730, Peoples R China.	drxiehz@163.com	50	12	12	IMPACT JOURNALS LLC	ORCHARD PARK	AGING-US	SEP 15	2021	13			Cell Biology; Geriatrics & Gerontology	Science Citation Index Expanded (SCI-EXPANDED)	34507301	View Full Record in Web of Science
J	Wu, Jun; Yuan, Xiao-Hui; Jiang, Wen; Lu, Yi-Chen; Huang, Qi-Lin; Yang, Yi; Qie, Hua-Ji; Liu, Jiang-Tao; Sun, Hong-Yu; Tang, Li-Jun	Genome-wide map of N6-methyladenosine circular RNAs identified in mice model of severe acute pancreatitis	WORLD JOURNAL OF GASTROENTEROLOGY	English	Article	Severe acute pancreatitis; Circular RNAs; N-6-methyladenosine; MeRIP-seq; Epigenetic analysis	AUTOPHAGY	BACKGROUNDSevere acute pancreatitis (SAP) is a deadly inflammatory disease with complex pathogenesis and lack of effective therapeutic options. N-6-methyladenosine (m(6)A) modification of circRNAs plays important roles in physiological and pathological processes. However, the roles of m(6)A circRNA in the pathological process of SAP remains unknown.AIMTo identify transcriptome-wide map of m(6)A c…	[Wu, Jun; Yuan, Xiao-Hui; Jiang, Wen; Lu, Yi-Chen; Huang, Qi-Lin; Yang, Yi; Qie, Hua-Ji; Liu, Jiang-Tao; Sun, Hong-Yu; Tang, Li-Jun] Gen Hosp Western Theater Command, Dept Gen Surg, 270 Tianhuan Rd,Furong Ave, Chengdu 610036, Sichuan, Peoples R China; [Wu, Jun; Yuan, Xiao-Hui; Jiang, Wen; Lu, Yi-Chen; Huang, Qi-Lin; Yang, Yi; Qie, Hua-Ji; Liu, Jiang-Tao; Sun, Hong-Yu; Tang, Li-Jun] Gen Hosp Weste…	Southwest Jiaotong University	Tang, LJ (corresponding author), Gen Hosp Western Theater Command, Dept Gen Surg, 270 Tianhuan Rd,Furong Ave, Chengdu 610036, Sichuan, Peoples R China.;Tang, LJ (corresponding author), Gen Hosp Western Theater Command, Pancreat Injury & Repair Key Lab Sichuan Prov, 270 Tianhuan Rd,Furong Ave, Chengdu 610036, Sichuan, Peoples R China.	tanglj2016@163.com	39	9	9	BAISHIDENG PUBLISHING GROUP INC	PLEASANTON	WORLD J GASTROENTERO	NOV 21	2021	27	10.3748/wjg.v27.i43.7530	http://dx.doi.org/10.3748/wjg.v27.i43.7530	Gastroenterology & Hepatology	Science Citation Index Expanded (SCI-EXPANDED)	34887647	View Full Record in Web of Science
J	Peng, Qian; Qiao, Jialu; Li, Weiling; You, Qiang; Hu, Song; Liu, Yuchen; Liu, Wei; Hu, Kanghong; Sun, Binlian	Global m6A methylation and gene expression patterns in human microglial HMC3 cells infected with HIV-1	HELIYON	English	Article	N6-methyladenosine; HIV-1; HMC3; MeRIP-seq; RNA-Seq	MESSENGER-RNA METHYLATION; NUCLEAR-RNA; M(6)A; N6-METHYLADENOSINE; REVEALS; COMPLEX; IDENTIFICATION; DEMETHYLASE; METABOLISM; ENRICHMENT	N6-methyladenosine (m6A) methylation of human immunodeficiency virus type 1 (HIV-1) RNA regulates viral replication, and the m6A of host RNA is affected by HIV-1 infection, but its global pattern and function are still unclear. In this study, we report that the number and position of m6A peaks in huge genes of human microglial HMC3 cells were modulated by a single cycle HIV -1 pseudotyped with VS…	[Peng, Qian; Hu, Kanghong] Hubei Univ Technol, Sino German Biomed Ctr,Cooperat Innovat Ctr Ind Fe, Natl Ctr Cellular Regulat & Mol Pharmaceut 111, Minist Educ & Hubei Prov,Minist Educ, Wuhan, Peoples R China; [Peng, Qian; Qiao, Jialu; Li, Weiling; You, Qiang; Hu, Song; Liu, Yuchen; Liu, Wei; Sun, Binlian] Jianghan Univ, Wuhan Inst Biomed Sci, Sch Med, Wuhan 430056, Peoples R China; [Qiao, Jialu; …	Hubei University of Technology; Jianghan University; Jianghan University	Hu, KH (corresponding author), Hubei Univ Technol, Sino German Biomed Ctr,Cooperat Innovat Ctr Ind Fe, Natl Ctr Cellular Regulat & Mol Pharmaceut 111, Minist Educ & Hubei Prov,Minist Educ, Wuhan, Peoples R China.;Sun, BL (corresponding author), Jianghan Univ, Wuhan Inst Biomed Sci, Sch Med, Wuhan 430056, Peoples R China.	hukh@hbut.edu.cn; binlian17@jhun.edu.cn	57	3	4	CELL PRESS	CAMBRIDGE	HELIYON	NOV	2023	9	10.1016/j.heliyon.2023.e21307	http://dx.doi.org/10.1016/j.heliyon.2023.e21307	Multidisciplinary Sciences	Science Citation Index Expanded (SCI-EXPANDED)	38027859	View Full Record in Web of Science
J	Olazagoitia-Garmendia, Ane; Zhang, Linda; Mera, Paula; Godbout, Julie K.; Sebastian-DelaCruz, Maialen; Garcia-Santisteban, Iraia; Mendoza, Luis Manuel; Huerta, Alain; Irastorza, Inaki; Bhagat, Govind; Green, Peter H.; Herrero, Laura; Serra, Dolors; Rodriguez, Jose Antonio; Verdu, Elena F.; He, Chuan; Bilbao, Jose Ramon; Castellanos-Rubio, Ainara	Gluten-induced RNA methylation changes regulate intestinal inflammation via allele-specific XPO1 translation in epithelial cells	GUT	English	Article		CELIAC-DISEASE; MECHANISM; VARIANTS; METTL14; EXPORT; IL-8	Objectives Coeliac disease (CD) is a complex autoimmune disorder that develops in genetically susceptible individuals. Dietary gluten triggers an immune response for which the only available treatment so far is a strict, lifelong gluten free diet. Human leucocyte antigen (HLA) genes and several non-HLA regions have been associated with the genetic susceptibility to CD, but their role in the patho…	[Olazagoitia-Garmendia, Ane; Sebastian-DelaCruz, Maialen; Garcia-Santisteban, Iraia; Mendoza, Luis Manuel; Rodriguez, Jose Antonio; Castellanos-Rubio, Ainara] Univ Basque Country UPV EHU, Dept Genet Phys Anthropol & Anim Physiol, Leioa, Spain; [Olazagoitia-Garmendia, Ane; Sebastian-DelaCruz, Maialen; Bilbao, Jose Ramon; Castellanos-Rubio, Ainara] Biocruces Bizkaia Hlth Res Inst, Baracaldo, Spain;…	University of Basque Country; Howard Hughes Medical Institute; University of Chicago; CIBER - Centro de Investigacion Biomedica en Red; CIBEROBN; Instituto de Salud Carlos III; McMaster University; Galdakao Hospital; University of Basque Country; Columbia University; Instituto de Salud Carlos III; CIBER - Centro de Investigacion Biomedica en Red; CIBERDEM; Basque Foundation for Science	Castellanos-Rubio, A (corresponding author), Univ Basque Country, Genet Phys Anthropol & Anim Physiol, Leioa 48940, Spain.	ainara.castellanos@ehu.eus	46	29	32	BMJ PUBLISHING GROUP	LONDON	GUT	JAN	2022	71	10.1136/gutjnl-2020-322566	http://dx.doi.org/10.1136/gutjnl-2020-322566	Gastroenterology & Hepatology	Science Citation Index Expanded (SCI-EXPANDED)	33526437	View Full Record in Web of Science
J	Ding, Hongda; Zhang, Xixia; Su, Yang; Jia, Changjun; Dai, Chaoliu	GNAS promotes inflammation-related hepatocellular carcinoma progression by promoting STAT3 activation	CELLULAR & MOLECULAR BIOLOGY LETTERS	English	Article	Hepatocellular carcinoma; Lipopolysaccharides; G-protein alpha-subunit; Signal transducer and activator of transcription 3; Interleukin-6	CANCER; DIAGNOSIS; THERAPY; ALPHA	Background Hepatocellular carcinoma (HCC) is still the most common cause of cancer-related mortality worldwide and accumulating studies report that HCC is frequently linked to chronic inflammation. G-protein alpha-subunit (GNAS)-activating mutations have recently been reported to form a rare subgroup of inflammatory liver tumors. In this study, we investigated the roles of GNAS in inflammation-re…	[Ding, Hongda; Su, Yang; Jia, Changjun; Dai, Chaoliu] China Med Univ, Dept Gen Surg, Shengjing Hosp, 36 Sanhao Rd, Shenyang 110004, Peoples R China; [Zhang, Xixia] China Med Univ, Dept Otolaryngol Head & Neck Surg, Shengjing Hosp, 36 Sanhao Rd, Shenyang 110004, Peoples R China	China Medical University; China Medical University	Dai, CL (corresponding author), China Med Univ, Dept Gen Surg, Shengjing Hosp, 36 Sanhao Rd, Shenyang 110004, Peoples R China.	daiclsjh@163.com	32	53	54	BMC	LONDON	CELL MOL BIOL LETT	FEB 24	2020	25	10.1186/s11658-020-00204-1	http://dx.doi.org/10.1186/s11658-020-00204-1	Biochemistry & Molecular Biology; Cell Biology	Science Citation Index Expanded (SCI-EXPANDED)	32123532	View Full Record in Web of Science
J	Luo, Rong; Li, Lan; Han, Qingluan; Fu, Jingsong; Xiao, Fan	HAGLR, stabilized by m6A modification, triggers PTEN-Akt signaling cascade-mediated RPE cell pyroptosis via sponging miR-106b-5p	JOURNAL OF BIOCHEMICAL AND MOLECULAR TOXICOLOGY	English	Article	diabetic retinopathy; HAGLR; miR-106b-5p; PTEN; pyroptosis	PIGMENT EPITHELIUM-CELLS; APOPTOSIS; PROMOTES; INFLAMMATION; PROGRESSION; EXPRESSION; NECROSIS	Consistent hyperglycaemia on retinal microvascular tissues is recognized as a vital inducer of diabetic retinopathy (DR) pathogenesis. In view of the essential functionality of long noncoding RNAs (lncRNAs) in multiple human diseases, we aim to figure out the exact role and underlying mechanisms of lncRNA HOXD Cluster Antisense RNA 1 (HAGLR) in DR pathogenesis. Serum specimens from patients with …	[Luo, Rong; Li, Lan; Han, Qingluan; Fu, Jingsong; Xiao, Fan] Nanchang Med Coll, Affiliated Hosp 1, Jiangxi Prov Peoples Hosp, Dept ophthalmol, Nanchang, Jiangxi, Peoples R China; [Xiao, Fan] Nanchang Med Coll, Jiangxi Prov Peoples Hosp, Dept Ophthalmol, Affiliated Hosp 1, 152 Aiguo Rd, Nanchang 330000, Jiangxi, Peoples R China		Xiao, F (corresponding author), Nanchang Med Coll, Jiangxi Prov Peoples Hosp, Dept Ophthalmol, Affiliated Hosp 1, 152 Aiguo Rd, Nanchang 330000, Jiangxi, Peoples R China.	oceanbluegenie@126.com	44	2	2	WILEY	HOBOKEN	J BIOCHEM MOL TOXIC	JAN	2024	38	10.1002/jbt.23596	http://dx.doi.org/10.1002/jbt.23596	Biochemistry & Molecular Biology; Toxicology	Science Citation Index Expanded (SCI-EXPANDED)	38088496	View Full Record in Web of Science
J	Yang, Lan; Fu, Jinrong; Han, Xiao; Zhang, Caiyan; Xia, Li; Zhu, Ronghui; Huang, Saihua; Xiao, Wenfeng; Yu, Hongmiao; Gao, Yajing; Liang, Qiuyan; Li, Wei; Zhou, Yufeng	Hsa_circ_0004287 inhibits macrophagemediated inflammation in an N6-methyladenosine-dependent manner in atopic dermatitis and psoriasis	JOURNAL OF ALLERGY AND CLINICAL IMMUNOLOGY	English	Article	Circular RNA; atopic dermatitis; psoriasis; macrophage activation; N-6-methyladenosine	MESSENGER-RNA; EXPRESSION	Background: Circular RNA (circRNA) has been implicated in various diseases; however, its role in atopic dermatitis (AD) or psoriasis remains unclear. Objective: We sought to determine the differential expression profiles of circRNAs in peripheral blood mononuclear cells between healthy controls and AD patients, and explore the mechanisms underlying the effects of circRNAs on the pathogenesis of A…	[Yang, Lan; Fu, Jinrong; Han, Xiao; Zhang, Caiyan; Xia, Li; Huang, Saihua; Xiao, Wenfeng; Yu, Hongmiao; Gao, Yajing; Liang, Qiuyan; Zhou, Yufeng] Fudan Univ, Inst Pediat, Childrens Hosp, Natl Childrens Med Ctr, Shanghai, Peoples R China; [Yang, Lan; Fu, Jinrong; Han, Xiao; Zhang, Caiyan; Xia, Li; Huang, Saihua; Xiao, Wenfeng; Yu, Hongmiao; Gao, Yajing; Liang, Qiuyan; Zhou, Yufeng] Fudan Univ, Sha…	Fudan University; Fudan University; Fudan University; Fudan University; Fudan University; Fudan University	Zhou, YF (corresponding author), 399 Wanyuan Rd, Shanghai 201102, Peoples R China.;Li, W (corresponding author), 12 Middle Wulumuqi Rd, Shanghai 200040, Peoples R China.	liweiderma@fudan.edu.cn; yfzhou1@fudan.edu.cn	40	55	60	MOSBY-ELSEVIER	NEW YORK	J ALLERGY CLIN IMMUN	JUN	2022	149	10.1016/j.jaci.2021.11.024	http://dx.doi.org/10.1016/j.jaci.2021.11.024	Allergy; Immunology	Science Citation Index Expanded (SCI-EXPANDED)	34953789	View Full Record in Web of Science
J	Liu, Shujing; Song, Shiyu; Wang, Shuan; Cai, Tonghui; Qin, Lian; Wang, Xinzhuang; Zhu, Guangming; Wang, Haibo; Yang, Wenqi; Fang, Chunlu; Wei, Yuan; Zhou, Fu; Yu, Yang; Lin, Shaozhang; Peng, Shuang; Li, Liangming	Hypothalamic FTO promotes high-fat diet-induced leptin resistance in mice through increasing CX3CL1 expression	JOURNAL OF NUTRITIONAL BIOCHEMISTRY	English	Article	Hypothalamus; leptin resistance; high-fat diet; FTO; CX3CL1	FRACTALKINE CX3CL1; KAPPA-B; OBESITY; RNA; RECEPTOR; ACID; GENE; INFLAMMATION; WEIGHT; MASS	Long-term consumption of a high-fat diet (HFD) disrupts energy homeostasis and leads to weight gain. The fat mass and obesity-associated (FTO) gene has been consistently identified to be associated with HFD-induced obesity. The hypothalamus is crucial for regulating energy balance, and HFD-induced hypothalamic leptin resistance contributes to obesity. FTO, an N6-methyladenosine (m6A) RNA methylat…	[Liu, Shujing; Song, Shiyu; Wang, Shuan; Qin, Lian; Wang, Xinzhuang; Zhu, Guangming; Wang, Haibo; Yang, Wenqi; Fang, Chunlu; Wei, Yuan; Zhou, Fu; Yu, Yang; Peng, Shuang; Li, Liangming] Guangzhou Sport Univ, Sci Res Ctr, Key Lab Sports Tech Tact & Phys Funct, Gen Adm Sport China, Guangzhou 510500, Peoples R China; [Yu, Yang; Peng, Shuang; Li, Liangming] Guangzhou Sport Univ, Sch Sport & Hlth Sci, …	Guangzhou Sport University; Guangzhou Sport University; Guangzhou Medical University	Peng, S; Li, LM (corresponding author), Guangzhou Sport Univ, Sci Res Ctr, Key Lab Sports Tech Tact & Phys Funct, Gen Adm Sport China, Guangzhou 510500, Peoples R China.;Peng, S; Li, LM (corresponding author), Guangzhou Sport Univ, Sch Sport & Hlth Sci, Guangzhou 510500, Peoples R China.;Lin, SZ (corresponding author), Guangzhou Med Univ, Affiliated Hosp 3, Guangzhou 510150, Peoples R China.	13760710054@163.com; pengshuang@gzsport.edu.cn; liliangming@gzsport.edu.cn	81	2	2	ELSEVIER SCIENCE INC	NEW YORK	J NUTR BIOCHEM	JAN	2024	123	10.1016/j.jnutbio.2023.109512	http://dx.doi.org/10.1016/j.jnutbio.2023.109512	Biochemistry & Molecular Biology; Nutrition & Dietetics	Science Citation Index Expanded (SCI-EXPANDED)	37907171	View Full Record in Web of Science
J	Jin, Haifeng; Wu, Zheng; Tan, Bibo; Liu, Zhen; Zu, Zhanfei; Wu, Xiaoyun; Bi, Yuwang; Hu, Xingmao	Ibuprofen promotes p75 neurotrophin receptor expression through modifying promoter methylation and N6-methyladenosine-RNA-methylation in human gastric cancer cells	BIOENGINEERED	English	Article	Ibuprofen; promoter methylation; m6A-RNA-methylation; p75NTR; gastric cancer	MULTIDRUG-RESISTANCE; M(6)A METHYLATION; RNA; TRANSLATION; METASTASIS; APOPTOSIS; SURVIVAL	It is acknowledged that nonsteroidal anti-inflammatory drugs (NSAIDs) can participate in various signaling pathways, while information about their epigenetic effects are limited. p75NTR (p75 neurotrophin receptor) can inhibit tumor growth by inducing cell cycle arrest and regulating cell cycle arrest and apoptotic cell death. The expression of p75NTR is influenced by epigenetic roles. We explored…	[Jin, Haifeng; Liu, Zhen; Zu, Zhanfei; Wu, Xiaoyun] 980 Hosp PLA Joint Logist Support Force, Primary Bethune Int Peace Hosp PLA, Dept Gastroenterol, Shijiazhuang, Hebei, Peoples R China; [Wu, Zheng] Hebei Med Univ, Hosp 4, Dept Tumor Immunol, Shijiazhuang, Hebei, Peoples R China; [Tan, Bibo] Hebei Med Univ, Hosp 4, Dept Gen Surg, Shijiazhuang, Hebei, Peoples R China; [Bi, Yuwang] 980 Hosp PLA Joi…	Hebei Medical University; Hebei Medical University	Jin, HF (corresponding author), 980 Hosp PLA Joint Logist Support Force, Primary Bethune Int Peace Hosp PLA, Dept Gastroenterol, 3 South Ring Rd, Handan 050082, Hebei, Peoples R China.	hpyykyzy@163.com	37	6	7	TAYLOR & FRANCIS INC	PHILADELPHIA	BIOENGINEERED	JUN 1	2022	13	10.1080/21655979.2022.2092674	http://dx.doi.org/10.1080/21655979.2022.2092674	Biotechnology & Applied Microbiology	Science Citation Index Expanded (SCI-EXPANDED)	35758042	View Full Record in Web of Science
J	Song, Yang; Qu, Hui	Identification and validation of a seven m6A-related lncRNAs signature predicting prognosis of ovarian cancer	BMC CANCER	English	Article	Ovarian cancer; m6A-related lncRNAs; Prognosis; Nomogram; ceRNA network	PROGRESSION	Background Long non-coding RNAs (lncRNAs) play an important role in angiogenesis, immune response, inflammatory response and tumor development and metastasis. m6 A (N6-methyladenosine) is one of the most common RNA modifications in eukaryotes. The aim of our research was to investigate the potential prognostic value of m6A-related lncRNAs in ovarian cancer (OC). Methods The data we need for our r…	[Song, Yang; Qu, Hui] China Med Univ, Shengjing Hosp, Dept Obstet & Gynecol, 36 Sanhao St, Shenyang 110004, Liaoning, Peoples R China	China Medical University	Qu, H (corresponding author), China Med Univ, Shengjing Hosp, Dept Obstet & Gynecol, 36 Sanhao St, Shenyang 110004, Liaoning, Peoples R China.	quhui1122@163.com	27	11	11	BMC	LONDON	BMC CANCER	JUN 8	2022	22	10.1186/s12885-022-09591-4	http://dx.doi.org/10.1186/s12885-022-09591-4	Oncology	Science Citation Index Expanded (SCI-EXPANDED)	35676619	View Full Record in Web of Science
J	Sun, Jiani; Gan, Lei; Sun, Jing	Identification and Validation of Three m6A Regulators: FTO, HNRNPC, and HNRNPA2B1 as Potential Biomarkers for Endometriosis	GENES	English	Article	endometriosis; m6A RNA methylation regulators; random forest; consensus clustering; immune infiltration; pyroptosis; inflammation	PERITONEAL-FLUID; WOMEN; PATHOGENESIS; GENES; CELLS	Background: N6-methyladenosine is involved in numerous biological processes. However, the significance of m6A regulators in endometriosis is still unclear. Methods: We extracted three significant m6A regulators between non-endometriosis and endometriosis patients from GSE6364 and then we used the random forest model to obtain significant m6A regulators. In addition, we used the nomogram model to …	[Sun, Jiani; Sun, Jing] Tongji Univ, Shanghai Matern & Infant Hosp 1, Shanghai Inst Maternal Fetal Med & Gynecol Oncol, Sch Med, Shanghai 200092, Peoples R China; [Gan, Lei] Ningbo First Hosp, Dept Gynaecol & Obstet, Ningbo 315010, Peoples R China	Tongji University; Ningbo University	Sun, J (corresponding author), Tongji Univ, Shanghai Matern & Infant Hosp 1, Shanghai Inst Maternal Fetal Med & Gynecol Oncol, Sch Med, Shanghai 200092, Peoples R China.	sunjing61867@tongji.edu.cn	48	4	4	MDPI	BASEL	GENES-BASEL	JAN	2023	14	10.3390/genes14010086	http://dx.doi.org/10.3390/genes14010086	Genetics & Heredity	Science Citation Index Expanded (SCI-EXPANDED)	36672827	View Full Record in Web of Science
J	Li, Yao; Zhang, Wei; Dai, Yan; Chen, Keping	Identification and verification of IGFBP3 and YTHDC1 as biomarkers associated with immune infiltration and mitophagy in hypertrophic cardiomyopathy	FRONTIERS IN GENETICS	English	Article	hypertrophic cardiomyopathy; N6-methyladenosine methylation modification; immune infiltration; mitophagy; energy metabolism	M(6)A RNA METHYLATION; GENE-EXPRESSION	Background: Hypertrophic cardiomyopathy (HCM) is the main cause of sudden cardiac death among young adults, yet its pathogenesis remains vague. N6-methyladenosine (m6A) methylation modification was involved in various cardiovascular diseases such as coronary heart disease and heart failure, although its influence on HCM remains unclear. This study aimed to explore the potential role of m6A in the…	[Li, Yao; Dai, Yan; Chen, Keping] Chinese Acad Med Sci & Peking Union Med Coll, Fuwai Hosp, Natl Ctr Cardiovasc Dis, State Key Lab Cardiovasc Dis, Beijing, Peoples R China; [Zhang, Wei] Chinese Acad Med Sci, Beijing Hosp, Inst Geriatr Med, Natl Ctr Gerontol,Dept Urol, Beijing, Peoples R China	Chinese Academy of Medical Sciences - Peking Union Medical College; Fu Wai Hospital - CAMS; Peking Union Medical College; Beijing Hospital; Chinese Academy of Medical Sciences - Peking Union Medical College	Dai, Y; Chen, KP (corresponding author), Chinese Acad Med Sci & Peking Union Med Coll, Fuwai Hosp, Natl Ctr Cardiovasc Dis, State Key Lab Cardiovasc Dis, Beijing, Peoples R China.	daiy7516@sina.com; chenkeping@263.net	47	13	13	FRONTIERS MEDIA SA	LAUSANNE	FRONT GENET	OCT 4	2022	13	10.3389/fgene.2022.986995	http://dx.doi.org/10.3389/fgene.2022.986995	Genetics & Heredity	Science Citation Index Expanded (SCI-EXPANDED)	36267414	View Full Record in Web of Science
J	Liu, Zheng; Wang, Lei; Xing, Qichang; Liu, Xiang; Hu, Yixiang; Li, Wencan; Yan, Qingzi; Liu, Renzhu; Huang, Nan	Identification of GLS as a cuproptosis-related diagnosis gene in acute myocardial infarction	FRONTIERS IN CARDIOVASCULAR MEDICINE	English	Article	cuproptosis-related genes; acute myocardial infarction; immune landscape analysis; GLS; GSEA	PYRUVATE-DEHYDROGENASE COMPLEX; MESSENGER-RNA; CELLS; TISSUE; MITOCHONDRIA; INFLAMMATION; CONTRIBUTE; ISCHEMIA; DISEASE; FATE	Acute myocardial infarction (AMI) has the characteristics of sudden onset, rapid progression, poor prognosis, and so on. Therefore, it is urgent to identify diagnostic and prognostic biomarkers for it. Cuproptosis is a new form of mitochondrial respiratory-dependent cell death. However, studies are limited on the clinical significance of cuproptosis-related genes (CRGs) in AMI. In this study, we …	[Liu, Zheng; Xing, Qichang; Liu, Xiang; Hu, Yixiang; Li, Wencan; Yan, Qingzi; Liu, Renzhu; Huang, Nan] Xiangtan Ctr Hosp, Clin Pharm, Xiangtan, Peoples R China; [Liu, Zheng; Xing, Qichang; Liu, Xiang; Hu, Yixiang; Li, Wencan; Yan, Qingzi; Liu, Renzhu] Zhou Honghao Res Inst Xiangtan, Xiangtan, Peoples R China; [Wang, Lei] Xiangtan Ctr Hosp, Dept Cardiovasc Med, Xiangtan, Peoples R China		Huang, N (corresponding author), Xiangtan Ctr Hosp, Clin Pharm, Xiangtan, Peoples R China.	604501207@qq.com	65	16	16	FRONTIERS MEDIA SA	LAUSANNE	FRONT CARDIOVASC MED	NOV 11	2022	9	10.3389/fcvm.2022.1016081	http://dx.doi.org/10.3389/fcvm.2022.1016081	Cardiac & Cardiovascular Systems	Science Citation Index Expanded (SCI-EXPANDED)	36440046	View Full Record in Web of Science
J	Guo, Min; Yan, Rui; Ji, Qingwei; Yao, Hongmei; Sun, Meng; Duan, Liqin; Xue, Zheng; Jia, Yongping	IFN regulatory Factor-1 induced macrophage pyroptosis by modulating m6A modification of circ_0029589 in patients with acute coronary syndrome	INTERNATIONAL IMMUNOPHARMACOLOGY	English	Article	IRF-1; Circ_0029589; N6-methyladenosine; Macrophage pyroptosis; Atherosclerosis	IMMUNE-RESPONSES; MESSENGER-RNA; INFLAMMASOME; APOPTOSIS; CELLS	Background: Pyroptosis is identified as a novel form of inflammatory programmed cell death and has been recently found to be closely related to atherosclerosis (AS). We found that IFN regulatory factor-1(IRF-1) effectively promotes macrophage pyroptosis in patients with acute coronary syndrome (ACS). Subsequent studies have demonstrated that circRNAs are implicated in AS. However, the underlying …	[Guo, Min; Yao, Hongmei; Sun, Meng; Duan, Liqin; Xue, Zheng; Jia, Yongping] Shanxi Med Univ, Hosp 1, Dept Cardiol, Taiyuan 030000, Peoples R China; [Yan, Rui] Shanxi Med Univ, Taiyuan, Peoples R China; [Ji, Qingwei] Peoples Hosp Guangxi Zhuang Autonomous Reg, Dept Cardiol, Nanning, Peoples R China	Shanxi Medical University; Shanxi Medical University	Guo, M (corresponding author), Shanxi Med Univ, Hosp 1, Dept Cardiol, Taiyuan 030000, Peoples R China.	guomin162@163.com	43	74	82	ELSEVIER	AMSTERDAM	INT IMMUNOPHARMACOL	SEP	2020	86	10.1016/j.intimp.2020.106800	http://dx.doi.org/10.1016/j.intimp.2020.106800	Immunology; Pharmacology & Pharmacy	Science Citation Index Expanded (SCI-EXPANDED)	32674051	View Full Record in Web of Science
J	Ji, Runbi; Wu, Chenxi; Yao, Jun; Xu, Jiajin; Lin, Jiang; Gu, Hongbing; Fu, Min; Zhang, Xiaoxin; Li, Yongkang; Zhang, Xu	IGF2BP2-meidated m6A modification of CSF2 reprograms MSC to promote gastric cancer progression	CELL DEATH & DISEASE	English	Article		CELLS; MIGRATION	The interaction between tumor cells and stromal cells within the tumor microenvironment plays a critical role in cancer progression. Mesenchymal stem cells (MSCs) are important tumor stromal cells that exhibit pro-oncogenic activities when reprogrammed by the tumor. However, the precise mechanisms underlying MSC reprogramming in gastric cancer remain not well understood. QRT-PCR, western blot, an…	[Ji, Runbi; Wu, Chenxi; Yao, Jun; Xu, Jiajin] Jiangsu Univ, Affiliated Peoples Hosp, Inst Digest Dis, Dept Gastroenterol, Zhenjiang 212002, Jiangsu, Peoples R China; [Ji, Runbi; Wu, Chenxi; Xu, Jiajin; Zhang, Xiaoxin; Zhang, Xu] Jiangsu Univ, Sch Med, Jiangsu Key Lab Med Sci & Lab Med, Zhenjiang 212013, Jiangsu, Peoples R China; [Ji, Runbi; Wu, Chenxi; Xu, Jiajin; Gu, Hongbing; Li, Yongkang] Jian…	Jiangsu University; Jiangsu University; Jiangsu University; Jiangsu University	Zhang, X (corresponding author), Jiangsu Univ, Sch Med, Jiangsu Key Lab Med Sci & Lab Med, Zhenjiang 212013, Jiangsu, Peoples R China.	xuzhang@ujs.edu.cn	54	1	1	SPRINGERNATURE	LONDON	CELL DEATH DIS	OCT 21	2023	14	10.1038/s41419-023-06163-7	http://dx.doi.org/10.1038/s41419-023-06163-7	Cell Biology	Science Citation Index Expanded (SCI-EXPANDED)	37865637	View Full Record in Web of Science
J	Chen, Hongyan; Zhang, Xiaoting; Su, Hao; Zeng, Judeng; Chan, Hung; Li, Qing; Liu, Xiaodong; Zhang, Lin; Wu, William Ka Kei; Chan, Matthew Tak Vai; Chen, Huarong	Immune dysregulation and RNA N6-methyladenosine modification in sepsis	WILEY INTERDISCIPLINARY REVIEWS-RNA	English	Review	hyperinflammation; immunosuppression; N6-methyladenosine; reprogramming; sepsis	NEUTROPHIL EXTRACELLULAR TRAPS; INNATE LYMPHOID-CELLS; SEPTIC SHOCK; MESSENGER-RNA; CRITICALLY-ILL; INDUCED IMMUNOSUPPRESSION; PERSISTENT INFLAMMATION; CRITICAL ILLNESS; GLOBAL BURDEN; METHYLATION	Sepsis is defined as life-threatening organ dysfunction caused by the host immune dysregulation to infection. It is a highly heterogeneous syndrome with complex pathophysiological mechanisms. The host immune response to sepsis can be divided into hyper-inflammatory and immune-suppressive phases which could exist simultaneously. In the initial stage, systemic immune response is activated after exp…	[Chen, Hongyan; Zhang, Xiaoting; Su, Hao; Zeng, Judeng; Chan, Hung; Li, Qing; Liu, Xiaodong; Zhang, Lin; Wu, William Ka Kei; Chan, Matthew Tak Vai; Chen, Huarong] Chinese Univ Hong Kong, Dept Anaesthesia & Intens Care, Hong Kong, Peoples R China; [Chen, Hongyan; Zhang, Xiaoting; Su, Hao; Zeng, Judeng; Chan, Hung; Li, Qing; Liu, Xiaodong; Zhang, Lin; Wu, William Ka Kei; Chan, Matthew Tak Vai; Chen…	Chinese University of Hong Kong; Chinese University of Hong Kong; The Chinese University of Hong Kong, Shenzhen; CUHK Shenzhen Research Institute; Chinese University of Hong Kong; Chinese University of Hong Kong	Chan, MTV; Chen, HR (corresponding author), Chinese Univ Hong Kong, Dept Anaesthesia & Intens Care, Hong Kong, Peoples R China.;Chan, MTV; Chen, HR (corresponding author), Chinese Univ Hong Kong, Peter Hung Pain Res Inst, Hong Kong, Peoples R China.	mtvchan@cuhk.edu.hk; hchen2@cuhk.edu.hk	152	8	8	WILEY	HOBOKEN	WIRES RNA	MAY	2023	14	10.1002/wrna.1764	http://dx.doi.org/10.1002/wrna.1764	Cell Biology	Science Citation Index Expanded (SCI-EXPANDED)	36149809	View Full Record in Web of Science
J	Gu, Chenzheng; Li, Caiyun; Wang, Weiwei; Yan, Wenhui; Yao, Yiwen; Shi, Meng; Han, Fei; Shang, Anquan	Immune Infiltration and N(6)-Methyladenosine ncRNA Isoform Detection in Acute Lung Injury	JOURNAL OF ONCOLOGY	English	Article		ACUTE RESPIRATORY-DISTRESS; FAMILY	Acute lung injury (ALI) is a severe form of sepsis that is associated with a high rate of morbidity and death in critically ill individuals. The emergence of ALI is the result of several factors at work. Case mortality rates might range from 40% to 70%. Researchers have discovered that epigenetic alterations are important in the pathophysiology of ALI and that using epigenetic inhibitors may help…	[Gu, Chenzheng; Shang, Anquan] Tongji Univ, Shanghai Tongji Hosp, Sch Med, Dept Lab Med, Shanghai 200065, Peoples R China; [Li, Caiyun] Jiangsu Peoples Hosp, Dept Lab Med, Pukou Branch, Nanjing 211800, Jiangsu, Peoples R China; [Li, Caiyun] Nanjing Pukou Dictrict Cent Hosp, Dept Lab Med, Nanjing 211800, Jiangsu, Peoples R China; [Wang, Weiwei] Tinghu Peoples Hosp Yancheng City, Dept Pathol, Yanch…	Tongji University; Universitatsklinikum des Saarlandes; Fudan University; Nanjing Medical University	Shang, AQ (corresponding author), Tongji Univ, Shanghai Tongji Hosp, Sch Med, Dept Lab Med, Shanghai 200065, Peoples R China.;Shi, M (corresponding author), Fudan Univ, Huashan Hosp, Dept Cardiothorac Surg, Shanghai 200040, Peoples R China.;Han, F (corresponding author), Nanjing Med Univ, Dept Lab Med, Affiliated Hosp 4, Nanjing 210031, Jiangsu, Peoples R China.	guchenzheng@tongji.edu.cn; caiyunliv@163.com; wangweiwei715@gmail.com; wh_yan@yeah.net; yiwen.yao@uks.eu; mengshifd@126.com; feihanvipp@163.com; shanganquan@tongji.edu.cn	33	2	2	HINDAWI LTD	LONDON	J ONCOL	JUN 30	2022	2022	10.1155/2022/3922299	http://dx.doi.org/10.1155/2022/3922299	Oncology	Science Citation Index Expanded (SCI-EXPANDED)	35813860	View Full Record in Web of Science
J	Gu, Chenzheng; Wu, Junlu; Zhang, Wei; Yao, Yiwen; Yan, Wenhui; Yuan, Yi; Wang, Weiwei; Shang, Anquan	Immune Infiltration of Ulcerative Colitis and Detection of the m6A Subtype	JOURNAL OF IMMUNOLOGY RESEARCH	English	Article		INFLAMMATORY-BOWEL-DISEASE; PROTEIN; CELLS; MICE; IBD; WRN	Ulcerative colitis (UC) is an inflammatory bowel disease characterized by persistent colon inflammation. N6-methyladenosine (m6A) methylation is one of the most prevalent RNA modifications with key roles in both normal and illness, but m6A methylation in ulcerative colitis is unknown. This research investigated m6A methylation in UC. We examined the expression of known m6A RNA methylation regulat…	[Gu, Chenzheng; Wu, Junlu; Zhang, Wei; Yuan, Yi; Shang, Anquan] Tongji Univ, Shanghai Tongji Hosp, Sch Med, Dept Lab Med, Shanghai 200065, Peoples R China; [Yao, Yiwen] Saarland Univ Hosp, Dept Internal Med V Pulmol Allergol & Resp Intens, D-66424 Homburg, Germany; [Yan, Wenhui] Tongji Univ, Yangzhi Rehabil Hosp, Shanghai Sunshine Rehabil Ctr, Dept Lab Med,Sch Med, 2209 Guangxing Rd, Shanghai 201…	Tongji University; Universitatsklinikum des Saarlandes; Tongji University	Shang, AQ (corresponding author), Tongji Univ, Shanghai Tongji Hosp, Sch Med, Dept Lab Med, Shanghai 200065, Peoples R China.;Wang, WW (corresponding author), Tinghu Peoples Hosp Yancheng City, Dept Pathol, Yancheng 224005, Peoples R China.	guchenzheng@tongji.edu.cn; wujunlu@tongji.edu.cn; zhangwei@dobai-bio.cn; yiwen.yao@uks.eu; wh_yan@yeah.net; yuanyisdu@126.com; wangweiwei715@gmail.com; shanganquan@tongji.edu.cn	36	10	10	HINDAWI LTD	LONDON	J IMMUNOL RES	JUN 25	2022	2022	10.1155/2022/7280977	http://dx.doi.org/10.1155/2022/7280977	Immunology	Science Citation Index Expanded (SCI-EXPANDED)	35795532	View Full Record in Web of Science
J	Jabs, Sabrina; Biton, Anne; Becavin, Christophe; Nahori, Marie-Anne; Ghozlane, Amine; Pagliuso, Alessandro; Spano, Giulia; Guerineau, Vincent; Touboul, David; Gianetto, Quentin Giai; Chaze, Thibault; Matondo, Mariette; Dillies, Marie-Agnes; Cossart, Pascale	Impact of the gut microbiota on the m6A epitranscriptome of mouse cecum and liver	NATURE COMMUNICATIONS	English	Article		MESSENGER-RNA METHYLATION; AKKERMANSIA-MUCINIPHILA; COMPREHENSIVE ANALYSIS; FTO GENE; HOST; N-6-METHYLADENOSINE; METABOLISM; DISCOVERY; REVEALS; METTL16	The intestinal microbiota modulates host physiology and gene expression via mechanisms that are not fully understood. Here we examine whether host epitranscriptomic marks are affected by the gut microbiota. We use methylated RNA-immunoprecipitation and sequencing (MeRIP-seq) to identify N6-methyladenosine (m(6)A) modifications in mRNA of mice carrying conventional, modified, or no microbiota. We …	[Jabs, Sabrina; Nahori, Marie-Anne; Pagliuso, Alessandro; Spano, Giulia; Cossart, Pascale] Inst Pasteur, U604, INSERM, Unite Interact Bacteries Cellules,USC Inst Natl R, 25 Rue Dr Roux, F-75015 Paris, France; [Biton, Anne; Becavin, Christophe; Ghozlane, Amine; Gianetto, Quentin Giai; Dillies, Marie-Agnes] Inst Pasteur, Dept Biol Computat, Hub Bioinformat & Biostat, USR 3756,CNRS, 28 Rue Dr Roux, …	Institut National de la Sante et de la Recherche Medicale (Inserm); Pasteur Network; Universite Paris Cite; Institut Pasteur Paris; Centre National de la Recherche Scientifique (CNRS); CNRS - National Institute for Biology (INSB); Pasteur Network; Universite Paris Cite; Institut Pasteur Paris; Universite Paris Cite; Universite Paris Saclay; Centre National de la Recherche Scientifique (CNRS); CNR…	Jabs, S; Cossart, P (corresponding author), Inst Pasteur, U604, INSERM, Unite Interact Bacteries Cellules,USC Inst Natl R, 25 Rue Dr Roux, F-75015 Paris, France.	sabrina.jabs@pasteur.fr; pcossart@pasteur.fr	108	65	72	NATURE PORTFOLIO	BERLIN	NAT COMMUN	MAR 12	2020	11	10.1038/s41467-020-15126-x	http://dx.doi.org/10.1038/s41467-020-15126-x	Multidisciplinary Sciences	Science Citation Index Expanded (SCI-EXPANDED)	32165618	View Full Record in Web of Science
J	He, Yuchen; Xing, Jia; Wang, Shiyue; Xin, Shijie; Han, Yanshuo; Zhang, Jian	Increased m6A methylation level is associated with the progression of human abdominal aortic aneurysm	ANNALS OF TRANSLATIONAL MEDICINE	English	Article	Abdominal aortic aneurysm (AAA); N6-methyladenosine modification (m6A modification); N6-methyladenosine RNA methyltransferase (m6A RNA methyltransferase); epigenetics	MESSENGER-RNA; PRACTICE GUIDELINES; M(6)A; MANAGEMENT; MONOCYTES; SOCIETY; CELLS	Background: The role of N6-methyladenosine (m6A) modification in abdominal aortic aneurysm (AAA) has not been extensively studied. This study therefore aimed to investigate m6A RNA methylation and the expressions of the corresponding modulators in AAA. Methods: A comparative study between AAA tissue samples (n=32) and healthy aortas (n=12) was performed using m6A methylation quantification for me…	[He, Yuchen; Wang, Shiyue; Xin, Shijie; Zhang, Jian] China Med Univ, Hosp 1, Dept Vasc Surg, Key Lab Pathogenesis Prevent & Therapeut Aort Ane, Shenyang 110001, Liaoning, Peoples R China; [Xing, Jia] China Med Univ, Dept Histol & Embryol, Shenyang 110122, Liaoning, Peoples R China; [Han, Yanshuo] China Med Univ, Dept Gen Surg, Shengjing Hosp, Shenyang 110004, Liaoning, Peoples R China; [Han, Yans…	China Medical University; China Medical University; China Medical University	Zhang, J (corresponding author), China Med Univ, Hosp 1, Dept Vasc Surg, Key Lab Pathogenesis Prevent & Therapeut Aort Ane, Shenyang 110001, Liaoning, Peoples R China.;Han, YS (corresponding author), China Med Univ, Dept Gen Surg, Shengjing Hosp, Shenyang 110004, Liaoning, Peoples R China.	yanshuohan@cmu.edu.cn; jianzhang@cmu.edu.cn	39	55	56	AME PUBLISHING COMPANY	SHATIN	ANN TRANSL MED	DEC	2019	7	10.21037/atm.2019.12.65	http://dx.doi.org/10.21037/atm.2019.12.65	Oncology; Medicine, Research & Experimental	Science Citation Index Expanded (SCI-EXPANDED)	32042813	View Full Record in Web of Science
J	Dubey, Praveen K.; Patil, Mallikarjun; Singh, Sarojini; Dubey, Shubham; Ahuja, Paras; Verma, Suresh Kumar; Krishnamurthy, Prasanna	Increased m6A-RNA methylation and FTO suppression is associated with myocardial inflammation and dysfunction during endotoxemia in mice	MOLECULAR AND CELLULAR BIOCHEMISTRY	English	Article	Endotoxemia; Cardiac dysfunction; RNA methylation; Sepsis; FTO	CARDIAC DYSFUNCTION; MESSENGER-RNA; SEPSIS; PROGRESSION; MORTALITY; METTL3	Endotoxemia triggers life-threatening immune and cardiovascular response that leads to tissue damage, multi-organ failure, and death. The understanding of underlying molecular mechanisms is still evolving. N6-methyladenosine (m6A)-RNA modification plays key regulatory role in numerous biological processes. However, it remains unclear whether endotoxemia alters RNA methylation in the myocardium. I…	[Dubey, Praveen K.; Patil, Mallikarjun; Singh, Sarojini; Dubey, Shubham; Krishnamurthy, Prasanna] Univ Alabama Birmingham, Sch Med & Sch Engn, Dept Biomed Engn, Birmingham, AL 35294 USA; Univ Alabama Birmingham, Sci & Technol Honors Coll, Birmingham, AL 35294 USA; Univ Alabama Birmingham, Sch Med, Div Cardiovasc Dis, Birmingham, AL 35294 USA	University of Alabama System; University of Alabama Birmingham; University of Alabama System; University of Alabama Birmingham; University of Alabama System; University of Alabama Birmingham	Krishnamurthy, P (corresponding author), Univ Alabama Birmingham, Sch Med & Sch Engn, Dept Biomed Engn, Birmingham, AL 35294 USA.	prasanak@uab.edu	25	48	48	SPRINGER	DORDRECHT	MOL CELL BIOCHEM	JAN	2022	477	10.1007/s11010-021-04267-2	http://dx.doi.org/10.1007/s11010-021-04267-2	Cell Biology	Science Citation Index Expanded (SCI-EXPANDED)	34581943	View Full Record in Web of Science
J	Ma, Jun; Wang, Xiaotang; Yang, Xue; Wang, Xi; Tan, Tongshan; Fang, Hongping; Zhong, Yu; Zhang, Qi	Increased METTL3 expression and m6A RNA methylation may contribute to the development of dry eye in primary Sjogren's syndrome	BMC OPHTHALMOLOGY	English	Article	Primary Sjogren's syndrome; Dry eye; N6-methyladenosine; METTL3	PATHOGENESIS; WRITERS	BackgroundPrimary Sjogren's syndrome (pSS) is a chronic autoimmune disorder defined by xerostomia and keratoconjunctivitis sicca, and its etiology remains unknown. N6-methyladenosine (m(6)A) is the predominant posttranscriptional modification in eukaryotic mRNAs and is dynamically regulated by m(6)A regulators. Dysregulation of m(6)A modification is closely associated with several autoimmune diso…	[Ma, Jun; Wang, Xiaotang; Yang, Xue; Wang, Xi; Tan, Tongshan; Fang, Hongping; Zhang, Qi] Chongqing Med Univ, Affiliated Hosp 1, Chongqing, Peoples R China; [Ma, Jun; Wang, Xiaotang; Yang, Xue; Wang, Xi; Tan, Tongshan; Fang, Hongping; Zhang, Qi] Chongqing Key Lab Ophthalmol, Chongqing, Peoples R China; [Ma, Jun; Wang, Xiaotang; Yang, Xue; Wang, Xi; Tan, Tongshan; Fang, Hongping; Zhang, Qi] Chongqi…	Chongqing Medical University; Chongqing Medical University	Zhang, Q (corresponding author), Chongqing Med Univ, Affiliated Hosp 1, Chongqing, Peoples R China.;Zhang, Q (corresponding author), Chongqing Key Lab Ophthalmol, Chongqing, Peoples R China.;Zhang, Q (corresponding author), Chongqing Eye Inst, Chongqing, Peoples R China.;Zhang, Q (corresponding author), Natl Clin Res Ctr Ocular Dis, Chongqing Branch, Chongqing, Peoples R China.;Zhong, Y (correspo…	yuyumou@sina.com; cqzqwxm@163.com	34	0	0	BMC	LONDON	BMC OPHTHALMOL	JUN 5	2023	23	10.1186/s12886-023-02988-0	http://dx.doi.org/10.1186/s12886-023-02988-0	Ophthalmology	Science Citation Index Expanded (SCI-EXPANDED)	37277716	View Full Record in Web of Science
J	Leseva, Milena N.; Buttari, Brigitta; Saso, Luciano; Dimitrova, Petya A.	Infection Meets Inflammation: N6-Methyladenosine, an Internal Messenger RNA Modification as a Tool for Pharmacological Regulation of Host-Pathogen Interactions	BIOMOLECULES	English	Review	epitranscriptome; N6-methyladenosine; m6A; host-pathogen interactions; immune cells; infectious disease; viral infection	HEMATOPOIETIC STEM; ADENOSYLHOMOCYSTEINE HYDROLASE; ANTIVIRAL ACTIVITY; GENE-EXPRESSION; M(6)A; METHYLATION; VIRUS; 3-DEAZAADENOSINE; N-6-METHYLADENOSINE; METHYLTRANSFERASE	The significance of internal mRNA modifications for the modulation of transcript stability, for regulation of nuclear export and translation efficiency, and their role in suppressing innate immunity is well documented. Over the years, the molecular complexes involved in the dynamic regulation of the most prevalent modifications have been characterized-we have a growing understanding of how each m…	[Leseva, Milena N.; Dimitrova, Petya A.] Bulgarian Acad Sci, Stephan Angeloff Inst Microbiol, Dept Immunol, Lab Expt Immunotherapy, Sofia 1113, Bulgaria; [Buttari, Brigitta] Ist Super Sanita, Dept Cardiovasc & Endocrine Metab Dis & Aging, I-00161 Rome, Italy; [Saso, Luciano] Univ Roma La Sapienza, Dept Physiol & Pharmacol Vittorio Erspamer, I-00185 Rome, Italy	Bulgarian Academy of Sciences; Stephan Angeloff Institute of Microbiology, Bulgarian Academy of Sciences; Istituto Superiore di Sanita (ISS); Sapienza University Rome	Leseva, MN (corresponding author), Bulgarian Acad Sci, Stephan Angeloff Inst Microbiol, Dept Immunol, Lab Expt Immunotherapy, Sofia 1113, Bulgaria.	mlesseva@microbio.bas.bg; brigitta.buttari@iss.it; luciano.saso@uniroma1.it; petya_dimitrova@web.de	93	2	2	MDPI	BASEL	BIOMOLECULES	JUL	2023	13	10.3390/biom13071060	http://dx.doi.org/10.3390/biom13071060	Biochemistry & Molecular Biology	Science Citation Index Expanded (SCI-EXPANDED)	37509095	View Full Record in Web of Science
J	Quan, Wei; Li, Jia; Liu, Li; Zhang, Qinghui; Qin, Yidan; Pei, Xiaochen; Chen, Jiajun	Influence of N6-Methyladenosine Modification Gene HNRNPC on Cell Phenotype in Parkinson's Disease	PARKINSONS DISEASE	English	Article		MESSENGER-RNA; TRANSLATION; PROTEINS; M(6)A	This study aimed to explore the N6-methyladenosine (m6A) modification genes involved in the pathogenesis of Parkinson's disease (PD) through data analysis of the two data sets GSE120306 and GSE22491 in the GEO database and further explore its influence on cell phenotype in PD. We analyzed the differentially expressed genes and function enrichment analysis of the two sets of data and found that th…	[Quan, Wei; Li, Jia; Liu, Li; Zhang, Qinghui; Qin, Yidan; Pei, Xiaochen; Chen, Jiajun] Jilin Univ, Dept Neurol, China Japan Union Hosp, Dept Neurol, 126 Xian Tai Rd, Changchun 130000, Jilin, Peoples R China	Jilin University	Chen, JJ (corresponding author), Jilin Univ, Dept Neurol, China Japan Union Hosp, Dept Neurol, 126 Xian Tai Rd, Changchun 130000, Jilin, Peoples R China.	weiquan20@mails.jlu.edu.cn; lijia33233@jlu.edu.cn; liuli19@mails.jlu.edu.cn; zhangqh19@mails.jlu.edu.cn; qinyd20@mails.jlu.edu.cn; peixc20@mails.jlu.edu.cn; cjj@jlu.edu.cn	49	11	13	HINDAWI LTD	LONDON	PARKINSONS DIS-US	DEC 20	2021	2021	10.1155/2021/9919129	http://dx.doi.org/10.1155/2021/9919129	Clinical Neurology	Science Citation Index Expanded (SCI-EXPANDED)	34966539	View Full Record in Web of Science
J	Chen, Juntao; Xu, Cuidi; Yang, Kun; Gao, Rifeng; Cao, Yirui; Liang, Lifei; Chen, Siyue; Xu, Shihao; Rong, Ruiming; Wang, Jina; Zhu, Tongyu	Inhibition of ALKBH5 attenuates I/R-induced renal injury in male mice by promoting Ccl28 m6A modification and increasing Treg recruitment	NATURE COMMUNICATIONS	English	Article		CHRONIC KIDNEY-DISEASE; ISCHEMIA-REPERFUSION INJURY; REGULATORY T-CELLS; RNA; DEMETHYLASE; M(6)A; ANGIOGENESIS; METHYLATION; PREVALENCE; FIBROSIS	m6A modification has been reported to play roles in many developmental and pathological processes, but its role in AKI remains poorly understood. Here, the authors show the role and the mechanism of the m6A demethylase, ALKBH5 on IRI induced AKI. Ischemia reperfusion injury (IRI) is a common cause of acute kidney injury (AKI). The role of N(6-)methyladenosine (m6A) modification in AKI remains unc…	[Chen, Juntao; Xu, Cuidi; Cao, Yirui; Liang, Lifei; Chen, Siyue; Xu, Shihao; Rong, Ruiming; Wang, Jina; Zhu, Tongyu] Fudan Univ, Zhongshan Hosp, Dept Urol, Shanghai, Peoples R China; [Chen, Juntao; Xu, Cuidi; Cao, Yirui; Liang, Lifei; Chen, Siyue; Xu, Shihao; Rong, Ruiming; Wang, Jina; Zhu, Tongyu] Shanghai Key Lab Organ Transplantat, Shanghai, Peoples R China; [Zhu, Tongyu] Fudan Univ, Shanghai …	Fudan University; Fudan University; Fudan University; Fudan University	Rong, RM; Wang, JN; Zhu, TY (corresponding author), Fudan Univ, Zhongshan Hosp, Dept Urol, Shanghai, Peoples R China.;Rong, RM; Wang, JN; Zhu, TY (corresponding author), Shanghai Key Lab Organ Transplantat, Shanghai, Peoples R China.;Zhu, TY (corresponding author), Fudan Univ, Shanghai Med Coll, Shanghai, Peoples R China.	rong.ruiming@zs-hospital.sh.cn; wang.jina@zs-hospital.sh.cn; zhu.tongyu@zs-hospital.sh.cn	50	42	42	NATURE PORTFOLIO	BERLIN	NAT COMMUN	MAR 1	2023	14	10.1038/s41467-023-36747-y	http://dx.doi.org/10.1038/s41467-023-36747-y	Multidisciplinary Sciences	Science Citation Index Expanded (SCI-EXPANDED)	36859428	View Full Record in Web of Science
J	Wang, Jia-Nan; Wang, Fang; Ke, Jing; Li, Zeng; Xu, Chuan-Hui; Yang, Qin; Chen, Xin; He, Xiao-Yan; He, Yuan; Suo, Xiao-Guo; Li, Chao; Yu, Ju-Tao; Jiang, Ling; Ni, Wei-Jian; Jin, Juan; Liu, Ming-Ming; Shao, Wei; Yang, Chen; Gong, Qian; Chen, Hai-Yong; Li, Jun; Wu, Yong-Gui; Meng, Xiao-Ming	Inhibition of METTL3 attenuates renal injury and inflammation by alleviating TAB3 m6A modifications via IGF2BP2-dependent mechanisms	SCIENCE TRANSLATIONAL MEDICINE	English	Article		TUBULAR EPITHELIAL-CELLS; M(6)A METHYLATION; GENE-EXPRESSION; C-JUN; RNA; N-6-METHYLADENOSINE; TRANSCRIPTION	The role of N-6-methyladenosine (m6A) modifications in renal diseases is largely unknown. Here, we characterized the role of N-6-adenosine-methyltransferase-like 3 (METTL3), whose expression is elevated in renal tubules in different acute kidney injury (AKI) models as well as in human biopsies and cultured tubular epithelial cells (TECs). METTL3 silencing alleviated renal inflammation and program…	[Wang, Jia-Nan; Wang, Fang; Li, Zeng; Xu, Chuan-Hui; Yang, Qin; Chen, Xin; He, Xiao-Yan; He, Yuan; Suo, Xiao-Guo; Li, Chao; Yu, Ju-Tao; Ni, Wei-Jian; Liu, Ming-Ming; Li, Jun; Meng, Xiao-Ming] Anhui Med Univ, Inflammat & Immune Mediated Dis Lab Anhui Prov, Key Lab Antiinflammatory Immune Med, Sch Pharm,Anhui Inst Innovat Drugs,Minist Educ, Hefei 230032, Peoples R China; [Wang, Fang] Anhui Med Univ…	Anhui Medical University; Anhui Medical University; Anhui Medical University; Anhui Medical University; Anhui Medical University; Guangdong Medical University; Anhui Medical University; University of Hong Kong	Meng, XM (corresponding author), Anhui Med Univ, Inflammat & Immune Mediated Dis Lab Anhui Prov, Key Lab Antiinflammatory Immune Med, Sch Pharm,Anhui Inst Innovat Drugs,Minist Educ, Hefei 230032, Peoples R China.;Wu, YG (corresponding author), Anhui Med Univ, Dept Nephropathy, Affiliated Hosp 1, Hefei 230032, Peoples R China.	wuyonggui@medmail.com.cn; mengxiaoming@ahmu.edu.cn	50	117	119	AMER ASSOC ADVANCEMENT SCIENCE	WASHINGTON	SCI TRANSL MED	APR 13	2022	14	10.1126/scitranslmed.abk2709	http://dx.doi.org/10.1126/scitranslmed.abk2709	Cell Biology; Medicine, Research & Experimental	Science Citation Index Expanded (SCI-EXPANDED)	35417191	View Full Record in Web of Science
J	Tang, Hanfeng; Huang, Liwei; Hu, Jianzhang	Inhibition of the m6A Methyltransferase METTL3 Attenuates the Inflammatory Response in Fusarium solani-Induced Keratitis via the NF-κB Signaling Pathway	INVESTIGATIVE OPHTHALMOLOGY & VISUAL SCIENCE	English	Article	fungal keratitis (FK); Fusarium solani; METTL3; m6A; NF-kappa B pathway	METHYLATION	PURPOSE. The purpose of this study was to elucidate the effect of methyltransferase-like enzyme 3 (METTL3) on inflammation and the NF-kappa B signaling pathway in fungal keratitis (FK). METHODS. We established corneal stromal cell models and FK mouse models by incubation with Fusarium solani. The overall RNA N6-methyladenosine (m6A) level was determined using an m6A RNA methylation assay kit. The…	[Tang, Hanfeng; Huang, Liwei; Hu, Jianzhang] Fujian Med Univ Union Hosp, Dept Ophthalmol, 29 Xinquan Rd, Fuzhou 350005, Peoples R China		Hu, JZ (corresponding author), Fujian Med Univ Union Hosp, Dept Ophthalmol, 29 Xinquan Rd, Fuzhou 350005, Peoples R China.	ophhjz@163.com	49	4	4	ASSOC RESEARCH VISION OPHTHALMOLOGY INC	ROCKVILLE	INVEST OPHTH VIS SCI	OCT	2022	63	10.1167/iovs.63.11.2	http://dx.doi.org/10.1167/iovs.63.11.2	Ophthalmology	Science Citation Index Expanded (SCI-EXPANDED)	36194423	View Full Record in Web of Science
J	Zhang, YanJun; Zhan, Lijuan; Li, Jing; Jiang, Xue; Yin, Li	Insights into N6-methyladenosine (m6A) modification of noncoding RNA in tumor microenvironment	AGING-US	English	Review	m6A; ncRNA; tumor microenvironment; tumor metastasis; exosome; biomarker; targeted therapy	CANCER-ASSOCIATED FIBROBLASTS; REGULATORY T-CELLS; STEM-LIKE CELLS; MESSENGER-RNA; BREAST-CANCER; NUCLEAR-RNA; N-6-METHYLADENOSINE RNA; SUPPRESSOR-CELLS; LIPID-METABOLISM; LUNG-CANCER	N6-methyladenosine (m6A) is the most abundant RNA modification in eukaryotes, and it participates in the regulation of pathophysiological processes in various diseases, including malignant tumors, by regulating the expression and function of both coding and non-coding RNAs (ncRNAs). More and more studies demonstrated that m6A modification regulates the production, stability, and degradation of nc…	[Zhang, YanJun; Zhan, Lijuan; Li, Jing; Jiang, Xue] Jiangsu Coll Nursing, Coll Pharm & Tradit Chinese Med, Huaian 223005, Jiangsu, Peoples R China; [Yin, Li] Yulin Normal Univ, Dept Biopharmaceut, Yulin 537000, Guangxi, Peoples R China; [Yin, Li] Yulin Normal Univ, Bioengn & Technol Ctr Native Med Resources Dev, Yulin 537000, Peoples R China	Yulin Normal University; Yulin Normal University	Yin, L (corresponding author), Yulin Normal Univ, Dept Biopharmaceut, Yulin 537000, Guangxi, Peoples R China.;Yin, L (corresponding author), Yulin Normal Univ, Bioengn & Technol Ctr Native Med Resources Dev, Yulin 537000, Peoples R China.	yinli@ylu.edu.cn	205	2	2	IMPACT JOURNALS LLC	ORCHARD PARK	AGING-US	MAY 15	2023	15			Cell Biology; Geriatrics & Gerontology	Science Citation Index Expanded (SCI-EXPANDED)	37178254	View Full Record in Web of Science
J	Cao, Yudong; Zhu, Hecheng; Chen, Quan; Huang, Hailong; Xie, Dongcheng; Li, Xuewen; Jiang, Xingjun; Ren, Caiping; Peng, Jiahui	Integrated analysis of inflammatory response subtype-related signature to predict clinical outcomes, immune status and drug targets in lower-grade glioma	FRONTIERS IN PHARMACOLOGY	English	Article	lower-grade glioma; inflammatory response; immune characteristics; prognostic signature; drug targets	CANCER; CELLS; MACROPHAGES; EXPRESSION; RECEPTOR	Background: The inflammatory response in the tumor immune microenvironment has implications for the progression and prognosis in glioma. However, few inflammatory response-related biomarkers for lower-grade glioma (LGG) prognosis and immune infiltration have been identified. We aimed to construct and identify the prognostic value of an inflammatory response-related signature, immune infiltration,…	[Cao, Yudong; Chen, Quan; Huang, Hailong; Xie, Dongcheng; Jiang, Xingjun] Cent South Univ, Xiangya Hosp, Natl Clin Res Ctr Geriatr Disorders, Dept Neurosurg, Changsha, Peoples R China; [Zhu, Hecheng; Li, Xuewen] Changsha Kexin Canc Hosp, Changsha, Peoples R China; [Ren, Caiping] Cent South Univ, Canc Res Inst, Sch Basic Med Sci, Key Lab Carcinogenesis,Chinese Minist Hlth, Changsha, Peoples R Chin…	Central South University; Central South University; Sun Yat Sen University	Jiang, XJ (corresponding author), Cent South Univ, Xiangya Hosp, Natl Clin Res Ctr Geriatr Disorders, Dept Neurosurg, Changsha, Peoples R China.;Ren, CP (corresponding author), Cent South Univ, Canc Res Inst, Sch Basic Med Sci, Key Lab Carcinogenesis,Chinese Minist Hlth, Changsha, Peoples R China.;Peng, JH (corresponding author), Sun Yat sen Univ, Affiliated Hosp 7, Dept Ultrasound, Shenzhen, Peo…	jiangxj@csu.edu.cn; rencaiping@csu.edu.cn; pengjh29@mail.sysu.edu.cn	52	4	4	FRONTIERS MEDIA SA	LAUSANNE	FRONT PHARMACOL	AUG 26	2022	13	10.3389/fphar.2022.914667	http://dx.doi.org/10.3389/fphar.2022.914667	Pharmacology & Pharmacy	Science Citation Index Expanded (SCI-EXPANDED)	36091778	View Full Record in Web of Science
J	Shen, Jianxiao; Wang, Wanpeng; Shao, Xinghua; Wu, Jingkui; Li, Shu; Che, Xiajing; Ni, Zhaohui	Integrated Analysis of m6A Methylome in Cisplatin-Induced Acute Kidney Injury and Berberine Alleviation in Mouse	FRONTIERS IN GENETICS	English	Article	M6A; cisplatin induced nephrotoxicity; berberine; FGA; Havcr1	RNA; N-6-METHYLADENOSINE; N6-METHYLADENOSINE; COTRANSPORTER; METABOLISM	Background N6-methyladenosine (m6A) is the most abundant modification known in mRNAs. It participates in a variety of physiological and pathological processes, such as metabolism, inflammation, and apoptosis. Aims To explore the mechanism of m6A in cisplatin-induced acute kidney injury (AKI) and berberine alleviation in mouse. Methods This study investigated the N6-methyladenosine (m6A) methylome…	[Shen, Jianxiao; Shao, Xinghua; Wu, Jingkui; Li, Shu; Che, Xiajing; Ni, Zhaohui] Shanghai Jiao Tong Univ, Renji Hosp, Dept Nephrol, Sch Med, Shanghai, Peoples R China; [Wang, Wanpeng] Lianshui Peoples Hosp, Dept Nephrol, Lianshui, Peoples R China	Shanghai Jiao Tong University	Che, XJ; Ni, ZH (corresponding author), Shanghai Jiao Tong Univ, Renji Hosp, Dept Nephrol, Sch Med, Shanghai, Peoples R China.	chexj@126.com; profnizh@126.com	65	25	26	FRONTIERS MEDIA SA	LAUSANNE	FRONT GENET	NOV 20	2020	11	10.3389/fgene.2020.584460	http://dx.doi.org/10.3389/fgene.2020.584460	Genetics & Heredity	Science Citation Index Expanded (SCI-EXPANDED)	33329722	View Full Record in Web of Science
J	Zeng, Yunhong; Huang, Ting; Zuo, Wanyun; Wang, Dan; Xie, Yonghui; Wang, Xun; Xiao, Zhenghui; Chen, Zhi; Liu, Qiming; Liu, Na; Xiao, Yunbin	Integrated analysis of m6A mRNA methylation in rats with monocrotaline-induced pulmonary arterial hypertension	AGING-US	English	Article	pulmonary arterial hypertension; N6-methyladenosine; FTO; YTHDF1	COLLAGEN	Background: N6-methyladenosine (m(6)A) modification is one of the most common chemical modifications of eukaryotic mRNAs, which play an important role in tumors and cardiovascular disease through regulating mRNA stability, splicing and translation. However, the changes of m(6)A mRNA and m(6)A-related enzymes in pulmonary arterial hypertension (PAH) remain largely unexplored. Methods: MeRIP-seq wa…	[Zeng, Yunhong; Huang, Ting; Xie, Yonghui] Univ South China, Acad Pediat, Changsha 410007, Peoples R China; [Zeng, Yunhong; Wang, Dan; Xie, Yonghui; Wang, Xun; Chen, Zhi; Xiao, Yunbin] Hunan Childrens Hosp, Dept Cardiol, Changsha 410007, Peoples R China; [Huang, Ting] Hunan Childrens Hosp, Dept Utrasound, Changsha 410007, Peoples R China; [Zuo, Wanyun; Liu, Qiming; Liu, Na] Cent South Univ, Xiang…	University of South China; Central South University	Xiao, YB (corresponding author), Hunan Childrens Hosp, Dept Cardiol, Changsha 410007, Peoples R China.;Liu, N (corresponding author), Cent South Univ, Xiangya Hosp 2, Dept Cardiovasc Med, Changsha 410011, Peoples R China.	naliu1025@csu.edu.cn; xiaoyunbinrui@126.com	57	23	23	IMPACT JOURNALS LLC	ORCHARD PARK	AGING-US	JUL 31	2021	13			Cell Biology; Geriatrics & Gerontology	Science Citation Index Expanded (SCI-EXPANDED)	34310344	View Full Record in Web of Science
J	Li, Shuangjing; Zhou, Han; Liang, Yufen; Yang, Qian; Zhang, Jiachen; Shen, Weitong; Lei, Lijian	Integrated analysis of transcriptome-wide m6A methylation in a Cd-induced kidney injury rat model	ECOTOXICOLOGY AND ENVIRONMENTAL SAFETY	English	Article	M6A methylation; MeRIP-seq; RNA-seq; PPI network; CdCl2-induced kidney injury	TRANSPORTERS; EXPRESSION	Background: Accumulating evidence has demonstrated that N6-methyladenosine (m6A) plays important roles in a variety of diseases. However, the specific functions of m6A in CdCl2-induced kidney injury remain unclear. Objective: Here, we investigate a transcriptome-wide map of m6A modifications and explore the effects of m6A on Cd-induced kidney injury. Materials and methods: The rat kidney injury m…	[Li, Shuangjing; Zhou, Han; Liang, Yufen; Yang, Qian; Zhang, Jiachen; Shen, Weitong; Lei, Lijian] Shanxi Med Univ, Sch Publ Hlth, Dept Epidemiol, Taiyuan 030001, Peoples R China	Shanxi Medical University	Lei, LJ (corresponding author), Shanxi Med Univ, Sch Publ Hlth, Dept Epidemiol, Taiyuan 030001, Peoples R China.	wwdlijian@sxmu.edu.cn	40	2	2	ACADEMIC PRESS INC ELSEVIER SCIENCE	SAN DIEGO	ECOTOX ENVIRON SAFE	MAY	2023	256	10.1016/j.ecoenv.2023.114903	http://dx.doi.org/10.1016/j.ecoenv.2023.114903	Environmental Sciences; Toxicology	Science Citation Index Expanded (SCI-EXPANDED)	37054473	View Full Record in Web of Science
J	Tan, Xinjie; Li, Qian; Zhang, Qinya; Fan, Gang; Liu, Zhuo; Zhou, Kunyan	Integrative Analysis Reveals Potentially Functional N6-Methylandenosine-Related Long Noncoding RNAs in Colon Adenocarcinoma	FRONTIERS IN GENETICS	English	Article	N6-methylAdenosine (m6A); colon adenocarcinoma; long noncoding RNAs; metabolic reprogramming; m6A-related lncRNAs	CANCER PROGRESSION; METHYLATION; PACKAGE	N6-methyladenosine (m6A) is one of the most prevalent RNA modifications in mRNA and non-coding RNA. In this study, we identified 10 upregulated m6A regulators at both mRNA and protein levels, and 2,479 m6A-related lncRNAs. Moreover, the m6A-related long noncoding RNAs (lncRNAs) could clearly stratify the colon adenocarcinoma (COAD) samples into three subtypes. The subtype 2 had nearly 40% of samp…	[Tan, Xinjie] Nankai Univ, Sch Med, Tianjin, Peoples R China; [Li, Qian] Zheng Zhou Univ, Dept Pediat, Affiliated Hosp 2, Zhengzhou, Peoples R China; [Zhang, Qinya] Heidelberg Univ Hosp, Dept Anesthesiol, Heidelberg, Germany; [Zhang, Qinya] Guizhou Med Univ, Dept Anesthesiol, Affiliated Hosp, Guiyang, Peoples R China; [Fan, Gang; Zhou, Kunyan] Cent South Univ, Hunan Canc Hosp, Affiliated Canc Hos…	Nankai University; Zhengzhou University; Ruprecht Karls University Heidelberg; Guizhou Medical University; Central South University; Huazhong University of Science & Technology; Shenzhen University	Zhou, KY (corresponding author), Cent South Univ, Hunan Canc Hosp, Affiliated Canc Hosp, Xiangya Sch Med, Changsha, Peoples R China.	kunyan.zhou412@gmail.com	35	2	2	FRONTIERS MEDIA SA	LAUSANNE	FRONT GENET	SEP 17	2021	12	10.3389/fgene.2021.739344	http://dx.doi.org/10.3389/fgene.2021.739344	Genetics & Heredity	Science Citation Index Expanded (SCI-EXPANDED)	34603397	View Full Record in Web of Science
J	Wen, Xiaodong; Wang, Junhu; Wang, Qiong; Liu, Peilong; Zhao, Hongmou	Interaction between N6-methyladenosine and autophagy in the regulation of bone and tissue degeneration	FRONTIERS IN BIOENGINEERING AND BIOTECHNOLOGY	English	Review	degenerative; disease; M6A; autophagy; mRNA; osteoporosis		Bone and tissue degeneration are the most common skeletal disorders that seriously affect people's quality of life. N6-methyladenosine (m6A) is one of the most common RNA modifications in eukaryotic cells, affecting the alternative splicing, translation, stability and degradation of mRNA. Interestingly, increasing number of evidences have indicated that m6A modification could modulate the express…	[Wen, Xiaodong; Wang, Junhu; Wang, Qiong; Liu, Peilong; Zhao, Hongmou] Xi An Jiao Tong Univ, Dept Foot & Ankle Surg, Honghui Hosp, Xian, Peoples R China	Xi'an Jiaotong University	Zhao, HM (corresponding author), Xi An Jiao Tong Univ, Dept Foot & Ankle Surg, Honghui Hosp, Xian, Peoples R China.	zhaohongmou@xiyi.edu.cn	61	1	1	FRONTIERS MEDIA SA	LAUSANNE	FRONT BIOENG BIOTECH	AUG 22	2022	10	10.3389/fbioe.2022.978283	http://dx.doi.org/10.3389/fbioe.2022.978283	Biotechnology & Applied Microbiology; Engineering, Biomedical	Science Citation Index Expanded (SCI-EXPANDED)	36072293	View Full Record in Web of Science
J	Yao, Jiali; Song, Yeke; Yu, Xiaoping; Lin, Zhijie	Interaction between N6-methyladenosine modification and the tumor microenvironment in colorectal cancer	MOLECULAR MEDICINE	English	Review	Colorectal cancer; m(6)A; Tumor microenvironment	NUCLEAR-RNA; INTESTINAL INFLAMMATION; DEMETHYLASE; N6-METHYLADENOSINE; INDUCTION; METTL14; CELLS	The incidence and mortality of colorectal cancer (CRC) are rapidly increasing worldwide. Recently, there has been significant attention given to N-6-methyladenosine (m(6)A), the most common mRNA modification, especially for its effects on CRC development. It is important to note that the progression of CRC would be greatly hindered without the tumor microenvironment (TME). The interaction between…	[Yao, Jiali; Song, Yeke; Lin, Zhijie] Yangzhou Univ, Dept Immunol, Inst Translat Med, Med Coll, Yangzhou 225009, Jiangsu, Peoples R China; [Yu, Xiaoping] Yangzhou Univ, Affiliated Hosp, Hlth Management Ctr, Yangzhou 225009, Jiangsu, Peoples R China; [Lin, Zhijie] Yangzhou Univ, Jiangsu Key Lab Expt & Translat Noncoding RNA Res, Yangzhou 225001, Peoples R China	Yangzhou University; Yangzhou University; Yangzhou University	Lin, ZJ (corresponding author), Yangzhou Univ, Dept Immunol, Inst Translat Med, Med Coll, Yangzhou 225009, Jiangsu, Peoples R China.;Lin, ZJ (corresponding author), Yangzhou Univ, Jiangsu Key Lab Expt & Translat Noncoding RNA Res, Yangzhou 225001, Peoples R China.	zjielin@yzu.edu.cn	109	1	1	SPRINGER	NEW YORK	MOL MED	SEP 22	2023	29	10.1186/s10020-023-00726-2	http://dx.doi.org/10.1186/s10020-023-00726-2	Biochemistry & Molecular Biology; Cell Biology; Medicine, Research & Experimental	Science Citation Index Expanded (SCI-EXPANDED)	37737134	View Full Record in Web of Science
J	Zhao, Jiaxun; Lu, Lingeng	Interplay between RNA Methylation Eraser FTO and Writer METTL3 in Renal Clear Cell Carcinoma Patient Survival	RECENT PATENTS ON ANTI-CANCER DRUG DISCOVERY	English	Article	CCRCC; chemokines; DNA methylation; FTO; METTL3; prognosis; RNA methylation	ENDOMETRIAL CANCER; ASPIRIN USE; FAT MASS; RISK; N6-METHYLADENOSINE; OVEREXPRESSION; RECOGNITION	Background: m6A-methyltransferase METTL3 and demethylase FTO regulate gene ex -pression by dynamically modifying RNA methylation. However, their clinical relevance in renal Clear Cell Carcinoma (CCRCC) has not been well elucidated. Objective: This study aims to investigate prognostic values of FTO and METTL3 mRNA and DNA methylation, their differential expression and associations with chemokines …	[Zhao, Jiaxun; Lu, Lingeng] Yale Univ, Yale Canc Ctr, Yale Sch Publ Hlth, Dept Chron Dis Epidemiol, New Haven, CT 06520 USA	Yale University	Lu, LG (corresponding author), Yale Sch Publ Hlth, Dept Chron Dis Epidemiol, 60 Coll St, New Haven, CT 06520 USA.	lingeng.lu@yale.edu	48	11	12	BENTHAM SCIENCE PUBL LTD	SHARJAH	RECENT PAT ANTI-CANC		2021	16	10.2174/1574892816666210204125155	http://dx.doi.org/10.2174/1574892816666210204125155	Oncology; Pharmacology & Pharmacy	Science Citation Index Expanded (SCI-EXPANDED)	33563180	View Full Record in Web of Science
J	Wu, Chenglei; Chen, Weixin; He, Jincan; Jin, Shouheng; Liu, Yukun; Yi, Yang; Gao, Zhuoxing; Yang, Jiayan; Yang, Jianhua; Cui, Jun; Zhao, Wei	Interplay of m6A and H3K27 trimethylation restrains inflammation during bacterial infection	SCIENCE ADVANCES	English	Article		PATTERN-RECOGNITION RECEPTORS; NF-KAPPA-B; GENE-EXPRESSION; RNA; DEMETHYLASE; JMJD3; READERS; WRITERS; ROLES	While N-6-methyladenosine (m(6)A) is the most prevalent modification of eukaryotic messenger RNA (mRNA) involved in various cellular responses, its role in modulating bacteria-induced inflammatory response remains elusive. Here, we showed that loss of the m(6)A reader YTH-domain family 2 (YTHDF2) promoted demethylation of histone H3 lysine-27 trimethylation (H3K27me3), which led to enhanced produ…	[Wu, Chenglei; Chen, Weixin; He, Jincan; Zhao, Wei] Sun Yat Sen Univ, Sun Yat Sen Mem Hosp, RNA Biomed Inst, Guangzhou 510120, Peoples R China; [Wu, Chenglei; Chen, Weixin; He, Jincan; Liu, Yukun; Yi, Yang; Gao, Zhuoxing; Yang, Jiayan; Zhao, Wei] Sun Yat Sen Univ, Zhongshan Sch Med, Key Lab Stem Cells & Tissue Engn, Minist Educ, Guangzhou 510080, Peoples R China; [Jin, Shouheng; Yang, Jianhua; Cu…	Sun Yat Sen University; Sun Yat Sen University; Sun Yat Sen University	Zhao, W (corresponding author), Sun Yat Sen Univ, Sun Yat Sen Mem Hosp, RNA Biomed Inst, Guangzhou 510120, Peoples R China.;Zhao, W (corresponding author), Sun Yat Sen Univ, Zhongshan Sch Med, Key Lab Stem Cells & Tissue Engn, Minist Educ, Guangzhou 510080, Peoples R China.;Yang, JH; Cui, J (corresponding author), Sun Yat Sen Univ, Sch Life Sci, State Key Lab Biocontrol, MOE Key Lab Gene Funct & …	yangjh7@mail.sysu.edu.cn; cuij5@mail.sysu.edu.cn; zhaowei23@mail.sysu.edu.cn	47	82	87	AMER ASSOC ADVANCEMENT SCIENCE	WASHINGTON	SCI ADV	AUG	2020	6	10.1126/sciadv.aba0647	http://dx.doi.org/10.1126/sciadv.aba0647	Multidisciplinary Sciences	Science Citation Index Expanded (SCI-EXPANDED)	32875102	View Full Record in Web of Science
J	Meher, Prabina K.; Sahu, Tanmaya K.; Gahoi, Shachi; Rao, Atmakuri R.	ir-HSP: Improved Recognition of Heat Shock Proteins, Their Families and Sub-types Based On g-Spaced Di-peptide Features and Support Vector Machine	FRONTIERS IN GENETICS	English	Article	molecular chaperones; heat shock; protein folding; machine learning; di-peptide composition; DnaJ proteins	AMINO-ACID-COMPOSITION; SEQUENCE-BASED PREDICTOR; DIPEPTIDE COMPOSITION; MOLECULAR CHAPERONES; N-6-METHYLADENOSINE SITES; HEAT-SHOCK-PROTEIN-70; IDENTIFICATION; CLASSIFICATION; INFLAMMATION; ATTRIBUTES	Heat shock proteins (HSPs) play a pivotal role in cell growth and variability. Since conventional approaches are expensive and voluminous protein sequence information is available in the post-genomic era, development of an automated and accurate computational tool is highly desirable for prediction of HSPs, their families and sub-types. Thus, we propose a computational approach for reliable predi…	[Meher, Prabina K.] ICAR Indian Agr Stat Res Inst, Div Stat Genet, New Delhi, India; [Sahu, Tanmaya K.; Gahoi, Shachi; Rao, Atmakuri R.] ICAR Indian Agr Stat Res Inst, Ctr Agr Bioinformat, New Delhi, India	Indian Council of Agricultural Research (ICAR); ICAR - Indian Agricultural Statistics Research Institute; Indian Council of Agricultural Research (ICAR); ICAR - Indian Agricultural Statistics Research Institute	Rao, AR (corresponding author), ICAR Indian Agr Stat Res Inst, Ctr Agr Bioinformat, New Delhi, India.	rao.cshl.work@gmail.com	96	20	21	FRONTIERS MEDIA SA	LAUSANNE	FRONT GENET	JAN 11	2018	8	10.3389/fgene.2017.00235	http://dx.doi.org/10.3389/fgene.2017.00235	Genetics & Heredity	Science Citation Index Expanded (SCI-EXPANDED)	29379521	View Full Record in Web of Science
J	Zhang, Yundi; Zhang, Ke; Gong, Haoming; Li, Qin; Man, Lajie; Jin, Qingchang; Zhang, Lin; Li, Song	Links Between N6-Methyladenosine and Tumor Microenvironments in Colorectal Cancer	FRONTIERS IN CELL AND DEVELOPMENTAL BIOLOGY	English	Article	colorectal cancer; immunotherapy; N-6-methyladenosine; tumor microenvironments; molecular classification	MOLECULAR SUBTYPES; IMMUNE; CLASSIFICATION; M(6)A; DEMETHYLATION; METHYLATION; EXPRESSION; ANTIBODY	N-6-methyladenosine (m(6)A) is a critical epigenetic modification for tumor malignancies, but its role in regulating the tumor microenvironments (TMEs) has not been fully studied. By integrating multiple data sets and multi-omics data, we comprehensively evaluated the m(6)A writers, erasers, and readers in colorectal cancer and their association with TME characteristics. The m(6)A regulator genes…	[Zhang, Yundi] Chinese Acad Med Sci & Peking Union Med Coll, Canc Hosp, Natl Canc Ctr, Beijing, Peoples R China; [Zhang, Ke] Shandong Univ, Qilu Hosp, Cheeloo Coll Med, Dept Gen Practice, Jinan, Peoples R China; [Gong, Haoming; Man, Lajie; Jin, Qingchang] Shandong Univ, Sch Basic Med Sci, Dept Physiol, Cheeloo Coll Med, Jinan, Peoples R China; [Li, Qin] Shandong Univ, Qilu Hosp, Cheeloo Coll Med,…	Chinese Academy of Medical Sciences - Peking Union Medical College; Cancer Institute & Hospital - CAMS; Peking Union Medical College; Shandong University; Shandong University; Shandong University; Shandong University; Shandong University	Zhang, L (corresponding author), Shandong Univ, Cheeloo Coll Med, Qilu Hosp, Dept Radiat Oncol, Jinan, Peoples R China.;Li, S (corresponding author), Shandong Univ, Cheeloo Coll Med, Qilu Hosp, Dept Med Oncol, Jinan, Peoples R China.	linzhangsdu@163.com; songli@sdu.edu.cn	41	4	4	FRONTIERS MEDIA SA	LAUSANNE	FRONT CELL DEV BIOL	FEB 10	2022	10	10.3389/fcell.2022.807129	http://dx.doi.org/10.3389/fcell.2022.807129	Cell Biology; Developmental Biology	Science Citation Index Expanded (SCI-EXPANDED)	35223837	View Full Record in Web of Science
J	Hu, Yibo; Lei, Li; Jiang, Ling; Zeng, Hongliang; Zhang, Yushan; Fu, Chuhan; Guo, Haoran; Dong, Yumeng; Ouyang, Yujie; Zhang, Xiaolin; Huang, Jinhua; Zeng, Qinghai; Chen, Jing	LncRNA UCA1 promotes keratinocyte-driven inflammation via suppressing METTL14 and activating the HIF-1α/NF-κB axis in psoriasis	CELL DEATH & DISEASE	English	Article		LONG NONCODING RNA; GENE-EXPRESSION; SKIN; CANCER	Keratinocytes are closely associated with innate immunity and inflammatory responses, and are dysregulated during the development of psoriasis, but the underlying mechanisms are not yet fully understood. This work aims to reveal the effects of long non-coding RNA (lncRNA) UCA1 in psoriatic keratinocytes. UCA1 was identified as a psoriasis-related lncRNA that highly expressed in psoriatic lesions.…	[Hu, Yibo; Lei, Li; Jiang, Ling; Zhang, Yushan; Fu, Chuhan; Guo, Haoran; Dong, Yumeng; Ouyang, Yujie; Zhang, Xiaolin; Huang, Jinhua; Zeng, Qinghai; Chen, Jing] Cent South Univ, Xiangya Hosp 3, Dept Dermatol, 138 Tongzipo Rd, Changsha 410013, Hunan, Peoples R China; [Zeng, Hongliang] Hunan Acad Chinese Med, Ctr Med Lab Anim, 128 Yuehua Rd, Changsha 410013, Hunan, Peoples R China	Central South University; Hunan University of Chinese Medicine	Zeng, QH; Chen, J (corresponding author), Cent South Univ, Xiangya Hosp 3, Dept Dermatol, 138 Tongzipo Rd, Changsha 410013, Hunan, Peoples R China.	zengqinghai@csu.edu.cn; 43700351@qq.com	52	12	12	SPRINGERNATURE	LONDON	CELL DEATH DIS	APR 20	2023	14	10.1038/s41419-023-05790-4	http://dx.doi.org/10.1038/s41419-023-05790-4	Cell Biology	Science Citation Index Expanded (SCI-EXPANDED)	37076497	View Full Record in Web of Science
J	Sun, Weifu; Liu, Jia; Zhang, Xu; Zhang, Xiaochen; Gao, Jie; Chen, Xin; Wang, Xian; Qin, Wen; Jin, Zuolin	Long Noncoding RNA and mRNA m6A Modification Analyses of Periodontal Ligament Stem Cells from the Periodontitis Microenvironment Exposed to Static Mechanical Strain	STEM CELLS INTERNATIONAL	English	Article		ORTHODONTIC TOOTH MOVEMENT; BONE	Periodontal ligament stem cells (PDLSCs) play important roles in orthodontic tooth movement (OTM) and can respond to mechanical stress. Our previous study demonstrated that periodontal ligament stem cells derived from periodontitis tissue (pPDLSCs) are more sensitive to static mechanical strain (SMS) than those derived from healthy tissue (hPDLSCs) and reported the long noncoding RNA (lncRNA) exp…	[Sun, Weifu; Liu, Jia; Zhang, Xu; Zhang, Xiaochen; Gao, Jie; Chen, Xin; Wang, Xian; Qin, Wen; Jin, Zuolin] Fourth Mil Med Univ, State Key Lab Mil Stomatol, Xian 710032, Shaanxi, Peoples R China; [Sun, Weifu; Liu, Jia; Zhang, Xu; Zhang, Xiaochen; Gao, Jie; Chen, Xin; Wang, Xian; Qin, Wen; Jin, Zuolin] Fourth Mil Med Univ, Natl Clin Res Ctr Oral Dis, Xian 710032, Shaanxi, Peoples R China; [Sun, Wei…	Air Force Military Medical University; Air Force Military Medical University; Air Force Military Medical University	Qin, W; Jin, ZL (corresponding author), Fourth Mil Med Univ, State Key Lab Mil Stomatol, Xian 710032, Shaanxi, Peoples R China.;Qin, W; Jin, ZL (corresponding author), Fourth Mil Med Univ, Natl Clin Res Ctr Oral Dis, Xian 710032, Shaanxi, Peoples R China.;Qin, W; Jin, ZL (corresponding author), Fourth Mil Med Univ, Shanxi Clin Res Ctr Oral Dis, Sch Stomatol, Dept Orthodont, Xian 710032, Shaanxi, …	weifsun@126.com; woxiao1987@163.com; zhangxufmmu@vip.qq.com; 1625397187@qq.com; smile610627@126.com; 980127484@qq.com; 939497221@qq.com; qinwen0916@126.com; zuolinj@163.com	39	6	7	HINDAWI LTD	LONDON	STEM CELLS INT	NOV 29	2022	2022	10.1155/2022/6243004	http://dx.doi.org/10.1155/2022/6243004	Cell & Tissue Engineering	Science Citation Index Expanded (SCI-EXPANDED)	36483682	View Full Record in Web of Science
J	Zhou, Hongxiu; Xu, Zongren; Liao, Xingyun; Tang, Shiyun; Li, Na; Hou, Shengping	Low Expression of YTH Domain-Containing 1 Promotes Microglial M1 Polarization by Reducing the Stability of Sirtuin 1 mRNA	FRONTIERS IN CELLULAR NEUROSCIENCE	English	Article	m6A; YTHDC1; microglia cells; SIRT1; RNA stability		The N6-methyladenosine (m6A) modification is the most abundant posttranscriptional mRNA modification in mammalian cells and is dynamically modulated by a series of writers, erasers, and readers. Studies have shown that m6A affects RNA metabolism in terms of RNA processing, nuclear export, translation, and decay. However, the role of the m6A modification in retinal microglial activation remains un…	[Zhou, Hongxiu; Xu, Zongren; Liao, Xingyun; Tang, Shiyun; Hou, Shengping] Chongqing Med Univ, Affiliated Hosp 1, Chongqing, Peoples R China; [Zhou, Hongxiu; Xu, Zongren; Liao, Xingyun; Tang, Shiyun; Hou, Shengping] Chongqing Eye Inst, Chongqing, Peoples R China; [Zhou, Hongxiu; Xu, Zongren; Liao, Xingyun; Tang, Shiyun; Hou, Shengping] Chongqing Key Lab Ophthalmol, Chongqing, Peoples R China; [Zho…	Chongqing Medical University; Chongqing Medical University	Hou, SP (corresponding author), Chongqing Med Univ, Affiliated Hosp 1, Chongqing, Peoples R China.;Hou, SP (corresponding author), Chongqing Eye Inst, Chongqing, Peoples R China.;Hou, SP (corresponding author), Chongqing Key Lab Ophthalmol, Chongqing, Peoples R China.;Hou, SP (corresponding author), Natl Clin Res Ctr Ocular Dis, Chongqing Branch, Chongqing, Peoples R China.;Li, N (corresponding a…	102600@cqmu.edu.cn; sphou828@163.com	64	21	24	FRONTIERS MEDIA SA	LAUSANNE	FRONT CELL NEUROSCI	DEC 15	2021	15	10.3389/fncel.2021.774305	http://dx.doi.org/10.3389/fncel.2021.774305	Neurosciences	Science Citation Index Expanded (SCI-EXPANDED)	34975410	View Full Record in Web of Science
J	Yu, Ying; Pan, Yumiao; Fan, Ziyi; Xu, Silun; Gao, Zhiyuan; Ren, Zijing; Yu, Jie; Li, Wen; Liu, Fangtong; Gu, Jintao; Yuan, Ye; Du, Zhimin	LuHui Derivative, A Novel Compound That Inhibits the Fat Mass and Obesity-Associated (FTO), Alleviates the Inflammatory Response and Injury in Hyperlipidemia-Induced Cardiomyopathy	FRONTIERS IN CELL AND DEVELOPMENTAL BIOLOGY	English	Article	hyperlipidemia; inflammation; LuHui derivative; FTO; CD36; m(6)A	MESSENGER-RNA; MEDIATED INFLAMMATION; CD36; TARGET; RECEPTOR; M(6)A; PROLIFERATION; DEMETHYLATION; ADIPOGENESIS; ACCUMULATION	Hyperlipidemia is a major risk factor for metabolic disorders and cardiovascular injury. The excessive deposition of saturated fatty acids in the heart leads to chronic cardiac inflammation, which in turn causes myocardial damage and systolic dysfunction. However, the effective suppression of cardiac inflammation has emerged as a new strategy to reduce the impact of hyperlipidemia on cardiovascul…	[Yu, Ying; Pan, Yumiao; Fan, Ziyi; Xu, Silun; Gao, Zhiyuan; Ren, Zijing; Yu, Jie; Li, Wen; Liu, Fangtong; Gu, Jintao; Yuan, Ye; Du, Zhimin] Harbin Med Univ, Univ Key Lab Drug Res, Affiliated Hosp 2, Inst Clin Pharmacol, Harbin, Heilongjiang, Peoples R China; [Yuan, Ye; Du, Zhimin] Harbin Med Univ, Dept Clin Pharmacol, Coll Pharm, Harbin, Peoples R China; [Du, Zhimin] Macau Univ Sci & Technol, Sta…	Harbin Medical University; Harbin Medical University; Macau University of Science & Technology	Yuan, Y; Du, ZM (corresponding author), Harbin Med Univ, Univ Key Lab Drug Res, Affiliated Hosp 2, Inst Clin Pharmacol, Harbin, Heilongjiang, Peoples R China.;Yuan, Y; Du, ZM (corresponding author), Harbin Med Univ, Dept Clin Pharmacol, Coll Pharm, Harbin, Peoples R China.;Du, ZM (corresponding author), Macau Univ Sci & Technol, State Key Lab Qual Res Chinese Med, Macau, Peoples R China.	yuanye_hmu@126.com; dzm1956@126.com	65	18	19	FRONTIERS MEDIA SA	LAUSANNE	FRONT CELL DEV BIOL	NOV 22	2021	9	10.3389/fcell.2021.731365	http://dx.doi.org/10.3389/fcell.2021.731365	Cell Biology; Developmental Biology	Science Citation Index Expanded (SCI-EXPANDED)	34881240	View Full Record in Web of Science
J	Liu, Yang; Song, Renjie; Zhao, Lu; Lu, Zhike; Li, Yini; Zhan, Xinyi; Lu, Fengjiao; Yang, Jiang; Niu, Yamei; Cao, Xuetao	m6A demethylase ALKBH5 is required for antibacterial innate defense by intrinsic motivation of neutrophil migration	SIGNAL TRANSDUCTION AND TARGETED THERAPY	English	Article		RNA DEMETHYLASE; CECAL LIGATION; HOST-DEFENSE; SEPSIS; RECEPTOR; ACTIVATION; RESISTANCE; RECRUITMENT; LEUKOCYTES; CHEMOTAXIS	Neutrophil migration into the site of infection is necessary for antibacterial innate defense, whereas impaired neutrophil migration may result in excessive inflammation and even sepsis. The neutrophil migration directed by extracellular signals such as chemokines has been extensively studied, yet the intrinsic mechanism for determining neutrophil ability to migrate needs further investigation. N…	[Liu, Yang; Song, Renjie; Zhao, Lu; Zhan, Xinyi; Lu, Fengjiao; Yang, Jiang; Cao, Xuetao] Chinese Acad Med Sci, Inst Basic Med Sci, Dept Immunol, Peking Union Med Coll, Beijing 100005, Peoples R China; [Liu, Yang; Cao, Xuetao] Nankai Univ, Inst Immunol, Coll Life Sci, Frontier Res Ctr Cell Response, Tianjin 300071, Peoples R China; [Lu, Zhike; Li, Yini] Westlake Univ, Sch Life Sci, Hangzhou 310024…	Chinese Academy of Medical Sciences - Peking Union Medical College; Peking Union Medical College; Nankai University; Westlake University; Chinese Academy of Medical Sciences - Peking Union Medical College; Peking Union Medical College; Institute of Basic Medical Sciences - CAMS	Liu, Y; Cao, XT (corresponding author), Chinese Acad Med Sci, Inst Basic Med Sci, Dept Immunol, Peking Union Med Coll, Beijing 100005, Peoples R China.;Liu, Y; Cao, XT (corresponding author), Nankai Univ, Inst Immunol, Coll Life Sci, Frontier Res Ctr Cell Response, Tianjin 300071, Peoples R China.	yliu@immunol.org; caoxt@immunol.org	57	38	39	SPRINGERNATURE	LONDON	SIGNAL TRANSDUCT TAR	JUN 29	2022	7	10.1038/s41392-022-01020-z	http://dx.doi.org/10.1038/s41392-022-01020-z	Biochemistry & Molecular Biology; Cell Biology	Science Citation Index Expanded (SCI-EXPANDED)	35764614	View Full Record in Web of Science
J	Ke, Wei-Liang; Huang, Zhi-Wen; Peng, Chun-Ling; Ke, Yi-Ping	m6A demethylase FTO regulates the apoptosis and inflammation of cardiomyocytes via YAP1 in ischemia-reperfusion injury	BIOENGINEERED	English	Article	Acute myocardial infarction; FTO; N-6-methyladenosine; cardiomyocyte		Reperfusion therapy after acute myocardial infarction can induce myocardial ischemia-reperfusion injury (IRI). Novel evidence has illustrated that N-6-methyladenosine (m(6)A) modification modulates the myocardial IRI progression. Here, our study focuses on the role of m(6)A methyltransferase fat mass and obesity-associated protein (FTO) in myocardial ischemia/reoxygenation injury and explores pot…	[Ke, Wei-Liang; Huang, Zhi-Wen] Guangdong Med Univ, Affiliated Hosp, Dept Cardiol, Zhanjiang, Peoples R China; [Peng, Chun-Ling; Ke, Yi-Ping] Guangdong Med Univ, Affiliated Hosp, Phys Examinat Ctr, Zhanjiang, Peoples R China	Guangdong Medical University; Guangdong Medical University	Huang, ZW (corresponding author), Guangdong Med Univ, Affiliated Hosp, Zhanjiang 524000, Guangdong, Peoples R China.	hang778@yeah.net	19	38	41	TAYLOR & FRANCIS INC	PHILADELPHIA	BIOENGINEERED	MAR 1	2022	13	10.1080/21655979.2022.2030572	http://dx.doi.org/10.1080/21655979.2022.2030572	Biotechnology & Applied Microbiology	Science Citation Index Expanded (SCI-EXPANDED)	35176940	View Full Record in Web of Science
J	Li, Biao; Du, Mingyuan; Sun, Qiao; Cao, Zhengguo; He, Hong	m6A demethylase Fto regulates the TNF-α-induced inflammatory response in cementoblasts	ORAL DISEASES	English	Article	Fto; inflammatory response; MAPK; mRNA stability; NF-kappa B	APICAL PERIODONTITIS; ROOT RESORPTION; MESSENGER-RNA; CEMENTUM; GENE; ASSOCIATION; METHYLATION; DISEASE	Objective: Apical periodontitis is the most frequently occurring pathological lesion. Fat mass and obesity-associated protein (Fto) is the first identified RNA N6-methyladenosine demethylase. However, whether Fto regulates apical periodontitis remains unclear. This study aimed to explore the mechanisms of Fto in the tumor necrosis factor-alpha (TNF-alpha)-induced inflammatory response. Materials …	[Li, Biao; Du, Mingyuan; Sun, Qiao; Cao, Zhengguo; He, Hong] Wuhan Univ, Sch & Hosp Stomatol, State Key Lab Breeding Base Basic Sci Stomatol Hu, Wuhan, Peoples R China; [Li, Biao; Du, Mingyuan; Sun, Qiao; Cao, Zhengguo; He, Hong] Wuhan Univ, Sch & Hosp Stomatol, Key Lab Oral Biomed, Minist Educ, Wuhan, Peoples R China; [Du, Mingyuan; He, Hong] Wuhan Univ, Sch & Hosp Stomatol, Dept Orthodont, Wuha…	Wuhan University; Wuhan University; Wuhan University; Wuhan University	He, H (corresponding author), Wuhan Univ, Dept Orthodont, State Key Lab Breeding Base Basic Sci Stomatol Hu, Luoyu Rd 237, Wuhan 430079, Peoples R China.;He, H (corresponding author), Wuhan Univ, Sch & Hosp Stomatol, Key Lab Oral Biomed, Minist Educ, Luoyu Rd 237, Wuhan 430079, Peoples R China.	drhehong@whu.edu.cn	54	2	3	WILEY	HOBOKEN	ORAL DIS	OCT	2023	29	10.1111/odi.14396	http://dx.doi.org/10.1111/odi.14396	Dentistry, Oral Surgery & Medicine	Science Citation Index Expanded (SCI-EXPANDED)	36227651	View Full Record in Web of Science
J	Mo, Bi-Wen; Li, Xiao-Mang; Li, Shen-Mei; Xiao, Bo; Yang, Jie; Li, Hui-Min	m6A echoes with DNA methylation: Coordinated DNA methylation and gene expression data analysis identified critical m6A genes associated with asthma	GENE	English	Article	Asthma; m6A; DNA methylation; Closed-loop regulation; GEO database	AIRWAY SMOOTH-MUSCLE; RNA METHYLATION; M(6)A	Asthma is a chronic inflammatory disease that involves complex gene-environment interactions. Methylation of nucleotides, such as 5-methylcytosine (5mC) in DNA and N6-methyladenosine (m6A) in mRNA, carries important information for gene regulation. Our study screened m6A genes and genes associated with asthma from the Gene Expression Omnibus (GEO) databases GSE63383, GSE119580, GSE38003, GSE34313…	[Mo, Bi-Wen] Guilin Med Univ, Affiliated Hosp 2, Guilin 541199, Peoples R China; [Mo, Bi-Wen] Guangxi Hlth Commiss, Key Lab Glucose & Lipid Metab Disorders, Guilin, Peoples R China; [Li, Xiao-Mang; Li, Shen-Mei; Yang, Jie; Li, Hui-Min] Guilin Med Univ, Guilin 541000, Peoples R China; [Xiao, Bo] Guilin Med Univ, Affiliated Hosp, Guilin 541000, Peoples R China; [Xiao, Bo] Guilin Med Univ, Key Lab R…	Guilin Medical University; Guilin Medical University; Guilin Medical University; Guilin Medical University	Li, HM (corresponding author), Guilin Med Univ, Guilin 541000, Peoples R China.	497740728@qq.com	39	8	8	ELSEVIER	AMSTERDAM	GENE	JUN 20	2022	828	10.1016/j.gene.2022.146457	http://dx.doi.org/10.1016/j.gene.2022.146457	Genetics & Heredity	Science Citation Index Expanded (SCI-EXPANDED)	35421547	View Full Record in Web of Science
J	Li, Longbo; Xu, Nannan; Liu, Jia; Chen, Zhenzhen; Liu, Xu; Wang, Junnan	m6A Methylation in Cardiovascular Diseases: From Mechanisms to Therapeutic Potential	FRONTIERS IN GENETICS	English	Review	epigenetics; cardiovascular pathophysiology; cardiovascular diseases; m6A demethylase; m6A methyltransferase; m6A	MESSENGER-RNA METHYLATION; M(6)A METHYLTRANSFERASE; CELL PROLIFERATION; N-6-METHYLADENOSINE; TRANSLATION; PROTEIN; FTO; REVEALS; IDENTIFICATION; ALKBH5	Cardiovascular disease (CVD) is a leading cause of morbidity and mortality worldwide. Recent studies have shown that n6-methyladenosine (m6A) plays a major role in cardiovascular homeostasis and pathophysiology. These studies have confirmed that m6A methylation affects the pathophysiology of cardiovascular diseases by regulating cellular processes such as differentiation, proliferation, inflammat…	[Li, Longbo; Xu, Nannan; Liu, Jia; Chen, Zhenzhen; Liu, Xu; Wang, Junnan] Second Hosp Jilin Univ, Dept Cardiol, Changchun, Peoples R China	Jilin University	Wang, JN (corresponding author), Second Hosp Jilin Univ, Dept Cardiol, Changchun, Peoples R China.	jdeywjn@163.com	137	26	28	FRONTIERS MEDIA SA	LAUSANNE	FRONT GENET	JUN 28	2022	13	10.3389/fgene.2022.908976	http://dx.doi.org/10.3389/fgene.2022.908976	Genetics & Heredity	Science Citation Index Expanded (SCI-EXPANDED)	35836571	View Full Record in Web of Science
J	Chen, Li; Xia, Siwei; Wang, Feixia; Zhou, Yuanyuan; Wang, Shuqi; Yang, Ting; Li, Yang; Xu, Min; Zhou, Ya; Kong, Desong; Zhang, Zili; Shao, Jiangjuan; Xu, Xuefen; Zhang, Feng; Zheng, Shizhong	m6A methylation-induced NR1D1 ablation disrupts the HSC circadian clock and promotes hepatic fibrosis	PHARMACOLOGICAL RESEARCH	English	Article	Liver fibrosis; Circadian clock; Primary hepatic stellate cell; M(6)A; Mitochondrial dynamics	STELLATE CELL ACTIVATION; REV-ERB-ALPHA; FISSION; GENE	The roles of nuclear receptor subfamily 1 group d member 1 (NR1D1) and the circadian clock in liver fibrosis remain unclear. Here, we showed that liver clock genes, especially NR1D1, were dysregulated in mice with carbon tetrachloride (CCl4)-induced liver fibrosis. In turn, disruption of the circadian clock exacerbated exper-imental liver fibrosis. NR1D1-deficient mice were more sensitive to CCl4…	[Chen, Li; Xia, Siwei; Wang, Feixia; Zhou, Yuanyuan; Wang, Shuqi; Yang, Ting; Li, Yang; Xu, Min; Zhou, Ya; Zhang, Zili; Shao, Jiangjuan; Xu, Xuefen; Zhang, Feng; Zheng, Shizhong] Nanjing Univ Chinese Med, Sch Pharm, Jiangsu Key Lab Pharmacol & Safety Evaluat Chinese, 138 Xianlin Ave, Nanjing 210023, Peoples R China; [Kong, Desong] Nanjing Univ Chinese Med, Nanjing Hosp Chinese Med, 157 Daming Rd,…	Nanjing University of Chinese Medicine; Nanjing University of Chinese Medicine	Zhang, F; Zheng, SZ (corresponding author), Nanjing Univ Chinese Med, Sch Pharm, Jiangsu Key Lab Pharmacol & Safety Evaluat Chinese, 138 Xianlin Ave, Nanjing 210023, Peoples R China.	zhangfeng2013@njucm.edu.cn; nytws@njucm.edu.cn	51	10	10	ACADEMIC PRESS LTD- ELSEVIER SCIENCE LTD	LONDON	PHARMACOL RES	MAR	2023	189	10.1016/j.phrs.2023.106704	http://dx.doi.org/10.1016/j.phrs.2023.106704	Pharmacology & Pharmacy	Science Citation Index Expanded (SCI-EXPANDED)	36813093	View Full Record in Web of Science
J	Li, Qian; Yang, Li; Zhang, Feng; Liu, Jiaxi; Jiang, Min; Chen, Yannan; Ren, Chenchen	m6A methyltransferase METTL3 inhibits endometriosis by regulating alternative splicing of MIR17HG	REPRODUCTION	English	Article		PROSTAGLANDIN E-2; METABOLISM; EXPRESSION; ESTRADIOL; CELLS; WOMEN	In brief: Inflammation and abnormal immune response are the key processes in the development of endometriosis (EMs), and m6A modification can regulate the inflammatory response. This study reveals that METTL3-mediated N6-methyladenosine (m6A) modification plays an important role in EMs.m6A modification is largely involved in the development of different diseases. This study intended to investigat…	[Chen, Yannan; Ren, Chenchen] Zhengzhou Univ, Affiliated Hosp 3, Dept Gynecol, Zhengzhou, Peoples R China; Henan Prov Women & Childrens Hosp, Zhengzhou, Peoples R China	Zhengzhou University	Chen, YN; Ren, CC (corresponding author), Zhengzhou Univ, Affiliated Hosp 3, Dept Gynecol, Zhengzhou, Peoples R China.	chenyannan@zzu.edu.cn; renchenchen1106@126.com	46	3	3	BIOSCIENTIFICA LTD	BRISTOL	REPRODUCTION	FEB 1	2023	165	10.1530/REP-22-0102	http://dx.doi.org/10.1530/REP-22-0102	Developmental Biology; Reproductive Biology	Science Citation Index Expanded (SCI-EXPANDED)	36445237	View Full Record in Web of Science
J	Wang, Hui; Fu, Liujing; Li, Yin; Wei, Liudong; Gu, Xiufeng; Li, Huanming; Li, Jie; Wen, Shangyu	m6A methyltransferase WTAP regulates myocardial ischemia reperfusion injury through YTHDF1/FOXO3a signaling	APOPTOSIS	English	Article	Myocardial ischemia reperfusion injury; N-6-methyladenosine; WTAP; FOXO3a	N6-METHYLADENOSINE MODIFICATION; M(6)A MODIFICATION; RNA; EXERCISE	N-6-methyladenosine (m(6)A) is emerging as an essential regulator in the progression of myocardial ischemia reperfusion (I/R) injury. However, the in-depth functions and mechanisms for m(6)A are still unclear. This work aimed to explore the potential functions and mechanisms for myocardial I/R injury. In this study, m(6)A methyltransferase WTAP and m(6)A modification level elevated in the hypoxia…	[Wang, Hui; Fu, Liujing; Li, Yin; Wei, Liudong; Gu, Xiufeng; Li, Huanming; Li, Jie; Wen, Shangyu] Tianjin Fourth Cent Hosp, Dept Cardiol, Tianjin 300140, Peoples R China		Wen, SY (corresponding author), Tianjin Fourth Cent Hosp, Dept Cardiol, Tianjin 300140, Peoples R China.	shangyu_wen@yeah.net	35	9	10	SPRINGER	DORDRECHT	APOPTOSIS	JUN	2023	28	10.1007/s10495-023-01818-4	http://dx.doi.org/10.1007/s10495-023-01818-4	Biochemistry & Molecular Biology; Cell Biology	Science Citation Index Expanded (SCI-EXPANDED)	36894806	View Full Record in Web of Science
J	Zhang, Jiamin; Song, Bimei; Zeng, Yue; Xu, Chao; Gao, Liang; Guo, Yan; Liu, Jingbo	m6A modification in inflammatory bowel disease provides new insights into clinical applications	BIOMEDICINE & PHARMACOTHERAPY	English	Review	M6A modification; Inflammatory bowel disease; Intestinal immunity; Intestinal barrier; IBD therapy	INTESTINAL EPITHELIAL BARRIER; M(6)A RNA METHYLATION; STEM-LIKE CELLS; MESSENGER-RNA; ULCERATIVE-COLITIS; NONCODING RNA; N-6-METHYLADENOSINE MODIFICATION; DENDRITIC CELLS; GUT MICROBIOTA; PROTEIN	Inflammatory bowel disease (IBD) results from a complex interplay between genetic predisposition, environ-mental factors, and gut microbes. The role of N6-methyladenosine (m6A) methylation in the pathogenesis of IBD has attracted increasing attention. m6A modification not only regulates intestinal mucosal immunity and in-testinal barrier function, but also affects apoptosis and autophagy in intes…	[Zhang, Jiamin; Song, Bimei; Zeng, Yue; Xu, Chao; Gao, Liang; Liu, Jingbo] China Med Univ, Sch Stomatol, Dept Periodont, 117 Nanjing North St, Shenyang 110002, Peoples R China; [Guo, Yan] China Med Univ, Sch & Hosp Stomatol, Dept Cent Lab, Liaoning Prov Key Lab Oral Dis, Shenyang 110002, Peoples R China; [Guo, Yan] China Med Univ, Sch & Hosp Stomatol, Liaoning Prov Key Lab Oral Dis, Dept Oral Bio…	China Medical University; China Medical University; China Medical University	Liu, JB (corresponding author), China Med Univ, Sch Stomatol, Dept Periodont, 117 Nanjing North St, Shenyang 110002, Peoples R China.	jingboliu_cmu@163.com	156	10	11	ELSEVIER FRANCE-EDITIONS SCIENTIFIQUES MEDICALES ELSEVIER	ISSY-LES-MOULINEAUX	BIOMED PHARMACOTHER	MAR	2023	159	10.1016/j.biopha.2023.114298	http://dx.doi.org/10.1016/j.biopha.2023.114298	Medicine, Research & Experimental; Pharmacology & Pharmacy	Science Citation Index Expanded (SCI-EXPANDED)	36706633	View Full Record in Web of Science
J	Guo, Feng; Zhang, Yanhong; Ma, Jinyou; Yu, Yan; Wang, Qiuxia; Gao, Pei; Wang, Li; Xu, Zhiyong; Wei, Xiaobing; Jing, Mengna	m6A mRNA Methylation Was Associated With Gene Expression and Lipid Metabolism in Liver of Broilers Under Lipopolysaccharide Stimulation	FRONTIERS IN GENETICS	English	Article	m(6)A-sequencing; chicken; liver; inflammation; lipid metabolism		Hepatic inflammation is always accompanied with abnormal lipid metabolism. Whether N-6-methyladenosine (m(6)A) mRNA methylation affects irregular inflammatory lipid level is unclear. Here, the m(6)A modification patterns in chicken liver at the acute stage of LPS-stimulated inflammation and at the normal state were explored via m(6)A and RNA sequencing and bioinformatics analysis. A total of 7,81…	[Guo, Feng; Zhang, Yanhong; Ma, Jinyou; Yu, Yan; Wang, Qiuxia; Gao, Pei; Wang, Li; Xu, Zhiyong; Wei, Xiaobing; Jing, Mengna] Henan Inst Sci & Technol, Coll Anim Sci & Vet Med, Xinxiang, Henan, Peoples R China; [Guo, Feng] Henan Inst Sci & Technol, Postdoctoral Res & Dev Base, Xinxiang, Henan, Peoples R China	Henan Institute of Science & Technology; Henan Institute of Science & Technology	Zhang, YH; Ma, JY (corresponding author), Henan Inst Sci & Technol, Coll Anim Sci & Vet Med, Xinxiang, Henan, Peoples R China.	yuhui0906@126.com; marjy@163.com	29	6	6	FRONTIERS MEDIA SA	LAUSANNE	FRONT GENET	FEB 25	2022	13	10.3389/fgene.2022.818357	http://dx.doi.org/10.3389/fgene.2022.818357	Genetics & Heredity	Science Citation Index Expanded (SCI-EXPANDED)	35281825	View Full Record in Web of Science
J	Qin, Yanqin; Li, Binghua; Arumugam, Suyavaran; Lu, Qiuxia; Mankash, Salah M.; Li, Junzi; Sun, Beicheng; Li, Jiansheng; Flavell, Richard A.; Li, Hua-Bing; Ouyang, Xinshou	m6A mRNA methylation-directed myeloid cell activation controls progression of NAFLD and obesity	CELL REPORTS	English	Article		FATTY LIVER-DISEASE; GENE-EXPRESSION; IMMUNE-SYSTEM; NUCLEAR-RNA; METABOLISM; STEATOHEPATITIS; INFLAMMATION; TRANSCRIPTS; MACROPHAGES; STRESS	N-6-methyladenosine (m(6)A) RNA modification is a fundamental determinant of mRNA metabolism, but its role in innate immunity-driven non-alcoholic fatty liver disease (NAFLD) and obesity is not known. Here, we show that myeloid lineage-restricted deletion of the m(6)A writerprotein Methyltransferase Like 3 (METTL3) prevents age-related and diet-induced development of NAFLD and obesity in mice wit…	[Qin, Yanqin; Li, Binghua; Arumugam, Suyavaran; Lu, Qiuxia; Mankash, Salah M.; Li, Junzi; Ouyang, Xinshou] Yale Univ, Dept Internal Med, Sect Digest Dis, Sch Med, New Haven, CT 06520 USA; [Li, Hua-Bing] Shanghai Jiao Tong Univ, Shanghai Inst Immunol, State Key Lab Oncogenes & Related Genes, Sch Med, Shanghai 200025, Peoples R China; [Li, Hua-Bing] Shanghai Jiao Tong Univ, Yale Inst Immune Metab, …	Yale University; Shanghai Jiao Tong University; Chinese Academy of Sciences; Shanghai Jiao Tong University; Yale University; Yale University; Howard Hughes Medical Institute; Henan University of Traditional Chinese Medicine; Nanjing University	Ouyang, XS (corresponding author), Yale Univ, Dept Internal Med, Sect Digest Dis, Sch Med, New Haven, CT 06520 USA.;Li, HB (corresponding author), Shanghai Jiao Tong Univ, Shanghai Inst Immunol, State Key Lab Oncogenes & Related Genes, Sch Med, Shanghai 200025, Peoples R China.;Li, HB (corresponding author), Shanghai Jiao Tong Univ, Yale Inst Immune Metab, Sch Med, Shanghai 200025, Peoples R Chin…	richard.flavell@yale.edu; huabing.li@shsmu.edu.cn; xinshou.ouyang@yale.edu	48	58	64	CELL PRESS	CAMBRIDGE	CELL REP	NOV 9	2021	37	10.1016/j.celrep.2021.109968	http://dx.doi.org/10.1016/j.celrep.2021.109968	Cell Biology	Science Citation Index Expanded (SCI-EXPANDED)	34758326	View Full Record in Web of Science
J	Zhang, Ting; Ding, Chenbo; Chen, Huifang; Zhao, Jun; Chen, Zhejun; Chen, Baiwen; Mao, Kaiqiong; Hao, Yajuan; Roulis, Manolis; Xu, Hao; Kluger, Yuval; Zou, Qiang; Ye, Youqiong; Zhan, Meixiao; Flavell, Richard A.; Li, Hua-Bing	m6A mRNA modification maintains colonic epithelial cell homeostasis via NF-κB-mediated antiapoptotic pathway	SCIENCE ADVANCES	English	Article		LGR5(+) STEM-CELLS; IKK-BETA; NUCLEAR-RNA; N-6-METHYLADENOSINE; CRYPT; DIFFERENTIATION; IDENTIFICATION; INFLAMMATION; INHIBITION; ACTIVATION	Colonic mucosal barrier dysfunction is one of the major causes of inflammatory bowel disease (IBD). However, the mechanisms underlying mucosal barrier dysfunction are poorly understood. N-6-methyladenosine (m(6)A) mRNA modification is an important modulator of epitranscriptional regulation of gene expression, participating in multiple physiological and pathological processes. However, the functio…	[Zhang, Ting; Ding, Chenbo; Chen, Huifang; Chen, Zhejun; Chen, Baiwen; Mao, Kaiqiong; Hao, Yajuan; Zou, Qiang; Ye, Youqiong; Li, Hua-Bing] Shanghai Jiao Tong Univ, Shanghai Inst Immunol, State Key Lab Oncogenes & Related Genes, Sch Med, Shanghai 200025, Peoples R China; [Zhang, Ting; Ding, Chenbo; Chen, Huifang; Mao, Kaiqiong; Hao, Yajuan; Li, Hua-Bing] Shanghai Jiao Tong Univ, Yale Inst Immune M…	Chinese Academy of Sciences; Shanghai Jiao Tong University; Shanghai Jiao Tong University; Shanghai Jiao Tong University; Yale University; Yale University; Jinan University; Yale University; Howard Hughes Medical Institute	Ding, CB; Li, HB (corresponding author), Shanghai Jiao Tong Univ, Shanghai Inst Immunol, State Key Lab Oncogenes & Related Genes, Sch Med, Shanghai 200025, Peoples R China.;Ding, CB; Li, HB (corresponding author), Shanghai Jiao Tong Univ, Yale Inst Immune Metab, Sch Med, Shanghai 200025, Peoples R China.;Flavell, RA; Li, HB (corresponding author), Yale Univ, Dept Immunobiol, Sch Med, New Haven, C…	chenbo.ding@sjtu.edu.cn; zhanmeixiao1987@126.com; richard.flavell@yale.edu; huabing.li@shsmu.edu.cn	53	36	38	AMER ASSOC ADVANCEMENT SCIENCE	WASHINGTON	SCI ADV	MAR	2022	8	10.1126/sciadv.abl5723	http://dx.doi.org/10.1126/sciadv.abl5723	Multidisciplinary Sciences	Science Citation Index Expanded (SCI-EXPANDED)	35333576	View Full Record in Web of Science
J	Ding, Lu; Wu, Huiran; Wang, Yi; Li, Yun; Liang, Zhanping; Xia, Xiaohuan; Zheng, Jialin C.	m6A Reader Igf2bp1 Regulates the Inflammatory Responses of Microglia by Stabilizing Gbp11 and Cp mRNAs	FRONTIERS IN IMMUNOLOGY	English	Article	Igf2bp1; Gbp11; Cp; m6A reader; microglial activation; neuroinflammation	EXPRESSION; CELLS; ACTIVATION	Microglia are brain resident cells that function as brain phagocytic macrophages. The inflammatory responses of microglia induced by pathologic insults are key regulators in the progression of various neurological disorders. Currently, little is known about how these responses are regulated intrinsically. Here, it is observed that LPS-activated microglia exhibit distinct N6-methyladenosine (m6A) …	[Ding, Lu; Wu, Huiran; Li, Yun; Liang, Zhanping; Xia, Xiaohuan] Tongji Univ, Ctr Translat Neurodegenerat & Regenerat Therapy, Sch Med, Tongji Hosp, Shanghai, Peoples R China; [Wang, Yi] Tongji Univ, Translat Res Ctr, Sch Med, Shanghai Yangzhi Rehabil Hosp, Shanghai, Peoples R China; [Xia, Xiaohuan; Zheng, Jialin C.] Tongji Univ, Translat Res Inst Brain & Brain Intelligence, Sch Med, Shanghai Peop…	Tongji University; Tongji University; Tongji University; Tongji University; Tongji University	Xia, XH (corresponding author), Tongji Univ, Ctr Translat Neurodegenerat & Regenerat Therapy, Sch Med, Tongji Hosp, Shanghai, Peoples R China.;Xia, XH; Zheng, JLC (corresponding author), Tongji Univ, Translat Res Inst Brain & Brain Intelligence, Sch Med, Shanghai Peoples Hosp 4, Shanghai, Peoples R China.;Xia, XH; Zheng, JLC (corresponding author), Tongji Univ, Shanghai Frontiers Sci Ctr Nanocata…	xiaohuan_xia@163.com; JialinZheng@tongil.edu.cn	28	17	19	FRONTIERS MEDIA SA	LAUSANNE	FRONT IMMUNOL	APR 29	2022	13	10.3389/fimmu.2022.872252	http://dx.doi.org/10.3389/fimmu.2022.872252	Immunology	Science Citation Index Expanded (SCI-EXPANDED)	35572575	View Full Record in Web of Science
J	Yu, Ruiqing; Li, Qimeng; Feng, Zhihui; Cai, Luhui; Xu, Qiong	m6A Reader YTHDF2 Regulates LPS-Induced Inflammatory Response	INTERNATIONAL JOURNAL OF MOLECULAR SCIENCES	English	Article	YTHDF2; inflammatory reaction; MAPK; NF-kappa B; mRNA stability	CCR4-NOT DEADENYLASE COMPLEX; M(6)A; PROMOTES; REVEALS; MAP4K4; MECHANISM; CANCER; DOMAIN; CELL; STEM	N6-methyladenosine (m6A) is an abundant mRNA modification that affects multiple biological processes, including those involved in the cell stress response and viral infection. YTH domain family 2 (YTHDF2) is an m6A-binding protein that affects the localization and stability of targeted mRNA. RNA-binding proteins (RBPs) can regulate the stability of inflammatory gene mRNA transcripts, thus partici…	[Yu, Ruiqing; Li, Qimeng; Feng, Zhihui; Cai, Luhui; Xu, Qiong] Sun Yat Sen Univ, Guanghua Sch Stomatol, Guangzhou 510055, Guangdong, Peoples R China; [Yu, Ruiqing; Li, Qimeng; Feng, Zhihui; Cai, Luhui; Xu, Qiong] Sun Yat Sen Univ, Guangdong Prov Key Lab Stomatol, Guangzhou 510055, Guangdong, Peoples R China	Sun Yat Sen University; Sun Yat Sen University	Xu, Q (corresponding author), Sun Yat Sen Univ, Guanghua Sch Stomatol, Guangzhou 510055, Guangdong, Peoples R China.	yruiqing@163.com; liqimeng22@outlook.com; fzhh136@sina.com; lucy0526@126.com; xqiong@mail.sysu.edu.cn	45	156	170	MDPI	BASEL	INT J MOL SCI	MAR 15	2019	20	10.3390/ijms20061323	http://dx.doi.org/10.3390/ijms20061323	Biochemistry & Molecular Biology; Chemistry, Multidisciplinary	Science Citation Index Expanded (SCI-EXPANDED)	30875984	View Full Record in Web of Science
J	Yang, Jingqi; Shangguan, Qing; Xie, Guobo; Yang, Ming; Sheng, Guotai	M6A regulator methylation patterns and characteristics of immunity in acute ST-segment elevation myocardial infarction	SCIENTIFIC REPORTS	English	Article		N6-METHYLADENOSINE; INFLAMMATION; LANDSCAPE; ROLES	M6A methylation is the most prevalent and abundant RNA modification in mammals. Although there are many studies on the regulatory role of m6A methylation in the immune response, the m6A regulators in the pathogenesis of acute ST-segment elevation myocardial infarction (STEMI) remain unclear. We comprehensively analysed the role of m6A regulators in STEMI and built a predictive model, revealing th…	[Yang, Jingqi; Shangguan, Qing; Xie, Guobo; Yang, Ming; Sheng, Guotai] Jiangxi Prov Peoples Hosp, Nanchang Med Coll, Dept Cardiovasc Med, Affiliated Hosp 1, 152 Aiguo Rd, Nanchang, Peoples R China		Yang, M (corresponding author), Jiangxi Prov Peoples Hosp, Nanchang Med Coll, Dept Cardiovasc Med, Affiliated Hosp 1, 152 Aiguo Rd, Nanchang, Peoples R China.	ym2021@189.cn	51	0	0	NATURE PORTFOLIO	BERLIN	SCI REP-UK	SEP 21	2023	13	10.1038/s41598-023-42959-5	http://dx.doi.org/10.1038/s41598-023-42959-5	Multidisciplinary Sciences	Science Citation Index Expanded (SCI-EXPANDED)	37735234	View Full Record in Web of Science
J	Fan, Yongfei; Zhou, Yong; Lou, Ming; Li, Xinwei; Zhu, Xudong; Yuan, Kai	m6A Regulator-Mediated Methylation Modification Patterns and Characterisation of Tumour Microenvironment Infiltration in Non-Small Cell Lung Cancer	JOURNAL OF INFLAMMATION RESEARCH	English	Article	immunophenotype; immunotherapy; m(6)A modification; non-small cell lung cancer; tumour microenvironment	MESSENGER-RNA; N-6-METHYLADENOSINE MODIFICATION; POLYADENYLATION; NEOANTIGENS; LANDSCAPE; IMMUNITY	Purpose: The role of RNA N6-methyladenosine (m(6)A) modification in the progression of multiple tumours and the tumour microenvironment (TME) has been progressively demonstrated and promises a new direction for tumour therapy. However, there have been no reports on systematic analyses of RNA m(6)A modification in TME in non-small cell lung cancer (NSCLC). Patients and Methods: In this study, we u…	[Fan, Yongfei; Zhou, Yong; Lou, Ming; Zhu, Xudong; Yuan, Kai] Nanjing Med Univ, Dept Thorac Surg, Affiliated Changzhou Peoples Hosp 2, 29 Xinglong Lane, Changzhou 213003, Jiangsu, Peoples R China; [Li, Xinwei] Bengbu Med Coll, Dept Gastroenterol, Affiliated Canc Hosp, Bengbu, Peoples R China; [Yuan, Kai] Nanjing Med Univ, Heart & Lung Dis Lab, Affiliated Changzhou Peoples Hosp 2, Changzhou, Peopl…	Nanjing Medical University; Bengbu Medical College; Nanjing Medical University	Yuan, K (corresponding author), Nanjing Med Univ, Dept Thorac Surg, Affiliated Changzhou Peoples Hosp 2, 29 Xinglong Lane, Changzhou 213003, Jiangsu, Peoples R China.	yuankai1978@163.com	72	12	12	DOVE MEDICAL PRESS LTD	ALBANY	J INFLAMM RES		2022	15	10.2147/JIR.S356841	http://dx.doi.org/10.2147/JIR.S356841	Immunology	Science Citation Index Expanded (SCI-EXPANDED)	35356071	View Full Record in Web of Science
J	Hu, Shidong; Shen, Chen; Yao, Xudong; Zou, Yulong; Wang, Ting; Sun, Xianding; Nie, Mao	m6A regulator-mediated methylation modification patterns and immune microenvironment infiltration characterization in osteoarthritis	BMC MEDICAL GENOMICS	English	Article	RNA N6-methyladenosine; Osteoarthritis; Bioinformatic analysis; Subtype classification; Immune infiltration	KNEE OSTEOARTHRITIS; INFLAMMATION; DIAGNOSIS; INJURY	Osteoarthritis (OA) is a common disease in orthopedics. RNA N6-methyladenosine (m6A) exerts an essential effect in a variety of biological processes in the eukaryotes. In this study, we determined the effect of m6A regulators in the OA along with performing the subtype classification. Differential analysis of OA and normal samples in the database of Gene Expression Omnibus identified 9 significan…	[Hu, Shidong; Shen, Chen; Yao, Xudong; Zou, Yulong; Wang, Ting; Sun, Xianding; Nie, Mao] Chongqing Med Univ, Affiliated Hosp 2, Ctr Joint Surg, Dept Orthoped Surg, 76 Linjiang Rd, Chongqing 400016, Peoples R China	Chongqing Medical University	Nie, M (corresponding author), Chongqing Med Univ, Affiliated Hosp 2, Ctr Joint Surg, Dept Orthoped Surg, 76 Linjiang Rd, Chongqing 400016, Peoples R China.	302218@cqmu.edu.cn	29	4	4	BMC	LONDON	BMC MED GENOMICS	DEC 30	2022	15	10.1186/s12920-022-01429-z	http://dx.doi.org/10.1186/s12920-022-01429-z	Genetics & Heredity	Science Citation Index Expanded (SCI-EXPANDED)	36585683	View Full Record in Web of Science
J	Zhang, Bo; Wu, Qiong; Li, Ben; Wang, Defeng; Wang, Lei; Zhou, You Lang	m6A regulator-mediated methylation modification patterns and tumor microenvironment infiltration characterization in gastric cancer	MOLECULAR CANCER	English	Article	m(6)A; Tumor microenvironment; Stroma; Immunotherapy; Mutation burden	RNA METHYLATION; EXPRESSION; CELLS; EXCLUSION; BLOCKADE; IMMUNITY	Background The epigenetic regulation of immune response has been demonstrated in recent studies. Nonetheless, potential roles of RNA N6-methyladenosine (m(6)A) modification in tumor microenvironment (TME) cell infiltration remain unknown. Methods We comprehensively evaluated the m(6)A modification patterns of 1938 gastric cancer samples based on 21 m(6)A regulators, and systematically correlated …	[Zhang, Bo; Wu, Qiong; Wang, Defeng; Zhou, You Lang] Nantong Univ, Res Ctr Clin Med, Affiliated Hosp, Nantong 226001, Jiangsu, Peoples R China; [Zhang, Bo; Wu, Qiong] Nantong Univ, Med Sch, Nantong 226001, Jiangsu, Peoples R China; [Li, Ben] Nantong Univ, Dept Cardiothorac Surg, Affiliated Hosp, Nantong 226001, Jiangsu, Peoples R China; [Wang, Lei] Shanghai Jiao Tong Univ, Sch Life Sci & Biotechn…	Nantong University; Nantong University; Nantong University; Shanghai Jiao Tong University	Zhou, YL (corresponding author), Nantong Univ, Res Ctr Clin Med, Affiliated Hosp, Nantong 226001, Jiangsu, Peoples R China.;Wang, L (corresponding author), Shanghai Jiao Tong Univ, Sch Life Sci & Biotechnol, State Key Lab Microbial Metab, Shanghai 200240, Peoples R China.	wanglei0806@sjtu.edu.cn; zhouyoulang@ntu.edu.cn	50	681	697	BMC	LONDON	MOL CANCER	MAR 12	2020	19	10.1186/s12943-020-01170-0	http://dx.doi.org/10.1186/s12943-020-01170-0	Biochemistry & Molecular Biology; Oncology	Science Citation Index Expanded (SCI-EXPANDED)	32164750	View Full Record in Web of Science
J	Maimaiti, Aierpati; Turhon, Mirzat; Cheng, Xiaojiang; Su, Riqing; Kadeer, Kaheerman; Axier, Aximujiang; Ailaiti, Dilimulati; Aili, Yirizhati; Abudusalamu, Rena; Kuerban, Ajimu; Wang, Zengliang; Aisha, Maimaitili	m6A regulator-mediated RNA methylation modification patterns and immune microenvironment infiltration characterization in patients with intracranial aneurysms	FRONTIERS IN NEUROLOGY	English	Article	intracranial aneurysm; epigenetics; m6A RNA methylation; immune microenvironment; immunity	GENE-EXPRESSION; POLARIZATION; INFLAMMATION; RUPTURE; PATHWAY	BackgroundThe role of epigenetic modulation in immunity is receiving increased recognition-particularly in the context of RNA N6-methyladenosine (m6A) modifications. Nevertheless, it is still uncertain whether m6A methylation plays a role in the onset and progression of intracranial aneurysms (IAs). This study aimed to establish the function of m6A RNA methylation in IA, as well as its correlatio…	[Maimaiti, Aierpati; Cheng, Xiaojiang; Su, Riqing; Kadeer, Kaheerman; Axier, Aximujiang; Ailaiti, Dilimulati; Aili, Yirizhati; Wang, Zengliang; Aisha, Maimaitili] Xinjiang Med Univ, Neurosurg Ctr, Dept Neurosurg, Affiliated Hosp 1, Urumqi, Peoples R China; [Turhon, Mirzat] Capital Med Univ, Beijing Neurosurg Inst, Dept Neurointervent Surg, Beijing, Peoples R China; [Turhon, Mirzat] Capital Med Un…	Xinjiang Medical University; Capital Medical University; Capital Medical University; Xinjiang Medical University	Wang, ZL; Aisha, M (corresponding author), Xinjiang Med Univ, Neurosurg Ctr, Dept Neurosurg, Affiliated Hosp 1, Urumqi, Peoples R China.	wzl3ng@126.com; mmtaili@aliyun.com	59	5	5	FRONTIERS MEDIA SA	LAUSANNE	FRONT NEUROL	AUG 5	2022	13	10.3389/fneur.2022.889141	http://dx.doi.org/10.3389/fneur.2022.889141	Clinical Neurology; Neurosciences	Science Citation Index Expanded (SCI-EXPANDED)	35989938	View Full Record in Web of Science
J	Wang, Ye; Wang, Xinyi; Yang, Chenyi; Hua, Wei; Wang, Haiyun	m6A Regulator-Mediated RNA Methylation Modification Patterns are Involved in the Pathogenesis and Immune Microenvironment of Depression	FRONTIERS IN GENETICS	English	Article	depression; immune microenvironment; N6-methyladenosine; biomarker; epigenetics	TRANSCRIPTOME ANALYSIS; PREFRONTAL CORTEX; SIGNALING PATHWAY; GENE; DISORDER; RATS; N-6-METHYLADENOSINE; HIPPOCAMPUS; INSIGHTS; PACKAGE	Depression is a genetical disease characterized by neuroinflammatory symptoms and is difficult to diagnose and treat effectively. Recently, modification of N6-methyladenosine (m6A) at the gene level was shown to be closely related to immune regulation. This study was conducted to explore the effect of m6A modifications on the occurrence of depression and composition of the immune microenvironment…	[Wang, Ye; Wang, Xinyi; Yang, Chenyi; Hua, Wei; Wang, Haiyun] Tianjin Med Univ, Cent Clin Coll 3, Tianjin, Peoples R China; [Wang, Xinyi; Yang, Chenyi; Hua, Wei; Wang, Haiyun] Tianjin Key Lab Extracorporeal LifeSupport Crit Di, Tianjin, Peoples R China; [Wang, Xinyi; Yang, Chenyi; Hua, Wei; Wang, Haiyun] Artificial Cell Engn Technol Res Ctr, Tianjin, Peoples R China; [Wang, Xinyi; Yang, Chenyi; H…	Tianjin Medical University; Nankai University	Wang, HY (corresponding author), Tianjin Med Univ, Cent Clin Coll 3, Tianjin, Peoples R China.;Wang, HY (corresponding author), Tianjin Key Lab Extracorporeal LifeSupport Crit Di, Tianjin, Peoples R China.;Wang, HY (corresponding author), Artificial Cell Engn Technol Res Ctr, Tianjin, Peoples R China.;Wang, HY (corresponding author), Tianjin Inst Hepatobiliary Dis, Tianjin, Peoples R China.;Wang,…	why819@126.com	61	2	2	FRONTIERS MEDIA SA	LAUSANNE	FRONT GENET	APR 11	2022	13	10.3389/fgene.2022.865695	http://dx.doi.org/10.3389/fgene.2022.865695	Genetics & Heredity	Science Citation Index Expanded (SCI-EXPANDED)	35480327	View Full Record in Web of Science
J	Wardowska, Anna	m6A RNA Methylation in Systemic Autoimmune Diseases-A New Target for Epigenetic-Based Therapy?	PHARMACEUTICALS	English	Review	epigenetic; autoimmune disease; RNA methylome; m6A; N6-methyladenosine; epidrugs	OBESITY-ASSOCIATED GENE; N-6-METHYLADENOSINE M(6)A METHYLATION; HISTONE DEACETYLASE INHIBITOR; SINGLE-NUCLEOTIDE-RESOLUTION; FIBROBLAST-LIKE SYNOVIOCYTES; MESSENGER-RNA; MULTIPLE-SCLEROSIS; DNA METHYLATION; FAT MASS; T-CELLS	The general background of autoimmune diseases is a combination of genetic, epigenetic and environmental factors, that lead to defective immune reactions. This erroneous immune cell activation results in an excessive production of autoantibodies and prolonged inflammation. During recent years epigenetic mechanisms have been extensively studied as potential culprits of autoreactivity. Alike DNA and…	[Wardowska, Anna] Med Univ Gdansk, Dept Embryol, PL-80210 Gdansk, Poland	Fahrenheit Universities; Medical University Gdansk	Wardowska, A (corresponding author), Med Univ Gdansk, Dept Embryol, PL-80210 Gdansk, Poland.	anna.wardowska@gumed.edu.pl	232	15	17	MDPI	BASEL	PHARMACEUTICALS-BASE	MAR	2021	14	10.3390/ph14030218	http://dx.doi.org/10.3390/ph14030218	Chemistry, Medicinal; Pharmacology & Pharmacy	Science Citation Index Expanded (SCI-EXPANDED)	33807762	View Full Record in Web of Science
J	Xu, Menghui; Zhuo, Ruhao; Tao, Shengxiang; Liang, Yaxu; Liu, Chunru; Liu, Qingyang; Wang, Tian; Zhong, Xiang	M6A RNA Methylation Mediates NOD1/NF-kB Signaling Activation in the Liver of Piglets Challenged with Lipopolysaccharide	ANTIOXIDANTS	English	Article	m(6)A modification; NOD1; NF-kappa B; inflammation; immune; oxidative stress; piglet	NF-KAPPA-B; HEPATIC LIPID-METABOLISM; NOD1; RECOGNITION; INJURY; HIF-1-ALPHA; SENSOR	N-6-methyladenosine (m(6)A) is the most abundant internal modification that widely participates in various immune and inflammatory responses; however, its regulatory mechanisms in the inflammation of liver induced by lipopolysaccharide in piglets remain largely unknown. In the present study, piglets were intraperitoneally injected with 80 mu g/kg LPS or an equal dose of sterile saline. Results in…	[Xu, Menghui; Zhuo, Ruhao; Tao, Shengxiang; Liang, Yaxu; Wang, Tian; Zhong, Xiang] Nanjing Agr Univ, Coll Anim Sci & Technol, Nanjing 210095, Peoples R China; [Liu, Chunru] Nanjing Agr Univ, Coll Vet Med, Nanjing 210095, Peoples R China; [Liu, Qingyang] Nanjing Agr Univ, Coll Life Sci, Nanjing 210095, Peoples R China	Nanjing Agricultural University; Nanjing Agricultural University; Nanjing Agricultural University	Zhong, X (corresponding author), Nanjing Agr Univ, Coll Anim Sci & Technol, Nanjing 210095, Peoples R China.	zhongxiang@njau.edu.cn	58	9	11	MDPI	BASEL	ANTIOXIDANTS-BASEL	OCT	2022	11	10.3390/antiox11101954	http://dx.doi.org/10.3390/antiox11101954	Biochemistry & Molecular Biology; Chemistry, Medicinal; Food Science & Technology	Science Citation Index Expanded (SCI-EXPANDED)	36290677	View Full Record in Web of Science
J	Huang, Xinwei; Lv, Dongjin; Yang, Xiao; Li, Min; Zhang, Hong	m6A RNA methylation regulators could contribute to the occurrence of chronic obstructive pulmonary disease	JOURNAL OF CELLULAR AND MOLECULAR MEDICINE	English	Article	bioinformatics; chronic obstructive pulmonary disease; IGF2BP3; m6A RNA methylation regulators; METTL3	HUMAN AIRWAY EPITHELIUM; MESSENGER-RNA; GENE-EXPRESSION; INFLAMMATION; ENZYMES; CANCER; CYP1B1; CELLS; DNA	N6-methyladenosine (m6A) RNA methylation, the most prevalent internal chemical modification of mRNA, has been reported to participate in the progression of various tumours via the dynamic regulation of m6A RNA methylation regulators. However, the role of m6A RNA methylation regulators in chronic obstructive pulmonary disease (COPD) has never been reported. This study aimed to determine the expres…	[Huang, Xinwei; Zhang, Hong] Tongji Univ, Translat Res Inst Brain & Brain Like Intelligence, Shanghai Peoples Hosp 4, Sch Med, 1878 North Sichuan Rd, Shanghai 200081, Peoples R China; [Huang, Xinwei; Yang, Xiao; Li, Min; Zhang, Hong] Tongji Univ, Dept Rehabil Med, Shanghai Peoples Hosp 4, Sch Med, 1878 North Sichuan Rd, Shanghai 200081, Peoples R China; [Lv, Dongjin] Kunming Med Univ, Affiliated …	Tongji University; Tongji University; Kunming Medical University	Huang, XW (corresponding author), Tongji Univ, Translat Res Inst Brain & Brain Like Intelligence, Shanghai Peoples Hosp 4, Sch Med, 1878 North Sichuan Rd, Shanghai 200081, Peoples R China.;Zhang, H (corresponding author), Tongji Univ, Dept Rehabil Med, Shanghai Peoples Hosp 4, Sch Med, 1878 North Sichuan Rd, Shanghai 200081, Peoples R China.	huanggenetics@163.com; 2000012@tongji.edu.cn	48	54	58	WILEY	HOBOKEN	J CELL MOL MED	NOV	2020	24	10.1111/jcmm.15848	http://dx.doi.org/10.1111/jcmm.15848	Cell Biology; Medicine, Research & Experimental	Science Citation Index Expanded (SCI-EXPANDED)	32961012	View Full Record in Web of Science
J	Liu, Pingyu; Li, Fuming; Lin, Jianhuang; Fukumoto, Takeshi; Nacarelli, Timothy; Hao, Xue; Kossenkov, Andrew, V; Simon, M. Celeste; Zhang, Rugang	m6A-independent genome-wide METTL3 and METTL14 redistribution drives the senescence-associated secretory phenotype	NATURE CELL BIOLOGY	English	Article		RNA-METHYLATION; N-6-METHYLADENOSINE; CANCER; CELLS; INFLAMMATION; TRANSLATION; REVEALS	Methyltransferase-like 3 (METTL3) and 14 (METTL14) are core subunits of the methyltransferase complex that catalyses messenger RNA N-6-methyladenosine (m(6)A) modification. Despite the expanding list of m(6)A-dependent functions of the methyltransferase complex, the m(6)A-independent function of the METTL3 and METTL14 complex remains poorly understood. Here we show that genome-wide redistribution…	[Liu, Pingyu; Lin, Jianhuang; Fukumoto, Takeshi; Nacarelli, Timothy; Hao, Xue; Kossenkov, Andrew, V; Zhang, Rugang] Wistar Inst Anat & Biol, Immunol Microenvironm & Metastasis Program, 3601 Spruce St, Philadelphia, PA 19104 USA; [Li, Fuming; Simon, M. Celeste] Univ Penn, Abramson Family Canc Res Inst, Philadelphia, PA 19104 USA; [Simon, M. Celeste] Univ Penn, Dept Cell & Dev Biol, Perelman Sch Me…	The Wistar Institute; University of Pennsylvania; University of Pennsylvania	Zhang, RG (corresponding author), Wistar Inst Anat & Biol, Immunol Microenvironm & Metastasis Program, 3601 Spruce St, Philadelphia, PA 19104 USA.	rzhang@wistar.org	49	83	91	NATURE PORTFOLIO	BERLIN	NAT CELL BIOL	APR	2021	23	10.1038/s41556-021-00656-3	http://dx.doi.org/10.1038/s41556-021-00656-3	Cell Biology	Science Citation Index Expanded (SCI-EXPANDED)	33795874	View Full Record in Web of Science
J	Song, Jinyi; Zhang, Lele; Li, Chenhui; Maimaiti, Munire; Sun, Jing; Hu, Jiameng; Li, Lu; Zhang, Xiang; Wang, Chen; Hu, Haiyang	m6A-mediated modulation coupled with transcriptional regulation shapes long noncoding RNA repertoire of the cGAS-STING signaling	COMPUTATIONAL AND STRUCTURAL BIOTECHNOLOGY JOURNAL	English	Article	lncRNA; cGAS-STING signaling; Transcriptional regulation; Transcription factor; N-6-methyladenosine (m(6)A)	CYCLIC GMP-AMP; DNA SENSOR CGAS; ENDOGENOUS 2ND-MESSENGER; PROMOTES; ACTIVATION; ADAPTER; INFLAMMATION; PROGRESSION; METASTASIS; EXPRESSION	The cGAS-STING signaling plays pivotal roles not only in host antiviral defense but also in various noninfectious contexts. Compared with protein-coding genes, much less was known about long noncoding RNAs involved in this pathway. Here, we performed an integrative study to elucidate the lncRNA repertoire and the mechanisms modulating lncRNA's expression following cGAS-STING signaling activation.…	[Song, Jinyi; Li, Chenhui; Maimaiti, Munire; Sun, Jing; Hu, Jiameng; Li, Lu; Zhang, Xiang; Wang, Chen; Hu, Haiyang] China Pharmaceut Univ, Sch Life Sci & Technol, State Key Lab Nat Med, 639 Longmian Ave, Nanjing, Peoples R China; [Zhang, Lele] Tongji Univ, Shanghai Pulm Hosp, Sch Med, Shanghai, Peoples R China	China Pharmaceutical University; Tongji University	Wang, C; Hu, HY (corresponding author), China Pharmaceut Univ, Sch Life Sci & Technol, State Key Lab Nat Med, 639 Longmian Ave, Nanjing, Peoples R China.;Zhang, LL (corresponding author), Tongji Univ, Shanghai Pulm Hosp, Sch Med, Shanghai, Peoples R China.	murongdule@163.com; cwang1971@cpu.edu.cn; haiyanghu@cpu.edu.cn	76	5	5	ELSEVIER	AMSTERDAM	COMPUT STRUCT BIOTEC		2022	20	10.1016/j.csbj.2022.04.002	http://dx.doi.org/10.1016/j.csbj.2022.04.002	Biochemistry & Molecular Biology; Biotechnology & Applied Microbiology	Science Citation Index Expanded (SCI-EXPANDED)	35495108	View Full Record in Web of Science
J	Liang, Lian; Liu, Siqi; Wu, Qingyu; Chen, Ran; Jiang, Shanping; Yang, Zhengfei	m6A-mediated upregulation of miRNA-193a aggravates cardiomyocyte apoptosis and inflammatory response in sepsis-induced cardiomyopathy via the METTL3/miRNA-193a/BCL2L2 pathway	EXPERIMENTAL CELL RESEARCH	English	Article	miRNA-193a; m6A; Sepsis-induced cardiomyopathy; Apoptosis	RNA; DYSFUNCTION; METHYLATION	The impact of N6-methyladenosine (m6A) modification on pri-miRNA in sepsis-induced cardiomyopathy (SICM), and its underlying regulatory mechanism, have not been fully elucidated. We successfully constructed a SICM mice model through cecal ligation and puncture (CLP). In vitro, a lipopolysaccharide (LPS)-induced HL-1 cells model was also established. The results showed that sepsis frequently resul…	[Liang, Lian; Liu, Siqi; Jiang, Shanping; Yang, Zhengfei] Sun Yat Sen Univ, Sun Yat Sen Mem Hosp, Guangzhou, Peoples R China; [Wu, Qingyu] Guangzhou Univ Chinese Med, Clin Med Coll 8, Foshan, Peoples R China; [Chen, Ran] Guangzhou Med Univ, Guangzhou Peoples Hosp 8, Guangzhou, Peoples R China; [Yang, Zhengfei] Dept Emergency, 107 Yanjiang Xi Lu, Guangzhou 510120, Guangdong, Peoples R China; [Jian…	Sun Yat Sen University; Guangzhou University of Chinese Medicine; Guangzhou Medical University	Yang, ZF (corresponding author), Dept Emergency, 107 Yanjiang Xi Lu, Guangzhou 510120, Guangdong, Peoples R China.;Jiang, SP (corresponding author), Dept Resp & Crit Care Med, 107 Yanjiang Xi Lu, Guangzhou 510120, Guangdong, Peoples R China.	jiangshp@mail.sysu.edu.cn; yangzhengfei@vip.163.com	41	4	5	ELSEVIER INC	SAN DIEGO	EXP CELL RES	SEP 1	2023	430	10.1016/j.yexcr.2023.113712	http://dx.doi.org/10.1016/j.yexcr.2023.113712	Oncology; Cell Biology	Science Citation Index Expanded (SCI-EXPANDED)	37414203	View Full Record in Web of Science
J	Zhang, Tingting; Liu, Hengqi; Gao, Fenghua; Gong, Wenchen; Cui, Yaoli; He, Jin; Li, Lanfang; Qiu, Lihua; Qian, Zhengzi; Zhou, Shiyong; Meng, Bin; Ren, Xiubao; Zhang, Huilai; Wang, Xianhuo	m6A-Regulator Expression Signatures Identify a Subset of Follicular Lymphoma Harboring an Exhausted Tumor Microenvironment	FRONTIERS IN IMMUNOLOGY	English	Article	m6A; tumor microenvironment; immunotherapy; follicular lymphoma; exhaustion	IFN-GAMMA; RNA; M(6)A; DIFFERENTIATION; LEUKEMIA	The role of N6-methyladenosine (m6A) modification in tumor microenvironment has rarely been explored in follicular lymphoma (FL). To examine the role of m6A modification in biological behavior, especially the immune landscape of FL, we utilized the Gene Expression Omnibus database to determine the expression signatures of m6A-regulators by unsupervised clustering, and then condense into a risk sc…	[Zhang, Tingting; Liu, Hengqi; Gao, Fenghua; Cui, Yaoli; He, Jin; Li, Lanfang; Qiu, Lihua; Qian, Zhengzi; Zhou, Shiyong; Zhang, Huilai; Wang, Xianhuo] Tianjin Med Univ Canc Inst & Hosp, Natl Clin Res Ctr Canc, Dept Lymphoma, Tianjin, Peoples R China; [Zhang, Tingting; Liu, Hengqi; Gao, Fenghua; Cui, Yaoli; He, Jin; Li, Lanfang; Qiu, Lihua; Qian, Zhengzi; Zhou, Shiyong; Zhang, Huilai; Wang, Xianhu…	Tianjin Medical University; Tianjin Medical University; Tianjin Medical University	Zhang, HL; Wang, XH (corresponding author), Tianjin Med Univ Canc Inst & Hosp, Natl Clin Res Ctr Canc, Dept Lymphoma, Tianjin, Peoples R China.;Zhang, HL; Wang, XH (corresponding author), Sino US Ctr Lymphoma & Leukemia Res, Tianjins Clin Res Ctr Canc, Key Lab Canc Prevent & Therapy, Tianjin, Peoples R China.	zhlwgq@126.com; tjzlyy_xianhuow@163.com	48	4	4	FRONTIERS MEDIA SA	LAUSANNE	FRONT IMMUNOL	JUN 6	2022	13	10.3389/fimmu.2022.922471	http://dx.doi.org/10.3389/fimmu.2022.922471	Immunology	Science Citation Index Expanded (SCI-EXPANDED)	35734168	View Full Record in Web of Science
J	Zhang, Guoan; Li, Xuewen; Huang, Xiaoyan	m6A-related bioinformatics analysis and functional characterization reveals that METTL3-mediated NPC1L1 mRNA hypermethylation facilitates progression of atherosclerosis via inactivation of the MAPK pathway	INFLAMMATION RESEARCH	English	Article	N-6-Methyladenosine; METTL3; NPC1L1; Human umbilical vein endothelial cells; Atherosclerosis	PICK C1-LIKE 1; METHYLATION; N6-METHYLADENOSINE; INFLAMMATION; STRESS	Objective Accumulating evidence has demonstrated that N6-methyladenosine (m6A) plays important roles in many major diseases, including atherosclerosis (AS). In the present study, we aimed to explore the transcriptomic m6A landscape of endothelial function-associated genes and identify potential regulators in AS progression. Methods The GEO data (GSE142386) from MeRIP-seq in human umbilical vein e…	[Zhang, Guoan; Li, Xuewen] Shaanxi Prov Peoples Hosp, Dept Cardiovasc Surg, Xian 710068, Shaanxi, Peoples R China; [Huang, Xiaoyan] Shaanxi Prov Peoples Hosp, Shaanxi Prov Key Lab Infect & Immune Dis, 256 West Youyi Rd, Xian 710068, Shaanxi, Peoples R China	Xi'an Medical University; Xi'an Medical University	Huang, XY (corresponding author), Shaanxi Prov Peoples Hosp, Shaanxi Prov Key Lab Infect & Immune Dis, 256 West Youyi Rd, Xian 710068, Shaanxi, Peoples R China.	gant8174@163.com	36	6	7	SPRINGER BASEL AG	BASEL	INFLAMM RES	MAR	2023	72	10.1007/s00011-022-01681-0	http://dx.doi.org/10.1007/s00011-022-01681-0	Cell Biology; Immunology	Science Citation Index Expanded (SCI-EXPANDED)	36583755	View Full Record in Web of Science
J	Yu, Qingxiong; Zhu, Hainan; Wang, Huijing; Aimaier, Rehanguli; Chung, Manhon; Wang, Zhichao; Li, Qingfeng	M6A-Related Bioinformatics Analysis Reveals a New Prognostic Risk Signature in Cutaneous Malignant Melanoma	DISEASE MARKERS	English	Article		CANCER CELLS; RNA; GENE; PROGRESSION	Cutaneous malignant melanoma (CMM) is the most deadly skin cancer worldwide. Despite advances in the treatments of CMM, its incidence and mortality rates are still increasing. N6-methyladenosine (m6A) is the most common form of RNA modification and has attracted increasing interest in cancer initiation and progression. However, the role of m6A regulators in CMM and their correlation with prognosi…	[Yu, Qingxiong; Zhu, Hainan; Wang, Huijing; Aimaier, Rehanguli; Chung, Manhon; Wang, Zhichao; Li, Qingfeng] Shanghai Jiao Tong Univ, Shanghai Peoples Hosp 9, Dept Plast & Reconstruct Surg, Sch Med, 639 Zhizaoju Rd, Shanghai 200011, Peoples R China; [Wang, Huijing] Zhejiang Univ, Dept Plast Surg, Sch Med, Affiliated Hosp 2, Hangzhou 310017, Peoples R China	Shanghai Jiao Tong University; Zhejiang University	Wang, ZC; Li, QF (corresponding author), Shanghai Jiao Tong Univ, Shanghai Peoples Hosp 9, Dept Plast & Reconstruct Surg, Sch Med, 639 Zhizaoju Rd, Shanghai 200011, Peoples R China.	yuqingx@hotmail.com; ben64053326@hotmail.com; wenzjign@163.com; dr_rayhan@163.com; 2590911458@qq.com; shmuwzc@163.com; dr.liqingfeng@shsmu.edu.cn	47	3	3	HINDAWI LTD	LONDON	DIS MARKERS	JUN 6	2022	2022	10.1155/2022/8114731	http://dx.doi.org/10.1155/2022/8114731	Biotechnology & Applied Microbiology; Genetics & Heredity; Medicine, Research & Experimental; Pathology	Science Citation Index Expanded (SCI-EXPANDED)	35722625	View Full Record in Web of Science
J	Li, ChangYan; Su, Feng; Liang, Zhang; Zhang, Le; Liu, Fang; Fan, WenXing; Li, Zhen	Macrophage M1 regulatory diabetic nephropathy is mediated by m6A methylation modification of lncRNA expression	MOLECULAR IMMUNOLOGY	English	Article	M6A; FTO; Diabetic nephropathy; Macrophage M1; Methylation	M(6)A	Immune and inflammatory responses have been identified to play an important role in diabetic nephropathy (DN) (H. Zhou et al. (2021)). It was found that the part of long non-coding RNA (LncRNA) in nephrosis is related to the negative regulation of MicroRNA (miRNA) (C. Gao et al., 2020), which mechanism is unclear; N6-methyladenosine (m6A) is one of the most common mRNA modifications in eukaryotes…	[Li, ChangYan; Su, Feng; Fan, WenXing] Kunming Med Univ, Dept Nephrol, Affiliated Hosp 1, 295 Xichang Rd, Kunming 650032, Yunnan, Peoples R China; [Liang, Zhang] Kunming Med Univ, Dept Sci & Technol, Kunming 650500, Yunnan, Peoples R China; [Zhang, Le] Univ Calif Riverside, Inst Integrat Genome Biol, Riverside, CA 92521 USA; [Liu, Fang] Sichuan Univ, West China Hosp, Dept Nephrol, Chengdu 610041,…	Kunming Medical University; Kunming Medical University; University of California System; University of California Riverside; Sichuan University; Kunming Medical University	Fan, WX (corresponding author), Kunming Med Univ, Dept Nephrol, Affiliated Hosp 1, 295 Xichang Rd, Kunming 650032, Yunnan, Peoples R China.;Li, Z (corresponding author), Kunming Med Univ, Organ Transplantat Ctr, Affiliated Hosp 1, 295 Xichang Rd, Kunming 650032, Yunnan, Peoples R China.	fanwx2020@163.com; 24225695@qq.com	30	20	22	PERGAMON-ELSEVIER SCIENCE LTD	OXFORD	MOL IMMUNOL	APR	2022	144	10.1016/j.molimm.2022.02.008	http://dx.doi.org/10.1016/j.molimm.2022.02.008	Biochemistry & Molecular Biology; Immunology	Science Citation Index Expanded (SCI-EXPANDED)	35168108	View Full Record in Web of Science
J	Fang, Ming; Deng, Jun; Zhou, Qiangping; Hu, Zhengbang; Yang, Lixia	Maslinic acid protects against pressure-overload-induced cardiac hypertrophy by blocking METTL3-mediated m6A methylation	AGING-US	English	Article	myocardial hypertrophy; maslinic acid (MA); N6-methyladenosine (m(6)A); methyltransferase-like 3 (METTL3)		Coordinated response of the heart to physiological stressors (including stress overload, ischemia, hypothyroidism, and metabolic signals) is a hallmark of heart disease. However, effective treatment and its molecular targets are unknown. Although Maslinic Acid (MA) has been shown to inhibit inflammatory responses with strong anti-tumor, anti-bacterial, and antioxidant effects, information on its …	[Fang, Ming; Deng, Jun; Zhou, Qiangping; Hu, Zhengbang] Nanchang Univ, Dept Emergency, Affiliated Hosp 1, Nanchang, Jiangxi, Peoples R China; [Yang, Lixia] Nanchang Univ, Dept Infect Dis, Affiliated Hosp 1, Nanchang, Jiangxi, Peoples R China	Nanchang University; Nanchang University	Yang, LX (corresponding author), Nanchang Univ, Dept Infect Dis, Affiliated Hosp 1, Nanchang, Jiangxi, Peoples R China.	ndyfy02147@ncu.edu.cn.com	29	7	8	IMPACT JOURNALS LLC	ORCHARD PARK	AGING-US	MAR 31	2022	14			Cell Biology; Geriatrics & Gerontology	Science Citation Index Expanded (SCI-EXPANDED)	35347085	View Full Record in Web of Science
J	Wang, Lin; Fan, Yi-fu; Li, Bing-rui; Sun, Wen-hui; Wang, Li-na	Maslinic Acid Suppresses High Glucose-induced Inflammation by Epigenetically Inhibiting TXNIP Expression	CURRENT MEDICAL SCIENCE	English	Article	maslinic acid; inflammation; N6-methyladenosine; RNA demethylase ALKBH5	DIABETES-MELLITUS; RNA; N-6-METHYLADENOSINE; STRESS	Objective: Hyperglycemia-induced inflammation and subsequent endothelial injuries ultimately lead to the pathogenesis of cardiovascular diseases associated with high mortality, such as atherosclerosis. Maslinic acid (MA) is a phytochemical with anti-inflammatory activity. However, it remains unknown whether it can inhibit diabetes-associated cardiovascular inflammation. The present study aimed to…	[Wang, Lin; Fan, Yi-fu; Wang, Li-na] Naval Med Univ, Dept Tradit Chinese Med, Shanghai 200433, Peoples R China; [Li, Bing-rui; Sun, Wen-hui] Naval Med Univ, Sch Basic Med, Shanghai 200433, Peoples R China	Naval Medical University; Naval Medical University	Wang, LN (corresponding author), Naval Med Univ, Dept Tradit Chinese Med, Shanghai 200433, Peoples R China.	wanglin1210@163.com; rena1022@163.com	40	4	4	SPRINGER	NEW YORK	CURR MED SCI	DEC	2022	42	10.1007/s11596-022-2657-6	http://dx.doi.org/10.1007/s11596-022-2657-6	Medicine, Research & Experimental	Science Citation Index Expanded (SCI-EXPANDED)	36350490	View Full Record in Web of Science
J	Sun, Zewei; Chen, Wenjing; Wang, Zhen; Wang, Shuai; Zan, Jie; Zheng, Liangrong; Zhao, Wenting	Matr3 reshapes m6A modification complex to alleviate macrophage inflammation during atherosclerosis	CLINICAL IMMUNOLOGY	English	Article	Atherosclerosis; N6-methyladenosine (m6A) modification; Mettl14; Matrin-3; Macrophage	RNA METHYLATION; MESSENGER-RNA; PATHOPHYSIOLOGY; CHOLESTEROL	Atherosclerosis, characterized as the chronic inflammation of the arterial wall, is one of the leading causes of coronary artery disease (CAD), and macrophages are found to play essential roles in the initiation and pro-gression of inflammation in atherosclerosis. N6-methyladenosine (m6A) modification, as the most abundant epi-transcriptomic modification in mRNA, is found to mediate the atherogen…	[Sun, Zewei; Wang, Zhen; Zheng, Liangrong; Zhao, Wenting] Zhejiang Univ, Affiliated Hosp 1, Coll Med, Dept Cardiol, 79 Qingchun Rd, Hangzhou 310003, Peoples R China; [Chen, Wenjing] Zhejiang Univ, Affiliated Hosp 2, Sch Med, Ctr Neurosci,State Key Lab Modern Opt Instrumentat, Hangzhou 310058, Peoples R China; [Chen, Wenjing] Zhejiang Univ, Affiliated Hosp 2, Sch Med, Dept Neurobiol,State Key Lab …	Zhejiang University; Zhejiang University; Zhejiang University; Zhejiang University; Guangdong University of Technology	Zheng, LR; Zhao, WT (corresponding author), Zhejiang Univ, Affiliated Hosp 1, Coll Med, Dept Cardiol, 79 Qingchun Rd, Hangzhou 310003, Peoples R China.;Zan, J (corresponding author), Guangdong Univ Technol, Sch Biomed & Pharmaceut Sci, Guangzhou 510006, Peoples R China.	zanj@gdut.edu.cn; 1191066@zju.edu.cn; 11518182@zju.edu.cn	36	16	17	ACADEMIC PRESS INC ELSEVIER SCIENCE	SAN DIEGO	CLIN IMMUNOL	DEC	2022	245	10.1016/j.clim.2022.109176	http://dx.doi.org/10.1016/j.clim.2022.109176	Immunology	Science Citation Index Expanded (SCI-EXPANDED)	36368640	View Full Record in Web of Science
J	Huang, Yue; Yan, Jingli; Li, Qi; Li, Jiafei; Gong, Shouzhe; Zhou, Hu; Gan, Jianhua; Jiang, Hualiang; Jia, Gui-Fang; Luo, Cheng; Yang, Cai-Guang	Meclofenamic acid selectively inhibits FTO demethylation of m6A over ALKBH5	NUCLEIC ACIDS RESEARCH	English	Article		OXIDATIVE DEMETHYLATION; CRYSTAL-STRUCTURES; RNA DEMETHYLASE; MESSENGER-RNA; ALKYLATION DAMAGE; COMMON VARIANT; STRANDED-DNA; NUCLEAR-RNA; FAT MASS; REPAIR	Two human demethylases, the fat mass and obesity-associated (FTO) enzyme and ALKBH5, oxidatively demethylate abundant N-6-methyladenosine (m(6)A) residues in mRNA. Achieving a method for selective inhibition of FTO over ALKBH5 remains a challenge, however. Here, we have identified meclofenamic acid (MA) as a highly selective inhibitor of FTO. MA is a non-steroidal, anti-inflammatory drug that mec…	[Huang, Yue; Li, Qi; Li, Jiafei; Gong, Shouzhe; Zhou, Hu; Yang, Cai-Guang] Chinese Acad Sci, Shanghai Inst Mat Med, CAS Key Lab Receptor Res, Shanghai 201203, Peoples R China; [Yan, Jingli; Jia, Gui-Fang] Peking Univ, Synthet & Funct Biomol Ctr, Key Lab Bioorgan Chem & Mol Engn, Beijing Natl Lab Mol Sci,Minist Educ,Coll Chem &, Beijing 100871, Peoples R China; [Gan, Jianhua] Fudan Univ, Sch Life …	Chinese Academy of Sciences; Shanghai Institute of Materia Medica, CAS; Chinese Academy of Sciences; Peking University; Fudan University; Chinese Academy of Sciences; Shanghai Institute of Materia Medica, CAS	Yang, CG (corresponding author), Chinese Acad Sci, Shanghai Inst Mat Med, CAS Key Lab Receptor Res, Shanghai 201203, Peoples R China.	guifangjia@pku.edu.cn; cluo@simm.ac.cn; yangcg@simm.ac.cn	66	467	513	OXFORD UNIV PRESS	OXFORD	NUCLEIC ACIDS RES	JAN	2015	43	10.1093/nar/gku1276	http://dx.doi.org/10.1093/nar/gku1276	Biochemistry & Molecular Biology	Science Citation Index Expanded (SCI-EXPANDED)	25452335	View Full Record in Web of Science
J	Zhu, Ruigong; Ji, Xian; Wu, Xuan; Chen, Jiajing; Li, Xuesong; Jiang, Hong; Fu, Haiping; Wang, Hui; Lin, Zhe; Tang, Xin; Sun, Shixiu; Li, Qingguo; Wang, Bingjian; Chen, Hongshan	Melatonin antagonizes ovarian aging via YTHDF2-MAPK-NF-κB pathway	GENES & DISEASES	English	Article	Gene expression; Inflammation; Melatonin; Senescence; YTHDF2	MESSENGER-RNA; GENE-EXPRESSION; MOLECULAR-MECHANISMS; SENESCENCE; METHYLATION; CELLS; N-6-METHYLADENOSINE; DIFFERENTIATION; IDENTIFICATION; TRANSLATION	Cellular senescence is closely associated with age-related diseases. Ovarian aging, a special type of organ senescence, is the pathophysiological foundation of the diseases of the reproductive system. It is characterized by the loss of integrity of the surface epithelium and a gradual decrease in the number of human ovarian surface epithelial cells (HOSEpiCs). To contribute to the research on del…	[Zhu, Ruigong; Ji, Xian; Wu, Xuan; Chen, Jiajing; Li, Xuesong; Jiang, Hong; Fu, Haiping; Wang, Hui; Lin, Zhe; Tang, Xin; Sun, Shixiu; Chen, Hongshan] Nanjing Med Univ, Sch Pharm, Key Lab Cardiovasc & Cerebrovasc Med, Nanjing 211166, Jiangsu, Peoples R China; [Li, Qingguo; Chen, Hongshan] Nanjing Med Univ, Affiliated Hosp 2, Dept Cardiothorac Surg, Nanjing 210003, Jiangsu, Peoples R China; [Chen, …	Nanjing Medical University; Nanjing Medical University; Nanjing Medical University; Nanjing Medical University	Chen, HS (corresponding author), Nanjing Med Univ, Sch Pharm, Key Lab Cardiovasc & Cerebrovasc Med, Nanjing 211166, Jiangsu, Peoples R China.;Li, QG (corresponding author), Nanjing Med Univ, Affiliated Hosp 2, Dept Cardiothorac Surg, Nanjing 210003, Jiangsu, Peoples R China.;Wang, BJ (corresponding author), Nanjing Med Univ, Huaian Peoples Hosp 1, Dept Cardiol, Huaian 223399, Jiangsu, Peoples R C…	lqg0235062@163.com; wofcardio96@126.com; hongshanchen@njmu.edu.cn	65	13	16	ELSEVIER	AMSTERDAM	GENES DIS	MAR	2022	9	10.1016/j.gendis.2020.08.005	http://dx.doi.org/10.1016/j.gendis.2020.08.005	Biochemistry & Molecular Biology; Genetics & Heredity	Science Citation Index Expanded (SCI-EXPANDED)	35224163	View Full Record in Web of Science
J	Pirola, Carlos J.; Sookoian, Silvia	Metabolic dysfunction-associated fatty liver disease: advances in genetic and epigenetic implications	CURRENT OPINION IN LIPIDOLOGY	English	Review	chromatin; epitranscriptomics; mitochondria; quantitative trait loci; RNA methylation; transcriptome	NONALCOHOLIC STEATOHEPATITIS; CONFERS SUSCEPTIBILITY; ALCOHOL-CONSUMPTION; INSULIN-RESISTANCE; WIDE ASSOCIATION; SEVERITY; VARIANT; PNPLA3; RISK; SIGNATURE	Purpose of review Fatty liver associated with metabolic dysfunction, also known under the acronym NAFLD (nonalcoholic fatty liver disease) is the leading global cause of chronic liver disease. In this review, we address the state of research on genetics and epigenetics of NAFLD with focus on key discoveries and conceptual advances over the past 2 years. Recent findings The analysis of NAFLD-assoc…	[Pirola, Carlos J.; Sookoian, Silvia] Univ Buenos Aires, Sch Med, Inst Med Res A Lanari, Buenos Aires, DF, Argentina; [Pirola, Carlos J.] Univ Buenos Aires, Dept Mol Genet & Biol Complex Dis, Inst Med Res IDIM, Natl Sci & Tech Res Council CONICET, Buenos Aires, DF, Argentina; [Sookoian, Silvia] Univ Buenos Aires, Dept Clin & Mol Hepatol, Inst Med Res IDIM, Natl Sci & Tech Res Council CONICET, Bue…	University of Buenos Aires; University of Buenos Aires; Centro Nacional Patagonico (CENPAT); Consejo Nacional de Investigaciones Cientificas y Tecnicas (CONICET); University of Buenos Aires; Centro Nacional Patagonico (CENPAT); Consejo Nacional de Investigaciones Cientificas y Tecnicas (CONICET)	Pirola, CJ; Sookoian, S (corresponding author), Consejo Nacl Invest Cient & Tecn, Inst Invest Med, IDIM, Combatientes Malvinas 3150, RA-1427 Buenos Aires, DF, Argentina.	pirola.carlos@conicet.gov.ar; ssookoian@intramed.net	56	11	11	LIPPINCOTT WILLIAMS & WILKINS	PHILADELPHIA	CURR OPIN LIPIDOL	APR	2022	33	10.1097/MOL.0000000000000814	http://dx.doi.org/10.1097/MOL.0000000000000814	Biochemistry & Molecular Biology; Endocrinology & Metabolism; Peripheral Vascular Disease	Science Citation Index Expanded (SCI-EXPANDED)	34966133	View Full Record in Web of Science
J	Lustgarten, Michael S.; Fielding, Roger A.	Metabolites Associated With Circulating Interleukin-6 in Older Adults	JOURNALS OF GERONTOLOGY SERIES A-BIOLOGICAL SCIENCES AND MEDICAL SCIENCES	English	Article	Inflammation; Metabolomics; Aging	ARYL-HYDROCARBON RECEPTOR; PULMONARY INDOLEAMINE 2,3-DIOXYGENASE; IMMUNODEFICIENCY-VIRUS TYPE-1; INTERFERON-GAMMA; PPAR-ALPHA; PEROXISOME PROLIFERATORS; PHYSICAL FUNCTION; MUSCLE STRENGTH; INFLAMMATION; TRYPTOPHAN	Background: Circulating levels of the pro-inflammatory cytokine interleukin-6 (IL-6) levels are elevated in older adults, but mechanisms are unclear. In the current study, we used an untargeted metabolomic approach to develop an improved understanding about mechanisms related to circulating IL-6 in older adults. Methods: Serum IL-6 values were log-transformed to normalize its distribution. Multiv…	[Lustgarten, Michael S.; Fielding, Roger A.] Tufts Univ, Nutr Exercise Physiol & Sarcopenia Lab, Jean Mayer USDA Human Nutr Res Ctr, 711 Washington St, Boston, MA 02111 USA	Tufts University; United States Department of Agriculture (USDA)	Fielding, RA (corresponding author), Tufts Univ, Nutr Exercise Physiol & Sarcopenia Lab, Jean Mayer USDA Human Nutr Res Ctr, 711 Washington St, Boston, MA 02111 USA.	roger.fielding@tufts.edu	73	31	34	OXFORD UNIV PRESS INC	CARY	J GERONTOL A-BIOL	SEP	2017	72	10.1093/gerona/glw039	http://dx.doi.org/10.1093/gerona/glw039	Geriatrics & Gerontology; Gerontology	Science Citation Index Expanded (SCI-EXPANDED); Social Science Citation Index (SSCI)	26975982	View Full Record in Web of Science
J	Jiang, Feng; Hu, Yifang; Liu, Xiaoqin; Wang, Ming; Wu, Chuyan	Methylation Pattern Mediated by m6A Regulator and Tumor Microenvironment Invasion in Lung Adenocarcinoma	OXIDATIVE MEDICINE AND CELLULAR LONGEVITY	English	Article		IMMUNE CONTEXTURE; CANCER; CELLS; IMPACT; SET	Background. Recent research has established the existence of epigenetic modulation of the immune response. The possible involvement of RNA-n6-methyladenosine (m(6)A) alteration in tumor microenvironment (TME) cell invasion, on the other hand, is unknown. Methods. Based on 23 m(6)A regulators, we examined the alteration patterns of m(6)A in 629 LUAD tissues and comprehensively connected these modi…	[Jiang, Feng] Fudan Univ, Obstet & Gynecol Hosp, Dept Neonatol, Shanghai 200011, Peoples R China; [Hu, Yifang] Nanjing Med Univ, Affiliated Hosp 1, Dept Geriatr, Nanjing 210029, Peoples R China; [Liu, Xiaoqin] Nanjing Med Univ, Clin Med Coll, Affiliated Nanjing Drum Tower Hosp, Dept Pulm & Crit Care Med, Nanjing 210008, Jiangsu, Peoples R China; [Wang, Ming] Nanjing Med Univ, Affiliated Hosp 1, P…	Fudan University; Nanjing Medical University; Nanjing Medical University; Nanjing Medical University; Nanjing Medical University	Wu, CY (corresponding author), Nanjing Med Univ, Affiliated Hosp 1, Dept Rehabil Med, Nanjing 210029, Peoples R China.	dxyjiang@163.com; 973682801@qq.com; liuxiaoqinyi@163.com; 44374495@qq.com; chuyan_w@hotmail.com	41	26	26	HINDAWI LTD	LONDON	OXID MED CELL LONGEV	JAN 5	2022	2022	10.1155/2022/2930310	http://dx.doi.org/10.1155/2022/2930310	Cell Biology	Science Citation Index Expanded (SCI-EXPANDED)	35035657	View Full Record in Web of Science
J	Liu, Yingjie; Luo, Gang; Tang, Quan; Song, Yang; Liu, Daxing; Wang, Hongjuan; Ma, Junliang	Methyltransferase-like 14 silencing relieves the development of atherosclerosis via m6A modification of p65 mRNA	BIOENGINEERED	English	Article	METTL14; atherosclerosis; aorta; m(6)A; p65	NF-KAPPA-B; INFLAMMATION; DYSFUNCTION; N6-METHYLADENOSINE; QUANTIFICATION; PROLIFERATION; AUTOPHAGY; INJURY; ROLES	To explore the METTL14-dependent m(6)A modification mechanism involved in the development of atherosclerosis. Oxidized low-density lipoprotein (ox-LDL) and the HUVEC cell line were used to establish an atherosclerosis cell model in vitro, and APOE (-/-) mice fed a high-fat diet were used as the animal model. Cell viability and apoptosis were assessed using MTT assays and flow cytometry. The statu…	[Liu, Yingjie; Luo, Gang; Tang, Quan; Song, Yang; Liu, Daxing] Affiliated Hosp Zunyi Med Univ, Dept Cardiac & Vasc Surg, 149 Dalian Rd, Zunyi, Guizhou, Peoples R China; [Wang, Hongjuan] Affiliated Hosp Zunyi Med Univ, Dept Sci Res, Zunyi, Guizhou, Peoples R China; [Ma, Junliang] Affiliated Hosp Zunyi Med Univ, Dept Thorac Surg, 149 Dalian Rd, Zunyi 563000, Guizhou, Peoples R China		Liu, YJ (corresponding author), Affiliated Hosp Zunyi Med Univ, Dept Cardiac & Vasc Surg, 149 Dalian Rd, Zunyi, Guizhou, Peoples R China.;Ma, JL (corresponding author), Affiliated Hosp Zunyi Med Univ, Dept Thorac Surg, 149 Dalian Rd, Zunyi 563000, Guizhou, Peoples R China.	122150@163.com; 913577076@qq.com	40	18	19	TAYLOR & FRANCIS INC	PHILADELPHIA	BIOENGINEERED	MAY 2	2022	13	10.1080/21655979.2022.2031409	http://dx.doi.org/10.1080/21655979.2022.2031409	Biotechnology & Applied Microbiology	Science Citation Index Expanded (SCI-EXPANDED)	35543357	View Full Record in Web of Science
J	Pan, Zhiqiang; Zhang, Qi; Liu, Xiaodan; Zhou, Huimin; Jin, Tong; Hao, Ling-Yun; Xie, Ling; Zhang, Ming; Yang, Xiao-Xiao; Sun, Meng-Lan; Xue, Zhou-Ya; Tao, Yang; Ye, Xin-Chun; Shen, Wen; Cao, Jun-Li	Methyltransferase-like 3 contributes to inflammatory pain by targeting TET1 in YTHDF2-dependent manner	PAIN	English	Article	Inflammatory pain; Mett13; Tet1; Ythdf2; Spinal dorsal horn	MESSENGER-RNA METHYLATION; NEUROPATHIC PAIN; FAT MASS; NOCICEPTIVE BEHAVIORS; NUCLEAR-RNA; M(6)A RNA; TRANSLATION; N-6-METHYLADENOSINE; MEMORY; HYDROXYMETHYLATION	The methyltransferase-like 3 (Mett13) is a key component of the large N6-adenosine-methyltransferase complex in mammalian responsible for RNA N6-methyladenosine (m(6)A) modification, which plays an important role in gene post-transcription modulation. Although RNA m(6)A is enriched in mammalian neurons, its regulatory function in nociceptive information processing remains elusive. Here, we report…	[Pan, Zhiqiang; Zhang, Qi; Liu, Xiaodan; Zhou, Huimin; Hao, Ling-Yun; Xie, Ling; Zhang, Ming; Yang, Xiao-Xiao; Sun, Meng-Lan; Xue, Zhou-Ya; Tao, Yang; Cao, Jun-Li] Xuzhou Med Univ, Jiangsu Prov Key Lab Anesthesia & Analgesia Appli, Jiangsu Prov Key Lab Anesthesiol, Xuzhou, Jiangsu, Peoples R China; [Jin, Tong] Tongji Univ, Shanghai Peoples Hosp 10, Dept Pain, Shanghai, Peoples R China; [Ye, Xin-C…	Xuzhou Medical University; Tongji University	Cao, JL (corresponding author), Xuzhou Med Univ, Jiangsu Prov Key Lab Anesthesiol, 209 Tongshan Rd, Xuzhou 221004, Jiangsu, Peoples R China.	caojl0310@aliyun.com	69	33	35	LIPPINCOTT WILLIAMS & WILKINS	PHILADELPHIA	PAIN	JUL	2021	162	10.1097/j.pain.0000000000002218	http://dx.doi.org/10.1097/j.pain.0000000000002218	Anesthesiology; Clinical Neurology; Neurosciences	Science Citation Index Expanded (SCI-EXPANDED)	34130310	View Full Record in Web of Science
J	He, Xiang; Zhang, Lei; Liu, Shengbin; Wang, Junyi; Liu, Yao; Xiong, Anying; Jiang, Manling; Luo, Li; Ying, Xiong; Li, Guoping	Methyltransferase-like 3 leads to lung injury by up-regulation of interleukin 24 through N6-methyladenosine-dependent mRNA stability and translation efficiency in mice exposed to fine particulate matter 2.5	ENVIRONMENTAL POLLUTION	English	Article	PM2; 5; METTL3; YTHDF1; IL24; Epigenetics; Lung injury	AIR-POLLUTION; M(6)A RNA; N-6-METHYLADENOSINE; INFLAMMATION; METHYLATION; DYSFUNCTION; BINDING; FAMILY; DAMAGE	Fine particulate matter 2.5 (PM2.5) exposure leads to the progress of pulmonary disease. It has been reported that N6-methyladenosine (m6A) modification was involved in various biological processes and diseases. However, the critical role of m6A modification in pulmonary disease during PM2.5 exposure remains elusive. Here, we revealed that lung inflammation and mucus production caused by PM2.5 we…	[He, Xiang; Zhang, Lei; Liu, Shengbin; Wang, Junyi; Liu, Yao; Xiong, Anying; Jiang, Manling; Luo, Li; Li, Guoping] Southwest Jiaotong Univ, Peoples Hosp Chengdu 3, Chengdu Inst Resp Hlth, Lab Allergy & Precis Med,Affiliated Hosp, Chengdu 610031, Peoples R China; [He, Xiang; Zhang, Lei; Liu, Shengbin; Wang, Junyi; Liu, Yao; Xiong, Anying; Jiang, Manling; Luo, Li; Li, Guoping] ChongQing Med Univ, N…	Southwest Jiaotong University; Chongqing Medical University	Li, GP (corresponding author), Southwest Jiaotong Univ, Peoples Hosp Chengdu 3, Chengdu Inst Resp Hlth, Lab Allergy & Precis Med,Affiliated Hosp, Chengdu 610031, Peoples R China.	liguoping@swjtu.edu.cn	41	22	23	ELSEVIER SCI LTD	OXFORD	ENVIRON POLLUT	SEP 1	2022	308	10.1016/j.envpol.2022.119607	http://dx.doi.org/10.1016/j.envpol.2022.119607	Environmental Sciences	Science Citation Index Expanded (SCI-EXPANDED)	35718042	View Full Record in Web of Science
J	Jian, Dongdong; Wang, Ying; Jian, Liguo; Tang, Hao; Rao, Lixin; Chen, Ke; Jia, Zhen; Zhang, Wanjun; Liu, Yiran; Chen, Xu; Shen, Xiwen; Gao, Chuanyu; Wang, Shuai; Li, Muwei	METTL14 aggravates endothelial inflammation and atherosclerosis by increasing FOXO1 N6-methyladeosine modifications	THERANOSTICS	English	Article	METTL14; m(6)A modification; endothelial inflammation; FOXO1; atherosclerosis	RNA MODIFICATIONS; CELL-ADHESION; M(6)A; EXPRESSION; RECRUITMENT; ANGIOGENESIS; METHYLATION; DYSFUNCTION	Aims: The N6-methyladenosine (m(6)A) modification plays an important role in various biological processes, but its role in atherosclerosis remains unknown. The aim of this study was to investigate the role and mechanism of m(6)A modification in endothelial cell inflammation and its influence on atherosclerosis development. Methods: We constructed a stable TNF-alpha-induced endothelial cell inflam…	[Jian, Dongdong; Wang, Ying; Rao, Lixin; Chen, Ke; Gao, Chuanyu; Li, Muwei] Zhengzhou Univ, Henan Key Lab Coronary Heart Dis Prevent & Contro, Henan Prov Peoples Hosp, Cent China Fuwai Hosp,Dept Cardiol, Zhengzhou 450003, Henan, Peoples R China; [Jian, Liguo] Zhengzhou Univ, Dept Cardiol, Affiliated Hosp 2, Zhengzhou 450003, Henan, Peoples R China; [Tang, Hao] Zhengzhou Univ, Key Lab Cardiac Rege…	Zhengzhou University; Zhengzhou University; Zhengzhou University; Zhengzhou University; Zhejiang University; Zhengzhou University; Zhengzhou University; Westlake University	Gao, CY; Li, MW (corresponding author), Zhengzhou Univ, Henan Key Lab Coronary Heart Dis Prevent & Contro, Henan Prov Peoples Hosp, Cent China Fuwai Hosp,Dept Cardiol, Zhengzhou 450003, Henan, Peoples R China.;Wang, S (corresponding author), Westlake Univ, Sch Life Sci, Hangzhou 310024, Zhejiang, Peoples R China.	gaocy1102@163.com; wangshuai@westlake.edu.cn; lmw0207@gs.zzu.edu.cn	50	160	176	IVYSPRING INT PUBL	LAKE HAVEN	THERANOSTICS		2020	10	10.7150/thno.45178	http://dx.doi.org/10.7150/thno.45178	Medicine, Research & Experimental	Science Citation Index Expanded (SCI-EXPANDED)	32802173	View Full Record in Web of Science
J	Lu, Zhihui; Liu, Hong; Song, Nana; Liang, Yiran; Zhu, Jiaming; Chen, Jing; Ning, Yichun; Hu, Jiachang; Fang, Yi; Teng, Jie; Zou, Jianzhou; Dai, Yan; Ding, Xiaoqiang	METTL14 aggravates podocyte injury and glomerulopathy progression through N6-methyladenosine-dependent downregulating of Sirt1	CELL DEATH & DISEASE	English	Article		ACUTE KIDNEY INJURY; NUCLEAR-RNA; AUTOPHAGY; M(6)A; PROTEINURIA; N6-METHYLADENOSINE; METHYLATION; PROTECT	Podocytes are known to play a determining role in the progression of proteinuric kidney disease. N-6-methyladenosine (m6A), as the most abundant chemical modification in eukaryotic mRNA, has been reported to participate in various pathological processes. However, its role in podocyte injury remains unclear. In this study, we observed the elevated m6A RNA levels and the most upregulated METTL14 ex…	[Lu, Zhihui; Liu, Hong; Song, Nana; Liang, Yiran; Zhu, Jiaming; Chen, Jing; Ning, Yichun; Hu, Jiachang; Fang, Yi; Teng, Jie; Zou, Jianzhou; Dai, Yan; Ding, Xiaoqiang] Fudan Univ, Zhongshan Hosp, Div Nephrol, Shanghai, Peoples R China; [Liu, Hong; Song, Nana; Zhu, Jiaming; Chen, Jing; Ning, Yichun; Hu, Jiachang; Fang, Yi; Teng, Jie; Zou, Jianzhou; Dai, Yan; Ding, Xiaoqiang] Shanghai Med Ctr Kidney…	Fudan University	Dai, Y; Ding, XQ (corresponding author), Fudan Univ, Zhongshan Hosp, Div Nephrol, Shanghai, Peoples R China.;Dai, Y; Ding, XQ (corresponding author), Shanghai Med Ctr Kidney, Shanghai, Peoples R China.;Dai, Y; Ding, XQ (corresponding author), Shanghai Inst Kidney & Dialysis, Shanghai, Peoples R China.;Dai, Y; Ding, XQ (corresponding author), Shanghai Key Lab Kidney & Blood Purificat, Shanghai, Pe…	dai.yan1@zs-hospital.sh.cn; dingxiaoqiang1965@126.com	47	66	71	SPRINGERNATURE	LONDON	CELL DEATH DIS	SEP 27	2021	12	10.1038/s41419-021-04156-y	http://dx.doi.org/10.1038/s41419-021-04156-y	Cell Biology	Science Citation Index Expanded (SCI-EXPANDED)	34580283	View Full Record in Web of Science
J	Liu, Jun; Luo, Guanzheng; Sun, Juan; Men, Lili; Ye, Honggang; He, Chuan; Ren, Decheng	METTL14 is essential for β-cell survival and insulin secretion	BIOCHIMICA ET BIOPHYSICA ACTA-MOLECULAR BASIS OF DISEASE	English	Article	METTL14; m(6)A; beta-Cells; Insulin secretion	MESSENGER-RNA; MOLECULAR REGULATION; ENDOCRINE PANCREAS; M(6)A; PDX1; DIFFERENTIATION; METHYLATION; PROTEIN; DEATH; DYSFUNCTION	Defects in the development, maintenance or expansion of beta-cell mass can result in impaired glucose metabolism and diabetes. N-6-methyladenosine affects mRNA stability and translation efficiency, and impacts cell differentiation and stress response. To determine if there is a role for m(6)A in beta-cells, we investigated the effect of Mettl14, a key component of the m(6)A methyltransferase comp…	[Sun, Juan; Ye, Honggang; Ren, Decheng] Univ Chicago, Dept Med, 5841 S Maryland Ave,MC 1027, Chicago, IL 60637 USA; [Liu, Jun; He, Chuan] Univ Chicago, Dept Chem, 5735 S Ellis Ave, Chicago, IL 60637 USA; [Luo, Guanzheng] Sun Yat Sen Univ, Sch Life Sci, Guangzhou 510275, Guangdong, Peoples R China; [Men, Lili] Dalian Med Univ, Dept Endocrinol, Affiliated Hosp 1, Dalian 116011, Peoples R China; [Re…	University of Chicago; University of Chicago; Sun Yat Sen University; Dalian Medical University; Eli Lilly	Ren, DC (corresponding author), Univ Chicago, Dept Med, 5841 S Maryland Ave,MC 1027, Chicago, IL 60637 USA.	ren_decheng@lilly.com	41	57	67	ELSEVIER	AMSTERDAM	BBA-MOL BASIS DIS	SEP 1	2019	1865	10.1016/j.bbadis.2019.04.011	http://dx.doi.org/10.1016/j.bbadis.2019.04.011	Biochemistry & Molecular Biology; Biophysics; Cell Biology	Science Citation Index Expanded (SCI-EXPANDED)	31029827	View Full Record in Web of Science
J	Li, Xuan'an; Xu, Xuezheng; Zhang, Qilei; Ling, Min; Tan, Xiaohua	METTL14 promotes fibroblast-like synoviocytes activation via the LASP1/SRC/ AKT axis in rheumatoid arthritis	AMERICAN JOURNAL OF PHYSIOLOGY-CELL PHYSIOLOGY	English	Article	fi broblast -like synoviocytes; LASP1; m6A methylation; METTL14; RA	CELLS	The objective of this study is to explore the specific roles of a crucial N6-methyladenosine (m6A) methyltransferase, methyltransferase-like 14 (METTL14), in fibroblast-like synoviocytes (FLSs) activation of rheumatoid arthritis (RA). RA rat model was induced by administering intraperitoneally collagen antibody alcohol. Primary fibroblast-like synoviocytes (FLSs) were isolated from joint synovium…	[Li, Xuan'an; Xu, Xuezheng] Cent South Univ, Hunan Canc Hosp, Xiangya Sch Med, Dept Orthopaed,Affiliated Canc Hosp, Changsha, Peoples R China; [Zhang, Qilei] Xiangya Med Sch CSU, Dept Anat & Neurobiol, Changsha, Peoples R China; [Ling, Min] Brain Hosp Hunan Prov, Neurosurg Dept, Changsha, Peoples R China; [Tan, Xiaohua] Cent South Univ, Morphol Ctr, Sch Basic Med Sci, Changsha, Peoples R China	Central South University; Central South University	Li, XA (corresponding author), Cent South Univ, Hunan Canc Hosp, Xiangya Sch Med, Dept Orthopaed,Affiliated Canc Hosp, Changsha, Peoples R China.;Tan, XH (corresponding author), Cent South Univ, Morphol Ctr, Sch Basic Med Sci, Changsha, Peoples R China.	lixianan2001@163.com; tanxiaohua@csu.edu.cn	40	7	7	AMER PHYSIOLOGICAL SOC	Rockville	AM J PHYSIOL-CELL PH	MAY	2023	324	10.1152/ajpcell.00575.2022	http://dx.doi.org/10.1152/ajpcell.00575.2022	Cell Biology; Physiology	Science Citation Index Expanded (SCI-EXPANDED)	36878846	View Full Record in Web of Science
J	Li, Manna; Deng, Le; Xu, Gaosi	METTL14 promotes glomerular endothelial cell injury and diabetic nephropathy via m6A modification of α-klotho	MOLECULAR MEDICINE	English	Article	Diabetic nephropathy; Glomerular endothelial cell injury; m6A; METTL14; alpha-Klotho	N-6-METHYLADENOSINE; METHYLATION; RNA; PROLIFERATION; EXPRESSION; FTO	Background: N6-Methyladenosine (m6A) modification has been implicated in many bioprocesses. However, its functions in diabetic nephropathy (DN) have not been determined. Here, we investigated the role of METTL14, a key component of the m6A methyltransferase complex, in DN. Methods: The expression of METTL14 was detected in DN patients and human renal glomerular endothelial cells (HRGECs). In vitr…	[Li, Manna; Deng, Le; Xu, Gaosi] Nanchang Univ, Dept Nephrol, Affiliated Hosp 2, 1 Minde Rd, Nanchang 330006, Jiangxi, Peoples R China	Nanchang University	Xu, GS (corresponding author), Nanchang Univ, Dept Nephrol, Affiliated Hosp 2, 1 Minde Rd, Nanchang 330006, Jiangxi, Peoples R China.	gaosi_xu@126.com	41	54	57	SPRINGER	NEW YORK	MOL MED	DEC	2021	27	10.1186/s10020-021-00365-5	http://dx.doi.org/10.1186/s10020-021-00365-5	Biochemistry & Molecular Biology; Cell Biology; Medicine, Research & Experimental	Science Citation Index Expanded (SCI-EXPANDED)	34503454	View Full Record in Web of Science
J	Liu, Yanzhuo; Yuan, Yinglin; Zhou, Zili; Jiang, Xiaomei; He, Shu; Wei, Fan; Cui, Yuanyuan; Yang, Lu; Zhao, Gaoping	Mettl14 sustains FOXP3 expression to promote the differentiation and functions of induced-regulatory T cells via the mTOR signaling pathway	IMMUNOLOGY LETTERS	English	Article	N6-methyladenosine; iTregs; Differential; Suppressive function; mTOR	TGF-BETA; GENERATION; TOLERANCE; RAPAMYCIN; CD4(+)	Induced regulatory T cell (iTregs) can be generated in vitro. Thus, iTregs-based therapeutics are receiving increased attention for their potential to treat autoimmune diseases and prevent transplant rejection. However, iTregs fail to maintain FoxP3 expression and suppressive activity, which limits their clinical application. Increasing lines of evidence suggest that methyltransferase-like 14 (ME…	[Liu, Yanzhuo; Yuan, Yinglin; Zhou, Zili; Jiang, Xiaomei; Wei, Fan; Cui, Yuanyuan; Zhao, Gaoping] Univ Elect Sci & Technol China, Sichuan Prov Peoples Hosp, Sch Med, Dept Gastrointestinal Surg, Chengdu 610072, Sichuan, Peoples R China; [Liu, Yanzhuo; Yuan, Yinglin; Jiang, Xiaomei; Cui, Yuanyuan; Zhao, Gaoping] Univ Elect Sci & Technol China, Sichuan Prov Peoples Hosp, Clin Immunol Translat Med Ke…	University of Electronic Science & Technology of China; Sichuan Provincial People's Hospital; Sichuan Provincial People's Hospital; University of Electronic Science & Technology of China; Sichuan Provincial People's Hospital; University of Electronic Science & Technology of China	Zhao, GP (corresponding author), Univ Elect Sci & Technol China, Sichuan Prov Peoples Hosp, Sch Med, Dept Gastrointestinal Surg, Chengdu 610072, Sichuan, Peoples R China.;Zhao, GP (corresponding author), Univ Elect Sci & Technol China, Sichuan Prov Peoples Hosp, Clin Immunol Translat Med Key Lab Sichuan Prov, Chengdu 610072, Sichuan, Peoples R China.;Yang, L (corresponding author), Univ Elect Sci…	lyang@uestc.edu.cn; gzhao@uestc.edu.cn	34	1	1	ELSEVIER	AMSTERDAM	IMMUNOL LETT	JUN	2023	258	10.1016/j.imlet.2023.04.008	http://dx.doi.org/10.1016/j.imlet.2023.04.008	Immunology	Science Citation Index Expanded (SCI-EXPANDED)	37121553	View Full Record in Web of Science
J	Tang, Jifeng; Yu, Ziqing; Xia, Jinfang; Jiang, Renquan; Chen, Shuhui; Ye, Detai; Sheng, Huiming; Lin, Jinpiao	METTL14-Mediated m6A Modification of TNFAIP3 Involved in Inflammation in Patients With Active Rheumatoid Arthritis	ARTHRITIS & RHEUMATOLOGY	English	Article		MESSENGER-RNA METHYLATION; NF-KAPPA-B; AMERICAN-COLLEGE; NUCLEAR-RNA; A20; DIFFERENTIATION; METHOTREXATE; PROTEINS; DAMAGE	Objective. The aim of the study was to investigate the role of N6-methyladenosine (m6A) modification in the progression of rheumatoid arthritis (RA).Methods. Peripheral blood mononuclear cells (PBMCs) from patients with RA and healthy controls were collected. The expression of m6A modification-related proteins and m6A levels were detected using polymerase chain reaction (PCR), western blot, and m…	[Tang, Jifeng; Sheng, Huiming; Lin, Jinpiao] Shanghai Jiao Tong Univ, Tongren Hosp, Dept Lab Med, Sch Med, Shanghai, Peoples R China; [Tang, Jifeng; Yu, Ziqing; Xia, Jinfang; Jiang, Renquan; Chen, Shuhui; Ye, Detai; Lin, Jinpiao] Fujian Med Univ, Dept Lab Med, Affiliated Hosp 1, Fuzhou, Peoples R China; [Yu, Ziqing] Fujian Canc Hosp, Dept Pathol, Fuzhou, Peoples R China; [Sheng, Huiming] Shanghai…	Shanghai Jiao Tong University; Fujian Medical University; Shanghai Jiao Tong University	Sheng, HM; Lin, JP (corresponding author), Shanghai Jiao Tong Univ, Tongren Hosp, Dept Lab Med, Sch Med, Shanghai, Peoples R China.;Lin, JP (corresponding author), Fujian Med Univ, Dept Lab Med, Affiliated Hosp 1, Fuzhou, Peoples R China.;Sheng, HM (corresponding author), Shanghai Jiao Tong Univ, Coll Hlth Sci & Technol, Sch Med, Fac Med Lab Sci, Shanghai, Peoples R China.	HMSHENG@shsmu.edu.cn; jinpiaolin@163.com	47	9	9	WILEY	HOBOKEN	ARTHRITIS RHEUMATOL	DEC	2023	75	10.1002/art.42629	http://dx.doi.org/10.1002/art.42629	Rheumatology	Science Citation Index Expanded (SCI-EXPANDED)	37327357	View Full Record in Web of Science
J	Tang, Jinhong; Zhao, Xiangyun; Wei, Wei; Liu, Weiwei; Fan, Huining; Liu, Xiu Ping; Li, Yungai; Wang, Long; Guo, Jinghui	METTL16-mediated translation of CIDEA promotes non-alcoholic fatty liver disease progression via m6A-dependent manner	PEERJ	English	Article	Non-alcoholic fatty liver disease; N6-methyladenosine (m6A); METTL16; CIDEA; m6A sequencing	LIPID-METABOLISM; EXPRESSION; N6-METHYLADENOSINE; METHYLATION; CANCER	Background: As the most prevalent chemical modifications on eukaryotic mRNAs, N6-methyladenosine (m6A) methylation was reported to participate in the regulation of various metabolic diseases. This study aimed to investigate the roles of m6A methylation and methyltransferase-like16 (METTL16) in non-alcoholic fatty liver disease (NAFLD). Methods: In this study, we used a model of diet-induced NAFLD…	[Tang, Jinhong; Wei, Wei; Liu, Weiwei; Fan, Huining; Wang, Long; Guo, Jinghui] Shanghai Jiao Tong Univ, Sch Med, Shanghai Peoples Hosp 6, Dept Gastroenterol, Shanghai, Peoples R China; [Tang, Jinhong] Fudan Univ, Minhang Hosp, Endoscopy Ctr, Shanghai, Peoples R China; [Zhao, Xiangyun] Shanghai Jiao Tong Univ, Sch Med, Shanghai Peoples Hosp 6, Digest Endoscop Ctr, Shanghai, Peoples R China; [Liu, …	Shanghai Jiao Tong University; Fudan University; Shanghai Jiao Tong University; Fudan University; Shanghai Jiao Tong University	Wang, L; Guo, JH (corresponding author), Shanghai Jiao Tong Univ, Sch Med, Shanghai Peoples Hosp 6, Dept Gastroenterol, Shanghai, Peoples R China.	dragonking1870@126.com; guohui19820623@126.com	42	12	13	PEERJ INC	LONDON	PEERJ	DEC 1	2022	10	10.7717/peerj.14379	http://dx.doi.org/10.7717/peerj.14379	Multidisciplinary Sciences	Science Citation Index Expanded (SCI-EXPANDED)	36518278	View Full Record in Web of Science
J	Li, Qian; Yu, Liwen; Gao, Amy; Ren, Ruiqing; Zhang, Jianlin; Cao, Lei; Wang, Xiaohong; Liu, Yapeng; Qi, Wenqian; Cai, Liangyu; Li, Wei; Wang, Weiwei; Guo, Xiaobin; Su, Guohai; Yu, Xiao; Zhang, Jie; Xi, Bo; Zhang, Yun; Zhang, Meng; Zhang, Cheng	METTL3 (Methyltransferase Like 3)-Dependent N6-Methyladenosine Modification on Braf mRNA Promotes Macrophage Inflammatory Response and Atherosclerosis in Mice	ARTERIOSCLEROSIS THROMBOSIS AND VASCULAR BIOLOGY	English	Article	atherosclerosis; ERK phosphorylation; inflammation; macrophage; methylation	KAPPA-B; PROLIFERATION; N-6-METHYLADENOSINE; CELLS	Background:Atherosclerosis is a chronic inflammatory disease, in which macrophages determine the progression of atherosclerotic plaques. However, no studies have investigated how METTL3 (methyltransferase like 3) in macrophages affects atherosclerotic plaque formation in vivo. Additionally, whether Braf mRNA is modified by METTL3-dependent N6-methyladenosine (m6A) methylation remains unknown. Met…	[Zhang, Meng; Zhang, Cheng] Shandong Univ, Qilu Hosp, Dept Cardiol, Jinan 250012, Shandong, Peoples R China; [Zhang, Meng; Zhang, Cheng] Shandong First Med Univ, Shandong Univ, Cent Hosp, Cardiovasc Dis Res Ctr, Jinan, Peoples R China; [Li, Qian; Yu, Liwen; Gao, Amy; Ren, Ruiqing; Zhang, Jianlin; Cao, Lei; Wang, Xiaohong; Liu, Yapeng; Qi, Wenqian; Cai, Liangyu; Li, Wei; Wang, Weiwei; Zhang, Jie; …	Shandong University; Shandong First Medical University & Shandong Academy of Medical Sciences; Shandong University; Shandong University; Shandong University; Chinese Academy of Medical Sciences - Peking Union Medical College; Shandong First Medical University & Shandong Academy of Medical Sciences; Shandong University; Shandong University	Zhang, M; Zhang, C (corresponding author), Shandong Univ, Qilu Hosp, Dept Cardiol, Jinan 250012, Shandong, Peoples R China.;Zhang, M; Zhang, C (corresponding author), Shandong First Med Univ, Shandong Univ, Cent Hosp, Cardiovasc Dis Res Ctr, Jinan, Peoples R China.	zhangmeng@sdu.edu.cn; zhangc@sdu.edu.cn	51	12	13	LIPPINCOTT WILLIAMS & WILKINS	PHILADELPHIA	ARTERIOSCL THROM VAS	MAY	2023	43	10.1161/ATVBAHA.122.318451	http://dx.doi.org/10.1161/ATVBAHA.122.318451	Hematology; Peripheral Vascular Disease	Science Citation Index Expanded (SCI-EXPANDED)	36951060	View Full Record in Web of Science
J	Li, Yuanpei; He, Xiaoniu; Lu, Xiao; Gong, Zhicheng; Li, Qing; Zhang, Lei; Yang, Ronghui; Wu, Chengyi; Huang, Jialiang; Ding, Jiancheng; He, Yaohui; Liu, Wen; Chen, Ceshi; Cao, Bin; Zhou, Dawang; Shi, Yufeng; Chen, Juxiang; Wang, Chuangui; Zhang, Shengping; Zhang, Jian; Ye, Jing; You, Han	METTL3 acetylation impedes cancer metastasis via fine-tuning its nuclear and cytosolic functions	NATURE COMMUNICATIONS	English	Article		MESSENGER-RNA METHYLATION; ACTIVATED PROTEIN-KINASE; HIGH-DOSE NICOTINAMIDE; BREAST-CANCER; ASPIRIN SUPPRESSES; M(6)A METHYLATION; N-6-METHYLADENOSINE; TRANSLATION; DIFFERENTIATION; INTERLEUKIN-6	METTL3 catalyzes mRNA m(6)A deposition. The authors identify an acetylation-mediated regulation of METTL3 subcellular localization and compartment-specific functions, a process that is fine-tuned by anti-inflammatory and pro-inflammatory signals, which ultimately determine breast cancer metastasis. The methyltransferase like 3 (METTL3) has been generally recognized as a nuclear protein bearing on…	[Li, Yuanpei; He, Xiaoniu; Lu, Xiao; Li, Qing; Zhang, Lei; Wu, Chengyi; Huang, Jialiang; Zhou, Dawang; You, Han] Xiamen Univ, Innovat Ctr Cell Signaling Network, Sch Life Sci, State Key Lab Cellular Stress Biol, Xiamen 361102, Peoples R China; [Gong, Zhicheng] Jiangnan Univ, Affiliated Hosp, Wuxi Canc Inst, Wuxi 214062, Jiangsu, Peoples R China; [Yang, Ronghui] Capital Med Univ, Dept Biochem & Mo…	Xiamen University; Jiangnan University; Capital Medical University; Xiamen University; Chinese Academy of Sciences; Kunming Institute of Zoology, CAS; Xiamen University; Tongji University; Naval Medical University; Shandong University of Technology; Shanghai Jiao Tong University; Air Force Military Medical University; Air Force Military Medical University; Air Force Military Medical University	You, H (corresponding author), Xiamen Univ, Innovat Ctr Cell Signaling Network, Sch Life Sci, State Key Lab Cellular Stress Biol, Xiamen 361102, Peoples R China.	hyou@xmu.edu.cn	74	33	37	NATURE PORTFOLIO	BERLIN	NAT COMMUN	OCT 26	2022	13	10.1038/s41467-022-34209-5	http://dx.doi.org/10.1038/s41467-022-34209-5	Multidisciplinary Sciences	Science Citation Index Expanded (SCI-EXPANDED)	36289222	View Full Record in Web of Science
J	Huang, Liwei; Tang, Hanfeng; Hu, Jianzhang	METTL3 Attenuates Inflammation in Fusarium solani-Induced Keratitis via the PI3K/AKT Signaling Pathway	INVESTIGATIVE OPHTHALMOLOGY & VISUAL SCIENCE	English	Article	fungal keratitis; N6-methyladenosine methylation; METTL3; PI3K/AKT signaling pathway	FUNGAL KERATITIS; EXPRESSION; CORNEA	PURPOSE. Our previous investigations revealed a significant role of methyltransferase-like 3 (METTL3)-mediated N6-methyladenosine (m(6)A) modification in the development of corneal inflammation in Fusarium infection, but the exact mechanism is unknown. Therefore, this research aimed to explore how METTL3 affects the inflammatory process of fungal keratitis (FK) in mice. METHODS. We established in…	[Huang, Liwei; Tang, Hanfeng; Hu, Jianzhang] Fujian Med Univ, Union Hosp, Dept Ophthalmol, Fuzhou, Peoples R China	Fujian Medical University	Hu, JZ (corresponding author), Fujian Med Univ, Union Hosp, Dept Ophthalmol, 29 Xinquan Rd, Fuzhou 350005, Peoples R China.	ophhjz@163.com	50	7	7	ASSOC RESEARCH VISION OPHTHALMOLOGY INC	ROCKVILLE	INVEST OPHTH VIS SCI	SEP	2022	63	10.1167/iovs.63.10.20	http://dx.doi.org/10.1167/iovs.63.10.20	Ophthalmology	Science Citation Index Expanded (SCI-EXPANDED)	36169946	View Full Record in Web of Science
J	Wang, Jinghua; Yan, Shushan; Lu, Hongying; Wang, Shufeng; Xu, Donghua	METTL3 Attenuates LPS-Induced Inflammatory Response in Macrophages via NF-κB Signaling Pathway	MEDIATORS OF INFLAMMATION	English	Article		RHEUMATOID-ARTHRITIS; METHYLATION; SUBUNIT	Methyltransferase-like 3 (METTL3), an RNA N-6-methyladenosine (m(6)A) methyltransferase, is essential for the m(6)A mRNA modification. As a key enzyme of m(6)A methylation modification, METTL3 has been implicated in immune and inflammation regulation. However, little is known of the role and underlying mechanism of METTL3 in rheumatoid arthritis (RA). The aim of the present study is to elucidate …	[Wang, Jinghua; Xu, Donghua] Weifang Med Univ, Clin Med Coll, Weifang 261000, Peoples R China; [Wang, Jinghua; Xu, Donghua] Weifang Med Univ, Affiliated Hosp, Dept Rheumatol, Weifang 261000, Peoples R China; [Yan, Shushan] Weifang Med Univ, Affiliated Hosp, Dept Gastrointestinal & Anal Dis Surg, Weifang 261000, Peoples R China; [Lu, Hongying] Weifang Med Univ, Clin Med Coll, Funct Lab, Weifang 26…	Shandong Second Medical University; Shandong Second Medical University; Shandong Second Medical University; Shandong Second Medical University; Shandong Second Medical University	Xu, DH (corresponding author), Weifang Med Univ, Clin Med Coll, Weifang 261000, Peoples R China.;Xu, DH (corresponding author), Weifang Med Univ, Affiliated Hosp, Dept Rheumatol, Weifang 261000, Peoples R China.;Yan, SS (corresponding author), Weifang Med Univ, Affiliated Hosp, Dept Gastrointestinal & Anal Dis Surg, Weifang 261000, Peoples R China.;Wang, SF (corresponding author), Weifang Med Uni…	jinghua163w@163.com; yanshushan@163.com; luhy1030@163.com; wfwangshufeng@163.com; flower322@163.com	36	147	161	HINDAWI LTD	LONDON	MEDIAT INFLAMM	OCT 24	2019	2019	10.1155/2019/3120391	http://dx.doi.org/10.1155/2019/3120391	Cell Biology; Immunology	Science Citation Index Expanded (SCI-EXPANDED)	31772500	View Full Record in Web of Science
J	Zong, Xin; Zhao, Jing; Wang, Hong; Lu, Zeqing; Wang, Fengqin; Du, Huahua; Wang, Yizhen	Mettl3 Deficiency Sustains Long-Chain Fatty Acid Absorption through Suppressing Traf6-Dependent Inflammation Response	JOURNAL OF IMMUNOLOGY	English	Article		BINDING PROTEINS; BACTERIAL RECOGNITION; CHYLOMICRON FORMATION; INTESTINAL BARRIER; NUCLEAR-RNA; CD36; TRANSPORT; INNATE; LIPOPOLYSACCHARIDE; METHYLATION	A better understanding of the molecular mechanism of intestinal fatty acid absorption could lead to novel approaches to treatment and prevention of fatty acid-related metabolic diseases. Although it is confirmed that absorption of long-chain fatty acids (LCFAs) decreases during the pathological processes, the genetic basis and molecular mechanisms remain largely unknown. N-6-methyladenosine (m(6)…	[Zong, Xin; Zhao, Jing; Wang, Hong; Lu, Zeqing; Wang, Fengqin; Du, Huahua; Wang, Yizhen] Zhejiang Univ, Coll Anim Sci, Hangzhou 310058, Zhejiang, Peoples R China; [Lu, Zeqing; Wang, Fengqin; Du, Huahua; Wang, Yizhen] Minist Agr, Key Lab Anim Nutr & Feed Sci Eastern China, Hangzhou 310058, Zhejiang, Peoples R China	Zhejiang University; Ministry of Agriculture & Rural Affairs	Wang, YZ (corresponding author), Zhejiang Univ, 866 Yuhangtang Rd, Hangzhou 310058, Zhejiang, Peoples R China.	yzwang321@zju.edu.cn	53	82	91	AMER ASSOC IMMUNOLOGISTS	BETHESDA	J IMMUNOL	JAN 15	2019	202	10.4049/jimmunol.1801151	http://dx.doi.org/10.4049/jimmunol.1801151	Immunology	Science Citation Index Expanded (SCI-EXPANDED)	30567729	View Full Record in Web of Science
J	Cheng, Da; Wu, Cichun; Li, Ying; Liu, Yao; Mo, Juan; Fu, Lei; Peng, Shifang	METTL3 inhibition ameliorates liver damage in mouse with hepatitis B virus-associated acute-on-chronic liver failure by regulating miR-146a-5p maturation	BIOCHIMICA ET BIOPHYSICA ACTA-GENE REGULATORY MECHANISMS	English	Article	METTL3; miR-146a-5p; Hepatitis B virus; Liver cell damage; Acute-on-chronic liver failure; m( 6) A methylation	N-6-METHYLADENOSINE	Hepatitis B virus (HBV)-associated acute-on-chronic liver failure (ACLF) is a clinical syndrome of severe liver damage. HBV infection is affected by N6-methyladenosine (m6A) RNA modification. Here, we investigated whether methyltransferase-like 3 (METTL3)-mediated m6A methylation can affect ACLF. Human hepatic cells (THLE-2) were treated with lipopolysaccharide (LPS) to induce cell damage. Prolif…	[Cheng, Da; Wu, Cichun; Li, Ying; Liu, Yao; Mo, Juan; Fu, Lei; Peng, Shifang] Cent South Univ, Xiangya Hosp, Dept Infect Dis, Hunan Key Lab Viral Hepatitis, 87 Xiangya Rd, Changsha 410008, Hunan, Peoples R China	Central South University	Fu, L; Peng, SF (corresponding author), Cent South Univ, Xiangya Hosp, Dept Infect Dis, Hunan Key Lab Viral Hepatitis, 87 Xiangya Rd, Changsha 410008, Hunan, Peoples R China.	fufu.lei@outlook.com; psfang_xy@sohu.com	33	10	10	ELSEVIER	AMSTERDAM	BBA-GENE REGUL MECH	APR	2022	1865	10.1016/j.bbagrm.2021.194782	http://dx.doi.org/10.1016/j.bbagrm.2021.194782	Biochemistry & Molecular Biology; Biophysics	Science Citation Index Expanded (SCI-EXPANDED)	34968770	View Full Record in Web of Science
J	He, Ying; Wang, Wei; Xu, Xiaoxiao; Yang, Beining; Yu, Xijie; Wu, Yanru; Wang, Jiawei	Mettl3 inhibits the apoptosis and autophagy of chondrocytes in inflammation through mediating Bcl2 stability via Ythdf1-mediated m6A modification	BONE	English	Article	Chondrocyte; Inflammation; Apoptosis; Autophagy; B-cell lymphoma 2; N-6-methyladenosine; Methyltransferase-like 3	MESSENGER-RNA; COMPLEX; PROTEINS; ALKBH5	N-6-methyladenosine (m(6)A) methylation is one of the most common internal modifications in eukaryotic messenger RNA occurring on N-6 nitrogen of adenosine. However, the roles of m(6)A in tempommandibular joint osteoarthritis (TMJ OA) are still elusive. Here, we investigate the function and mechanism of methyltransferaselike 3 (Mettl3) in chondrocytes in inflammation. We found that the expression…	[He, Ying; Xu, Xiaoxiao; Yang, Beining; Yu, Xijie; Wu, Yanru; Wang, Jiawei] Wuhan Univ, State Key Lab Breeding Base Basic Sci Stomatol Hu, Sch & Hosp Stomatol, Wuhan 430079, Hubei, Peoples R China; [He, Ying; Xu, Xiaoxiao; Yang, Beining; Yu, Xijie; Wu, Yanru; Wang, Jiawei] Wuhan Univ, Key Lab Oral Biomed, Minist Educ, Sch & Hosp Stomatol, Wuhan 430079, Hubei, Peoples R China; [Wang, Wei] Wuhan Un…	Wuhan University; Wuhan University; Wuhan University	Wang, JW (corresponding author), Wuhan Univ, State Key Lab Breeding Base Basic Sci Stomatol Hu, Sch & Hosp Stomatol, Wuhan 430079, Hubei, Peoples R China.;Wang, JW (corresponding author), Wuhan Univ, Key Lab Oral Biomed, Minist Educ, Sch & Hosp Stomatol, Wuhan 430079, Hubei, Peoples R China.	wb000238@whu.edu.cn	42	64	68	ELSEVIER SCIENCE INC	NEW YORK	BONE	JAN	2022	154	10.1016/j.bone.2021.110182	http://dx.doi.org/10.1016/j.bone.2021.110182	Endocrinology & Metabolism	Science Citation Index Expanded (SCI-EXPANDED)	34530171	View Full Record in Web of Science
J	Sang, Weilin; Xue, Song; Jiang, Yafei; Lu, Haiming; Zhu, Libo; Wang, Cong; Ma, Jinzhong	METTL3 involves the progression of osteoarthritis probably by affecting ECM degradation and regulating the inflammatory response	LIFE SCIENCES	English	Article	Osteoarthritis; Bioinformatics analysis; Quantitative RT-PCR; Western blot; Immunofluorescence	M(6)A; EXPRESSION; RNA; METALLOPROTEINASE; OVEREXPRESSION; METHYLATION	We aimed to identify RNA N6-methyladenosine methylation associated genes in osteoarthritis (OA), and to explore possible regulatory mechanisms of these RNA methylation associated genes. Bioinformatics analyses, including differential expression analysis, functional enrichment analysis, verification analysis, and box plot analysis, were conducted based on different datasets from OA and non-OA pati…	[Sang, Weilin; Xue, Song; Jiang, Yafei; Lu, Haiming; Zhu, Libo; Wang, Cong; Ma, Jinzhong] Shanghai Jiao Tong Univ, Shanghai Gen Hosp, Dept Orthoped, Sch Med, Ward 6B,650 Xinsongjiang Rd, Shanghai 301620, Peoples R China	Shanghai Jiao Tong University	Ma, JZ (corresponding author), Shanghai Jiao Tong Univ, Shanghai Gen Hosp, Dept Orthoped, Sch Med, Ward 6B,650 Xinsongjiang Rd, Shanghai 301620, Peoples R China.	Majinzhong007@163.com	38	48	50	PERGAMON-ELSEVIER SCIENCE LTD	OXFORD	LIFE SCI	AUG 1	2021	278	10.1016/j.lfs.2021.119528	http://dx.doi.org/10.1016/j.lfs.2021.119528	Medicine, Research & Experimental; Pharmacology & Pharmacy	Science Citation Index Expanded (SCI-EXPANDED)	33894271	View Full Record in Web of Science
J	Li, Xinzhi; Jiang, Yuze; Sun, Xu; Wu, Yongsen; Chen, Zheng	METTL3 is required for maintaining β-cell function	METABOLISM-CLINICAL AND EXPERIMENTAL	English	Article	Islet beta cells; METTL3; Insulin secretion; Hyperglycemia; m(6)A; Cell death	B-INDUCING KINASE; GLUCOSE-METABOLISM; GENE-EXPRESSION; INFLAMMATION; METHYLATION; INSULIN; SH2B1	N6-methyladenosine (m(6)A) mRNA methylation has been shown to regulate obesity and type 2 diabetes. However, whether METTL3, the key methyltransferase for m(6)A mRNA methylation, regulates beta-cell failure in diabetes has not been fully explored. Here, we show that METTL3 is downregulated under the inflammatory and oxidative stress conditions, and islet beta-cell-specific deletion of Mettl3 indu…	[Li, Xinzhi; Jiang, Yuze; Sun, Xu; Wu, Yongsen; Chen, Zheng] Harbin Inst Technol, Sch Life Sci & Technol, HIT Ctr Life Sci, Harbin 150001, Peoples R China	Harbin Institute of Technology	Chen, Z (corresponding author), Harbin Inst Technol, Sch Life Sci & Technol, HIT Ctr Life Sci, Harbin 150001, Peoples R China.	chenzheng@hit.edu.cn	16	52	58	W B SAUNDERS CO-ELSEVIER INC	PHILADELPHIA	METABOLISM	MAR	2021	116	10.1016/j.metabol.2021.154702	http://dx.doi.org/10.1016/j.metabol.2021.154702	Endocrinology & Metabolism	Science Citation Index Expanded (SCI-EXPANDED)	33417895	View Full Record in Web of Science
J	Kong, Yiping; Zhang, Yiwen; Cai, Yongjie; Li, Di; Yi, Baicheng; Xu, Qiong	METTL3 mediates osteoblast apoptosis by regulating endoplasmic reticulum stress during LPS-induced inflammation	CELLULAR SIGNALLING	English	Article	N6-methyladenosine; METTL3; apoptosis; osteoblast differentiation; ER stress; mRNA stability	UNFOLDED PROTEIN RESPONSE; ER STRESS; RNA; DIFFERENTIATION; M(6)A; CELLS	Osteoblast apoptosis is a prominent factor for disrupting skeletal homeostasis in multiple inflammatory bone diseases. METTL3, a key methyltransferase that catalyzes the N6-methyladenosine (m6A) modification of mRNA, has recently been shown to exert a critical role in osteogenic differentiation. However, the function of METTL3 in osteoblast apoptosis under inflammatory conditions remains elusive.…	[Kong, Yiping; Zhang, Yiwen; Cai, Yongjie; Li, Di; Xu, Qiong] Sun Yat Sen Univ, Hosp Stomatol, Guanghua Sch Stomatol, Guangdong Prov Key Lab Stomatol, Guangzhou 510055, Peoples R China; [Yi, Baicheng] Shenzhen Univ, Clin Med Acad, Dept Stomatol, Gen Hosp, Shenzhen 518055, Peoples R China	Sun Yat Sen University; Shenzhen University	Xu, Q (corresponding author), Sun Yat Sen Univ, Hosp Stomatol, Guanghua Sch Stomatol, Guangdong Prov Key Lab Stomatol, Guangzhou 510055, Peoples R China.	kongyp3@mail2.sysu.edu.cn; zhangyw53@mail2.sysu.edu.cn; caiyj23@mail2.sysu.edu.cn; lidi5@mail2.sysu.edu.cn; xqiong@mail.sysu.edu.cn	58	20	22	ELSEVIER SCIENCE INC	NEW YORK	CELL SIGNAL	JUL	2022	95	10.1016/j.cellsig.2022.110335	http://dx.doi.org/10.1016/j.cellsig.2022.110335	Cell Biology	Science Citation Index Expanded (SCI-EXPANDED)	35461899	View Full Record in Web of Science
J	Li, Guilan; Sun, Zhanbing; Deng, Weihua; Cheng, Shaoxiong; Liu, Xiuli; Liu, Jincheng; Tang, Xiaomin; Zhang, Zhaohui	METTL3 plays a crucial function in multiple biological processes	ACTA HISTOCHEMICA	English	Review	METTL3; m 6 A; Methyltransferase; Disease	METHYLTRANSFERASE METTL3; M(6)A MODIFICATION; MALIGNANT PROGRESSION; CELL-PROLIFERATION; MYELOID-LEUKEMIA; CANCER; PROMOTES; RNA; INFLAMMATION; METHYLATION	The N6-methyladenosine (m6A) refers to the methylation of the N6 position of adenosine of RNA adenine. The modification of m6A is one of the most abundant epigenetic modifications in eukaryotic mRNA and non-coding RNA and is controlled by methyltransferases and demethylases. The biological mechanism and significance of m6A have been discovered with the development of m6A sequencing. Various m6A c…	[Li, Guilan; Sun, Zhanbing; Deng, Weihua; Cheng, Shaoxiong; Liu, Xiuli; Liu, Jincheng; Tang, Xiaomin; Zhang, Zhaohui] Univ South China, Sch Publ Hlth, Hengyang Med Sch, Dept Prevent Med, Hengyang, Peoples R China; [Li, Guilan; Sun, Zhanbing; Deng, Weihua; Cheng, Shaoxiong; Liu, Xiuli; Liu, Jincheng; Tang, Xiaomin; Zhang, Zhaohui] Univ South China, Hengyang Med Sch, Hunan Prov Key Lab Typ Environm…	University of South China; University of South China; University of South China	Zhang, ZH (corresponding author), Univ South China, Sch Publ Hlth, Hengyang Med Sch, Dept Prevent Med, Hengyang, Peoples R China.;Zhang, ZH (corresponding author), Univ South China, Hengyang Med Sch, Hunan Prov Key Lab Typ Environm Pollut & Hlth Haza, Hengyang, Peoples R China.;Zhang, ZH (corresponding author), Univ South China, Sch Publ Hlth, Hengyang Med Sch, Hengyang, Peoples R China.	nhzzh@usc.edu.cn	76	3	4	ELSEVIER GMBH	MUNICH	ACTA HISTOCHEM	AUG	2022	124	10.1016/j.acthis.2022.151916	http://dx.doi.org/10.1016/j.acthis.2022.151916	Cell Biology	Science Citation Index Expanded (SCI-EXPANDED)	35752056	View Full Record in Web of Science
J	Liu, Shuiping; Zhuo, Lvjia; Wang, Jianjun; Zhang, Qin; Li, Qiujie; Li, Guohua; Yan, Lili; Jin, Ting; Pan, Ting; Sui, Xinbing; Lv, Qun; Xie, Tian	METTL3 plays multiple functions in biological processes	AMERICAN JOURNAL OF CANCER RESEARCH	English	Review	m(6)A modification; METTL3; biological process; diagnostic biomarker; cancer therapy	M(6)A METHYLTRANSFERASE; COREGULATOR ANCCA; MESSENGER-RNA; LUNG-CANCER; PROMOTES; PROLIFERATION; SUPPRESSES; CELLS; DIFFERENTIATION; TRANSLATION	N-6-methyladenosine (m(6)A) is the most common internal modification of mRNAs in higher eukaryotic. This process is performed by methyltransferase. Methyltransferase-like 3 (METTL3) is the best known m(6)A methyltransferase that functions in the reversible epi-transcriptome modulation of m(6)A modification. Besides acting as a m(6)A methyltransferase, METTL3 also regulates mRNA translation and ot…	[Liu, Shuiping; Zhuo, Lvjia; Wang, Jianjun; Zhang, Qin; Li, Qiujie; Li, Guohua; Yan, Lili; Jin, Ting; Pan, Ting; Sui, Xinbing; Lv, Qun; Xie, Tian] Hangzhou Normal Univ, Holist Integrat Pharm Inst, Sch Med, Dept Resp Med,Affiliated Hosp, Hangzhou 311121, Zhejiang, Peoples R China; [Liu, Shuiping; Zhuo, Lvjia; Zhang, Qin; Li, Qiujie; Li, Guohua; Yan, Lili; Jin, Ting; Pan, Ting; Sui, Xinbing; Lv, Qu…	Hangzhou Normal University; Hangzhou Normal University; Hangzhou Normal University; Hangzhou Normal University	Xie, T (corresponding author), Hangzhou Normal Univ, Sch Med, Holist Integrat Pharm Inst, Hangzhou 311121, Zhejiang, Peoples R China.;Lv, Q (corresponding author), Hangzhou Normal Univ, Sch Med, Affiliated Hosp, Dept Resp Med, Hangzhou 310015, Zhejiang, Peoples R China.;Sui, XB (corresponding author), Hangzhou Normal Univ, Sch Med, Hangzhou 311121, Zhejiang, Peoples R China.	hzzju@zju.edu.cn; hzlvqun@126.com; xbs@hznu.edu.cn	79	125	144	E-CENTURY PUBLISHING CORP	MADISON	AM J CANCER RES		2020	10			Oncology	Science Citation Index Expanded (SCI-EXPANDED)	32642280	View Full Record in Web of Science
J	Shi, Wen; Zheng, Yan; Luo, Shuai; Li, Xiaofeng; Zhang, Yilong; Meng, Xiaoming; Huang, Cheng; Li, Jun	METTL3 Promotes Activation and Inflammation of FLSs Through the NF-κB Signaling Pathway in Rheumatoid Arthritis	FRONTIERS IN MEDICINE	English	Article	rheumatoid arthritis; METTL3; FLSs; inflammatory response; proliferation; invasion; migration	FIBROBLAST-LIKE SYNOVIOCYTES; TRANSCRIPTION; TRANSLATION; EXPRESSION	Rheumatoid arthritis (RA), a common autoimmune disease, is extremely damaging to human health. Fibroblast-like synoviocytes (FLSs) have a vital role in the occurrence and development of RA. Methyltransferase-like 3 (METTL3), which is a crucial component of the N-6-methyladenosine (m(6)A) methyltransferase complex, is involved in the progression of many diseases. In this study, we explored the rol…	[Shi, Wen; Zheng, Yan; Luo, Shuai; Li, Xiaofeng; Zhang, Yilong; Meng, Xiaoming; Huang, Cheng; Li, Jun] Inflammat & Immune Mediated Dis Lab Anhui Prov, Hefei, Peoples R China; [Shi, Wen; Zheng, Yan; Luo, Shuai; Li, Xiaofeng; Zhang, Yilong; Meng, Xiaoming; Huang, Cheng; Li, Jun] Anhui Med Univ, Anhui Inst Innovat Drugs, Sch Pharm, Hefei, Peoples R China; [Shi, Wen; Zheng, Yan; Luo, Shuai; Li, Xiaof…	Anhui Medical University	Huang, C; Li, J (corresponding author), Inflammat & Immune Mediated Dis Lab Anhui Prov, Hefei, Peoples R China.;Huang, C; Li, J (corresponding author), Anhui Med Univ, Anhui Inst Innovat Drugs, Sch Pharm, Hefei, Peoples R China.;Huang, C; Li, J (corresponding author), Minist Educ, Key Lab Antiinflammatory & Immune Med, Hefei, Peoples R China.	huangcheng@ahmu.edu.cn; lj@ahmu.edu.cn	39	53	57	FRONTIERS MEDIA SA	LAUSANNE	FRONT MED-LAUSANNE	JUL 6	2021	8	10.3389/fmed.2021.607585	http://dx.doi.org/10.3389/fmed.2021.607585	Medicine, General & Internal	Science Citation Index Expanded (SCI-EXPANDED)	34295905	View Full Record in Web of Science
J	Liu, Qingbai; Li, Meng; Jiang, Lei; Jiang, Rui; Fu, Bin	METTL3 promotes experimental osteoarthritis development by regulating inflammatory response and apoptosis in chondrocyte	BIOCHEMICAL AND BIOPHYSICAL RESEARCH COMMUNICATIONS	English	Article	N6-methyladenosine (m6A); Chondrocytes; METTL3; NF-kappa B; Osteoarthritis	METHYLATION; PROGRESSION; CANCER	Objective: This study was to investigate the functional role of RNA methyltransferase METTL3, an enzyme catalyzes the formation of N6-methyladenosine (m6A) on the target mRNA, in the development of osteoarthritis (OA) and the underlying mechanism. Methods: Cytokine IL-1 beta was used to stimulate the chondroprogenitor cell line ATDC5 cells to mimic the inflammatory condition in vitro. The level o…	[Liu, Qingbai; Jiang, Lei; Jiang, Rui] Nan Jing Med Univ, Kangda Coll, Affiliated Lianshui Cty Peoples Hosp, Dept Orthopaed, Huaian 223400, Jiangsu, Peoples R China; [Li, Meng] Soochow Univ, Affiliated Hosp 1, Dept Orthopaed, Suzhou 215000, Jiangsu, Peoples R China; [Li, Meng] Soochow Univ, Med Coll, Orthoped Inst, Suzhou 215000, Jiangsu, Peoples R China; [Fu, Bin] Wujin Peoples Hosp, Dept Orthop…	Soochow University - China; Soochow University - China	Fu, B (corresponding author), Wujin Peoples Hosp, Dept Orthoped, 2 Yongning North Rd, Changzhou 213000, Jiangsu, Peoples R China.	fubin_happy@163.com	29	89	97	ACADEMIC PRESS INC ELSEVIER SCIENCE	SAN DIEGO	BIOCHEM BIOPH RES CO	AUG 13	2019	516	10.1016/j.bbrc.2019.05.168	http://dx.doi.org/10.1016/j.bbrc.2019.05.168	Biochemistry & Molecular Biology; Biophysics	Science Citation Index Expanded (SCI-EXPANDED)	31186141	View Full Record in Web of Science
J	Xu, Lili; Shi, Zhan; Pan, Zhaojun; Wu, Rong	METTL3 promotes hyperoxia-induced pyroptosis in neonatal bronchopulmonary dysplasia by inhibiting ATG8-mediated autophagy	CLINICS	English	Article	Bronchopulmonary Dysplasia; Neonatal; Genetics; N6-methyladenosine	INFLAMMATION	Objectives: N6-Methyladenosine (m6A) modification plays a vital role in lung disorders. However, the potential of m6A in neonatal Bronchopulmonary Dysplasia (BPD) has not been reported. This study aimed to investigate the roles of METTL3 in BPD.Methods: BPD models were established by hyperoxia in vivo and in vitro. Histological analysis was determined using HE staining. Gene expression was determ…	[Xu, Lili; Shi, Zhan; Pan, Zhaojun; Wu, Rong] Yangzhou Univ, Huaian Matern & Child Healthcare Hosp, Med Coll, Neonatal Med Ctr, Huaian, Peoples R China	Yangzhou University	Wu, R (corresponding author), Yangzhou Univ, Huaian Matern & Child Healthcare Hosp, Med Coll, Neonatal Med Ctr, Huaian, Peoples R China.	wr618@126.com	38	2	2	ELSEVIER ESPANA	MADRID	CLINICS	JAN-DEC	2023	78	10.1016/j.clinsp.2023.100253	http://dx.doi.org/10.1016/j.clinsp.2023.100253	Medicine, General & Internal	Science Citation Index Expanded (SCI-EXPANDED)	37478627	View Full Record in Web of Science
J	Xiao, Liang; Zhao, Quanlai; Hu, Bo; Wang, Jing; Liu, Chen; Xu, Hongguang	METTL3 promotes IL-1β-induced degeneration of endplate chondrocytes by driving m6A-dependent maturation of miR-126-5p	JOURNAL OF CELLULAR AND MOLECULAR MEDICINE	English	Article	degeneration; endplate chondrocytes; IL‐ 1β METTL3; miRNA	INTERVERTEBRAL DISC; N-6-METHYLADENOSINE M(6)A; RISK-FACTORS; RNA; STABILITY; ROLES	METTL3 is an important regulatory molecule in the process of RNA biosynthesis. It mainly regulates mRNA translation, alternative splicing and microRNA maturation by mediating m6A-dependent methylation. Interleukin 1 beta (IL-1 beta) is an important inducer of cartilage degeneration that can induce an inflammatory cascade reaction in chondrocytes and inhibit the normal biological function of cells…	[Xiao, Liang; Zhao, Quanlai; Hu, Bo; Wang, Jing; Liu, Chen; Xu, Hongguang] Yijishan Hosp, Affliated Hosp 1, Reseach Ctr Spine Surg,Key Lab Noncoding RNA Tran, Wannan Med Coll,Dept Spine Surg,Anhui Higher Educ, Wuhu, Peoples R China	Wannan Medical College	Xu, HG (corresponding author), Yijishan Hosp, Affiliated Hosp 1, Wannan Med Coll, Dept Spine Surg, 2 Zheshan West Rd, Wuhu 241001, Anhui, Peoples R China.	pumchxuhg@126.com	37	22	25	WILEY	HOBOKEN	J CELL MOL MED	DEC	2020	24	10.1111/jcmm.16012	http://dx.doi.org/10.1111/jcmm.16012	Cell Biology; Medicine, Research & Experimental	Science Citation Index Expanded (SCI-EXPANDED)	33098220	View Full Record in Web of Science
J	Li, Zhenwei; Xu, Qingqing; Huangfu, Ning; Chen, Xiaomin; Zhu, Jianhua	Mettl3 promotes oxLDL-mediated inflammation through activating STAT1 signaling	JOURNAL OF CLINICAL LABORATORY ANALYSIS	English	Article	atherosclerosis; inflammation; methyltransferase-like protein 3; N6-methyladenosine; signal transducer and activator of transcription 1	MESSENGER-RNA	Background Atherosclerosis (AS) is the main cause of cerebrovascular diseases, and macrophages act important roles during the AS pathological process through regulating inflammation. Modification of the novel N(6)-methyladenine (m6A) RNA is reported to be associated with AS, but its role in AS is largely unknown. The aim of this study was to investigate the role and mechanism of m6A modification …	[Li, Zhenwei; Zhu, Jianhua] Zhejiang Univ, Affiliated Hosp 1, Dept Cardiol, Sch Med, Hangzhou 310003, Peoples R China; [Li, Zhenwei; Huangfu, Ning; Chen, Xiaomin] Zhejiang Univ, Ningbo Hosp, Dept Cardiol, Ningbo, Peoples R China; [Xu, Qingqing] Ningbo First Hosp, Dept Nephrol, Ningbo 315000, Peoples R China	Zhejiang University; Zhejiang University; Ningbo University	Zhu, JH (corresponding author), Zhejiang Univ, Affiliated Hosp 1, Dept Cardiol, Sch Med, Hangzhou 310003, Peoples R China.;Chen, XM (corresponding author), Ningbo First Hosp, Dept Nephrol, Ningbo 315000, Peoples R China.	chxmin@hotmail.com; 1183039@zju.edu.cn	36	25	28	WILEY	HOBOKEN	J CLIN LAB ANAL	JAN	2022	36	10.1002/jcla.24019	http://dx.doi.org/10.1002/jcla.24019	Medical Laboratory Technology	Science Citation Index Expanded (SCI-EXPANDED)	34825733	View Full Record in Web of Science
J	Feng, Zhihui; Li, Qimeng; Meng, Runsha; Yi, Baicheng; Xu, Qiong	METTL3 regulates alternative splicing of MyD88 upon the lipopolysaccharide-induced inflammatory response in human dental pulp cells	JOURNAL OF CELLULAR AND MOLECULAR MEDICINE	English	Article	N6-methyladenosine; METTL3; alternative splicing; MyD88; lipopolysaccharide; dental pulp inflammation	NF-KAPPA-B; MESSENGER-RNA METHYLATION; PORPHYROMONAS-GINGIVALIS LIPOPOLYSACCHARIDE; NUCLEAR-RNA; N-6-METHYLADENOSINE; N6-METHYLADENOSINE; IDENTIFICATION; NUCLEOSIDES; INHIBITION; EXPRESSION	Dental pulp inflammation is a widespread public health problem caused by oral bacterial infections and can progress to pulp necrosis and periapical diseases. N6-methyladenosine (m6A) is a prevalent epitranscriptomic modification in mRNA. Previous studies have demonstrated that m6A methylation plays important roles in cell differentiation, embryonic development and stress responses. However, wheth…	[Feng, Zhihui; Li, Qimeng; Meng, Runsha; Yi, Baicheng; Xu, Qiong] Sun Yat Sen Univ, Guangdong Prov Key Lab Stomatol, Guanghua Sch Stomatol, Guangzhou, Guangdong, Peoples R China	Sun Yat Sen University	Xu, Q (corresponding author), Sun Yat Sen Univ, Guangdong Prov Key Lab Stomatol, Guanghua Sch Stomatol, Guangzhou, Guangdong, Peoples R China.	xqiong@mail.sysu.edu.cn	59	157	178	WILEY	HOBOKEN	J CELL MOL MED	MAY	2018	22	10.1111/jcmm.13491	http://dx.doi.org/10.1111/jcmm.13491	Cell Biology; Medicine, Research & Experimental	Science Citation Index Expanded (SCI-EXPANDED)	29502358	View Full Record in Web of Science
J	Zhang, Chenjing; Wang, Yin; Peng, Yunan; Xu, Hongjiao; Zhou, Xuelong	METTL3 regulates inflammatory pain by modulating m6A-dependent pri-miR-365-3p processing	FASEB JOURNAL	English	Article	central sensitization; inflammatory pain; METTL3; N-6-methyladenosine; spinal cord	RNA MODIFICATIONS; N-6-METHYLADENOSINE; M(6)A; GENE; HYPERSENSITIVITY; MECHANISMS; LANDSCAPE; MICRORNA; RAT; FTO	N-6-methyladenosine (m(6)A) modification in RNA has been implicated in diverse biological processes. However, very little is currently known about its role in nociceptive modulation. Here, we found that the level of spinal m(6)A modification was significantly increased in a mouse model of Complete Freund's Adjuvant (CFA)-induced chronic inflammatory pain, which was accompanied with the augmentati…	[Zhang, Chenjing] Zhejiang Prov Peoples Hosp, Dept Gastroenterol, Hangzhou, Peoples R China; [Wang, Yin] Taizhou Peoples Hosp, Dept Anesthesiol, Taizhou, Peoples R China; [Peng, Yunan] Nanjing Univ, Dept Anesthesiol, Affiliated Drum Tower Hosp, Sch Med, Nanjing, Peoples R China; [Xu, Hongjiao] Shanghai Transportat Univ, Peoples Hosp 1, Dept Anesthesiol, Shanghai, Peoples R China; [Zhou, Xuelong] …	Hangzhou Medical College; Zhejiang Provincial People's Hospital; Nanjing University; Shanghai Jiao Tong University; Nanjing Medical University	Zhou, XL (corresponding author), Nanjing Med Univ, Affiliated Hosp 1, Dept Anesthesiol, Nanjing 210029, Jiangsu, Peoples R China.	zhouxuelong0258@126.com	33	37	40	FEDERATION AMER SOC EXP BIOL	BETHESDA	FASEB J	JAN	2020	34	10.1096/fj.201901555R	http://dx.doi.org/10.1096/fj.201901555R	Biochemistry & Molecular Biology; Biology; Cell Biology	Science Citation Index Expanded (SCI-EXPANDED)	31914601	View Full Record in Web of Science
J	Barajas, Juan M.; Lin, Cho-Hao; Sun, Hui-Lung; Alencastro, Frances; Zhu, Allen C.; Aljuhani, Mona; Navari, Ladan; Yilmaz, Selen A.; Yu, Lianbo; Corps, Kara; He, Chuan; Duncan, Andrew W.; Ghoshal, Kalpana	METTL3 Regulates Liver Homeostasis, Hepatocyte Ploidy, and Circadian Rhythm-Controlled Gene Expression in Mice	AMERICAN JOURNAL OF PATHOLOGY	English	Article		ENRICHED TRANSCRIPTION FACTORS; MESSENGER-RNA; NUCLEAR-RNA; M(6)A; POLYPLOIDIZATION; DEMETHYLASE; METABOLISM; ALIGNMENT; READERS; WRITERS	N-6-methyladenosine (m(6)A), the most abundant internal modifier of mRNAs installed by the methyltransferase 13 (METTL3) at the (G/A)(m(6)A)C motif, plays a critical role in the regulation of gene expression. METTL3 is essential for embryonic development, and its dysregulation is linked to various diseases. However, the role of METTL3 in liver biology is largely unknown. In this study, METTL3 fun…	[Barajas, Juan M.; Lin, Cho-Hao; Aljuhani, Mona; Duncan, Andrew W.; Ghoshal, Kalpana] Ohio State Univ, Dept Pathol, Coll Med, Columbus, OH 43210 USA; [Yilmaz, Selen A.; Yu, Lianbo] Ohio State Univ, Dept Biomed Informat, Coll Med, Columbus, OH 43210 USA; [Corps, Kara] Ohio State Univ, Dept Vet Biosci, Coll Med, Columbus, OH 43210 USA; [Lin, Cho-Hao; Navari, Ladan; Ghoshal, Kalpana] Ohio State Univ…	University System of Ohio; Ohio State University; University System of Ohio; Ohio State University; University System of Ohio; Ohio State University; University System of Ohio; Ohio State University; James Cancer Hospital & Solove Research Institute; University of Chicago; Howard Hughes Medical Institute; Howard Hughes Medical Institute; University of Chicago; Pennsylvania Commonwealth System of …	Duncan, AW (corresponding author), Univ Pittsburgh, McGowan Inst, Dept Pathol, PLRC, 450 Technol Dr,Ste 300, Pittsburgh, PA 15219 USA.;Ghoshal, K (corresponding author), Ohio State Univ, Dept Pathol, 420 W 12th Ave, Columbus, OH 43210 USA.	duncana@pitt.edu; ghoshall@gmail.com	61	27	27	ELSEVIER SCIENCE INC	NEW YORK	AM J PATHOL	JAN	2022	192	10.1016/j.ajpath.2021.09.005	http://dx.doi.org/10.1016/j.ajpath.2021.09.005	Pathology	Science Citation Index Expanded (SCI-EXPANDED)	34599880	View Full Record in Web of Science
J	Cai, Yongjie; Yu, Ruiqing; Kong, Yiping; Feng, Zhihui; Xu, Qiong	METTL3 regulates LPS-induced inflammatory response via the NOD1 signaling pathway	CELLULAR SIGNALLING	English	Article	METTL3; NOD1 signaling pathway; Inflammation; mRNA degradation; Macrophage	MESSENGER-RNA; METHYLATION; M(6)A; N6-METHYLADENOSINE; WRITERS	N-6-methyladenosine (m(6)A) is a prevalent mRNA modification that plays a crucial function in multiple biological processes. Methyltransferase-like 3 (METTL3), an m(6)A methyltransferase, is essential for the m(6)A modification. Recently, the effect of METTL3 on the immune response has been reported. However, the effect is unclear, and the results are contradictory. In the present study, the tota…	[Cai, Yongjie; Yu, Ruiqing; Kong, Yiping; Feng, Zhihui; Xu, Qiong] Sun Yat sen Univ, Hosp Stomatol, Guanghua Sch Stomatol, Guangdong Prov Key Lab Stomatol, Guangzhou 510055, Peoples R China	Sun Yat Sen University	Xu, Q (corresponding author), Sun Yat sen Univ, Hosp Stomatol, Guanghua Sch Stomatol, Guangdong Prov Key Lab Stomatol, Guangzhou 510055, Peoples R China.	caiyj23@mail2.sysu.edu.cn; yuruiq@mail2.sysu.edu.cn; kongyp3@mail2.sysu.edu.cn; fengzhh8@mail.sysu.edu.cn; xqiong@mail.sysu.edu.cn	50	22	23	ELSEVIER SCIENCE INC	NEW YORK	CELL SIGNAL	MAY	2022	93	10.1016/j.cellsig.2022.110283	http://dx.doi.org/10.1016/j.cellsig.2022.110283	Cell Biology	Science Citation Index Expanded (SCI-EXPANDED)	35176453	View Full Record in Web of Science
J	Zhang, Yiwen; Gu, Xiaofei; Li, Di; Cai, Luhui; Xu, Qiong	METTL3 Regulates Osteoblast Differentiation and Inflammatory Response via Smad Signaling and MAPK Signaling	INTERNATIONAL JOURNAL OF MOLECULAR SCIENCES	English	Article	METTL3; osteoblast differentiation; inflammatory response; Smad; MAPK; mRNA stability; YTHDF2	MESSENGER-RNA METHYLATION; TGF-BETA; LIPOPOLYSACCHARIDE LPS; N-6-METHYLADENOSINE; TRANSLATION; EXPRESSION; N6-METHYLADENOSINE; LEUKEMIA	Osteoblasts are crucial bone-building cells that maintain bone homeostasis, whereas inflammatory stimuli can inhibit osteogenesis and activate inflammatory response. N6-methyladenosine (m(6)A) is the most abundant mRNA modification in eukaryotes and plays important roles in multiple biological processes. However, whether m(6)A modification affects osteoblast differentiation and inflammatory respo…	[Zhang, Yiwen; Gu, Xiaofei; Li, Di; Cai, Luhui; Xu, Qiong] Sun Yat Sen Univ, Guanghua Sch Stomatol, Guangzhou 510055, Peoples R China; [Zhang, Yiwen; Gu, Xiaofei; Li, Di; Cai, Luhui] Sun Yat Sen Univ, Guangdong Prov Key Lab Stomatol, Guangzhou 510055, Peoples R China	Sun Yat Sen University; Sun Yat Sen University	Xu, Q (corresponding author), Sun Yat Sen Univ, Guanghua Sch Stomatol, Guangzhou 510055, Peoples R China.	zhywen@foxmail.com; guxf3@mail2.sysu.edu.cn; lidi5@mail2.sysu.edu.cn; cailh6@mail2.sysu.edu.cn; xqiong@mail.sysu.edu.cn	51	111	124	MDPI	BASEL	INT J MOL SCI	JAN 1	2020	21	10.3390/ijms21010199	http://dx.doi.org/10.3390/ijms21010199	Biochemistry & Molecular Biology; Chemistry, Multidisciplinary	Science Citation Index Expanded (SCI-EXPANDED)	31892163	View Full Record in Web of Science
J	Li, Di; He, Jinlin; Fang, Caihong; Zhang, Yiwen; He, Mingli; Zhang, Zhanqi; Hou, Jinsong; Xu, Qiong	METTL3 Regulates Osteoclast Biological Behaviors via iNOS/NO-Mediated Mitochondrial Dysfunction in Inflammatory Conditions	INTERNATIONAL JOURNAL OF MOLECULAR SCIENCES	English	Article	osteoclast; lipopolysaccharide; m(6)A; mitochondrial function; inducible nitric oxide synthase (iNOS); nitric oxide (NO)	GENE-EXPRESSION; BONE-RESORPTION; NITRIC-OXIDE; DIFFERENTIATION	Excessive differentiation of osteoclasts contributes to the disruption of bone homeostasis in inflammatory bone diseases. Methyltransferase-like 3 (METTL3), the core methyltransferase that installs an N6-methyladenosine (m(6)A) modification on RNA, has been reported to participate in bone pathophysiology. However, whether METTL3-mediated m(6)A affects osteoclast differentiation in inflammatory co…	[Li, Di; He, Jinlin; Fang, Caihong; Zhang, Yiwen; He, Mingli; Zhang, Zhanqi; Hou, Jinsong; Xu, Qiong] Sun Yat Sen Univ, Hosp Stomatol, Guangzhou 510055, Peoples R China; [Li, Di; He, Jinlin; Fang, Caihong; Zhang, Yiwen; He, Mingli; Zhang, Zhanqi; Hou, Jinsong; Xu, Qiong] Guangdong Prov Key Lab Stomatol, Guangzhou 510055, Peoples R China; [Li, Di; He, Jinlin; Fang, Caihong; Zhang, Yiwen; He, Mingl…	Sun Yat Sen University; Sun Yat Sen University	Hou, JS; Xu, Q (corresponding author), Sun Yat Sen Univ, Hosp Stomatol, Guangzhou 510055, Peoples R China.;Hou, JS; Xu, Q (corresponding author), Guangdong Prov Key Lab Stomatol, Guangzhou 510055, Peoples R China.;Hou, JS; Xu, Q (corresponding author), Sun Yat Sen Univ, Guanghua Sch Stomatol, Guangzhou 510055, Peoples R China.	houjs@mail.sysu.edu.cn; xqiong@mail.sysu.edu.cn	57	4	5	MDPI	BASEL	INT J MOL SCI	JAN	2023	24	10.3390/ijms24021403	http://dx.doi.org/10.3390/ijms24021403	Biochemistry & Molecular Biology; Chemistry, Multidisciplinary	Science Citation Index Expanded (SCI-EXPANDED)	36674918	View Full Record in Web of Science
J	Zhang, Juanli; Yang, Jiaojiao; Gao, Xiaoli; Huang, Xiaoyu; Luo, Ruirui; Yang, Qiaoli; Yan, Zunqiang; Wang, Pengfei; Wang, Wei; Xie, Kaihui; Li, Jie; Zhang, Bo; Gun, Shuangbao	METTL3 Regulates the Inflammatory Response in CPB2 Toxin-Exposed IPEC-J2 Cells through the TLR2/NF-κB Signaling Pathway	INTERNATIONAL JOURNAL OF MOLECULAR SCIENCES	English	Article	METTL3; CPB2 toxin; IPEC-J2; inflammatory response; TLR2/NF-kappa B	CLOSTRIDIUM-PERFRINGENS; BETA2 TOXIN; NUCLEAR-RNA; RECEPTORS; N6-METHYLADENOSINE; INVOLVEMENT	Clostridium perfringens beta2 (CPB2) toxin is one of the main pathogenic toxins produced by Clostridium perfringens, which causes intestinal diseases in animals and humans. The N6-methyladenosine (m6A) modification is the most common reversible modification in eukaryotic disease processes. Methyltransferase-like 3 (METTL3) regulates immunity and inflammatory responses induced by the bacterial inf…	[Zhang, Juanli; Yang, Jiaojiao; Gao, Xiaoli; Huang, Xiaoyu; Yang, Qiaoli; Yan, Zunqiang; Wang, Pengfei; Xie, Kaihui; Li, Jie; Gun, Shuangbao] Gansu Agr Univ, Coll Anim Sci & Technol, Lanzhou 730070, Peoples R China; [Luo, Ruirui; Zhang, Bo] Gansu Acad Agr Sci, CAAS, Lanzhou 730070, Peoples R China; [Wang, Wei] Northwest A&F Univ, Coll Anim Sci & Technol, Xian 712100, Peoples R China; [Gun, Shuang…	Gansu Agricultural University; Gansu Academy of Agricultural Sciences; Chinese Academy of Agricultural Sciences; Northwest A&F University - China	Gun, S (corresponding author), Gansu Agr Univ, Coll Anim Sci & Technol, Lanzhou 730070, Peoples R China.;Gun, S (corresponding author), Gansu Res Ctr Swine Prod Engn & Technol, Lanzhou 730070, Peoples R China.	gunsbao056@126.com	56	4	5	MDPI	BASEL	INT J MOL SCI	DEC	2022	23	10.3390/ijms232415833	http://dx.doi.org/10.3390/ijms232415833	Biochemistry & Molecular Biology; Chemistry, Multidisciplinary	Science Citation Index Expanded (SCI-EXPANDED)	36555481	View Full Record in Web of Science
J	Li, Na; Hui, Hui; Bray, Bill; Gonzalez, Gwendolyn Michelle; Zeller, Mark; Anderson, Kristian G.; Knight, Rob; Smith, Davey; Wang, Yinsheng; Carlin, Aaron F.; Rana, Tariq M.	METTL3 regulates viral m6A RNA modification and host cell innate immune responses during SARS-CoV-2 infection	CELL REPORTS	English	Article		RIG-I; PATTERN-RECOGNITION; N-6-METHYLADENOSINE; EXPRESSION; RECEPTORS; DYNAMICS; VIRUSES	It is urgent and important to understand the relationship of the widespread severe acute respiratory syndrome coronavirus clade 2 (SARS-CoV-2) with host immune response and study the underlining molecular mechanism. N-6-methylation of adenosine (m6A) in RNA regulates many physiological and disease processes. Here, we investigate m6A modification of the SARS-CoV-2 gene in regulating the host cell …	[Li, Na; Hui, Hui; Bray, Bill; Rana, Tariq M.] Univ Calif San Diego, Inst Genom Med, Div Genet, Program Immunol, 9500 Gilman Dr MC 0762, La Jolla, CA 92093 USA; [Li, Na; Hui, Hui; Bray, Bill; Knight, Rob; Rana, Tariq M.] Univ Calif San Diego, Dept Pediat, 9500 Gilman Dr MC 0762, La Jolla, CA 92093 USA; [Hui, Hui] Univ Calif San Diego, Bioinformat Program, 9500 Gilman Dr, La Jolla, CA 92093 USA; […	University of California System; University of California San Diego; University of California System; University of California San Diego; University of California System; University of California San Diego; University of California System; University of California San Diego; University of California System; University of California San Diego; University of California System; University of Califor…	Rana, TM (corresponding author), Univ Calif San Diego, Inst Genom Med, Div Genet, Program Immunol, 9500 Gilman Dr MC 0762, La Jolla, CA 92093 USA.;Rana, TM (corresponding author), Univ Calif San Diego, Dept Pediat, 9500 Gilman Dr MC 0762, La Jolla, CA 92093 USA.	trana@ucsd.edu	54	137	150	CELL PRESS	CAMBRIDGE	CELL REP	MAY 11	2021	35	10.1016/j.celrep.2021.109091	http://dx.doi.org/10.1016/j.celrep.2021.109091	Cell Biology	Science Citation Index Expanded (SCI-EXPANDED)	33961823	View Full Record in Web of Science
J	Wang, Yilong; Yang, Zeyong	METTL3 relieved the injury of SH-SY5Y cells treated with lipopolysaccharide and exposed to sevoflurane through regulating the m6A levels of Sox2	BRAIN AND BEHAVIOR	English	Article	METTL3; postoperative cognitive dysfunction; sevoflurane; Sox2	POSTOPERATIVE COGNITIVE DYSFUNCTION; Y-BOX 2; EXPRESSION; DEMETHYLASE; ALKBH5	IntroductionPostoperative cognitive dysfunction (POCD) is a common complication of the central nervous system in elderly patients. The objective of this study was to investigate the role of methyltransferase 3 (METTL3) in the POCD progression. MethodsThe SH-SY5Y cells were treated with lipopolysaccharide (LPS) and exposed to sevoflurane to establish a POCD cell model. The cell viability and proli…	[Wang, Yilong; Yang, Zeyong] Shanghai Jiao Tong Univ, Int Peace Matern & Child Hlth Hosp, Sch Med, Dept Anesthesiol, Shanghai, Peoples R China; [Wang, Yilong; Yang, Zeyong] Shanghai Key Lab Embryo Original Dis, Shanghai, Peoples R China; [Wang, Yilong; Yang, Zeyong] Shanghai Municipal Key Clin Specialty, Shanghai, Peoples R China; [Yang, Zeyong] Shanghai Jiao Tong Univ, Int Peace Matern & Child H…	Shanghai Jiao Tong University; Shanghai Jiao Tong University	Yang, ZY (corresponding author), Shanghai Jiao Tong Univ, Int Peace Matern & Child Hlth Hosp, Sch Med, Dept Anesthesiol, Shanghai 200030, Peoples R China.	yangzeyong@sjtu.edu.cn	33	2	2	WILEY	HOBOKEN	BRAIN BEHAV	MAY	2023	13	10.1002/brb3.2936	http://dx.doi.org/10.1002/brb3.2936	Behavioral Sciences; Neurosciences	Science Citation Index Expanded (SCI-EXPANDED)	36977205	View Full Record in Web of Science
J	Liu, Erpeng; Lv, Lei; Zhan, Yonghao; Ma, Yuan; Feng, Jinjin; He, Yulin; Wen, Yibo; Zhang, Yanping; Pu, Qingsong; Ji, Fengping; Yang, Xinghuan; Wen, Jian Guo	METTL3/N6-methyladenosine/ miR-21-5p promotes obstructive renal fibrosis by regulating inflammation through SPRY1/ERK/NF-κB pathway activation	JOURNAL OF CELLULAR AND MOLECULAR MEDICINE	English	Article	METTL3; miR-21-5p; N6-methyladenosine (m(6)A); renal fibrosis; Spry1; ERK; NF-kappa B; urinary tract obstruction	INTERSTITIAL FIBROSIS; MESSENGER-RNA; PROTEINS; M(6)A; MICRORNAS	Renal fibrosis induced by urinary tract obstruction is a common clinical occurrence; however, effective treatment is lacking, and a deeper understanding of the mechanism of renal fibrosis is needed. Previous studies have revealed that miR-21 impacts liver and lung fibrosis progression by activating the SPRY1/ERK/NF-kB signalling pathway. However, whether miR-21 mediates obstructive renal fibrosis…	[Liu, Erpeng; Lv, Lei; Zhan, Yonghao; Ma, Yuan; Feng, Jinjin; He, Yulin; Wen, Yibo; Zhang, Yanping; Pu, Qingsong; Ji, Fengping; Yang, Xinghuan; Wen, Jian Guo] Zhengzhou Univ, Dept Urol, Affiliated Hosp 1, Zhengzhou, Peoples R China; [Liu, Erpeng; Lv, Lei; Ma, Yuan; Zhang, Yanping; Pu, Qingsong; Ji, Fengping; Yang, Xinghuan; Wen, Jian Guo] Zhengzhou Univ, Urodynam Ctr, Affiliated Hosp 1, Zhengzhou…	Zhengzhou University; Zhengzhou University; Zhengzhou University	Wen, JG (corresponding author), 1 Jianshe East Rd, Zhengzhou 450052, Peoples R China.	wenjianguo2020@126.com	45	53	60	WILEY	HOBOKEN	J CELL MOL MED	AUG	2021	25	10.1111/jcmm.16603	http://dx.doi.org/10.1111/jcmm.16603	Cell Biology; Medicine, Research & Experimental	Science Citation Index Expanded (SCI-EXPANDED)	34164910	View Full Record in Web of Science
[truncated: 184 more rows]
