# Supplementary material for: N6-methyladenosine (m6A) modification in inflammation: a bibliometric analysis and literature review
Source: PeerJ. 2024 Dec 13;12:e18645. doi: 10.7717/peerj.18645 (PMC11648684; doi:10.7717/peerj.18645)
Supplement: Supplemental Information 7 [file peerj-12-18645-s007.xlsx]

## Sheet: PubMed
PMID	Title	Authors	Citation	First Author	Journal/Book	Publication Year	Create Date	PMCID	DOI
36467585	N(1)-methyladenosine modification in cancer biology: Current status and future perspectives	Li J, Zhang H, Wang H.	Comput Struct Biotechnol J. 2022 Nov 25;20:6578-6585. doi: 10.1016/j.csbj.2022.11.045. eCollection 2022.	Li J	Comput Struct Biotechnol J	2022	2022-12-05	PMC9712505	10.1016/j.csbj.2022.11.045
36138023	RNA modifications: importance in immune cell biology and related diseases	Cui L, Ma R, Cai J, Guo C, Chen Z, Yao L, Wang Y, Fan R, Wang X, Shi Y.	Signal Transduct Target Ther. 2022 Sep 22;7(1):334. doi: 10.1038/s41392-022-01175-9.	Cui L	Signal Transduct Target Ther	2022	2022-09-22	PMC9499983	10.1038/s41392-022-01175-9
35417191	Inhibition of METTL3 attenuates renal injury and inflammation by alleviating TAB3 m6A modifications via IGF2BP2-dependent mechanisms	Wang JN, Wang F, Ke J, Li Z, Xu CH, Yang Q, Chen X, He XY, He Y, Suo XG, Li C, Yu JT, Jiang L, Ni WJ, Jin J, Liu MM, Shao W, Yang C, Gong Q, Chen HY, Li J, Wu YG, Meng XM.	Sci Transl Med. 2022 Apr 13;14(640):eabk2709. doi: 10.1126/scitranslmed.abk2709. Epub 2022 Apr 13.	Wang JN	Sci Transl Med	2022	2022-04-13		10.1126/scitranslmed.abk2709
34968454	N6-Methyladenosine Reader YTHDF1 Promotes ARHGEF2 Translation and RhoA Signaling in Colorectal Cancer	Wang S, Gao S, Zeng Y, Zhu L, Mo Y, Wong CC, Bao Y, Su P, Zhai J, Wang L, Soares F, Xu X, Chen H, Hezaveh K, Ci X, He A, McGaha T, O'Brien C, Rottapel R, Kang W, Wu J, Zheng G, Cai Z, Yu J, He HH.	Gastroenterology. 2022 Apr;162(4):1183-1196. doi: 10.1053/j.gastro.2021.12.269. Epub 2021 Dec 28.	Wang S	Gastroenterology	2022	2021-12-30		10.1053/j.gastro.2021.12.269
35406663	Emerging Roles and Mechanism of m6A Methylation in Cardiometabolic Diseases	Xu Z, Lv B, Qin Y, Zhang B.	Cells. 2022 Mar 24;11(7):1101. doi: 10.3390/cells11071101.	Xu Z	Cells	2022	2022-04-12	PMC8997388	10.3390/cells11071101
35333576	m(6)A mRNA modification maintains colonic epithelial cell homeostasis via NF-κB-mediated antiapoptotic pathway	Zhang T, Ding C, Chen H, Zhao J, Chen Z, Chen B, Mao K, Hao Y, Roulis M, Xu H, Kluger Y, Zou Q, Ye Y, Zhan M, Flavell RA, Li HB.	Sci Adv. 2022 Mar 25;8(12):eabl5723. doi: 10.1126/sciadv.abl5723. Epub 2022 Mar 25.	Zhang T	Sci Adv	2022	2022-03-25	PMC8956260	10.1126/sciadv.abl5723
34995800	METTL3-mediated m(6)A modification of TIMP2 mRNA promotes podocyte injury in diabetic nephropathy	Jiang L, Liu X, Hu X, Gao L, Zeng H, Wang X, Huang Y, Zhu W, Wang J, Wen J, Meng X, Wu Y.	Mol Ther. 2022 Apr 6;30(4):1721-1740. doi: 10.1016/j.ymthe.2022.01.002. Epub 2022 Jan 4.	Jiang L	Mol Ther	2022	2022-01-07	PMC9077313	10.1016/j.ymthe.2022.01.002
34371001	Enterotoxigenic Bacteroidesfragilis Promotes Intestinal Inflammation and Malignancy by Inhibiting Exosome-Packaged miR-149-3p	Cao Y, Wang Z, Yan Y, Ji L, He J, Xuan B, Shen C, Ma Y, Jiang S, Ma D, Tong T, Zhang X, Gao Z, Zhu X, Fang JY, Chen H, Hong J.	Gastroenterology. 2021 Nov;161(5):1552-1566.e12. doi: 10.1053/j.gastro.2021.08.003. Epub 2021 Aug 8.	Cao Y	Gastroenterology	2021	2021-08-09		10.1053/j.gastro.2021.08.003
36864027	N(6)-methyladenosine of Spi2a attenuates inflammation and sepsis-associated myocardial dysfunction in mice	Wang X, Ding Y, Li R, Zhang R, Ge X, Gao R, Wang M, Huang Y, Zhang F, Zhao B, Liao W, Du J.	Nat Commun. 2023 Mar 2;14(1):1185. doi: 10.1038/s41467-023-36865-7.	Wang X	Nat Commun	2023	2023-03-02	PMC9979126	10.1038/s41467-023-36865-7
36920907	METTL3-mediated m6A mRNA methylation regulates neutrophil activation through targeting TLR4 signaling	Luo S, Liao C, Zhang L, Ling C, Zhang X, Xie P, Su G, Chen Z, Zhang L, Lai T, Tang J.	Cell Rep. 2023 Mar 28;42(3):112259. doi: 10.1016/j.celrep.2023.112259. Epub 2023 Mar 14.	Luo S	Cell Rep	2023	2023-03-15		10.1016/j.celrep.2023.112259
34706873	METTL3-mediated m(6)A modification of ATG7 regulates autophagy-GATA4 axis to promote cellular senescence and osteoarthritis progression	Chen X, Gong W, Shao X, Shi T, Zhang L, Dong J, Shi Y, Shen S, Qin J, Jiang Q, Guo B.	Ann Rheum Dis. 2022 Jan;81(1):87-99. doi: 10.1136/annrheumdis-2021-221091. Epub 2021 Oct 27.	Chen X	Ann Rheum Dis	2022	2021-10-28		10.1136/annrheumdis-2021-221091
35656115	MiR-29a-3p Improves Acute Lung Injury by Reducing Alveolar Epithelial Cell PANoptosis	Cui Y, Wang X, Lin F, Li W, Zhao Y, Zhu F, Yang H, Rao M, Li Y, Liang H, Dai M, Liu B, Chen L, Han D, Lu R, Peng W, Zhang Y, Song C, Luo Y, Pan P.	Aging Dis. 2022 Jun 1;13(3):899-909. doi: 10.14336/AD.2021.1023. eCollection 2022 Jun.	Cui Y	Aging Dis	2022	2022-06-03	PMC9116916	10.14336/AD.2021.1023
33579825	METTL3-dependent N(6)-methyladenosine RNA modification mediates the atherogenic inflammatory cascades in vascular endothelium	Chien CS, Li JY, Chien Y, Wang ML, Yarmishyn AA, Tsai PH, Juan CC, Nguyen P, Cheng HM, Huo TI, Chiou SH, Chien S.	Proc Natl Acad Sci U S A. 2021 Feb 16;118(7):e2025070118. doi: 10.1073/pnas.2025070118.	Chien CS	Proc Natl Acad Sci U S A	2021	2021-02-13	PMC7896299	10.1073/pnas.2025070118
36951060	METTL3 (Methyltransferase Like 3)-Dependent N6-Methyladenosine Modification on Braf mRNA Promotes Macrophage Inflammatory Response and Atherosclerosis in Mice	Li Q, Yu L, Gao A, Ren R, Zhang J, Cao L, Wang X, Liu Y, Qi W, Cai L, Li W, Wang W, Guo X, Su G, Yu X, Zhang J, Xi B, Zhang Y, Zhang M, Zhang C.	Arterioscler Thromb Vasc Biol. 2023 May;43(5):755-773. doi: 10.1161/ATVBAHA.122.318451. Epub 2023 Mar 23.	Li Q	Arterioscler Thromb Vasc Biol	2023	2023-03-23		10.1161/ATVBAHA.122.318451
35761192	WTAP-mediated N(6)-methyladenosine modification of NLRP3 mRNA in kidney injury of diabetic nephropathy	Lan J, Xu B, Shi X, Pan Q, Tao Q.	Cell Mol Biol Lett. 2022 Jun 27;27(1):51. doi: 10.1186/s11658-022-00350-8.	Lan J	Cell Mol Biol Lett	2022	2022-06-27	PMC9235192	10.1186/s11658-022-00350-8
32802173	METTL14 aggravates endothelial inflammation and atherosclerosis by increasing FOXO1 N6-methyladeosine modifications	Jian D, Wang Y, Jian L, Tang H, Rao L, Chen K, Jia Z, Zhang W, Liu Y, Chen X, Shen X, Gao C, Wang S, Li M.	Theranostics. 2020 Jul 11;10(20):8939-8956. doi: 10.7150/thno.45178. eCollection 2020.	Jian D	Theranostics	2020	2020-08-18	PMC7415798	10.7150/thno.45178
37781923	FTO fuels diabetes-induced vascular endothelial dysfunction associated with inflammation by erasing m6A methylation of TNIP1	Zhou C, She X, Gu C, Hu Y, Ma M, Qiu Q, Sun T, Xu X, Chen H, Zheng Z.	J Clin Invest. 2023 Oct 2;133(19):e160517. doi: 10.1172/JCI160517.	Zhou C	J Clin Invest	2023	2023-10-02	PMC10541204	10.1172/JCI160517
34580283	METTL14 aggravates podocyte injury and glomerulopathy progression through N(6)-methyladenosine-dependent downregulating of Sirt1	Lu Z, Liu H, Song N, Liang Y, Zhu J, Chen J, Ning Y, Hu J, Fang Y, Teng J, Zou J, Dai Y, Ding X.	Cell Death Dis. 2021 Sep 27;12(10):881. doi: 10.1038/s41419-021-04156-y.	Lu Z	Cell Death Dis	2021	2021-09-28	PMC8476597	10.1038/s41419-021-04156-y
37957139	RNA m(6)A methylation modulates airway inflammation in allergic asthma via PTX3-dependent macrophage homeostasis	Han X, Liu L, Huang S, Xiao W, Gao Y, Zhou W, Zhang C, Zheng H, Yang L, Xie X, Liang Q, Tu Z, Yu H, Fu J, Wang L, Zhang X, Qian L, Zhou Y.	Nat Commun. 2023 Nov 13;14(1):7328. doi: 10.1038/s41467-023-43219-w.	Han X	Nat Commun	2023	2023-11-13	PMC10643624	10.1038/s41467-023-43219-w
37671161	Emerging role of METTL3 in inflammatory diseases: mechanisms and therapeutic applications	Song B, Zeng Y, Cao Y, Zhang J, Xu C, Pan Y, Zhao X, Liu J.	Front Immunol. 2023 Aug 21;14:1221609. doi: 10.3389/fimmu.2023.1221609. eCollection 2023.	Song B	Front Immunol	2023	2023-09-06	PMC10475571	10.3389/fimmu.2023.1221609
31365297	The N(6)-methyladenosine (m(6)A)-forming enzyme METTL3 facilitates M1 macrophage polarization through the methylation of STAT1 mRNA	Liu Y, Liu Z, Tang H, Shen Y, Gong Z, Xie N, Zhang X, Wang W, Kong W, Zhou Y, Fu Y.	Am J Physiol Cell Physiol. 2019 Oct 1;317(4):C762-C775. doi: 10.1152/ajpcell.00212.2019. Epub 2019 Jul 31.	Liu Y	Am J Physiol Cell Physiol	2019	2019-08-01		10.1152/ajpcell.00212.2019
34953789	Hsa_circ_0004287 inhibits macrophage-mediated inflammation in an N(6)-methyladenosine-dependent manner in atopic dermatitis and psoriasis	Yang L, Fu J, Han X, Zhang C, Xia L, Zhu R, Huang S, Xiao W, Yu H, Gao Y, Liang Q, Li W, Zhou Y.	J Allergy Clin Immunol. 2022 Jun;149(6):2021-2033. doi: 10.1016/j.jaci.2021.11.024. Epub 2021 Dec 23.	Yang L	J Allergy Clin Immunol	2022	2021-12-26		10.1016/j.jaci.2021.11.024
30824325	CCR7 Chemokine Receptor-Inducible lnc-Dpf3 Restrains Dendritic Cell Migration by Inhibiting HIF-1α-Mediated Glycolysis	Liu J, Zhang X, Chen K, Cheng Y, Liu S, Xia M, Chen Y, Zhu H, Li Z, Cao X.	Immunity. 2019 Mar 19;50(3):600-615.e15. doi: 10.1016/j.immuni.2019.01.021. Epub 2019 Feb 26.	Liu J	Immunity	2019	2019-03-03		10.1016/j.immuni.2019.01.021
37771377	Role of histone lactylation interference RNA m(6)A modification and immune microenvironment homeostasis in pulmonary arterial hypertension	Zhao SS, Liu J, Wu QC, Zhou XL.	Front Cell Dev Biol. 2023 Sep 12;11:1268646. doi: 10.3389/fcell.2023.1268646. eCollection 2023.	Zhao SS	Front Cell Dev Biol	2023	2023-09-29	PMC10522917	10.3389/fcell.2023.1268646
38065069	SON is an essential m(6)A target for hematopoietic stem cell fate	Luo H, Cortés-López M, Tam CL, Xiao M, Wakiro I, Chu KL, Pierson A, Chan M, Chang K, Yang X, Fecko D, Han G, Ahn EE, Morris QD, Landau DA, Kharas MG.	Cell Stem Cell. 2023 Dec 7;30(12):1658-1673.e10. doi: 10.1016/j.stem.2023.11.006.	Luo H	Cell Stem Cell	2023	2023-12-08	PMC10752439	10.1016/j.stem.2023.11.006
36859428	Inhibition of ALKBH5 attenuates I/R-induced renal injury in male mice by promoting Ccl28 m6A modification and increasing Treg recruitment	Chen J, Xu C, Yang K, Gao R, Cao Y, Liang L, Chen S, Xu S, Rong R, Wang J, Zhu T.	Nat Commun. 2023 Mar 1;14(1):1161. doi: 10.1038/s41467-023-36747-y.	Chen J	Nat Commun	2023	2023-03-01	PMC9977869	10.1038/s41467-023-36747-y
35764614	m(6)A demethylase ALKBH5 is required for antibacterial innate defense by intrinsic motivation of neutrophil migration	Liu Y, Song R, Zhao L, Lu Z, Li Y, Zhan X, Lu F, Yang J, Niu Y, Cao X.	Signal Transduct Target Ther. 2022 Jun 29;7(1):194. doi: 10.1038/s41392-022-01020-z.	Liu Y	Signal Transduct Target Ther	2022	2022-06-28	PMC9240034	10.1038/s41392-022-01020-z
35444654	Pan-Cancer Analysis Shows That ALKBH5 Is a Potential Prognostic and Immunotherapeutic Biomarker for Multiple Cancer Types Including Gliomas	Wei C, Wang B, Peng D, Zhang X, Li Z, Luo L, He Y, Liang H, Du X, Li S, Zhang S, Zhang Z, Han L, Zhang J.	Front Immunol. 2022 Apr 4;13:849592. doi: 10.3389/fimmu.2022.849592. eCollection 2022.	Wei C	Front Immunol	2022	2022-04-21	PMC9013910	10.3389/fimmu.2022.849592
32164750	m(6)A regulator-mediated methylation modification patterns and tumor microenvironment infiltration characterization in gastric cancer	Zhang B, Wu Q, Li B, Wang D, Wang L, Zhou YL.	Mol Cancer. 2020 Mar 12;19(1):53. doi: 10.1186/s12943-020-01170-0.	Zhang B	Mol Cancer	2020	2020-03-14	PMC7066851	10.1186/s12943-020-01170-0
34258163	The m6A Reader IGF2BP2 Regulates Macrophage Phenotypic Activation and Inflammatory Diseases by Stabilizing TSC1 and PPARγ	Wang X, Ji Y, Feng P, Liu R, Li G, Zheng J, Xue Y, Wei Y, Ji C, Chen D, Li J.	Adv Sci (Weinh). 2021 May 3;8(13):2100209. doi: 10.1002/advs.202100209. eCollection 2021 Jul.	Wang X	Adv Sci (Weinh)	2021	2021-07-14	PMC8261491	10.1002/advs.202100209
34503454	METTL14 promotes glomerular endothelial cell injury and diabetic nephropathy via m6A modification of α-klotho	Li M, Deng L, Xu G.	Mol Med. 2021 Sep 9;27(1):106. doi: 10.1186/s10020-021-00365-5.	Li M	Mol Med	2021	2021-09-10	PMC8427885	10.1186/s10020-021-00365-5
37788092	USP47 inhibits m6A-dependent c-Myc translation to maintain regulatory T cell metabolic and functional homeostasis	Wang A, Huang H, Shi JH, Yu X, Ding R, Zhang Y, Han Q, Ni ZY, Li X, Zhao R, Zou Q.	J Clin Invest. 2023 Dec 1;133(23):e169365. doi: 10.1172/JCI169365.	Wang A	J Clin Invest	2023	2023-10-03	PMC10688989	10.1172/JCI169365
37321527	FTO alleviates cerebral ischemia/reperfusion-induced neuroinflammation by decreasing cGAS mRNA stability in an m6A-dependent manner	Yu Z, Zheng L, Geng Y, Zhang Y, Wang Y, You G, Cai M, Li M, Cheng X, Zan J.	Cell Signal. 2023 Sep;109:110751. doi: 10.1016/j.cellsig.2023.110751. Epub 2023 Jun 14.	Yu Z	Cell Signal	2023	2023-06-15		10.1016/j.cellsig.2023.110751
36632449	Inhibition of IGF2BP1 attenuates renal injury and inflammation by alleviating m6A modifications and E2F1/MIF pathway	Mao Y, Jiang F, Xu XJ, Zhou LB, Jin R, Zhuang LL, Juan CX, Zhou GP.	Int J Biol Sci. 2023 Jan 1;19(2):593-609. doi: 10.7150/ijbs.78348. eCollection 2023.	Mao Y	Int J Biol Sci	2023	2023-01-12	PMC9830505	10.7150/ijbs.78348
34508078	TNF-α-mediated m(6)A modification of ELMO1 triggers directional migration of mesenchymal stem cell in ankylosing spondylitis	Xie Z, Yu W, Zheng G, Li J, Cen S, Ye G, Li Z, Liu W, Li M, Lin J, Su Z, Che Y, Ye F, Wang P, Wu Y, Shen H.	Nat Commun. 2021 Sep 10;12(1):5373. doi: 10.1038/s41467-021-25710-4.	Xie Z	Nat Commun	2021	2021-09-11	PMC8433149	10.1038/s41467-021-25710-4
37179374	Short-chain fatty acid-butyric acid ameliorates granulosa cells inflammation through regulating METTL3-mediated N6-methyladenosine modification of FOSL2 in polycystic ovarian syndrome	Liu K, He X, Huang J, Yu S, Cui M, Gao M, Liu L, Qian Y, Xie Y, Hui M, Hong Y, Nie X.	Clin Epigenetics. 2023 May 13;15(1):86. doi: 10.1186/s13148-023-01487-9.	Liu K	Clin Epigenetics	2023	2023-05-13	PMC10183145	10.1186/s13148-023-01487-9
36801705	Ythdf2 promotes pulmonary hypertension by suppressing Hmox1-dependent anti-inflammatory and antioxidant function in alveolar macrophages	Hu L, Yu Y, Shen Y, Huang H, Lin D, Wang K, Yu Y, Li K, Cao Y, Wang Q, Sun X, Qiu Z, Wei D, Shen B, Chen J, Fulton D, Ji Y, Wang J, Chen F.	Redox Biol. 2023 May;61:102638. doi: 10.1016/j.redox.2023.102638. Epub 2023 Feb 15.	Hu L	Redox Biol	2023	2023-02-21	PMC9975317	10.1016/j.redox.2023.102638
37486903	Noncanonical contribution of microglial transcription factor NR4A1 to post-stroke recovery through TNF mRNA destabilization	Liu P, Chen Y, Zhang Z, Yuan Z, Sun JG, Xia S, Cao X, Chen J, Zhang CJ, Chen Y, Zhan H, Jin Y, Bao X, Gu Y, Zhang M, Xu Y.	PLoS Biol. 2023 Jul 24;21(7):e3002199. doi: 10.1371/journal.pbio.3002199. eCollection 2023 Jul.	Liu P	PLoS Biol	2023	2023-07-24	PMC10365314	10.1371/journal.pbio.3002199
37679886	METTL3-mediated m(6) A modification of circPRKAR1B promotes Crohn's colitis by inducing pyroptosis via autophagy inhibition	Zhao J, Zhao Z, Ying P, Zhou Y, Xu Z, Wang H, Tang L.	Clin Transl Med. 2023 Sep;13(9):e1405. doi: 10.1002/ctm2.1405.	Zhao J	Clin Transl Med	2023	2023-09-08	PMC10485333	10.1002/ctm2.1405
34335245	Total Flavones of Abelmoschus manihot Ameliorates Podocyte Pyroptosis and Injury in High Glucose Conditions by Targeting METTL3-Dependent m(6)A Modification-Mediated NLRP3-Inflammasome Activation and PTEN/PI3K/Akt Signaling	Liu BH, Tu Y, Ni GX, Yan J, Yue L, Li ZL, Wu JJ, Cao YT, Wan ZY, Sun W, Wan YG.	Front Pharmacol. 2021 Jul 15;12:667644. doi: 10.3389/fphar.2021.667644. eCollection 2021.	Liu BH	Front Pharmacol	2021	2021-08-02	PMC8319635	10.3389/fphar.2021.667644
36302751	Senescent neutrophils-derived exosomal piRNA-17560 promotes chemoresistance and EMT of breast cancer via FTO-mediated m6A demethylation	Ou B, Liu Y, Gao Z, Xu J, Yan Y, Li Y, Zhang J.	Cell Death Dis. 2022 Oct 27;13(10):905. doi: 10.1038/s41419-022-05317-3.	Ou B	Cell Death Dis	2022	2022-10-27	PMC9613690	10.1038/s41419-022-05317-3
36813093	m(6)A methylation-induced NR1D1 ablation disrupts the HSC circadian clock and promotes hepatic fibrosis	Chen L, Xia S, Wang F, Zhou Y, Wang S, Yang T, Li Y, Xu M, Zhou Y, Kong D, Zhang Z, Shao J, Xu X, Zhang F, Zheng S.	Pharmacol Res. 2023 Mar;189:106704. doi: 10.1016/j.phrs.2023.106704. Epub 2023 Feb 20.	Chen L	Pharmacol Res	2023	2023-02-22		10.1016/j.phrs.2023.106704
36578520	The Role of N(6)-Methyladenosine in Inflammatory Diseases	Xu H, Lin C, Yang J, Chen X, Chen Y, Chen J, Guo A, Hu C.	Oxid Med Cell Longev. 2022 Dec 12;2022:9744771. doi: 10.1155/2022/9744771. eCollection 2022.	Xu H	Oxid Med Cell Longev	2022	2022-12-29	PMC9792239	10.1155/2022/9744771
35842714	Extracellular vesicles derived from human umbilical cord mesenchymal stem cells alleviate osteoarthritis of the knee in mice model by interacting with METTL3 to reduce m6A of NLRP3 in macrophage	Zhou H, Shen X, Yan C, Xiong W, Ma Z, Tan Z, Wang J, Li Y, Liu J, Duan A, Liu F.	Stem Cell Res Ther. 2022 Jul 16;13(1):322. doi: 10.1186/s13287-022-03005-9.	Zhou H	Stem Cell Res Ther	2022	2022-07-16	PMC9288728	10.1186/s13287-022-03005-9
36466802	The emerging roles of N(6)-methyladenosine in osteoarthritis	Liu H, Zheng YL, Wang XQ.	Front Mol Neurosci. 2022 Nov 10;15:1040699. doi: 10.3389/fnmol.2022.1040699. eCollection 2022.	Liu H	Front Mol Neurosci	2022	2022-12-05	PMC9710225	10.3389/fnmol.2022.1040699
37334368	Abrine, an IDO1 inhibitor, suppresses the immune escape and enhances the immunotherapy of anti-PD-1 antibody in hepatocellular carcinoma	Liang X, Gao H, Xiao J, Han S, He J, Yuan R, Yang S, Yao C.	Front Immunol. 2023 May 24;14:1185985. doi: 10.3389/fimmu.2023.1185985. eCollection 2023.	Liang X	Front Immunol	2023	2023-06-19	PMC10272936	10.3389/fimmu.2023.1185985
37069041	The structure and function of YTHDF epitranscriptomic m(6)A readers	Sikorski V, Selberg S, Lalowski M, Karelson M, Kankuri E.	Trends Pharmacol Sci. 2023 Jun;44(6):335-353. doi: 10.1016/j.tips.2023.03.004. Epub 2023 Apr 15.	Sikorski V	Trends Pharmacol Sci	2023	2023-04-17		10.1016/j.tips.2023.03.004
35342948	N6-methyladenosine modification participates in neoplastic immunoregulation and tumorigenesis	Zhao W, Li J, Ma Q, Cai J, Li A, Wu W, Lv Y, Cai M.	J Cell Physiol. 2022 Jul;237(7):2729-2739. doi: 10.1002/jcp.30730. Epub 2022 Mar 27.	Zhao W	J Cell Physiol	2022	2022-03-28		10.1002/jcp.30730
37345898	YTHDF2/m(6) A/NF-κB axis controls anti-tumor immunity by regulating intratumoral Tregs	Zhang L, Dou X, Zheng Z, Ye C, Lu TX, Liang HL, Wang L, Weichselbaum RR, He C.	EMBO J. 2023 Aug 1;42(15):e113126. doi: 10.15252/embj.2022113126. Epub 2023 Jun 22.	Zhang L	EMBO J	2023	2023-06-22	PMC10390869	10.15252/embj.2022113126
36149809	Immune dysregulation and RNA N6-methyladenosine modification in sepsis	Chen H, Zhang X, Su H, Zeng J, Chan H, Li Q, Liu X, Zhang L, Wu WKK, Chan MTV, Chen H.	Wiley Interdiscip Rev RNA. 2023 May-Jun;14(3):e1764. doi: 10.1002/wrna.1764. Epub 2022 Sep 23.	Chen H	Wiley Interdiscip Rev RNA	2023	2022-09-23		10.1002/wrna.1764
36642058	Suppression of YTHDF2 attenuates autoimmune hepatitis by expansion of myeloid-derived suppressor cells	Lyu Z, Huang B, Zhang J, Qian Q, Pu X, Cui N, Ou Y, Li B, You Z, Lian M, Tang R, Chen W, Zhao Z, Hou J, Gershwin ME, Zhang H, Xia Q, Ma X.	J Autoimmun. 2023 Feb;135:102993. doi: 10.1016/j.jaut.2023.102993. Epub 2023 Jan 13.	Lyu Z	J Autoimmun	2023	2023-01-15		10.1016/j.jaut.2023.102993
37903470	N6-Methyladenosine (m6A) Modification in Natural Immune Cell-Mediated Inflammatory Diseases	Teng Y, Yi J, Chen J, Yang L.	J Innate Immun. 2023;15(1):804-821. doi: 10.1159/000534162. Epub 2023 Oct 30.	Teng Y	J Innate Immun	2023	2023-10-30	PMC10673353	10.1159/000534162
38114747	The RNA m(6)A demethylase ALKBH5 drives emergency granulopoiesis and neutrophil mobilization by upregulating G-CSFR expression	Liu Y, Song R, Lu Z, Zhao L, Zhan X, Li Y, Cao X.	Cell Mol Immunol. 2024 Jan;21(1):6-18. doi: 10.1038/s41423-023-01115-9. Epub 2023 Dec 20.	Liu Y	Cell Mol Immunol	2024	2023-12-19	PMC10757716	10.1038/s41423-023-01115-9
37327357	METTL14-Mediated m6A Modification of TNFAIP3 Involved in Inflammation in Patients With Active Rheumatoid Arthritis	Tang J, Yu Z, Xia J, Jiang R, Chen S, Ye D, Sheng H, Lin J.	Arthritis Rheumatol. 2023 Dec;75(12):2116-2129. doi: 10.1002/art.42629. Epub 2023 Sep 28.	Tang J	Arthritis Rheumatol	2023	2023-06-16		10.1002/art.42629
34562602	Epigenetic regulation in fibrosis progress	Xue T, Qiu X, Liu H, Gan C, Tan Z, Xie Y, Wang Y, Ye T.	Pharmacol Res. 2021 Nov;173:105910. doi: 10.1016/j.phrs.2021.105910. Epub 2021 Sep 22.	Xue T	Pharmacol Res	2021	2021-09-25		10.1016/j.phrs.2021.105910
34150765	N6-Methyladenosine RNA Modification in Inflammation: Roles, Mechanisms, and Applications	Luo J, Xu T, Sun K.	Front Cell Dev Biol. 2021 Jun 4;9:670711. doi: 10.3389/fcell.2021.670711. eCollection 2021.	Luo J	Front Cell Dev Biol	2021	2021-06-21	PMC8213350	10.3389/fcell.2021.670711
37474299	Exploring the role of m6A modification in the great obstetrical syndromes	Ning J, Yan J, Yang H.	J Matern Fetal Neonatal Med. 2023 Dec;36(2):2234541. doi: 10.1080/14767058.2023.2234541.	Ning J	J Matern Fetal Neonatal Med	2023	2023-07-20		10.1080/14767058.2023.2234541
35990887	Regulation of N6-methyladenosine (m6A) RNA methylation in microglia-mediated inflammation and ischemic stroke	Zhang F, Ran Y, Tahir M, Li Z, Wang J, Chen X.	Front Cell Neurosci. 2022 Aug 4;16:955222. doi: 10.3389/fncel.2022.955222. eCollection 2022.	Zhang F	Front Cell Neurosci	2022	2022-08-22	PMC9386152	10.3389/fncel.2022.955222
37737134	Interaction between N(6)-methyladenosine modification and the tumor microenvironment in colorectal cancer	Yao J, Song Y, Yu X, Lin Z.	Mol Med. 2023 Sep 22;29(1):129. doi: 10.1186/s10020-023-00726-2.	Yao J	Mol Med	2023	2023-09-22	PMC10515252	10.1186/s10020-023-00726-2
37151887	Crosstalk between N6-methyladenosine (m6A) modification and noncoding RNA in tumor microenvironment	Wang D, Han Y, Peng L, Huang T, He X, Wang J, Ou C.	Int J Biol Sci. 2023 Apr 17;19(7):2198-2219. doi: 10.7150/ijbs.79651. eCollection 2023.	Wang D	Int J Biol Sci	2023	2023-05-08	PMC10158024	10.7150/ijbs.79651
37467831	N(6)-methyladenosine-modified circIRF2, identified by YTHDF2, suppresses liver fibrosis via facilitating FOXO3 nuclear translocation	Chen X, Zhu S, Li HD, Wang JN, Sun LJ, Xu JJ, Hui YR, Li XF, Li LY, Zhao YX, Suo XG, Xu CH, Ji ML, Sun YY, Huang C, Meng XM, Zhang L, Lv XW, Ye DQ, Li J.	Int J Biol Macromol. 2023 Sep 1;248:125811. doi: 10.1016/j.ijbiomac.2023.125811. Epub 2023 Jul 17.	Chen X	Int J Biol Macromol	2023	2023-07-19		10.1016/j.ijbiomac.2023.125811
37805597	Association between ankylosing spondylitis and m6A methylation	Luan Z, Wang Y.	J Orthop Surg Res. 2023 Oct 7;18(1):757. doi: 10.1186/s13018-023-04254-x.	Luan Z	J Orthop Surg Res	2023	2023-10-07	PMC10559441	10.1186/s13018-023-04254-x
33839323	The evolving landscape of N(6)-methyladenosine modification in the tumor microenvironment	Gu Y, Wu X, Zhang J, Fang Y, Pan Y, Shu Y, Ma P.	Mol Ther. 2021 May 5;29(5):1703-1715. doi: 10.1016/j.ymthe.2021.04.009. Epub 2021 Apr 9.	Gu Y	Mol Ther	2021	2021-04-11	PMC8116604	10.1016/j.ymthe.2021.04.009
36072293	Interaction between N6-methyladenosine and autophagy in the regulation of bone and tissue degeneration	Wen X, Wang J, Wang Q, Liu P, Zhao H.	Front Bioeng Biotechnol. 2022 Aug 22;10:978283. doi: 10.3389/fbioe.2022.978283. eCollection 2022.	Wen X	Front Bioeng Biotechnol	2022	2022-09-08	PMC9443517	10.3389/fbioe.2022.978283
36793898	Association between autophagy and acute pancreatitis	Zhang T, Gan Y, Zhu S.	Front Genet. 2023 Jan 30;14:998035. doi: 10.3389/fgene.2023.998035. eCollection 2023.	Zhang T	Front Genet	2023	2023-02-16	PMC9923090	10.3389/fgene.2023.998035
38098098	Transcriptome-wide map of N6-methyladenosine (m6A) profiling in coronary artery disease (CAD) with clopidogrel resistance	Yu R, Yu Q, Li Z, Li J, Yang J, Hu Y, Zheng N, Li X, Song Y, Li J, Chen X, Du W, Su J.	Clin Epigenetics. 2023 Dec 15;15(1):194. doi: 10.1186/s13148-023-01602-w.	Yu R	Clin Epigenetics	2023	2023-12-15	PMC10722764	10.1186/s13148-023-01602-w
36922750	The Loss of YTHDC1 in Gut Macrophages Exacerbates Inflammatory Bowel Disease	Ge X, Xue G, Ding Y, Li R, Hu K, Xu T, Sun M, Liao W, Zhao B, Wen C, Du J.	Adv Sci (Weinh). 2023 May;10(14):e2205620. doi: 10.1002/advs.202205620. Epub 2023 Mar 15.	Ge X	Adv Sci (Weinh)	2023	2023-03-16	PMC10190588	10.1002/advs.202205620
37178254	Insights into N6-methyladenosine (m6A) modification of noncoding RNA in tumor microenvironment	Zhang Y, Zhan L, Li J, Jiang X, Yin L.	Aging (Albany NY). 2023 May 12;15(9):3857-3889. doi: 10.18632/aging.204679. Epub 2023 May 12.	Zhang Y	Aging (Albany NY)	2023	2023-05-13	PMC10449301	10.18632/aging.204679
31735169	YTHDF2 reduction fuels inflammation and vascular abnormalization in hepatocellular carcinoma	Hou J, Zhang H, Liu J, Zhao Z, Wang J, Lu Z, Hu B, Zhou J, Zhao Z, Feng M, Zhang H, Shen B, Huang X, Sun B, Smyth MJ, He C, Xia Q.	Mol Cancer. 2019 Nov 18;18(1):163. doi: 10.1186/s12943-019-1082-3.	Hou J	Mol Cancer	2019	2019-11-19	PMC6859620	10.1186/s12943-019-1082-3
37784134	M6A methylation modification in autoimmune diseases, a promising treatment strategy based on epigenetics	Huang Y, Xue Q, Chang J, Wang Y, Cheng C, Xu S, Wang X, Miao C.	Arthritis Res Ther. 2023 Oct 2;25(1):189. doi: 10.1186/s13075-023-03149-w.	Huang Y	Arthritis Res Ther	2023	2023-10-02	PMC10544321	10.1186/s13075-023-03149-w
36246528	Crosstalk among N6-methyladenosine modification and RNAs in central nervous system injuries	Tian M, Mao L, Zhang L.	Front Cell Neurosci. 2022 Sep 29;16:1013450. doi: 10.3389/fncel.2022.1013450. eCollection 2022.	Tian M	Front Cell Neurosci	2022	2022-10-17	PMC9556889	10.3389/fncel.2022.1013450
37223523	The essential role of N6-methyladenosine RNA methylation in complex eye diseases	Li X, Ma B, Zhang W, Song Z, Zhang X, Liao M, Li X, Zhao X, Du M, Yu J, He S, Yan H.	Genes Dis. 2022 May 26;10(2):505-520. doi: 10.1016/j.gendis.2022.05.008. eCollection 2023 Mar.	Li X	Genes Dis	2022	2023-05-24	PMC10201676	10.1016/j.gendis.2022.05.008
37492748	FTO-mediated m6A modification alleviates autoimmune uveitis by regulating microglia phenotypes via the GPC4/TLR4/NF-κB signaling axis	He S, Li W, Wang G, Wang X, Fan W, Zhang Z, Li N, Hou S.	Genes Dis. 2022 Oct 4;10(5):2179-2193. doi: 10.1016/j.gendis.2022.09.008. eCollection 2023 Sep.	He S	Genes Dis	2022	2023-07-26	PMC10363593	10.1016/j.gendis.2022.09.008
37865637	IGF2BP2-meidated m(6)A modification of CSF2 reprograms MSC to promote gastric cancer progression	Ji R, Wu C, Yao J, Xu J, Lin J, Gu H, Fu M, Zhang X, Li Y, Zhang X.	Cell Death Dis. 2023 Oct 21;14(10):693. doi: 10.1038/s41419-023-06163-7.	Ji R	Cell Death Dis	2023	2023-10-21	PMC10590395	10.1038/s41419-023-06163-7
38062765	Epigenetic regulation by quercetin: a comprehensive review focused on its biological mechanisms	Zhu J, Cheng X, Naumovski N, Hu L, Wang K.	Crit Rev Food Sci Nutr. 2023 Dec 7:1-20. doi: 10.1080/10408398.2023.2278760. Online ahead of print.	Zhu J	Crit Rev Food Sci Nutr	2023	2023-12-08		10.1080/10408398.2023.2278760
35735243	Novel insights into the interaction between N6-methyladenosine methylation and noncoding RNAs in musculoskeletal disorders	Han J, Kong H, Wang X, Zhang XA.	Cell Prolif. 2022 Oct;55(10):e13294. doi: 10.1111/cpr.13294. Epub 2022 Jun 23.	Han J	Cell Prolif	2022	2022-06-23	PMC9528765	10.1111/cpr.13294
37273867	Critical roles of m(6)A methylation in cardiovascular diseases	Zhang X, Cai H, Xu H, Dong S, Ma H.	Front Cardiovasc Med. 2023 May 19;10:1187514. doi: 10.3389/fcvm.2023.1187514. eCollection 2023.	Zhang X	Front Cardiovasc Med	2023	2023-06-05	PMC10235536	10.3389/fcvm.2023.1187514
37400752	Epigenetic regulatory mechanism of ADAMTS12 expression in osteoarthritis	Yang S, Zhou X, Jia Z, Zhang M, Yuan M, Zhou Y, Wang J, Xia D.	Mol Med. 2023 Jul 3;29(1):86. doi: 10.1186/s10020-023-00661-2.	Yang S	Mol Med	2023	2023-07-03	PMC10318776	10.1186/s10020-023-00661-2
37759224	CRISPR-Cas9 knockout screening identifies KIAA1429 as an essential gene in Ewing sarcoma	Tan K, Lu W, Chen F, Shi H, Ma Y, Chen Z, Wu W, Lv Z, Mo J.	J Exp Clin Cancer Res. 2023 Sep 28;42(1):250. doi: 10.1186/s13046-023-02828-5.	Tan K	J Exp Clin Cancer Res	2023	2023-09-27	PMC10537923	10.1186/s13046-023-02828-5
37978362	Identification and validation of m(6)A RNA regulatory network in pulpitis	Xu H, Chen G, Zhou J, Zhou X, Wang P, Chen C, Xu Z, Lv F, Li X.	BMC Oral Health. 2023 Nov 17;23(1):878. doi: 10.1186/s12903-023-03578-8.	Xu H	BMC Oral Health	2023	2023-11-18	PMC10656916	10.1186/s12903-023-03578-8
34975810	Regulation of Antiviral Immune Response by N (6)-Methyladenosine of mRNA	Zhao B, Wang W, Zhao Y, Qiao H, Gao Z, Chuai X.	Front Microbiol. 2021 Dec 16;12:789605. doi: 10.3389/fmicb.2021.789605. eCollection 2021.	Zhao B	Front Microbiol	2021	2022-01-03	PMC8716812	10.3389/fmicb.2021.789605
36625663	Epitranscriptomic N(6)-Methyladenosine Profile of SARS-CoV-2-Infected Human Lung Epithelial Cells	Phillips S, Mishra T, Khadka S, Bohan D, Espada CE, Maury W, Wu L.	Microbiol Spectr. 2023 Feb 14;11(1):e0394322. doi: 10.1128/spectrum.03943-22. Epub 2023 Jan 10.	Phillips S	Microbiol Spectr	2023	2023-01-10	PMC9927293	10.1128/spectrum.03943-22
35223837	Links Between N (6)-Methyladenosine and Tumor Microenvironments in Colorectal Cancer	Zhang Y, Zhang K, Gong H, Li Q, Man L, Jin Q, Zhang L, Li S.	Front Cell Dev Biol. 2022 Feb 10;10:807129. doi: 10.3389/fcell.2022.807129. eCollection 2022.	Zhang Y	Front Cell Dev Biol	2022	2022-02-28	PMC8866562	10.3389/fcell.2022.807129
37979906	Increased m6A-RNA methylation and demethylase FTO suppression is associated with silica-induced pulmonary inflammation and fibrosis	Xu Y, Wang L, Qian R, Zhao M, Chen X, Sun D, Wang Y, Cheng W, Chen Y, He Q, Dai Y, Yao Y.	Toxicology. 2023 Dec;500:153673. doi: 10.1016/j.tox.2023.153673. Epub 2023 Nov 16.	Xu Y	Toxicology	2023	2023-11-18		10.1016/j.tox.2023.153673
35236212	Role of N6-methyladenosine modification in pathogenesis of ischemic stroke	Chang H, Yang J, Wang Q, Zhao J, Zhu R.	Expert Rev Mol Diagn. 2022 Mar;22(3):295-303. doi: 10.1080/14737159.2022.2049246. Epub 2022 Mar 8.	Chang H	Expert Rev Mol Diagn	2022	2022-03-03		10.1080/14737159.2022.2049246
35253196	The potential roles of RNA N6-methyladenosine in atherosclerosis	Chen LH, Zhao YY, Huang L, Li YZ, Xu HQ, Yang C, Zhang C.	Eur Rev Med Pharmacol Sci. 2022 Feb;26(4):1075-1083. doi: 10.26355/eurrev_202202_28096.	Chen LH	Eur Rev Med Pharmacol Sci	2022	2022-03-07		10.26355/eurrev_202202_28096
37259293	Epigenetic Regulation of Macrophage Polarization in Cardiovascular Diseases	Komal S, Han SN, Cui LG, Zhai MM, Zhou YJ, Wang P, Shakeel M, Zhang LR.	Pharmaceuticals (Basel). 2023 Jan 18;16(2):141. doi: 10.3390/ph16020141.	Komal S	Pharmaceuticals (Basel)	2023	2023-06-01	PMC9963081	10.3390/ph16020141
36354766	The Mechanism and Role of N(6)-Methyladenosine (m(6)A) Modification in Atherosclerosis and Atherosclerotic Diseases	Tan Q, He S, Leng X, Zheng D, Mao F, Hao J, Chen K, Jiang H, Lin Y, Yang J.	J Cardiovasc Dev Dis. 2022 Oct 25;9(11):367. doi: 10.3390/jcdd9110367.	Tan Q	J Cardiovasc Dev Dis	2022	2022-11-10	PMC9697759	10.3390/jcdd9110367
35754944	Epigenetics in susceptibility, progression, and diagnosis of periodontitis	Suzuki S, Yamada S.	Jpn Dent Sci Rev. 2022 Nov;58:183-192. doi: 10.1016/j.jdsr.2022.06.001. Epub 2022 Jun 17.	Suzuki S	Jpn Dent Sci Rev	2022	2022-06-27	PMC9218144	10.1016/j.jdsr.2022.06.001
37952687	Mettl3/Ythdf2 regulate macrophage inflammation and ROS generation by controlling Pyk2 mRNA stability	Cai Y, Yu R, Zhang Z, Li D, Yi B, Feng Z, Xu Q.	Immunol Lett. 2023 Dec;264:64-73. doi: 10.1016/j.imlet.2023.11.004. Epub 2023 Nov 10.	Cai Y	Immunol Lett	2023	2023-11-12		10.1016/j.imlet.2023.11.004
36227651	m(6) A demethylase Fto regulates the TNF-α-induced inflammatory response in cementoblasts	Li B, Du M, Sun Q, Cao Z, He H.	Oral Dis. 2023 Oct;29(7):2806-2815. doi: 10.1111/odi.14396. Epub 2022 Nov 13.	Li B	Oral Dis	2023	2022-10-13		10.1111/odi.14396
35840562	N(6)-methyladenosine (m(6)A) methyltransferase METTL3 regulates sepsis-induced myocardial injury through IGF2BP1/HDAC4 dependent manner	Shen H, Xie K, Li M, Yang Q, Wang X.	Cell Death Discov. 2022 Jul 15;8(1):322. doi: 10.1038/s41420-022-01099-x.	Shen H	Cell Death Discov	2022	2022-07-15	PMC9287338	10.1038/s41420-022-01099-x
34215679	The m(6)A reader IMP2 directs autoimmune inflammation through an IL-17- and TNFα-dependent C/EBP transcription factor axis	Bechara R, Amatya N, Bailey RD, Li Y, Aggor FEY, Li DD, Jawale CV, Coleman BM, Dai N, Gokhale NS, Taylor TC, Horner SM, Poholek AC, Bansal A, Biswas PS, Gaffen SL.	Sci Immunol. 2021 Jul 2;6(61):eabd1287. doi: 10.1126/sciimmunol.abd1287.	Bechara R	Sci Immunol	2021	2021-07-03	PMC8404281	10.1126/sciimmunol.abd1287
37551785	N6-methyladenosine methylation regulator RBM15 promotes the progression of diabetic nephropathy by regulating cell proliferation, inflammation, oxidative stress, and pyroptosis through activating the AGE-RAGE pathway	Qin Y, Wu S, Zhang F, Zhou X, You C, Tan F.	Environ Toxicol. 2023 Nov;38(11):2772-2782. doi: 10.1002/tox.23917. Epub 2023 Aug 8.	Qin Y	Environ Toxicol	2023	2023-08-08		10.1002/tox.23917
36278325	Emerging role of N6-methyladenosine RNA methylation in lung diseases	Xu L, Zhou L, Yan C, Li L.	Exp Biol Med (Maywood). 2022 Oct;247(20):1862-1872. doi: 10.1177/15353702221128564. Epub 2022 Oct 22.	Xu L	Exp Biol Med (Maywood)	2022	2022-10-24	PMC9679358	10.1177/15353702221128564
37975549	RNA methylation: A potential therapeutic target in autoimmune disease	Li L, Xia X, Yang T, Sun Y, Liu X, Xu W, Lu M, Cui D, Wu Y.	Int Rev Immunol. 2024 May;43(3):160-177. doi: 10.1080/08830185.2023.2280544. Epub 2023 Nov 17.	Li L	Int Rev Immunol	2024	2023-11-17		10.1080/08830185.2023.2280544
36482903	Novel insight of N(6)-methyladenosine modified subtypes in abdominal aortic aneurysm	Wang K, Kan Q, Ye Y, Qiu J, Huang L, Wu R, Yao C.	Front Genet. 2022 Nov 22;13:1055396. doi: 10.3389/fgene.2022.1055396. eCollection 2022.	Wang K	Front Genet	2022	2022-12-09	PMC9723249	10.3389/fgene.2022.1055396
36263168	N6-methyladenosine of Socs1 modulates macrophage inflammatory response in different stiffness environments	Hu Z, Li Y, Yuan W, Jin L, Leung WK, Zhang C, Yang Y.	Int J Biol Sci. 2022 Sep 11;18(15):5753-5769. doi: 10.7150/ijbs.74196. eCollection 2022.	Hu Z	Int J Biol Sci	2022	2022-10-20	PMC9576523	10.7150/ijbs.74196
35001873	RNA N(6)-methyladenosine modulates endothelial atherogenic responses to disturbed flow in mice	Li B, Zhang T, Liu M, Cui Z, Zhang Y, Liu M, Liu Y, Sun Y, Li M, Tian Y, Yang Y, Jiang H, Liang D.	Elife. 2022 Jan 10;11:e69906. doi: 10.7554/eLife.69906.	Li B	Elife	2022	2022-01-10	PMC8794471	10.7554/eLife.69906
37858336	Non-canonical function of histone methyltransferase G9a in the translational regulation of chronic inflammation	Muneer A, Wang L, Xie L, Zhang F, Wu B, Mei L, Lenarcic EM, Feng EH, Song J, Xiong Y, Yu X, Wang C, Jain K, Strahl BD, Cook JG, Wan YY, Moorman NJ, Song H, Jin J, Chen X.	Cell Chem Biol. 2023 Dec 21;30(12):1525-1541.e7. doi: 10.1016/j.chembiol.2023.09.012. Epub 2023 Oct 19.	Muneer A	Cell Chem Biol	2023	2023-10-20	PMC11095832	10.1016/j.chembiol.2023.09.012
36684373	Regulatory mechanism of circular RNA involvement in osteoarthritis	Zhang Y, Liu L, Liu K, Wang M, Su X, Wang J.	Front Surg. 2023 Jan 6;9:1049513. doi: 10.3389/fsurg.2022.1049513. eCollection 2022.	Zhang Y	Front Surg	2023	2023-01-23	PMC9852714	10.3389/fsurg.2022.1049513
35951238	The role of N6-methyladenosine methylation in environmental exposure-induced health damage	Feng Y, Liu T, Xu S, Ren Y, Ge Y, Yin L, Pu Y, Liang G.	Environ Sci Pollut Res Int. 2022 Oct;29(46):69153-69175. doi: 10.1007/s11356-022-22093-x. Epub 2022 Aug 11.	Feng Y	Environ Sci Pollut Res Int	2022	2022-08-11		10.1007/s11356-022-22093-x
32642280	METTL3 plays multiple functions in biological processes	Liu S, Zhuo L, Wang J, Zhang Q, Li Q, Li G, Yan L, Jin T, Pan T, Sui X, Lv Q, Xie T.	Am J Cancer Res. 2020 Jun 1;10(6):1631-1646. eCollection 2020.	Liu S	Am J Cancer Res	2020	2020-07-10	PMC7339281
33630241	N6-Adenosine Methylation (m(6)A) RNA Modification: an Emerging Role in Cardiovascular Diseases	Chen YS, Ouyang XP, Yu XH, Novák P, Zhou L, He PP, Yin K.	J Cardiovasc Transl Res. 2021 Oct;14(5):857-872. doi: 10.1007/s12265-021-10108-w. Epub 2021 Feb 25.	Chen YS	J Cardiovasc Transl Res	2021	2021-02-25		10.1007/s12265-021-10108-w
36706633	m6A modification in inflammatory bowel disease provides new insights into clinical applications	Zhang J, Song B, Zeng Y, Xu C, Gao L, Guo Y, Liu J.	Biomed Pharmacother. 2023 Mar;159:114298. doi: 10.1016/j.biopha.2023.114298. Epub 2023 Jan 25.	Zhang J	Biomed Pharmacother	2023	2023-01-27		10.1016/j.biopha.2023.114298
34930676	N(6)-methyladenosine-modified long non-coding RNA AGAP2-AS1 promotes psoriasis pathogenesis via miR-424-5p/AKT3 axis	Xian J, Shang M, Dai Y, Wang Q, Long X, Li J, Cai Y, Xia C, Peng X.	J Dermatol Sci. 2022 Jan;105(1):27-36. doi: 10.1016/j.jdermsci.2021.11.007. Epub 2021 Nov 18.	Xian J	J Dermatol Sci	2022	2021-12-21		10.1016/j.jdermsci.2021.11.007
34737744	N(6)-Methyladenosine Methylomic Landscape of Lung Tissues in Murine Acute Allergic Asthma	Teng F, Tang W, Wuniqiemu T, Qin J, Zhou Y, Huang X, Wang S, Zhu X, Tang Z, Yi L, Wei Y, Dong J.	Front Immunol. 2021 Oct 19;12:740571. doi: 10.3389/fimmu.2021.740571. eCollection 2021.	Teng F	Front Immunol	2021	2021-11-05	PMC8560743	10.3389/fimmu.2021.740571
35752056	METTL3 plays a crucial function in multiple biological processes	Li G, Sun Z, Deng W, Cheng S, Liu X, Liu J, Tang X, Zhang Z.	Acta Histochem. 2022 Aug;124(6):151916. doi: 10.1016/j.acthis.2022.151916. Epub 2022 Jun 22.	Li G	Acta Histochem	2022	2022-06-25		10.1016/j.acthis.2022.151916
38158555	N6-methyladenosine in myeloid cells: a novel regulatory factor for inflammation-related diseases	Pang J, Kuang TD, Yu XY, Novák P, Long Y, Liu M, Deng WQ, Zhu X, Yin K.	J Physiol Biochem. 2024 May;80(2):249-260. doi: 10.1007/s13105-023-01002-x. Epub 2023 Dec 30.	Pang J	J Physiol Biochem	2024	2023-12-29		10.1007/s13105-023-01002-x
33220174	N(6)-Adenosine Methylation of Socs1 mRNA Is Required to Sustain the Negative Feedback Control of Macrophage Activation	Du J, Liao W, Liu W, Deb DK, He L, Hsu PJ, Nguyen T, Zhang L, Bissonnette M, He C, Li YC.	Dev Cell. 2020 Dec 21;55(6):737-753.e7. doi: 10.1016/j.devcel.2020.10.023. Epub 2020 Nov 20.	Du J	Dev Cell	2020	2020-11-21	PMC7755741	10.1016/j.devcel.2020.10.023
37348827	The dysregulation of lncRNAs by epigenetic factors in human pathologies	Zhang Y, Wang X, Zhang C, Yi H.	Drug Discov Today. 2023 Sep;28(9):103664. doi: 10.1016/j.drudis.2023.103664. Epub 2023 Jun 20.	Zhang Y	Drug Discov Today	2023	2023-06-22		10.1016/j.drudis.2023.103664
35137116	Function of m6A and its regulation of domesticated animals' complex traits	Mi S, Shi Y, Dari G, Yu Y.	J Anim Sci. 2022 Mar 1;100(3):skac034. doi: 10.1093/jas/skac034.	Mi S	J Anim Sci	2022	2022-02-09	PMC8942107	10.1093/jas/skac034
38157641	Emerging roles and mechanism of m6A methylation in rheumatoid arthritis	Xu Y, Liu W, Ren L.	Biomed Pharmacother. 2024 Jan;170:116066. doi: 10.1016/j.biopha.2023.116066. Epub 2023 Dec 28.	Xu Y	Biomed Pharmacother	2024	2023-12-29		10.1016/j.biopha.2023.116066
37054473	Integrated analysis of transcriptome-wide m(6)A methylation in a Cd-induced kidney injury rat model	Li S, Zhou H, Liang Y, Yang Q, Zhang J, Shen W, Lei L.	Ecotoxicol Environ Saf. 2023 May;256:114903. doi: 10.1016/j.ecoenv.2023.114903. Epub 2023 Apr 11.	Li S	Ecotoxicol Environ Saf	2023	2023-04-13		10.1016/j.ecoenv.2023.114903
37156113	The roles and mechanism of m(6)A RNA methylation regulators in cancer immunity	Chen L, He Y, Zhu J, Zhao S, Qi S, Chen X, Zhang H, Ni Z, Zhou Y, Chen G, Liu S, Xie T.	Biomed Pharmacother. 2023 Jul;163:114839. doi: 10.1016/j.biopha.2023.114839. Epub 2023 May 8.	Chen L	Biomed Pharmacother	2023	2023-05-08		10.1016/j.biopha.2023.114839
35462896	The Emerging Role of N6-Methyladenosine RNA Methylation as Regulators in Cancer Therapy and Drug Resistance	Chen Z, Hu Y, Jin L, Yang F, Ding H, Zhang L, Li L, Pan T.	Front Pharmacol. 2022 Apr 6;13:873030. doi: 10.3389/fphar.2022.873030. eCollection 2022.	Chen Z	Front Pharmacol	2022	2022-04-25	PMC9022635	10.3389/fphar.2022.873030
35813860	Immune Infiltration and N(6)-Methyladenosine ncRNA Isoform Detection in Acute Lung Injury	Gu C, Li C, Wang W, Yan W, Yao Y, Shi M, Han F, Shang A.	J Oncol. 2022 Jun 30;2022:3922299. doi: 10.1155/2022/3922299. eCollection 2022.	Gu C	J Oncol	2022	2022-07-11	PMC9262529	10.1155/2022/3922299
37386028	The mRNA methyltransferase Mettl3 modulates cytokine mRNA stability and limits functional responses in mast cells	Leoni C, Bataclan M, Ito-Kureha T, Heissmeyer V, Monticelli S.	Nat Commun. 2023 Jun 29;14(1):3862. doi: 10.1038/s41467-023-39614-y.	Leoni C	Nat Commun	2023	2023-06-29	PMC10310798	10.1038/s41467-023-39614-y
37402945	Modulation of miR-146b by N6-methyladenosine modification remodels tumor-associated macrophages and enhances anti-PD-1 therapy in colorectal cancer	He S, Song W, Cui S, Li J, Jiang Y, Chen X, Peng L.	Cell Oncol (Dordr). 2023 Dec;46(6):1731-1746. doi: 10.1007/s13402-023-00839-0. Epub 2023 Jul 5.	He S	Cell Oncol (Dordr)	2023	2023-07-04	PMC10697876	10.1007/s13402-023-00839-0
33979630	The potential role of m6A RNA methylation in diabetic retinopathy	Kumari N, Karmakar A, Ahamad Khan MM, Ganesan SK.	Exp Eye Res. 2021 Jul;208:108616. doi: 10.1016/j.exer.2021.108616. Epub 2021 May 9.	Kumari N	Exp Eye Res	2021	2021-05-12		10.1016/j.exer.2021.108616
34523134	RNA-binding proteins and RNA methylation in myeloid cells	Bataclan M, Leoni C, Monticelli S.	Immunol Rev. 2021 Nov;304(1):51-61. doi: 10.1111/imr.13025. Epub 2021 Sep 14.	Bataclan M	Immunol Rev	2021	2021-09-15	PMC7615035	10.1111/imr.13025
37983949	AGAP2-AS1 promotes the assembly of m6A methyltransferases and activation of the IL6/STAT3 pathway by binding with WTAP in the carcinogenesis of gastric cancer	Nie K, Zheng Z, Li J, Chang Y, Deng Z, Huang W, Li X.	FASEB J. 2023 Dec;37(12):e23302. doi: 10.1096/fj.202301249R.	Nie K	FASEB J	2023	2023-11-20		10.1096/fj.202301249R
35878734	N6-methyladenosine demethylase FTO regulates inflammatory cytokine secretion and tight junctions in retinal pigment epithelium cells	Tang S, Meng J, Tan J, Liu X, Zhou H, Li N, Hou S.	Clin Immunol. 2022 Aug;241:109080. doi: 10.1016/j.clim.2022.109080. Epub 2022 Jul 22.	Tang S	Clin Immunol	2022	2022-07-25		10.1016/j.clim.2022.109080
37076497	LncRNA UCA1 promotes keratinocyte-driven inflammation via suppressing METTL14 and activating the HIF-1α/NF-κB axis in psoriasis	Hu Y, Lei L, Jiang L, Zeng H, Zhang Y, Fu C, Guo H, Dong Y, Ouyang Y, Zhang X, Huang J, Zeng Q, Chen J.	Cell Death Dis. 2023 Apr 20;14(4):279. doi: 10.1038/s41419-023-05790-4.	Hu Y	Cell Death Dis	2023	2023-04-19	PMC10115875	10.1038/s41419-023-05790-4
37292629	Accumulation of m(6)A exhibits stronger correlation with MAPT than β-amyloid pathology in an APP(NL-G-F) /MAPT(P301S) mouse model of Alzheimer's disease	Jiang L, Roberts R, Wong M, Zhang L, Webber CJ, Kilci A, Jenkins M, Sun J, Sun G, Rashad S, Dedon PC, Daley SA, Xia W, Ortiz AR, Dorrian L, Saito T, Saido TC, Wolozin B.	Res Sq [Preprint]. 2023 May 18:rs.3.rs-2745852. doi: 10.21203/rs.3.rs-2745852/v1.	Jiang L	Res Sq	2023	2023-06-09	PMC10246280	10.21203/rs.3.rs-2745852/v1
34124185	Transcriptome and N6-Methyladenosine RNA Methylome Analyses in Aortic Dissection and Normal Human Aorta	Zhou X, Chen Z, Zhou J, Liu Y, Fan R, Sun T.	Front Cardiovasc Med. 2021 May 28;8:627380. doi: 10.3389/fcvm.2021.627380. eCollection 2021.	Zhou X	Front Cardiovasc Med	2021	2021-06-14	PMC8193080	10.3389/fcvm.2021.627380
35836571	m6A Methylation in Cardiovascular Diseases: From Mechanisms to Therapeutic Potential	Li L, Xu N, Liu J, Chen Z, Liu X, Wang J.	Front Genet. 2022 Jun 28;13:908976. doi: 10.3389/fgene.2022.908976. eCollection 2022.	Li L	Front Genet	2022	2022-07-15	PMC9274458	10.3389/fgene.2022.908976
35251466	N(6)-Methyladenosine Modification Profile in Bovine Mammary Epithelial Cells Treated with Heat-Inactivated Staphylococcus aureus	Li T, Zhu Y, Lin C, Chen J, Yin Y, Tang X, Chen Y, Guo A, Hu C.	Oxid Med Cell Longev. 2022 Feb 23;2022:1704172. doi: 10.1155/2022/1704172. eCollection 2022.	Li T	Oxid Med Cell Longev	2022	2022-03-07	PMC8890870	10.1155/2022/1704172
35444650	N(6)-Methyladenosine-Modified circRNA in the Bovine Mammary Epithelial Cells Injured by Staphylococcus aureus and Escherichia coli	Xu H, Lin C, Li T, Zhu Y, Yang J, Chen S, Chen J, Chen X, Chen Y, Guo A, Hu C.	Front Immunol. 2022 Apr 4;13:873330. doi: 10.3389/fimmu.2022.873330. eCollection 2022.	Xu H	Front Immunol	2022	2022-04-21	PMC9014013	10.3389/fimmu.2022.873330
36674918	METTL3 Regulates Osteoclast Biological Behaviors via iNOS/NO-Mediated Mitochondrial Dysfunction in Inflammatory Conditions	Li D, He J, Fang C, Zhang Y, He M, Zhang Z, Hou J, Xu Q.	Int J Mol Sci. 2023 Jan 11;24(2):1403. doi: 10.3390/ijms24021403.	Li D	Int J Mol Sci	2023	2023-01-21	PMC9862541	10.3390/ijms24021403
37509095	Infection Meets Inflammation: N6-Methyladenosine, an Internal Messenger RNA Modification as a Tool for Pharmacological Regulation of Host-Pathogen Interactions	Leseva MN, Buttari B, Saso L, Dimitrova PA.	Biomolecules. 2023 Jun 29;13(7):1060. doi: 10.3390/biom13071060.	Leseva MN	Biomolecules	2023	2023-07-29	PMC10377384	10.3390/biom13071060
36333113	PARP1 Is Upregulated by Hyperglycemia Via N6-methyladenosine Modification and Promotes Diabetic Retinopathy	Sun J, Liu G, Chen R, Zhou J, Chen T, Cheng Y, Lou Q, Wang H.	Discov Med. 2022 Sep-Oct;34(172):115-129.	Sun J	Discov Med	2022	2022-11-04
37414203	m6A-mediated upregulation of miRNA-193a aggravates cardiomyocyte apoptosis and inflammatory response in sepsis-induced cardiomyopathy via the METTL3/ miRNA-193a/BCL2L2 pathway	Liang L, Liu S, Wu Q, Chen R, Jiang S, Yang Z.	Exp Cell Res. 2023 Sep 1;430(1):113712. doi: 10.1016/j.yexcr.2023.113712. Epub 2023 Jul 5.	Liang L	Exp Cell Res	2023	2023-07-06		10.1016/j.yexcr.2023.113712
36120320	New roles of N6-methyladenosine methylation system regulating the occurrence of non-alcoholic fatty liver disease with N6-methyladenosine-modified MYC	Cheng W, Li M, Zhang L, Zhou C, Yu S, Peng X, Zhang W, Zhang W.	Front Pharmacol. 2022 Aug 31;13:973116. doi: 10.3389/fphar.2022.973116. eCollection 2022.	Cheng W	Front Pharmacol	2022	2022-09-19	PMC9471244	10.3389/fphar.2022.973116
36058047	Critical role of m(6)A modification in T-helper cell disorders	Chen X, Tong X, Zhou L, Huang J, Gao L, Zeng J, Tan L.	Mol Immunol. 2022 Nov;151:1-10. doi: 10.1016/j.molimm.2022.08.015. Epub 2022 Sep 1.	Chen X	Mol Immunol	2022	2022-09-04		10.1016/j.molimm.2022.08.015
37914138	METTL3-Mediated STING Upregulation and Activation in Kupffer Cells Contribute to Radiation-Induced Liver Disease via Pyroptosis	Wang B, Zhang Y, Niu H, Zhao X, Chen G, Zhao Q, Ma G, Du S, Zeng Z.	Int J Radiat Oncol Biol Phys. 2024 May 1;119(1):219-233. doi: 10.1016/j.ijrobp.2023.10.041. Epub 2023 Oct 31.	Wang B	Int J Radiat Oncol Biol Phys	2024	2023-11-01		10.1016/j.ijrobp.2023.10.041
38026444	The m6A reader YTHDF2 alleviates the inflammatory response by inhibiting IL-6R/JAK2/STAT1 pathway-mediated high-mobility group box-1 release	Zeng Z, Lan Y, Zhang L, Chen Y, Gong Y, Zuo F, Li J, Luo G, Peng Y, Yuan Z.	Burns Trauma. 2023 Oct 15;11:tkad023. doi: 10.1093/burnst/tkad023. eCollection 2023.	Zeng Z	Burns Trauma	2023	2023-11-29	PMC10650363	10.1093/burnst/tkad023
33232273	Exploring diagnostic m6A regulators in endometriosis	Jiang L, Zhang M, Wu J, Wang S, Yang X, Yi M, Zhang X, Fang X.	Aging (Albany NY). 2020 Nov 24;12(24):25916-25938. doi: 10.18632/aging.202163. Epub 2020 Nov 24.	Jiang L	Aging (Albany NY)	2020	2020-11-24	PMC7803542	10.18632/aging.202163
38014839	N6-methyladenosine modification of TSC1 mRNA contributes to macrophage polarization regulated by Coptisine in DSS-induced ulcerative colitis	Zhao M, Li P, Qiao D, Hua S, Yue Q, Dai Y, Huang Y, Jiang J, Yin H, Li M, Ding Y, Yang X, Ma Y, Ding K, Zeng L.	Phytomedicine. 2024 Jan;122:155153. doi: 10.1016/j.phymed.2023.155153. Epub 2023 Oct 17.	Zhao M	Phytomedicine	2024	2023-11-28		10.1016/j.phymed.2023.155153
35363433	Role of N6-methyladenosine RNA modification in the imbalanced inflammatory homeostasis of arsenic-induced skin lesions	Yang F, Zhang A.	Environ Toxicol. 2022 Aug;37(8):1831-1839. doi: 10.1002/tox.23530. Epub 2022 Apr 1.	Yang F	Environ Toxicol	2022	2022-04-01		10.1002/tox.23530
37741489	YTHDF1 shapes "cold" tumor and inhibits CD8(+) T cells infiltration and function in breast cancer	Jing L, Zhou K, Wang Z, Li Y, Fan Y, Liu T, Shan Z, Lin Y.	Exp Cell Res. 2023 Nov 15;432(2):113778. doi: 10.1016/j.yexcr.2023.113778. Epub 2023 Sep 22.	Jing L	Exp Cell Res	2023	2023-09-23		10.1016/j.yexcr.2023.113778
36066844	Role of m6A RNA methylation in the development of hepatitis B virus-associated hepatocellular carcinoma	Zhang C, Dai D, Zhang W, Yang W, Guo Y, Wei Q.	J Gastroenterol Hepatol. 2022 Nov;37(11):2039-2050. doi: 10.1111/jgh.15999. Epub 2022 Sep 20.	Zhang C	J Gastroenterol Hepatol	2022	2022-09-06		10.1111/jgh.15999
33593354	The biological function of m6A reader YTHDF2 and its role in human disease	Wang JY, Lu AQ.	Cancer Cell Int. 2021 Feb 16;21(1):109. doi: 10.1186/s12935-021-01807-0.	Wang JY	Cancer Cell Int	2021	2021-02-17	PMC7885220	10.1186/s12935-021-01807-0
35098923	m6A modifications regulate intestinal immunity and rotavirus infection	Wang A, Tao W, Tong J, Gao J, Wang J, Hou G, Qian C, Zhang G, Li R, Wang D, Ren X, Zhang K, Ding S, Flavell RA, Li H, Pan W, Zhu S.	Elife. 2022 Jan 31;11:e73628. doi: 10.7554/eLife.73628.	Wang A	Elife	2022	2022-01-31	PMC8860440	10.7554/eLife.73628
36835655	YTHDF1 Attenuates TBI-Induced Brain-Gut Axis Dysfunction in Mice	Huang P, Liu M, Zhang J, Zhong X, Zhong C.	Int J Mol Sci. 2023 Feb 20;24(4):4240. doi: 10.3390/ijms24044240.	Huang P	Int J Mol Sci	2023	2023-02-25	PMC9966860	10.3390/ijms24044240
38030117	Epigenetic modification of m(6)A methylation: Regulatory factors, functions and mechanism in inflammatory bowel disease	Wang Y, Chen C, Yan W, Fu Y.	Int J Biochem Cell Biol. 2024 Jan;166:106502. doi: 10.1016/j.biocel.2023.106502. Epub 2023 Nov 28.	Wang Y	Int J Biochem Cell Biol	2024	2023-11-29		10.1016/j.biocel.2023.106502
37572160	The m(6)A Reader YTHDF1 Improves Sevoflurane-Induced Neuronal Pyroptosis and Cognitive Dysfunction Through Augmenting CREB-BDNF Signaling	Huang Y, Yang Y, Ye C, Liu Z, Wei F.	Neurochem Res. 2023 Dec;48(12):3625-3638. doi: 10.1007/s11064-023-04007-6. Epub 2023 Aug 12.	Huang Y	Neurochem Res	2023	2023-08-12		10.1007/s11064-023-04007-6
37420298	RNA methylations in hepatic fibrosis, a gradually emerging new treatment strategy	Cheng C, Wu Y, Wang X, Xue Q, Huang Y, Liao F, Wang X, Duan Q, Miao C.	Cell Biosci. 2023 Jul 7;13(1):126. doi: 10.1186/s13578-023-01066-8.	Cheng C	Cell Biosci	2023	2023-07-07	PMC10329392	10.1186/s13578-023-01066-8
36947363	METTL3-METTL14 complex induces necroptosis and inflammation of vascular smooth muscle cells via promoting N6 methyladenosine mRNA methylation of receptor-interacting protein 3 in abdominal aortic aneurysms	Li K, Zhang D, Zhai S, Wu H, Liu H.	J Cell Commun Signal. 2023 Sep;17(3):897-914. doi: 10.1007/s12079-023-00737-y. Epub 2023 Mar 22.	Li K	J Cell Commun Signal	2023	2023-03-22	PMC10409957	10.1007/s12079-023-00737-y
34164910	METTL3/N6-methyladenosine/ miR-21-5p promotes obstructive renal fibrosis by regulating inflammation through SPRY1/ERK/NF-κB pathway activation	Liu E, Lv L, Zhan Y, Ma Y, Feng J, He Y, Wen Y, Zhang Y, Pu Q, Ji F, Yang X, Wen JG.	J Cell Mol Med. 2021 Aug;25(16):7660-7674. doi: 10.1111/jcmm.16603. Epub 2021 Jun 24.	Liu E	J Cell Mol Med	2021	2021-06-24	PMC8358893	10.1111/jcmm.16603
34825733	Mettl3 promotes oxLDL-mediated inflammation through activating STAT1 signaling	Li Z, Xu Q, Huangfu N, Chen X, Zhu J.	J Clin Lab Anal. 2022 Jan;36(1):e24019. doi: 10.1002/jcla.24019. Epub 2021 Nov 26.	Li Z	J Clin Lab Anal	2022	2021-11-26	PMC8761454	10.1002/jcla.24019
35649302	RNA m6A reader YTHDF1 facilitates inflammation via enhancing NLRP3 translation	Hao WY, Lou Y, Hu GY, Qian CY, Liang WR, Zhao J, Wang XH.	Biochem Biophys Res Commun. 2022 Aug 6;616:76-81. doi: 10.1016/j.bbrc.2022.05.076. Epub 2022 May 24.	Hao WY	Biochem Biophys Res Commun	2022	2022-06-01		10.1016/j.bbrc.2022.05.076
32018056	N6-methyladenosine demethylase FTO promotes M1 and M2 macrophage activation	Gu X, Zhang Y, Li D, Cai H, Cai L, Xu Q.	Cell Signal. 2020 May;69:109553. doi: 10.1016/j.cellsig.2020.109553. Epub 2020 Feb 1.	Gu X	Cell Signal	2020	2020-02-05		10.1016/j.cellsig.2020.109553
37275860	Transcriptome-wide identification of altered RNA m(6)A profiles in cardiac tissue of rats with LPS-induced myocardial injury	Wang W, Zhang TN, Yang N, Wen R, Wang YJ, Zhang BL, Yang YH, Liu CF.	Front Immunol. 2023 May 19;14:1122317. doi: 10.3389/fimmu.2023.1122317. eCollection 2023.	Wang W	Front Immunol	2023	2023-06-05	PMC10237353	10.3389/fimmu.2023.1122317
32875102	Interplay of m(6)A and H3K27 trimethylation restrains inflammation during bacterial infection	Wu C, Chen W, He J, Jin S, Liu Y, Yi Y, Gao Z, Yang J, Yang J, Cui J, Zhao W.	Sci Adv. 2020 Aug 19;6(34):eaba0647. doi: 10.1126/sciadv.aba0647. eCollection 2020 Aug.	Wu C	Sci Adv	2020	2020-09-03	PMC7438091	10.1126/sciadv.aba0647
35572575	m6A Reader Igf2bp1 Regulates the Inflammatory Responses of Microglia by Stabilizing Gbp11 and Cp mRNAs	Ding L, Wu H, Wang Y, Li Y, Liang Z, Xia X, Zheng JC.	Front Immunol. 2022 Apr 29;13:872252. doi: 10.3389/fimmu.2022.872252. eCollection 2022.	Ding L	Front Immunol	2022	2022-05-16	PMC9100696	10.3389/fimmu.2022.872252
35518355	The Potential Role of m6A RNA Methylation in the Aging Process and Aging-Associated Diseases	Sun J, Cheng B, Su Y, Li M, Ma S, Zhang Y, Zhang A, Cai S, Bao Q, Wang S, Zhu P.	Front Genet. 2022 Apr 20;13:869950. doi: 10.3389/fgene.2022.869950. eCollection 2022.	Sun J	Front Genet	2022	2022-05-06	PMC9065606	10.3389/fgene.2022.869950
38145842	Epigenetic regulation in epilepsy: A novel mechanism and therapeutic strategy for epilepsy	Chen S, Huang M, Xu D, Li M.	Neurochem Int. 2024 Feb;173:105657. doi: 10.1016/j.neuint.2023.105657. Epub 2023 Dec 23.	Chen S	Neurochem Int	2024	2023-12-25		10.1016/j.neuint.2023.105657
35176940	m(6)A demethylase FTO regulates the apoptosis and inflammation of cardiomyocytes via YAP1 in ischemia-reperfusion injury	Ke WL, Huang ZW, Peng CL, Ke YP.	Bioengineered. 2022 Mar;13(3):5443-5452. doi: 10.1080/21655979.2022.2030572.	Ke WL	Bioengineered	2022	2022-02-18	PMC8974143	10.1080/21655979.2022.2030572
33807762	m6A RNA Methylation in Systemic Autoimmune Diseases-A New Target for Epigenetic-Based Therapy?	Wardowska A.	Pharmaceuticals (Basel). 2021 Mar 5;14(3):218. doi: 10.3390/ph14030218.	Wardowska A	Pharmaceuticals (Basel)	2021	2021-04-03	PMC8001529	10.3390/ph14030218
37903473	YTHDC1-Modified m6A Methylation of Hsa_circ_0102678 Promotes Keratinocyte Inflammation Induced by Cutibacterium acnes Biofilm through Regulating miR-146a/TRAF6 and IRAK1 Axis	Zhou M, Liu Y, Xu H, Chen X, Zheng N, Duan Z, Ge Y, Li D, Lin T, Zeng R, Chen Q, Li M.	J Innate Immun. 2023;15(1):822-835. doi: 10.1159/000534704. Epub 2023 Oct 30.	Zhou M	J Innate Immun	2023	2023-10-30	PMC10684258	10.1159/000534704
34380217	Gamma-irradiation fluctuates the mRNA N(6)-methyladenosine (m(6)A) spectrum of bone marrow in hematopoietic injury	Zhang S, Dong J, Li Y, Xiao H, Shang Y, Wang B, Chen Z, Zhang M, Fan S, Cui M.	Environ Pollut. 2021 Sep 15;285:117509. doi: 10.1016/j.envpol.2021.117509. Epub 2021 Jun 4.	Zhang S	Environ Pollut	2021	2021-08-12		10.1016/j.envpol.2021.117509
33417895	METTL3 is required for maintaining β-cell function	Li X, Jiang Y, Sun X, Wu Y, Chen Z.	Metabolism. 2021 Mar;116:154702. doi: 10.1016/j.metabol.2021.154702. Epub 2021 Jan 6.	Li X	Metabolism	2021	2021-01-08		10.1016/j.metabol.2021.154702
35176453	METTL3 regulates LPS-induced inflammatory response via the NOD1 signaling pathway	Cai Y, Yu R, Kong Y, Feng Z, Xu Q.	Cell Signal. 2022 May;93:110283. doi: 10.1016/j.cellsig.2022.110283. Epub 2022 Feb 14.	Cai Y	Cell Signal	2022	2022-02-17		10.1016/j.cellsig.2022.110283
32767982	Novel insights into the interplay between m(6)A modification and noncoding RNAs in cancer	Yi YC, Chen XY, Zhang J, Zhu JS.	Mol Cancer. 2020 Aug 7;19(1):121. doi: 10.1186/s12943-020-01233-2.	Yi YC	Mol Cancer	2020	2020-08-10	PMC7412851	10.1186/s12943-020-01233-2
35866387	Potential Impact of N6-Methyladenosine RNA Methylation on Vision Function and the Pathological Processes of Ocular Diseases: New Discoveries and Future Perspectives	Li X, Ma B, Liao M, Li L, Zhang X, Du M, Yu J, He S, Yan H.	Front Biosci (Landmark Ed). 2022 Jun 28;27(7):207. doi: 10.31083/j.fbl2707207.	Li X	Front Biosci (Landmark Ed)	2022	2022-07-22		10.31083/j.fbl2707207
33796004	Alteration of N (6) -Methyladenosine mRNA Methylation in a Rat Model of Cerebral Ischemia-Reperfusion Injury	Yi D, Wang Q, Zhao Y, Song Y, You H, Wang J, Liu R, Shi Z, Chen X, Luo Q.	Front Neurosci. 2021 Mar 16;15:605654. doi: 10.3389/fnins.2021.605654. eCollection 2021.	Yi D	Front Neurosci	2021	2021-04-02	PMC8009187	10.3389/fnins.2021.605654
34887647	Genome-wide map of N(6)-methyladenosine circular RNAs identified in mice model of severe acute pancreatitis	Wu J, Yuan XH, Jiang W, Lu YC, Huang QL, Yang Y, Qie HJ, Liu JT, Sun HY, Tang LJ.	World J Gastroenterol. 2021 Nov 21;27(43):7530-7545. doi: 10.3748/wjg.v27.i43.7530.	Wu J	World J Gastroenterol	2021	2021-12-10	PMC8613746	10.3748/wjg.v27.i43.7530
32726721	Novel insights into the roles of RNA N(6)-methyladenosine modification in regulating gene expression during environmental exposures	Li D, Zhu X, Li Y, Zeng X.	Chemosphere. 2020 Dec;261:127757. doi: 10.1016/j.chemosphere.2020.127757. Epub 2020 Jul 22.	Li D	Chemosphere	2020	2020-07-30		10.1016/j.chemosphere.2020.127757
37030526	Donor graft METTL3 gene transfer ameliorates rat liver transplantation ischemia-reperfusion injury by enhancing HO-1 expression in an m(6)A-dependent manner	Xiang S, Wang Y, Lei D, Luo Y, Peng D, Zong K, Liu Y, Huang Z, Mo S, Pu X, Zheng J, Wu Z.	Clin Immunol. 2023 Jun;251:109325. doi: 10.1016/j.clim.2023.109325. Epub 2023 Apr 6.	Xiang S	Clin Immunol	2023	2023-04-08		10.1016/j.clim.2023.109325
36672827	Identification and Validation of Three m6A Regulators: FTO, HNRNPC, and HNRNPA2B1 as Potential Biomarkers for Endometriosis	Sun J, Gan L, Sun J.	Genes (Basel). 2022 Dec 28;14(1):86. doi: 10.3390/genes14010086.	Sun J	Genes (Basel)	2022	2023-01-21	PMC9858668	10.3390/genes14010086
35127705	A Broad m6A Modification Landscape in Inflammatory Bowel Disease	Nie K, Yi J, Yang Y, Deng M, Yang Y, Wang T, Chen X, Zhang Z, Wang X.	Front Cell Dev Biol. 2022 Jan 19;9:782636. doi: 10.3389/fcell.2021.782636. eCollection 2021.	Nie K	Front Cell Dev Biol	2022	2022-02-07	PMC8809481	10.3389/fcell.2021.782636
37609036	Analysis of mRNA m(6)A modification and mRNA expression profiles in middle ear cholesteatoma	Xie S, Jin L, He J, Fu J, Yin T, Ren J, Liu W.	Front Genet. 2023 Aug 7;14:1188048. doi: 10.3389/fgene.2023.1188048. eCollection 2023.	Xie S	Front Genet	2023	2023-08-23	PMC10441234	10.3389/fgene.2023.1188048
36368640	Matr3 reshapes m6A modification complex to alleviate macrophage inflammation during atherosclerosis	Sun Z, Chen W, Wang Z, Wang S, Zan J, Zheng L, Zhao W.	Clin Immunol. 2022 Dec;245:109176. doi: 10.1016/j.clim.2022.109176. Epub 2022 Nov 8.	Sun Z	Clin Immunol	2022	2022-11-11		10.1016/j.clim.2022.109176
34537236	FTO Suppresses STAT3 Activation and Modulates Proinflammatory Interferon-Stimulated Gene Expression	McFadden MJ, Sacco MT, Murphy KA, Park M, Gokhale NS, Somfleth KY, Horner SM.	J Mol Biol. 2022 Mar 30;434(6):167247. doi: 10.1016/j.jmb.2021.167247. Epub 2021 Sep 16.	McFadden MJ	J Mol Biol	2022	2021-09-19	PMC8924017	10.1016/j.jmb.2021.167247
36992945	N(6)-methyladenosine reader YTHDF1 regulates the proliferation and migration of airway smooth muscle cells through m(6)A/cyclin D1 in asthma	Wang J, Wang L, Tian X, Luo L.	PeerJ. 2023 Mar 24;11:e14951. doi: 10.7717/peerj.14951. eCollection 2023.	Wang J	PeerJ	2023	2023-03-30	PMC10042154	10.7717/peerj.14951
37822331	The Activation of M1 Macrophages is Associated with the JNK-m6A-p38 Axis in Chronic Obstructive Pulmonary Disease	Hu T, Pang N, Li Z, Xu D, Jing J, Li F, Ding J, Wang J, Jiang M.	Int J Chron Obstruct Pulmon Dis. 2023 Oct 6;18:2195-2206. doi: 10.2147/COPD.S420471. eCollection 2023.	Hu T	Int J Chron Obstruct Pulmon Dis	2023	2023-10-12	PMC10564081	10.2147/COPD.S420471
36920524	Deficiency of WTAP in islet beta cells results in beta cell failure and diabetes in mice	Li X, Yang Y, Li Z, Wang Y, Qiao J, Chen Z.	Diabetologia. 2023 Jun;66(6):1084-1096. doi: 10.1007/s00125-023-05900-z. Epub 2023 Mar 15.	Li X	Diabetologia	2023	2023-03-15		10.1007/s00125-023-05900-z
37282488	Epigenetic combined with transcriptomic analysis of the m6A methylome after spared nerve injury-induced neuropathic pain in mice	Zeng F, Cao J, Hong Z, Lu Y, Qin Z, Tao T.	Neural Regen Res. 2023 Nov;18(11):2545-2552. doi: 10.4103/1673-5374.371374.	Zeng F	Neural Regen Res	2023	2023-06-07	PMC10360113	10.4103/1673-5374.371374
36733232	Changes in N6-methyladenosine RNA methylomes of human periodontal ligament cells in response to inflammatory conditions	Zou X, Liu C, Wu X, Yuan Z, Yan F.	J Periodontal Res. 2023 Apr;58(2):444-455. doi: 10.1111/jre.13105. Epub 2023 Feb 2.	Zou X	J Periodontal Res	2023	2023-02-03		10.1111/jre.13105
35119478	Alteration of N6-methyladenosine epitranscriptome profile in lipopolysaccharide-induced mouse mesangial cells	Liu T, Zhuang XX, Qin XJ, Wei LB, Gao JR.	Naunyn Schmiedebergs Arch Pharmacol. 2022 Apr;395(4):445-458. doi: 10.1007/s00210-022-02208-4. Epub 2022 Feb 4.	Liu T	Naunyn Schmiedebergs Arch Pharmacol	2022	2022-02-04		10.1007/s00210-022-02208-4
34899345	Roles of Major RNA Adenosine Modifications in Head and Neck Squamous Cell Carcinoma	Huo XX, Wang SJ, Song H, Li MD, Yu H, Wang M, Gong HX, Qiu XT, Zhu YF, Zhang JY.	Front Pharmacol. 2021 Nov 25;12:779779. doi: 10.3389/fphar.2021.779779. eCollection 2021.	Huo XX	Front Pharmacol	2021	2021-12-13	PMC8657411	10.3389/fphar.2021.779779
36303109	Acetaminophen changes the RNA m(6)A levels and m(6)A-related proteins expression in IL-1β-treated chondrocyte cells	Gao J, Li Y, Liu Z, Wang D, Zhang H.	BMC Mol Cell Biol. 2022 Oct 27;23(1):45. doi: 10.1186/s12860-022-00444-3.	Gao J	BMC Mol Cell Biol	2022	2022-10-28	PMC9609262	10.1186/s12860-022-00444-3
34561983	The Epigenetic Mechanisms Involved in Chronic Pain in Rodents: A Mini- Review	Xu T, Liu CC, Xin WJ.	Curr Neuropharmacol. 2022;20(6):1011-1021. doi: 10.2174/1570159X19666210924104757.	Xu T	Curr Neuropharmacol	2022	2021-09-25	PMC9886825	10.2174/1570159X19666210924104757
36595818	Prognostic and therapeutic implication of m6A methylation in Crohn disease	He Y, Hu Y, Yuan M, Xu W, Du Y, Liu J.	Medicine (Baltimore). 2022 Dec 23;101(51):e32399. doi: 10.1097/MD.0000000000032399.	He Y	Medicine (Baltimore)	2022	2023-01-03	PMC9794314	10.1097/MD.0000000000032399
37056763	N6-methyladenosine-methylomic landscape of lung tissues of mice with chronic obstructive pulmonary disease	Hu T, Xu L, Jiang M, Zhang F, Li Q, Li Z, Wu C, Ding J, Li F, Wang J.	Front Immunol. 2023 Mar 28;14:1137195. doi: 10.3389/fimmu.2023.1137195. eCollection 2023.	Hu T	Front Immunol	2023	2023-04-14	PMC10088907	10.3389/fimmu.2023.1137195
36894806	m6A methyltransferase WTAP regulates myocardial ischemia reperfusion injury through YTHDF1/FOXO3a signaling	Wang H, Fu L, Li Y, Wei L, Gu X, Li H, Li J, Wen S.	Apoptosis. 2023 Jun;28(5-6):830-839. doi: 10.1007/s10495-023-01818-4. Epub 2023 Mar 10.	Wang H	Apoptosis	2023	2023-03-09		10.1007/s10495-023-01818-4
35480861	Yes-associated protein contributes to magnesium alloy-derivedinflammation in endothelial cells	Yu H, Hou Z, Chen N, Luo R, Yang L, Miao M, Ma X, Zhou L, He F, Shen Y, Liu X, Wang Y.	Regen Biomater. 2022 Jan 20;9:rbac002. doi: 10.1093/rb/rbac002. eCollection 2022.	Yu H	Regen Biomater	2022	2022-04-28	PMC9039498	10.1093/rb/rbac002
36445237	m6A methyltransferase METTL3 inhibits endometriosis by regulating alternative splicing of MIR17HG	Li Q, Yang L, Zhang F, Liu J, Jiang M, Chen Y, Ren C.	Reproduction. 2023 Jan 6;165(2):197-208. doi: 10.1530/REP-22-0102. Print 2023 Feb 1.	Li Q	Reproduction	2023	2022-11-29		10.1530/REP-22-0102
34347395	The m6A writers regulated by the IL-6/STAT3 inflammatory pathway facilitate cancer cell stemness in cholangiocarcinoma	Ye H, Chen T, Zeng Z, He B, Yang Q, Pan Q, Chen Y, Wang W.	Cancer Biol Med. 2021 Aug 4;19(3):343-57. doi: 10.20892/j.issn.2095-3941.2020.0661. Online ahead of print.	Ye H	Cancer Biol Med	2021	2021-08-04	PMC8958887	10.20892/j.issn.2095-3941.2020.0661
35693774	METTL3-Mediated N6-Methyladenosine Modification of Trim59 mRNA Protects Against Sepsis-Induced Acute Respiratory Distress Syndrome	Chen Y, Wu Y, Zhu L, Chen C, Xu S, Tang D, Jiao Y, Yu W.	Front Immunol. 2022 May 25;13:897487. doi: 10.3389/fimmu.2022.897487. eCollection 2022.	Chen Y	Front Immunol	2022	2022-06-13	PMC9174697	10.3389/fimmu.2022.897487
34290515	The Emerging Clinical Application of m6A RNA Modification in Inflammatory Bowel Disease and Its Associated Colorectal Cancer	Xu X, Huang J, Ocansey DKW, Xia Y, Zhao Z, Xu Z, Yan Y, Zhang X, Mao F.	J Inflamm Res. 2021 Jul 15;14:3289-3306. doi: 10.2147/JIR.S320449. eCollection 2021.	Xu X	J Inflamm Res	2021	2021-07-22	PMC8289367	10.2147/JIR.S320449
34950107	Analysis of N6-Methyladenosine Methylation Modification in Fructose-Induced Non-Alcoholic Fatty Liver Disease	Luo Y, Zhang Z, Xiang L, Zhou B, Wang X, Lin Y, Ding X, Liu F, Lu Y, Peng Y.	Front Endocrinol (Lausanne). 2021 Dec 7;12:780617. doi: 10.3389/fendo.2021.780617. eCollection 2021.	Luo Y	Front Endocrinol (Lausanne)	2021	2021-12-24	PMC8688819	10.3389/fendo.2021.780617
33070685	The m6A epitranscriptome opens a new charter in immune system logic	Ma Z, Gao X, Shuai Y, Xing X, Ji J.	Epigenetics. 2021 Aug;16(8):819-837. doi: 10.1080/15592294.2020.1827722. Epub 2020 Oct 19.	Ma Z	Epigenetics	2021	2020-10-19	PMC8331015	10.1080/15592294.2020.1827722
33816290	RNA Modification of N6-Methyladenosine Predicts Immune Phenotypes and Therapeutic Opportunities in Kidney Renal Clear Cell Carcinoma	Li H, Hu J, Yu A, Othmane B, Guo T, Liu J, Cheng C, Chen J, Zu X.	Front Oncol. 2021 Mar 18;11:642159. doi: 10.3389/fonc.2021.642159. eCollection 2021.	Li H	Front Oncol	2021	2021-04-05	PMC8013979	10.3389/fonc.2021.642159
35263199	The effect of N6-methyladenosine (m6A) factors on the development of acute respiratory distress syndrome in the mouse model	Fei L, Sun G, Sun J, Wu D.	Bioengineered. 2022 Mar;13(3):7622-7634. doi: 10.1080/21655979.2022.2049473.	Fei L	Bioengineered	2022	2022-03-09	PMC8973778	10.1080/21655979.2022.2049473
37740102	Deficiency of N6-Methyladenosine Demethylase ALKBH5 Alleviates Ultraviolet B Radiation-Induced Chronic Actinic Dermatitis via Regulating Pyroptosis	He L, Liu L, Xu D, Tu Y, Yang C, Zhang M, Wang H, Nong X.	Inflammation. 2024 Feb;47(1):159-172. doi: 10.1007/s10753-023-01901-7. Epub 2023 Sep 23.	He L	Inflammation	2024	2023-09-22		10.1007/s10753-023-01901-7
36084732	FTO/RUNX2 signaling axis promotes cementoblast differentiation under normal and inflammatory condition	Sun Q, Zhao T, Li B, Li M, Luo P, Zhang C, Chen G, Cao Z, Li Y, Du M, He H.	Biochim Biophys Acta Mol Cell Res. 2022 Dec;1869(12):119358. doi: 10.1016/j.bbamcr.2022.119358. Epub 2022 Sep 7.	Sun Q	Biochim Biophys Acta Mol Cell Res	2022	2022-09-09		10.1016/j.bbamcr.2022.119358
35300330	ALKBH5-Mediated m(6)A Modification of A20 Regulates Microglia Polarization in Diabetic Retinopathy	Chen T, Zhu W, Wang C, Dong X, Yu F, Su Y, Huang J, Huo L, Wan P.	Front Immunol. 2022 Mar 1;13:813979. doi: 10.3389/fimmu.2022.813979. eCollection 2022.	Chen T	Front Immunol	2022	2022-03-18	PMC8920977	10.3389/fimmu.2022.813979
36841722	Transcriptome-wide assessment of N6-methyladenosine modification identifies different gene expression and infection-associated pathways in Treponema pallidum-infected macrophage	Li Z, Zhang L, Jiang Y, Lin X, Liao Y, Yang B, Teng M.	J Dermatol Sci. 2023 Mar;109(3):108-116. doi: 10.1016/j.jdermsci.2023.02.004. Epub 2023 Feb 19.	Li Z	J Dermatol Sci	2023	2023-02-25		10.1016/j.jdermsci.2023.02.004
36653190	USP1/UAF1-Stabilized METTL3 Promotes Reactive Astrogliosis and Improves Functional Recovery after Spinal Cord Injury through m(6)A Modification of YAP1 mRNA	Ge X, Ye W, Zhu Y, Cui M, Zhou J, Xiao C, Jiang D, Tang P, Wang J, Wang Z, Ji C, Zhou X, Cao X, Liu W, Cai W.	J Neurosci. 2023 Mar 1;43(9):1456-1474. doi: 10.1523/JNEUROSCI.1209-22.2023. Epub 2023 Jan 18.	Ge X	J Neurosci	2023	2023-01-18	PMC10008067	10.1523/JNEUROSCI.1209-22.2023
36169946	METTL3 Attenuates Inflammation in Fusarium solani-Induced Keratitis via the PI3K/AKT Signaling Pathway	Huang L, Tang H, Hu J.	Invest Ophthalmol Vis Sci. 2022 Sep 1;63(10):20. doi: 10.1167/iovs.63.10.20.	Huang L	Invest Ophthalmol Vis Sci	2022	2022-09-28	PMC9526359	10.1167/iovs.63.10.20
37271038	RHOJ as a novel mechanosensitive modulator of endothelial inflammation	Liu W, Zeng Y, Huang L, Zhang X, Bi L, Fan W, Wu G.	Biochem Biophys Res Commun. 2023 Aug 30;670:36-46. doi: 10.1016/j.bbrc.2023.05.099. Epub 2023 May 26.	Liu W	Biochem Biophys Res Commun	2023	2023-06-04		10.1016/j.bbrc.2023.05.099
35958581	A genome-wide association analysis: m6A-SNP related to the onset of oral ulcers	Wu Z, Lin W, Yuan Q, Lyu M.	Front Immunol. 2022 Jul 25;13:931408. doi: 10.3389/fimmu.2022.931408. eCollection 2022.	Wu Z	Front Immunol	2022	2022-08-12	PMC9357892	10.3389/fimmu.2022.931408
37821055	METTL3 and METTL14 regulate IL-6 expression via RNA m6A modification of zinc transporter SLC39A9 and DNA methylation of IL-6 in periodontal ligament cells	Huang J, Wang Y, Zhou Y.	Biochim Biophys Acta Mol Cell Res. 2024 Jan;1871(1):119605. doi: 10.1016/j.bbamcr.2023.119605. Epub 2023 Oct 9.	Huang J	Biochim Biophys Acta Mol Cell Res	2024	2023-10-11		10.1016/j.bbamcr.2023.119605
36878846	METTL14 promotes fibroblast-like synoviocytes activation via the LASP1/SRC/AKT axis in rheumatoid arthritis	Li X, Xu X, Zhang Q, Ling M, Li X, Tan X.	Am J Physiol Cell Physiol. 2023 May 1;324(5):C1089-C1100. doi: 10.1152/ajpcell.00575.2022. Epub 2023 Mar 6.	Li X	Am J Physiol Cell Physiol	2023	2023-03-06		10.1152/ajpcell.00575.2022
30875984	m6A Reader YTHDF2 Regulates LPS-Induced Inflammatory Response	Yu R, Li Q, Feng Z, Cai L, Xu Q.	Int J Mol Sci. 2019 Mar 15;20(6):1323. doi: 10.3390/ijms20061323.	Yu R	Int J Mol Sci	2019	2019-03-17	PMC6470741	10.3390/ijms20061323
34581943	Increased m6A-RNA methylation and FTO suppression is associated with myocardial inflammation and dysfunction during endotoxemia in mice	Dubey PK, Patil M, Singh S, Dubey S, Ahuja P, Verma SK, Krishnamurthy P.	Mol Cell Biochem. 2022 Jan;477(1):129-141. doi: 10.1007/s11010-021-04267-2. Epub 2021 Sep 28.	Dubey PK	Mol Cell Biochem	2022	2021-09-28	PMC8758538	10.1007/s11010-021-04267-2
31914601	METTL3 regulates inflammatory pain by modulating m(6)A-dependent pri-miR-365-3p processing	Zhang C, Wang Y, Peng Y, Xu H, Zhou X.	FASEB J. 2020 Jan;34(1):122-132. doi: 10.1096/fj.201901555R. Epub 2019 Nov 19.	Zhang C	FASEB J	2020	2020-01-10		10.1096/fj.201901555R
36326110	Modulation of gene expression by YTH domain family (YTHDF) proteins in human physiology and pathology	Kisan A, Chhabra R.	J Cell Physiol. 2023 Jan;238(1):5-31. doi: 10.1002/jcp.30907. Epub 2022 Nov 3.	Kisan A	J Cell Physiol	2023	2022-11-03		10.1002/jcp.30907
34880865	N6-Methyladenosine Methylation Analysis of Long Noncoding RNAs and mRNAs in IPEC-J2 Cells Treated With Clostridium perfringens beta2 Toxin	Yang J, Yang Q, Zhang J, Gao X, Luo R, Xie K, Wang W, Li J, Huang X, Yan Z, Wang P, Gun S.	Front Immunol. 2021 Nov 22;12:769204. doi: 10.3389/fimmu.2021.769204. eCollection 2021.	Yang J	Front Immunol	2021	2021-12-09	PMC8646102	10.3389/fimmu.2021.769204
36350490	Maslinic Acid Suppresses High Glucose-induced Inflammation by Epigenetically Inhibiting TXNIP Expression	Wang L, Fan YF, Li BR, Sun WH, Wang LN.	Curr Med Sci. 2022 Dec;42(6):1213-1219. doi: 10.1007/s11596-022-2657-6. Epub 2022 Nov 9.	Wang L	Curr Med Sci	2022	2022-11-09		10.1007/s11596-022-2657-6
36278233	WTAP mediates the anti-inflammatory effect of Astragalus mongholicus polysaccharide on THP-1 macrophages	Long H, Lin H, Zheng P, Hou L, Zhang M, Lin S, Yin K, Zhao G.	Front Pharmacol. 2022 Oct 7;13:1023878. doi: 10.3389/fphar.2022.1023878. eCollection 2022.	Long H	Front Pharmacol	2022	2022-10-24	PMC9585178	10.3389/fphar.2022.1023878
36649893	Transcriptome-wide m6A modification mediates cardiotoxicity in mice after chronic exposure to microplastics	Zhang M, Shi J, Deng H.	Chemosphere. 2023 Mar;317:137877. doi: 10.1016/j.chemosphere.2023.137877. Epub 2023 Jan 14.	Zhang M	Chemosphere	2023	2023-01-17		10.1016/j.chemosphere.2023.137877
33580473	Genome-Wide Detection of m(6)A-Associated Genetic Polymorphisms Associated with Ischemic Stroke	Zhu R, Tian D, Zhao Y, Zhang C, Liu X.	J Mol Neurosci. 2021 Oct;71(10):2107-2115. doi: 10.1007/s12031-021-01805-x. Epub 2021 Feb 12.	Zhu R	J Mol Neurosci	2021	2021-02-13		10.1007/s12031-021-01805-x
36845072	Osthole regulates N6-methyladenosine-modified TGM2 to inhibit the progression of rheumatoid arthritis and associated interstitial lung disease	Lin X, Chen J, Tao C, Luo L, He J, Wang Q.	MedComm (2020). 2023 Feb 22;4(2):e219. doi: 10.1002/mco2.219. eCollection 2023 Apr.	Lin X	MedComm (2020)	2023	2023-02-27	PMC9945862	10.1002/mco2.219
36465909	The potential role of RNA N6-methyladenosine in primary Sjögren's syndrome	Xiao Q, Wu X, Deng C, Zhao L, Peng L, Zhou J, Zhang W, Zhao Y, Fei Y.	Front Med (Lausanne). 2022 Nov 16;9:959388. doi: 10.3389/fmed.2022.959388. eCollection 2022.	Xiao Q	Front Med (Lausanne)	2022	2022-12-05	PMC9710536	10.3389/fmed.2022.959388
35196365	Correlation analysis of m6A-modified regulators with immune microenvironment infiltrating cells in lung adenocarcinoma	Ye W, Huang T.	PLoS One. 2022 Feb 23;17(2):e0264384. doi: 10.1371/journal.pone.0264384. eCollection 2022.	Ye W	PLoS One	2022	2022-02-23	PMC8865675	10.1371/journal.pone.0264384
31892163	METTL3 Regulates Osteoblast Differentiation and Inflammatory Response via Smad Signaling and MAPK Signaling	Zhang Y, Gu X, Li D, Cai L, Xu Q.	Int J Mol Sci. 2019 Dec 27;21(1):199. doi: 10.3390/ijms21010199.	Zhang Y	Int J Mol Sci	2019	2020-01-02	PMC6981640	10.3390/ijms21010199
37925018	Hepatic Transcriptome and Its Regulation Following Soluble Epoxide Hydrolase Inhibition in Alcohol-Associated Liver Disease	Warner JB, Hardesty JE, Song YL, Floyd AT, Deng Z, Jebet A, He L, Zhang X, McClain CJ, Hammock BD, Warner DR, Kirpich IA.	Am J Pathol. 2024 Jan;194(1):71-84. doi: 10.1016/j.ajpath.2023.09.016. Epub 2023 Nov 3.	Warner JB	Am J Pathol	2024	2023-11-04	PMC10768534	10.1016/j.ajpath.2023.09.016
36047973	Comprehensive analyses of N(6) -methyladenosine-related long noncoding RNA profiles with prognosis, chemotherapy response, and immune landscape in small cell lung cancer	Luo Y, Zhang Z, Zheng B, Wu P, Zhang G, Wang L, Zeng Q, Yang Z, Xue L, Zeng H, Tan F, Xue Q, Gao S, Sun N, He J.	Cancer Sci. 2022 Dec;113(12):4289-4299. doi: 10.1111/cas.15553. Epub 2022 Sep 15.	Luo Y	Cancer Sci	2022	2022-09-01	PMC9746037	10.1111/cas.15553
37024440	Blocking CCR10 Expression Activates m6A Methylation and Alleviates Vascular Endothelial Cell Injury	Zhou Z, Yang H, Wang X, Yi L.	Discov Med. 2023 Feb 1;35(174):36-44. doi: 10.24976/Discov.Med.202335174.5.	Zhou Z	Discov Med	2023	2023-04-06		10.24976/Discov.Med.202335174.5
37494067	Modulating the m6A Modified Transcription Factor GATA6 Impacts Epithelial Cytokines in Acute Lung Injury	Jin A, Li L, Zhao Y, Li M, Zhang S, Chen J, Li Y, Huang L, Ren H, Lu S, Yang X, Sun Q.	Am J Respir Cell Mol Biol. 2023 Nov;69(5):521-532. doi: 10.1165/rcmb.2022-0243OC.	Jin A	Am J Respir Cell Mol Biol	2023	2023-07-26		10.1165/rcmb.2022-0243OC
36172147	FTO promotes liver inflammation by suppressing m6A mRNA methylation of IL-17RA	Gan X, Dai Z, Ge C, Yin H, Wang Y, Tan J, Sun S, Zhou W, Yuan S, Yang F.	Front Oncol. 2022 Sep 12;12:989353. doi: 10.3389/fonc.2022.989353. eCollection 2022.	Gan X	Front Oncol	2022	2022-09-29	PMC9511030	10.3389/fonc.2022.989353
37091123	Exploring m6A-RNA methylation as a potential therapeutic strategy for acute lung injury and acute respiratory distress syndrome	Faraj R, Liang Y, Feng A, Wu J, Black SM, Wang T.	Pulm Circ. 2023 Apr 1;13(2):e12230. doi: 10.1002/pul2.12230. eCollection 2023 Apr.	Faraj R	Pulm Circ	2023	2023-04-24	PMC10119488	10.1002/pul2.12230
36267414	Identification and verification of IGFBP3 and YTHDC1 as biomarkers associated with immune infiltration and mitophagy in hypertrophic cardiomyopathy	Li Y, Zhang W, Dai Y, Chen K.	Front Genet. 2022 Oct 4;13:986995. doi: 10.3389/fgene.2022.986995. eCollection 2022.	Li Y	Front Genet	2022	2022-10-21	PMC9577180	10.3389/fgene.2022.986995
35178386	Analysis of m6A Methylation Modification Patterns and Tumor Immune Microenvironment in Breast Cancer	Dong M, Shen W, Yang G, Yang Z, Li X.	Front Cell Dev Biol. 2022 Feb 1;10:785058. doi: 10.3389/fcell.2022.785058. eCollection 2022.	Dong M	Front Cell Dev Biol	2022	2022-02-18	PMC8846385	10.3389/fcell.2022.785058
35734168	m6A-Regulator Expression Signatures Identify a Subset of Follicular Lymphoma Harboring an Exhausted Tumor Microenvironment	Zhang T, Liu H, Gao F, Gong W, Cui Y, He J, Li L, Qiu L, Qian Z, Zhou S, Meng B, Ren X, Zhang H, Wang X.	Front Immunol. 2022 Jun 6;13:922471. doi: 10.3389/fimmu.2022.922471. eCollection 2022.	Zhang T	Front Immunol	2022	2022-06-23	PMC9207509	10.3389/fimmu.2022.922471
34130310	Methyltransferase-like 3 contributes to inflammatory pain by targeting TET1 in YTHDF2-dependent manner	Pan Z, Zhang Q, Liu X, Zhou H, Jin T, Hao LY, Xie L, Zhang M, Yang XX, Sun ML, Xue ZY, Tao Y, Ye XC, Shen W, Cao JL.	Pain. 2021 Jul 1;162(7):1960-1976. doi: 10.1097/j.pain.0000000000002218.	Pan Z	Pain	2021	2021-06-15		10.1097/j.pain.0000000000002218
34966539	Influence of N6-Methyladenosine Modification Gene HNRNPC on Cell Phenotype in Parkinson's Disease	Quan W, Li J, Liu L, Zhang Q, Qin Y, Pei X, Chen J.	Parkinsons Dis. 2021 Dec 20;2021:9919129. doi: 10.1155/2021/9919129. eCollection 2021.	Quan W	Parkinsons Dis	2021	2021-12-30	PMC8712163	10.1155/2021/9919129
34869371	Novel Insights Into the Potential Mechanisms of N6-Methyladenosine RNA Modification on Sepsis-Induced Cardiovascular Dysfunction: An Update Summary on Direct and Indirect Evidences	Wang Y, Xu M, Yue P, Zhang D, Tong J, Li Y.	Front Cell Dev Biol. 2021 Nov 12;9:772921. doi: 10.3389/fcell.2021.772921. eCollection 2021.	Wang Y	Front Cell Dev Biol	2021	2021-12-06	PMC8633316	10.3389/fcell.2021.772921
35281520	Application of m(6)A and TME in Predicting the Prognosis and Treatment of Clear Cell Renal Cell Carcinoma	Pei D, Xu C, Wang D, Shi X, Zhang Y, Liu Y, Liu N, Guo J, Yu Y, Kang Z, Zhu H.	J Oncol. 2022 Mar 4;2022:2910491. doi: 10.1155/2022/2910491. eCollection 2022.	Pei D	J Oncol	2022	2022-03-14	PMC8916893	10.1155/2022/2910491
34375639	The m(6)A methyltransferase METTL3 modifies PGC-1α mRNA promoting mitochondrial dysfunction and oxLDL-induced inflammation in monocytes	Zhang X, Li X, Jia H, An G, Ni J.	J Biol Chem. 2021 Sep;297(3):101058. doi: 10.1016/j.jbc.2021.101058. Epub 2021 Aug 8.	Zhang X	J Biol Chem	2021	2021-08-10	PMC8406003	10.1016/j.jbc.2021.101058
32828308	Zbtb7b suppresses aseptic inflammation by regulating m(6)A modification of IL6 mRNA	Zhao J, Han DX, Wang CB, Wang XL.	Biochem Biophys Res Commun. 2020 Sep 10;530(1):336-341. doi: 10.1016/j.bbrc.2020.07.011. Epub 2020 Aug 6.	Zhao J	Biochem Biophys Res Commun	2020	2020-08-24		10.1016/j.bbrc.2020.07.011
34310344	Integrated analysis of m(6)A mRNA methylation in rats with monocrotaline-induced pulmonary arterial hypertension	Zeng Y, Huang T, Zuo W, Wang D, Xie Y, Wang X, Xiao Z, Chen Z, Liu Q, Liu N, Xiao Y.	Aging (Albany NY). 2021 Jul 26;13(14):18238-18256. doi: 10.18632/aging.203230. Epub 2021 Jul 26.	Zeng Y	Aging (Albany NY)	2021	2021-07-26	PMC8351682	10.18632/aging.203230
37625827	RBM15-Mediated m6A Modification of K17 Affects Keratinocytes Response to IL-17A Stimulation in Psoriasis	Fu M, Zhou B, Shi N, Dong R, Chen Y.	Ann Clin Lab Sci. 2023 Jul;53(4):529-538.	Fu M	Ann Clin Lab Sci	2023	2023-08-25
33156926	The mRNA m6A reader YTHDF2 suppresses proinflammatory pathways and sustains hematopoietic stem cell function	Mapperley C, van de Lagemaat LN, Lawson H, Tavosanis A, Paris J, Campos J, Wotherspoon D, Durko J, Sarapuu A, Choe J, Ivanova I, Krause DS, von Kriegsheim A, Much C, Morgan M, Gregory RI, Mead AJ, O'Carroll D, Kranc KR.	J Exp Med. 2021 Mar 1;218(3):e20200829. doi: 10.1084/jem.20200829.	Mapperley C	J Exp Med	2021	2020-11-06	PMC7653684	10.1084/jem.20200829
34301919	RBM15-mediated N6-methyladenosine modification affects COVID-19 severity by regulating the expression of multitarget genes	Meng Y, Zhang Q, Wang K, Zhang X, Yang R, Bi K, Chen W, Diao H.	Cell Death Dis. 2021 Jul 23;12(8):732. doi: 10.1038/s41419-021-04012-z.	Meng Y	Cell Death Dis	2021	2021-07-24	PMC8298984	10.1038/s41419-021-04012-z
38157273	Immunotoxicity Evaluation of Trihalophenolic Disinfection By-Products in Mouse and Human Mononuclear Macrophage Systems: The Role of RNA Epitranscriptomic Modification in Mammalian Immunity	Qin M, Huang L, Li M, Shao T, Zhang J, Jiang X, Shao C, Zhao C, Pan Y, Zhou Q, Wang Y, Liu XM, Qiu J.	Environ Health Perspect. 2023 Dec;131(12):127023. doi: 10.1289/EHP11329. Epub 2023 Dec 29.	Qin M	Environ Health Perspect	2023	2023-12-29	PMC10756339	10.1289/EHP11329
36625590	N(6)-Methyladenosine and Reader Protein YTHDF2 Enhance the Innate Immune Response by Mediating DUSP1 mRNA Degradation and Activating Mitogen-Activated Protein Kinases during Bacterial and Viral Infections	Feng J, Meng W, Chen L, Zhang X, Markazi A, Yuan W, Huang Y, Gao SJ.	mBio. 2023 Feb 28;14(1):e0334922. doi: 10.1128/mbio.03349-22. Epub 2023 Jan 10.	Feng J	mBio	2023	2023-01-10	PMC9973302	10.1128/mbio.03349-22
36877222	SILENCING M 6 A READER YTHDC1 REDUCES INFLAMMATORY RESPONSE IN SEPSIS-INDUCED CARDIOMYOPATHY BY INHIBITING SERPINA3N EXPRESSION	Xie W, Zhang A, Huang X, Zhou H, Ying H, Ye C, Ren M, Qian M, Liu X, Mo Y.	Shock. 2023 May 1;59(5):791-802. doi: 10.1097/SHK.0000000000002106. Epub 2023 Mar 7.	Xie W	Shock	2023	2023-03-06		10.1097/SHK.0000000000002106
37437661	Dysregulated m6A methylation modification is associated with human peri-implantitis - A pilot study	Krishnamoorthy HS, Kannan B, Ganapathy D, Jayaseelan VP, Arumugam P.	J Stomatol Oral Maxillofac Surg. 2023 Dec;124(6S):101550. doi: 10.1016/j.jormas.2023.101550. Epub 2023 Jul 10.	Krishnamoorthy HS	J Stomatol Oral Maxillofac Surg	2023	2023-07-12		10.1016/j.jormas.2023.101550
34728144	'(m(6))A' stands for 'autoimmunity': reading, writing, and erasing RNA modifications during inflammation	Bechara R, Gaffen SL.	Trends Immunol. 2021 Dec;42(12):1073-1076. doi: 10.1016/j.it.2021.10.002. Epub 2021 Oct 30.	Bechara R	Trends Immunol	2021	2021-11-03	PMC9393025	10.1016/j.it.2021.10.002
35023630	Characterization of m6A regulator-mediated methylation modification patterns and tumor microenvironment infiltration in acute myeloid leukemia	Han S, Qi J, Fang K, Wang H, Tang Y, Wu D, Han Y.	Cancer Med. 2022 Mar;11(5):1413-1426. doi: 10.1002/cam4.4531. Epub 2022 Jan 13.	Han S	Cancer Med	2022	2022-01-13	PMC8894699	10.1002/cam4.4531
36700958	The potential role of N6-methyladenosine modification of LncRNAs in contributing to the pathogenesis of chronic glomerulonephritis	Liu T, Zhuang XX, Qin XJ, Wei LB, Gao JR.	Inflamm Res. 2023 Mar;72(3):623-638. doi: 10.1007/s00011-023-01695-2. Epub 2023 Jan 26.	Liu T	Inflamm Res	2023	2023-01-26		10.1007/s00011-023-01695-2
35795532	Immune Infiltration of Ulcerative Colitis and Detection of the m6A Subtype	Gu C, Wu J, Zhang W, Yao Y, Yan W, Yuan Y, Wang W, Shang A.	J Immunol Res. 2022 Jun 25;2022:7280977. doi: 10.1155/2022/7280977. eCollection 2022.	Gu C	J Immunol Res	2022	2022-07-07	PMC9252851	10.1155/2022/7280977
34966133	Metabolic dysfunction-associated fatty liver disease: advances in genetic and epigenetic implications	Pirola CJ, Sookoian S.	Curr Opin Lipidol. 2022 Apr 1;33(2):95-102. doi: 10.1097/MOL.0000000000000814.	Pirola CJ	Curr Opin Lipidol	2022	2021-12-30		10.1097/MOL.0000000000000814
36330380	Comprehensive Analysis and Functional Characteristics of Differential Expression of N6-Methyladenosine Methylation Modification in the Whole Transcriptome of Rheumatoid Arthritis	Wan L, Liu J, Huang C, Zhu Z, Wang K, Sun G, Zhu L, Hu Z.	Mediators Inflamm. 2022 Oct 25;2022:4766992. doi: 10.1155/2022/4766992. eCollection 2022.	Wan L	Mediators Inflamm	2022	2022-11-04	PMC9626244	10.1155/2022/4766992
34603397	Integrative Analysis Reveals Potentially Functional N6-Methylandenosine-Related Long Noncoding RNAs in Colon Adenocarcinoma	Tan X, Li Q, Zhang Q, Fan G, Liu Z, Zhou K.	Front Genet. 2021 Sep 17;12:739344. doi: 10.3389/fgene.2021.739344. eCollection 2021.	Tan X	Front Genet	2021	2021-10-04	PMC8484874	10.3389/fgene.2021.739344
34758326	m(6)A mRNA methylation-directed myeloid cell activation controls progression of NAFLD and obesity	Qin Y, Li B, Arumugam S, Lu Q, Mankash SM, Li J, Sun B, Li J, Flavell RA, Li HB, Ouyang X.	Cell Rep. 2021 Nov 9;37(6):109968. doi: 10.1016/j.celrep.2021.109968.	Qin Y	Cell Rep	2021	2021-11-10	PMC8667589	10.1016/j.celrep.2021.109968
30653517	Epitranscriptomics: Correlation of N6-methyladenosine RNA methylation and pathway dysregulation in the hippocampus of HIV transgenic rats	Fu Y, Zorman B, Sumazin P, Sanna PP, Repunte-Canonigo V.	PLoS One. 2019 Jan 17;14(1):e0203566. doi: 10.1371/journal.pone.0203566. eCollection 2019.	Fu Y	PLoS One	2019	2019-01-18	PMC6336335	10.1371/journal.pone.0203566
34599880	METTL3 Regulates Liver Homeostasis, Hepatocyte Ploidy, and Circadian Rhythm-Controlled Gene Expression in Mice	Barajas JM, Lin CH, Sun HL, Alencastro F, Zhu AC, Aljuhani M, Navari L, Yilmaz SA, Yu L, Corps K, He C, Duncan AW, Ghoshal K.	Am J Pathol. 2022 Jan;192(1):56-71. doi: 10.1016/j.ajpath.2021.09.005. Epub 2021 Sep 29.	Barajas JM	Am J Pathol	2022	2021-10-02	PMC8759040	10.1016/j.ajpath.2021.09.005
34709120	N6-methyladenosine reader YTH N6-methyladenosine RNA binding protein 3 or insulin like growth factor 2 mRNA binding protein 2 knockdown protects human bronchial epithelial cells from hypoxia/reoxygenation injury by inactivating p38 MAPK, AKT, ERK1/2, and NF-κB pathways	Xiao K, Liu P, Yan P, Liu Y, Song L, Liu Y, Xie L.	Bioengineered. 2022 May;13(5):11973-11986. doi: 10.1080/21655979.2021.1999550.	Xiao K	Bioengineered	2022	2021-10-28	PMC9211071	10.1080/21655979.2021.1999550
38027859	Global m6A methylation and gene expression patterns in human microglial HMC3 cells infected with HIV-1	Peng Q, Qiao J, Li W, You Q, Hu S, Liu Y, Liu W, Hu K, Sun B.	Heliyon. 2023 Oct 26;9(11):e21307. doi: 10.1016/j.heliyon.2023.e21307. eCollection 2023 Nov.	Peng Q	Heliyon	2023	2023-11-29	PMC10643106	10.1016/j.heliyon.2023.e21307
36555481	METTL3 Regulates the Inflammatory Response in CPB2 Toxin-Exposed IPEC-J2 Cells through the TLR2/NF-κB Signaling Pathway	Zhang J, Yang J, Gao X, Huang X, Luo R, Yang Q, Yan Z, Wang P, Wang W, Xie K, Li J, Zhang B, Gun S.	Int J Mol Sci. 2022 Dec 13;23(24):15833. doi: 10.3390/ijms232415833.	Zhang J	Int J Mol Sci	2022	2022-12-23	PMC9781724	10.3390/ijms232415833
34036843	Could partial nonstarch polysaccharides ameliorate cancer by altering m(6)A RNA methylation in hosts through intestinal microbiota?	Luo J, Yu J, Peng X.	Crit Rev Food Sci Nutr. 2022;62(30):8319-8334. doi: 10.1080/10408398.2021.1927975. Epub 2021 May 26.	Luo J	Crit Rev Food Sci Nutr	2022	2021-05-26		10.1080/10408398.2021.1927975
36582238	Diagnostic gene signatures and aberrant pathway activation based on m6A methylation regulators in rheumatoid arthritis	Geng Q, Cao X, Fan D, Gu X, Zhang Q, Zhang M, Wang Z, Deng T, Xiao C.	Front Immunol. 2022 Dec 13;13:1041284. doi: 10.3389/fimmu.2022.1041284. eCollection 2022.	Geng Q	Front Immunol	2022	2022-12-30	PMC9793088	10.3389/fimmu.2022.1041284
35676619	Identification and validation of a seven m6A-related lncRNAs signature predicting prognosis of ovarian cancer	Song Y, Qu H.	BMC Cancer. 2022 Jun 8;22(1):633. doi: 10.1186/s12885-022-09591-4.	Song Y	BMC Cancer	2022	2022-06-08	PMC9178823	10.1186/s12885-022-09591-4
34044094	ALKBH5-Modified HMGB1-STING Activation Contributes to Radiation Induced Liver Disease via Innate Immune Response	Chen G, Zhao Q, Yuan B, Wang B, Zhang Y, Li Z, Du S, Zeng Z.	Int J Radiat Oncol Biol Phys. 2021 Oct 1;111(2):491-501. doi: 10.1016/j.ijrobp.2021.05.115. Epub 2021 May 24.	Chen G	Int J Radiat Oncol Biol Phys	2021	2021-05-27		10.1016/j.ijrobp.2021.05.115
34530171	Mettl3 inhibits the apoptosis and autophagy of chondrocytes in inflammation through mediating Bcl2 stability via Ythdf1-mediated m(6)A modification	He Y, Wang W, Xu X, Yang B, Yu X, Wu Y, Wang J.	Bone. 2022 Jan;154:116182. doi: 10.1016/j.bone.2021.116182. Epub 2021 Sep 13.	He Y	Bone	2022	2021-09-16		10.1016/j.bone.2021.116182
38147784	YTHDF2 alleviates microglia activation via promoting circHIPK2 degradation	Huang R, Sun M, Wang W, Yu X, Liu F.	J Neuroimmunol. 2024 Feb 15;387:578265. doi: 10.1016/j.jneuroim.2023.578265. Epub 2023 Dec 19.	Huang R	J Neuroimmunol	2024	2023-12-26		10.1016/j.jneuroim.2023.578265
35804542	FTO Regulates Apoptosis in CPB2-Treated IPEC-J2 Cells by Targeting Caspase 3 Apoptotic Protein	Yang J, Zhang J, Gao X, Luo R, Xie K, Wang W, Li J, Yang Q, Huang X, Yan Z, Wang P, Gun S.	Animals (Basel). 2022 Jun 26;12(13):1644. doi: 10.3390/ani12131644.	Yang J	Animals (Basel)	2022	2022-07-09	PMC9264887	10.3390/ani12131644
33292635	The critical role of m(6)A methylation in the pathogenesis of Graves' ophthalmopathy	Zhu L, Li S, He S, Tong Q, Wang L, Li X, Wu X, Meng Q, Jin E, Zhang C, Li T, Xu N, Huang L, Wang Y, Zhao M.	Eye Vis (Lond). 2020 Dec 1;7(1):55. doi: 10.1186/s40662-020-00221-3.	Zhu L	Eye Vis (Lond)	2020	2020-12-09	PMC7708247	10.1186/s40662-020-00221-3
34507301	Genome-wide identification of altered RNA m(6)A profiles in vascular tissue of septic rats	Shen ZJ, Han YC, Nie MW, Wang YN, Xiang RL, Xie HZ.	Aging (Albany NY). 2021 Sep 10;13(17):21610-21627. doi: 10.18632/aging.203506. Epub 2021 Sep 10.	Shen ZJ	Aging (Albany NY)	2021	2021-09-10	PMC8457599	10.18632/aging.203506
36544487	Diagnostic signature, subtype classification, and immune infiltration of key m6A regulators in osteomyelitis patients	Shi X, Ni H, Wu Y, Guo M, Wang B, Zhang Y, Zhang B, Xu Y.	Front Genet. 2022 Dec 5;13:1044264. doi: 10.3389/fgene.2022.1044264. eCollection 2022.	Shi X	Front Genet	2022	2022-12-22	PMC9760713	10.3389/fgene.2022.1044264
38004176	Effects of Methionine Restriction from Different Sources on Sperm Quality in Aging Mice	Wu Y, Li H, Miao Y, Peng J, Wei H.	Nutrients. 2023 Nov 15;15(22):4782. doi: 10.3390/nu15224782.	Wu Y	Nutrients	2023	2023-11-25	PMC10675477	10.3390/nu15224782
36541909	Role of m6A modification and novel circ_0066715/ miR-486-5p/ ETS1 axis in rheumatoid arthritis macrophage polarization progression	Wan L, Liu J, Huang C, Zhu Z, Li F, Sun G, Wang K, Li S, Ma X, Chen X, Yuan W.	Aging (Albany NY). 2022 Dec 20;14(24):10009-10026. doi: 10.18632/aging.204439. Epub 2022 Dec 20.	Wan L	Aging (Albany NY)	2022	2022-12-21	PMC9831719	10.18632/aging.204439
36250525	Chronic allergic asthma alters m6A epitranscriptomic tagging of mRNAs and lncRNAs in the lung	Ni X, Li X, Hu B, Wang L.	Biosci Rep. 2022 Dec 22;42(12):BSR20221395. doi: 10.1042/BSR20221395.	Ni X	Biosci Rep	2022	2022-10-17	PMC9744720	10.1042/BSR20221395
35421547	m6A echoes with DNA methylation: Coordinated DNA methylation and gene expression data analysis identified critical m6A genes associated with asthma	Mo BW, Li XM, Li SM, Xiao B, Yang J, Li HM.	Gene. 2022 Jun 20;828:146457. doi: 10.1016/j.gene.2022.146457. Epub 2022 Apr 11.	Mo BW	Gene	2022	2022-04-14		10.1016/j.gene.2022.146457
37651650	Impacts and potential mechanisms of fine particulate matter (PM(2.5)) on male testosterone biosynthesis disruption	Zheng S, Zhao N, Lin X, Qiu L.	Rev Environ Health. 2023 Sep 1. doi: 10.1515/reveh-2023-0064. Online ahead of print.	Zheng S	Rev Environ Health	2023	2023-08-31		10.1515/reveh-2023-0064
35706691	Transcriptome-Wide N6-Methyladenosine Methylome Alteration in the Rat Spinal Cord After Acute Traumatic Spinal Cord Injury	Yu J, Chen H, Ma H, Zhang Z, Zhu X, Wang P, Liu R, Jin X, Zhao Y.	Front Neurosci. 2022 May 30;16:848119. doi: 10.3389/fnins.2022.848119. eCollection 2022.	Yu J	Front Neurosci	2022	2022-06-16	PMC9189298	10.3389/fnins.2022.848119
36824909	Redox Regulation of m (6) A Methyltransferase METTL3 in Human β-cells Controls the Innate Immune Response in Type 1 Diabetes	De Jesus DF, Zhang Z, Brown NK, Li X, Gaffrey MJ, Kahraman S, Wei J, Hu J, Basile G, Xiao L, Rana TM, Mathews C, Powers AC, Atkinson MA, Eizirik DL, Dhe-Paganon S, Parent AV, Qian WJ, He C, Kulkarni RN.	bioRxiv [Preprint]. 2023 Feb 16:2023.02.16.528701. doi: 10.1101/2023.02.16.528701.	De Jesus DF	bioRxiv	2023	2023-02-24	PMC9948953	10.1101/2023.02.16.528701
32802200	Roles of long non-coding RNAs and emerging RNA-binding proteins in innate antiviral responses	Wang Y, Wang Y, Luo W, Song X, Huang L, Xiao J, Jin F, Ren Z, Wang Y.	Theranostics. 2020 Jul 23;10(20):9407-9424. doi: 10.7150/thno.48520. eCollection 2020.	Wang Y	Theranostics	2020	2020-08-18	PMC7415804	10.7150/thno.48520
36503445	Use of Novel m6A Regulator-mediated Methylation Modification Patterns in Distinct Tumor Microenvironment Profiles to Identify and Predict Glioma Prognosis and Progression, T-cell Dysfunction, and Clinical Response to ICI Immunotherapy	Zhao B, Xiang Z, Wu B, Zhang X, Feng N, Wei Y, Zhang W.	Curr Pharm Des. 2023;29(1):60-78. doi: 10.2174/1381612829666221207112438.	Zhao B	Curr Pharm Des	2023	2022-12-12		10.2174/1381612829666221207112438
35035657	Methylation Pattern Mediated by m(6)A Regulator and Tumor Microenvironment Invasion in Lung Adenocarcinoma	Jiang F, Hu Y, Liu X, Wang M, Wu C.	Oxid Med Cell Longev. 2022 Jan 5;2022:2930310. doi: 10.1155/2022/2930310. eCollection 2022.	Jiang F	Oxid Med Cell Longev	2022	2022-01-17	PMC8756160	10.1155/2022/2930310
34968289	Implication of m6A mRNA Methylation in Susceptibility to Inflammatory Bowel Disease	Sebastian-delaCruz M, Olazagoitia-Garmendia A, Gonzalez-Moro I, Santin I, Garcia-Etxebarria K, Castellanos-Rubio A.	Epigenomes. 2020 Aug 3;4(3):16. doi: 10.3390/epigenomes4030016.	Sebastian-delaCruz M	Epigenomes	2020	2021-12-30	PMC8594712	10.3390/epigenomes4030016
36290677	M(6)A RNA Methylation Mediates NOD1/NF-kB Signaling Activation in the Liver of Piglets Challenged with Lipopolysaccharide	Xu M, Zhuo R, Tao S, Liang Y, Liu C, Liu Q, Wang T, Zhong X.	Antioxidants (Basel). 2022 Sep 30;11(10):1954. doi: 10.3390/antiox11101954.	Xu M	Antioxidants (Basel)	2022	2022-10-27	PMC9598714	10.3390/antiox11101954
35347085	Maslinic acid protects against pressure-overload-induced cardiac hypertrophy by blocking METTL3-mediated m(6)A methylation	Fang M, Deng J, Zhou Q, Hu Z, Yang L.	Aging (Albany NY). 2022 Mar 28;14(6):2548-2557. doi: 10.18632/aging.203860. Epub 2022 Mar 28.	Fang M	Aging (Albany NY)	2022	2022-03-29	PMC9004583	10.18632/aging.203860
33741902	N6-methyladenosine modification of circCUX1 confers radioresistance of hypopharyngeal squamous cell carcinoma through caspase1 pathway	Wu P, Fang X, Liu Y, Tang Y, Wang W, Li X, Fan Y.	Cell Death Dis. 2021 Mar 19;12(4):298. doi: 10.1038/s41419-021-03558-2.	Wu P	Cell Death Dis	2021	2021-03-20	PMC7979824	10.1038/s41419-021-03558-2
34295905	METTL3 Promotes Activation and Inflammation of FLSs Through the NF-κB Signaling Pathway in Rheumatoid Arthritis	Shi W, Zheng Y, Luo S, Li X, Zhang Y, Meng X, Huang C, Li J.	Front Med (Lausanne). 2021 Jul 6;8:607585. doi: 10.3389/fmed.2021.607585. eCollection 2021.	Shi W	Front Med (Lausanne)	2021	2021-07-23	PMC8290917	10.3389/fmed.2021.607585
36302453	Downregulation of the m(6)A reader protein YTHDC1 leads to islet β-cell failure and diabetes	Li X, Yang Y, Chen Z.	Metabolism. 2023 Jan;138:155339. doi: 10.1016/j.metabol.2022.155339. Epub 2022 Oct 24.	Li X	Metabolism	2023	2022-10-27		10.1016/j.metabol.2022.155339
36941720	DNER and GNL2 are differentially m6A methylated in periodontitis in comparison with periodontal health revealed by m6A microarray of human gingival tissue and transcriptomic analysis	Wang Z, Chen H, Peng L, He Y, Wei J, Zhang X.	J Periodontal Res. 2023 Jun;58(3):529-543. doi: 10.1111/jre.13117. Epub 2023 Mar 20.	Wang Z	J Periodontal Res	2023	2023-03-21		10.1111/jre.13117
35758042	Ibuprofen promotes p75 neurotrophin receptor expression through modifying promoter methylation and N6-methyladenosine-RNA-methylation in human gastric cancer cells	Jin H, Wu Z, Tan B, Liu Z, Zu Z, Wu X, Bi Y, Hu X.	Bioengineered. 2022 Jun;13(6):14595-14604. doi: 10.1080/21655979.2022.2092674.	Jin H	Bioengineered	2022	2022-06-27	PMC9342148	10.1080/21655979.2022.2092674
35168108	Macrophage M1 regulatory diabetic nephropathy is mediated by m6A methylation modification of lncRNA expression	Li C, Su F, Liang Z, Zhang L, Liu F, Fan W, Li Z.	Mol Immunol. 2022 Apr;144:16-25. doi: 10.1016/j.molimm.2022.02.008. Epub 2022 Feb 12.	Li C	Mol Immunol	2022	2022-02-15		10.1016/j.molimm.2022.02.008
38135832	Identification of Key Genes Mediated by N6-Methyladenosine Methyltransferase METTL3 in Ischemic Stroke via Bioinformatics Analysis and Experiments	Liang T, Zhu L, Yang J, Huang X, Lv M, Liu S, Wen Z, Su L, Zhou L.	Mol Biotechnol. 2023 Dec 22. doi: 10.1007/s12033-023-00991-w. Online ahead of print.	Liang T	Mol Biotechnol	2023	2023-12-22		10.1007/s12033-023-00991-w
32123532	GNAS promotes inflammation-related hepatocellular carcinoma progression by promoting STAT3 activation	Ding H, Zhang X, Su Y, Jia C, Dai C.	Cell Mol Biol Lett. 2020 Feb 24;25:8. doi: 10.1186/s11658-020-00204-1. eCollection 2020.	Ding H	Cell Mol Biol Lett	2020	2020-03-04	PMC7038622	10.1186/s11658-020-00204-1
36675811	Severe Burn Injury Significantly Alters the Gene Expression and m6A Methylation Tagging of mRNAs and lncRNAs in Human Skin	Ran Y, Yan Z, Huang M, Zhou S, Wu F, Wang M, Yang S, Zhang P, Huang X, Jiang B, Liang P.	J Pers Med. 2023 Jan 12;13(1):150. doi: 10.3390/jpm13010150.	Ran Y	J Pers Med	2023	2023-01-21	PMC9864918	10.3390/jpm13010150
37434186	Comprehensive analysis of m(6)A regulators characterized by the immune microenvironment in Duchenne muscular dystrophy	Han X, Ji G, Wang N, Yi L, Mao Y, Deng J, Wu H, Ma S, Han J, Bu Y, Fang P, Liu J, Sun F, Song X.	J Transl Med. 2023 Jul 11;21(1):459. doi: 10.1186/s12967-023-04301-5.	Han X	J Transl Med	2023	2023-07-11	PMC10334523	10.1186/s12967-023-04301-5
37275442	Mettl3 Mediated m6A Methylation Involved in Epithelial-Mesenchymal Transition by Targeting SOCS3/STAT3/SNAI1 in Cigarette Smoking-Induced COPD	Zhang Y, Wang L, Yan F, Yang M, Gao H, Zeng Y.	Int J Chron Obstruct Pulmon Dis. 2023 May 30;18:1007-1017. doi: 10.2147/COPD.S398289. eCollection 2023.	Zhang Y	Int J Chron Obstruct Pulmon Dis	2023	2023-06-05	PMC10239240	10.2147/COPD.S398289
35718042	Methyltransferase-like 3 leads to lung injury by up-regulation of interleukin 24 through N6-methyladenosine-dependent mRNA stability and translation efficiency in mice exposed to fine particulate matter 2.5	He X, Zhang L, Liu S, Wang J, Liu Y, Xiong A, Jiang M, Luo L, Ying X, Li G.	Environ Pollut. 2022 Sep 1;308:119607. doi: 10.1016/j.envpol.2022.119607. Epub 2022 Jun 16.	He X	Environ Pollut	2022	2022-06-19		10.1016/j.envpol.2022.119607
34150845	Pan-Cancer Prognostic, Immunity, Stemness, and Anticancer Drug Sensitivity Characterization of N6-Methyladenosine RNA Modification Regulators in Human Cancers	Li R, Yin YH, Ji XL, Liu X, Li JP, Qu YQ.	Front Mol Biosci. 2021 Jun 4;8:644620. doi: 10.3389/fmolb.2021.644620. eCollection 2021.	Li R	Front Mol Biosci	2021	2021-06-21	PMC8211991	10.3389/fmolb.2021.644620
33495421	The hepatic microenvironment promotes lung adenocarcinoma cell proliferation, metastasis, and epithelial-mesenchymal transition via METTL3-mediated N6-methyladenosine modification of YAP1	Ni XF, Xie QQ, Zhao JM, Xu YJ, Ji M, Hu WW, Wu J, Wu CP.	Aging (Albany NY). 2021 Jan 20;13(3):4357-4369. doi: 10.18632/aging.202397. Epub 2021 Jan 20.	Ni XF	Aging (Albany NY)	2021	2021-01-26	PMC7906215	10.18632/aging.202397
31029827	METTL14 is essential for β-cell survival and insulin secretion	Liu J, Luo G, Sun J, Men L, Ye H, He C, Ren D.	Biochim Biophys Acta Mol Basis Dis. 2019 Sep 1;1865(9):2138-2148. doi: 10.1016/j.bbadis.2019.04.011. Epub 2019 Apr 26.	Liu J	Biochim Biophys Acta Mol Basis Dis	2019	2019-04-29		10.1016/j.bbadis.2019.04.011
36518278	METTL16-mediated translation of CIDEA promotes non-alcoholic fatty liver disease progression via m6A-dependent manner	Tang J, Zhao X, Wei W, Liu W, Fan H, Liu XP, Li Y, Wang L, Guo J.	PeerJ. 2022 Dec 1;10:e14379. doi: 10.7717/peerj.14379. eCollection 2022.	Tang J	PeerJ	2022	2022-12-15	PMC9744165	10.7717/peerj.14379
35580525	SIAH1 promotes senescence and apoptosis of nucleus pulposus cells to exacerbate disc degeneration through ubiquitinating XIAP	Fang S, Zeng F, Chen R, Li M.	Tissue Cell. 2022 Jun;76:101820. doi: 10.1016/j.tice.2022.101820. Epub 2022 May 13.	Fang S	Tissue Cell	2022	2022-05-17		10.1016/j.tice.2022.101820
37635484	Paeonol represses A549 cell glycolytic reprogramming and proliferation by decreasing m6A modification of Acyl-CoA dehydrogenase	Zhang L, Wu L, Zhu X, Mei J, Chen Y.	Chin J Physiol. 2023 Jul-Aug;66(4):248-256. doi: 10.4103/cjop.CJOP-D-22-00166.	Zhang L	Chin J Physiol	2023	2023-08-28		10.4103/cjop.CJOP-D-22-00166
33526437	Gluten-induced RNA methylation changes regulate intestinal inflammation via allele-specific XPO1 translation in epithelial cells	Olazagoitia-Garmendia A, Zhang L, Mera P, Godbout JK, Sebastian-DelaCruz M, Garcia-Santisteban I, Mendoza LM, Huerta A, Irastorza I, Bhagat G, Green PH, Herrero L, Serra D, Rodriguez JA, Verdu EF, He C, Bilbao JR, Castellanos-Rubio A.	Gut. 2022 Jan;71(1):68-76. doi: 10.1136/gutjnl-2020-322566. Epub 2021 Feb 1.	Olazagoitia-Garmendia A	Gut	2022	2021-02-02	PMC8666699	10.1136/gutjnl-2020-322566
32248017	RBM4 regulates M1 macrophages polarization through targeting STAT1-mediated glycolysis	Huangfu N, Zheng W, Xu Z, Wang S, Wang Y, Cheng J, Li Z, Cheng K, Zhang S, Chen X, Zhu J.	Int Immunopharmacol. 2020 Jun;83:106432. doi: 10.1016/j.intimp.2020.106432. Epub 2020 Apr 2.	Huangfu N	Int Immunopharmacol	2020	2020-04-06		10.1016/j.intimp.2020.106432
34225746	The potential roles of m(6)A modification in regulating the inflammatory response in microglia	Li Q, Wen S, Ye W, Zhao S, Liu X.	J Neuroinflammation. 2021 Jul 5;18(1):149. doi: 10.1186/s12974-021-02205-z.	Li Q	J Neuroinflammation	2021	2021-07-06	PMC8259013	10.1186/s12974-021-02205-z
35722625	M6A-Related Bioinformatics Analysis Reveals a New Prognostic Risk Signature in Cutaneous Malignant Melanoma	Yu Q, Zhu H, Wang H, Aimaier R, Chung M, Wang Z, Li Q.	Dis Markers. 2022 Jun 6;2022:8114731. doi: 10.1155/2022/8114731. eCollection 2022.	Yu Q	Dis Markers	2022	2022-06-20	PMC9201746	10.1155/2022/8114731
35287562	RNA modification writers influence tumor microenvironment in gastric cancer and prospects of targeted drug therapy	Song P, Zhou S, Qi X, Jiao Y, Gong Y, Zhao J, Yang H, Qian Z, Qian J, Tang L.	J Bioinform Comput Biol. 2022 Apr;20(2):2250004. doi: 10.1142/S0219720022500044. Epub 2022 Mar 14.	Song P	J Bioinform Comput Biol	2022	2022-03-15		10.1142/S0219720022500044
37034774	Accumulation of m(6)A exhibits stronger correlation with MAPT than β-amyloid pathology in an APP(NL-G-F) /MAPT(P301S) mouse model of Alzheimer's disease	Jiang L, Roberts R, Wong M, Zhang L, Webber CJ, Kilci A, Jenkins M, Sun G, Rashad S, Sun J, Dedon PC, Daley SA, Xia W, Ortiz AR, Dorrian L, Saito T, Saido TC, Wolozin B.	bioRxiv [Preprint]. 2023 Mar 28:2023.03.28.534515. doi: 10.1101/2023.03.28.534515.	Jiang L	bioRxiv	2023	2023-04-10	PMC10081259	10.1101/2023.03.28.534515
36947229	Epitranscriptomic profiling of m6A RNA methylation in renal epithelial tubular cells stimulated with calcium oxalate crystals through microarray analysis	Yang BY, Zhao FZ, Li J, Wang XC, Zhao HM, Tian Y.	Urolithiasis. 2023 Mar 22;51(1):57. doi: 10.1007/s00240-023-01425-7.	Yang BY	Urolithiasis	2023	2023-03-22		10.1007/s00240-023-01425-7
31772500	METTL3 Attenuates LPS-Induced Inflammatory Response in Macrophages via NF-κB Signaling Pathway	Wang J, Yan S, Lu H, Wang S, Xu D.	Mediators Inflamm. 2019 Oct 24;2019:3120391. doi: 10.1155/2019/3120391. eCollection 2019.	Wang J	Mediators Inflamm	2019	2019-11-28	PMC6854952	10.1155/2019/3120391
35864150	The N6-methyladenosine writer WTAP contributes to the induction of immune tolerance post kidney transplantation by targeting regulatory T cells	Wang Z, Qi Y, Feng Y, Xu H, Wang J, Zhang L, Zhang J, Hou X, Feng G, Shang W.	Lab Invest. 2022 Nov;102(11):1268-1279. doi: 10.1038/s41374-022-00811-w. Epub 2022 Jul 21.	Wang Z	Lab Invest	2022	2022-07-21		10.1038/s41374-022-00811-w
36483682	Long Noncoding RNA and mRNA m6A Modification Analyses of Periodontal Ligament Stem Cells from the Periodontitis Microenvironment Exposed to Static Mechanical Strain	Sun W, Liu J, Zhang X, Zhang X, Gao J, Chen X, Wang X, Qin W, Jin Z.	Stem Cells Int. 2022 Nov 29;2022:6243004. doi: 10.1155/2022/6243004. eCollection 2022.	Sun W	Stem Cells Int	2022	2022-12-09	PMC9726269	10.1155/2022/6243004
34968770	METTL3 inhibition ameliorates liver damage in mouse with hepatitis B virus-associated acute-on-chronic liver failure by regulating miR-146a-5p maturation	Cheng D, Wu C, Li Y, Liu Y, Mo J, Fu L, Peng S.	Biochim Biophys Acta Gene Regul Mech. 2022 Apr;1865(3):194782. doi: 10.1016/j.bbagrm.2021.194782. Epub 2021 Dec 29.	Cheng D	Biochim Biophys Acta Gene Regul Mech	2022	2021-12-30		10.1016/j.bbagrm.2021.194782
32165618	Impact of the gut microbiota on the m(6)A epitranscriptome of mouse cecum and liver	Jabs S, Biton A, Bécavin C, Nahori MA, Ghozlane A, Pagliuso A, Spanò G, Guérineau V, Touboul D, Giai Gianetto Q, Chaze T, Matondo M, Dillies MA, Cossart P.	Nat Commun. 2020 Mar 12;11(1):1344. doi: 10.1038/s41467-020-15126-x.	Jabs S	Nat Commun	2020	2020-03-14	PMC7067863	10.1038/s41467-020-15126-x
35461899	METTL3 mediates osteoblast apoptosis by regulating endoplasmic reticulum stress during LPS-induced inflammation	Kong Y, Zhang Y, Cai Y, Li D, Yi B, Xu Q.	Cell Signal. 2022 Jul;95:110335. doi: 10.1016/j.cellsig.2022.110335. Epub 2022 Apr 21.	Kong Y	Cell Signal	3	2022-04-24		10.1016/j.cellsig.2022.110335
36378581	Fat mass and obesity-associated protein alleviates Aβ(1-40) induced retinal pigment epithelial cells degeneration via PKA/CREB signaling pathway	Hu Y, Chen J, Wang Y, Sun J, Huang P, Feng J, Liu T, Sun X.	Cell Biol Int. 2023 Mar;47(3):584-597. doi: 10.1002/cbin.11959. Epub 2022 Nov 15.	Hu Y	Cell Biol Int	2023	2022-11-15		10.1002/cbin.11959
38150369	THE ROLE OF N6-METHYLADENOSINE METHYLTRANSFERASE RBM15 IN NONALCOHOLIC FATTY LIVER DISEASE	Li S, Lian S, Cheng W, Zhang T, Gong X.	Shock. 2024 Feb 1;61(2):311-321. doi: 10.1097/SHK.0000000000002294. Epub 2023 Dec 17.	Li S	Shock	2024	2023-12-27		10.1097/SHK.0000000000002294
35356071	m(6)A Regulator-Mediated Methylation Modification Patterns and Characterisation of Tumour Microenvironment Infiltration in Non-Small Cell Lung Cancer	Fan Y, Zhou Y, Lou M, Li X, Zhu X, Yuan K.	J Inflamm Res. 2022 Mar 23;15:1969-1989. doi: 10.2147/JIR.S356841. eCollection 2022.	Fan Y	J Inflamm Res	2022	2022-03-31	PMC8958726	10.2147/JIR.S356841
36194423	Inhibition of the m6A Methyltransferase METTL3 Attenuates the Inflammatory Response in Fusarium solani-Induced Keratitis via the NF-κB Signaling Pathway	Tang H, Huang L, Hu J.	Invest Ophthalmol Vis Sci. 2022 Oct 3;63(11):2. doi: 10.1167/iovs.63.11.2.	Tang H	Invest Ophthalmol Vis Sci	2022	2022-10-04	PMC9547362	10.1167/iovs.63.11.2
37277716	Increased METTL3 expression and m(6)A RNA methylation may contribute to the development of dry eye in primary Sjögren's syndrome	Ma J, Wang X, Yang X, Wang X, Tan T, Fang H, Zhong Y, Zhang Q.	BMC Ophthalmol. 2023 Jun 5;23(1):252. doi: 10.1186/s12886-023-02988-0.	Ma J	BMC Ophthalmol	2023	2023-06-05	PMC10243060	10.1186/s12886-023-02988-0
36058192	The m(6)A demethylase FTO promotes renal epithelial-mesenchymal transition by reducing the m(6)A modification of lncRNA GAS5	Li X, Li Y, Wang Y, He X.	Cytokine. 2022 Nov;159:156000. doi: 10.1016/j.cyto.2022.156000. Epub 2022 Sep 1.	Li X	Cytokine	2022	2022-09-04		10.1016/j.cyto.2022.156000
34902811	N6-methyladenosine modification of TGM2 mRNA contributes to the inhibitory activity of sarsasapogenin in rheumatoid arthritis fibroblast-like synoviocytes	Lin X, Tao C, Zhang R, Zhang M, Wang Q, Chen J.	Phytomedicine. 2022 Jan;95:153871. doi: 10.1016/j.phymed.2021.153871. Epub 2021 Nov 30.	Lin X	Phytomedicine	2022	2021-12-13		10.1016/j.phymed.2021.153871
34881240	LuHui Derivative, A Novel Compound That Inhibits the Fat Mass and Obesity-Associated (FTO), Alleviates the Inflammatory Response and Injury in Hyperlipidemia-Induced Cardiomyopathy	Yu Y, Pan Y, Fan Z, Xu S, Gao Z, Ren Z, Yu J, Li W, Liu F, Gu J, Yuan Y, Du Z.	Front Cell Dev Biol. 2021 Nov 22;9:731365. doi: 10.3389/fcell.2021.731365. eCollection 2021.	Yu Y	Front Cell Dev Biol	2021	2021-12-09	PMC8647038	10.3389/fcell.2021.731365
33777659	The role of RNA epigenetic modification in normal and malignant hematopoiesis	Vasic R, Gao Y, Liu C, Halene S.	Curr Stem Cell Rep. 2020 Dec;6(4):144-155. doi: 10.1007/s40778-020-00178-y. Epub 2020 Aug 12.	Vasic R	Curr Stem Cell Rep	2020	2021-03-29	PMC7992056	10.1007/s40778-020-00178-y
36538851	Overexpression of FTO alleviates osteoarthritis by regulating the processing of miR-515-5p and the TLR4/MyD88/NF-κB axis	Cai D, Zhang J, Yang J, Lv Q, Zhong C.	Int Immunopharmacol. 2023 Jan;114:109524. doi: 10.1016/j.intimp.2022.109524. Epub 2022 Dec 18.	Cai D	Int Immunopharmacol	2023	2022-12-20		10.1016/j.intimp.2022.109524
35832126	Inhibition of TLR4 Suppresses the Inflammatory Response in Inflammatory Bowel Disease (IBD) by Modulating the PDK1-Induced Metabolism Reprogramming via a m6A-Denpendent Manner	Wang J, Huang J, Fang L.	Comput Math Methods Med. 2022 Jul 4;2022:1335562. doi: 10.1155/2022/1335562. eCollection 2022.	Wang J	Comput Math Methods Med	2022	2022-07-14	PMC9273424	10.1155/2022/1335562
35480327	m6A Regulator-Mediated RNA Methylation Modification Patterns are Involved in the Pathogenesis and Immune Microenvironment of Depression	Wang Y, Wang X, Yang C, Hua W, Wang H.	Front Genet. 2022 Apr 11;13:865695. doi: 10.3389/fgene.2022.865695. eCollection 2022.	Wang Y	Front Genet	2022	2022-04-28	PMC9035487	10.3389/fgene.2022.865695
35246004	Emodin relieves the inflammation and pyroptosis of lipopolysaccharide-treated 1321N1 cells by regulating methyltransferase-like 3 -mediated NLR family pyrin domain containing 3 expression	Wang B, Liu Y, Jiang R, Liu Z, Gao H, Chen F, Mei J.	Bioengineered. 2022 Mar;13(3):6740-6749. doi: 10.1080/21655979.2022.2045836.	Wang B	Bioengineered	2022	2022-03-05	PMC8973593	10.1080/21655979.2022.2045836
31745845	Chronic corticosterone exposure induces liver inflammation and fibrosis in association with m(6)A-linked post-transcriptional suppression of heat shock proteins in chicken	Feng Y, Hu Y, Hou Z, Sun Q, Jia Y, Zhao R.	Cell Stress Chaperones. 2020 Jan;25(1):47-56. doi: 10.1007/s12192-019-01034-7. Epub 2019 Nov 19.	Feng Y	Cell Stress Chaperones	2020	2019-11-21	PMC6985306	10.1007/s12192-019-01034-7
35040253	New insights into the central sympathetic hyperactivity post-myocardial infarction: Roles of METTL3-mediated m(6) A methylation	Qi L, Hu H, Wang Y, Hu H, Wang K, Li P, Yin J, Shi Y, Wang Y, Zhao Y, Lyu H, Feng M, Xue M, Li X, Li Y, Yan S.	J Cell Mol Med. 2022 Feb;26(4):1264-1280. doi: 10.1111/jcmm.17183. Epub 2022 Jan 17.	Qi L	J Cell Mol Med	2022	2022-01-18	PMC8831944	10.1111/jcmm.17183
35755020	Expression and Clinical Significance of the m6A RNA-Binding Proteins YTHDF2 in Peripheral Blood Mononuclear Cells From New-Onset Ankylosing Spondylitis	Luo Q, Guo Y, Xiao Q, Fu B, Zhang L, Guo Y, Huang Z, Li J.	Front Med (Lausanne). 2022 Jun 9;9:922219. doi: 10.3389/fmed.2022.922219. eCollection 2022.	Luo Q	Front Med (Lausanne)	2022	2022-06-27	PMC9218531	10.3389/fmed.2022.922219
38144308	Decoding the role of m(6)A Regulators in identifying and characterizing molecular subtypes of rosacea	Zhang S, Wu M, Xue W.	Heliyon. 2023 Dec 5;9(12):e23310. doi: 10.1016/j.heliyon.2023.e23310. eCollection 2023 Dec.	Zhang S	Heliyon	2023	2023-12-25	PMC10746518	10.1016/j.heliyon.2023.e23310
34877932	TTP protects against acute liver failure by regulating CCL2 and CCL5 through m6A RNA methylation	Xiao P, Li M, Zhou M, Zhao X, Wang C, Qiu J, Fang Q, Jiang H, Dong H, Zhou R.	JCI Insight. 2021 Dec 8;6(23):e149276. doi: 10.1172/jci.insight.149276.	Xiao P	JCI Insight	2021	2021-12-08	PMC8675193	10.1172/jci.insight.149276
36293529	Reduction of Methyltransferase-like 3-Mediated RNA N6-Methyladenosine Exacerbates the Development of Psoriasis Vulgaris in Imiquimod-Induced Psoriasis-like Mouse Model	Wang Y, Huang J, Jin H.	Int J Mol Sci. 2022 Oct 21;23(20):12672. doi: 10.3390/ijms232012672.	Wang Y	Int J Mol Sci	2022	2022-10-27	PMC9603933	10.3390/ijms232012672
38477952	Methyltransferase-like 3 (METTL3) Epigenetically Modulates Glutathione Peroxidase 4 (GPX4) Expression to Affect Asthma	Lin L, Hu X, Li Q, Huang L.	Iran J Allergy Asthma Immunol. 2023 Dec 28;22(6):551-560. doi: 10.18502/ijaai.v22i6.14644.	Lin L	Iran J Allergy Asthma Immunol	2023	2024-03-13		10.18502/ijaai.v22i6.14644
35059772	Dihydroartemisinin alleviates AngII-induced vascular smooth muscle cell proliferation and inflammatory response by blocking the FTO/NR4A3 axis	Huo YB, Gao X, Peng Q, Nie Q, Bi W.	Inflamm Res. 2022 Feb;71(2):243-253. doi: 10.1007/s00011-021-01533-3. Epub 2022 Jan 21.	Huo YB	Inflamm Res	2022	2022-01-21		10.1007/s00011-021-01533-3
34017338	Targeted Inhibition of FTO Demethylase Protects Mice Against LPS-Induced Septic Shock by Suppressing NLRP3 Inflammasome	Luo J, Wang F, Sun F, Yue T, Zhou Q, Yang C, Rong S, Yang P, Xiong F, Yu Q, Zhang S, Wang CY, Li J.	Front Immunol. 2021 May 4;12:663295. doi: 10.3389/fimmu.2021.663295. eCollection 2021.	Luo J	Front Immunol	2021	2021-05-21	PMC8128997	10.3389/fimmu.2021.663295
35281825	m(6)A mRNA Methylation Was Associated With Gene Expression and Lipid Metabolism in Liver of Broilers Under Lipopolysaccharide Stimulation	Guo F, Zhang Y, Ma J, Yu Y, Wang Q, Gao P, Wang L, Xu Z, Wei X, Jing M.	Front Genet. 2022 Feb 25;13:818357. doi: 10.3389/fgene.2022.818357. eCollection 2022.	Guo F	Front Genet	2022	2022-03-14	PMC8914017	10.3389/fgene.2022.818357
32042813	Increased m6A methylation level is associated with the progression of human abdominal aortic aneurysm	He Y, Xing J, Wang S, Xin S, Han Y, Zhang J.	Ann Transl Med. 2019 Dec;7(24):797. doi: 10.21037/atm.2019.12.65.	He Y	Ann Transl Med	2019	2020-02-12	PMC6989874	10.21037/atm.2019.12.65
36505499	An overview of the effects and mechanisms of m6 A methylation on innate immune cells in sepsis	Qian W, Cao Y.	Front Immunol. 2022 Nov 24;13:1041990. doi: 10.3389/fimmu.2022.1041990. eCollection 2022.	Qian W	Front Immunol	2022	2022-12-12	PMC9731128	10.3389/fimmu.2022.1041990
36675257	Yth m(6)A RNA-Binding Protein 1 Regulates Osteogenesis of MC3T3-E1 Cells under Hypoxia via Translational Control of Thrombospondin-1	Shi D, Liu X, Li X, Li T, Liu J, Wu L.	Int J Mol Sci. 2023 Jan 16;24(2):1741. doi: 10.3390/ijms24021741.	Shi D	Int J Mol Sci	2023	2023-01-21	PMC9863954	10.3390/ijms24021741
36341798	Polychlorinated biphenyls alter hepatic m6A mRNA methylation in a mouse model of environmental liver disease	Petri BJ, Piell KM, Wahlang B, Head KZ, Andreeva K, Rouchka EC, Cave MC, Klinge CM.	Environ Res. 2023 Jan 1;216(Pt 3):114686. doi: 10.1016/j.envres.2022.114686. Epub 2022 Oct 28.	Petri BJ	Environ Res	2023	2022-11-07	PMC10120843	10.1016/j.envres.2022.114686
33329722	Integrated Analysis of m6A Methylome in Cisplatin-Induced Acute Kidney Injury and Berberine Alleviation in Mouse	Shen J, Wang W, Shao X, Wu J, Li S, Che X, Ni Z.	Front Genet. 2020 Nov 20;11:584460. doi: 10.3389/fgene.2020.584460. eCollection 2020.	Shen J	Front Genet	2020	2020-12-17	PMC7718005	10.3389/fgene.2020.584460
31186141	METTL3 promotes experimental osteoarthritis development by regulating inflammatory response and apoptosis in chondrocyte	Liu Q, Li M, Jiang L, Jiang R, Fu B.	Biochem Biophys Res Commun. 2019 Aug 13;516(1):22-27. doi: 10.1016/j.bbrc.2019.05.168. Epub 2019 Jun 8.	Liu Q	Biochem Biophys Res Commun	2019	2019-06-13		10.1016/j.bbrc.2019.05.168
25452335	Meclofenamic acid selectively inhibits FTO demethylation of m6A over ALKBH5	Huang Y, Yan J, Li Q, Li J, Gong S, Zhou H, Gan J, Jiang H, Jia GF, Luo C, Yang CG.	Nucleic Acids Res. 2015 Jan;43(1):373-84. doi: 10.1093/nar/gku1276. Epub 2014 Dec 1.	Huang Y	Nucleic Acids Res	2015	2014-12-03	PMC4288171	10.1093/nar/gku1276
35468611	Senolytics Cocktail Dasatinib and Quercetin Alleviate Human Umbilical Vein Endothelial Cell Senescence via the TRAF6-MAPK-NF-κB Axis in a YTHDF2-Dependent Manner	Fan T, Du Y, Zhang M, Zhu AR, Zhang J.	Gerontology. 2022;68(8):920-934. doi: 10.1159/000522656. Epub 2022 Apr 25.	Fan T	Gerontology	2022	2022-04-25		10.1159/000522656
33535619	Resveratrol Supplementation Attenuates Cognitive and Molecular Alterations under Maternal High-Fat Diet Intake: Epigenetic Inheritance over Generations	Izquierdo V, Palomera-Ávalos V, Pallàs M, Griñán-Ferré C.	Int J Mol Sci. 2021 Feb 1;22(3):1453. doi: 10.3390/ijms22031453.	Izquierdo V	Int J Mol Sci	2021	2021-02-04	PMC7867164	10.3390/ijms22031453
36265285	RNA-m6A modification of HDGF mediated by Mettl3 aggravates the progression of atherosclerosis by regulating macrophages polarization via energy metabolism reprogramming	Zheng L, Chen X, Yin Q, Gu J, Chen J, Chen M, Zhang Y, Dong M, Jiang H, Yin N, Chen H, Li X.	Biochem Biophys Res Commun. 2022 Dec 20;635:120-127. doi: 10.1016/j.bbrc.2022.10.032. Epub 2022 Oct 10.	Zheng L	Biochem Biophys Res Commun	2022	2022-10-20		10.1016/j.bbrc.2022.10.032
30591559	RNA-binding protein YTHDF3 suppresses interferon-dependent antiviral responses by promoting FOXO3 translation	Zhang Y, Wang X, Zhang X, Wang J, Ma Y, Zhang L, Cao X.	Proc Natl Acad Sci U S A. 2019 Jan 15;116(3):976-981. doi: 10.1073/pnas.1812536116. Epub 2018 Dec 27.	Zhang Y	Proc Natl Acad Sci U S A	2019	2018-12-29	PMC6338863	10.1073/pnas.1812536116
37434495	The m(6) A modification of Il17a in CD4(+) T cells promotes inflammation in psoriasis	Yuan L, Chen S, Ding K, Wang X, Lv W, Liu Y, He S, Yu Y, Yang B, Huang T.	Exp Dermatol. 2024 Jan;33(1):e14879. doi: 10.1111/exd.14879. Epub 2023 Jul 12.	Yuan L	Exp Dermatol	2024	2023-07-12		10.1111/exd.14879
38154164	Significance of m6A in subtype identification, immunological evolution, and therapeutic sensitivity of RA	Ma C, Wu J, Lei H, Huang H, Li Y.	Immunobiology. 2024 Jan;229(1):152781. doi: 10.1016/j.imbio.2023.152781. Epub 2023 Dec 21.	Ma C	Immunobiology	2024	2023-12-28		10.1016/j.imbio.2023.152781
31436138	Transient Focal Ischemia Significantly Alters the m(6)A Epitranscriptomic Tagging of RNAs in the Brain	Chokkalla AK, Mehta SL, Kim T, Chelluboina B, Kim J, Vemuganti R.	Stroke. 2019 Oct;50(10):2912-2921. doi: 10.1161/STROKEAHA.119.026433. Epub 2019 Aug 22.	Chokkalla AK	Stroke	2019	2019-08-23	PMC6759411	10.1161/STROKEAHA.119.026433
33658830	Transcriptome-Wide High-Throughput m6A Sequencing of Differential m6A Methylation Patterns in the Human Rheumatoid Arthritis Fibroblast-Like Synoviocytes Cell Line MH7A	Jiang H, Cao K, Fan C, Cui X, Ma Y, Liu J.	J Inflamm Res. 2021 Feb 25;14:575-586. doi: 10.2147/JIR.S296006. eCollection 2021.	Jiang H	J Inflamm Res	2021	2021-03-04	PMC7920605	10.2147/JIR.S296006
30567729	Mettl3 Deficiency Sustains Long-Chain Fatty Acid Absorption through Suppressing Traf6-Dependent Inflammation Response	Zong X, Zhao J, Wang H, Lu Z, Wang F, Du H, Wang Y.	J Immunol. 2019 Jan 15;202(2):567-578. doi: 10.4049/jimmunol.1801151. Epub 2018 Dec 19.	Zong X	J Immunol	2019	2018-12-21	PMC6321842	10.4049/jimmunol.1801151
35777340	Comprehensive analysis of transcriptome-wide m(6)A methylome in the lung tissues of mice with acute particulate matter exposure	Song J, Zeng Y, Zhu M, Zhu G, Chen C, Jin M, Wang J, Song Y.	Ecotoxicol Environ Saf. 2022 Aug;241:113810. doi: 10.1016/j.ecoenv.2022.113810. Epub 2022 Jun 28.	Song J	Ecotoxicol Environ Saf	2022	2022-07-01		10.1016/j.ecoenv.2022.113810
34975410	Low Expression of YTH Domain-Containing 1 Promotes Microglial M1 Polarization by Reducing the Stability of Sirtuin 1 mRNA	Zhou H, Xu Z, Liao X, Tang S, Li N, Hou S.	Front Cell Neurosci. 2021 Dec 15;15:774305. doi: 10.3389/fncel.2021.774305. eCollection 2021.	Zhou H	Front Cell Neurosci	2021	2022-01-03	PMC8714917	10.3389/fncel.2021.774305
30862814	A novel RT-QPCR-based assay for the relative quantification of residue specific m6A RNA methylation	Castellanos-Rubio A, Santin I, Olazagoitia-Garmendia A, Romero-Garmendia I, Jauregi-Miguel A, Legarda M, Bilbao JR.	Sci Rep. 2019 Mar 12;9(1):4220. doi: 10.1038/s41598-019-40018-6.	Castellanos-Rubio A	Sci Rep	2019	2019-03-14	PMC6414506	10.1038/s41598-019-40018-6
36977205	METTL3 relieved the injury of SH-SY5Y cells treated with lipopolysaccharide and exposed to sevoflurane through regulating the m6A levels of Sox2	Wang Y, Yang Z.	Brain Behav. 2023 May;13(5):e2936. doi: 10.1002/brb3.2936. Epub 2023 Mar 28.	Wang Y	Brain Behav	2023	2023-03-28	PMC10176003	10.1002/brb3.2936
37724835	METTL3 Regulates the m(6)A Modification of NEK7 to Inhibit the Formation of Osteoarthritis	Xiong X, Xiong H, Peng J, Liu Y, Zong Y.	Cartilage. 2023 Sep 19:19476035231200336. doi: 10.1177/19476035231200336. Online ahead of print.	Xiong X	Cartilage	2023	2023-09-19		10.1177/19476035231200336
36091778	Integrated analysis of inflammatory response subtype-related signature to predict clinical outcomes, immune status and drug targets in lower-grade glioma	Cao Y, Zhu H, Chen Q, Huang H, Xie D, Li X, Jiang X, Ren C, Peng J.	Front Pharmacol. 2022 Aug 26;13:914667. doi: 10.3389/fphar.2022.914667. eCollection 2022.	Cao Y	Front Pharmacol	2022	2022-09-12	PMC9459010	10.3389/fphar.2022.914667
34548079	UPLC-MS/MS method for simultaneously determining nucleosides and methyl-nucleosides in liver mRNA of Epimedin C-induced liver injury mouse model	Song Z, Li Z, Wen X, Liu R, Tian X.	Chin Med. 2021 Sep 21;16(1):91. doi: 10.1186/s13020-021-00501-7.	Song Z	Chin Med	2021	2021-09-22	PMC8454167	10.1186/s13020-021-00501-7
33670900	Salivary Outer Membrane Vesicles and DNA Methylation of Small Extracellular Vesicles as Biomarkers for Periodontal Status: A Pilot Study	Han P, Bartold PM, Salomon C, Ivanovski S.	Int J Mol Sci. 2021 Feb 28;22(5):2423. doi: 10.3390/ijms22052423.	Han P	Int J Mol Sci	2021	2021-03-06	PMC7957785	10.3390/ijms22052423
36007795	Role of RNA m(6)A modification in titanium dioxide nanoparticle-induced acute pulmonary injury: An in vitro and in vivo study	Ruan F, Liu C, Wang Y, Cao X, Tang Z, Xu J, Zeng J, Yin H, Zheng N, Yang C, Zuo Z, He C.	Environ Pollut. 2022 Oct 15;311:119986. doi: 10.1016/j.envpol.2022.119986. Epub 2022 Aug 22.	Ruan F	Environ Pollut	2022	2022-08-25		10.1016/j.envpol.2022.119986
35211628	29 m(6)A-RNA Methylation (Epitranscriptomic) Regulators Are Regulated in 41 Diseases including Atherosclerosis and Tumors Potentially via ROS Regulation - 102 Transcriptomic Dataset Analyses	Liu M, Xu K, Saaoud F, Shao Y, Zhang R, Lu Y, Sun Y, Drummer C 4th, Li L, Wu S, Kunapuli SP, Criner GJ, Sun J, Shan H, Jiang X, Wang H, Yang X.	J Immunol Res. 2022 Feb 15;2022:1433323. doi: 10.1155/2022/1433323. eCollection 2022.	Liu M	J Immunol Res	2022	2022-02-25	PMC8863469	10.1155/2022/1433323
35547245	Prognostic Value of Drug Targets Predicted Using Deep Bioinformatic Analysis of m6A-Associated lncRNA-Based Pancreatic Cancer Model Characteristics and Its Tumour Microenvironment	Cao PW, Liu L, Li ZH, Cao F, Liu FB.	Front Genet. 2022 Apr 25;13:853471. doi: 10.3389/fgene.2022.853471. eCollection 2022.	Cao PW	Front Genet	2022	2022-05-13	PMC9081602	10.3389/fgene.2022.853471
29502358	METTL3 regulates alternative splicing of MyD88 upon the lipopolysaccharide-induced inflammatory response in human dental pulp cells	Feng Z, Li Q, Meng R, Yi B, Xu Q.	J Cell Mol Med. 2018 May;22(5):2558-2568. doi: 10.1111/jcmm.13491. Epub 2018 Mar 4.	Feng Z	J Cell Mol Med	2018	2018-03-05	PMC5908103	10.1111/jcmm.13491
29488640	Curcumin Attenuates Lipopolysaccharide-Induced Hepatic Lipid Metabolism Disorder by Modification of m(6) A RNA Methylation in Piglets	Lu N, Li X, Yu J, Li Y, Wang C, Zhang L, Wang T, Zhong X.	Lipids. 2018 Jan;53(1):53-63. doi: 10.1002/lipd.12023.	Lu N	Lipids	2018	2018-03-01		10.1002/lipd.12023
34737761	Comprehensive Analysis of Transcriptome-wide m(6)A Methylome Upon Clostridium perfringens Beta2 Toxin Exposure in Porcine Intestinal Epithelial Cells by m(6)A Sequencing	Zhang J, Yang Q, Yang J, Gao X, Luo R, Huang X, Yan Z, Wang P, Wang W, Xie K, Zhang B, Gun S.	Front Genet. 2021 Oct 19;12:689748. doi: 10.3389/fgene.2021.689748. eCollection 2021.	Zhang J	Front Genet	2021	2021-11-05	PMC8560698	10.3389/fgene.2021.689748
33894271	METTL3 involves the progression of osteoarthritis probably by affecting ECM degradation and regulating the inflammatory response	Sang W, Xue S, Jiang Y, Lu H, Zhu L, Wang C, Ma J.	Life Sci. 2021 Aug 1;278:119528. doi: 10.1016/j.lfs.2021.119528. Epub 2021 Apr 21.	Sang W	Life Sci	2021	2021-04-24		10.1016/j.lfs.2021.119528
31736012	Comprehensive analysis of the expression profile of circRNAs and their predicted protein-coding ability in the muscle of mdx mice	Song Z, Liu Y, Fang X, Xie M, Ma Z, Zhong Z, Feng X, Zhang W.	Funct Integr Genomics. 2020 May;20(3):397-407. doi: 10.1007/s10142-019-00724-w. Epub 2019 Nov 18.	Song Z	Funct Integr Genomics	2020	2019-11-19		10.1007/s10142-019-00724-w
36536497	Proteomics analysis of meclofenamic acid-treated small cell lung carcinoma cells revealed changes in cellular energy metabolism for cancer cell survival	Yanar S, Kasap M, Kanli A, Akpinar G, Sarihan M.	J Biochem Mol Toxicol. 2023 Apr;37(4):e23289. doi: 10.1002/jbt.23289. Epub 2022 Dec 19.	Yanar S	J Biochem Mol Toxicol	2023	2022-12-19		10.1002/jbt.23289
37121553	Mettl14 sustains FOXP3 expression to promote the differentiation and functions of induced-regulatory T cells via the mTOR signaling pathway	Liu Y, Yuan Y, Zhou Z, Jiang X, He S, Wei F, Cui Y, Yang L, Zhao G.	Immunol Lett. 2023 Jun;258:35-44. doi: 10.1016/j.imlet.2023.04.008. Epub 2023 Apr 29.	Liu Y	Immunol Lett	2023	2023-04-30		10.1016/j.imlet.2023.04.008
32674051	IFN regulatory Factor-1 induced macrophage pyroptosis by modulating m6A modification of circ_0029589 in patients with acute coronary syndrome	Guo M, Yan R, Ji Q, Yao H, Sun M, Duan L, Xue Z, Jia Y.	Int Immunopharmacol. 2020 Sep;86:106800. doi: 10.1016/j.intimp.2020.106800. Epub 2020 Jul 13.	Guo M	Int Immunopharmacol	2020	2020-07-17		10.1016/j.intimp.2020.106800
31206562	DNA methylation from a Type I restriction modification system influences gene expression and virulence in Streptococcus pyogenes	Nye TM, Jacob KM, Holley EK, Nevarez JM, Dawid S, Simmons LA, Watson ME Jr.	PLoS Pathog. 2019 Jun 17;15(6):e1007841. doi: 10.1371/journal.ppat.1007841. eCollection 2019 Jun.	Nye TM	PLoS Pathog	2019	2019-06-18	PMC6597129	10.1371/journal.ppat.1007841
32634481	A New Model of Spontaneous Colitis in Mice Induced by Deletion of an RNA m(6)A Methyltransferase Component METTL14 in T Cells	Lu TX, Zheng Z, Zhang L, Sun HL, Bissonnette M, Huang H, He C.	Cell Mol Gastroenterol Hepatol. 2020;10(4):747-761. doi: 10.1016/j.jcmgh.2020.07.001. Epub 2020 Jul 4.	Lu TX	Cell Mol Gastroenterol Hepatol	2020	2020-07-08	PMC7498954	10.1016/j.jcmgh.2020.07.001
37013774	METTL3-mediated downregulation of splicing factor SRSF11 is associated with carcinogenesis and poor survival of cancer patients	Oh J, Oh JM, Cho SY.	Eur Rev Med Pharmacol Sci. 2023 Mar;27(6):2561-2570. doi: 10.26355/eurrev_202303_31793.	Oh J	Eur Rev Med Pharmacol Sci	2023	2023-04-04		10.26355/eurrev_202303_31793
32198816	Yin Yang-1 suppresses CD40 ligand-CD40 signaling-mediated anti-inflammatory cytokine interleukin-10 expression in pulmonary adventitial fibroblasts by promoting histone H3 tri-methylation at lysine 27 modification on interleukin-10 promoter	Pan YY, Yang JX, Xu YF, Mao W.	Cell Biol Int. 2020 Jul;44(7):1544-1555. doi: 10.1002/cbin.11351. Epub 2020 Apr 3.	Pan YY	Cell Biol Int	2020	2020-03-22		10.1002/cbin.11351
17126322	[3H]HEMADO--a novel tritiated agonist selective for the human adenosine A3 receptor	Klotz KN, Falgner N, Kachler S, Lambertucci C, Vittori S, Volpini R, Cristalli G.	Eur J Pharmacol. 2007 Feb 5;556(1-3):14-8. doi: 10.1016/j.ejphar.2006.10.048. Epub 2006 Oct 27.	Klotz KN	Eur J Pharmacol	2007	2006-11-28		10.1016/j.ejphar.2006.10.048
