# Supplementary material for: N6-methyladenosine (m6A) modification in inflammation: a bibliometric analysis and literature review
Source: PeerJ. 2024 Dec 13;12:e18645. doi: 10.7717/peerj.18645 (PMC11648684; doi:10.7717/peerj.18645)
Supplement: Supplemental Information 8 [file peerj-12-18645-s008.xlsx]

## Sheet: scopus
Author	Author full names	Author ID	Title	Year	Sourcus	DOI	DOI Link	Attribution	Abstract	Authors keywards	Index Keywords	references	Address for correspondence	Publisher	ISSN	CODEN	PubMed ID	Language	Abbreviations for source publications	Type of document	Open access	Source publications	EID
Chang H.; Yang J.; Wang Q.; Zhao J.; Zhu R.	Chang, Hongtao (57222533521); Yang, Jun (57191339291); Wang, Qianwen (57210428328); Zhao, Jingjing (57215774741); Zhu, Ruixia (36141390600)	57222533521; 57191339291; 57210428328; 57215774741; 36141390600	Role of N6-methyladenosine modification in pathogenesis of ischemic stroke	2022	Expert Review of Molecular Diagnostics	10.1080/14737159.2022.2049246	https://www.scopus.com/inward/record.uri?eid=2-s2.0-85126223317&doi=10.1080%2f14737159.2022.2049246&partnerID=40&md5=013d005124813736c3843c9c1ca78e29	Department of Neurology, The First Affiliated Hospital of China Medical University, Liaoning, Shenyang, China	Introduction: N6-Methyladenosine (m6A), the most common and reversible mRNA modification, has attracted considerable attention recently, and accumulating evidence indicates it has an important role in the progression of ischemic stroke (IS). Areas covered: We first reviewed m6A methylation modification enzymes, including m6A methyltransferases (METTL3, METTL14, and WTAP), demethylases (FTO and AL…	diagnosis; Ischemic stroke; m6A; prognosis; therapeutic	Adenosine; Alpha-Ketoglutarate-Dependent Dioxygenase FTO; Humans; Ischemic Stroke; Methylation; Methyltransferases; RNA, Messenger; 6 n methyladenosine; alkylated DNA repair protein alkB homolog 5; alpha ketoglutarate dependent dioxygenase FTO; binding protein; messenger RNA; mettl14 protein; mettl3 protein; somatomedin B; unclassified drug; wtap protein; yth domain containing 1; yth domain conta…	Manning N.W., Campbell B.C., Oxley T.J., Et al., Acute ischemic stroke: time, penumbra, and reperfusion, Stroke, 45, 2, pp. 640-644, (2014); Gropen T.I., Gagliano P.J., Blake C.A., Et al., Quality improvement in acute stroke: the New York state stroke center designation project, Neurology, 67, 1, pp. 88-93, (2006); Fisher M., Saver J.L., Future directions of acute ischaemic stroke therapy, Lancet…	R. Zhu; Department of Neurology, The First Hospital of China Medical University, Shenyang, 155 Nanjing North Street, Liaoning, 110001, China; email: zrx_200626313@163.com	Taylor and Francis Ltd.	14737159	ERMDC	35236212	English	Expert Rev. Mol. Diagn.	Review		Scopus	2-s2.0-85126223317
Yao J.; Song Y.; Yu X.; Lin Z.	Yao, Jiali (57487602500); Song, Yeke (58612293700); Yu, Xiaoping (57200690013); Lin, Zhijie (56658129500)	57487602500; 58612293700; 57200690013; 56658129500	Interaction between N6-methyladenosine modification and the tumor microenvironment in colorectal cancer	2023	Molecular Medicine	10.1186/s10020-023-00726-2	https://www.scopus.com/inward/record.uri?eid=2-s2.0-85171875581&doi=10.1186%2fs10020-023-00726-2&partnerID=40&md5=e06c936beb6afb3519bfd0bf605e878e	Department of Immunology, Institute of Translational Medicine, Medical College, Yangzhou University, Jiangsu, Yangzhou, 225009, China; Health Management Center, Affiliated Hospital of Yangzhou University, Yangzhou University, Jiangsu, Yangzhou, 225009, China; Jiangsu Key Laboratory of Experimental and Translational Non-Coding RNA Research, Yangzhou University, Yangzhou, 225001, China	The incidence and mortality of colorectal cancer (CRC) are rapidly increasing worldwide. Recently, there has been significant attention given to N6-methyladenosine (m6A), the most common mRNA modification, especially for its effects on CRC development. It is important to note that the progression of CRC would be greatly hindered without the tumor microenvironment (TME). The interaction between CR…	Colorectal cancer; m<sup>6</sup>A; Tumor microenvironment	Adenosine; Colorectal Neoplasms; Epigenesis, Genetic; Humans; Tumor Microenvironment; 6 n methyladenosine; cisplatin; fluorouracil; immune checkpoint inhibitor; oxaliplatin; adenosine; N-methyladenosine; cancer chemotherapy; cancer immunotherapy; carcinogenesis; colorectal cancer; genetic analysis; genetic modification; human; immune system; inflammation; molecularly targeted therapy; nonhuman; R…	Alarcon C.R., Lee H., Goodarzi H., Halberg N., Tavazoie S.F., N6-methyladenosine marks primary microRNAs for processing, Nature, 519, pp. 482-485, (2015); Alarcon C., Et al., HNRNPA2B1 is a mediator of m (6)A-dependent nuclear RNA processing events, Cell, (2015); Allis C.D., Jenuwein T., The molecular hallmarks of epigenetic control, Nat Rev Genet, 17, pp. 487-500, (2016); An Y., Duan H., The rol…	Z. Lin; Department of Immunology, Institute of Translational Medicine, Medical College, Yangzhou University, Yangzhou, Jiangsu, 225009, China; email: zjielin@yzu.edu.cn	BioMed Central Ltd	10761551	MOMEE	37737134	English	Mol. Med.	Review	All Open Access; Gold Open Access	Scopus	2-s2.0-85171875581
Zhao W.; Li J.; Ma Q.; Cai J.; Li A.; Wu W.; Lv Y.; Cai M.	Zhao, Wanzhen (57425229500); Li, Jianjun (57215867228); Ma, Qiang (57554984100); Cai, Jijie (57554749600); Li, Aixin (57555213800); Wu, Weijun (57303282100); Lv, Yuncheng (55086395400); Cai, Manbo (14010525100)	57425229500; 57215867228; 57554984100; 57554749600; 57555213800; 57303282100; 55086395400; 14010525100	N6-methyladenosine modification participates in neoplastic immunoregulation and tumorigenesis	2022	Journal of Cellular Physiology	10.1002/jcp.30730	https://www.scopus.com/inward/record.uri?eid=2-s2.0-85127287752&doi=10.1002%2fjcp.30730&partnerID=40&md5=3fe9e856b8cd8712bcca13cb6346a119	Department of Radiotherapy, The First Affiliated Hospital, Hengyang Medical School, University of South China, Hunan, Hengyang, China; Department of Urological Surgical, The Second Affiliated Hospital, Hengyang Medical School, University of South China, Hunan, Hengyang, China; First People's Hospital of Shaoyang, Hunan, Shaoyang, China; Class 8, Grade 2019, The First Clinical College, Changsha Me…	This review aims to provide insight into the role of N6-methyladenosine (m6A) modification in neoplastic immunity and subsequent tumorigenesis. m6A modification, which is catalyzed by methyltransferases, demethylases and reader proteins, has emerged as a widespread regulatory mechanism that controls immune-related gene expression and immune reactions during tumorigenesis. Aberrant m6A modificatio…	breast cancer; gastric cancer; hepatocellular carcinoma; m6A modification; tumor immunity	Adenosine; Carcinogenesis; Carcinoma, Hepatocellular; Cell Transformation, Neoplastic; Humans; Immunity; Inflammation; Liver Neoplasms; 6 n methyladenosine; demethylase; enzyme; methyltransferase; unclassified drug; adenosine; N-methyladenosine; biocatalysis; breast cancer; carcinogenesis; chemical modification; gene expression; human; immune-related gene; immunocompetent cell; immunoregulation; …	Abbott M., Ustoyev Y., Cancer and the immune system: The history and background of immunotherapy, Seminars in Oncology Nursing, 35, 5, (2019); Bokar J.A., Shambaugh M.E., Polayes D., Matera A.G., Rottman F.M., Purification and cDNA cloning of the AdoMet-binding subunit of the human mRNA (N6-adenosine)-methyltransferase, RNA, 3, pp. 1233-1247, (1997); Cable J., Greenbaum B., Pe'er D., Bollard C.M.…	M. Cai; Department of Radiotherapy, The First Affiliated Hospital, Hengyang Medical School, University of South China, Hengyang, Hunan, China; email: 2018012078@usc.edu.cn; Y. Lv; Guangxi Key Laboratory of Diabetic Systems Medicine, Faculty of Basic Medical Sciences, Guilin Medical University, Guilin, Guangxi, China; email: 112019066@glmc.edu.cn	John Wiley and Sons Inc	219541	JCLLA	35342948	English	J. Cell. Physiol.	Review		Scopus	2-s2.0-85127287752
Zhou X.; Chen Z.; Zhou J.; Liu Y.; Fan R.; Sun T.	Zhou, Xianwu (57207144829); Chen, Zerui (57204977567); Zhou, Jianrong (57219960851); Liu, Yaorong (57502954300); Fan, Ruixin (23496363000); Sun, Tucheng (24340242900)	57207144829; 57204977567; 57219960851; 57502954300; 23496363000; 24340242900	Transcriptome and N6-Methyladenosine RNA Methylome Analyses in Aortic Dissection and Normal Human Aorta	2021	Frontiers in Cardiovascular Medicine	10.3389/fcvm.2021.627380	https://www.scopus.com/inward/record.uri?eid=2-s2.0-85115992291&doi=10.3389%2ffcvm.2021.627380&partnerID=40&md5=bb4ccc22f3763353d1b773362d3ca10b	Department of Cardiovascular Surgery, Guangdong Cardiovascular Institute, Guangdong Provincial Key Laboratory of South China Structural Heart Disease, Guangdong Provincial People's Hospital, Guangdong Academy of Medical Sciences, Guangzhou, China; Department of Cardiovascular Surgery, Zhongnan Hospital of Wuhan University, Wuhan, China	Objective: To investigate the N6-methyladenosine (m6A) modification and the expressions of the m6A regulatory genes in the acute aortic dissection (AD). Methods: MeRIP-seq and RNA-seq experiments of aortic media tissue samples obtained from AD (n = 4) and Controls (n = 4) were conducted. m6A methylation quantification was used to measure the total mRNA m6A level. The five m6A regulators mRNA expr…	aortic dissection; extracellular matrix; inflammatory responses three; N6-methyladenosine RNA methylome analysis; transcriptome analysis		Nienaber C.A., Clough R.E., Sakalihasan N., Suzuki T., Gibbs R., Mussa F., Et al., Aortic dissection, Nat Rev Dis Primers, 2, (2016); Kox M., Pickkers P., Poison to the heart, Crit Care Med, 38, pp. 331-332, (2010); Hiltunen M.O., Yla-Herttuala S., DNA methylation, smooth muscle cells, and atherogenesis, Arterioscler Thromb Vasc Biol, 23, pp. 1750-1753, (2003); Zhuang J., Luan P., Li H., Wang K.,…	T. Sun; Department of Cardiovascular Surgery, Guangdong Cardiovascular Institute, Guangdong Provincial Key Laboratory of South China Structural Heart Disease, Guangdong Provincial People's Hospital, Guangdong Academy of Medical Sciences, Guangzhou, China; email: suntucheng1973@163.com	Frontiers Media SA	2297055X			English	Front. Cardiovasc. Med.	Article	All Open Access; Gold Open Access; Green Open Access	Scopus	2-s2.0-85115992291
Xie W.; Zhang A.; Huang X.; Zhou H.; Ying H.; Ye C.; Ren M.; Qian M.; Liu X.; Mo Y.	Xie, Wenjing (57248599900); Zhang, Anqi (57195972134); Huang, Xuliang (58099564300); Zhou, Hui (58194496300); Ying, Hangbo (58194552200); Ye, Changzhou (58099639000); Ren, Miao (57248175600); Qian, Meizi (56465417900); Liu, Xia (57247527500); Mo, Yunchang (36455052200)	57248599900; 57195972134; 58099564300; 58194496300; 58194552200; 58099639000; 57248175600; 56465417900; 57247527500; 36455052200	Silencing m6a reader ythdc1 reduces inflammatory response in sepsis-induced cardiomyopathy by inhibiting serpina3n expression	2023	Shock	10.1097/SHK.0000000000002106	https://www.scopus.com/inward/record.uri?eid=2-s2.0-85153410810&doi=10.1097%2fSHK.0000000000002106&partnerID=40&md5=0a09e1d2f80acacd25d5035b78f834e7	Department of Anesthesia, The First Affiliated Hospital of Wenzhou Medical University, Wenzhou, China	Sepsis-induced cardiomyopathy (SIC) is one of the most common complications of infection-induced sepsis. An imbalance in inflammatory mediators is the main factor leading to SIC. N6-methyladenosine (m6A) is closely related to the occurrence and development of sepsis. N6-methyladenosine reader YTH domain containing 1 (YTHDC1) is an m6A N6-methyladenosine recognition protein. However, the role of Y…	heart; inflammation; N<sup>6</sup>-methyladenosine; nucleus; sepsis	Acute-Phase Proteins; Animals; Cardiomyopathies; Inflammation; Inflammation Mediators; Lipopolysaccharides; Mice; RNA Splicing Factors; RNA, Messenger; Sepsis; Serine Proteinase Inhibitors; Serpins; 6 n methyladenosine; alkylated DNA repair protein alkB homolog 5; alpha 1 antichymotrypsin; beta actin; cathepsin G; complementary DNA; fat mass and obesityassociated protein; glyceraldehyde 3 phospha…	Okuhara Y., Yokoe S., Iwasaku T., Interleukin-18 gene deletion protects against sepsis-induced cardiac dysfunction by inhibiting PP2A activity, Int J Cardiol, 243, pp. 396-403, (2017); Vincent J.L., Bakker J., Marecaux G., Administration of anti-TNF antibody improves left ventricular function in septic shock patients. Results of a pilot study, Chest, 101, 3, pp. 810-815, (1992); Galley H.F., Oxid…	Y. Mo; The First Affiliated Hospital of Wenzhou Medical University, Zhejiang, Southern White elephant street, Ouhai District, Wenzhou, 325015, China; email: myc1104@wmu.edu.cn	Lippincott Williams and Wilkins	10732322	SAGUA	36877222	English	Shock	Article		Scopus	2-s2.0-85153410810
Yi D.; Wang Q.; Zhao Y.; Song Y.; You H.; Wang J.; Liu R.; Shi Z.; Chen X.; Luo Q.	Yi, Dazhuang (57203280943); Wang, Qunhui (57203310746); Zhao, Yuhao (57189302680); Song, Yu (57204659593); You, Hong (57205507304); Wang, Jian (57881855000); Liu, Renjie (57222626627); Shi, Zhongqiang (57222623432); Chen, Xuan (37068440900); Luo, Qi (57207344503)	57203280943; 57203310746; 57189302680; 57204659593; 57205507304; 57881855000; 57222626627; 57222623432; 37068440900; 57207344503	Alteration of N6 -Methyladenosine mRNA Methylation in a Rat Model of Cerebral Ischemia–Reperfusion Injury	2021	Frontiers in Neuroscience	10.3389/fnins.2021.605654	https://www.scopus.com/inward/record.uri?eid=2-s2.0-85103493724&doi=10.3389%2ffnins.2021.605654&partnerID=40&md5=7049563ce20ea9c01bd7a8a2ea3e5745	Department of Neurosurgery, The First Hospital of Jilin University, Changchun, China; Department of Neurosurgery, Shanghai Tenth People’s Hospital, Tongji University School of Medicine, Shanghai, China	Aim: This study was conducted in order to reveal the alterations in the N6-methyladenosine (m6A) modification profile of cerebral ischemia–reperfusion injury model rats. Materials and Methods: Rats were used to establish the middle cerebral artery occlusion and reperfusion (MCAO/R) model. MeRIP-seq and RNA-seq were performed to identify differences in m6A methylation and gene expression. The expr…	cerebral ischemia reperfusion injury; FTO; key genes; MCAO/R; N<sup>6</sup>-methyladenosine	6 n methyladenosine; alpha ketoglutarate dependent dioxygenase FTO; messenger RNA; animal cell; animal experiment; animal model; animal tissue; Article; cellular distribution; cerebral ischemia reperfusion injury; controlled study; down regulation; gene expression; inflammation; male; middle cerebral artery occlusion; nerve cell; nonhuman; rat; RNA methylation; synapse	Agarwala S.D., Blitzblau H.G., Hochwagen A., Fink G.R., RNA methylation by the MIS complex regulates a cell fate decision in yeast, PLoS Genet, 8, e1002732, (2012); Bai L., Tang Q., Zou Z., Meng P., Tu B., Xia Y., Et al., m6A Demethylase FTO regulates dopaminergic neurotransmission deficits caused by Arsenite, Toxicol. Sci, 165, pp. 431-446, (2018); Barer D., Berge E., Thrombolytic treatment for …	X. Chen; Department of Neurosurgery, The First Hospital of Jilin University, Changchun, China; email: 83823095@qq.com; Q. Luo; Department of Neurosurgery, The First Hospital of Jilin University, Changchun, China; email: Liluoqi@163.com	Frontiers Media S.A.	16624548			English	Front. Neurosci.	Article	All Open Access; Gold Open Access; Green Open Access	Scopus	2-s2.0-85103493724
Wang Y.; Xu M.; Yue P.; Zhang D.; Tong J.; Li Y.	Wang, Yang (54961438500); Xu, Miaomiao (58496981900); Yue, Peng (57195546881); Zhang, Donghui (57205111770); Tong, Jiyu (57191889495); Li, Yifei (56062217700)	54961438500; 58496981900; 57195546881; 57205111770; 57191889495; 56062217700	Novel Insights Into the Potential Mechanisms of N6-Methyladenosine RNA Modification on Sepsis-Induced Cardiovascular Dysfunction: An Update Summary on Direct and Indirect Evidences	2021	Frontiers in Cell and Developmental Biology	10.3389/fcell.2021.772921	https://www.scopus.com/inward/record.uri?eid=2-s2.0-85120433818&doi=10.3389%2ffcell.2021.772921&partnerID=40&md5=9e66b1689192691738343b083b715dc6	Key Laboratory of Birth Defects and Related Diseases of Women and Children of MOE, Department of Pediatrics, West China Second University Hospital, Sichuan University, Chengdu, China; Department of Immunology, West China School of Basic Medical Sciences and Forensic Medicine, Sichuan University, Chengdu, China; State Key Laboratory of Biocatalysis and Enzyme Engineering, School of Life Science, H…	Sepsis is a life-threatening organ dysfunction caused by a host’s dysfunctional response to infection. As is known to all, septic heart disease occurs because pathogens invading the blood stimulate the activation of endothelial cells, causing a large number of white blood cells to accumulate and trigger an immune response. However, in severe sepsis, the hematopoietic system is inhibited, and ther…	inflammation response; m6A modification; mitochondrial damages; myocardial injuries; sepsis	6 n methyladenosine; cytokine; microRNA; RNA; toll like receptor; unclassified drug; ythdf1 protein; ythdf2 protein; angiogenesis; apoptosis; biogenesis; cardiomyopathy; cardiovascular disease; coronary artery disease; disorders of mitochondrial functions; endothelial dysfunction; heart development; homeostasis; human; immune system; immunoregulation; inflammation; macrophage; mitochondrial bioge…	Batista P.J., Molinie B., Wang J., Qu K., Zhang J., Li L., Et al., m6A RNA Modification Controls Cell Fate Transition in Mammalian Embryonic Stem CellsA RNA Modification Controls Cell Fate Transition in Mammalian Embryonic Stem Cells, Cell Stem Cell, 15, 6, pp. 707-719, (2014); Bechara R., Amatya N., Bailey R.D., Li Y., Aggor F.E.Y., Li D.-D., Et al., The M 6 A Reader IMP2 Directs Autoimmune Infl…	J. Tong; Key Laboratory of Birth Defects and Related Diseases of Women and Children of MOE, Department of Pediatrics, West China Second University Hospital, Sichuan University, Chengdu, China; email: jiyu.tong@scu.edu.cn; Y. Li; Key Laboratory of Birth Defects and Related Diseases of Women and Children of MOE, Department of Pediatrics, West China Second University Hospital, Sichuan University, Ch…	Frontiers Media S.A.	2296634X			English	Front. Cell Dev. Biol.	Review	All Open Access; Gold Open Access	Scopus	2-s2.0-85120433818
Chen Z.; Hu Y.; Jin L.; Yang F.; Ding H.; Zhang L.; Li L.; Pan T.	Chen, Zhaolin (55654761300); Hu, Ying (57218483181); Jin, Le (57215208791); Yang, Fan (57007495500); Ding, Haiwen (57615506200); Zhang, Lei (57221585519); Li, Lili (57203008942); Pan, Tingting (14049085200)	55654761300; 57218483181; 57215208791; 57007495500; 57615506200; 57221585519; 57203008942; 14049085200	The Emerging Role of N6-Methyladenosine RNA Methylation as Regulators in Cancer Therapy and Drug Resistance	2022	Frontiers in Pharmacology	10.3389/fphar.2022.873030	https://www.scopus.com/inward/record.uri?eid=2-s2.0-85128763425&doi=10.3389%2ffphar.2022.873030&partnerID=40&md5=e368f9ece561a2aa6a1ff07f18d18888	Department of Pharmacy, The First Affiliated Hospital of USTC, Division of Life Sciences and Medicine, University of Science and Technology of China, Anhui Provincial Hospital, Hefei, China; Inflammation and Immune Mediated Diseases Laboratory of Anhui Province, School of Pharmacy, Anhui Medical University, Hefei, China; Department of Clinical Medical, The First Clinical Medical College, Anhui Me…	N6-methyladenosine (m6A) RNA methylation has been considered the most prevalent, abundant, and conserved internal transcriptional modification throughout the eukaryotic mRNAs. Typically, m6A RNA methylation is catalyzed by the RNA methyltransferases (writers), is removed by its demethylases (erasers), and interacts with m6A-binding proteins (readers). Accumulating evidence shows that abnormal cha…	cancer; inflammation; N6-methyladenosine (m6A); RNA methylation; therapeutic targets	6 n methyladenosine; alkbh 5; binding protein; cisplatin; cyclophosphamide; cytarabine; daunorubicin; doxorubicin; gefitinib; nilotinib; saikosaponin d; sorafenib; stm 2457; tamoxifen; temozolomide; unclassified drug; untranslated RNA; acute myeloid leukemia; biological activity; breast cancer; cancer chemotherapy; controlled study; down regulation; epigenetic modification; gene targeting; gliobl…	Aoyama T., Yamashita S., Tomita K., Mechanistic Insights into m6A Modification of U6 snRNA by Human METTL16, Nucleic Acids Res, 48, pp. 5157-5168, (2020); Bansal H., Yihua Q., Iyer S.P., Ganapathy S., Proia D.A., Proia D., Et al., WTAP Is a Novel Oncogenic Protein in Acute Myeloid Leukemia, Leukemia, 28, pp. 1171-1174, (2014); Barbieri I., Tzelepis K., Pandolfini L., Shi J., Millan-Zambrano G., R…	L. Li; Department of Hematopathology, The First Affiliated Hospital of Anhui Medical University, Hefei, China; email: clover198825@163.com; T. Pan; Department of General Surgery, Diagnosis and Therapy Center of Thyroid and Breast, The First Affiliated Hospital of USTC, Division of Life Sciences and Medicine, University of Science and Technology of China, Anhui Provincial Hospital, Hefei, China; e…	Frontiers Media S.A.	16639812			English	Front. Pharmacol.	Review	All Open Access; Gold Open Access	Scopus	2-s2.0-85128763425
Zhao K.; Yang C.-X.; Li P.; Sun W.; Kong X.-Q.	Zhao, Kun (57208244934); Yang, Chuan-xi (57201460531); Li, Peng (55534861100); Sun, Wei (56599410000); Kong, Xiang-qing (7202794522)	57208244934; 57201460531; 55534861100; 56599410000; 7202794522	Epigenetic role of N 6-methyladenosine (m6A) RNA methylation in the cardiovascular system; [N 6-甲基腺苷(m6A)RNA 甲基化在心血管系统的表观遗传学作用]	2020	Journal of Zhejiang University: Science B	10.1631/jzus.B1900680	https://www.scopus.com/inward/record.uri?eid=2-s2.0-85087632642&doi=10.1631%2fjzus.B1900680&partnerID=40&md5=b3dcd4553854e8271fa848ed3fb069e5	Department of Cardiology, the First Affiliated Hospital of Nanjing Medical University, Nanjing, 210029, China	As the most prevalent and abundant transcriptional modification in the eukaryotic genome, the continuous and dynamic regulation of N6-methyladenosine (m6A) has been shown to play a vital role in physiological and pathological processes of cardiovascular diseases (CVDs), such as ischemic heart failure (HF), myocardial hypertrophy, myocardial infarction (MI), and cardiomyogenesis. Regulation is ach…	Cardiovascular system; Metabolic disorder; N<sup>6</sup>-methyladenosine (m<sup>6</sup>A); R541.9; RNA methylation	Adenosine; Animals; Cardiovascular Diseases; Circadian Rhythm; Epigenesis, Genetic; Humans; Methylation; RNA; 6 n methyladenosine; histone demethylase; methyltransferase; adenosine; N6-methyladenosine (m6A); RNA; cardiovascular disease; cardiovascular system; circadian rhythm; developmental delay; diabetes mellitus; DNA modification; environmental factor; epigenetics; eukaryote; gene expression; …	Abdul-Ghani M.A., Jayyousi A., Defronzo R.A., Et al., Insulin resistance the link between T2DM and CVD: basic mechanisms and clinical implications, Curr Vasc Pharmacol, 17, 2, pp. 153-163, (2019); Asher G., Gatfield D., Stratmann M., Et al., Sirt1 regulates circadian clock gene expression through PER2 deacetylation, Cell, 134, 2, pp. 317-328, (2008); Bartosovic M., Molares H.C., Gregorova P., Et …	X.-Q. Kong; Department of Cardiology, the First Affiliated Hospital of Nanjing Medical University, Nanjing, 210029, China; email: xiangqing_kong@sina.com	Zhejiang University Press	16731581		32633106	English	J. Zhejiang Uni. Sci. B	Review	All Open Access; Green Open Access	Scopus	2-s2.0-85087632642
Li X.; Ma B.; Liao M.; Li L.; Zhang X.; Du M.; Yu J.; He S.; Yan H.	Li, Xiaohua (37109249000); Ma, Binyun (55364000000); Liao, Mengyu (57102601500); Li, Lingke (57816934700); Zhang, Xiaodan (57774597200); Du, Mei (36469890100); Yu, Jinguo (23053345200); He, Shikun (56576894700); Yan, Hua (35276682300)	37109249000; 55364000000; 57102601500; 57816934700; 57774597200; 36469890100; 23053345200; 56576894700; 35276682300	Potential Impact of N6-Methyladenosine RNA Methylation on Vision Function and the Pathological Processes of Ocular Diseases: New Discoveries and Future Perspectives	2022	Frontiers in Bioscience - Landmark	10.31083/j.fbl2707207	https://www.scopus.com/inward/record.uri?eid=2-s2.0-85134787821&doi=10.31083%2fj.fbl2707207&partnerID=40&md5=ac985d3109cc18f52456426519c25efc	Department of Ophthalmology, Henan Provincial People’s Hospital, Henan, Zhengzhou, 450003, China; Henan Eye Hospital, Henan Eye Institute, Henan Key Laboratory of Ophthalmology and Visual Science, Henan, Zhengzhou, 450003, China; Department of Ophthalmology, People’s Hospital of Zhengzhou University, Henan, Zhengzhou, 450003, China; Department of Ophthalmology, People’s Hospital of Henan Universi…	N6-methyladenosine (m6A) methylation/modification plays a critical role in various biological processes through post-transcriptional ribonucleic acid (RNA) modification, which involves RNA processing, nuclear export, translation and decay. Functionally, m6A modification may be involved in ocular cell growth and differentiation, stem cell identity, development, haemostasis and innate versus adapti…	eye; m6A; pathogenesis; vision function	Adenosine; Methylation; RNA; RNA Processing, Post-Transcriptional; adenosine; N-methyladenosine; RNA; genetics; metabolism; methylation; RNA processing	Nilsen TW., Internal mRNA Methylation Finally Finds Functions, Science, 343, pp. 1207-1208, (2014); Roundtree IA, He C., RNA epigenetics — chemical messages for posttranscriptional gene regulation, Current Opinion in Chemical Biology, 30, pp. 46-51, (2016); Dominissini D, Nachtergaele S, Moshitch-Moshkovitz S, Peer E, Kol N, Ben-Haim MS, Et al., The dynamic N1-methyladenosine methylome in eukaryo…	X. Li; Department of Ophthalmology, Henan Provincial People’s Hospital, Zhengzhou, Henan, 450003, China; email: xhl_6116@163.com; S. He; Department of Pathology and Ophthalmology, USC Roski Eye Institute, Keck School of Medicine, University of Southern California, Los Angeles, 90033, United States; email: shikunhe@usc.edu; H. Yan; Department of Ophthalmology, Tianjin Medical University General Ho…	Bioscience Research Institute	27686701		35866387	English	Front. Biosci. Landmark	Review	All Open Access; Gold Open Access	Scopus	2-s2.0-85134787821
Muneer A.; Wang L.; Xie L.; Zhang F.; Wu B.; Mei L.; Lenarcic E.M.; Feng E.H.; Song J.; Xiong Y.; Yu X.; Wang C.; Jain K.; Strahl B.D.; Cook J.G.; Wan Y.Y.; Moorman N.J.; Song H.; Jin J.; Chen X.	Muneer, Adil (57202516063); Wang, Li (57018401700); Xie, Ling (56693479100); Zhang, Feng (59051771500); Wu, Bing (57192066034); Mei, Liu (56604659800); Lenarcic, Erik M. (6504642396); Feng, Emerald Hillary (57221467430); Song, Juan (55248032700); Xiong, Yan (55933946600); Yu, Xufen (55439880500); Wang, Charles (57192596598); Jain, Kanishk (57141751400); Strahl, Brian D. (6701692923); Cook, Jeanet…	57202516063; 57018401700; 56693479100; 59051771500; 57192066034; 56604659800; 6504642396; 57221467430; 55248032700; 55933946600; 55439880500; 57192596598; 57141751400; 6701692923; 36898858000; 8540628400; 6508066048; 58294712500; 35264266900; 55266377200	Non-canonical function of histone methyltransferase G9a in the translational regulation of chronic inflammation	2023	Cell Chemical Biology	10.1016/j.chembiol.2023.09.012	https://www.scopus.com/inward/record.uri?eid=2-s2.0-85176379929&doi=10.1016%2fj.chembiol.2023.09.012&partnerID=40&md5=2c168bdcad2ad226cccd076393b1ee29	Department of Biochemistry & Biophysics, University of North Carolina at Chapel Hill, Chapel Hill, 27599, NC, United States; Lineberger Comprehensive Cancer Center, University of North Carolina at Chapel Hill, Chapel Hill, 27599, NC, United States; Department of Microbiology and Immunology, University of North Carolina at Chapel Hill, Chapel Hill, 27599, NC, United States; Department of Pharmacol…	We report a novel translation-regulatory function of G9a, a histone methyltransferase and well-understood transcriptional repressor, in promoting hyperinflammation and lymphopenia; two hallmarks of endotoxin tolerance (ET)-associated chronic inflammatory complications. Using multiple approaches, we demonstrate that G9a interacts with multiple translation regulators during ET, particularly the N6-…	acute respiratory distress syndrome; ARDS; COVID-19; endotoxin tolerance; hyperinflammation; protein-specific translation mechanism; regulation of chronic inflammation; sepsis; T cell impairment; translation-targeted medication; translational function of an epigenetic regulator	Histone Methyltransferases; Histone-Lysine N-Methyltransferase; Humans; Inflammation; Methylation; Methyltransferases; RNA; 6 n methyladenosine; histone methyltransferase; histone methyltransferase G9a; immune checkpoint protein; programmed death 1 ligand 1; RNA methyltransferase; RNA methyltransferase METTL3; unclassified drug; histone lysine methyltransferase; histone methyltransferase; methylt…	Cross D., Drury R., Hill J., Pollard A.J., Epigenetics in Sepsis: Understanding Its Role in Endothelial Dysfunction, Immunosuppression, and Potential Therapeutics, Front. Immunol., 10, (2019); Ciarlo E., Savva A., Roger T., Epigenetics in sepsis: targeting histone deacetylases, Int. J. Antimicrob. Agents, 42, pp. S8-S12, (2013); Newman-Toker D.E., Schaffer A.C., Yu-Moe C.W., Nassery N., Saber Teh…	X. Chen; Department of Biochemistry & Biophysics, University of North Carolina at Chapel Hill, Chapel Hill, 27599, United States; email: xianc@email.unc.edu	Elsevier Ltd	24519456		37858336	English	Cell Chem. Biol.	Article	All Open Access; Green Open Access	Scopus	2-s2.0-85176379929
Zhang X.; Li X.; Jia H.; An G.; Ni J.	Zhang, Xinning (57235717900); Li, Xin (57276677900); Jia, Hongti (7202381476); An, Guoshun (7102580562); Ni, Juhua (7201636273)	57235717900; 57276677900; 7202381476; 7102580562; 7201636273	The m6A methyltransferase METTL3 modifies PGC-1α mRNA promoting mitochondrial dysfunction and oxLDL-induced inflammation in monocytes	2021	Journal of Biological Chemistry	10.1016/j.jbc.2021.101058	https://www.scopus.com/inward/record.uri?eid=2-s2.0-85113790080&doi=10.1016%2fj.jbc.2021.101058&partnerID=40&md5=165c7bddb548073267856f53c8c9ed50	Department of Biochemistry and Biophysics, School of Basic Medical Sciences, Peking University, Beijing, China	Mitochondrial biogenesis and energy metabolism are essential for regulating the inflammatory state of monocytes. This state is partially controlled by peroxisome proliferatoractivated receptor gamma coactivator 1-alpha (PGC-1α), a coactivator that regulates mitochondrial biogenesis and energy metabolism. Disruption of these processes can also contribute to the initiation of chronic inflammatory d…		Electron Transport Complex I; Humans; Inflammation; Lipoproteins, LDL; Methyltransferases; Mitochondria; Monocytes; Peroxisome Proliferator-Activated Receptor Gamma Coactivator 1-alpha; Reactive Oxygen Species; RNA, Messenger; RNA-Binding Proteins; Alkylation; Biosynthesis; Cytology; Metabolism; Methylation; Mitochondria; Oxygen; Pathology; Plants (botany); Proteins; 6 n methyladenosine; cytochro…	Shi C., Pamer E. G., Monocyte recruitment during infection and inflammation, Nat. Rev. Immunol, 11, pp. 762-774, (2011); Auffray C., Sieweke M. H., Geissmann F., Blood monocytes: Development, heterogeneity, and relationship with dendritic cells, Annu. Rev. Immunol, 27, pp. 669-692, (2009); Duffield J. S., Macrophages and immunologic inflammation of the kidney, Semin. Nephrol, 30, pp. 234-254, (20…	J. Ni; Department of Biochemistry and Biophysics, School of Basic Medical Sciences, Peking University, Beijing, China; email: juhuani@bjmu.edu.cn	American Society for Biochemistry and Molecular Biology Inc.	219258	JBCHA	34375639	English	J. Biol. Chem.	Article	All Open Access; Gold Open Access; Green Open Access	Scopus	2-s2.0-85113790080
Feng J.; Meng W.; Chen L.; Zhang X.; Markazi A.; Yuan W.; Huang Y.; Gao S.-J.	Feng, Jian (59056346700); Meng, Wen (57209007241); Chen, Luping (57222003967); Zhang, Xinquan (57214442196); Markazi, Ashley (57200194094); Yuan, Weiming (7201519408); Huang, Yufei (35558675700); Gao, Shou-Jiang (57216470163)	59056346700; 57209007241; 57222003967; 57214442196; 57200194094; 7201519408; 35558675700; 57216470163	N6-Methyladenosine and Reader Protein YTHDF2 Enhance the Innate Immune Response by Mediating DUSP1 mRNA Degradation and Activating Mitogen-Activated Protein Kinases during Bacterial and Viral Infections	2023	mBio	10.1128/mbio.03349-22	https://www.scopus.com/inward/record.uri?eid=2-s2.0-85149154044&doi=10.1128%2fmbio.03349-22&partnerID=40&md5=d76d365cc538dfecf789850f30c417ab	Cancer Virology Program, UPMC Hillman Cancer Center, University of Pittsburgh, Pittsburgh, PA, United States; Department of Microbiology and Molecular Genetics, University of Pittsburgh, Pittsburgh, PA, United States; Department of Molecular Microbiology and Immunology, Keck School of Medicine, University of Southern California, Los Angeles, CA, United States; Department of Electrical and Compute…	Mitogen-activated protein kinases (MAPKs) play critical roles in the induction of numerous cytokines, chemokines, and inflammatory mediators that mobilize the immune system to counter pathogenic infections. Dual-specificity phosphatase 1 (DUSP1) is a member of the dual-specificity phosphatases that inactivates MAPKs through a negative-feedback mechanism. Here, we report that in response to viral …	dual-specificity phosphatase 1; DUSP1,mitogen-activated protein kinases,MAPKs; innate immunity; JNK; m6A; N6-methyladenosine; p38; p38 kinases; YTHDF2	Dual Specificity Phosphatase 1; Dual-Specificity Phosphatases; Humans; Immunity, Innate; Mitogen-Activated Protein Kinases; p38 Mitogen-Activated Protein Kinases; RNA-Binding Proteins; Transcription Factors; Virus Diseases; 6 n methyladenosine; colony stimulating factor; colony stimulating factor 3; interleukin 1beta; Janus kinase; messenger RNA; mitogen activated protein kinase; mitogen activate…	Akira S, Uematsu S, Takeuchi O., Pathogen recognition and innate immunity, Cell, 124, pp. 783-801, (2006); Medzhitov R, Janeway C, Innate immunity, N Engl J Med, 343, pp. 338-344, (2000); Arthur JS, Ley SC., Mitogen-activated protein kinases in innate immunity, Nat Rev Immunol, 13, pp. 679-692, (2013); Nishida E, Gotoh Y., The MAP kinase cascade is essential for diverse signal transduction pathwa…	S.-J. Gao; Cancer Virology Program, UPMC Hillman Cancer Center, University of Pittsburgh, Pittsburgh, United States; email: gaos8@upmc.edu	American Society for Microbiology	21612129		36625590	English	mBio	Article	All Open Access; Gold Open Access	Scopus	2-s2.0-85149154044
Yu J.; Chen H.; Ma H.; Zhang Z.; Zhu X.; Wang P.; Liu R.; Jin X.; Zhao Y.	Yu, Jiangtao (57214246241); Chen, Haihua (55628413300); Ma, Haoli (57205311248); Zhang, Zhongxiang (57207986623); Zhu, Xiaolu (57207731124); Wang, Pengcheng (57213429886); Liu, Ruining (57196116321); Jin, Xiaoqing (36179813100); Zhao, Yan (56167414200)	57214246241; 55628413300; 57205311248; 57207986623; 57207731124; 57213429886; 57196116321; 36179813100; 56167414200	Transcriptome-Wide N6-Methyladenosine Methylome Alteration in the Rat Spinal Cord After Acute Traumatic Spinal Cord Injury	2022	Frontiers in Neuroscience	10.3389/fnins.2022.848119	https://www.scopus.com/inward/record.uri?eid=2-s2.0-85132261853&doi=10.3389%2ffnins.2022.848119&partnerID=40&md5=77180976d4a2cfbbd79b6278c20ef182	Emergency Center, Zhongnan Hospital of Wuhan University, Wuhan, China; Hubei Clinical Research Center for Emergency and Resuscitation, Zhongnan Hospital of Wuhan University, Wuhan, China; Department of Biological Repositories, Zhongnan Hospital of Wuhan University, Wuhan, China	Recent studies showed that RNA N6-methyladenosine (m6A) plays an important role in neurological diseases. We used methylated RNA immunoprecipitation sequencing (MeRIP-Seq) technology to generate the m6A modification map after traumatic spinal cord injury (TSCI). A total of 2,609 differential m6A peaks were identified after TSCI. Our RNA sequencing results after TSCI showed 4,206 genes with signif…	epigenetic; m6A (N6-methyladenosine); MeRIP-Seq; methylation; mRNA; traumatic spinal cord injury	6 n methyladenosine; endocannabinoid; eosin; hematoxylin; methyltransferase; neurotrophin; paraformaldehyde; pentobarbital; transcriptome; animal experiment; animal model; animal tissue; Article; controlled study; edema; epigenetic modification; hypoxia; inflammation; ischemia; ischemic stroke; laminectomy; neurologic disease; neuromodulation; nonhuman; rat; RNA immunoprecipitation; spinal cord i…	Ahuja C.S., Wilson J.R., Nori S., Kotter M.R.N., Druschel C., Curt A., Et al., Traumatic spinal cord injury, Nat. Rev. Dis. Primers, 3, (2017); Albin M.S., White R.J., Epidemiology, physiopathology, and experimental therapeutics of acute spinal cord injury, Crit. Care Clin, 3, pp. 441-452, (1987); Basso D.M., Beattie M.S., Bresnahan J.C., A sensitive and reliable locomotor rating scale for open f…	X. Zhu; Emergency Center, Zhongnan Hospital of Wuhan University, Wuhan, China; email: 2017203030056@whu.edu.cn; X. Jin; Emergency Center, Zhongnan Hospital of Wuhan University, Wuhan, China; email: redjin@whu.edu.cn; Y. Zhao; Emergency Center, Zhongnan Hospital of Wuhan University, Wuhan, China; email: doctoryanzhao@whu.edu.cn	Frontiers Media S.A.	16624548			English	Front. Neurosci.	Article	All Open Access; Gold Open Access	Scopus	2-s2.0-85132261853
Hao W.-Y.; Lou Y.; Hu G.-Y.; Qian C.-Y.; Liang W.-R.; Zhao J.; Wang X.-H.	Hao, Wei-Yuan (54789708700); Lou, Yan (57732698100); Hu, Guo-Ying (57732945000); Qian, Chao-Yi (57732698200); Liang, Wei-Ren (57362175800); Zhao, Jun (57212211559); Wang, Xiao-Hong (57216702428)	54789708700; 57732698100; 57732945000; 57732698200; 57362175800; 57212211559; 57216702428	RNA m6A reader YTHDF1 facilitates inflammation via enhancing NLRP3 translation	2022	Biochemical and Biophysical Research Communications	10.1016/j.bbrc.2022.05.076	https://www.scopus.com/inward/record.uri?eid=2-s2.0-85131559366&doi=10.1016%2fj.bbrc.2022.05.076&partnerID=40&md5=70f42aebbe78c39836cd0a72c51fd6c5	Department of Intervention, Cancer Hospital of the University of Chinese Academy of Sciences (Zhejiang Cancer Hospital), Institute of Cancer and Basic Medicine (ICBM), Chinese Academy of Sciences, 1 East Banshan Road, Hangzhou, 310022, Zhejiang, China; Department of Intensive Care Unit, Zhejiang Medical & Health Group Hangzhou Hospital (Cooperative Hospital of Zhejiang Cancer Hospital), 1 Banshan…	N6-methyladenosine (m6A) modification of mRNAs is involved in multiple essential biological processes, dynamically regulated by m6A “writers”, “erasers”, and “readers”. Yet, the detailed functional roles of RNA m6A reader proteins, such as YTHDFs, are largely unknown. Herein we show that YTHDF1 promotes pro-inflammatory IL-1β production in macrophages during bacterial infections. YTHDF1 overexpre…	Inflammation; N<sup>6</sup>-methyladenosine; NLRP3; YTHDF1	Adenosine; Animals; Inflammation; Mice; NLR Family, Pyrin Domain-Containing 3 Protein; RNA; RNA-Binding Proteins; 6 n methyladenosine; cryopyrin; immunoglobulin enhancer binding protein; interleukin 1beta; RNA binding protein; unclassified drug; YTHDF1 protein; adenosine; cryopyrin; Nlrp3 protein, mouse; RNA; RNA binding protein; animal cell; animal experiment; animal model; Article; C57BL 6 mous…	Beverly J.K., Budoff M.J., Atherosclerosis: pathophysiology of insulin resistance, hyperglycemia, hyperlipidemia, and inflammation, J. Diabetes, 12, pp. 102-104, (2020); Crusz S.M., Balkwill F.R., Inflammation and cancer: advances and new agents, Nat. Rev. Clin. Oncol., 12, pp. 584-596, (2015); Kretschmer S., Lee-Kirsch M.A., Type I interferon-mediated autoinflammation and autoimmunity, Curr. Opi…	X.-H. Wang; Department of Intestinal Oncology, Cancer Hospital of the University of Chinese Academy of Sciences (Zhejiang Cancer Hospital), Institute of Cancer and Basic Medicine (ICBM), Chinese Academy of Sciences, Hangzhou, 1 East Banshan Road, 310022, China; email: xhwang2022@sina.com; J. Zhao; Department of Respiration and Critical Care Medicine, Zhejiang Medical & Health Group Hangzhou Hospi…	Elsevier B.V.	0006291X	BBRCA	35649302	English	Biochem. Biophys. Res. Commun.	Article		Scopus	2-s2.0-85131559366
Sun Z.; Chen W.; Wang Z.; Wang S.; Zan J.; Zheng L.; Zhao W.	Sun, Zewei (56108052100); Chen, Wenjing (57215686493); Wang, Zhen (57188819858); Wang, Shuai (56379183800); Zan, Jie (55797921400); Zheng, Liangrong (8229152000); Zhao, Wenting (57201116626)	56108052100; 57215686493; 57188819858; 56379183800; 55797921400; 8229152000; 57201116626	Matr3 reshapes m6A modification complex to alleviate macrophage inflammation during atherosclerosis	2022	Clinical Immunology	10.1016/j.clim.2022.109176	https://www.scopus.com/inward/record.uri?eid=2-s2.0-85141772452&doi=10.1016%2fj.clim.2022.109176&partnerID=40&md5=694316730ff0e3bb2254977ae9a9daca	Department of Cardiology, the First Affiliated Hospital, College of Medicine, Zhejiang University, No. 79 Qingchun road, Hangzhou, 310003, China; Center for Neuroscience and Department of Neurobiology of the Second Affiliated Hospital, State Key laboratory of Modern Optical Instrumentation, Zhejiang University School of Medicine, Hangzhou, 310058, China; Key Laboratory of Integrated Oncology and …	Atherosclerosis, characterized as the chronic inflammation of the arterial wall, is one of the leading causes of coronary artery disease (CAD), and macrophages are found to play essential roles in the initiation and progression of inflammation in atherosclerosis. N6-methyladenosine (m6A) modification, as the most abundant epi-transcriptomic modification in mRNA, is found to mediate the atherogeni…	Atherosclerosis; Macrophage; Matrin-3; Mettl14; N6-methyladenosine (m6A) modification	Atherosclerosis; Humans; Inflammation; Macrophages; Methyltransferases; Nuclear Matrix-Associated Proteins; RNA-Binding Proteins; 6 n methyladenosine; CD68 antigen; heterodimer; matrin 3; methyltransferase; methyltransferase like 3 protein; methyltransferase like 4 protein; mitogen activated protein kinase; oxidized low density lipoprotein; pentobarbital; RNA binding protein; small interfering RN…	Torres N., Guevara-Cruz M., Velazquez-Villegas L.A., Tovar A.R., Nutrition and atherosclerosis, Arch. Med. Res., 46, pp. 408-426, (2015); Rognoni A., Cavallino C., Veia A., Bacchini S., Rosso R., Facchini M., Secco G.G., Lupi A., Nardi F., Rametta F., Bongo A.S., Pathophysiology of atherosclerotic plaque development, Cardiovasc. Hematol. Agents Med. Chem., 13, pp. 10-13, (2015); Moore K.J., Sheed…	J. Zan; School of Biomedical and Pharmaceutical sciences, Guangdong University of Technology, Guangzhou, 510006, China; email: zanj@gdut.edu.cn	Academic Press Inc.	15216616	CLIIF	36368640	English	Clin. Immunol.	Article	All Open Access; Green Open Access	Scopus	2-s2.0-85141772452
Zhang H.; Gu Y.; Gang Q.; Huang J.; Xiao Q.; Ha X.	Zhang, Haocheng (58497403800); Gu, Yan (58497089000); Gang, Qiaojian (58496622700); Huang, Jing (58033495600); Xiao, Qian (58300492000); Ha, Xiaoqin (24398805300)	58497403800; 58497089000; 58496622700; 58033495600; 58300492000; 24398805300	N6-methyladenosine RNA modification: an emerging molecule in type 2 diabetes metabolism	2023	Frontiers in Endocrinology	10.3389/fendo.2023.1166756	https://www.scopus.com/inward/record.uri?eid=2-s2.0-85165295504&doi=10.3389%2ffendo.2023.1166756&partnerID=40&md5=d7d0e2735b6704365cdbadea13c8f6f9	The Second School of Clinical Medicine, Lanzhou University, Gansu, Lanzhou, China; Department of Clinical Laboratory, The 940th Hospital of Joint Logistics Support Force of Chinese People’s Liberation Army, Gansu, Lanzhou, China; Key Laboratory of Stem Cells and Gene Drugs of Gansu Province, Gansu, Lanzhou, China; College of Veterinary Medicine, Gansu Agricultural University, Gansu, Lanzhou, Chin…	Type 2 diabetes (T2D) is a metabolic disease with an increasing rate of incidence worldwide. Despite the considerable progress in the prevention and intervention, T2D and its complications cannot be reversed easily after diagnosis, thereby necessitating an in-depth investigation of the pathophysiology. In recent years, the role of epigenetics has been increasingly demonstrated in the disease, of …	insulin resistance; m6A modification; metabolism; signaling pathway; type 2 diabetes	6 n methyladenosine; alkylated DNA repair protein alkB homolog 5; alpha ketoglutarate dependent dioxygenase FTO; fat droplet; glycolipid; initiation factor 3; insulin; methyltransferase; methyltransferase 16; methyltransferase 4; methyltransferase 5; n demethylase; RNA binding protein; triacylglycerol; unclassified drug; zinc finger protein; adipose tissue; AMPK signaling; endoplasmic reticulum s…	IDF DIABETES ATLAS, (2021); Ke C., Narayan K.M.V., Chan J.C.N., Jha P., Shah B.R., Pathophysiology, phenotypes and management of type 2 diabetes mellitus in Indian and Chinese populations, Nat Rev Endocrinol, 18, 7, (2022); Tinajero M.G., Malik V.S., An update on the epidemiology of type 2 diabetes: a global perspective, Endocrinol Metab Clin North Am, 50, 3, (2021); Venter J.C., Adams M.D., Myer…	X. Ha; The Second School of Clinical Medicine, Lanzhou University, Lanzhou, Gansu, China; email: haxiaoqin2013@163.com	Frontiers Media SA	16642392			English	Front. Endocrinol.	Review	All Open Access; Gold Open Access	Scopus	2-s2.0-85165295504
Wan L.; Liu J.; Huang C.; Zhu Z.; Wang K.; Sun G.; Zhu L.; Hu Z.	Wan, Lei (57203799721); Liu, Jian (55705924500); Huang, Chuanbing (55582989800); Zhu, Ziheng (57954186900); Wang, Kun (57203498756); Sun, Guanghan (57216293845); Zhu, Lei (57953267500); Hu, Zhongxiang (57953267600)	57203799721; 55705924500; 55582989800; 57954186900; 57203498756; 57216293845; 57953267500; 57953267600	Comprehensive Analysis and Functional Characteristics of Differential Expression of N6-Methyladenosine Methylation Modification in the Whole Transcriptome of Rheumatoid Arthritis	2022	Mediators of Inflammation	10.1155/2022/4766992	https://www.scopus.com/inward/record.uri?eid=2-s2.0-85141267347&doi=10.1155%2f2022%2f4766992&partnerID=40&md5=3aa0129a8068cccf0275fc4d4f031c50	The First Affiliated Hospital of Anhui University of Chinese Medicine, Hefei, 230038, China; Key Laboratory of Xin'an Medical Education Ministry, Hefei, 230038, China; College of Traditional Chinese Medicine, Anhui University of Chinese Medicine, Hefei, 230012, China; The First Affiliated Hospital of University of Science and Technology of China, Hefei, 230000, China	N6-methyladenosine (m6A) modification is the most prevalent chemical modification in eukaryotic mRNA and is associated with the development of various immune diseases. However, the role of m6A methylation in rheumatoid arthritis (RA) development is unclear. We preliminarily explored the role of m6A methylation-related mRNAs in RA for its clinical application. The discovery of m6A methylation-modi…		Adenosine; Animals; Arthritis, Rheumatoid; Inflammation; Methylation; Phosphatidylinositol 3-Kinases; RNA, Messenger; Transcriptome; 6 n methyladenosine; adipocytokine; akt1 kinase; binding protein; citrulline; interleukin 17; interleukin 4; messenger RNA; mitogen activated protein kinase; neurexophilin 3; phosphatidylinositol 3 kinase; phosphatidylinositol 3,4,5 trisphosphate 3 phosphatase; phos…	Wu S., Li X.F., Wu Y.Y., Yin S.Q., Huang C., Li J., N6-methyladenosine and rheumatoid arthritis: a comprehensive review, Frontiers in Immunology, 127, (2021); Fan D., Xia Y., Lu C., Ye Q., Xi X., Wang Q., Wang Z., Wang C., Xiao C., Regulatory role of the RNA n(6)-methyladenosine modification in immunoregulatory cells and immune-related bone homeostasis associated with rheumatoid arthritis, Fronti…	L. Wan; The First Affiliated Hospital of Anhui University of Chinese Medicine, Hefei, 230038, China; email: yxwanlei@163.com	Hindawi Limited	9629351	MNFLE	36330380	English	Mediators Inflamm.	Article	All Open Access; Gold Open Access	Scopus	2-s2.0-85141267347
Meng Y.; Zhang Q.; Wang K.; Zhang X.; Yang R.; Bi K.; Chen W.; Diao H.	Meng, Yuting (57222269707); Zhang, Qiong (57039310200); Wang, Kaihang (57222273375); Zhang, Xujun (57207770030); Yang, Rongwei (57226314325); Bi, Kefan (57211235817); Chen, Wenbiao (56010679500); Diao, Hongyan (7004492039)	57222269707; 57039310200; 57222273375; 57207770030; 57226314325; 57211235817; 56010679500; 7004492039	RBM15-mediated N6-methyladenosine modification affects COVID-19 severity by regulating the expression of multitarget genes	2021	Cell Death and Disease	10.1038/s41419-021-04012-z	https://www.scopus.com/inward/record.uri?eid=2-s2.0-85111132753&doi=10.1038%2fs41419-021-04012-z&partnerID=40&md5=0c435e42b007668abb5d701bd2887290	State Key Laboratory for Diagnosis and Treatment of Infectious Diseases, National Clinical Research Center for Infectious Diseases, Collaborative Innovation Center for Diagnosis and Treatment of Infectious Diseases, The First Affiliated Hospital, College of Medicine, Zhejiang University, Hangzhou, China; Department of Clinical Engineering and Information Technology, The First Affiliated Hospital,…	Severe coronavirus disease 2019 (COVID-19) is characterized by symptoms of lymphopenia and multiorgan damage, but the underlying mechanisms remain unclear. To explore the function of N6-methyladenosine (m6A) modifications in COVID-19, we performed microarray analyses to comprehensively characterize the m6A epitranscriptome. The results revealed distinct global m6A profiles in severe and mild COVI…		Adenosine; Cell Line, Tumor; COVID-19; Epigenesis, Genetic; Female; Humans; Lymphocytes; Male; Middle Aged; RNA Processing, Post-Transcriptional; RNA-Binding Proteins; THP-1 Cells; Transcriptome; 6 n methyladenosine; methyltransferase; rbm15 protein; transcriptome; unclassified drug; adenosine; N-methyladenosine; RBM15 protein, human; RNA binding protein; transcriptome; adult; apoptosis; Article;…	Zhou P., Yang X.L., Wang X.G., Hu B., Zhang L., Zhang W., Et al., A pneumonia outbreak associated with a new coronavirus of probable bat origin, Nature, 579, pp. 270-273, (2020); Li Q., Guan X., Wu P., Wang X., Zhou L., Tong Y., Et al., Early transmission dynamics in Wuhan, China, of novel coronavirus-infected pneumonia, N Engl J Med, 382, pp. 1199-1207, (2020); Chen L., Liu W., Zhang Q., Xu K., …	H. Diao; State Key Laboratory for Diagnosis and Treatment of Infectious Diseases, National Clinical Research Center for Infectious Diseases, Collaborative Innovation Center for Diagnosis and Treatment of Infectious Diseases, The First Affiliated Hospital, College of Medicine, Zhejiang University, Hangzhou, China; email: diaohy@zju.edu.cn	Springer Nature	20414889		34301919	English	Cell Death Dis.	Article	All Open Access; Gold Open Access	Scopus	2-s2.0-85111132753
Wang S.; Gao S.; Zeng Y.; Zhu L.; Mo Y.; Wong C.C.; Bao Y.; Su P.; Zhai J.; Wang L.; Soares F.; Xu X.; Chen H.; Hezaveh K.; Ci X.; He A.; McGaha T.; O'Brien C.; Rottapel R.; Kang W.; Wu J.; Zheng G.; Cai Z.; Yu J.; He H.H.	Wang, Shiyan (35977139200); Gao, Shanshan (57204179336); Zeng, Yong (57204183740); Zhu, Lin (57222274132); Mo, Yulin (57220072134); Wong, Chi Chun (55601694500); Bao, Yi (57454274200); Su, Peiran (57205471995); Zhai, Jianning (57210416733); Wang, Lina (57213184130); Soares, Fraser (57190666632); Xu, Xin (57205467367); Chen, Huarong (37119896400); Hezaveh, Kebria (56736917800); Ci, Xinpei (5601743…	35977139200; 57204179336; 57204183740; 57222274132; 57220072134; 55601694500; 57454274200; 57205471995; 57210416733; 57213184130; 57190666632; 57205467367; 37119896400; 56736917800; 56017433800; 57453913600; 6602421272; 26537964000; 7004089740; 41761487100; 55553638800; 35235894000; 7402904946; 35351306800; 35995538800	N6-Methyladenosine Reader YTHDF1 Promotes ARHGEF2 Translation and RhoA Signaling in Colorectal Cancer	2022	Gastroenterology	10.1053/j.gastro.2021.12.269	https://www.scopus.com/inward/record.uri?eid=2-s2.0-85124646966&doi=10.1053%2fj.gastro.2021.12.269&partnerID=40&md5=babdceb72538134013b18e439de252da	Princess Margaret Cancer Centre/University Health Network, Toronto, ON, Canada; Institute of Digestive Disease and Department of Medicine and Therapeutics, State Key Laboratory of Digestive Disease, Li Ka Shing Institute of Health Sciences, CUHK Shenzhen Research Institute, The Chinese University of Hong Kong, Hong Kong, Hong Kong; State Key Laboratory of Environmental and Biological Analysis, De…	Background & Aims: N6-methyladenosine (m6A) governs the fate of RNAs through m6A readers. Colorectal cancer (CRC) exhibits aberrant m6A modifications and expression of m6A regulators. However, how m6A readers interpret oncogenic m6A methylome to promote malignant transformation remains to be illustrated. Methods: YTH N6-methyladenosine RNA binding protein 1 (Ythdf1) knockout mouse was generated t…	ARHGEF2; Colorectal Cancer; N6-Methyladenosine; Nanoparticle; YTHDF1	Adenosine; Animals; Carcinogenesis; Colorectal Neoplasms; Gene Expression Regulation, Neoplastic; Humans; Liposomes; Mice; Nanoparticles; Rho Guanine Nucleotide Exchange Factors; rhoA GTP-Binding Protein; RNA, Small Interfering; RNA-Binding Proteins; 6 n methyladenosine; lipid nanoparticle; messenger RNA; n 6 methyladenosine a rho rac guanine nucleotide exchange factor 2; RhoA guanine nucleotide …	Siegel R.L., Miller K.D., Goding Sauer A., Et al., Colorectal cancer statistics, 2020, CA Cancer J Clin, 70, pp. 145-164, (2020); Davis L.E., The evolution of biomarkers to guide the treatment of metastatic colorectal cancer, Am J Manag Care, 24, pp. S107-S117, (2018); Engstrand J., Nilsson H., Stromberg C., Et al., Colorectal cancer liver metastases—a population-based study on incidence, managem…	H.H. He; Department of Medical Biophysics, University of Toronto, 101 College Street, TMDT 11-305, Toronto, M5G 1L7, Canada; email: hansenhe@uhnresearch.ca; J. Yu; Department of Medicine and Therapeutics, Institute of Digestive Disease, Chinese University of Hong Kong Room 707, Li Ka Shing Medical Sciences, Building, Prince of Wales Hospital, Hong Kong, Hong Kong; email: junyu@cuhk.edu.hk	W.B. Saunders	165085	GASTA	34968454	English	Gastroenterology	Article	All Open Access; Hybrid Gold Open Access	Scopus	2-s2.0-85124646966
Zhang F.; Ran Y.; Tahir M.; Li Z.; Wang J.; Chen X.	Zhang, Fangfang (57211686161); Ran, Yuanyuan (55964354500); Tahir, Muhammad (59102418000); Li, Zihan (57849555300); Wang, Jianan (59292744000); Chen, Xuechai (17433353400)	57211686161; 55964354500; 59102418000; 57849555300; 59292744000; 17433353400	Regulation of N6-methyladenosine (m6A) RNA methylation in microglia-mediated inflammation and ischemic stroke	2022	Frontiers in Cellular Neuroscience	10.3389/fncel.2022.955222	https://www.scopus.com/inward/record.uri?eid=2-s2.0-85136174067&doi=10.3389%2ffncel.2022.955222&partnerID=40&md5=28d10185d55a7692dbf742ce89f111af	Beijing International Science and Technology Cooperation Base for Antiviral Drugs, Faculty of Environment and Life, Beijing University of Technology, Beijing, China; Department of Rehabilitation, Beijing Rehabilitation Hospital, Capital Medical University, Beijing, China	N6-methyladenosine (m6A) is the most abundant post-transcription modification, widely occurring in eukaryotic mRNA and non-coding RNA. m6A modification is highly enriched in the mammalian brain and is associated with neurological diseases like Alzheimer’s disease (AD) and Parkinson’s disease (PD). Ischemic stroke (IS) was discovered to alter the cerebral m6A epi-transcriptome, which might have fu…	ischemic stroke; microglia; neuroinflammation; polarization; RNA methylation	6 n methyladenosine; AlkB Homolog 5; histone demethylase; hypoxia inducible factor 1alpha; immunoglobulin enhancer binding protein; inducible nitric oxide synthase; interleukin 1; interleukin 10; interleukin 1beta; interleukin 6; Janus kinase; long untranslated RNA; messenger RNA; methyltransferase; methyltransferases 3; methyltransferases 4; microRNA; mRNA335; nitric oxide; peroxisome proliferat…	Alawieh A., Elvington A., Tomlinson S., Complement in the homeostatic and ischemic brain, Front. Immunol, 6, 417, (2015); Allen I.C., Moore C.B., Schneider M., Lei Y., Davis B.K., Scull M.A., Et al., NLRX1 protein attenuates inflammatory responses to infection by interfering with the RIG-I-MAVS and TRAF6-NF-kappaB signaling pathways, Immunity, 34, pp. 854-865, (2011); Aramburu-Nunez M., Custodia …	X. Chen; Beijing International Science and Technology Cooperation Base for Antiviral Drugs, Faculty of Environment and Life, Beijing University of Technology, Beijing, China; email: chenxuechai@bjut.edu.cn	Frontiers Media S.A.	16625102			English	Front. Cell. Neurosci.	Review	All Open Access; Gold Open Access	Scopus	2-s2.0-85136174067
Chen L.-H.; Zhao Y.-Y.; Huang L.; Li Y.-Z.; Xu H.-Q.; Yang C.; Zhang C.	Chen, L.-H. (57220004047); Zhao, Y.-Y. (57220005459); Huang, L. (57221165812); Li, Y.-Z. (57438201500); Xu, H.-Q. (57479166500); Yang, C. (57210211505); Zhang, Chi (57221300995)	57220004047; 57220005459; 57221165812; 57438201500; 57479166500; 57210211505; 57221300995	The potential roles of RNA N6-methyladenosine in atherosclerosis	2022	European Review for Medical and Pharmacological Sciences	10.26355/eurrev_202202_28096	https://www.scopus.com/inward/record.uri?eid=2-s2.0-85125840323&doi=10.26355%2feurrev_202202_28096&partnerID=40&md5=3d79429810e62814cf6db07b2c479fb1	Institute of Cardiovascular Disease, Key Lab for Arteriosclerology of Hunan Province, Hengyang Medical College, University of South China, Hunan, Hengyang, China; Research Laboratory of Translational Medicine, Hengyang Medical College, University of South China, Hunan, Hengyang, China	Objective: Atherosclerosis, characterized by endothelial injury, multicellular involvement, chronic inflammation, and lipid deposition, can lead to acute cardiovascular events. N6-methyladenosine (m6A) is the most abundant, prevalent RNA modification in mammalian cells. m6A, a reversible modification, can be catalyzed by m6A methyltransferase complexes (writers), reverted by demethylases (erasers…	Atherosclerosis; Inflammation; Lipid metabolism; N<sup>6</sup>-Methyladenosine; Vascular calcification	Adenosine; Animals; Atherosclerosis; Inflammation; Mammals; RNA; 6 n methyladenosine; adenosine; N-methyladenosine; RNA; Article; atherosclerosis; blood vessel calcification; clinical outcome; cytoplasm; disease exacerbation; down regulation; human; inflammation; lipid metabolism; macrophage; phenotype; RNA degradation; smooth muscle cell; systematic review; treatment planning; upregulation; vasc…	Herrington W, Lacey B, Sherliker P, Armitage J, Lewington S., Epidemiology of Atherosclerosis and the Potential to Reduce the Global Burden of Atherothrombotic Disease, Circ Res, 118, pp. 535-546, (2016); Wang X, Zhao BS, Roundtree IA, Lu Z, Han D, Ma H, Weng X, Chen K, Shi H, He C., N(6)-methyladenosine Modulates Messenger RNA Translation Efficiency, Cell, 161, pp. 1388-1399, (2015); Desrosiers …	C. Zhang; Institute of Cardiovascular Disease, Key Lab for Arteriosclerology of Hunan Province, Hengyang Medical College, University of South China, Hengyang, Hunan, China; email: zhangchi9966@hotmail.com	Verduci Editore s.r.l	11283602	RESFD	35253196	English	Eur. Rev. Med. Pharmacol. Sci.	Article		Scopus	2-s2.0-85125840323
Phillips S.; Mishra T.; Khadka S.; Bohan D.; Espada C.E.; Maury W.; Wu L.	Phillips, Stacia (57200929144); Mishra, Tarun (57220901977); Khadka, Shaubhagya (57952557200); Bohan, Dana (57212304001); Espada, Constanza E. (35198054700); Maury, Wendy (6701522258); Wu, Li (8618757800)	57200929144; 57220901977; 57952557200; 57212304001; 35198054700; 6701522258; 8618757800	Epitranscriptomic N6-Methyladenosine Profile of SARS-CoV-2-Infected Human Lung Epithelial Cells	2023	Microbiology Spectrum	10.1128/spectrum.03943-22	https://www.scopus.com/inward/record.uri?eid=2-s2.0-85148114287&doi=10.1128%2fspectrum.03943-22&partnerID=40&md5=a66e0746e5d937372bbcf23833f6655b	Department of Microbiology and Immunology, Carver College of Medicine, University of Iowa, Iowa City, IA, United States	N6-methyladenosine (m6A) is a dynamic posttranscriptional RNA modification that plays an important role in determining transcript fate. The functional consequence of m6A deposition is dictated by a group of host proteins that specifically recognize and bind the m6A modification, leading to changes in RNA stability, transport, splicing, or translation. The cellular m6A methylome undergoes changes …	epitranscriptomics; infection; lung epithelial cells; microarray; N<sup>6</sup>-methyladenosine; SARS-CoV-2	COVID-19; Epithelial Cells; Humans; Interferons; Lung; RNA; SARS-CoV-2; 6 n methyladenosine; messenger RNA; microRNA; microRNA 4486; protein; small untranslated RNA; unclassified drug; interferon; N-methyladenosine; RNA; Article; cell death; cell proliferation; cellular immunity; controlled study; coronavirus disease 2019; cytokine signaling; endoplasmic reticulum; epithelium cell; epitranscripto…	Liu J, Yue Y, Han D, Wang X, Fu Y, Zhang L, Jia G, Yu M, Lu Z, Deng X, Dai Q, Chen W, He C., A METTL3-METTL14 complex mediates mammalian nuclear RNA N6-adenosine methylation, Nat Chem Biol, 10, pp. 93-95, (2014); Warda AS, Kretschmer J, Hackert P, Lenz C, Urlaub H, Hobartner C, Sloan KE, Bohnsack MT., Human METTL16 is a N(6)-methyladenosine (m(6)A) methyltransferase that targets pre-mRNAs and var…	L. Wu; Department of Microbiology and Immunology, Carver College of Medicine, University of Iowa, Iowa City, United States; email: li-wu@uiowa.edu	American Society for Microbiology	21650497		36625663	English	Microbiol. Spectr.	Article	All Open Access; Gold Open Access	Scopus	2-s2.0-85148114287
Wang Y.; Liu J.; Wang Y.	Wang, Youlin (58527569400); Liu, Jing (57188819806); Wang, Yongchen (36465934500)	58527569400; 57188819806; 36465934500	Role of TNF-α-induced m6A RNA methylation in diseases: a comprehensive review	2023	Frontiers in Cell and Developmental Biology	10.3389/fcell.2023.1166308	https://www.scopus.com/inward/record.uri?eid=2-s2.0-85167342352&doi=10.3389%2ffcell.2023.1166308&partnerID=40&md5=03c6b32d90f3192dc10884a71b00f796	Department of Dermatology, The Second Affiliated Hospital of Harbin Medical University, Heilongjiang, Harbin, China; General Practice Department, The Second Affiliated Hospital of Harbin Medical University, Heilongjiang, Harbin, China	Tumor Necrosis Factor-alpha (TNF-α) is ubiquitous in the human body and plays a significant role in various physiological and pathological processes. However, TNF-α-induced diseases remain poorly understood with limited efficacy due to the intricate nature of their mechanisms. N6-methyladenosine (m6A) methylation, a prevalent type of epigenetic modification of mRNA, primarily occurs at the post-t…	autoimmune disease; immunity; N6-methyladenosine (m6A); signaling pathway; TNF-α	6 n methyladenosine; RNA; tumor necrosis factor; autoimmune disease; diseases; human; inflammatory disease; neoplasm; nonhuman; Review; RNA methylation; TNF signaling	Adegbola S.O., Sahnan K., Warusavitarne J., Hart A., Tozer P., Anti-TNF therapy in crohn's disease, Int. J. Mol. Sci, 19, 8, (2018); Alarcon C.R., Goodarzi H., Lee H., Liu X., Tavazoie S., Tavazoie S.F., HNRNPA2B1 is a mediator of m(6)a-dependent nuclear RNA processing events, Cell, 162, 6, pp. 1299-1308, (2015); Alarcon C.R., Lee H., Goodarzi H., Halberg N., Tavazoie S.F., N6-methyladenosine mar…	Y. Wang; Department of Dermatology, The Second Affiliated Hospital of Harbin Medical University, Harbin, Heilongjiang, China; email: yongchenwang@163.com	Frontiers Media SA	2296634X			English	Front. Cell Dev. Biol.	Review	All Open Access; Gold Open Access	Scopus	2-s2.0-85167342352
Ni W.-J.; Lu H.; Ma N.-N.; Hou B.-B.; Zeng J.; Zhou H.; Shao W.; Meng X.-M.	Ni, Wei-Jian (56374185300); Lu, Hao (57782459900); Ma, Nan-Nan (57938098500); Hou, Bing-Bing (57210444893); Zeng, Jing (57408802300); Zhou, Hong (56645177800); Shao, Wei (57196084100); Meng, Xiao-Ming (36544115700)	56374185300; 57782459900; 57938098500; 57210444893; 57408802300; 56645177800; 57196084100; 36544115700	RNA N6-methyladenosine modifications and potential targeted therapeutic strategies in kidney disease	2023	British Journal of Pharmacology	10.1111/bph.15968	https://www.scopus.com/inward/record.uri?eid=2-s2.0-85140399929&doi=10.1111%2fbph.15968&partnerID=40&md5=1fa0c29d7cdad297caa0325e4a60a366	Department of Pharmacy, Anhui Provincial Hospital, The First Affiliated Hospital of USTC, Division of Life Sciences and Medicine, University of Science and Technology of China, Anhui, Hefei, 230001, China; Inflammation and Immune Mediated Diseases Laboratory of Anhui Province, Anhui Institute of Innovative Drugs, School of Pharmacy, Anhui Medical University, Anhui, Hefei, 230032, China; Anhui Pro…	Epigenetic modifications have received increasing attention and have been shown to be extensively involved in kidney development and disease progression. Among them, the most common RNA modification, N6-methyladenosine (m6A), has been shown to dynamically and reversibly exert its functions in multiple ways, including splicing, export, decay and translation initiation efficiency to regulate mRNA f…	acute kidney injury; chronic kidney disease; N<sup>6</sup>-methyladenosine; renal cell carcinoma; RNA epigenetic modification; targeted therapy	Acute Kidney Injury; Carcinoma, Renal Cell; Humans; Kidney Neoplasms; RNA; RNA, Messenger; 6 n methyladenosine; alkylated DNA repair protein alkB homolog 5; alpha ketoglutarate dependent dioxygenase FTO; methyltransferase; methyltransferase like 14; methyltransferase like 3; RNA; RNA binding motif protein 15; RNA binding protein; somatomedin binding protein 2; tumor protein; unclassified drug; Wi…	Alarcon C.R., Lee H., Goodarzi H., Halberg N., Tavazoie S.F., N6-methyladenosine marks primary microRNAs for processing, Nature, 519, 7544, pp. 482-485, (2015); Alexander S.P., Kelly E., Mathie A., Peters J.A., Veale E.L., Armstrong J.F., Faccenda E., Harding S.D., Pawson A.J., Southan C., Buneman O.P., Cidlowski J.A., Christopoulos A., Davenport A.P., Fabbro D., Spedding M., Striessnig J., Davie…	X.-M. Meng; Inflammation and Immune Mediated Diseases Laboratory of Anhui Province, Anhui Institute of Innovative Drugs, School of Pharmacy, Anhui Medical University, Hefei, No. 81 Meishan Road, Anhui, 230032, China; email: mengxiaoming@ahmu.edu.cn; W. Shao; School of Basic Medicine, Anhui Medical University, Hefei, No. 81 Meishan Road, Anhui, 230032, China; email: ShaoWei@ahmu.edu.cn	John Wiley and Sons Inc	71188	BJPCB	36196023	English	Br. J. Pharmacol.	Review		Scopus	2-s2.0-85140399929
Qian W.; Cao Y.	Qian, Weiwei (57994372500); Cao, Yu (24775284700)	57994372500; 24775284700	An overview of the effects and mechanisms of m6 A methylation on innate immune cells in sepsis	2022	Frontiers in Immunology	10.3389/fimmu.2022.1041990	https://www.scopus.com/inward/record.uri?eid=2-s2.0-85143410995&doi=10.3389%2ffimmu.2022.1041990&partnerID=40&md5=1536c8d47d2233e49ef933d83257e1a4	Emergency Department, Shangjinnanfu Hospital, West China Hospital, Sichuan University, Sichuan, Chengdu, China; Emergency Department of West China Hospital, Sichuan University, Sichuan, Chengdu, China	Introduction: Sepsis is a severe clinical syndrome caused by dysregulated systemic inflammatory responses to infection. Methylation modification, as a crucial mechanism of RNA functional modification, can manipulate the immunophenotype and functional activity of immune cells to participate in sepsis progression. This study aims to explore the mechanism of N6-methyladenosine (m6A) methylation modi…	immune cells; inflammation; m<sup>6</sup>A methylation; oxidative stress; sepsis	Extracellular Traps; Humans; Phagocytosis; Protein Processing, Post-Translational; Sepsis; Sepsis-Associated Encephalopathy; 6 n methyladenosine; histone deacetylase 4; interleukin 6; interleukin 8; acute kidney failure; Article; brain disease; electroencephalogram; heart muscle injury; human; immunocompetent cell; macrophage; natural killer cell; neutrophil; oxidative stress; RNA stability; RNA …	Peng Z., Xu J., He Y., Sun D., Shang Y., Research advances of myeloid-derived suppressor cells in sepsis-induced immunosuppression, Zhonghua Wei Zhong Bing Ji Jiu Yi Xue, 34, (2022); Lu X., Yang Y., Lu Y., Immunosenescence: A critical factor associated with organ injury after sepsis, Front Immunol, 13, (2022); Bi C.F., Liu J., Yang L.S., Zhang J.F., Research progress on the mechanism of sepsis in…	Y. Cao; Emergency Department of West China Hospital, Sichuan University, Chengdu, Sichuan, China; email: yuyuer@126.com	Frontiers Media S.A.	16643224		36505499	English	Front. Immunol.	Article	All Open Access; Gold Open Access; Green Open Access	Scopus	2-s2.0-85143410995
Zhang C.; Wang Y.; Peng Y.; Xu H.; Zhou X.	Zhang, Chenjing (51666096100); Wang, Yin (56389673600); Peng, Yunan (55899027200); Xu, Hongjiao (57193458301); Zhou, Xuelong (56168521400)	51666096100; 56389673600; 55899027200; 57193458301; 56168521400	METTL3 regulates inflammatory pain by modulating m6A-dependent pri-miR-365-3p processing	2020	FASEB Journal	10.1096/fj.201901555R	https://www.scopus.com/inward/record.uri?eid=2-s2.0-85077738943&doi=10.1096%2ffj.201901555R&partnerID=40&md5=2e49b8cc29bf8c89c49f40e1a0c16a74	Department of Gastroenterology, Zhejiang Province People's Hospital, Hangzhou, China; Department of Anesthesiology, Taizhou People's Hospital, Taizhou, China; Department of Anesthesiology, Affiliated Drum Tower Hospital of Nanjing University Medical School, Nanjing, China; Department of Anesthesiology, the First People's Hospital of Shanghai Transportation University, Shanghai, China; Department …	N6-methyladenosine (m6A) modification in RNA has been implicated in diverse biological processes. However, very little is currently known about its role in nociceptive modulation. Here, we found that the level of spinal m6A modification was significantly increased in a mouse model of Complete Freund's Adjuvant (CFA)-induced chronic inflammatory pain, which was accompanied with the augmentation of…	central sensitization; inflammatory pain; METTL3; N<sup>6</sup>-methyladenosine; spinal cord	Animals; Fluorescent Antibody Technique; Gene Expression Regulation; Immunohistochemistry; Immunoprecipitation; In Situ Hybridization, Fluorescence; Inflammation; Male; Membrane Glycoproteins; Methyltransferases; Mice; Mice, Inbred C57BL; MicroRNAs; Nerve Tissue Proteins; Pain; RNA; RNA-Binding Proteins; 6 n methyladenosine; DiGeorge protein; Freund adjuvant; lentivirus vector; messenger RNA; met…	Boccaletto P., Machnicka M.A., Purta E., Et al., MODOMICS: a database of RNA modification pathways, Nucleic Acids Res, 46, pp. D303-D307, (2018); Sun W.J., Li J.H., Liu S., Et al., RMBase: a resource for decoding the landscape of RNA modifications from high-throughput sequencing data, Nucleic Acids Res, 44, pp. 259-265, (2016); Li S., Mason C.E., The pivotal regulatory landscape of RNA modificati…	X. Zhou; Department of Anesthesiology, the First Affiliated Hospital of Nanjing Medical University, Nanjing, China; email: zhouxuelong0258@126.com	John Wiley and Sons Inc.	8926638	FAJOE	31914601	English	FASEB J.	Article		Scopus	2-s2.0-85077738943
Sun J.; Cheng B.; Su Y.; Li M.; Ma S.; Zhang Y.; Zhang A.; Cai S.; Bao Q.; Wang S.; Zhu P.	Sun, Jin (57226245755); Cheng, Bokai (57226251829); Su, Yongkang (57226252960); Li, Man (57201391163); Ma, Shouyuan (57193214228); Zhang, Yan (57191833390); Zhang, Anhang (57226244548); Cai, Shuang (57226258152); Bao, Qiligeer (57226258605); Wang, Shuxia (57202355403); Zhu, Ping (56683874600)	57226245755; 57226251829; 57226252960; 57201391163; 57193214228; 57191833390; 57226244548; 57226258152; 57226258605; 57202355403; 56683874600	The Potential Role of m6A RNA Methylation in the Aging Process and Aging-Associated Diseases	2022	Frontiers in Genetics	10.3389/fgene.2022.869950	https://www.scopus.com/inward/record.uri?eid=2-s2.0-85129488694&doi=10.3389%2ffgene.2022.869950&partnerID=40&md5=7c552f81c4dc3818563a8dda0cabf0bd	Department of Geriatrics, The Second Medical Center and National Clinical Research Center for Geriatric Diseases, Chinese PLA General Hospital, Beijing, China; Medical School of Chinese PLA, Beijing, China; Department of Geriatric Cardiology, The Second Medical Center, Chinese PLA General Hospital, Beijing, China; Department of Outpatient, The First Medical Center, Chinese PLA General Hospital, B…	N6-methyladenosine (m6A) is the most common and conserved internal eukaryotic mRNA modification. m6A modification is a dynamic and reversible post-transcriptional regulatory modification, initiated by methylase and removed by RNA demethylase. m6A-binding proteins recognise the m6A modification to regulate gene expression. Recent studies have shown that altered m6A levels and abnormal regulator ex…	aging; aging-related disease; epigenetics; N6-methyladenosine; RNA methylation	6 n methyladenosine; messenger RNA; RNA demethylase; RNA methyltransferase; unclassified drug; unclassified enzyme; aging; Alzheimer disease; atherosclerosis; autophagy (cellular); bladder cancer; breast cancer; cancer growth; carcinogenesis; cardiovascular disease; cell aging; colon cancer; colorectal cancer; degenerative disease; diabetes mellitus; disease exacerbation; DNA damage; endometrium …	Agarwala S.D., Blitzblau H.G., Hochwagen A., Fink G.R., RNA Methylation by the MIS Complex Regulates a Cell Fate Decision in Yeast, Plos Genet, 8, 6, (2012); Aik W., Scotti J.S., Choi H., Gong L., Demetriades M., Schofield C.J., Et al., Structure of Human RNA N6-Methyladenine Demethylase ALKBH5 Provides Insights into its Mechanisms of Nucleic Acid Recognition and Demethylation, Nucleic Acids Res,…	S. Wang; Department of Geriatrics, The Second Medical Center and National Clinical Research Center for Geriatric Diseases, Chinese PLA General Hospital, Beijing, China; email: wangsx301@163.com; P. Zhu; Department of Geriatrics, The Second Medical Center and National Clinical Research Center for Geriatric Diseases, Chinese PLA General Hospital, Beijing, China; email: zhuping301hospital@163.com	Frontiers Media S.A.	16648021			English	Front. Genet.	Review	All Open Access; Gold Open Access; Green Open Access	Scopus	2-s2.0-85129488694
Chen Y.-S.; Ouyang X.-P.; Yu X.-H.; Novák P.; Zhou L.; He P.-P.; Yin K.	Chen, Ye-shi (57205182391); Ouyang, Xin-ping (59157715500); Yu, Xiao-hua (26428634300); Novák, Petr (57217488620); Zhou, Le (57219651219); He, Ping-ping (55539813400); Yin, Kai (57203336229)	57205182391; 59157715500; 26428634300; 57217488620; 57219651219; 55539813400; 57203336229	N6-Adenosine Methylation (m6A) RNA Modification: an Emerging Role in Cardiovascular Diseases	2021	Journal of Cardiovascular Translational Research	10.1007/s12265-021-10108-w	https://www.scopus.com/inward/record.uri?eid=2-s2.0-85101773523&doi=10.1007%2fs12265-021-10108-w&partnerID=40&md5=9b31a6781c53a5eb0015cca7b9d428ad	School of Nursing, University of South China, Hengyang, 421001, Hunan, China; Hengyang Key Laboratory of Neurodegeneration and Cognitive Impairment, Department of Physiology, The Neuroscience Institute, Hengyang Medical College, University of South China, Hengyang, 421001, Hunan, China; Hunan Province Cooperative Innovation Center for Molecular Target New Drug Study, University of South China, He…	N6-methyladenosine (m6A) is the most abundant and prevalent epigenetic modification of mRNA in mammals. This dynamic modification is regulated by m6A methyltransferases and demethylases, which control the fate of target mRNAs through influencing splicing, translation and decay. Recent studies suggest that m6A modification plays an important role in the progress of cardiac remodeling and cardiomyo…	Cardiovascular diseases; Demethylase; Epitranscriptomics; Methyltransferase; N6-methyladenosine (m<sup>6</sup>A)	Adenosine; Animals; Cardiovascular Diseases; Diabetes Mellitus, Type 2; Methylation; RNA, Messenger; 6 n methyladenosine; binding protein; methyltransferase; n demethylase; adenosine; messenger RNA; adipogenesis; atherosclerosis; cardiovascular disease; cardiovascular risk factor; congenital heart disease; disease exacerbation; epigenetic modification; gene function; genetic modification; heart f…	Kim T.K., Gore S.D., Zeidan A.M., Epigenetic therapy in acute myeloid leukemia: current and future directions, Seminars in Hematology, 52, pp. 172-183, (2015); Wu X., Sang L., Gong Y., N6-methyladenine RNA modification and cancers, American Journal of Cancer Research, 8, pp. 1957-1966, (2018); Roundtree I.A., Evans M.E., Pan T., He C., Dynamic RNA modifications in gene expression regulation, Cell…	P.-P. He; Hunan Province Cooperative Innovation Center for Molecular Target New Drug Study, University of South China, Hengyang, 421001, China; email: hpp-612@163.com; K. Yin; Guangxi Key Laboratory of Diabetic Systems Medicine, The Second Affiliated Hospital of Guilin Medical University, Guilin Medical University, Guilin, 541100, China; email: Kaiyinby@qq.com	Springer	19375387		33630241	English	J. Cardiovasc. Transl. Res.	Review		Scopus	2-s2.0-85101773523
Luo Y.; Zhang Z.; Xiang L.; Zhou B.; Wang X.; Lin Y.; Ding X.; Liu F.; Lu Y.; Peng Y.	Luo, Yunchen (57383097300); Zhang, Zhijian (55565863900); Xiang, Liping (57217702919); Zhou, Bing (57217702142); Wang, Xuejiao (57188861407); Lin, Yi (57213943357); Ding, Xiaoying (36113190600); Liu, Fang (57079374200); Lu, Yan (57198798492); Peng, Yongde (7403419023)	57383097300; 55565863900; 57217702919; 57217702142; 57188861407; 57213943357; 36113190600; 57079374200; 57198798492; 7403419023	Analysis of N6-Methyladenosine Methylation Modification in Fructose-Induced Non-Alcoholic Fatty Liver Disease	2021	Frontiers in Endocrinology	10.3389/fendo.2021.780617	https://www.scopus.com/inward/record.uri?eid=2-s2.0-85121609324&doi=10.3389%2ffendo.2021.780617&partnerID=40&md5=476f6b77351d62def3bc2d86ab4afa68	Department of Endocrinology and Metabolism, Shanghai General Hospital, Shanghai Jiao Tong University School of Medicine, Shanghai, China; Department of Endocrinology and Metabolism, Zhongshan Hospital, Fudan University, Shanghai, China	Improvements in living standards have led to non-alcoholic fatty liver disease (NAFLD), one of the most common chronic liver diseases worldwide. Recent studies have shown that N6-methyladenosine (m6A), a type of RNA modification, is strongly associated with many important biological processes. However, the relationship between m6A methylation modifications and NAFLD remains poorly understood. In …	fructose; lipid metabolism; N6-methyladenosine; non-alcoholic fatty liver disease; RNA methylation	6 n methyladenosine; alanine aminotransferase; aspartate aminotransferase; atp binding cassette subfamily d member 2; CD36 antigen; cholesterol; elovl fatty acid elongase 5; fructose; leptin receptor; protein; RNA binding protein; transcriptome; triacylglycerol; unclassified drug; 3' untranslated region; animal experiment; animal model; animal tissue; Article; biochemical analysis; bioinformatics…	Mundi M.S., Velapati S., Patel J., Kellogg T.A., Abu Dayyeh B.K., Hurt R.T., Evolution of NAFLD and Its Management, Nutr Clin Pract, 35, 1, pp. 72-84, (2020); Younossi Z., Anstee Q.M., Marietti M., Hardy T., Henry L., Eslam M., Et al., Global Burden of NAFLD and NASH: Trends, Predictions, Risk Factors and Prevention, Nat Rev Gastroenterol Hepatol, 15, 1, pp. 11-20, (2018); Fabbrini E., Sullivan S…	Y. Peng; Department of Endocrinology and Metabolism, Shanghai General Hospital, Shanghai Jiao Tong University School of Medicine, Shanghai, China; email: pengyongde0908@126.com; Y. Lu; Department of Endocrinology and Metabolism, Zhongshan Hospital, Fudan University, Shanghai, China; email: lu.yan2@zs-hospital.sh.cn	Frontiers Media S.A.	16642392			English	Front. Endocrinol.	Article	All Open Access; Gold Open Access; Green Open Access	Scopus	2-s2.0-85121609324
Wen X.; Wang J.; Wang Q.; Liu P.; Zhao H.	Wen, Xiaodong (57207035213); Wang, Junhu (57190254516); Wang, Qiong (58888204100); Liu, Peilong (57204606664); Zhao, Hongmou (37002146200)	57207035213; 57190254516; 58888204100; 57204606664; 37002146200	Interaction between N6-methyladenosine and autophagy in the regulation of bone and tissue degeneration	2022	Frontiers in Bioengineering and Biotechnology	10.3389/fbioe.2022.978283	https://www.scopus.com/inward/record.uri?eid=2-s2.0-85137850167&doi=10.3389%2ffbioe.2022.978283&partnerID=40&md5=733f6f644e2c8d011dee6d3bc4eac7b1	Department of Foot and Ankle Surgery, Honghui Hospital of Xi’an Jiaotong University, Xi’an, China	Bone and tissue degeneration are the most common skeletal disorders that seriously affect people’s quality of life. N6-methyladenosine (m6A) is one of the most common RNA modifications in eukaryotic cells, affecting the alternative splicing, translation, stability and degradation of mRNA. Interestingly, increasing number of evidences have indicated that m6A modification could modulate the express…	autophagy; degenerative; disease; M6A; mRNA; osteoporosis	Cell death; Crosstalk; 'current; Alternative splicing; Autophagy; Degenerative; Eukaryotic cells; In-depth knowledge; M6A; MRNA; Osteoporosis; Quality of life; Bone	Affortit C., Blanc F., Nasr J., Ceccato J.C., Markossian S., Guyot R., Et al., A disease-associated mutation in thyroid hormone receptor α1 causes hearing loss and sensory hair cell patterning defects in mice, Sci. Signal, 15, (2022); Chen L., Zhang M., Chen P., Xiong X.F., Liu P.Q., Wang H.B., Et al., The m6A demethylase FTO promotes the osteogenesis of mesenchymal stem cells by downregulating P…	H. Zhao; Department of Foot and Ankle Surgery, Honghui Hospital of Xi’an Jiaotong University, Xi’an, China; email: zhaohongmou@xiyi.edu.cn	Frontiers Media S.A.	22964185			English	Front. Bioeng. Biotechnol.	Review	All Open Access; Gold Open Access	Scopus	2-s2.0-85137850167
Li Z.; Zhang L.; Jiang Y.; Lin X.; Liao Y.; Yang B.; Teng M.	Li, Zhijia (57117136100); Zhang, Litian (57604963800); Jiang, Yinbo (57604708500); Lin, Xiaoxin (58119742800); Liao, Yuhui (55801795700); Yang, Bin (57204140159); Teng, Muzhou (57219940989)	57117136100; 57604963800; 57604708500; 58119742800; 55801795700; 57204140159; 57219940989	Transcriptome-wide assessment of N6-methyladenosine modification identifies different gene expression and infection-associated pathways in Treponema pallidum-infected macrophage	2023	Journal of Dermatological Science	10.1016/j.jdermsci.2023.02.004	https://www.scopus.com/inward/record.uri?eid=2-s2.0-85149042888&doi=10.1016%2fj.jdermsci.2023.02.004&partnerID=40&md5=548a86dccbe6dead345c9e54f0850d79	Dermatology Hospital, Southern Medical University, Guangzhou, China; Lanzhou University Second Hospital, Lanzhou, China; The Second Clinical Medical College, Lanzhou University, Lanzhou, China	Background: Treponema pallidum (Tp) is a widespread and destructive pathogen that leads to syphilis. As the acknowledged executor of host immunity, macrophage plays vital roles in combating the invasion and migration of Tp. However, the mechanisms of these processes are largely unknown, especially the critical driver genes and associated modifications. Objective: We aimed to systematically dissec…	Infection-associated pathways; Macrophage; MeRIP-seq; N6-methyladenosine modification; RNA-seq; Treponema pallidum	Adenosine; Humans; Macrophages; Syphilis; Transcriptome; Treponema pallidum; 6 n methyladenosine; messenger RNA; transcriptome; adenosine; transcriptome; angiogenesis; Article; bioinformatics; catabolism; cell differentiation; controlled study; differential gene expression; gene expression; gene ontology; genetic modification; genetic transcription; in vitro study; infection; inflammation; macrop…	Hook E.W., Syphilis, Lancet, 389, 10078, pp. 1550-1557, (2017); Peeling R.W., Mabey D., Kamb M.L., Chen X.S., Radolf J.D., Benzaken A.S., Syphilis, Nat. Rev. Dis. Prim., 3, (2017); Peeling R.W., Hook E.W., The pathogenesis of syphilis: the great mimicker, revisited, J. Pathol., 208, 2, pp. 224-232, (2006); Radolf J.D., Deka R.K., Anand A., Smajs D., Norgard M.V., Yang X.F., Treponema pallidum, th…	B. Yang; Dermatology Hospital, Southern Medical University, Guangzhou, China; email: yangbin1@smu.edu.cn	Elsevier Ireland Ltd	9231811	JDSCE	36841722	English	J. Dermatol. Sci.	Article		Scopus	2-s2.0-85149042888
Wang Y.; Huang J.; Jin H.	Wang, Yanan (58700609500); Huang, Jiuzuo (56329264200); Jin, Hongzhong (35388536000)	58700609500; 56329264200; 35388536000	Reduction of Methyltransferase-like 3-Mediated RNA N6-Methyladenosine Exacerbates the Development of Psoriasis Vulgaris in Imiquimod-Induced Psoriasis-like Mouse Model	2022	International Journal of Molecular Sciences	10.3390/ijms232012672	https://www.scopus.com/inward/record.uri?eid=2-s2.0-85140809397&doi=10.3390%2fijms232012672&partnerID=40&md5=609b5bb9531d32cb35de2cdb0428eefc	Department of Dermatology, State Key Laboratory of Complex Severe and Rare Diseases, Peking Union Medical College Hospital, Chinese Academy of Medical Science and Peking Union Medical College, National Clinical Research Center for Dermatologic and Immunologic Diseases, Beijing, 100730, China; Department of Plastic Surgery, Peking Union Medical College Hospital, Chinese Academy of Medical Science …	N6-methyladenosine (m6A) methylation is the most pervasive and intensively studied mRNA modification, which regulates gene expression in different physiological processes, such as cell proliferation, differentiation, and inflammation. Studies of aberrant m6A in human diseases such as cancer, obesity, infertility, neuronal disorders, immune diseases, and inflammation are rapidly evolving. However,…	m<sup>6</sup>A methylation; METTL3; N6-methyladenosine; psoriasis; psoriasis vulgaris; RNA modification	Adenosine; Animals; Disease Models, Animal; Humans; Imiquimod; Inflammation; Methyltransferases; Mice; Psoriasis; RNA; RNA, Messenger; 6 n methyladenosine; imiquimod; methyltransferase; RNA; adenosine; imiquimod; messenger RNA; methyltransferase; METTL3 protein, human; RNA; animal cell; animal experiment; animal model; animal tissue; Article; clinical article; controlled study; dermatitis; diseas…	Greb J.E., Goldminz A.M., Elder J.T., Lebwohl M.G., Gladman D.D., Wu J.J., Mehta N.N., Finlay A.Y., Gottlieb A.B., Psoriasis, Nat. Rev. Dis. Prim, 2, (2016); Boehncke W.H., Schon M.P., Psoriasis, Lancet, 386, pp. 983-994, (2015); Hugh J.M., Weinberg J.M., Update on the pathophysiology of psoriasis, Cutis, 102, pp. 6-12, (2018); Becher B., Pantelyushin S., Hiding under the skin: Interleukin-17-pro…	H. Jin; Department of Dermatology, State Key Laboratory of Complex Severe and Rare Diseases, Peking Union Medical College Hospital, Chinese Academy of Medical Science and Peking Union Medical College, National Clinical Research Center for Dermatologic and Immunologic Diseases, Beijing, 100730, China; email: jinhongzhong@pumch.cn	MDPI	16616596		36293529	English	Int. J. Mol. Sci.	Article	All Open Access; Gold Open Access; Green Open Access	Scopus	2-s2.0-85140809397
Zhang K.; Li P.; Jia Y.; Liu M.; Jiang J.	Zhang, Kexin (57723322100); Li, Pei (57220072813); Jia, Yuanyuan (57220071930); Liu, Ming (57214854301); Jiang, Jingjing (57188830766)	57723322100; 57220072813; 57220071930; 57214854301; 57188830766	Non-coding RNA and n6-methyladenosine modification play crucial roles in neuropathic pain	2022	Frontiers in Molecular Neuroscience	10.3389/fnmol.2022.1002018	https://www.scopus.com/inward/record.uri?eid=2-s2.0-85143297685&doi=10.3389%2ffnmol.2022.1002018&partnerID=40&md5=23ce387e1c4e24d5f2fc245d25c54461	Department of Anesthesiology, Shengjing Hospital of China Medical University, Shenyang, China	After peripheral nerve injury, pain signals are transmitted from primary sensory neurons in the dorsal root ganglion (DRG) to the central nervous system. Epigenetic modification affects neuropathic pain through alterations in the gene expression in pain-related areas and glial cell activation. Recent studies have shown that non-coding RNA and n6-methyladenosine (m6A) methylation modification play…	glial cell; n6-methyladenosine (m6A); neuroinflammation; neuropathic pain; non-coding RNAs (ncRNAs)	6 n methyladenosine; chemokine receptor CXCR4; circular ribonucleic acid; cryopyrin; DNA methyltransferase 3A; interleukin 18; interleukin 1beta; interleukin 1beta converting enzyme; long untranslated RNA; microRNA; microRNA 124 3p; microRNA 136; microRNA 137; microRNA 146a 5p; microRNA 150; microRNA 151a 3p; microRNA 23a; microRNA 24 3p; microRNA 26a 5p; microRNA 30c 5p; microRNA 324 3p; microRN…	Alarcon C.R., Lee H., Goodarzi H., Halberg N., Tavazoie S.F., N6-methyladenosine marks primary micrornas for processing, Nature, 519, pp. 482-485, (2015); Albik S., Tao Y.X., Emerging role of RNA m6A modification in chronic pain, Pain, 162, pp. 1897-1898, (2021); Baron R., Neuropathic pain: A clinical perspective, Handb. Exp. Pharmacol, 194, pp. 3-30, (2009); Bokar J.A., Shambaugh M.E., Polayes D…	J. Jiang; Department of Anesthesiology, Shengjing Hospital of China Medical University, Shenyang, China; email: jjj_sj@163.com	Frontiers Media S.A.	16625099			English	Front. Mol. Neurosci.	Review	All Open Access; Gold Open Access; Green Open Access	Scopus	2-s2.0-85143297685
Jabs S.; Biton A.; Bécavin C.; Nahori M.-A.; Ghozlane A.; Pagliuso A.; Spanò G.; Guérineau V.; Touboul D.; Giai Gianetto Q.; Chaze T.; Matondo M.; Dillies M.-A.; Cossart P.	Jabs, Sabrina (13009163200); Biton, Anne (56042740100); Bécavin, Christophe (36096447000); Nahori, Marie-Anne (6601938945); Ghozlane, Amine (55433961500); Pagliuso, Alessandro (55014482000); Spanò, Giulia (57215723570); Guérineau, Vincent (12242729900); Touboul, David (8921239300); Giai Gianetto, Quentin (57193551481); Chaze, Thibault (13205741600); Matondo, Mariette (8701936100); Dillies, Marie-…	13009163200; 56042740100; 36096447000; 6601938945; 55433961500; 55014482000; 57215723570; 12242729900; 8921239300; 57193551481; 13205741600; 8701936100; 12771098900; 7103021053	Impact of the gut microbiota on the m6A epitranscriptome of mouse cecum and liver	2020	Nature Communications	10.1038/s41467-020-15126-x	https://www.scopus.com/inward/record.uri?eid=2-s2.0-85081714493&doi=10.1038%2fs41467-020-15126-x&partnerID=40&md5=fb51162195d1e48844232cf5d3d71fc2	Unité des Interactions Bactéries-Cellules, Institut Pasteur, U604 Institut National de la Santé et de la Recherche Médicale, USC 2020 Institut National de la Recherche Agronomique, 25 rue du Dr Roux, Paris, F-75015, France; Hub de Bioinformatique et Biostatistique – Département Biologie Computationnelle, Institut Pasteur, USR 3756 CNRS, 28 rue du Dr Roux, Paris, F-75015, France; Institut de Chimi…	The intestinal microbiota modulates host physiology and gene expression via mechanisms that are not fully understood. Here we examine whether host epitranscriptomic marks are affected by the gut microbiota. We use methylated RNA-immunoprecipitation and sequencing (MeRIP-seq) to identify N6-methyladenosine (m6A) modifications in mRNA of mice carrying conventional, modified, or no microbiota. We fi…		Adenosine; Animals; Bacteria; Cecum; Female; Gastrointestinal Microbiome; Liver; Methylation; Methyltransferases; Mice; Mice, Inbred C57BL; RNA, Messenger; Transcriptome; Akkermansia muciniphila; Lactobacillus plantarum; Mus; 6 n methyladenosine; amphotericin B; messenger RNA; methyltransferase; RNA; RNA 16S; s adenosylmethionine; synthetase; vancomycin; adenosine; messenger RNA; methyltransferas…	Dominissini D., Et al., Topology of the human and mouse m6A RNA methylomes revealed by m6A-seq, Nature, 485, pp. 201-206, (2012); Meyer K.D., Et al., Comprehensive Analysis of mRNA Methylation Reveals Enrichment in 3′ UTRs and near Stop Codons, Cell, 149, pp. 1635-1646, (2012); Peer E., Rechavi G., Dominissini D., Epitranscriptomics: regulation of mRNA metabolism through modifications, Curr. Opin…	S. Jabs; Unité des Interactions Bactéries-Cellules, Institut Pasteur, U604 Institut National de la Santé et de la Recherche Médicale, USC 2020 Institut National de la Recherche Agronomique, Paris, 25 rue du Dr Roux, F-75015, France; email: sabrina.jabs@pasteur.fr	Nature Research	20411723		32165618	English	Nat. Commun.	Article	All Open Access; Gold Open Access	Scopus	2-s2.0-85081714493
He Y.; Wang W.; Xu X.; Yang B.; Yu X.; Wu Y.; Wang J.	He, Ying (57211552529); Wang, Wei (58843590100); Xu, Xiaoxiao (57211609675); Yang, Beining (57194134853); Yu, Xijie (57201899558); Wu, Yanru (55966562400); Wang, Jiawei (55966740300)	57211552529; 58843590100; 57211609675; 57194134853; 57201899558; 55966562400; 55966740300	Mettl3 inhibits the apoptosis and autophagy of chondrocytes in inflammation through mediating Bcl2 stability via Ythdf1-mediated m6A modification	2022	Bone	10.1016/j.bone.2021.116182	https://www.scopus.com/inward/record.uri?eid=2-s2.0-85115084230&doi=10.1016%2fj.bone.2021.116182&partnerID=40&md5=615201cdff166d929451a263eb34fbe2	The State Key Laboratory Breeding Base of Basic Science of Stomatology (Hubei-MOST) & Key Laboratory of Oral Biomedicine Ministry of Education, School & Hospital of Stomatology, Wuhan University, Wuhan, 430079, Hubei, China; Departments of Pancreatic Surgery, Renmin Hospital of Wuhan University, Wuhan, 430060, Hubei Province, China	N6-methyladenosine (m6A) methylation is one of the most common internal modifications in eukaryotic messenger RNA occurring on N6 nitrogen of adenosine. However, the roles of m6A in temporomandibular joint osteoarthritis (TMJ OA) are still elusive. Here, we investigate the function and mechanism of methyltransferase-like 3 (Mettl3) in chondrocytes in inflammation. We found that the expression of …	Apoptosis; Autophagy; B-cell lymphoma 2; Chondrocyte; Inflammation; Methyltransferase-like 3; N<sup>6</sup>-methyladenosine	Animals; Apoptosis; Autophagy; Chondrocytes; Inflammation; Methyltransferases; Mice; 6 n methyladenosine; beclin 1; membrane protein; methyltransferase like 3 protein; protein bcl 2; s adenosylhomocysteine; tumor necrosis factor; unclassified drug; methyltransferase; Mettl3 protein, mouse; animal cell; animal experiment; animal model; animal tissue; antiapoptotic activity; Article; autophagy (cel…	de Souza R.F., Lovato da Silva C.H., Nasser M., Fedorowicz Z., Al-Muharraqi M.A., Interventions for the management of temporomandibular joint osteoarthritis, Cochrane Database Syst. Rev., 4, (2012); Wang X.D., Kou X.X., He D.Q., Zeng M.M., Meng Z., Bi R.Y., Liu Y., Zhang J.N., Gan Y.H., Zhou Y.H., Progression of cartilage degradation, bone resorption and pain in rat temporomandibular joint osteoa…	J. Wang; The State Key Laboratory Breeding Base of Basic Science of Stomatology (Hubei-MOST) & Key Laboratory of Oral Biomedicine Ministry of Education, School & Hospital of Stomatology, Wuhan University, Wuhan, 430079, China; email: wb000238@whu.edu.cn	Elsevier Inc.	87563282	BONED	34530171	English	Bone	Article		Scopus	2-s2.0-85115084230
Liu E.; Lv L.; Zhan Y.; Ma Y.; Feng J.; He Y.; Wen Y.; Zhang Y.; Pu Q.; Ji F.; Yang X.; Wen J.G.	Liu, Erpeng (57219399698); Lv, Lei (57224824906); Zhan, Yonghao (56911701300); Ma, Yuan (57212312078); Feng, Jinjin (57197877724); He, Yulin (57212307726); Wen, Yibo (56706785000); Zhang, Yanping (57193363349); Pu, Qingsong (57212307433); Ji, Fengping (57212303653); Yang, Xinghuan (57219403145); Wen, Jian Guo (12758536100)	57219399698; 57224824906; 56911701300; 57212312078; 57197877724; 57212307726; 56706785000; 57193363349; 57212307433; 57212303653; 57219403145; 12758536100	METTL3/N6-methyladenosine/ miR-21-5p promotes obstructive renal fibrosis by regulating inflammation through SPRY1/ERK/NF-κB pathway activation	2021	Journal of Cellular and Molecular Medicine	10.1111/jcmm.16603	https://www.scopus.com/inward/record.uri?eid=2-s2.0-85108311705&doi=10.1111%2fjcmm.16603&partnerID=40&md5=3b1c080d39f243abaf42745d0dbd2461	Department of Urology, First Affiliated Hospital of Zhengzhou University, Zhengzhou, China; Urodynamics Center, First Affiliated Hospital of Zhengzhou University, Zhengzhou, China; Henan Joint International Pediatric Urodynamic Laboratory, Zhengzhou University, Zhengzhou, China	Renal fibrosis induced by urinary tract obstruction is a common clinical occurrence; however, effective treatment is lacking, and a deeper understanding of the mechanism of renal fibrosis is needed. Previous studies have revealed that miR-21 impacts liver and lung fibrosis progression by activating the SPRY1/ERK/NF-kB signalling pathway. However, whether miR-21 mediates obstructive renal fibrosis…	METTL3; miR-21-5p; N6-methyladenosine (m<sup>6</sup>A); renal fibrosis; Spry1/ERK/NF-κB; urinary tract obstruction	Adaptor Proteins, Signal Transducing; Adenosine; Animals; Cell Line; Disease Models, Animal; Female; Fibrosis; Humans; Inflammation; Kidney Diseases; Membrane Proteins; Methyltransferases; Mice; Mice, Inbred C57BL; MicroRNAs; Mitogen-Activated Protein Kinase 3; NF-kappa B; Signal Transduction; Ureteral Obstruction; 6 n methyladenosine; collagen; METTL3 N6 methyladenosine; microRNA 21; unclassifie…	Liu L., Wang Y., Yan R., Et al., BMP-7 inhibits renal fibrosis in diabetic nephropathy via miR-21 downregulation, Life Sci, 238, (2019); Lyu H., Li X., Wu Q., Hao L., Overexpression of microRNA-21 mediates Ang II-induced renal fibrosis by activating the TGF-beta1/Smad3 pathway via suppressing PPARalpha, J Pharmacol Sci, 141, pp. 70-78, (2019); Tang C.R., Luo S.G., Lin X., Et al., Silenced miR-21 …	J.G. Wen; Department of Urology, First Affiliated Hospital of Zhengzhou University, Zhengzhou, China; email: wenjianguo2020@126.com	John Wiley and Sons Inc	15821838		34164910	English	J. Cell. Mol. Med.	Article	All Open Access; Gold Open Access; Green Open Access	Scopus	2-s2.0-85108311705
He S.; Li W.; Wang G.; Wang X.; Fan W.; Zhang Z.; Li N.; Hou S.	He, Siyuan (57535926800); Li, Wanqian (57538390800); Wang, Guoqing (57745211500); Wang, Xiaotang (57536741700); Fan, Wei (57538799600); Zhang, Zhi (58032121600); Li, Na (57307977300); Hou, Shengping (16646157700)	57535926800; 57538390800; 57745211500; 57536741700; 57538799600; 58032121600; 57307977300; 16646157700	FTO-mediated m6A modification alleviates autoimmune uveitis by regulating microglia phenotypes via the GPC4/TLR4/NF-κB signaling axis	2023	Genes and Diseases	10.1016/j.gendis.2022.09.008	https://www.scopus.com/inward/record.uri?eid=2-s2.0-85146994516&doi=10.1016%2fj.gendis.2022.09.008&partnerID=40&md5=947861914f22ba687bea2594dba0af4e	The First Affiliated Hospital of Chongqing Medical University, Chongqing, 400016, China; Chongqing Key Laboratory of Ophthalmology, Chongqing, 400016, China; Chongqing Eye Institute, Chongqing, 400016, China; Chongqing Branch of National Clinical Research Center for Ocular Diseases, Chongqing, 400016, China; College of Basic Medicine, Chongqing Medical University, Chongqing, 400016, China	Uveitis, a vision-threatening inflammatory disease worldwide, is closely related to resident microglia. Retinal microglia are the main immune effector cells with strong plasticity, but their role in uveitis remains unclear. N6-methyladenosine (m6A) modification has been proven to be involved in the immune response. Therefore, we in this work aimed to identify the potentially crucial m6A regulator…	Fat mass and obesity-associated protein; Glypican 4; Microglia; N6-methyladenosine; Uveitis; YTH domain Family protein 3	6 n methyladenosine; alpha ketoglutarate dependent dioxygenase FTO; CD4 antigen; glypican; glypican 4; resatorvid; short hairpin RNA; toll like receptor 4; tumor necrosis factor; unclassified drug; animal cell; animal experiment; animal model; Article; autoimmune uveitis; CD4+ T lymphocyte; cell proliferation assay; chemotaxis; coculture; comparative study; controlled study; density gradient cent…	Chong W.P., Mattapallil M.J., Raychaudhuri K., Et al., The cytokine IL-17A limits Th17 pathogenicity via a negative feedback loop driven by autocrine induction of IL-24, Immunity, 53, 2, pp. 384-397, (2020); Wang C., Tian Y., Lei B., Et al., Decreased IL-27 expression in association with an increased Th17 response in Vogt-Koyanagi-Harada disease, Invest Ophthalmol Vis Sci, 53, 8, pp. 4668-4675, (…	S. Hou; The First Affiliated Hospital of Chongqing Medical University, Chongqing, 400016, China; email: sphou828@163.com; N. Li; College of Basic Medicine, Chongqing Medical University, Chongqong, 400016, China; email: 102600@cqmu.edu.cn	KeAi Communications Co.	23524820			English	Genes Dis.	Article	All Open Access; Gold Open Access; Green Open Access	Scopus	2-s2.0-85146994516
Wang Z.; Qi Y.; Feng Y.; Xu H.; Wang J.; Zhang L.; Zhang J.; Hou X.; Feng G.; Shang W.	Wang, Zhigang (55971513700); Qi, Yuanbo (57192910976); Feng, Yonghua (55969933300); Xu, Hongen (55446697900); Wang, Junxiang (57204809871); Zhang, Luyu (57246305800); Zhang, Jie (58396905900); Hou, Xinyue (57224732143); Feng, Guiwen (7401642075); Shang, Wenjun (36148507600)	55971513700; 57192910976; 55969933300; 55446697900; 57204809871; 57246305800; 58396905900; 57224732143; 7401642075; 36148507600	The N6-methyladenosine writer WTAP contributes to the induction of immune tolerance post kidney transplantation by targeting regulatory T cells	2022	Laboratory Investigation	10.1038/s41374-022-00811-w	https://www.scopus.com/inward/record.uri?eid=2-s2.0-85134592366&doi=10.1038%2fs41374-022-00811-w&partnerID=40&md5=737759ba92582adf54c889fe3abbe2f7	Department of Kidney Transplantation, The First Affiliated Hospital of Zhengzhou University, Zhengzhou, 450000, China; Precision Medicine Center of Zhengzhou University, Academy of Medical Sciences, Zhengzhou University, Zhengzhou, China	N6-methyladenosine (m6A) modification is involved in diverse immunoregulation, while the relationship between m6A modification and immune tolerance post kidney transplantation remains unclear. Expression of Wilms tumor 1-associating protein (WTAP), an m6A writer, was firstly detected in tolerant kidney transplant recipients (TOL). Then the role of WTAP on regulatory T (Treg) cell differentiation …		Adenosine; Animals; Immune Tolerance; Kidney Transplantation; Mice; RNA, Messenger; T-Lymphocytes, Regulatory; WT1 Proteins; 6 n methyladenosine; immunosuppressive agent; messenger RNA; transcription factor FKHR; tumor suppressor protein; unclassified drug; Wilms tumor 1 associated protein; adenosine; messenger RNA; WT1 protein; animal cell; animal experiment; animal model; animal tissue; Article…	Zhang R., Donor-specific antibodies in kidney transplant recipients, Clin J Am Soc Nephrol, 13, pp. 182-192, (2018); Shrestha B.M., Two decades of tacrolimus in renal transplant: Basic science and clinical evidences, Exp Clin Transpl, 15, pp. 1-9, (2017); Yu P., Xiong S., He Q., Chu Y., Lu C., Ramlogan C., Et al., Induction of allogeneic mixed chimerism by immature dendritic cells and bone marrow…	Z. Wang; Department of Kidney Transplantation, The First Affiliated Hospital of Zhengzhou University, Zhengzhou, 450000, China; email: zhigang2012@126.com; G. Feng; Department of Kidney Transplantation, The First Affiliated Hospital of Zhengzhou University, Zhengzhou, 450000, China; email: fengguiwen@zzu.com.cn; W. Shang; Department of Kidney Transplantation, The First Affiliated Hospital of Zhen…	Springer Nature	236837	LAINA	35864150	English	Lab. Investig.	Article	All Open Access; Bronze Open Access	Scopus	2-s2.0-85134592366
Ogawa A.; Nagiri C.; Shihoya W.; Inoue A.; Kawakami K.; Hiratsuka S.; Aoki J.; Ito Y.; Suzuki T.; Suzuki T.; Inoue T.; Nureki O.; Tanihara H.; Tomizawa K.; Wei F.-Y.	Ogawa, Akiko (57190187296); Nagiri, Chisae (57210640145); Shihoya, Wataru (57191250540); Inoue, Asuka (8358533700); Kawakami, Kouki (57193540607); Hiratsuka, Suzune (57220194911); Aoki, Junken (7101990457); Ito, Yasuhiro (55467350100); Suzuki, Takeo (16140396600); Suzuki, Tsutomu (35241411100); Inoue, Toshihiro (36131533200); Nureki, Osamu (7005656771); Tanihara, Hidenobu (57191567766); Tomizawa,…	57190187296; 57210640145; 57191250540; 8358533700; 57193540607; 57220194911; 7101990457; 55467350100; 16140396600; 35241411100; 36131533200; 7005656771; 57191567766; 7005111912; 7202453167	N6-methyladenosine (m6A) is an endogenous A3 adenosine receptor ligand	2021	Molecular Cell	10.1016/j.molcel.2020.12.038	https://www.scopus.com/inward/record.uri?eid=2-s2.0-85100638859&doi=10.1016%2fj.molcel.2020.12.038&partnerID=40&md5=cc3285316b7644a22b95a69aeceef30b	Department of Modomics Biology and Medicine, Institute of Development, Aging and Cancer (IDAC), Tohoku University, Sendai, 980-8575, Japan; Department of Molecular Physiology, Faculty of Life Sciences, Kumamoto University, Kumamoto, Japan; Department of Ophthalmology, Faculty of Life Sciences, Kumamoto University, Kumamoto, Japan; Department of Biological Sciences, Graduate School of Science, Uni…	About 150 post-transcriptional RNA modifications have been identified in all kingdoms of life. During RNA catabolism, most modified nucleosides are resistant to degradation and are released into the extracellular space. In this study, we explored the physiological role of these extracellular modified nucleosides and found that N6-methyladenosine (m6A), widely recognized as an epigenetic mark in R…	adenosine; adenosine A3 receptor; extracellular modified nucleosides; N6-methyladenosine; RNA catabolism; RNA modification; signaling molecule	Adenosine; Animals; Epigenesis, Genetic; Female; HEK293 Cells; Humans; Male; Rabbits; Receptor, Adenosine A3; RNA Processing, Post-Transcriptional; Signal Transduction; 1,4 diamino 1,4 bis(2 aminophenylthio) 2,3 dicyanobutadiene; 1,4 dihydro 2 methyl 6 phenyl 4 (2 phenylethynyl) 3,5 pyridinedicarboxylic acid 5 benzyl 3 ethyl ester; 6 n methyladenosine; adenosine; adenosine A3 receptor; beta arres…	Aizawa S., Fujiwara Y., Contu V.R., Hase K., Takahashi M., Kikuchi H., Kabuta C., Wada K., Kabuta T., Lysosomal putative RNA transporter SIDT2 mediates direct uptake of RNA by lysosomes, Autophagy, 12, pp. 565-578, (2016); Angelova M.T., Dimitrova D.G., Da Silva B., Marchand V., Jacquier C., Achour C., Brazane M., Goyenvalle C., Bourguignon-Igel V., Shehzada S., Et al., tRNA 2′-O-methylation by a…	F.-Y. Wei; Department of Modomics Biology and Medicine, Institute of Development, Aging and Cancer (IDAC), Tohoku University, Sendai, 980-8575, Japan; email: fanyan.wei.d3@tohoku.ac.jp	Cell Press	10972765	MOCEF	33472058	English	Mol. Cell	Article	All Open Access; Green Open Access	Scopus	2-s2.0-85100638859
Li T.; Zhu Y.; Lin C.; Chen J.; Yin Y.; Tang X.; Chen Y.; Guo A.; Hu C.	Li, Ting (57218178213); Zhu, Yifan (57214794742); Lin, Changjie (57217280969); Chen, Jie (58372233600); Yin, Yiya (57222261659); Tang, Xin (57211578862); Chen, Yingyu (36072083100); Guo, Aizhen (57203317771); Hu, Changmin (7404569910)	57218178213; 57214794742; 57217280969; 58372233600; 57222261659; 57211578862; 36072083100; 57203317771; 7404569910	N6-Methyladenosine Modification Profile in Bovine Mammary Epithelial Cells Treated with Heat-Inactivated Staphylococcus aureus	2022	Oxidative Medicine and Cellular Longevity	10.1155/2022/1704172	https://www.scopus.com/inward/record.uri?eid=2-s2.0-85125780307&doi=10.1155%2f2022%2f1704172&partnerID=40&md5=2fab5e647050cff2dd9ce870f0fcf8ed	Department of Clinical Veterinary Medicine, Faculty of Veterinary Medicine, Huazhong Agricultural University, Hubei Province, Wuhan, 430070, China; Department of Preventive Veterinary Medicine, Faculty of Veterinary Medicine, Huazhong Agricultural University, Hubei Province, Wuhan, 430070, China; State Key Laboratory of Agricultural Microbiology, Huazhong Agricultural University, Hubei Province, …	The symptoms of mastitis caused by Staphylococcus aureus (S. aureus) in dairy cows are not obvious and difficult to identify, resulting in major economic losses. N6-Methyladenosine (m6A) modification has been reported to be closely associated with the occurrence of many diseases. However, only a few reports have described the role of m6A modification in S. aureus-induced mastitis. In this study, …		Analysis; Bacteria; Cells; Diseases; Genes; Losses; Mammals; Metabolism; Adenosine; Animals; Cattle; Cell Line, Transformed; Cytokines; Epithelial Cells; Female; Hot Temperature; Mammary Glands, Animal; Mastitis; Methylation; Microbial Viability; Reactive Oxygen Species; RNA; RNA Processing, Post-Transcriptional; RNA, Messenger; Signal Transduction; Staphylococcal Infections; Staphylococcus aureu…	Ashraf A., Imran M., Causes, types, etiological agents, prevalence, diagnosis, treatment, prevention, effects on human health and future aspects of bovine mastitis, Animal Health Research Reviews, 21, 1, pp. 36-49, (2020); Chu H., Mazmanian S.K., Innate immune recognition of the microbiota promotes host-microbial symbiosis, Nature Immunology, 14, 7, pp. 668-675, (2013); Wu Y., Sun Y., Dong X., Ch…	C. Hu; Department of Clinical Veterinary Medicine, Faculty of Veterinary Medicine, Huazhong Agricultural University, Wuhan, Hubei Province, 430070, China; email: hcm@mail.hzau.edu.cn	Hindawi Limited	19420900		35251466	English	Oxidative Med. Cell. Longevity	Article	All Open Access; Gold Open Access; Green Open Access	Scopus	2-s2.0-85125780307
Xu L.; Zhou L.; Yan C.; Li L.	Xu, Limin (57204889626); Zhou, Lingyan (57949928000); Yan, Chenxin (57949890000); Li, Liqin (57194699823)	57204889626; 57949928000; 57949890000; 57194699823	Emerging role of N6-methyladenosine RNA methylation in lung diseases	2022	Experimental Biology and Medicine	10.1177/15353702221128564	https://www.scopus.com/inward/record.uri?eid=2-s2.0-85141012995&doi=10.1177%2f15353702221128564&partnerID=40&md5=7efacf0f617200f6b028946390350042	Huzhou Central Hospital, Affiliated Hospital of Huzhou Normal University, Huzhou, 313000, China; Huzhou Hospital, Zhejiang University, Huzhou, 313000, China; Shulan International Medical College, Zhejiang Shuren University, Hangzhou, 310015, China	In recent years, with the increase of air pollution, smoking, aging, and respiratory infection, the incidence rate and mortality of lung diseases are increasing annually, which has become a major hazard to human health. N6-methyladenosine (m6A) RNA methylation is the most abundant modifications in eukaryotes, and such modified RNA can be specifically recognized and combined by m6A recognition pro…	asthma; chronic obstructive pulmonary disease; idiopathic pulmonary fibrosis; lung cancer; N6-methyladenosine	Adenosine; Asthma; Humans; Lung Diseases; Lung Neoplasms; Methylation; RNA; RNA, Messenger; 6 n methyladenosine; cryptochrome; DNA methyltransferase 3A; forkhead box protein M1; long untranslated RNA; microRNA; somatomedin binding protein 1; somatomedin binding protein 2; transcription factor Yap1; adenosine; messenger RNA; RNA; acute myeloid leukemia; apoptosis; asthma; carcinogenesis; carcinoge…	Perlman D.M., Maier L.A., Occupational lung disease, Med Clin North Am, 103, (2019); Khateeb J., Fuchs E., Khamaisi M., Diabetes and lung disease: a neglected relationship, Rev Diabet Stud, 15, pp. 1-15, (2019); Raghu G., Collard H.R., Egan J.J., Martinez F.J., Behr J., Brown K.K., Colby T.V., Cordier J.F., Flaherty K.R., Lasky J.A., Lynch D.A., Ryu J.H., Swigris J.J., Wells A.U., Ancochea J., Bo…	L. Li; Huzhou Central Hospital, Affiliated Hospital of Huzhou Normal University, Huzhou, 313000, China; email: liliqin@hzhospital.com	SAGE Publications Inc.	15353702	EBMMB	36278325	English	Exp. Biol. Med.	Review	All Open Access; Green Open Access	Scopus	2-s2.0-85141012995
Zhang C.; Fu J.; Zhou Y.	Zhang, Caiyan (57190974312); Fu, Jinrong (57197821769); Zhou, Yufeng (36182116200)	57190974312; 57197821769; 36182116200	A review in research progress concerning m6A methylation and immunoregulation	2019	Frontiers in Immunology	10.3389/fimmu.2019.00922	https://www.scopus.com/inward/record.uri?eid=2-s2.0-85066060632&doi=10.3389%2ffimmu.2019.00922&partnerID=40&md5=749e2fd37850a9bd63bf6115a03944b2	Children's Hospital and Institutes of Biomedical Sciences, Fudan University, Shanghai, China; NHC Key Laboratory of Neonatal Diseases, Fudan University, Shanghai, China	Over 100 types of cellular RNA modifications have been identified in both coding and a variety of non-coding RNAs. N6-methyladenosine (m6A) is the most prevalent and abundant post-transcriptional RNA modification on eukaryote mRNA, and its biological functions are mediated by special binding proteins (i.e., methyltransferases, demethylases, and effectors) that recognize this modification. The pre…	Binding proteins; Cellular functions; Immunoregulation; Mechanisms; N6-methyladenosine	Active Transport, Cell Nucleus; Adenosine; Humans; Methylation; Methyltransferases; Neoplasms; RNA Processing, Post-Transcriptional; RNA Splicing; RNA, Messenger; 6 n methyladenosine; interleukin 6; interleukin 7; interleukin 8; melanoma growth stimulatory activity factor; methyltransferase; RANTES; untranslated RNA; adenosine; messenger RNA; N(6)-methyladenosine; adaptive immunity; apoptosis; bi…	Desrosiers R., Friderici K., Rottman F., Identification of methylated nucleosides in messenger RNA from novikoff hepatoma cells, Proc Nat Acad Sci USA, 71, pp. 3971-3975, (1974); Wei W., Ji X., Guo X., Ji S., Regulatory role of N(6) -methyladenosine (m(6) A) methylation in RNA processing and human diseases, J Cel Biochem., 118, pp. 2534-2543, (2017); Wei C.M., Gershowitz A., Moss B., Methylated n…	Y. Zhou; Children's Hospital and Institutes of Biomedical Sciences, Fudan University, Shanghai, China; email: yfzhou1@fudan.edu.cn	Frontiers Media S.A.	16643224		31080453	English	Front. Immunol.	Review	All Open Access; Gold Open Access; Green Open Access	Scopus	2-s2.0-85066060632
Jian D.; Wang Y.; Jian L.; Tang H.; Rao L.; Chen K.; Jia Z.; Zhang W.; Liu Y.; Chen X.; Shen X.; Gao C.; Wang S.; Li M.	Jian, Dongdong (57188704865); Wang, Ying (57211357566); Jian, Liguo (56740161400); Tang, Hao (56927251600); Rao, Lixin (57189055118); Chen, Ke (55683588700); Jia, Zhen (59037825700); Zhang, Wanjun (57204445018); Liu, Yiran (57218593715); Chen, Xu (57218592897); Shen, Xiwen (57208868034); Gao, Chuanyu (7402617699); Wang, Shuai (56379183800); Li, Muwei (32167581300)	57188704865; 57211357566; 56740161400; 56927251600; 57189055118; 55683588700; 59037825700; 57204445018; 57218593715; 57218592897; 57208868034; 7402617699; 56379183800; 32167581300	METTL14 aggravates endothelial inflammation and atherosclerosis by increasing FOXO1 N6-methyladeosine modifications	2020	Theranostics	10.7150/thno.45178	https://www.scopus.com/inward/record.uri?eid=2-s2.0-85089708645&doi=10.7150%2fthno.45178&partnerID=40&md5=bc86216dab233f40f3aa7ff7281b5c41	Department of Cardiology, Henan Provincial People's Hospital, Department of Cardiology of Central China Fuwai Hospital, Henan Key Laboratory for Coronary Heart Disease Prevention and Control, Central China Fuwai Hospital of Zhengzhou University, Zhengzhou, Henan, 450003, China; Department of Cardiology, Second Affiliated Hospital, Zhengzhou University, Zhengzhou, Henan, 450003, China; Heart Cente…	Aims: The N6-methyladenosine (m6A) modification plays an important role in various biological processes, but its role in atherosclerosis remains unknown. The aim of this study was to investigate the role and mechanism of m6A modification in endothelial cell inflammation and its influence on atherosclerosis development. Methods: We constructed a stable TNF-α-induced endothelial cell inflammation m…	Atherosclerosis; Endothelial inflammation; FOXO1; M<sup>6</sup>A modification; METTL14	Adenosine; Animals; Atherosclerosis; Cells, Cultured; Endothelial Cells; Forkhead Box Protein O1; HEK293 Cells; Human Umbilical Vein Endothelial Cells; Humans; Inflammation; Methyltransferases; Mice; Mice, Inbred C57BL; Mice, Knockout; Promoter Regions, Genetic; RNA, Messenger; THP-1 Cells; Transcription, Genetic; 6 n methyladenosine; messenger RNA; methyltransferase; methyltransferase like 14; t…	Gimbrone MA, Garcia-Cardena G., Endothelial Cell Dysfunction and the Pathobiology of Atherosclerosis, Circ Res, 118, 4, pp. 620-636, (2016); Akhtar S, Hartmann P, Karshovska E, Rinderknecht FA, Subramanian P, Gremse F, Et al., Endothelial Hypoxia-Inducible Factor-1alpha Promotes Atherosclerosis and Monocyte Recruitment by Upregulating MicroRNA-19a, Hypertension, 66, 6, pp. 1220-1226, (2015); Gimb…	C. Gao; Department of Cardiology, Henan Provincial People's Hospital, Department of Cardiology of Central China Fuwai Hospital, Henan Key Laboratory for Coronary Heart Disease Prevention and Control, Central China Fuwai Hospital of Zhengzhou University, Zhengzhou, Henan, 450003, China; email: gaocy1102@163.com; M. Li; Department of Cardiology, Henan Provincial People's Hospital, Department of Car…	Ivyspring International Publisher	18387640		32802173	English	Theranostics	Article	All Open Access; Gold Open Access	Scopus	2-s2.0-85089708645
Wu C.; Chen W.; He J.; Jin S.; Liu Y.; Yi Y.; Gao Z.; Yang J.; Yang J.; Cui J.; Zhao W.	Wu, Chenglei (57192119735); Chen, Weixin (57212491458); He, Jincan (57214005281); Jin, Shouheng (57184706600); Liu, Yukun (57219333277); Yi, Yang (57203794085); Gao, Zhuoxing (57212027521); Yang, Jiayan (57212895937); Yang, Jianhua (35303990300); Cui, Jun (55233269400); Zhao, Wei (57226718746)	57192119735; 57212491458; 57214005281; 57184706600; 57219333277; 57203794085; 57212027521; 57212895937; 35303990300; 55233269400; 57226718746	Interplay of m6A and H3K27 trimethylation restrains inflammation during bacterial infection	2020	Science Advances	10.1126/sciadv.aba0647	https://www.scopus.com/inward/record.uri?eid=2-s2.0-85090182154&doi=10.1126%2fsciadv.aba0647&partnerID=40&md5=49d78da8e8e051e5f4683570b0b37f06	RNA Biomedical Institute, Sun Yat-sen Memorial Hospital, Sun Yat-sen University, Guangzhou, 510120, China; Key Laboratory of Stem Cells and Tissue Engineering, Zhongshan School of Medicine, Sun Yat-sen University, Ministry of Education, Guangzhou, 510080, China; MOE Key Laboratory of Gene Function and Regulation, State Key Laboratory of Biocontrol, School of Life Sciences, Sun Yat-sen University,…	While N6-methyladenosine (m6A) is the most prevalent modification of eukaryotic messenger RNA (mRNA) involved in various cellular responses, its role in modulating bacteria-induced inflammatory response remains elusive. Here, we showed that loss of the m6A reader YTH-domain family 2 (YTHDF2) promoted demethylation of histone H3 lysine-27 trimethylation (H3K27me3), which led to enhanced production…		Bacterial Infections; Cytokines; Histones; Humans; Inflammation; Jumonji Domain-Containing Histone Demethylases; Lysine; RNA, Messenger; Alkylation; Amino acids; RNA; cytokine; histone; histone demethylase; KDM6B protein, human; lysine; messenger RNA; Bacterial infections; Cellular response; Demethylation; Inflammatory response; Messenger RNAs (mRNA); Methyltransferases; Pro-inflammatory cytokine…	Medzhitov R., Origin and physiological roles of inflammation, Nature, 454, pp. 428-435, (2008); Kotas M. E., Medzhitov R., Homeostasis, inflammation, and disease susceptibility, Cell, 160, pp. 816-827, (2015); Takeuchi O., Akira S., Pattern recognition receptors and inflammation, Cell, 140, pp. 805-820, (2010); Barrat F. J., Elkon K. B., Fitzgerald K. A., Importance of nucleic acid recognition in…	W. Zhao; RNA Biomedical Institute, Sun Yat-sen Memorial Hospital, Sun Yat-sen University, Guangzhou, 510120, China; email: zhaowei23@mail.sysu.edu.cn; J. Yang; RNA Biomedical Institute, Sun Yat-sen Memorial Hospital, Sun Yat-sen University, Guangzhou, 510120, China; email: yangjh7@mail.sysu.edu.cn; J. Cui; RNA Biomedical Institute, Sun Yat-sen Memorial Hospital, Sun Yat-sen University, Guangzhou,…	American Association for the Advancement of Science	23752548		32875102	English	Sci. Adv.	Article	All Open Access; Gold Open Access; Green Open Access	Scopus	2-s2.0-85090182154
Wang L.; Fan Y.-F.; Li B.-R.; Sun W.-H.; Wang L.-N.	Wang, Lin (57463621700); Fan, Yi-fu (57959806900); Li, Bing-rui (57959590100); Sun, Wen-hui (57959364400); Wang, Li-na (57193330916)	57463621700; 57959806900; 57959590100; 57959364400; 57193330916	Maslinic Acid Suppresses High Glucose-induced Inflammation by Epigenetically Inhibiting TXNIP Expression	2022	Current Medical Science	10.1007/s11596-022-2657-6	https://www.scopus.com/inward/record.uri?eid=2-s2.0-85141598081&doi=10.1007%2fs11596-022-2657-6&partnerID=40&md5=11f16244215741bfe6f1ef4bf072d224	Department of Traditional Chinese Medicine, Naval Medical University, Shanghai, 200433, China; School of Basic Medicine, Naval Medical University, Shanghai, 200433, China	Objective: Hyperglycemia-induced inflammation and subsequent endothelial injuries ultimately lead to the pathogenesis of cardiovascular diseases associated with high mortality, such as atherosclerosis. Maslinic acid (MA) is a phytochemical with anti-inflammatory activity. However, it remains unknown whether it can inhibit diabetes-associated cardiovascular inflammation. The present study aimed to…	inflammation; maslinic acid; N<sup>6</sup>-methyladenosine; RNA demethylase ALKBH5	Atherosclerosis; Carrier Proteins; Cytokines; Glucose; Human Umbilical Vein Endothelial Cells; Humans; Inflammation; RNA, Messenger; carrier protein; cytokine; glucose; maslinic acid; messenger RNA; TXNIP protein, human; atherosclerosis; genetics; human; inflammation; metabolism; umbilical vein endothelial cell	Global, regional, and national incidence, prevalence, and years lived with disability for 328 diseases and injuries for 195 countries, 1990–2016: a systematic analysis for the Global Burden of Disease Study 2016, Lancet, 390, pp. 1211-1259, (2017); Kharroubi A.T., Darwish H.M., Diabetes mellitus: The epidemic of the century, World J Diabetes, 6, 6, pp. 850-867, (2015); Taleb S., Inflammation in a…	L. Wang; Department of Traditional Chinese Medicine, Naval Medical University, Shanghai, 200433, China; email: wanglin1210@163.com; L.-N. Wang; Department of Traditional Chinese Medicine, Naval Medical University, Shanghai, 200433, China; email: rena1022@163.com	Huazhong University of Science and Technology	20965230		36350490	English	Curr. Med. Sci.	Article		Scopus	2-s2.0-85141598081
Liu Y.; Liu Z.; Tang H.; Shen Y.; Gong Z.; Xie N.; Zhang X.; Wang W.; Kong W.; Zhou Y.; Fu Y.	Liu, Yihan (57211121883); Liu, Zhujiang (57202822625); Tang, Hao (56927251600); Shen, Yicong (57205539573); Gong, Ze (57198804005); Xie, Nan (56681789700); Zhang, Xu (56282204100); Wang, Wengong (25226032400); Kong, Wei (57203966592); Zhou, Yuan (57728287200); Fu, Yi (55712879800)	57211121883; 57202822625; 56927251600; 57205539573; 57198804005; 56681789700; 56282204100; 25226032400; 57203966592; 57728287200; 55712879800	The N6-methyladenosine (m6A)-forming enzyme METTL3 facilitates M1 macrophage polarization through the methylation of STAT1 mRNA	2019	American Journal of Physiology - Cell Physiology	10.1152/ajpcell.00212.2019	https://www.scopus.com/inward/record.uri?eid=2-s2.0-85072717448&doi=10.1152%2fajpcell.00212.2019&partnerID=40&md5=63159abf46d1d8672e3e1c9bb9572a15	Department of Physiology and Pathophysiology, School of Basic Medical Sciences, Peking University, Beijing, 100191, China; Key Laboratory of Molecular Cardiovascular Science, Ministry of Education, Beijing, China; Department of Biochemistry and Molecular Biology, School of Basic Medical Sciences, Peking University, Beijing, China; Department of Biomedical Informatics, School of Basic Medical Scie…	Compelling evidence indicates that epigenetic regulations orchestrate dynamic macrophage polarization. N6-methyladenosine (m6A) methylation is the most abundant epigenetic modification of mammalian mRNA, but its role in macrophage polarization is still completely unknown. Here, we show that the m6A-catalytic enzyme methyltransferase like 3 (METTL3) is specifically upregulated following the M1 pol…	M6A methylation; Macrophage polarization; METTL3	Adenosine; Animals; Anti-Inflammatory Agents; Gene Expression Regulation; Macrophage Activation; Macrophages; Male; Methylation; Methyltransferases; Mice, Inbred C57BL; RNA, Messenger; STAT1 Transcription Factor; 6 n methyladenosine; m6 A catalytic enzyme methyltransferase like 3; messenger RNA; methyltransferase; reactive oxygen metabolite; STAT1 protein; unclassified drug; adenosine; antiinflam…	Arguello A.E., DeLiberto A.N., Kleiner R.E., RNA chemical proteomics reveals the N6-methyladenosine (m6A)-regulated protein-RNA interactome, J Am Chem Soc, 139, pp. 17249-17252, (2017); Berlivet S., Scutenaire J., Deragon J.M., Bousquet-Antonelli C., Readers of the m6A epitranscriptomic code, Biochim Biophys Acta Gene Regul Mech, 1862, pp. 329-342, (2019); Calvillo L., Gironacci M.M., Crotti L., …	Y. Fu; Department of Physiology and Pathophysiology, School of Basic Medical Sciences, Peking University, Beijing, 100191, China; email: yi.fu@bjmu.edu.cn	American Physiological Society	3636143	AJPCD	31365297	English	Am. J. Physiol. Cell Physiol.	Article	All Open Access; Bronze Open Access	Scopus	2-s2.0-85072717448
Zhang C.; Dai D.; Zhang W.; Yang W.; Guo Y.; Wei Q.	Zhang, Cheng (56901982100); Dai, Dongjun (59271399400); Zhang, Wangjian (57216303139); Yang, Wenjun (57206586753); Guo, Yinglu (57204003180); Wei, Qichun (55138080600)	56901982100; 59271399400; 57216303139; 57206586753; 57204003180; 55138080600	Role of m6A RNA methylation in the development of hepatitis B virus-associated hepatocellular carcinoma	2022	Journal of Gastroenterology and Hepatology (Australia)	10.1111/jgh.15999	https://www.scopus.com/inward/record.uri?eid=2-s2.0-85138255019&doi=10.1111%2fjgh.15999&partnerID=40&md5=ed19054fca2c5af1baf966ef4bb4c843	Department of Medical Oncology, The Affiliated Hospital of Hangzhou Normal University, Zhejiang, Hangzhou, China; Department of Radiation Oncology, The Second Affiliated Hospital, Zhejiang University School of Medicine, Zhejiang, Hangzhou, China; Key Laboratory of Cancer Prevention and Intervention, China National Ministry of Education, Zhejiang University School of Medicine, Zhejiang, Hangzhou, …	Hepatocellular carcinoma (HCC) is the most common liver malignancy that can be developed from hepatitis B and cirrhosis. Many pathophysiological alterations, including hepatitis B virus (HBV) DNA integration, oxidative stress, cytokine release, telomerase homeostasis, mitochondrial damage, epigenetic modification, and tumor microenvironment, are involved in the biological process from hepatitis B…	clinical implication; hepatitis B virus; hepatocellular carcinoma; m6A; RNA methylation	Carcinoma, Hepatocellular; Hepatitis B; Hepatitis B virus; Humans; Liver Cirrhosis; Liver Neoplasms; Methylation; RNA; Tumor Microenvironment; 6 n methyladenosine; RNA; angiogenesis; apoptosis; autophagy (cellular); biological functions; cell differentiation; cell migration; cell proliferation; hepatitis B; Hepatitis B virus; human; inflammation; liver carcinogenesis; liver cell carcinoma; nonhum…	Sung H., Ferlay J., Siegel R.L., Et al., Global cancer statistics 2020: GLOBOCAN estimates of incidence and mortality worldwide for 36 cancers in 185 countries, CA Cancer J. Clin., 71, pp. 209-249, (2021); Siegel R.L., Miller K.D., Fuchs H.E., Jemal A., Cancer statistics, 2021, CA Cancer J. Clin., 71, pp. 7-33, (2021); McGlynn K.A., Petrick J.L., El-Serag H.B., Epidemiology of hepatocellular carc…	Q. Wei; Department of Radiation Oncology, The Second Affiliated Hospital, Zhejiang University School of Medicine, Hangzhou, Zhejiang, China; email: qichun_wei@zju.edu.cn	John Wiley and Sons Inc	8159319	JGHEE	36066844	English	J. Gastroenterol. Hepatol.	Review	All Open Access; Hybrid Gold Open Access	Scopus	2-s2.0-85138255019
Lu Z.; Liu H.; Song N.; Liang Y.; Zhu J.; Chen J.; Ning Y.; Hu J.; Fang Y.; Teng J.; Zou J.; Dai Y.; Ding X.	Lu, Zhihui (57202249145); Liu, Hong (57220786802); Song, Nana (57188843452); Liang, Yiran (57193797882); Zhu, Jiaming (56136111700); Chen, Jing (58852388600); Ning, Yichun (55233794900); Hu, Jiachang (57020145900); Fang, Yi (10244244600); Teng, Jie (57220593483); Zou, Jianzhou (7401552102); Dai, Yan (56883552600); Ding, Xiaoqiang (25947382100)	57202249145; 57220786802; 57188843452; 57193797882; 56136111700; 58852388600; 55233794900; 57020145900; 10244244600; 57220593483; 7401552102; 56883552600; 25947382100	METTL14 aggravates podocyte injury and glomerulopathy progression through N6-methyladenosine-dependent downregulating of Sirt1	2021	Cell Death and Disease	10.1038/s41419-021-04156-y	https://www.scopus.com/inward/record.uri?eid=2-s2.0-85115810662&doi=10.1038%2fs41419-021-04156-y&partnerID=40&md5=c7ab8d1438c973f6549550f3a97ceecb	Division of Nephrology, Zhongshan Hospital, Fudan University, Shanghai, China; Shanghai Medical Center of Kidney, Shanghai, China; Shanghai Institute of Kidney and Dialysis, Shanghai, China; Shanghai Key Laboratory of Kidney and Blood Purification, Shanghai, China; Hemodialysis Quality Control Center of Shanghai, Shanghai, China	Podocytes are known to play a determining role in the progression of proteinuric kidney disease. N6-methyladenosine (m6A), as the most abundant chemical modification in eukaryotic mRNA, has been reported to participate in various pathological processes. However, its role in podocyte injury remains unclear. In this study, we observed the elevated m6A RNA levels and the most upregulated METTL14 exp…		Adenosine; Animals; Apoptosis; Autophagy; Cytoprotection; Diabetic Nephropathies; Disease Progression; Down-Regulation; Doxorubicin; Gene Silencing; Glycation End Products, Advanced; Inflammation; Male; Methyltransferases; Mice, Inbred C57BL; Models, Biological; Podocytes; RNA, Messenger; Sirtuin 1; Up-Regulation; 6 n methyladenosine; advanced glycation end product; creatinine; doxorubicin; inter…	Wiggins R.C., The spectrum of podocytopathies: a unifying view of glomerular diseases, Kidney Int, 71, pp. 1205-1214, (2007); Barisoni L., Mundel P., Podocyte biology and the emerging understanding of podocyte diseases, Am J Nephrol, 23, pp. 353-360, (2003); Shankland S.J., The podocyte’s response to injury: role in proteinuria and glomerulosclerosis, Kidney Int, 69, pp. 2131-2147, (2006); Mathie…	Y. Dai; Division of Nephrology, Zhongshan Hospital, Fudan University, Shanghai, China; email: dai.yan1@zs-hospital.sh.cn; X. Ding; Division of Nephrology, Zhongshan Hospital, Fudan University, Shanghai, China; email: dingxiaoqiang1965@126.com	Springer Nature	20414889		34580283	English	Cell Death Dis.	Article	All Open Access; Gold Open Access	Scopus	2-s2.0-85115810662
Feng Z.; Li Q.; Meng R.; Yi B.; Xu Q.	Feng, Zhihui (57200044453); Li, Qimeng (55644715500); Meng, Runsha (57200045855); Yi, Baicheng (58382081400); Xu, Qiong (36239393500)	57200044453; 55644715500; 57200045855; 58382081400; 36239393500	METTL3 regulates alternative splicing of MyD88 upon the lipopolysaccharide-induced inflammatory response in human dental pulp cells	2018	Journal of Cellular and Molecular Medicine	10.1111/jcmm.13491	https://www.scopus.com/inward/record.uri?eid=2-s2.0-85043297129&doi=10.1111%2fjcmm.13491&partnerID=40&md5=e1ec3a49d33ce5cb3b765e22e1a8a20b	Guanghua School of Stomatology, Guangdong Provincial Key Laboratory of Stomatology, Sun Yat-sen University, Guangzhou, China	Dental pulp inflammation is a widespread public health problem caused by oral bacterial infections and can progress to pulp necrosis and periapical diseases. N6-methyladenosine (m6A) is a prevalent epitranscriptomic modification in mRNA. Previous studies have demonstrated that m6A methylation plays important roles in cell differentiation, embryonic development and stress responses. However, wheth…	alternative splicing; dental pulp inflammation; lipopolysaccharide; METTL3; MyD88; N6-methyladenosine	Adenosine; Adolescent; Adult; Alternative Splicing; Cytokines; Dental Pulp; Down-Regulation; Humans; Inflammation; Inflammation Mediators; Lipopolysaccharides; MAP Kinase Signaling System; Methyltransferases; Myeloid Differentiation Factor 88; NF-kappa B; RNA, Messenger; Up-Regulation; Young Adult; 6 n methyladenosine; adenosine derivative; I kappa B kinase alpha; I kappa B kinase beta; immunoglo…	Adams J.M., Cory S., Modified nucleosides and bizarre 5’-termini in mouse myeloma mRNA, Nature, 255, pp. 28-33, (1975); Desrosiers R., Friderici K., Rottman F., Identification of methylated nucleosides in messenger RNA from novikoff hepatoma cells, Proc Natl Acad Sci U S A, 71, pp. 3971-3975, (1974); Furuichi Y., Morgan M., Shatkin A.J., Et al., Methylated, blocked 5 termini in HeLa cell mRNA, Pr…	Q. Xu; Guanghua School of Stomatology, Guangdong Provincial Key Laboratory of Stomatology, Sun Yat-sen University, Guangzhou, China; email: xqiong@mail.sysu.edu.cn	Blackwell Publishing Inc.	15821838		29502358	English	J. Cell. Mol. Med.	Article	All Open Access; Gold Open Access; Green Open Access	Scopus	2-s2.0-85043297129
Leseva M.N.; Buttari B.; Saso L.; Dimitrova P.A.	Leseva, Milena N. (57192940447); Buttari, Brigitta (8124810700); Saso, Luciano (7005488411); Dimitrova, Petya A. (6603093361)	57192940447; 8124810700; 7005488411; 6603093361	Infection Meets Inflammation: N6-Methyladenosine, an Internal Messenger RNA Modification as a Tool for Pharmacological Regulation of Host–Pathogen Interactions	2023	Biomolecules	10.3390/biom13071060	https://www.scopus.com/inward/record.uri?eid=2-s2.0-85165958347&doi=10.3390%2fbiom13071060&partnerID=40&md5=d317c209e001be7bb45b92afa8449e10	Laboratory of Experimental Immunotherapy, Department of Immunology, The Stephan Angeloff Institute of Microbiology, Bulgarian Academy of Sciences, Sofia, 1113, Bulgaria; Department of Cardiovascular and Endocrine-Metabolic Diseases and Aging, Istituto Superiore di Sanità, Rome, 00161, Italy; Department of Physiology and Pharmacology “Vittorio Erspamer”, La Sapienza University of Rome, Rome, 00185…	The significance of internal mRNA modifications for the modulation of transcript stability, for regulation of nuclear export and translation efficiency, and their role in suppressing innate immunity is well documented. Over the years, the molecular complexes involved in the dynamic regulation of the most prevalent modifications have been characterized—we have a growing understanding of how each m…	epitranscriptome; host–pathogen interactions; immune cells; infectious disease; m6A; N6-methyladenosine; viral infection	Animals; Host-Pathogen Interactions; Inflammation; Neoplasms; RNA; RNA, Messenger; 6 n methyladenosine; messenger RNA; methyltransferase; small interfering RNA; transcription factor Sox2; tumor necrosis factor receptor associated factor 2; messenger RNA; RNA; alternative RNA splicing; antiinflammatory activity; antiviral activity; cell infiltration; cell proliferation; cytokine production; cytoto…	Perry R.P., Kelley D.E., Friderici K., Rottman F., The methylated constituents of L cell messenger RNA: Evidence for an unusual cluster at the 5′ terminus, Cell, 4, pp. 387-394, (1975); Desrosiers R., Friderici K., Rottman F., Identification of methylated nucleosides in messenger RNA from Novikoff hepatoma cells, Proc. Natl. Acad. Sci. USA, 71, pp. 3971-3975, (1974); Furuichi Y., Methylation-coup…	M.N. Leseva; Laboratory of Experimental Immunotherapy, Department of Immunology, The Stephan Angeloff Institute of Microbiology, Bulgarian Academy of Sciences, Sofia, 1113, Bulgaria; email: mlesseva@microbio.bas.bg	Multidisciplinary Digital Publishing Institute (MDPI)	2218273X		37509095	English	Biomolecules	Review	All Open Access; Gold Open Access; Green Open Access	Scopus	2-s2.0-85165958347
Shen L.; Yu Y.; Jiang M.; Zhao J.	Shen, Liangliang (57226520647); Yu, Yue (57338267500); Jiang, Miao (56021990400); Zhao, Jingjun (57110957400)	57226520647; 57338267500; 56021990400; 57110957400	Alteration of the m6A methylation landscape in a mouse model of scleroderma	2021	Epigenomics	10.2217/epi-2021-0369	https://www.scopus.com/inward/record.uri?eid=2-s2.0-85120556902&doi=10.2217%2fepi-2021-0369&partnerID=40&md5=5871c62269fba29a674d60088aa73766	Department of Dermatology, Tongji Hospital, School of Medicine, Tongji University, Shanghai, 200065, China	Aim: To explore the N6-methyladenosine (m6A) methylation of mRNAs and its roles in a mouse model of scleroderma. Materials & methods: To evaluate whether the mouse model of scleroderma could meet the experimental requirements, we examined skin tissue specimens by pathological staining and identified the related indicators by quantitative PCR (qPCR). m6A-tagged mRNAs were identified via m6A epitra…	Bleomycin; Methylation; mRNA; N<sup>6</sup>-methyladenosine; Scleroderma	Adenosine; Animals; Autoimmune Diseases; Bleomycin; Connective Tissue Diseases; Disease Models, Animal; Female; Fibrosis; Gene Expression; Methylation; Mice, Inbred BALB C; RNA, Messenger; Skin; 6 n methyladenosine; interleukin 1beta; macrophage inflammatory protein 1alpha; messenger RNA; adenosine; bleomycin; messenger RNA; N-methyladenosine; animal experiment; animal model; animal tissue; Artic…	Denton C.P., Khanna D., Systemic sclerosis, Lancet, 390, pp. 1685-1699, (2017); Knobler R., Moinzadeh P., Hunzelmann N., Et al., European Dermatology Forum S1 guideline on the diagnosis and treatment of sclerosing diseases of the skin, part 1: Localized scleroderma, systemic sclerosis and overlap syndromes, J. Eur. Acad. Dermatol. Venereol., 31, 9, pp. 1401-1424, (2017); Gabrielli A., Avvedimento…	L. Shen; Department of Dermatology, Tongji Hospital, School of Medicine, Tongji University, Shanghai, 200065, China; email: shenliangliang8@126.com; M. Jiang; Department of Dermatology, Tongji Hospital, School of Medicine, Tongji University, Shanghai, 200065, China; email: jiangmiao2014@126.com; J. Zhao; Department of Dermatology, Tongji Hospital, School of Medicine, Tongji University, Shanghai, …	Future Medicine Ltd.	17501911		34791892	English	Epigenomics	Article	All Open Access; Hybrid Gold Open Access	Scopus	2-s2.0-85120556902
Xu Z.; Lv B.; Qin Y.; Zhang B.	Xu, Zujie (57222493422); Lv, Binbin (57418204900); Qin, Ying (57418593200); Zhang, Bing (56171182600)	57222493422; 57418204900; 57418593200; 56171182600	Emerging Roles and Mechanism of m6A Methylation in Cardiometabolic Diseases	2022	Cells	10.3390/cells11071101	https://www.scopus.com/inward/record.uri?eid=2-s2.0-85126991089&doi=10.3390%2fcells11071101&partnerID=40&md5=d7e3fd434f7d89344e7b548bc8affca8	Division of Sports Science and Physical Education, Tsinghua University, Beijing, 100084, China	Cardiometabolic diseases (CMDs) are currently the leading cause of death and dis-ability worldwide, and their underlying regulatory mechanisms remain largely unknown. N6-methyladenosine (m6A) methylation, the most common and abundant epigenetic modification of eukaryotic mRNA, is regulated by m6A methyltransferase, demethylase, and the m6A binding protein, which affect the transcription, cleavage…	Cardiometabolic diseases (CMDs); N6-Methyladenosine (m6A); RNA methylation	Adenosine; Cardiovascular Diseases; Humans; Methylation; Methyltransferases; RNA, Messenger; 6 n methyladenosine; long untranslated RNA; messenger RNA; microRNA; RNA 28S; small interfering RNA; toll like receptor 4; transfer RNA; adenosine; messenger RNA; methyltransferase; acute myeloid leukemia; adipogenesis; AMPK signaling; angiogenesis; apoptosis; Article; atherosclerosis; body mass; calcium …	Sattar N., Gill J.M.R., Alazawi W., Improving prevention strategies for cardiometabolic disease, Nat. Med, 26, pp. 320-325, (2020); Zhang W., Song M., Qu J., Liu G.H., Epigenetic Modifications in Cardiovascular Aging and Diseases, Circ. Res, 123, pp. 773-786, (2018); Zhao B.S., Roundtree I.A., He C., Post-transcriptional gene regulation by mRNA modifications, Nat. Rev. Mol. Cell Biol, 18, pp. 31-…	B. Zhang; Division of Sports Science and Physical Education, Tsinghua University, Beijing, 100084, China; email: bzhang@mail.tsinghua.edu.cn	MDPI	20734409		35406663	English	Cells	Article	All Open Access; Gold Open Access; Green Open Access	Scopus	2-s2.0-85126991089
Zhou B.; Luo Y.; Ji N.; Mao F.; Xiang L.; Bian H.; Zheng M.-H.; Hu C.; Li Y.; Lu Y.	Zhou, Bing (57217702142); Luo, Yunchen (57383097300); Ji, Nana (57868455300); Mao, Fei (57002577000); Xiang, Liping (57217702919); Bian, Hua (36993653000); Zheng, Ming-Hua (35235778200); Hu, Cheng (14121598300); Li, Yao (57038512600); Lu, Yan (57198798492)	57217702142; 57383097300; 57868455300; 57002577000; 57217702919; 36993653000; 35235778200; 14121598300; 57038512600; 57198798492	Promotion of nonalcoholic steatohepatitis by RNA N6-methyladenosine reader IGF2BP2 in mice	2022	Life Metabolism	10.1093/lifemeta/loac006	https://www.scopus.com/inward/record.uri?eid=2-s2.0-85136832309&doi=10.1093%2flifemeta%2floac006&partnerID=40&md5=ba82977b7a6e950371abf235a784d8e1	Shanghai Diabetes Institute, Shanghai Key Laboratory of Diabetes Mellitus, Shanghai Clinical Centre for Diabetes, Shanghai Jiao Tong University Affiliated Sixth People's Hospital, Shanghai, China; Key Laboratory of Metabolism and Molecular Medicine of the Ministry of Education, Department of Endocrinology and Metabolism, Zhongshan Hospital, Fudan University, Shanghai, China; Department of Endocri…	Nonalcoholic steatohepatitis (NASH) has emerged as the major cause of end-stage liver diseases. However, an incomplete understanding of its molecular mechanisms severely dampens the development of pharmacotherapies. In the present study, through systematic screening of genome-wide mRNA expression from three mouse models of hepatic inflammation and fibrosis, we identified IGF2BP2, an N6-methyladen…	hepatic inflammation; IGF2BP2; m6A reader; nonalcoholic steatohepatitis; TAB2		Younossi Z, Tacke F, Arrese M, Et al., Global perspectives on nonalcoholic fatty liver disease and nonalcoholic steatohepatitis, Hepatology, 69, pp. 2672-2682, (2019); Zhou J, Zhou F, Wang W, Et al., Epidemiological features of NAFLD from 1999 to 2018 in China, Hepatology, 71, pp. 1851-1864, (2020); Ferguson D, Finck BN., Emerging therapeutic approaches for the treatment of NAFLD and type 2 diabe…	Y. Lu; Key Laboratory of Metabolism and Molecular Medicine of the Ministry of Education, Department of Endocrinology and Metabolism, Zhongshan Hospital, Fudan University, Shanghai, China; email: lu.yan2@zs-hospital.sh.cn	Oxford University Press	20972555			English	Life. Metab.	Article	All Open Access; Gold Open Access	Scopus	2-s2.0-85136832309
Han J.; Kong H.; Wang X.; Zhang X.-A.	Han, Juanjuan (57459509600); Kong, Hui (57390928800); Wang, Xueqiang (49561922100); Zhang, Xin-an (36471478500)	57459509600; 57390928800; 49561922100; 36471478500	Novel insights into the interaction between N6-methyladenosine methylation and noncoding RNAs in musculoskeletal disorders	2022	Cell Proliferation	10.1111/cpr.13294	https://www.scopus.com/inward/record.uri?eid=2-s2.0-85132445625&doi=10.1111%2fcpr.13294&partnerID=40&md5=97597c3fd6f34cdd7fa0a0b1c90d5129	College of Kinesiology, Shenyang Sport University, Shenyang, China; Department of Sport Rehabilitation, Shanghai University of Sport, Shanghai, China; Department of Rehabilitation Medicine, Shanghai Shangti Orthopaedic Hospital, Shanghai, China	Background: Musculoskeletal disorder (MSD) are a class of inflammatory and degener-ative diseases, but the precise molecular mechanisms are still poorly understood. Noncoding RNA (ncRNA) N6-methyladenosine (m6A) modification plays an essential role in the pathophysiological process of MSD. This review summarized the interaction between m6A RNA methylation and ncRNAs in the molecular regulatory me…		Adenosine; Bone Neoplasms; Humans; Intervertebral Disc Degeneration; Methylation; MicroRNAs; Osteoarthritis; Osteoporosis; Osteosarcoma; RNA, Circular; RNA, Long Noncoding; RNA, Untranslated; 6 n methyladenosine; circular ribonucleic acid; ribosome RNA; small nuclear RNA; untranslated RNA; adenosine; long untranslated RNA; microRNA; N-methyladenosine; untranslated RNA; bone metabolism; cartilage;…	Adams J.M., Cory S., Modified nucleosides and bizarre 5'-termini in mouse myeloma mRNA, Nature, 255, 5503, pp. 28-33, (1975); Shi H., Wei J., He C., Where, when, and how: context-dependent functions of RNA methylation writers, readers, and erasers, Mol Cell, 74, 4, pp. 640-650, (2019); Clancy M.J., Shambaugh M.E., Timpte C.S., Et al., Induction of sporulation in Saccharomyces cerevisiae leads to …	X.-A. Zhang; College of Kinesiology, Shenyang Sport University, Shenyang, China; email: zhangxa2725@163.com; X. Wang; Department of Sport Rehabilitation, Shanghai University of Sport, Shanghai, China; email: qiang897@163.com	John Wiley and Sons Inc	9607722	CPROE	35735243	English	Cell Prolif.	Review	All Open Access; Green Open Access	Scopus	2-s2.0-85132445625
Teng Y.; Yi J.; Chen J.; Yang L.	Teng, Yan (56367181600); Yi, Jin (58728589200); Chen, Junnian (58727796200); Yang, Lu (55584760500)	56367181600; 58728589200; 58727796200; 55584760500	N6-Methyladenosine (m6A) Modification in Natural Immune Cell-Mediated Inflammatory Diseases	2023	Journal of Innate Immunity	10.1159/000534162	https://www.scopus.com/inward/record.uri?eid=2-s2.0-85178115741&doi=10.1159%2f000534162&partnerID=40&md5=439fe0203ba8a7bc6e0df160db81f736	Institute of Neurology, Sichuan Provincial People's Hospital, University of Electronic Science and Technology of China, Chengdu, China; School of Medicine, University of Electronic Science and Technology of China, Chengdu, China; Center for Informational Biology, School of Life Science and Technology, University of Electronic Science and Technology of China, Chengdu, China	The post-transcriptional N6-methyladenosine (m6A) modification of RNA influences stability, transport, and translation with implications for various physiological and pathological processes. Immune cell development, differentiation, and activation are also thought to be regulated by m6A and affect host defense against pathogens and inflammatory response with impacts on infectious, neoplastic, aut…	Inflammatory disease; Innate immune cell; m6A	Cell Differentiation; Killer Cells, Natural; Leukocytes; Neutrophils; 6 n methyladenosine; alpha ketoglutarate dependent dioxygenase FTO; C reactive protein; carrier proteins and binding proteins; circular ribonucleic acid; interleukin 6; mitogen activated protein kinase; somatomedin binding protein; STAT1 protein; toll like receptor 4; transforming growth factor beta1; tumor necrosis factor; unc…	Akar-Ghibril N., Defects of the innate immune system and related immune deficiencies, Clin Rev Allergy Immunol, 63, 1, pp. 36-54, (2022); Sherwood E.R., Burelbach K.R., McBride M.A., Stothers C.L., Owen A.M., Hernandez A., Et al., Innate immune memory and the host response to infection, J Immunol, 208, 4, pp. 785-792, (2022); Jiang X., Liu B., Nie Z., Duan L., Xiong Q., Jin Z., Et al., The role o…	L. Yang; Institute of Neurology, Sichuan Provincial People's Hospital, University of Electronic Science and Technology of China, Chengdu, China; email: lyang@uestc.edu.cn	S. Karger AG	1662811X		37903470	English	J. Innate Immun.	Review	All Open Access; Gold Open Access	Scopus	2-s2.0-85178115741
Ning J.; Yan J.; Yang H.	Ning, Jie (57224580431); Yan, Jie (57202810349); Yang, Huixia (51765020700)	57224580431; 57202810349; 51765020700	Exploring the role of m6A modification in the great obstetrical syndromes	2023	Journal of Maternal-Fetal and Neonatal Medicine	10.1080/14767058.2023.2234541	https://www.scopus.com/inward/record.uri?eid=2-s2.0-85165289145&doi=10.1080%2f14767058.2023.2234541&partnerID=40&md5=8fe90457fce9e3d6e4979a24a3743f7f	Department of Obstetrics and Gynecology, Peking University First Hospital, Beijing, China; Beijing Key Laboratory of Maternal Fetal Medicine of Gestational Diabetes Mellitus, Beijing, China; Peking University, Beijing, China	Background: N6-methyladenosine (m6A) is one of the predominant RNA epigenetic modifications that modify RNAs reversibly and dynamically by “writers” (methyltransferase), “erasers” (demethylase), and “readers.” Objective: This review aimed to provide a comprehensive understanding of the complexity of m6A regulation in the great obstetrical syndromes to understand its pathogenesis and potential the…	m6A; mRNA; N6-methyladenosine; placenta; trophoblast	Abortion, Spontaneous; Adenosine; Apoptosis; Female; Humans; Placenta; Pregnancy; Syndrome; 6 n methyladenosine; messenger RNA; adenosine; apoptosis; autophagy (cellular); cell invasion; cell migration; cell proliferation; cellular parameters; endoplasmic reticulum stress; epigenetic modification; fetus growth; gene expression; gestational diabetes; human; hyperglycemia in pregnancy; inflammation…	Zhao B.S., Roundtree I.A., He C., Post-transcriptional gene regulation by mRNA modifications, Nat Rev Mol Cell Biol, 18, 1, pp. 31-42, (2017); Gu Y., Chu X., Morgan J.A., Et al., Upregulation of METTL3 expression and m6A RNA methylation in placental trophoblasts in preeclampsia, Placenta, 103, pp. 43-49, (2021); Qiu W., Zhou Y., Wu H., Et al., RNA demethylase FTO mediated RNA mA modification is i…	H. Yang; Department of Obstetrics and Gynecology, Peking University First Hospital, Beijing, China; email: yanghuixia@bjmu.edu.cn	Taylor and Francis Ltd.	14767058	JMNMA	37474299	English	J. Matern.-Fetal Neonatal Med.	Review	All Open Access; Hybrid Gold Open Access	Scopus	2-s2.0-85165289145
Yu Z.; Zheng L.; Geng Y.; Zhang Y.; Wang Y.; You G.; Cai M.; Li M.; Cheng X.; Zan J.	Yu, Zhiyong (58082082600); Zheng, Linbo (57218712287); Geng, Yan (57942511300); Zhang, Yuting (57221947604); Wang, Yupeng (57216211254); You, Guoxing (58081735500); Cai, Mingsheng (39660948600); Li, Meili (36984157400); Cheng, Xiao (36967426700); Zan, Jie (55797921400)	58082082600; 57218712287; 57942511300; 57221947604; 57216211254; 58081735500; 39660948600; 36984157400; 36967426700; 55797921400	FTO alleviates cerebral ischemia/reperfusion-induced neuroinflammation by decreasing cGAS mRNA stability in an m6A-dependent manner	2023	Cellular Signalling	10.1016/j.cellsig.2023.110751	https://www.scopus.com/inward/record.uri?eid=2-s2.0-85162037133&doi=10.1016%2fj.cellsig.2023.110751&partnerID=40&md5=9dd80a4f41e5c64c61697bc8ed47da77	School of Biomedical and Pharmaceutical sciences, Guangdong University of Technology, Guangzhou, 510006, China; Department of Traditional Chinese Medicine, Guangdong Second Provincial General Hospital, Guangzhou, 510310, China; Department of Laboratory Medicine, The Sixth Affiliated Hospital of Guangzhou Medical University, Qingyuan People's Hospital, State Key Laboratory of Respiratory Disease, …	Microglia-mediated inflammation is a major contributor to the brain damage in cerebral ischemia and reperfusion (I/R) injury, and N6-Methyladenosine (m6A) has been implicated in cerebral I/R injury. Here, we explored whether m6A modification is associated with microglia-mediated inflammation in cerebral I/R injury and its underlying regulatory mechanism using an in vivo mice model of intraluminal…	Cerebral ischemia and reperfusion injury; Cyclic GMP-AMP synthase; Fat mass and obesity-associated protein; Inflammation; N6-Methyladenosine	Alpha-Ketoglutarate-Dependent Dioxygenase FTO; Animals; Brain Ischemia; Inflammation; Mice; Microglia; Neuroinflammatory Diseases; Reperfusion; Reperfusion Injury; Signal Transduction; 6 n methyladenosine; alpha ketoglutarate dependent dioxygenase FTO; messenger RNA; alpha ketoglutarate dependent dioxygenase FTO; FTO protein, mouse; animal experiment; animal model; animal tissue; Article; cerebra…	Zhu H., Hu S., Li Y., Sun Y., Xiong X., Hu X., Chen J., Qiu S., Interleukins and ischemic stroke, Front. Immunol., 13, (2022); Fisher M., Savitz S.I., Pharmacological brain cytoprotection in acute ischaemic stroke - renewed hope in the reperfusion era, Nat. Rev. Neurol., 18, pp. 193-202, (2022); Omorou M., Liu N., Huang Y., Al-Ward H., Gao M., Mu C., Zhang L., Hui X., Cystathionine beta-synthase …	M. Li; School of Biomedical and Pharmaceutical Sciences, Guangdong University of Technology, Guangzhou, 510006, China; email: limeili@gzhmu.edu.cn	Elsevier Inc.	8986568	CESIE	37321527	English	Cell. Signal.	Article		Scopus	2-s2.0-85162037133
Zhang X.; Cai X.	Zhang, Xinyu (58452710200); Cai, Xinsheng (57970790400)	58452710200; 57970790400	Potential impact of WTAP and YTHDF2 on tumor immunity in lung adenocarcinoma	2022	Medicine (United States)	10.1097/MD.0000000000031195	https://www.scopus.com/inward/record.uri?eid=2-s2.0-85142170088&doi=10.1097%2fMD.0000000000031195&partnerID=40&md5=2312d3af66539e33093deece2c97b315	Shandong University of Traditional Chinese Medicine, Jinan, China; Weifang Hospital of Traditional Chinese Medicine, Weifang, China	WTAP and N6-methyladenosine (m6A) reader proteins (YTHDF2) are N6-methyladenosine (m6A) methyltransferase and m6A reading proteins, respectively. In recent years, the tumor immune environment has received more and more attention in the progress and treatment of cancer. The aim of this study was to investigate the relationship between N6-methyladenosine (m6A) methyltransferase (WTAP)/YTHDF2 and th…	immune environment; lung adenocarcinoma; m6A; WTAP; YTHDF2	Adenocarcinoma of Lung; Adenosine; Cell Cycle Proteins; Humans; Methyltransferases; RNA Splicing Factors; RNA-Binding Proteins; Transcription Factors; 6 n methyladenosine; G protein coupled receptor; immune checkpoint inhibitor; methyltransferase; n6 methyladenosine methyltransferase; n6 methyladenosine reader protein; unclassified drug; adenosine; cell cycle protein; methyltransferase; RNA bindi…	Sung H., Ferlay J., Siegel R.L., Global Cancer Statistics 2020: GLOBOCAN estimates of incidence and mortality worldwide for 36 cancers in 185 countries, CA Cancer J Clin, 71, pp. 209-249, (2021); Ettinger D.S., Wood D.E., Aggarwal C., NCCN Guidelines insights: Non-small cell lung cancer, version 1.2020, J Natl Compr Canc Netw, 17, pp. 1464-1472, (2019); Miller K.D., Nogueira L., Mariotto A.B., Ca…	X. Cai; Weifang Hospital of Traditional Chinese Medicine, Jinan, 261000, China; email: relative2000@126.com	Lippincott Williams and Wilkins	257974	MEDIA	36397411	English	Medicine	Article	All Open Access; Gold Open Access; Green Open Access	Scopus	2-s2.0-85142170088
Cheng W.; Li M.; Zhang L.; Zhou C.; Yu S.; Peng X.; Zhang W.; Zhang W.	Cheng, Wenli (57641934900); Li, Min (57851367600); Zhang, Luyun (57226783278); Zhou, Cheng (57226766117); Yu, Susu (57217041513); Peng, Xinyue (57217041130); Zhang, Wenji (56703731300); Zhang, Wenjuan (37021959800)	57641934900; 57851367600; 57226783278; 57226766117; 57217041513; 57217041130; 56703731300; 37021959800	New roles of N6-methyladenosine methylation system regulating the occurrence of non-alcoholic fatty liver disease with N6-methyladenosine-modified MYC	2022	Frontiers in Pharmacology	10.3389/fphar.2022.973116	https://www.scopus.com/inward/record.uri?eid=2-s2.0-85138339183&doi=10.3389%2ffphar.2022.973116&partnerID=40&md5=95f6fa4a9128ecd3c687b1cf0d99dd66	Department of Public Health and Preventive Medicine, School of Medicine, Jinan University, Guangzhou, China; Guangdong Provincial Engineering and Technology Research Center for Tobacco Breeding and Comprehensive Utilization, Crops Research Institute, Guangdong Academy of Agricultural Science, Guangzhou, China	Non-alcoholic fatty liver disease (NAFLD) has become a major chronic disease in contemporary society, affected by N6-methyladenosine (m6A) RNA methylation, one of the most common RNA modifications. Compared with healthy control, m6A RNA methyltransferase 3 (METTL3) and METTL14 increased, while Wilms tumor 1-associated protein (WTAP) and RNA-binding motif protein 15 (RBM15) decreased significantly…	MYC; N6-methyladenosine (m6A); non-alcoholic fatty liver disease (NAFLD); non-alcoholic steatohepatitis (NASH); RNA methylation	6 n methyladenosine; 6 n methyladenosine RNA methyltransferase 14; 6 n methyladenosine RNA methyltransferase 3; alpha ketoglutarate dependent dioxygenase FTO; aminotransferase; eukaryotic translation initiation factor 3 subunit H; glucose; heterogeneous nuclear ribonucleoprotein; heterogeneous nuclear ribonucleoprotein A2B1; heterogeneous nuclear ribonucleoprotein group C; high density lipoprotei…	Agarwala S.D., Blitzblau H.G., Hochwagen A., Fink G.R., RNA methylation by the MIS complex regulates a cell fate decision in yeast, PLoS Genet, 8, 6, (2012); Alarcon C.R., Goodarzi H., Lee H., Liu X., Tavazoie S., Tavazoie S.F., HNRNPA2B1 is a mediator of m(6)a-dependent nuclear RNA processing events, Cell, 162, 6, pp. 1299-1308, (2015); Bawankar P., Lence T., Paolantoni C., Haussmann I.U., Kazla…	W. Zhang; Department of Public Health and Preventive Medicine, School of Medicine, Jinan University, Guangzhou, China; email: zwj2080@126.com; W. Zhang; Guangdong Provincial Engineering and Technology Research Center for Tobacco Breeding and Comprehensive Utilization, Crops Research Institute, Guangdong Academy of Agricultural Science, Guangzhou, China; email: zhangwenji@gdaas.cn	Frontiers Media S.A.	16639812			English	Front. Pharmacol.	Article	All Open Access; Gold Open Access	Scopus	2-s2.0-85138339183
Zhang R.; Zhang Y.; Guo F.; Li S.; Cui H.	Zhang, Runjiao (57204457888); Zhang, Yizhou (56743012100); Guo, Fangzhen (57576389100); Li, Sha (56151250300); Cui, Huixian (34767886300)	57204457888; 56743012100; 57576389100; 56151250300; 34767886300	RNA N6-Methyladenosine Modifications and Its Roles in Alzheimer’s Disease	2022	Frontiers in Cellular Neuroscience	10.3389/fncel.2022.820378	https://www.scopus.com/inward/record.uri?eid=2-s2.0-85128232820&doi=10.3389%2ffncel.2022.820378&partnerID=40&md5=3bbd1bbef1cc63353762f6fced719f09	Department of Anatomy, Hebei Medical University, Shijiazhuang, China; Neuroscience Research Center, Hebei Medical University, Shijiazhuang, China; Hebei Key Laboratory of Neurodegenerative Disease Mechanism, Shijiazhuang, China	The importance of epitranscriptomics in regulating gene expression has received widespread attention. Recently, RNA methylation modifications, particularly N6-methyladenosine (m6A), have received marked attention. m6A, the most common and abundant type of eukaryotic methylation modification in RNAs, is a dynamic reversible modification that regulates nuclear splicing, stability, translation, and …	Alzheimer’s disease; demethylase; memory disorder; methylation-binding protein; methyltransferase; N6-methyladenosine	6 n methyladenosine; AMPA receptor; antisense oligonucleotide; arsenic; epidermal growth factor receptor; fragile X mental retardation protein; histone deacetylase 2; histone deacetylase 3; mammalian target of rapamycin complex 1; methyltransferase; microRNA; myeloid differentiation factor 88; proline; RNA; RNA polymerase II; transcriptome; trichostatin A; ubiquitin protein ligase E3; 3' untransl…	Adhikari S., Xiao W., Zhao Y.L., Yang Y.G., m(6)A: signaling for mRNA splicing, RNA Biol, 13, pp. 756-759, (2016); Alarcon C.R., Goodarzi H., Lee H., Liu X., Tavazoie S., Tavazoie S.F., HNRNPA2B1 Is a Mediator of m(6)A-Dependent Nuclear RNA Processing Events, Cell, 162, pp. 1299-1308, (2015); Alzheimer A., Uber eine eigenartige Erkrankung der Hirnride, Allg. Z. Psychiatr, 64, pp. 146-148, (1907);…	S. Li; Department of Anatomy, Hebei Medical University, Shijiazhuang, China; email: lisha@hebmu.edu.cn; H. Cui; Department of Anatomy, Hebei Medical University, Shijiazhuang, China; email: cuihx@hebmu.edu.cn	Frontiers Media S.A.	16625102			English	Front. Cell. Neurosci.	Review	All Open Access; Gold Open Access; Green Open Access	Scopus	2-s2.0-85128232820
Yang F.; Zhang A.	Yang, Fan (59039542700); Zhang, Aihua (57114046200)	59039542700; 57114046200	Role of N6-methyladenosine RNA modification in the imbalanced inflammatory homeostasis of arsenic-induced skin lesions	2022	Environmental Toxicology	10.1002/tox.23530	https://www.scopus.com/inward/record.uri?eid=2-s2.0-85127415788&doi=10.1002%2ftox.23530&partnerID=40&md5=ef0c7b96954dbe0b9217a3a3a6ca9a83	The key Laboratory of Environmental Pollution Monitoring and Disease Control, Ministry of Education, Department of Toxicology, Guizhou Medical University, Guiyang, China	This study aimed to investigate the effect of N6-methyladenosine (m6A) modification in modulating inflammatory homeostasis of arsenic (As)-induced skin lesions. Our bioinformatic analysis revealed abnormal expression of m6A RNA methylation regulators and cytokines in the arsenic-exposed population. In human keratinocytes, arsenite increased the levels of m6A methylation by upregulating the RNA me…	arsenic; imbalanced inflammatory homeostasis; N<sup>6</sup>-methyladenosine; skin lesions	Adenosine; Arsenic; Arsenites; Cytokines; Homeostasis; Humans; Interleukin-10; Interleukin-17; Interleukin-6; Methyltransferases; RNA; Alkylation; Dermatology; Methylation; RNA; 6 n methyladenosine; arsenic; arsenic trioxide; cytokeratin 1; cytokeratin 10; interleukin 10; interleukin 17; interleukin 6; RNA methyltransferase; rna methyltransferase like 3; unclassified drug; adenosine; arsenous aci…	Otles S., Cagindi O., Health importance of arsenic in drinking water and food, Environ Geochem Health, 32, 4, pp. 367-371, (2010); Wang D., Luo P., Zou Z., Et al., Alterations of arsenic levels in arsenicosis residents and awareness of its risk factors: a population-based 20-year follow-up study in a unique coal-borne arsenicosis county in Guizhou, China Environ Int, 129, pp. 18-27, (2019); Alamo…	A. Zhang; The key Laboratory of Environmental Pollution Monitoring and Disease Control, Ministry of Education, Department of Toxicology, Guizhou Medical University, Guiyang, China; email: aihuagzykd@163.com	John Wiley and Sons Inc	15204081	ETOXF	35363433	English	Environ. Toxicol.	Article		Scopus	2-s2.0-85127415788
Liu K.; He X.; Huang J.; Yu S.; Cui M.; Gao M.; Liu L.; Qian Y.; Xie Y.; Hui M.; Hong Y.; Nie X.	Liu, Kailu (57222182780); He, Xi (57222189039); Huang, Jingyu (57222180817); Yu, Simin (57828721600); Cui, Meiting (57222181652); Gao, Mengya (58263148100); Liu, Li (58263498900); Qian, Yu (58263348700); Xie, Ying (58263248200); Hui, Miao (57827939800); Hong, Yanli (56648741400); Nie, Xiaowei (57817036300)	57222182780; 57222189039; 57222180817; 57828721600; 57222181652; 58263148100; 58263498900; 58263348700; 58263248200; 57827939800; 56648741400; 57817036300	Short-chain fatty acid-butyric acid ameliorates granulosa cells inflammation through regulating METTL3-mediated N6-methyladenosine modification of FOSL2 in polycystic ovarian syndrome	2023	Clinical Epigenetics	10.1186/s13148-023-01487-9	https://www.scopus.com/inward/record.uri?eid=2-s2.0-85159741009&doi=10.1186%2fs13148-023-01487-9&partnerID=40&md5=83ccab3e368c0d4c81f98ba41a3b19f3	Department of Reproductive Medicine, Jiangsu Province Hospital of Chinese Medicine, Affiliated Hospital of Nanjing University of Chinese Medicine, Nanjing, 210029, China; Department of Human Anatomy and Histoembryology, Nanjing University of Chinese Medicine, 210023, Nanjing, China	Polycystic ovary syndrome (PCOS) is an endocrine and metabolic disorder characterized by chronic low-grade inflammation. Previous studies have demonstrated that the gut microbiome can affect the host tissue cells’ mRNA N6-methyladenosine (m6A) modifications. This study aimed to understand the role of intestinal flora in ovarian cells inflammation by regulating mRNA m6A modification particularly t…	Butyric acid; Gut microbiome; Inflammation; m6A modification; PCOS	Animals; Butyric Acid; DNA Methylation; Fatty Acids, Volatile; Female; Fos-Related Antigen-2; Granulosa Cells; Humans; Inflammation; Methyltransferases; Mice; Obesity; Polycystic Ovary Syndrome; RNA, Messenger; RNA, Ribosomal, 16S; 6 n methyladenosine; butyric acid; cryopyrin; follitropin; glucose transporter 4; interleukin 6; luteinizing hormone; membrane protein; Muellerian inhibiting factor; p…	Azziz R., Et al., Polycystic ovary syndrome, Nat Rev Dis Primers, 2, (2016); Yu J., Et al., Characteristics and possible mechanisms of metabolic disorder in overweight women with polycystic ovary syndrome, Front Endocrinol (Lausanne), 13, (2023); Rostamtabar M., Et al., Pathophysiological roles of chronic low-grade inflammation mediators in polycystic ovary syndrome, J Cell Physiol, 236, pp. 824-…	Y. Hong; Department of Reproductive Medicine, Jiangsu Province Hospital of Chinese Medicine, Affiliated Hospital of Nanjing University of Chinese Medicine, Nanjing, 210029, China; email: 15951711586@126.com; X. Nie; Department of Reproductive Medicine, Jiangsu Province Hospital of Chinese Medicine, Affiliated Hospital of Nanjing University of Chinese Medicine, Nanjing, 210029, China; email: fsyy0…	BioMed Central Ltd	18687075		37179374	English	Clin. Epigenetics	Article	All Open Access; Gold Open Access; Green Open Access	Scopus	2-s2.0-85159741009
Hu Z.; Li Y.; Yuan W.; Jin L.; Leung W.K.; Zhang C.; Yang Y.	Hu, Zhekai (57222669469); Li, Yuqing (57900907500); Yuan, Weihao (57203146655); Jin, Lijian (7403328850); Leung, Wai Keung (57540305000); Zhang, Chengfei (7405494609); Yang, Yanqi (36623085300)	57222669469; 57900907500; 57203146655; 7403328850; 57540305000; 7405494609; 36623085300	N6-methyladenosine of Socs1 modulates macrophage inflammatory response in different stiffness environments	2022	International Journal of Biological Sciences	10.7150/ijbs.74196	https://www.scopus.com/inward/record.uri?eid=2-s2.0-85138553400&doi=10.7150%2fijbs.74196&partnerID=40&md5=33d0a2156c5b8f18259d8e739954663d	Division of Paediatric Dentistry and Orthodontics, Faculty of Dentistry, The University of Hong Kong, Hong Kong SAR, China; Division of Periodontology and Implant Dentistry, Faculty of Dentistry, The University of Hong Kong, Hong Kong SAR, China; School of Dentistry, University of California, Los Angeles, Los Angeles, 90095, CA, United States; Division of Restorative Dental Sciences, Faculty of D…	Macrophages exhibit diverse functions within various tissues during the inflammatory response, and the physical properties of tissues also modulate the characteristics of macrophages. However, the underlying N6-methyladenosine (m6A)-associated molecular mechanisms remain unclear. Accordingly, we examined the potential role of m6A in macrophage activation and stiffness sensing. Intriguingly, we fo…	FTO; Hydrogel stiffness; inflammatory response; m<sup>6</sup>A; SOCS1	Adenosine; Chromatin; Cytokines; Hydrogels; Macrophages; RNA, Messenger; Suppressor of Cytokine Signaling 1 Protein; Suppressor of Cytokine Signaling Proteins; adenosine; cytokine; messenger RNA; suppressor of cytokine signaling; suppressor of cytokine signaling 1; chromatin; genetics; hydrogel; macrophage; metabolism	Murray PJ, Wynn TA., Protective and pathogenic functions of macrophage subsets, Nat Rev Immunol, 11, pp. 723-737, (2011); Vining KH, Mooney DJ., Mechanical forces direct stem cell behaviour in development and regeneration, Nature reviews Molecular cell biology, 18, pp. 728-742, (2017); Handorf AM, Zhou Y, Halanski MA, Li W-J., Tissue stiffness dictates development, homeostasis, and disease progre…	Y. Yang; Division of Paediatric Dentistry and Orthodontics, Faculty of Dentistry, The University of Hong Kong, Hong Kong SAR, China; email: yangyanq@hku.hk	Ivyspring International Publisher	14492288		36263168	English	Int. J. Biol. Sci.	Article	All Open Access; Gold Open Access	Scopus	2-s2.0-85138553400
Liu W.; Zeng Y.; Huang L.; Zhang X.; Bi L.; Fan W.; Wu G.	Liu, WenQiang (58296857200); Zeng, Yue (57464705500); Huang, LiHan (57464705600); Zhang, XiaoZhe (57464827100); Bi, LianRu (58142441500); Fan, WenDong (55365729700); Wu, GuiFu (55483750000)	58296857200; 57464705500; 57464705600; 57464827100; 58142441500; 55365729700; 55483750000	RHOJ as a novel mechanosensitive modulator of endothelial inflammation	2023	Biochemical and Biophysical Research Communications	10.1016/j.bbrc.2023.05.099	https://www.scopus.com/inward/record.uri?eid=2-s2.0-85160683575&doi=10.1016%2fj.bbrc.2023.05.099&partnerID=40&md5=1e4f1346b0514978397f306de966c8aa	Department of Cardiology, The Eighth Affiliated Hospital of Sun Yat-sen University, Guangdong, Shenzhen, 518033, China; Department of Cardiology, The First Affiliated Hospital of Sun Yat-sen University, Guangdong, Guangzhou, 510080, China; NHC Key Laboratory of Assisted Circulation (Sun Yat-sen University), China; Guangdong Innovative Engineering and Technology Research Center for Assisted Circul…	Physiological high shear stress (HSS), a frictional force generated by flowing blood, is essential for endothelial homeostasis under normal physiological conditions. HSS suppresses atherosclerosis by inhibiting endothelial inflammation. However, the molecular mechanisms underlying this process have not been fully elucidated. Here, we report that HSS downregulated the mRNA and protein levels of ra…	Inflammation; N6-methyladenosine; Ras homolog family member J; Shear stress; Vascular endothelial cells	Atherosclerosis; Endothelial Cells; Humans; Inflammation; Methyltransferases; rho GTP-Binding Proteins; RNA; RNA, Messenger; RNA-Binding Proteins; 6 n methyladenosine; DNA methyltransferase 3A; heme oxygenase 1; immunoglobulin enhancer binding protein; intercellular adhesion molecule 1; monocyte chemotactic protein 1; ras homolog family member J protein; regulator protein; transcription factor Ya…	Cheng H., Zhong W., Wang L., Zhang Q., Ma X., Wang Y., Wang S., He C., Wei Q., Fu C., Effects of shear stress on vascular endothelial functions in atherosclerosis and potential therapeutic approaches, Biomed. Pharmacother., 158, (2023); Souilhol C., Serbanovic-Canic J., Fragiadaki M., Chico T.J., Ridger V., Roddie H., Evans P.C., Endothelial responses to shear stress in atherosclerosis: a novel r…	G. Wu; Department of Cardiology, the Eighth Affiliated Hospital of Sun Yat-sen University, Shenzhen, No. 3025 Shennan Zhong Road, Guangdong, 518033, China; email: wuguifu@mail.sysu.edu.cn; W. Fan; Department of Cardiology, the First Affiliated Hospital of Sun Yat-sen University, Guangzhou, No. 58 Zhongshan 2nd Road, Guangdong, 510080, China; email: fanwd3@mail.sysu.edu.cn	Elsevier B.V.	0006291X	BBRCA	37271038	English	Biochem. Biophys. Res. Commun.	Article		Scopus	2-s2.0-85160683575
Li K.; Zhang D.; Zhai S.; Wu H.; Liu H.	Li, Kun (55277501600); Zhang, Dongbin (57183264100); Zhai, Shuiting (16551290000); Wu, Huilin (58149703100); Liu, Hongzhi (57191739213)	55277501600; 57183264100; 16551290000; 58149703100; 57191739213	METTL3–METTL14 complex induces necroptosis and inflammation of vascular smooth muscle cells via promoting N6 methyladenosine mRNA methylation of receptor-interacting protein 3 in abdominal aortic aneurysms	2023	Journal of Cell Communication and Signaling	10.1007/s12079-023-00737-y	https://www.scopus.com/inward/record.uri?eid=2-s2.0-85150503414&doi=10.1007%2fs12079-023-00737-y&partnerID=40&md5=e15c5ec10955a8cb014ce051f4a9415d	Department of Vascular and Endovascular Surgery, Henan Provincial People’s Hospital, People’s Hospital of Zhengzhou University, Henan, Zhengzhou, 450003, China; Heart Center of Henan Provincial People’s Hospital, Central China Fuwai Hospital, Fuwai Hospital of Zhengzhou University, No. 1 Fuwai Road, Zhengdong New District, Henan, Zhengzhou, 451464, China	Abstract: Abdominal aortic aneurysms (AAA) have the highest incidence and rupture rate of all aortic aneurysms. The N6 methyladenosine (m6A) modification is closely associated with angiotensin (Ang II)-induced aortic diseases. This study aimed to identify whether the m6A writer METTL3/METTL4 regulates rip3 mRNA expression in AAA. To induce the mouse AAA model, apolipoprotein E-deficient (ApoE-/-)…	Abdominal aortic aneurysm; m6A modification; N6 methyladenosine; Necroptosis; RIP3	6 n methyladenosine; carrier proteins and binding proteins; CD68 antigen; elastase; elastin; receptor interacting protein 3; Smad2 protein; Smad3 protein; unclassified drug; abdominal aortic aneurysm; adventitia; animal cell; animal experiment; animal model; animal tissue; apolipoprotein E knockout mouse; Article; C57BL 6 mouse; coimmunoprecipitation; controlled study; gene; gene expression regul…	Baas A.F., Medic J., Association of the TGF-beta receptor genes with abdominal aortic aneurysm, Eur J Human Genet EJHG, 18, 2, pp. 240-244, (2010); Beretta G.L., Zaffaroni N., Necroptosis and prostate cancer: molecular mechanisms and therapeutic potential, Cells, 11, 7, (2022); Bertero A., Brown S., Madrigal P., Osnato A., Ortmann D., Yiangou L., Kadiwala J., Hubner N.C., de Los Mozos I.R., Sadee…	H. Liu; Heart Center of Henan Provincial People’s Hospital, Central China Fuwai Hospital, Fuwai Hospital of Zhengzhou University, Zhengzhou, No. 1 Fuwai Road, Zhengdong New District, Henan, 451464, China; email: hong_zhi_liu@126.com	Springer Science and Business Media B.V.	18739601			English	J. Cell Commun. Signal.	Article	All Open Access; Green Open Access	Scopus	2-s2.0-85150503414
Zhao B.; Wang W.; Zhao Y.; Qiao H.; Gao Z.; Chuai X.	Zhao, Baoxin (57201862380); Wang, Weijie (56727030000); Zhao, Yan (59048989800); Qiao, Hongxiu (57219449309); Gao, Zhiyun (24376315500); Chuai, Xia (24376253300)	57201862380; 56727030000; 59048989800; 57219449309; 24376315500; 24376253300	Regulation of Antiviral Immune Response by N6-Methyladenosine of mRNA	2021	Frontiers in Microbiology	10.3389/fmicb.2021.789605	https://www.scopus.com/inward/record.uri?eid=2-s2.0-85122035902&doi=10.3389%2ffmicb.2021.789605&partnerID=40&md5=5122078adb9e99ff37c7b5e0d8e92bc6	Department of Pathogen Biology, Hebei Medical University, Shijiazhuang, China; Institute of Medical and Health Science, Hebei Medical University, Shijiazhuang, China	Host innate and adaptive immune responses play a vital role in clearing infected viruses. Meanwhile, viruses also evolve a series of mechanisms to weaken the host immune responses and evade immune defense. Recently, N6-methyladenosine (m6A), the most prevalent mRNA modification, has been revealed to regulate multiple steps of RNA metabolism, such as mRNA splicing, localization, stabilization, and…	adaptive immunity; immune recognition; innate immunity; N<sup>6</sup>-methyladenosine modification; viral infection	6 n methyladenosine; messenger RNA; toll like receptor; adaptive immunity; antiviral activity; CD4+ T lymphocyte; cell activation; cell differentiation; cytokine production; dendritic cell; immune response; immunocompetent cell; innate immunity; lymphocyte differentiation; lymphocyte proliferation; macrophage; polarization; Review; RNA immunoprecipitation; RNA metabolism; RNA splicing; T lymphocy…	Alisjahbana A., Mohammad I., Gao Y., Evren E., Ringqvist E., Willinger T., Human macrophages and innate lymphoid cells: tissue-resident innate immunity in humanized mice, Biochem. Pharmacol, 174, (2020); Anderson E.J., Rouphael N.G., Widge A.T., Jackson L.A., Roberts P.C., Makhene M., Et al., Safety and immunogenicity of SARS-CoV-2 mRNA-1273 vaccine in older adults, N. Engl. J. Med, 383, pp. 2427…	X. Chuai; Department of Pathogen Biology, Hebei Medical University, Shijiazhuang, China; email: chuaixiahb@126.com	Frontiers Media S.A.	1664302X			English	Front. Microbiol.	Review	All Open Access; Gold Open Access	Scopus	2-s2.0-85122035902
Mapperley C.; van de Lagemaat L.N.; Lawson H.; Tavosanis A.; Paris J.; Campos J.; Wotherspoon D.; Durko J.; Sarapuu A.; Choe J.; Ivanova I.; Krause D.S.; von Kriegsheim A.; Much C.; Morgan M.; Gregory R.I.; Mead A.J.; O’carroll D.; Kranc K.R.	Mapperley, Christopher (57193584893); van de Lagemaat, Louie N. (7801525845); Lawson, Hannah (57191833197); Tavosanis, Andrea (57209540329); Paris, Jasmin (55212469700); Campos, Joana (57189054999); Wotherspoon, David (57209539165); Durko, Jozef (57219863352); Sarapuu, Annika (57209540197); Choe, Junho (55217312400); Ivanova, Ivayla (57195392238); Krause, Daniela S. (7202948932); von Kriegsheim, …	57193584893; 7801525845; 57191833197; 57209540329; 55212469700; 57189054999; 57209539165; 57219863352; 57209540197; 55217312400; 57195392238; 7202948932; 57097802100; 56398290700; 57194680986; 7402331999; 19337395700; 7004519485; 6508215563	The mRNA m6A reader YTHDF2 suppresses proinflammatory pathways and sustains hematopoietic stem cell function	2021	Journal of Experimental Medicine	10.1084/jem.20200829	https://www.scopus.com/inward/record.uri?eid=2-s2.0-85095802769&doi=10.1084%2fjem.20200829&partnerID=40&md5=205238278ec82036b82badaeb33adc5d	Centre for Regenerative Medicine, University of Edinburgh, Edinburgh, United Kingdom; Laboratory of Haematopoietic Stem Cell and Leukaemia Biology, Centre for Haemato-Oncology, Barts Cancer Institute, Queen Mary University of London, London, United Kingdom; Stem Cell Program, Division of Hematology/Oncology, Boston Children’s Hospital, Boston, MA, United States; Department of Biological Chemistry…	The mRNA N6-methyladenosine (m6A) modification has emerged as an essential regulator of normal and malignant hematopoiesis. Inactivation of the m6 A mRNA reader YTHDF2, which recognizes m6 A-modified transcripts to promote m6 A-mRNA degradation, results in hematopoietic stem cell (HSC) expansion and compromises acute myeloid leukemia. Here we investigate the long-term impact of YTHDF2 deletion on…		Adenosine; Animals; Cell Lineage; Cell Proliferation; Cellular Senescence; Gene Deletion; Hematopoiesis; Hematopoietic Stem Cell Transplantation; Hematopoietic Stem Cells; Inflammation; Lymphocytes; Mice, Inbred C57BL; Myeloid Cells; RNA, Messenger; RNA-Binding Proteins; adenosine; messenger RNA; N-methyladenosine; RNA binding protein; YTHDF2 protein, mouse; animal; bone marrow cell; C57BL mouse;…	Barbieri I., Tzelepis K., Pandolfini L., Shi J., Millan-Zambrano G., Rob-son S.C., Aspris D., Migliori V., Bannister A.J., Han N., Et al., Promoter-bound METTL3 maintains myeloid leukaemia by m<sup>6</sup>A-dependent translation control, Nature, 552, pp. 126-131, (2017); Cheng Y., Luo H., Izzo F., Pickering B.F., Nguyen D., Myers R., Schurer A., Gourkanti S., Bruning J.C., Vu L.P., Et al., m<sup>…	D. O’Carroll; Centre for Regenerative Medicine, University of Edinburgh, Edinburgh, United Kingdom; email: donal.ocarroll@ed.ac.uk; K.R. Kranc; Centre for Regenerative Medicine, University of Edinburgh, Edinburgh, United Kingdom; email: kamil.kranc@qmul.ac.uk	Rockefeller University Press	221007	JEMEA	33156926	English	J. Exp. Med.	Article	All Open Access; Hybrid Gold Open Access	Scopus	2-s2.0-85095802769
Hu T.; Xu L.; Jiang M.; Zhang F.; Li Q.; Li Z.; Wu C.; Ding J.; Li F.; Wang J.	Hu, Tingting (57771124800); Xu, Lijuan (58115334700); Jiang, Min (56949613400); Zhang, Fengbo (55934004500); Li, Qifeng (55703374700); Li, Zhiwei (57191701605); Wu, Chao (59108614700); Ding, Jianbing (36007134400); Li, Fengsen (37028365500); Wang, Jing (57200021087)	57771124800; 58115334700; 56949613400; 55934004500; 55703374700; 57191701605; 59108614700; 36007134400; 37028365500; 57200021087	N6-methyladenosine-methylomic landscape of lung tissues of mice with chronic obstructive pulmonary disease	2023	Frontiers in Immunology	10.3389/fimmu.2023.1137195	https://www.scopus.com/inward/record.uri?eid=2-s2.0-85152416915&doi=10.3389%2ffimmu.2023.1137195&partnerID=40&md5=40aec3940794045d07084507681d8ce5	Xinjiang Laboratory of Respiratory Disease Research, Traditional Chinese Medicine Hospital Affiliated to Xinjiang Medical University, Urumqi, China; Fourth Clinical Medical College, Xinjiang Medical University, Ürümqi, China; Department of Clinical Laboratory, First Affiliated Hospital of Xinjiang Medical University, Urumqi, China; Xinjiang Institute of Pediatrics, Children’s Hospital of Xinjiang…	Chronic obstructive pulmonary disease (COPD), a common respiratory disease, can be divided into stable phase and acute exacerbation phase (AECOPD) and is characterized by inflammation and hyper-immunity. Methylation of N6-methyladenosine (m6A) is an epigenetic modification that regulates the expression and functions of genes by influencing post-transcriptional RNA modifications. Its influence on …	COPD; lung tissue; m6A; MeRIP-seq; mouse; N6-methyladenosine	Adenosine; Animals; Inflammation; Lung; Mice; Pulmonary Disease, Chronic Obstructive; RNA; RNA, Messenger; 6 n methyladenosine; apolipoprotein A1; CD37 antigen; interleukin 1beta; leucine rich repeat protein; macrophage elastase; messenger RNA; myosin; perilipin 1; ryanodine receptor 1; sirtuin 1; stromal cell derived factor 1; transcriptome; adenosine; RNA; animal experiment; animal model; anima…	Lopez-Campos J.L., Tan W., Soriano J.B., Global burden of COPD, Respirology, 21, 1, pp. 14-23, (2016); Rabe K.F., Watz H., Chronic obstructive pulmonary disease, Lancet, 389, (2017); Bontsevich R.A., Adonina A.V., Vovk Y.R., Batisheva G.A., Cherenkova O.V., Ketova G.G., Et al., Management of chronic obstructive pulmonary disease, Arch Razi Inst, 77, 1, (2022); Li Y., Qian H., Yu K., Huang Y., The…	J. Wang; Xinjiang Laboratory of Respiratory Disease Research, Traditional Chinese Medicine Hospital Affiliated to Xinjiang Medical University, Urumqi, China; email: jingw_xj@163.com	Frontiers Media S.A.	16643224		37056763	English	Front. Immunol.	Article	All Open Access; Gold Open Access	Scopus	2-s2.0-85152416915
Wang J.; Wang L.; Tian X.; Luo L.	Wang, Juan (58799291300); Wang, Lei (59087380600); Tian, Xingfeng (58191360800); Luo, Lingping (58190295600)	58799291300; 59087380600; 58191360800; 58190295600	N6-methyladenosine reader YTHDF1 regulates the proliferation and migration of airway smooth muscle cells through m6A/cyclin D1 in asthma	2023	PeerJ	10.7717/peerj.14951	https://www.scopus.com/inward/record.uri?eid=2-s2.0-85153115732&doi=10.7717%2fpeerj.14951&partnerID=40&md5=580ba85b2b7e0cf117d35b8d765a1a4f	Department of Nursing, Fenyang Colleage of Shanxi Medical University, Fenyang, China; College of Nursing, Shanxi Medical University, Taiyuan, China; Department of Student Affairs, Fenyang Colleage of Shanxi Medical University, Fenyang, China	Asthma is a chronic inflammatory respiratory disease, which is involved in multiple pathologic molecular mechanisms and presents a huge challenge to clinic nursing. Emerging evidence suggests that N6-methyladenosine (m6A) plays critical roles in respiratory system disease. Thus, present work tried to investigate the functions of m6A reader YTHDF 1 in asthma. The results indicated that YTHDF1 sign…	Airway smooth muscle cells; Asthma; N6-methyladenosine	6 n methyladenosine; complementary DNA; cyclin D1; lentivirus vector; messenger RNA; peptides and proteins; platelet derived growth factor; RNA binding protein; short hairpin RNA; unclassified drug; YTHDF1 protein; airway remodeling; airway smooth muscle cell; Article; asthma; cell cycle progression; cell migration; cell proliferation; controlled study; gene knockdown; gene overexpression; gene s…	Ba M, Rawat S, Lao R, Grous M, Salmon M, Halayko AJ, Gerthoffer WT, Singer CA., Differential regulation of cytokine and chemokine expression by MK2 and MK3 in airway smooth muscle cells, Pulmonary Pharmacology & Therapeutics, 53, pp. 12-19, (2018); Chen Z, Zhong X, Xia M, Zhong J., The roles and mechanisms of the m6A reader protein YTHDF1 in tumor biology and human diseases, Molecular Therapy - N…	L. Luo; Department of Nursing, Fenyang Colleage of Shanxi Medical University, Fenyang, China; email: lingping_luo@yeah.net	PeerJ Inc.	21678359			English	PeerJ	Article	All Open Access; Gold Open Access	Scopus	2-s2.0-85153115732
Qin Y.; Li B.; Arumugam S.; Lu Q.; Mankash S.M.; Li J.; Sun B.; Li J.; Flavell R.A.; Li H.-B.; Ouyang X.	Qin, Yanqin (57201060842); Li, Binghua (56789222200); Arumugam, Suyavaran (57216814788); Lu, Qiuxia (57330351000); Mankash, Salah M. (57330351100); Li, Junzi (57200701776); Sun, Beicheng (57216984191); Li, Jiansheng (56125433800); Flavell, Richard A. (36047925100); Li, Hua-Bing (37361182500); Ouyang, Xinshou (57196917258)	57201060842; 56789222200; 57216814788; 57330351000; 57330351100; 57200701776; 57216984191; 56125433800; 36047925100; 37361182500; 57196917258	m6A mRNA methylation-directed myeloid cell activation controls progression of NAFLD and obesity	2021	Cell Reports	10.1016/j.celrep.2021.109968	https://www.scopus.com/inward/record.uri?eid=2-s2.0-85118825805&doi=10.1016%2fj.celrep.2021.109968&partnerID=40&md5=b3bbc370f92f663c5c4ce163bb61420f	Department of Internal Medicine, Section of Digestive Diseases, Yale University School of Medicine, New Haven, 06520, CT, United States; Shanghai Institute of Immunology, State Key Laboratory of Oncogenes and Related Genes, Shanghai Jiao Tong University School of Medicine, Shanghai, 200025, China; Shanghai Jiao Tong University School of Medicine-Yale Institute for Immune Metabolism, Shanghai Jiao…	N6-methyladenosine (m6A) RNA modification is a fundamental determinant of mRNA metabolism, but its role in innate immunity-driven non-alcoholic fatty liver disease (NAFLD) and obesity is not known. Here, we show that myeloid lineage-restricted deletion of the m6A “writer” protein Methyltransferase Like 3 (METTL3) prevents age-related and diet-induced development of NAFLD and obesity in mice with …	DDIT4; liver inflammation; mRNA m<sup>6</sup>A methylation; myeloid cells; NAFLD; non-alcoholic fatty liver disease	Adenosine; Animals; DNA Methylation; Female; Immunity, Innate; Macrophages; Male; Methyltransferases; Mice; Mice, Inbred C57BL; Mice, Knockout; Myeloid Cells; NF-kappa B; Non-alcoholic Fatty Liver Disease; Obesity; RNA, Messenger; DNA damage inducible transcript 4 protein; immunoglobulin enhancer binding protein; mammalian target of rapamycin; messenger RNA; methyltransferase; methyltransferase l…	Arendt B.M., Comelli E.M., Ma D.W., Lou W., Teterina A., Kim T., Fung S.K., Wong D.K., McGilvray I., Fischer S.E., Allard J.P., Altered hepatic gene expression in nonalcoholic fatty liver disease is associated with lower hepatic n-3 and n-6 polyunsaturated fatty acids, Hepatology, 61, pp. 1565-1578, (2015); Batista P.J., Molinie B., Wang J., Qu K., Zhang J., Li L., Bouley D.M., Lujan E., Haddad B…	R.A. Flavell; Department of Immunobiology, Yale University School of Medicine, New Haven, 06520, United States; email: richard.flavell@yale.edu; H.-B. Li; Shanghai Institute of Immunology, State Key Laboratory of Oncogenes and Related Genes, Shanghai Jiao Tong University School of Medicine, Shanghai, 200025, China; email: huabing.li@shsmu.edu.cn; X. Ouyang; Department of Internal Medicine, Sectio…	Elsevier B.V.	22111247		34758326	English	Cell Rep.	Article	All Open Access; Gold Open Access; Green Open Access	Scopus	2-s2.0-85118825805
Gao J.; Li Y.; Liu Z.; Wang D.; Zhang H.	Gao, Jie (57945148000); Li, Yan (57221624533); Liu, Zijin (57943680900); Wang, Dong (57944901500); Zhang, Huawu (57944164400)	57945148000; 57221624533; 57943680900; 57944901500; 57944164400	Acetaminophen changes the RNA m6A levels and m6A-related proteins expression in IL-1β-treated chondrocyte cells	2022	BMC Molecular and Cell Biology	10.1186/s12860-022-00444-3	https://www.scopus.com/inward/record.uri?eid=2-s2.0-85140781104&doi=10.1186%2fs12860-022-00444-3&partnerID=40&md5=d8293ddeff8dce5d1637af7bb06d6944	Department of Joint Surgery, Shandong Second Provincial General Hospital, No.4 Duanxing West Road, Huaiyin District, Shandong, Jinan, 250022, China	Background: Acetaminophen is commonly recommended for the early analgesia of osteoarthritis. However, the molecular mechanism by which it acts remains unknown. The aim of this study is to investigate the effect of acetaminophen on inflammation and extracellular matrix degradation in human chondrocytes, and the possible molecular mechanisms involved in its effect. Methods: The normal chondrocyte c…	Acetaminophen; ALKBH5; Chondrocyte cell; Extracellular matrix; Inflammatory factors; Interleukin-1β; RNA N<sup>6</sup>-methyladenosine modification	Acetaminophen; Cells, Cultured; Chondrocytes; Cycloleucine; Humans; Inflammation; Interleukin-1beta; Interleukin-6; Interleukin-8; Necrosis; RNA; 6 n methyladenosine; aggrecan; alkylated DNA repair protein alkB homolog 5; collagen type 10; collagen type 2; collagenase 3; cycloleucine; interleukin 1beta; interleukin 6; interleukin 8; methyltransferase; methyltransferase like 3; paracetamol; tumor …	Disease G.B.D., Injury I., Prevalence C., Global, regional, and national incidence, prevalence, and years lived with disability for 354 diseases and injuries for 195 countries and territories, 1990-2017: a systematic analysis for the Global Burden of Disease Study 2017, Lancet., 392, pp. 1789-1858, (2018); Vos T., Flaxman A.D., Naghavi M., Lozano R., Michaud C., Ezzati M., Et al., Years lived wit…	H. Zhang; Department of Joint Surgery, Shandong Second Provincial General Hospital, Jinan, No.4 Duanxing West Road, Huaiyin District, Shandong, 250022, China; email: zhanghuawu100@126.com	BioMed Central Ltd	26618850		36303109	English	BMC Mol. Cell Biol.	Article	All Open Access; Gold Open Access; Green Open Access	Scopus	2-s2.0-85140781104
Yu R.; Li Q.; Feng Z.; Cai L.; Xu Q.	Yu, Ruiqing (57207826980); Li, Qimeng (55644715500); Feng, Zhihui (57200044453); Cai, Luhui (57207829929); Xu, Qiong (36239393500)	57207826980; 55644715500; 57200044453; 57207829929; 36239393500	m6A reader YTHDF2 regulates lps-induced inflammatory response	2019	International Journal of Molecular Sciences	10.3390/ijms20061323	https://www.scopus.com/inward/record.uri?eid=2-s2.0-85063013389&doi=10.3390%2fijms20061323&partnerID=40&md5=90a43b917cbf49c6cb4b8cad70914a9d	Guanghua School of Stomatology & Guangdong Provincial Key Laboratory of Stomatology, Sun Yat-sen University, Guangzhou, 510055, China	N6-methyladenosine (m6A) is an abundant mRNA modification that affects multiple biological processes, including those involved in the cell stress response and viral infection. YTH domain family 2 (YTHDF2) is an m6A-binding protein that affects the localization and stability of targeted mRNA. RNA-binding proteins (RBPs) can regulate the stability of inflammatory gene mRNA transcripts, thus partici…	Inflammatory reaction; MAPK; MRNA stability; NF-κB; YTHDF2	Adenosine; Animals; Cytokines; Gene Expression Regulation; Inflammation; Intracellular Signaling Peptides and Proteins; Lipopolysaccharides; MAP Kinase Kinase 4; Mice; Phosphorylation; Protein-Serine-Threonine Kinases; RAW 264.7 Cells; RNA-Binding Proteins; Signal Transduction; Up-Regulation; 6 n methyladenosine; complementary DNA; cytokine; glyceraldehyde 3 phosphate dehydrogenase (NADP); immuno…	Medzhitov R., Origin and physiological roles of inflammation, Nature, 454, pp. 428-435, (2008); Park S.B., Park G.H., Um Y., Kim H.N., Song H.M., Kim N., Kim H.S., Jeong J.B., Wood-cultivated ginseng exerts anti-inflammatory effect in LPS-stimulated RAW264.7 cells, Int. J. Biol. Macromol., 116, pp. 327-334, (2018); Zou Y.H., Zhao L., Xu Y.K., Bao J.M., Liu X., Zhang J.S., Li W., Ahmed A., Yin S.,…	Q. Xu; Guanghua School of Stomatology & Guangdong Provincial Key Laboratory of Stomatology, Sun Yat-sen University, Guangzhou, 510055, China; email: xqiong@mail.sysu.edu.cn	MDPI AG	16616596		30875984	English	Int. J. Mol. Sci.	Article	All Open Access; Gold Open Access; Green Open Access	Scopus	2-s2.0-85063013389
Liu T.; Zhuang X.X.; Qin X.J.; Wei L.B.; Gao J.R.	Liu, Tao (56673201300); Zhuang, Xing Xing (56489634600); Qin, Xiu Juan (57155645000); Wei, Liang Bing (56067392800); Gao, Jia Rong (55622972600)	56673201300; 56489634600; 57155645000; 56067392800; 55622972600	The potential role of N6-methyladenosine modification of LncRNAs in contributing to the pathogenesis of chronic glomerulonephritis	2023	Inflammation Research	10.1007/s00011-023-01695-2	https://www.scopus.com/inward/record.uri?eid=2-s2.0-85146852340&doi=10.1007%2fs00011-023-01695-2&partnerID=40&md5=0701fca303e2f9d0c8b3c98faf208f81	Department of Pharmacy, The First Affiliated Hospital of Anhui University of Chinese Medicine, Anhui, Hefei, 230012, China; Department of Pharmacy, Chaohu Hospital of Anhui Medical University, Anhui, Chaohu, 238000, China; College of Pharmacy, Anhui University of Chinese Medicine, Anhui, Hefei, 230011, China; Anhui Province Key Laboratory of Chinese Medicinal Formula, Anhui, Hefei, 230031, China	Background: Increasing evidence indicates that N6-methyladenosine (m6A) modification of mRNAs has been shown to play a critical role in the occurrence and development of many diseases, while little is known about m6A modification in long non-coding RNAs (LncRNAs). Our study aims to investigate the potential functions of LncRNA m6A modifications in lipopolysaccharide (LPS)-induced mouse mesangial …	Chronic glomerulonephritis; LncRNA; METTL3; MMCs; N6-methyladenosine	Animals; Chronic Disease; Cytokines; Glomerulonephritis; Mice; RNA, Long Noncoding; RNA, Messenger; 6 n methyladenosine; competing endogenous RNA; cytokine; interleukin 6; lipopolysaccharide; long untranslated RNA; messenger RNA; methyltransferase; microRNA; small interfering RNA; tumor necrosis factor; tumor necrosis factor activator; untranslated RNA; cytokine; long untranslated RNA; messenger …	Gupta R.A., Shah N., Wang K.C., Et al., Long non-coding RNA HOTAIR reprograms chromatin state to promote cancer metastasis, Nature, 464, 7291, pp. 1071-1076, (2010); Ariel F., Lucero L., Christ A., Et al., R-loop mediated trans action of the APOLO long noncoding RNA, Mol Cell, 77, 5, pp. 1055-1065.e4, (2020); Zhang Y., Pitchiaya S., Cieslik M., Et al., Analysis of the androgen receptor-regulated …	J.R. Gao; Department of Pharmacy, The First Affiliated Hospital of Anhui University of Chinese Medicine, Hefei, Anhui, 230012, China; email: zyfygjr2006@163.com	Springer Science and Business Media Deutschland GmbH	10233830	INREF	36700958	English	Inflamm. Res.	Article		Scopus	2-s2.0-85146852340
Tian M.; Mao L.; Zhang L.	Tian, Mi (58591000700); Mao, Lei (36878079000); Zhang, Li (57191834635)	58591000700; 36878079000; 57191834635	Crosstalk among N6-methyladenosine modification and RNAs in central nervous system injuries	2022	Frontiers in Cellular Neuroscience	10.3389/fncel.2022.1013450	https://www.scopus.com/inward/record.uri?eid=2-s2.0-85139913615&doi=10.3389%2ffncel.2022.1013450&partnerID=40&md5=a2583332f1cdaa3ef357ca0f90e13ec8	Department of Anesthesiology, Affiliated Zhongda Hospital of Southeast University, Jiangsu, Nanjing, China; Department of Neurosurgery, Jinling Hospital, School of Medicine, Nanjing University, Jiangsu, Nanjing, China	Central nervous system (CNS) injuries, including traumatic brain injury (TBI), intracerebral hemorrhage (ICH) and ischemic stroke, are the most common cause of death and disability around the world. As the most common modification on ribonucleic acids (RNAs), N6-methyladenosine (m6A) modification has recently attracted great attentions due to its functions in determining the fate of RNAs through …	apoptosis; central nervous system injuries; downstream molecules; inflammation; m6A modification; neurological impairment	6 n methyladenosine; alkylated DNA repair protein alkB homolog 5; alpha ketoglutarate dependent dioxygenase alkB homolog 3; alpha ketoglutarate dependent dioxygenase FTO; cryopyrin; long untranslated RNA; long untranslated RNA D63785; methyltransferase; n6 adenosine methyltransferase catalytic subunit 14; n6 adenosine methyltransferase catalytic subunit 3; phosphatidylinositol 3,4,5 trisphosphate…	Akcaoz A., Akgul B., Epitranscriptomics changes the play: m(6)A RNA modifications in apoptosis, Adv. Exp. Med. Biol, (2022); Al Mamun A., Suchi S.A., Aziz M.A., Zaeem M., Munir F., Wu Y., Et al., Pyroptosis in acute pancreatitis and its therapeutic regulation, Apoptosis, 27, pp. 465-481, (2022); Alcaraz L.P., Prellwitz L., Alves G., Souza-Fabjan J.M.G., Dias A.J.B., Role of phosphoinositide 3-kin…	L. Zhang; Department of Neurosurgery, Jinling Hospital, School of Medicine, Nanjing University, Nanjing, Jiangsu, China; email: zhangli2007js@126.com	Frontiers Media S.A.	16625102			English	Front. Cell. Neurosci.	Review	All Open Access; Gold Open Access; Green Open Access	Scopus	2-s2.0-85139913615
Tang S.; Meng J.; Tan J.; Liu X.; Zhou H.; Li N.; Hou S.	Tang, Shiyun (57684671200); Meng, Jiayu (57218585836); Tan, Jun (57218587434); Liu, Xianyang (57439233500); Zhou, Hongxiu (57218581149); Li, Na (57307977300); Hou, Shengping (16646157700)	57684671200; 57218585836; 57218587434; 57439233500; 57218581149; 57307977300; 16646157700	N6-methyladenosine demethylase FTO regulates inflammatory cytokine secretion and tight junctions in retinal pigment epithelium cells	2022	Clinical Immunology	10.1016/j.clim.2022.109080	https://www.scopus.com/inward/record.uri?eid=2-s2.0-85135600190&doi=10.1016%2fj.clim.2022.109080&partnerID=40&md5=cc98146203e501858d59a6716228e449	The First Affiliated Hospital of Chongqing Medical University, Chongqing, China; Chongqing Key Laboratory of Ophthalmology, Chongqing, China; Chongqing Eye Institute, Chongqing, China; Chongqing Branch of National Clinical Research Center for Ocular Diseases, Chongqing, China; College of Basic Medicine, Chongqing Medical University, Chongqing, China	Objective: Uveitis is an intraocular inflammatory disease. Epigenetics has been associated with its pathogenesis. However, the role of N6-methyladenosine (m6A) in uveitis has not been reported. We aimed to examine the role of m6A and its regulatory mechanism in experimental autoimmune uveitis (EAU). Methods: The mRNA expression of m6A-related methylase and demethylase of retinal pigment epitheliu…	Experimental autoimmune uveitis; FTO; N6-methyladenosine; Retinal pigment epithelium; Uveitis	Adenosine; Alpha-Ketoglutarate-Dependent Dioxygenase FTO; Animals; Cytokines; Mice; Occludin; Retinal Pigment Epithelium; Tight Junctions; Uveitis; 6 n methyladenosine; activating transcription factor 4; interleukin 6; interleukin 8; monocyte chemotactic protein 1; n demethylase; occludin; protein fto; STAT3 protein; tight junction protein; unclassified drug; adenosine; alpha ketoglutarate depend…	Forrester J., Uveitis: pathogenesis [J], Lancet (Lond. Engl.), 338, 8781, pp. 1498-1501, (1991); Kerr E.C., Copland D.A., Dick A.D., Et al., The dynamics of leukocyte infiltration in experimental autoimmune uveoretinitis [J], Prog. Retin. Eye Res., 27, 5, pp. 527-535, (2008); Liu L., Liu X., Roles of drug transporters in blood-retinal barrier, Adv. Exp. Med. Biol., 1141, pp. 467-504, (2019); Finn…	S. Hou; The First Affiliated Hospital of Chongqing Medical University, Chongqing, 400016, China; email: sphou828@163.com; N. Li; College of Basic Medicine, Chongqing Medical University, Chongqing, China; email: coco0411@126.com	Academic Press Inc.	15216616	CLIIF	35878734	English	Clin. Immunol.	Article		Scopus	2-s2.0-85135600190
Chen L.; He Y.; Zhu J.; Zhao S.; Qi S.; Chen X.; Zhang H.; Ni Z.; Zhou Y.; Chen G.; Liu S.; Xie T.	Chen, Lu (59128590400); He, Ying (57580942200); Zhu, Jinyu (57221470391); Zhao, Shujuan (49862552600); Qi, Shasha (57221471707); Chen, Xudong (57580647400); Zhang, Hao (57189028460); Ni, Ziheng (58236321500); Zhou, Yuan (57798869300); Chen, Gongxing (57195919672); Liu, Shuiping (57203664388); Xie, Tian (35235678800)	59128590400; 57580942200; 57221470391; 49862552600; 57221471707; 57580647400; 57189028460; 58236321500; 57798869300; 57195919672; 57203664388; 35235678800	The roles and mechanism of m6A RNA methylation regulators in cancer immunity	2023	Biomedicine and Pharmacotherapy	10.1016/j.biopha.2023.114839	https://www.scopus.com/inward/record.uri?eid=2-s2.0-85158005080&doi=10.1016%2fj.biopha.2023.114839&partnerID=40&md5=066b8123fda52ee27ff5437dad76abad	School of Pharmacy and Department of Respiratory Medicine, the Affiliated Hospital of Hangzhou Normal University, Hangzhou Normal University, Hangzhou, 311121, China; Key Laboratory of Elemene Class Anti-Cancer Chinese Medicines, Engineering Laboratory of Development and Application of Traditional Chinese Medicines, Collaborative Innovation Center of Traditional Chinese Medicines of Zhejiang Prov…	N6-methyladenosine (m6A), the most common internal modification in RNA, can be regulated by three types of regulators, including methyltransferases (writers), demethylases (erasers), and m6A binding proteins (readers). Recently, immunotherapy represented by immune checkpoint blocking has increasingly become an effective cancer treatment, and increasing shreds of evidence show that m6A RNA methyla…	Cancer immunity; Diagnosis; Immunotherapy; Inflammation; M<sup>6</sup>A RNA methylation; Prognosis	Adenosine; Humans; Methylation; Methyltransferases; Neoplasms; RNA; Tumor Microenvironment; 6 n methyladenosine; messenger RNA; RNA; untranslated RNA; adenosine; methyltransferase; RNA; cancer diagnosis; cancer prognosis; human; nonhuman; reading; Review; RNA methylation; tumor immunity; genetics; metabolism; methylation; neoplasm; pathology; tumor microenvironment	Vu L.P., Cheng Y., Kharas M.G., The Biology of m(6)A RNA methylation in normal and malignant hematopoiesis, Cancer Discov., 9, 1, pp. 25-33, (2019); Desrosiers R., Friderici K., Rottman F., 71, 10, pp. 3971-3975, (1974); Yadav P.K., Rajasekharan R., The m(6)A methyltransferase Ime4 epitranscriptionally regulates triacylglycerol metabolism and vacuolar morphology in haploid yeast cells, J. Biol. C…	G. Chen; School of Pharmacy, Hangzhou Normal University, Hangzhou, 311121, China; email: 20070002@hznu.edu.cn	Elsevier Masson s.r.l.	7533322	BIPHE	37156113	English	Biomed. Pharmacother.	Review	All Open Access; Gold Open Access	Scopus	2-s2.0-85158005080
Xu X.; Huang J.; Ocansey D.K.W.; Xia Y.; Zhao Z.; Xu Z.; Yan Y.; Zhang X.; Mao F.	Xu, Xinwei (57203155506); Huang, Jintu (57226358599); Ocansey, Dickson Kofi Wiredu (57214318101); Xia, Yuxuan (58459884500); Zhao, Zihan (58300346900); Xu, Zhiwei (57223092686); Yan, Yongmin (23037518000); Zhang, Xu (57192509062); Mao, Fei (35277500800)	57203155506; 57226358599; 57214318101; 58459884500; 58300346900; 57223092686; 23037518000; 57192509062; 35277500800	The emerging clinical application of m6A RNA modification in inflammatory bowel disease and its associated colorectal cancer	2021	Journal of Inflammation Research	10.2147/JIR.S320449	https://www.scopus.com/inward/record.uri?eid=2-s2.0-85111274581&doi=10.2147%2fJIR.S320449&partnerID=40&md5=77ccd5b739124c1c0023901865f1d0bd	Department of Clinical Laboratory Diagnostics, Key Laboratory of Medical Science and Laboratory Medicine of Jiangsu Province, School of Medicine, Jiangsu University, Jiangsu, Zhenjiang, 212013, China; Clinical Laboratory Department, The People’s Hospital of Danyang, Affiliated Danyang Hospital of Nantong University, Jiangsu, Zhenjiang, 212300, China; Department of Clinical Laboratory Diagnostics,…	Methylation, first proposed in DNAs, but later found in RNAs, serves as one of the most widespread epigenetic modifications in eukaryotes, where N6-methyladenosine (m6A) modification has been found to play an important role in a variety of cancers including colorectal cancer (CRC). Under the action of various enzymes and proteins, the regulatory role of m6A in RNAs and immune cells has also been …	Colorectal cancer; Inflammatory bowel disease; Intestinal mucosal immunity; N6-methyladenosine; Non-coding RNA	6 n methyladenosine; circular ribonucleic acid; exportin 1; glucose transporter 1; heat shock transcription factor 1; long untranslated RNA; RNA; suppressor of cytokine signaling; transcription factor Sox2; transcription factor Sox4; Article; Bifidobacterium; biogenesis; colitis; colorectal cancer; dendritic cell; genetic modification; human; inflammatory bowel disease; Lactobacillus; mucosal imm…	Bernstein CN, Benchimol EI, Bitton A, Et al., The impact of inflammatory bowel disease in Canada 2018: extra-intestinal diseases in IBD, J Can Assoc Gastroenterol, 2, pp. S73-s80, (2019); Zhang YZ, Li YY., Inflammatory bowel disease: pathogenesis, World J Gastroenterol, 20, 1, pp. 91-99, (2014); Kaplan GG., The global burden of IBD: from 2015 to 2025, Nat Rev Gastroenterol Hepatol, 12, 12, pp. 72…	F. Mao; Key Laboratory of Medical Science and Laboratory Medicine of Jiangsu Province, School of Medicine, Jiangsu University, Zhenjiang, Jiangsu, 212013, China; email: maofei2003@ujs.edu.cn	Dove Medical Press Ltd	11787031			English	J. Inflamm. Res.	Article	All Open Access; Gold Open Access	Scopus	2-s2.0-85111274581
Wang Q.; Fan X.; Sheng Q.; Yang M.; Zhou P.; Lu S.; Gao Y.; Kong Z.; Shen N.; Lv Z.; Wang R.	Wang, Qimeng (58104360300); Fan, Xiaoting (58104360400); Sheng, Qinghao (58033188800); Yang, Meilin (58032178500); Zhou, Ping (58104360500); Lu, Shangwei (58032511300); Gao, Ying (57205210454); Kong, Zhijuan (58032677500); Shen, Ning (58657824800); Lv, Zhimei (48061300900); Wang, Rong (55618606300)	58104360300; 58104360400; 58033188800; 58032178500; 58104360500; 58032511300; 57205210454; 58032677500; 58657824800; 48061300900; 55618606300	N6-methyladenosine methylation in kidney injury	2023	Clinical Epigenetics	10.1186/s13148-023-01586-7	https://www.scopus.com/inward/record.uri?eid=2-s2.0-85174605390&doi=10.1186%2fs13148-023-01586-7&partnerID=40&md5=bb913ed51677ddb1006ee0f88af970cd	Department of Nephrology, Shandong Provincial Hospital Affiliated to Shandong First Medical University, Shandong, Jinan, 250021, China; Department of Nephrology, Shandong Provincial Hospital, Shandong University, Shandong, Jinan, 250021, China	Multiple mechanisms are involved in kidney damage, among which the role of epigenetic modifications in the occurrence and development of kidney diseases is constantly being revealed. However, N6-methyladenosine (M6A), a well-known post-transcriptional modification, has been regarded as the most prevalent epigenetic modifications in higher eukaryotic, which is involved in various biological proces…	Epigenetic modification; Kidney injury; M6A; The regulation of M6A	DNA Methylation; Humans; Kidney; Kidney Diseases; RNA, Messenger; 6 n methyladenosine; messenger RNA; methyltransferase; messenger RNA; acute kidney failure; apoptosis; autophagy (cellular); cell damage; chemical modification; chronic kidney failure; disease exacerbation; endothelium cell; epigenetic modification; epithelial mesenchymal transition; ferroptosis; glomerulus epithelium; human; infla…	Eckardt K.-U., Coresh J., Devuyst O., Johnson R.J., Kottgen A., Levey A.S., Et al., Evolving importance of kidney disease: from subspecialty to global health burden, The Lancet, 382, 9887, pp. 158-169, (2013); Schaub J.A., Hamidi H., Subramanian L., Kretzler M., Systems biology and kidney disease, Clin J Am Soc Nephrol, 15, 5, pp. 695-703, (2020); Zhao Y., Shi Y., Shen H., Xie W., m(6)A-binding p…	Z. Lv; Department of Nephrology, Shandong Provincial Hospital Affiliated to Shandong First Medical University, Jinan, Shandong, 250021, China; email: lyuzhimei@126.com; R. Wang; Department of Nephrology, Shandong Provincial Hospital Affiliated to Shandong First Medical University, Jinan, Shandong, 250021, China; email: sd_wangrong@163.com	BioMed Central Ltd	18687075		37865763	English	Clin. Epigenetics	Review	All Open Access; Gold Open Access	Scopus	2-s2.0-85174605390
Lan J.; Xu B.; Shi X.; Pan Q.; Tao Q.	Lan, Jianzi (57211187502); Xu, Bowen (57211189141); Shi, Xin (57211191334); Pan, Qi (57766617400); Tao, Qing (57211186562)	57211187502; 57211189141; 57211191334; 57766617400; 57211186562	WTAP-mediated N 6-methyladenosine modification of NLRP3 mRNA in kidney injury of diabetic nephropathy	2022	Cellular and Molecular Biology Letters	10.1186/s11658-022-00350-8	https://www.scopus.com/inward/record.uri?eid=2-s2.0-85132959929&doi=10.1186%2fs11658-022-00350-8&partnerID=40&md5=6e8ba98da4dad4dc68e7dadd5f7da97b	Department of Traditional Chinese Medicine, Shanghai East Hospital, Tongji University School of Medicine, No. 150, Jimo Road, Pudong District, Shanghai, 200120, China	Background: Diabetic nephropathy (DN) is prevalent in patients with diabetes. N6-methyladenosine (m6A) methylation has been found to cause modification of nucleotide-binding oligomerization domain, leucine-rich repeat, and pyrin domain-containing (NLRP) 3, which is involved in cell pyroptosis and inflammation. WTAP is a key gene in modulating NLRP3 m6A. Methods: In this study, WTAP was silenced o…	High glucose; Inflammation; N<sup>6</sup>-methyladenosine; NLRP3; Pyroptosis; WTAP	Adenosine; Animals; Cell Cycle Proteins; Cytokines; Diabetes Mellitus; Diabetic Nephropathies; Histone Acetyltransferases; Humans; Inflammasomes; Inflammation; Kidney; Mice; NLR Family, Pyrin Domain-Containing 3 Protein; RNA Splicing Factors; RNA, Messenger; 6 n methyladenosine; cryopyrin; histone acetyltransferase; histone acetyltransferase PCAF; inflammasome; interleukin 18; interleukin 1beta; …	Xue R., Gui D., Zheng L., Zhai R., Wang F., Wang N., Mechanistic insight and management of diabetic nephropathy: recent progress and future perspective, J Diabetes Res, 2017, (2017); Shahbazian H., Rezaii I., Diabetic kidney disease; review of the current knowledge, J Renal Inj Prev, 2, 2, pp. 73-80, (2013); Zhang H., Wang Z., Effect and regulation of the NLRP3 inflammasome during renal fibrosis,…	J. Lan; Department of Traditional Chinese Medicine, Shanghai East Hospital, Tongji University School of Medicine, Shanghai, No. 150, Jimo Road, Pudong District, 200120, China; email: dffjsl112@126.com	BioMed Central Ltd	14258153	CMBLF	35761192	English	Cell. Mol. Biol. Lett.	Article	All Open Access; Gold Open Access; Green Open Access	Scopus	2-s2.0-85132959929
He X.; Zhang L.; Liu S.; Wang J.; Liu Y.; Xiong A.; Jiang M.; Luo L.; Ying X.; Li G.	He, Xiang (57202160263); Zhang, Lei (57207390793); Liu, Shengbin (57223237786); Wang, Junyi (57416426800); Liu, Yao (58891354200); Xiong, Anying (57194647514); Jiang, Manling (57435350900); Luo, Li (57435077900); Ying, Xiong (57762669700); Li, Guoping (55935694800)	57202160263; 57207390793; 57223237786; 57416426800; 58891354200; 57194647514; 57435350900; 57435077900; 57762669700; 55935694800	Methyltransferase-like 3 leads to lung injury by up-regulation of interleukin 24 through N6-methyladenosine-dependent mRNA stability and translation efficiency in mice exposed to fine particulate matter 2.5	2022	Environmental Pollution	10.1016/j.envpol.2022.119607	https://www.scopus.com/inward/record.uri?eid=2-s2.0-85132792777&doi=10.1016%2fj.envpol.2022.119607&partnerID=40&md5=d9901f2edeb90403dc0ad1becc66d7a0	Laboratory of Allergy and Precision Medicine, Chengdu Institute of Respiratory Health, The Third People's Hospital of Chengdu, Affiliated Hospital of Southwest Jiaotong University, Chengdu, 610031, China; Department of Pulmonary and Critical Care Medicine, Chengdu Third People's Hospital Branch of National Clinical Research Center for Respiratory Disease, Affiliated Hospital of ChongQing Medical …	Fine particulate matter 2.5 (PM2.5) exposure leads to the progress of pulmonary disease. It has been reported that N6-methyladenosine (m6A) modification was involved in various biological processes and diseases. However, the critical role of m6A modification in pulmonary disease during PM2.5 exposure remains elusive. Here, we revealed that lung inflammation and mucus production caused by PM2.5 we…	Epigenetics; IL24; Lung injury; METTL3; PM2.5; YTHDF1	Adenosine; Animals; Interleukins; Lung Injury; Methyltransferases; Mice; Particulate Matter; RNA Stability; Up-Regulation; Biological organs; Mammals; Particles (particulate matter); Pathology; Polymerase chain reaction; Pulmonary diseases; RNA; 6 n methyladenosine; interleukin 24; messenger RNA; methyltransferase; methyltransferase like 3; RNA binding protein; unclassified drug; YTH n6 methylade…	Aaron C.P., Hoffman E.A., Kawut S.M., Austin J.H., Budoff M., Michos E.D., Stukovsky K.H., Sack C., Szpiro A.A., Watson K.D., Ambient air pollution and pulmonary vascular volume on computed tomography: the MESA Air Pollution and Lung cohort studies, Eur. Respir. J., 53, (2019); Antanaviciute A., Baquero-Perez B., Watson C.M., Harrison S.M., Lascelles C., Crinnion L., Markham A.F., Bonthron D.T., …	G. Li; Laboratory of Allergy and Precision Medicine, Chengdu Institute of Respiratory Health, the Third People's Hospital of Chengdu, Affiliated Hospital of Southwest Jiaotong University, Chengdu, 610031, China; email: liguoping@swjtu.edu.cn	Elsevier Ltd	2697491	ENPOE	35718042	English	Environ. Pollut.	Article	All Open Access; Hybrid Gold Open Access	Scopus	2-s2.0-85132792777
Wu J.; Yuan X.-H.; Jiang W.; Lu Y.-C.; Huang Q.-L.; Yang Y.; Qie H.-J.; Liu J.-T.; Sun H.-Y.; Tang L.-J.	Wu, Jun (57221513551); Yuan, Xiao-Hui (57213595475); Jiang, Wen (57216162545); Lu, Yi-Chen (57353287800); Huang, Qi-Lin (57204963216); Yang, Yi (57218495744); Qie, Hua-Ji (57353065600); Liu, Jiang-Tao (57352732300); Sun, Hong-Yu (55838296900); Tang, Li-Jun (7402081039)	57221513551; 57213595475; 57216162545; 57353287800; 57204963216; 57218495744; 57353065600; 57352732300; 55838296900; 7402081039	Genome-wide map of N6-methyladenosine circular RNAs identified in mice model of severe acute pancreatitis	2021	World Journal of Gastroenterology	10.3748/wjg.v27.i43.7530	https://www.scopus.com/inward/record.uri?eid=2-s2.0-85119926207&doi=10.3748%2fwjg.v27.i43.7530&partnerID=40&md5=6cc5250a2b90325ec6ceeb83c4d6d469	Department of General Surgery and Pancreatic Injury and Repair, Key Laboratory of Sichuan Province, The General Hospital of Western Theater Command, Sichuan Province, Chengdu, 610036, China; College of Medicine, Southwest Jiaotong University, Sichuan Province, Chengdu, 610036, China; Laboratory of Basic Medicine, The General Hospital of Western Theater Command, Sichuan Province, Chengdu, 610036, …	BACKGROUND Severe acute pancreatitis (SAP) is a deadly inflammatory disease with complex pathogenesis and lack of effective therapeutic options. N6-methyladenosine (m6A) modification of circRNAs plays important roles in physiological and pathological processes. However, the roles of m6A circRNA in the pathological process of SAP remains unknown. AIM To identify transcriptome-wide map of m6A circR…	Circular RNAs; Epigenetic analysis; MeRIP-seq; N6-methyladenosine; Severe acute pancreatitis	Acute Disease; Adenosine; Animals; Mice; Mice, Inbred C57BL; MicroRNAs; Pancreatitis; RNA, Circular; 6 n methyladenosine; alkylated DNA repair protein alkB homolog 5; circular ribonucleic acid; microRNA; microRNA 216b; microRNA 24; microRNA 24 3p; microRNA 324 5p; microRNA 3p; microRNA 762; microRNA 92b; taurocholic acid; transcriptome; unclassified drug; adenosine; microRNA; N-methyladenosine; a…	Lee PJ, Papachristou GI., New insights into acute pancreatitis, Nat Rev Gastroenterol Hepatol, 16, pp. 479-496, (2019); Trikudanathan G, Wolbrink DRJ, van Santvoort HC, Mallery S, Freeman M, Besselink MG., Current Concepts in Severe Acute and Necrotizing Pancreatitis: An Evidence-Based Approach, Gastroenterology, 156, pp. 1994-2007, (2019); Garg PK, Singh VP., Organ Failure Due to Systemic Injury…	L.-J. Tang; Department of General Surgery and Pancreatic Injury and Repair, Key Laboratory of Sichuan Province, The General Hospital of Western Theater Command, Chengdu, Sichuan Province, 610036, China; email: tanglj2016@163.com	Baishideng Publishing Group Inc	10079327	WJGAF	34887647	English	World J. Gastroenterol.	Article	All Open Access; Hybrid Gold Open Access	Scopus	2-s2.0-85119926207
Nie K.; Yi J.; Yang Y.; Deng M.; Yang Y.; Wang T.; Chen X.; Zhang Z.; Wang X.	Nie, Kai (57211085492); Yi, Jun (57216898357); Yang, Yuanyuan (57206205865); Deng, Minzi (57191527046); Yang, Yan (59059808700); Wang, Tianyu (57439973200); Chen, Xuejie (57215278186); Zhang, Zhaoyu (57423862000); Wang, Xiaoyan (57273896900)	57211085492; 57216898357; 57206205865; 57191527046; 59059808700; 57439973200; 57215278186; 57423862000; 57273896900	A Broad m6A Modification Landscape in Inflammatory Bowel Disease	2022	Frontiers in Cell and Developmental Biology	10.3389/fcell.2021.782636	https://www.scopus.com/inward/record.uri?eid=2-s2.0-85123998629&doi=10.3389%2ffcell.2021.782636&partnerID=40&md5=53bc08760aa709fd8b430038ccdea1e0	Department of Gastroenterology, The Third Xiangya Hospital of Central South University, Changsha, China; Hunan Key Laboratory of Nonresolving Inflammation and Cancer, Cancer Research Institute, Central South University, Changsha, China; Department of Gastroenterology, The Xiangya Hospital of Central South University, Changsha, China; Cancer Research Institute, Central South University, Changsha, …	Background and Aims: N6-Methyladenosine (m6A) is the most common post-transcriptional modification on eukaryotic mRNA, affecting the mRNA’s fate. The role of m6A regulation in inflammatory bowel disease is unclear. Here, we investigated the m6A landscape in inflammatory bowel diseases (IBD). Methods: Eleven human IBD microarray datasets were recruited from the Gene Expression Omnibus database and…	biologics response; epigenetics; inflammatory bowel diseases; N6-methyladenosine; RNA modifications	6 n methyladenosine; heterogeneous nuclear ribonucleoprotein A2 B1; initiation factor 3; insulin like growth factor 2 mRNA binding protein 2; methyltransferase; unclassified drug; zinc finger CCHC type containing 4; adolescent; adult; Article; clinical article; clinical feature; clinical outcome; cohort analysis; colon biopsy; consensus; Crohn disease; data base; differential expression analysis;…	Aran D., Hu Z., Butte A.J., xCell: Digitally Portraying the Tissue Cellular Heterogeneity Landscape, Genome Biol, 18, 1, (2017); Argollo M., Gilardi D., Peyrin-Biroulet C., Chabot J.-F., Peyrin-Biroulet L., Danese S., Comorbidities in Inflammatory Bowel Disease: a Call for Action, Lancet Gastroenterol. Hepatol, 4, 8, pp. 643-654, (2019); Backman J.D., Li A.H., Marcketta A., Sun D., Mbatchou J., K…	X. Wang; Department of Gastroenterology, The Third Xiangya Hospital of Central South University, Changsha, China; email: wxy220011@163.com; Z. Zhang; Hunan Key Laboratory of Nonresolving Inflammation and Cancer, Cancer Research Institute, Central South University, Changsha, China; email: 2511996036@qq.com	Frontiers Media S.A.	2296634X			English	Front. Cell Dev. Biol.	Article	All Open Access; Gold Open Access	Scopus	2-s2.0-85123998629
Xu H.; Lin C.; Yang J.; Chen X.; Chen Y.; Chen J.; Guo A.; Hu C.	Xu, Haojun (57224399189); Lin, Changjie (57217280969); Yang, Jinghan (57249380100); Chen, Xi (57190665308); Chen, Yingyu (36072083100); Chen, Jianguo (55864290700); Guo, Aizhen (57203317771); Hu, Changmin (7404569910)	57224399189; 57217280969; 57249380100; 57190665308; 36072083100; 55864290700; 57203317771; 7404569910	The Role of N6-Methyladenosine in Inflammatory Diseases	2022	Oxidative Medicine and Cellular Longevity	10.1155/2022/9744771	https://www.scopus.com/inward/record.uri?eid=2-s2.0-85144826312&doi=10.1155%2f2022%2f9744771&partnerID=40&md5=37aacbbc5a1c7daace022fd66d022dd4	Department of Clinical Veterinary Medicine, College of Veterinary Medicine, Huazhong Agricultural University, Wuhan, China; State Key Laboratory of Agricultural Microbiology, Huazhong Agricultural University, Wuhan, China; Department of Preventive Veterinary Medicine, College of Veterinary Medicine, Huazhong Agricultural University, Wuhan, China; Hubei Hongshan Laboratory, Huazhong Agricultural U…	N6-Methyladenosine (m6A) is the most abundant epigenetic RNA modification in eukaryotes, regulating RNA metabolism (export, stability, translation, and decay) in cells through changes in the activity of writers, erasers, and readers and ultimately affecting human life or disease processes. Inflammation is a response to infection and injury in various diseases and has therefore attracted significa…		Cells; Diseases; Life; Metabolism; Nucleic Acids; Stability; Translation; Adenosine; Epigenesis, Genetic; Humans; Neoplasms; RNA; Diagnosis; Diseases; Metabolism; Pathology; 6 n methyladenosine; adenosine; N-methyladenosine; RNA; Autoimmune disease; Cerebrovascular disease; Disease process; Epigenetics; Human disease; Human lives; Inflammatory disease; Life process; Metabolic disorders; RNA metab…	Zhang H., Shi X., Huang T., Zhao X., Chen W., Gu N., Zhang R., Dynamic landscape and evolution of m<sup>6</sup>A methylation in human, Nucleic Acids Research, 48, pp. 6251-6264, (2020); Noon K.R., Bruenger E., McCloskey J.A., Posttranscriptional modifications in 16S and 23S rRNAs of the archaeal hyperthermophile Sulfolobus solfataricus, Journal of Bacteriology, 180, pp. 2883-2888, (1998); Dominis…	A. Guo; State Key Laboratory of Agricultural Microbiology, Huazhong Agricultural University, Wuhan, China; email: aizhen@mail.hzau.edu.cn; C. Hu; Department of Clinical Veterinary Medicine, College of Veterinary Medicine, Huazhong Agricultural University, Wuhan, China; email: hcm@mail.hzau.edu.cn	Hindawi Limited	19420900		36578520	English	Oxidative Med. Cell. Longevity	Review	All Open Access; Gold Open Access; Green Open Access	Scopus	2-s2.0-85144826312
Li H.; Hu J.; Yu A.; Othmane B.; Guo T.; Liu J.; Cheng C.; Chen J.; Zu X.	Li, Huihuang (57201405228); Hu, Jiao (57203181565); Yu, Anze (57200168007); Othmane, Belaydi (57221807223); Guo, Tao (58359140700); Liu, Jinhui (57193916921); Cheng, Chunliang (57222626345); Chen, Jinbo (55969088000); Zu, Xiongbing (11439777900)	57201405228; 57203181565; 57200168007; 57221807223; 58359140700; 57193916921; 57222626345; 55969088000; 11439777900	RNA Modification of N6-Methyladenosine Predicts Immune Phenotypes and Therapeutic Opportunities in Kidney Renal Clear Cell Carcinoma	2021	Frontiers in Oncology	10.3389/fonc.2021.642159	https://www.scopus.com/inward/record.uri?eid=2-s2.0-85103502411&doi=10.3389%2ffonc.2021.642159&partnerID=40&md5=871b1536b542f9f8c01f53e30048fd45	Department of Urology, Xiangya Hospital, Central South University, Changsha, China; Immunobiology Transplant Science Center, Houston Methodist Research Institute, Texas Medical Center, Houston, TX, United States	RNA modification of N6-methyladenosine (m6A) plays critical roles in various biological processes, such as cancer development, inflammation, and the anticancer immune response. However, the role played by a comprehensive m6A modification pattern in regulating anticancer immunity in kidney renal clear cell carcinoma (KIRC) has not been fully elucidated. In this study, we identified two independent…	immune checkpoint blockade; immune phenotype; kidney renal clear cell carcinoma; N6-methyladenosine; tumor microenvironment	6 n methyladenosine; CD56 antigen; K ras protein; nivolumab; Article; cancer immunotherapy; cancer prognosis; cancer staging; CD4+ T lymphocyte; CD8+ T lymphocyte; clear cell carcinoma; clinical decision making; cohort analysis; cytotoxicity; dendritic cell; DNA replication; gene; gene cluster; gene control; gene expression; gene mutation; gene ontology; helper cell; human; immune response; immun…	Ljungberg B., Albiges L., Abu-Ghanem Y., Bensalah K., Dabestani S., Fernandez-Pello S., Et al., European association of urology guidelines on renal cell carcinoma: the 2019 update, Euro Urol, 75, pp. 799-810, (2019); McGregor B.A., McKay R.R., Braun D.A., Werner L., Gray K., Flaifel A., Et al., Results of a multicenter Phase II study of atezolizumab and bevacizumab for patients with metastatic re…	J. Chen; Department of Urology, Xiangya Hospital, Central South University, Changsha, China; email: chenjinbo1989@yahoo.com; X. Zu; Department of Urology, Xiangya Hospital, Central South University, Changsha, China; email: zuxbxyyy@126.com	Frontiers Media S.A.	2234943X			English	Front. Oncol.	Article	All Open Access; Gold Open Access; Green Open Access	Scopus	2-s2.0-85103502411
Li Q.; Yu L.; Gao A.; Ren R.; Zhang J.; Cao L.; Wang X.; Liu Y.; Qi W.; Cai L.; Li W.; Wang W.; Guo X.; Su G.; Yu X.; Zhang J.; Xi B.; Zhang Y.; Zhang M.; Zhang C.	Li, Qian (57216701809); Yu, Liwen (57216640165); Gao, Amy (58075090200); Ren, Ruiqing (58074826400); Zhang, Jianlin (57226751284); Cao, Lei (57216702026); Wang, Xiaohong (57216702428); Liu, Yapeng (57204933385); Qi, Wenqian (58074288900); Cai, Liangyu (58204071200); Li, Wei (58204086900); Wang, Weiwei (57226750739); Guo, Xiaobin (58204043500); Su, Guohai (15048865500); Yu, Xiao (7404115240); Zhan…	57216701809; 57216640165; 58075090200; 58074826400; 57226751284; 57216702026; 57216702428; 57204933385; 58074288900; 58204071200; 58204086900; 57226750739; 58204043500; 15048865500; 7404115240; 58748630300; 34874323200; 57216075661; 55505760000; 57215617103	METTL3 (Methyltransferase Like 3)-Dependent N6-Methyladenosine Modification on Braf mRNA Promotes Macrophage Inflammatory Response and Atherosclerosis in Mice	2023	Arteriosclerosis, Thrombosis, and Vascular Biology	10.1161/ATVBAHA.122.318451	https://www.scopus.com/inward/record.uri?eid=2-s2.0-85153989001&doi=10.1161%2fATVBAHA.122.318451&partnerID=40&md5=4c6f7cca452d47e66f82c690f9acef17	The Key Laboratory of Cardiovascular Remodeling and Function Research, Chinese Ministry of Education, Chinese National Health Commission and Chinese Academy of Medical Sciences, The State and Shandong Province Joint Key Laboratory of Translational Cardiovascular Medicine, Department of Cardiology, Qilu Hospital, Cheeloo College of Medicine, Shandong University, Jinan, Shandong, China; Cardiovascu…	Background: Atherosclerosis is a chronic inflammatory disease, in which macrophages determine the progression of atherosclerotic plaques. However, no studies have investigated how METTL3 (methyltransferase like 3) in macrophages affects atherosclerotic plaque formation in vivo. Additionally, whether Braf mRNA is modified by METTL3-dependent N6-methyladenosine (m6A) methylation remains unknown. Me…	atherosclerosis; ERK phosphorylation; inflammation; macrophage; methylation	Animals; Apolipoproteins E; Atherosclerosis; Inflammation; Macrophages; Methyltransferases; Mice; Plaque, Atherosclerotic; Proto-Oncogene Proteins B-raf; RNA, Messenger; 6 n methyladenosine; adenine; B Raf kinase; messenger RNA; methyltransferase; methyltransferase like 3; mitogen activated protein kinase 1; oxidized low density lipoprotein; stress activated protein kinase; unclassified drug; apo…	Roth G.A., Mensah G.A., Johnson C.O., Addolorato G., Ammirati E., Baddour L.M., Barengo N.C., Beaton A.Z., Benjamin E.J., Benziger C.P., Global burden of cardiovascular diseases and risk factors, 1990-2019: Update from the GBD 2019 study, J Am Coll Cardiol, 76, pp. 2982-3021, (2020); Libby P., Hansson G.K., From focal lipid storage to systemic inflammation: JACC review topic of the week, J Am Col…	M. Zhang; Department of Cardiology, Qilu Hospital of Shandong University, Shandong, Jinan, 250012, China; email: zhangmeng@sdu.edu.cn; C. Zhang; Department of Cardiology, Qilu Hospital of Shandong University, Shandong, Jinan, 250012, China; email: zhangc@sdu.edu.cn	Lippincott Williams and Wilkins	10795642	ATVBF	36951060	English	Arterioscler. Thromb. Vasc. Biol.	Article	All Open Access; Bronze Open Access	Scopus	2-s2.0-85153989001
Zhao Y.; Shi Y.; Shen H.; Xie W.	Zhao, Yanchun (57210846474); Shi, Yuanfei (57200880810); Shen, Huafei (57212311324); Xie, Wanzhuo (7401940703)	57210846474; 57200880810; 57212311324; 7401940703	M6A-binding proteins: The emerging crucial performers in epigenetics	2020	Journal of Hematology and Oncology	10.1186/s13045-020-00872-8	https://www.scopus.com/inward/record.uri?eid=2-s2.0-85083205702&doi=10.1186%2fs13045-020-00872-8&partnerID=40&md5=10bd5de11c5e4d2adcc256c3f41927b7	Department of Hematology, First Affiliated Hospital of Medical School of Zhejiang University, No. 79 Qingchun Road, Hangzhou, Zhejiang, 310003, China	N6-methyladenosine (m6A) is a well-known post-transcriptional modification that is the most common type of methylation in eukaryotic mRNAs. The regulation of m6A is dynamic and reversible, which is erected by m6A methyltransferases ("writers") and removed by m6A demethylases ("erasers"). Notably, the effects on targeted mRNAs resulted by m6A predominantly depend on the functions of different m6A-…	Adipogenesis; Cancer; Immunity; m<sup>6</sup>A-binding proteins; N<sup>6</sup>-methyladenosine; Virus	Adenosine; Animals; Epigenesis, Genetic; Hematopoiesis; Humans; Neoplasms; Protein Binding; Proteins; RNA Processing, Post-Transcriptional; RNA, Messenger; Virus Diseases; Virus Physiological Phenomena; Viruses; 6 n methyladenosine; 6 n methyladenosine binding protein; 6 n methyladenosine demethylase; 6 n methyladenosine methyltransferase; heterogeneous nuclear ribonucleoprotein; heterogeneous nu…	Bird A., Perceptions of epigenetics, Nature., 447, 7143, pp. 396-398, (2007); Desrosiers R., Friderici K., Rottman F., Identification of methylated nucleosides in messenger RNA from Novikoff hepatoma cells, Proc Natl Acad Sci USA., 71, 10, pp. 3971-3975, (1974); Perry R.P., Kelley D.E., Existence of methylated messenger RNA in mouse L cells, Cell., 1, 1, pp. 37-42, (1974); Wei C.M., Gershowitz A.…	W. Xie; Department of Hematology, First Affiliated Hospital of Medical School of Zhejiang University, Hangzhou, Zhejiang, No. 79 Qingchun Road, 310003, China; email: xiewanzhuo@zju.edu.cn	BioMed Central Ltd.	17568722		32276589	English	J. Hematol. Oncol.	Review	All Open Access; Gold Open Access	Scopus	2-s2.0-85083205702
Shen H.; Xie K.; Li M.; Yang Q.; Wang X.	Shen, Hao (57738769500); Xie, Keliang (35792898500); Li, Miaomiao (58742676800); Yang, Qianyu (57803686600); Wang, Xiaoye (57828998600)	57738769500; 35792898500; 58742676800; 57803686600; 57828998600	N6-methyladenosine (m6A) methyltransferase METTL3 regulates sepsis-induced myocardial injury through IGF2BP1/HDAC4 dependent manner	2022	Cell Death Discovery	10.1038/s41420-022-01099-x	https://www.scopus.com/inward/record.uri?eid=2-s2.0-85134253314&doi=10.1038%2fs41420-022-01099-x&partnerID=40&md5=33a74ff9d3094abb6e16ca472ebb6125	Department of Intensive Care Unit, Tianjin Medical University General Hospital, Tianjin, 300052, China; Department of Pediatric surgery, Tianjin Children’s Hospital, Tianjin, 300074, China	Recent studies have identified that N6-methyladenosine (m6A) extensively participates in the myocardial injury pathophysiological process. However, the role of m6A on sepsis-induced myocardial injury is still unclear. Here, we investigated the functions and mechanism of m6A methyltransferase METTL3 for septic myocardial injury. Results illustrated that the m6A modification level and METTL3 up-reg…			Agrawal L., Jain S., Madhusudhan K.S., Das P., Shalimar, Dash N.R., Et al., Sepsis Following Liver Biopsy in a Liver Transplant Recipient: Case Report and Review of Literature, J Clin Exp Hepatol, 11, pp. 254-259, (2021); Daniels N.F., Burrin C., Ridwan R., Severe Aplastic Anemia Presenting as Neutropenic Sepsis, J Med cases, 11, pp. 339-341, (2020); Fenner B.P., Darden D.B., Kelly L.S., Rincon J…	X. Wang; Department of Intensive Care Unit, Tianjin Medical University General Hospital, Tianjin, 300052, China; email: wangxiaoye2000doc@126.com	Springer Nature	20587716			English	Cell Death Discov.	Article	All Open Access; Gold Open Access; Green Open Access	Scopus	2-s2.0-85134253314
Wardowska A.	Wardowska, Anna (21735341800)	21735341800	M6a rna methylation in systemic autoimmune diseases—a new target for epigenetic-based therapy?	2021	Pharmaceuticals	10.3390/ph14030218	https://www.scopus.com/inward/record.uri?eid=2-s2.0-85103025559&doi=10.3390%2fph14030218&partnerID=40&md5=f3df10fc00c9cbd0844849813604f6f8	Department of Embryology, Medical University of Gdansk, Gdansk, 80-210, Poland	The general background of autoimmune diseases is a combination of genetic, epigenetic and environmental factors, that lead to defective immune reactions. This erroneous immune cell activation results in an excessive production of autoantibodies and prolonged inflammation. During recent years epigenetic mechanisms have been extensively studied as potential culprits of autoreactivity. Alike DNA and…	Autoimmune disease; Epidrugs; Epigenetic; M6A; N6-methyladenosine; RNA methylome	6 n methyladenosine; acy 738; azacitidine; ckd 506; decitabine; DNA methyltransferase inhibitor; histone deacetylase inhibitor; microRNA; RNA; trichostatin A; unclassified drug; vorinostat; autoimmune disease; drug mechanism; drug targeting; epigenetics; human; multiple sclerosis; nonhuman; nucleic acid analysis; pathogenesis; psoriasis; Review; rheumatoid arthritis; RNA methylation; systemic lup…	Finelli R., Leisegang K., Finocchi F., De Masi S., Agarwal A., Damiani G., The impact of autoimmune systemic inflammation and associated medications on male reproductive health in patients with chronic rheumatological, dermatological, and gastroenterological diseases: A systematic review, Am. J. Reprod. Immunol, (2021); Rosenblum M.D., Remedios K.A., Abbas A.K., Mechanisms of human autoimmunity, …	A. Wardowska; Department of Embryology, Medical University of Gdansk, Gdansk, 80-210, Poland; email: anna.wardowska@gumed.edu.pl	MDPI AG	14248247			English	Pharmaceuticals	Review	All Open Access; Gold Open Access; Green Open Access	Scopus	2-s2.0-85103025559
Fei L.; Sun G.; Sun J.; Wu D.	Fei, Liming (56293274400); Sun, Gengyun (7402760416); Sun, Juan (57219289480); Wu, Dong (57483016500)	56293274400; 7402760416; 57219289480; 57483016500	The effect of N6-methyladenosine (m6A) factors on the development of acute respiratory distress syndrome in the mouse model	2022	Bioengineered	10.1080/21655979.2022.2049473	https://www.scopus.com/inward/record.uri?eid=2-s2.0-85126075851&doi=10.1080%2f21655979.2022.2049473&partnerID=40&md5=b1193220d7ba804bc14e58488491739d	Department of Respiratory and Critical Care Medicine, The First Affiliated Hospital of Anhui Medical University, Anhui, Hefei, China	Acute respiratory distress syndrome (ARDS) can cause loss of alveolar-capillary membrane integrity and life-threatening immune responses. The underlying molecular mechanisms of ARDS remain unclear. N6-methyladenosine (m6A)-RNA modification plays an important part in many biological processes. However, it is not clear whether ARDS alters RNA methylation in lung tissue. We tried to investigate the …	Acute respiratory distress syndrome; inflammatory response; lung; m6A; RNA methylation	Adenosine; Animals; Lipopolysaccharides; Mice; Respiratory Distress Syndrome; RNA; RNA, Messenger; 6 n methyladenosine; alkb homolog 5 rna demethylase; chloroform; eukaryotic translation initiation factor 3 subunit a; fto alpha ketoglutarate dependent dioxygenase; lipopolysaccharide; methyltransferase 16; methyltransferase 3 n6 adenosine methyltransferase complex catalytic subunit; paraformaldehy…	Bellani G., Laffey J.G., Pham T., Et al., Epidemiology, Patterns of Care, and Mortality for Patients With Acute Respiratory Distress Syndrome in Intensive Care Units in 50 Countries, Jama, 315, 8, pp. 788-800, (2016); Vincent J.L., Sakr Y., Ranieri V.M., Epidemiology and outcome of acute respiratory failure in intensive care unit patients, Crit Care Med, 31, pp. S296-S299, (2003); Katzenstein A.L…	G. Sun; Department of Respiratory and Critical Care Medicine, The First Affiliated Hospital of Anhui Medical University, Hefei, No. 218, Jixi Road, Shushan District, Anhui, 230022, China; email: sungengy@126.com	Taylor and Francis Ltd.	21655979		35263199	English	Bioengineered	Article	All Open Access; Gold Open Access	Scopus	2-s2.0-85126075851
Feng Y.; Liu T.; Xu S.; Ren Y.; Ge Y.; Yin L.; Pu Y.; Liang G.	Feng, Yanlu (57302251600); Liu, Tong (57111059700); Xu, Siyi (57195773442); Ren, Yiyi (57302251500); Ge, Yiling (57302251400); Yin, Lihong (8090267900); Pu, Yuepu (57751592900); Liang, Geyu (8570555000)	57302251600; 57111059700; 57195773442; 57302251500; 57302251400; 8090267900; 57751592900; 8570555000	The role of N6-methyladenosine methylation in environmental exposure-induced health damage	2022	Environmental Science and Pollution Research	10.1007/s11356-022-22093-x	https://www.scopus.com/inward/record.uri?eid=2-s2.0-85136968442&doi=10.1007%2fs11356-022-22093-x&partnerID=40&md5=2a94172c531640b2925e7107da7c19ba	Key Laboratory of Environmental Medicine Engineering, Ministry of Education, School of Public Health, Southeast University, Jiangsu, Nanjing, 210009, China	The health risks caused by environmental pollution have long been of substantial concern. With the development of epigenetics, a large number of studies have demonstrated that N6-methyladenosine (m6A) modification is involved in the regulation of various important life activities associated with various diseases. Recent studies have revealed that m6A plays a key role in health damage caused by en…	Biological function; Biomarker; Environmental pollutants; FTO; Health damage; m6A; METTL3	Adenosine; Environmental Exposure; Environmental Health; Environmental Pollutants; Methylation; Methyltransferases; Particulate Matter; Reactive Oxygen Species; adenosine; methyltransferase; N-methyladenosine; reactive oxygen metabolite; biomarker; gene expression; heavy metal; induced response; methylation; particulate matter; public health; reactive oxygen species; environmental exposure; envir…	Alarcon C.R., Goodarzi H., Lee H., Liu X., Tavazoie S., Tavazoie S.F., HNRNPA2B1 is a mediator of m(6)A-dependent nuclear RNA processing events, Cell, 162, pp. 1299-1308, (2015); Alarcon C.R., Lee H., Goodarzi H., Halberg N., Tavazoie S.F., N6-methyladenosine marks primary microRNAs for processing, Nature, 519, pp. 482-485, (2015); Aluru N., Karchner S.I., PCB126 exposure revealed alterations in …	G. Liang; Key Laboratory of Environmental Medicine Engineering, Ministry of Education, School of Public Health, Southeast University, Nanjing, Jiangsu, 210009, China; email: lianggeyu@163.com	Springer Science and Business Media Deutschland GmbH	9441344	ESPLE	35951238	English	Environ. Sci. Pollut. Res.	Review		Scopus	2-s2.0-85136968442
Li X.; Ma B.; Zhang W.; Song Z.; Zhang X.; Liao M.; Li X.; Zhao X.; Du M.; Yu J.; He S.; Yan H.	Li, Xiaohua (37109249000); Ma, Binyun (55364000000); Zhang, Wenfang (23101877700); Song, Zongming (14833216800); Zhang, Xiaodan (57774597200); Liao, Mengyu (57102601500); Li, Xue (57218467297); Zhao, Xueru (57771011200); Du, Mei (36469890100); Yu, Jinguo (23053345200); He, Shikun (56576894700); Yan, Hua (35276682300)	37109249000; 55364000000; 23101877700; 14833216800; 57774597200; 57102601500; 57218467297; 57771011200; 36469890100; 23053345200; 56576894700; 35276682300	The essential role of N6-methyladenosine RNA methylation in complex eye diseases	2023	Genes and Diseases	10.1016/j.gendis.2022.05.008	https://www.scopus.com/inward/record.uri?eid=2-s2.0-85133275694&doi=10.1016%2fj.gendis.2022.05.008&partnerID=40&md5=e74f3ed75cdb5c5fc75fd460a9006e29	Henan Provincial People's Hospital, Henan Eye Hospital, Henan Eye Institute, Henan Key Laboratory of Ophthalmology and Visual Science, People's Hospital of Zhengzhou University, People's Hospital of Henan University, Henan, Zhengzhou, 450003, China; Department of Medicine/Hematology, Keck School of Medicine of the University of Southern California, Los Angeles, 90033, CA, United States; Departmen…	There are many complex eye diseases which are the leading causes of blindness, however, the pathogenesis of the complex eye diseases is not fully understood, especially the underlying molecular mechanisms of N6-methyladenosine (m6A) RNA methylation in the eye diseases have not been extensive clarified. Our review summarizes the latest advances in the studies of m6A modification in the pathogenesi…	Degeneration; Eye diseases; Fibrosis; Inflammation; m6A RNA methylation; Tumor	6 n methyladenosine; age related macular degeneration; cataract; cornea disease; cornea neovascularization; diabetic retinopathy; eye disease; Graves disease; human; keratomycosis; molecular pathology; nonhuman; optic nerve disease; retinoblastoma; Review; RNA methylation; uvea melanoma; vitreoretinopathy	Saletore Y., Meyer K., Korlach J., Et al., The birth of the Epitranscriptome: deciphering the function of RNA modifications, Genome Biol, 13, 10, (2012); Meyer K.D., Jaffrey S.R., The dynamic epitranscriptome: N6-methyladenosine and gene expression control, Nat Rev Mol Cell Biol, 15, 5, pp. 313-326, (2014); Meyer K.D., Saletore Y., Zumbo P., Et al., Comprehensive analysis of mRNA methylation reve…	H. Yan; Department of Ophthalmology, Tianjin Medical University General Hospital, Tianjin, 300052, China; email: zyyyanhua@tmu.edu.cn; X. Li; Henan Provincial People's Hospital, Henan Eye Hospital, Henan Eye Institute, Henan Key Laboratory of Ophthalmology and Visual Science, People's Hospital of Zhengzhou University, People's Hospital of Henan University, Zhengzhou, Henan, 450003, China; email: …	KeAi Communications Co.	23524820			English	Genes Dis.	Review	All Open Access; Gold Open Access; Green Open Access	Scopus	2-s2.0-85133275694
Xiao K.; Liu P.; Yan P.; Liu Y.; Song L.; Liu Y.; Xie L.	Xiao, Kun (55308785400); Liu, Pengfei (55607266000); Yan, Peng (57206697898); Liu, Yanxin (58872314000); Song, Licheng (57203852145); Liu, Yuhong (57219407652); Xie, Lixin (59061989200)	55308785400; 55607266000; 57206697898; 58872314000; 57203852145; 57219407652; 59061989200	N6-methyladenosine reader YTH N6-methyladenosine RNA binding protein 3 or insulin like growth factor 2 mRNA binding protein 2 knockdown protects human bronchial epithelial cells from hypoxia/reoxygenation injury by inactivating p38 MAPK, AKT, ERK1/2, and NF-κB pathways	2022	Bioengineered	10.1080/21655979.2021.1999550	https://www.scopus.com/inward/record.uri?eid=2-s2.0-85125410575&doi=10.1080%2f21655979.2021.1999550&partnerID=40&md5=405d6bd72888dbbb86d482b335c58bbf	Medical School of Chinese People’s Liberation Army (Pla), Beijing, China	Lung ischemia/reperfusion (I/R) injury (LIRI) is a common complication after lung transplantation, embolism, and trauma. N6-methyladenosine (m6A) methylation modification is implicated in the pathogenesis of I/R injury. However, there are no or few reports of m6A-related regulators in LIRI till now. In this text, dysregulated genes in lung tissues of LIRI rats versus the sham group were identifie…	hypoxia; IGF2BP2; injury; lung; N6-methyladenosine; reoxygenation; YTHDF3	Adenosine; Animals; Cell Proliferation; Epithelial Cells; Humans; Hypoxia; MAP Kinase Signaling System; NF-kappa B; p38 Mitogen-Activated Protein Kinases; Proto-Oncogene Proteins c-akt; Rats; RNA, Messenger; RNA-Binding Proteins; Somatomedins; 6 n methyladenosine; cytokine; interleukin 1beta; methyltransferase; mitogen activated protein kinase 1; mitogen activated protein kinase 3; mitogen activa…	Den Hengst W.A., Gielis J.F., Lin J.Y., Et al., Lung ischemia-reperfusion injury: a molecular and clinical view on a complex pathophysiological process, Am J Physiol-Heart C, 299, 5, pp. H1283-H1299, (2010); Weyker P.D., Webb C.A., Kiamanesh D., Et al., Lung ischemia reperfusion injury: a bench-to-bedside review, Semin Cardiothorac Vasc Anesth, 17, 1, pp. 28-43, (2013); Laubach V.E., Sharma A.K.,…	L. Xie; college of Pulmonary Critical Care Medicine, Chinese People’s Liberation Army (Pla) General Hospital, Beijing, No.28 Fuxing Road, Haidian District, China; email: lixin4325@163.com	Taylor and Francis Ltd.	21655979		34709120	English	Bioengineered	Article	All Open Access; Gold Open Access	Scopus	2-s2.0-85125410575
Luo J.; Xu T.; Sun K.	Luo, Jiahui (57210556918); Xu, Tao (57220966725); Sun, Kai (57233028100)	57210556918; 57220966725; 57233028100	N6-Methyladenosine RNA Modification in Inflammation: Roles, Mechanisms, and Applications	2021	Frontiers in Cell and Developmental Biology	10.3389/fcell.2021.670711	https://www.scopus.com/inward/record.uri?eid=2-s2.0-85108140779&doi=10.3389%2ffcell.2021.670711&partnerID=40&md5=5eecd8e171b189a9fa53be42a30367f4	The Center for Biomedical Research, Tongji Hospital, Tongji Medical College, Huazhong University of Science and Technology, Wuhan, China; Department of Rehabilitation, Tongji Hospital, Tongji Medical College, Huazhong University of Science and Technology, Wuhan, China; Department of Orthopedics, Tongji Hospital, Tongji Medical College, Huazhong University of Science and Technology, Wuhan, China	N6-methyladenosine (m6A) is the most prevalent internal mRNA modification. m6A can be installed by the methyltransferase complex and removed by demethylases, which are involved in regulating post-transcriptional expression of target genes. RNA methylation is linked to various inflammatory states, including autoimmunity, infection, metabolic disease, cancer, neurodegenerative diseases, heart disea…	epigenetics; inflammation; inflammatory disease; N6-methyladenosine; RNA modification	6 n methyladenosine; ademetionine; long untranslated RNA; small nuclear RNA; alternative RNA splicing; bone disease; consensus sequence; degenerative disease; disease exacerbation; gene expression; heart disease; human; inflammation; malignant neoplasm; metabolic disorder; Review; RNA degradation; RNA methylation; RNA splicing; RNA translation; stop codon; translation initiation	Agus A., Planchais J., Sokol H., Gut Microbiota Regulation of Tryptophan Metabolism in Health and Disease, Cell Host Microbe, 23, pp. 716-724, (2018); Alarcon Claudio R., Goodarzi H., Lee H., Liu X., Tavazoie S., Tavazoie Sohail F., HNRNPA2B1 Is a Mediator of m6A-Dependent Nuclear RNA Processing Events, Cell, 162, pp. 1299-1308, (2015); Barbieri I., Tzelepis K., Pandolfini L., Shi J., Millan-Zamb…	T. Xu; Department of Rehabilitation, Tongji Hospital, Tongji Medical College, Huazhong University of Science and Technology, Wuhan, China; email: xutao0101@yeah.net; K. Sun; Department of Orthopedics, Tongji Hospital, Tongji Medical College, Huazhong University of Science and Technology, Wuhan, China; email: 1085844308@qq.com	Frontiers Media S.A.	2296634X			English	Front. Cell Dev. Biol.	Review	All Open Access; Gold Open Access; Green Open Access	Scopus	2-s2.0-85108140779
Wang K.; Kan Q.; Ye Y.; Qiu J.; Huang L.; Wu R.; Yao C.	Wang, Kangjie (57209236358); Kan, Qinghui (57221329373); Ye, Yanchen (57209234720); Qiu, Jiachong (57217351111); Huang, Lin (58835342800); Wu, Ridong (55756875800); Yao, Chen (35294286300)	57209236358; 57221329373; 57209234720; 57217351111; 58835342800; 55756875800; 35294286300	Novel insight of N6-methyladenosine modified subtypes in abdominal aortic aneurysm	2022	Frontiers in Genetics	10.3389/fgene.2022.1055396	https://www.scopus.com/inward/record.uri?eid=2-s2.0-85143374401&doi=10.3389%2ffgene.2022.1055396&partnerID=40&md5=27b2b2a6e98949a99937f88d6ae89f2b	Division of Vascular Surgery, The First Affiliated Hospital, Sun Yat-Sen University, Guangzhou, China; National-Guangdong Joint Engineering Laboratory for Diagnosis, Treatment of Vascular Disease, First Affiliated Hospital, Sun Yat-Sen University, Guangzhou, China; Department of Vascular Surgery, The Second Affiliated Hospital of Nanchang University, Nanchang, China	Background: N6-methyladenosine (m6A) is the most prevalent non-cap reversible modification present in messenger RNAs and long non-coding RNAs, and its dysregulation has been linked to multiple cardiovascular diseases, including cardiac hypertrophy and atherosclerosis. Although limited studies have suggested that m6A modification contributes to abdominal aortic aneurysm (AAA) development, the full…	abdominal aortic aneurysm; immune infiltration; m6Asore; methylation; N<sup>6</sup>-methyladenosine	6 n methyladenosine; transcriptome; abdominal aortic aneurysm; antigen presenting cell; Article; bioinformatics; body mass; burnout; carcinogenesis; CD4+ T lymphocyte; CD8+ T lymphocyte; cell differentiation; cell infiltration; differential gene expression; extracellular matrix; gene expression; gene ontology; human; human tissue; immunocompetent cell; immunofluorescence; immunohistochemistry; in…	Akkoyun E., Gharahi H., Kwon S.T., Zambrano B.A., Rao A., Acar A.C., Et al., Defining a master curve of abdominal aortic aneurysm growth and its potential utility of clinical management, Comput. Methods Programs Biomed, 208, (2021); Boccaletto P., Machnicka M.A., Purta E., Piatkowski P., Baginski B., Wirecki T.K., Et al., Modomics: A database of RNA modification pathways. 2017 update, Nucleic Aci…	C. Yao; Division of Vascular Surgery, The First Affiliated Hospital, Sun Yat-Sen University, Guangzhou, China; email: yaochen@mail.sysu.edu.cn	Frontiers Media S.A.	16648021			English	Front. Genet.	Article	All Open Access; Gold Open Access	Scopus	2-s2.0-85143374401
Tan Q.; He S.; Leng X.; Zheng D.; Mao F.; Hao J.; Chen K.; Jiang H.; Lin Y.; Yang J.	Tan, Quandan (57959886900); He, Song (57959003900); Leng, Xinyi (55486746100); Zheng, Danni (56058904200); Mao, Fengkai (57960098600); Hao, Junli (55235335600); Chen, Kejie (55630698900); Jiang, Haisong (55492211000); Lin, Yapeng (57205560735); Yang, Jie (57221831280)	57959886900; 57959003900; 55486746100; 56058904200; 57960098600; 55235335600; 55630698900; 55492211000; 57205560735; 57221831280	The Mechanism and Role of N6-Methyladenosine (m6A) Modification in Atherosclerosis and Atherosclerotic Diseases	2022	Journal of Cardiovascular Development and Disease	10.3390/jcdd9110367	https://www.scopus.com/inward/record.uri?eid=2-s2.0-85141650088&doi=10.3390%2fjcdd9110367&partnerID=40&md5=38c32cc39add09dc310b7955d92e52ab	Department of Neurology, The First Affiliated Hospital of Chengdu Medical College, Chengdu, 610072, China; Department of Medicine & Therapeutics, The Chinese University of Hong Kong, 999077, Hong Kong; Biomedical Informatics and Digital Health, School of Medical Sciences, University of Sydney, Sydney, 2050, NSW, Australia; School of Biomedical Sciences and Technology, Chengdu Medical College, Che…	N6-methyladenosine (m6A) modification is a newly discovered regulatory mechanism in eukaryotes. As one of the most common epigenetic mechanisms, m6A’s role in the development of atherosclerosis (AS) and atherosclerotic diseases (AD) has also received increasing attention. Herein, we elucidate the effect of m6A on major risk factors for AS, including lipid metabolism disorders, hypertension, and h…	atherosclerosis; atherosclerotic diseases; diagnostic biomarkers; N<sup>6</sup>-methyladenosine (m<sup>6</sup>A); targeted therapeutics	6 n methyladenosine; biological marker; methyltransferase; atherogenesis; atherosclerosis; cardiometabolic risk factor; cell damage; disorders of lipid metabolism; DNA methylation; dyslipidemia; endothelial dysfunction; endothelium cell; human; hyperglycemia; hypertension; inflammation; ischemic cardiomyopathy; ischemic heart disease; ischemic stroke; lipid metabolism; macrophage; non insulin dep…	Rohde L.E., Lee R.T., Pathophysiology of Atherosclerotic Plaque Development and Rupture: An Overview, Semin. Vasc. Med, 3, pp. 347-354, (2003); Chen L., Zheng J., Xue Q., Zhao Y., YKL-40 promotes the progress of atherosclerosis independent of lipid metabolism in apolipoprotein E<sup>−/−</sup> mice fed a high-fat diet, Heart Vessel, 34, pp. 1874-1881, (2019); Bjorkegren J.L.M., Lusis A.J., Atheros…	Y. Lin; Department of Neurology, The First Affiliated Hospital of Chengdu Medical College, Chengdu, 610072, China; email: linyapengsjnk@163.com; J. Yang; Department of Neurology, Sichuan Provincial People’s Hospital, University of Electronic Science and Technology of China, Chengdu, 610072, China; email: yangjie1126@163.com	MDPI	23083425			English	J. Cardiovasc. Dev. Dis.	Review	All Open Access; Gold Open Access; Green Open Access	Scopus	2-s2.0-85141650088
Chen Y.; Wu Y.; Zhu L.; Chen C.; Xu S.; Tang D.; Jiao Y.; Yu W.	Chen, Yi (57211190238); Wu, Yuling (57222814885); Zhu, Linjie (57205404902); Chen, Caiyang (55785788800); Xu, Saihong (57204515361); Tang, Dan (57204679782); Jiao, Yingfu (57203091451); Yu, Weifeng (34972474800)	57211190238; 57222814885; 57205404902; 55785788800; 57204515361; 57204679782; 57203091451; 34972474800	METTL3-Mediated N6-Methyladenosine Modification of Trim59 mRNA Protects Against Sepsis-Induced Acute Respiratory Distress Syndrome	2022	Frontiers in Immunology	10.3389/fimmu.2022.897487	https://www.scopus.com/inward/record.uri?eid=2-s2.0-85131851696&doi=10.3389%2ffimmu.2022.897487&partnerID=40&md5=306cf837eb144519da9867fcab94fbb2	Department of Anesthesiology, Renji Hospital, Jiaotong University School of Medicine, Shanghai, China; The Cancer Hospital, University of Chinese Academy of Sciences (Zhejiang Cancer Hospital), Institute of Basic Medicine and Cancer (IBMC), Chinese Academy of Sciences, Hangzhou, China	N6-methyladenosine (m6A) RNA modification is a fundamental determinant of mRNA metabolism in eukaryotic cells and is involved in numerous physiological and pathological processes. However, the specific role of m6A modification in sepsis-induced acute respiratory distress syndrome(ARDS) remains unknown. Here, we show that the levels of m6A RNA were significantly decreased in septic lungs and that …	acute lung injury; endothelial barrier; epigenetic regulation; m<sup>6</sup>A; METTL3; sepsis	6 n methyladenosine; immunoglobulin enhancer binding protein; adult respiratory distress syndrome; animal cell; animal experiment; animal model; animal tissue; Article; blood sampling; chemoluminescence; controlled study; enzyme linked immunosorbent assay; immunohistochemistry; laparotomy; lung injury; lung parenchyma; male; mouse; mRNA expression level; neutrophil chemotaxis; nonhuman; protein e…	Singer M., Deutschman C.S., Seymour C.W., Shankar-Hari M., Annane D., Bauer M., Et al., The Third International Consensus Definitions for Sepsis and Septic Shock (Sepsis-3), Jama-J Am Med Assoc, 315, 8, (2016); Matthay M.A., Zemans R.L., Zimmerman G.A., Arabi Y.M., Beitler J.R., Mercat A., Et al., Acute Respiratory Distress Syndrome, Nat Rev Dis Primers, 5, (2019); Spinelli E., Mauri T., Beitler …	Y. Jiao; Department of Anesthesiology, Renji Hospital, Jiaotong University School of Medicine, Shanghai, China; email: yingfujiao@yeah.net; W. Yu; Department of Anesthesiology, Renji Hospital, Jiaotong University School of Medicine, Shanghai, China; email: ywf808@yeah.net	Frontiers Media S.A.	16643224		35693774	English	Front. Immunol.	Article	All Open Access; Gold Open Access; Green Open Access	Scopus	2-s2.0-85131851696
Li D.; Zhu X.; Li Y.; Zeng X.	Li, Dong (57196038466); Zhu, Xiaohua (57203910067); Li, Yunxiang (56517022000); Zeng, Xianyin (7403247886)	57196038466; 57203910067; 56517022000; 7403247886	Novel insights into the roles of RNA N6-methyladenosine modification in regulating gene expression during environmental exposures	2020	Chemosphere	10.1016/j.chemosphere.2020.127757	https://www.scopus.com/inward/record.uri?eid=2-s2.0-85088631632&doi=10.1016%2fj.chemosphere.2020.127757&partnerID=40&md5=afc45c4928126cdf7c477dd034cfbab0	College of Life Science, Sichuan Agricultural University, Ya'an, 625014, Sichuan, China; College of Environmental Science and Engineering, China West Normal University, Nanchong, 637009, Sichuan, China	N6-methyladenosine (m6A) is one of the most common RNA modifications in eukaryotes involved in the regulation of post-transcriptional gene expression, as well as the occurrence and development of diseases related to environmental exposures. Adverse factors produced by environmental exposures, such as reactive oxygen species, inflammation, and cyclobutane pyrimidine dimers, mediate m6A modificatio…	Disease; Environmental exposure; Gene expression; N<sup>6</sup>-methyladenosine	Adenosine; Environmental Exposure; Environmental Pollution; Eukaryotic Cells; Gene Expression Regulation; Humans; Methylation; RNA; RNA Processing, Post-Transcriptional; Signal Transduction; Eukaryota; Alkylation; Dimers; Environmental regulations; Methylation; RNA; 6 n methyladenosine; carbon; cigarette smoke; circular ribonucleic acid; environmental chemical; long untranslated RNA; messenger RN…	Alarcon C.R., Et al., HNRNPA2B1 is a mediator of m(6)a-dependent nuclear RNA processing events, Cell, 162, pp. 1299-1308, (2015); Alarcon C.R., Et al., N6-methyladenosine marks primary microRNAs for processing, Nature, 519, pp. 482-485, (2015); Angrish M.M., Et al., Epigenetic applications in adverse outcome pathways and environmental risk evaluation, Environ. Health Perspect., 126, (2018); Argue…	X. Zeng; Ya'an, No.46, Xinkang Road, Yucheng District, China; email: xyzeng1966@163.com	Elsevier Ltd	456535	CMSHA	32726721	English	Chemosphere	Review		Scopus	2-s2.0-85088631632
Zhao J.; Han D.-X.; Wang C.-B.; Wang X.-L.	Zhao, Jun (57212211559); Han, Dun-Xin (57218419534); Wang, Chun-Bo (57218419941); Wang, Xi-Lin (57218421973)	57212211559; 57218419534; 57218419941; 57218421973	Zbtb7b suppresses aseptic inflammation by regulating m6A modification of IL6 mRNA	2020	Biochemical and Biophysical Research Communications	10.1016/j.bbrc.2020.07.011	https://www.scopus.com/inward/record.uri?eid=2-s2.0-85089150211&doi=10.1016%2fj.bbrc.2020.07.011&partnerID=40&md5=95c1dede6b4f5c8d16c0f322e0805de1	Department of Respiration, Zhejiang Medical & Health Group Hangzhou Hospital, 1 Banshan Road, Hangzhou, 310022, Zhejiang, China; Weihai Branch of 970 Hospital of the PLA Joint Logistic Support Force, 8 Baoquan Road, Weihai, 264200, Shandong, China; Department of Oncology, 970 Hospital of the PLA Joint Logistic Support Force, 7 Zhichunan Road, Yantai, 264002, Shandong, China	Radiotherapy is a crucial approach for treating tumors. However, radiation-induced aseptic inflammation is a common complication. Radiation pneumonitis is the acute manifestation of radiation-induced lung disease, and interleukin 6 (IL-6) is a major proinflammatory cytokine involved in radiation-induced lung injury. Here we found that silencing Zinc finger and BTB domain-containing protein 7B (Zb…	ALKBH5; Interleukin 6; N<sup>6</sup>-methyladenosine; Radiation pneumonitis	Adenosine; Cell Line; DNA-Binding Proteins; Epigenesis, Genetic; Epithelial Cells; Gene Silencing; HEK293 Cells; Humans; Inflammation; Interleukin-6; RNA, Messenger; Transcription Factors; 6 n methyladenosine; alkylated DNA repair protein alkB homolog 5; alpha ketoglutarate dependent dioxygenase FTO; interleukin 6; messenger RNA; nuclear RNA; small interfering RNA; tumor necrosis factor; unclassi…	Chen G.Y., Nunez G., Sterile inflammation: sensing and reacting to damage, Nat. Rev. Immunol., 10, pp. 826-837, (2010); Zindel J., Kubes P., DAMPs, PAMPs, and LAMPs in immunity and sterile inflammation, Annu. Rev. Pathol., 15, pp. 493-518, (2020); Bledsoe T.J., Nath S.K., Decker R.H., Radiation pneumonitis, Clin. Chest Med., 38, pp. 201-208, (2017); Wildt K.F., Sun G., Grueter B., Fischer M., Zam…	J. Zhao; Department of Respiration, Zhejiang Medical & Health Group Hangzhou Hospital, Hangzhou, 1 Banshan Road, 310022, China; email: zhaojun_hangzhou@sina.com; X.-L. Wang; Department of Oncology, 970 Hospital of the PLA Joint Logistic Support Force, Yantai, 7 Zhichunan Road, 264002, China; email: wxl2639266@163.com	Elsevier B.V.	0006291X	BBRCA	32828308	English	Biochem. Biophys. Res. Commun.	Article		Scopus	2-s2.0-85089150211
Li L.; Xu N.; Liu J.; Chen Z.; Liu X.; Wang J.	Li, Longbo (57191973766); Xu, Nannan (55871248600); Liu, Jia (57218348696); Chen, Zhenzhen (57771164900); Liu, Xu (57802718900); Wang, Junnan (55602044500)	57191973766; 55871248600; 57218348696; 57771164900; 57802718900; 55602044500	m6A Methylation in Cardiovascular Diseases: From Mechanisms to Therapeutic Potential	2022	Frontiers in Genetics	10.3389/fgene.2022.908976	https://www.scopus.com/inward/record.uri?eid=2-s2.0-85134170860&doi=10.3389%2ffgene.2022.908976&partnerID=40&md5=3decaad23d58cdfa13a902aa8ac2c137	Department of Cardiology, Second Hospital of Jilin University, Changchun, China	Cardiovascular disease (CVD) is a leading cause of morbidity and mortality worldwide. Recent studies have shown that n6-methyladenosine (m6A) plays a major role in cardiovascular homeostasis and pathophysiology. These studies have confirmed that m6A methylation affects the pathophysiology of cardiovascular diseases by regulating cellular processes such as differentiation, proliferation, inflammat…	cardiovascular diseases; cardiovascular pathophysiology; epigenetics; m6A; m6A demethylase; m6A methyltransferase	6 n methyladenosine; methyltransferase; n demethylase; RNA binding protein; untranslated RNA; aging; alternative RNA splicing; aortic aneurysm; aortic dissection; apoptosis; atherosclerosis; autophagy (cellular); cardiomyopathy; cardiovascular disease; cardiovascular risk factor; cell differentiation; cell function; cell proliferation; congenital heart disease; diabetes mellitus; disease exacerba…	Alarcon C.R., Goodarzi H., Lee H., Liu X., Tavazoie S., Tavazoie S.F., HNRNPA2B1 Is a Mediator of m6A-dependent Nuclear RNA Processing Events, Cell, 162, pp. 1299-1308, (2015); Alarcon C.R., Lee H., Goodarzi H., Halberg N., Tavazoie S.F., N6-methyladenosine Marks Primary microRNAs for Processing, Nature, 519, pp. 482-485, (2015); Andersson C., Vasan R.S., Epidemiology of Cardiovascular Disease in…	J. Wang; Department of Cardiology, Second Hospital of Jilin University, Changchun, China; email: jdeywjn@163.com	Frontiers Media S.A.	16648021			English	Front. Genet.	Review	All Open Access; Gold Open Access; Green Open Access	Scopus	2-s2.0-85134170860
Fan Y.; Lv X.; Chen Z.; Peng Y.; Zhang M.	Fan, Yishu (57211769154); Lv, Xinyi (57211767823); Chen, Zhuohui (57208343432); Peng, Yanyi (58134210100); Zhang, Mengqi (56083517300)	57211769154; 57211767823; 57208343432; 58134210100; 56083517300	m6A methylation: Critical roles in aging and neurological diseases	2023	Frontiers in Molecular Neuroscience	10.3389/fnmol.2023.1102147	https://www.scopus.com/inward/record.uri?eid=2-s2.0-85149641602&doi=10.3389%2ffnmol.2023.1102147&partnerID=40&md5=79a98dcd7c28ba68b0988c86056c6244	Department of Neurology, Xiangya Hospital, Central South University, Changsha, China; National Clinical Research Center for Geriatric Disorders, Xiangya Hospital, Central South University, Hunan, Changsha, China; Hunan Key Laboratory of Medical Epigenomics, Department of Dermatology, The Second Xiangya Hospital of Central South University, Changsha, China	N6-methyladenosine (m6A) is the most abundant internal RNA modification in eukaryotic cells, which participates in the functional regulation of various biological processes. It regulates the expression of targeted genes by affecting RNA translocation, alternative splicing, maturation, stability, and degradation. As recent evidence shows, of all organs, brain has the highest abundance of m6A methy…	6-methyladenosine; CNS diseases; m6A; neurovascular unit; RNA methylation	6 n methyladenosine; long untranslated RNA; matrix metalloproteinase; microRNA; microRNA 200; saponin; transfer RNA; transforming growth factor beta; tumor necrosis factor; vasculotropin; aging; alternative RNA splicing; angiogenesis; apoptosis; astrocyte; bioavailability; blood brain barrier; cell differentiation; cell migration; cell proliferation; central nervous system; cerebrovascular diseas…	Aas A., Isakson P., Bindesboll C., Alemu E.A., Klungland A., Simonsen A., Nucleocytoplasmic shuttling of FTO does not affect starvation-induced autophagy, PLoS One, 12, (2017); Adhikari S., Xiao W., Zhao Y.L., Yang Y.G., M(6)a: signaling for mRNA splicing, RNA Biol, 13, pp. 756-759, (2016); Alarcon C.R., Goodarzi H., Lee H., Liu X., Tavazoie S., Tavazoie S.F., HNRNPA2B1 is a mediator of m6A-depen…	M. Zhang; Department of Neurology, Xiangya Hospital, Central South University, Changsha, China; email: zhangmengqi8912@163.com	Frontiers Media S.A.	16625099			English	Front. Mol. Neurosci.	Review	All Open Access; Gold Open Access; Green Open Access	Scopus	2-s2.0-85149641602
Li Q.; Wen S.; Ye W.; Zhao S.; Liu X.	Li, Qi (57226187718); Wen, Shaohong (56996647200); Ye, Weizhen (57226196969); Zhao, Shunying (57202389803); Liu, Xiangrong (35746565700)	57226187718; 56996647200; 57226196969; 57202389803; 35746565700	The potential roles of m6A modification in regulating the inflammatory response in microglia	2021	Journal of Neuroinflammation	10.1186/s12974-021-02205-z	https://www.scopus.com/inward/record.uri?eid=2-s2.0-85110867580&doi=10.1186%2fs12974-021-02205-z&partnerID=40&md5=66eabe03a97a29f9b6eb1a910878b4c2	China National Clinical Research Center for Neurological Diseases, Beijing Tiantan Hospital, Capital Medical University, 119 South Fourth Ring West Road, Fengtai District, Beijing, 100070, China	Background: Microglia are key regulators of the inflammatory response in the brain. Adenosine in RNAs can be converted to m6A (N6-methyladenosine), which regulates RNA metabolism and functions as a key epitranscriptomic modification. The m6A modification pattern and m6A-related signatures under pro-inflammatory and anti-inflammatory conditions of microglia remain unclear. Methods: Primary rat mic…	Bioinformatics analysis; Inflammatory response; m<sup>6</sup>A lncRNA; m<sup>6</sup>A mRNA; Methylated m<sup>6</sup>A RNA immunoprecipitation; Microarray; Microglia; Phenotype; Polarization	Adenosine; Animals; Animals, Newborn; Cells, Cultured; Inflammation Mediators; Microglia; Rats; Rats, Sprague-Dawley; RNA, Messenger; Transcriptome; 6 n methyladenosine; long untranslated RNA; messenger RNA; adenosine; autacoid; messenger RNA; N-methyladenosine; transcriptome; animal cell; animal tissue; Article; cell metabolism; controlled study; degenerative disease; DNA methylation; DNA microa…	Lawson L.J., Perry V.H., Dri P., Gordon S., Heterogeneity in the distribution and morphology of microglia in the normal adult mouse brain, Neuroscience., 39, 1, pp. 151-170, (1990); Axel N., Frank K., Fritjof H., Resting microglial cells are highly dynamic surveillants of brain parenchyma in vivo, Science., 308, 5726, pp. 1314-1318, (2005); Katsumoto A., Lu H., Miranda A.S., Ransohoff R.M., Ontog…	X. Liu; China National Clinical Research Center for Neurological Diseases, Beijing Tiantan Hospital, Capital Medical University, Beijing, 119 South Fourth Ring West Road, Fengtai District, 100070, China; email: lxrpumc@163.com	BioMed Central Ltd	17422094		34225746	English	J. Neuroinflamm.	Article	All Open Access; Gold Open Access; Green Open Access	Scopus	2-s2.0-85110867580
Wang D.; Han Y.; Peng L.; Huang T.; He X.; Wang J.; Ou C.	Wang, Dan (58199915200); Han, Yingying (57740247600); Peng, Lushan (57419815900); Huang, Tao (57376206500); He, Xiaoyun (57195940960); Wang, Junpu (55351944900); Ou, Chunlin (56606737700)	58199915200; 57740247600; 57419815900; 57376206500; 57195940960; 55351944900; 56606737700	Crosstalk between N6-methyladenosine (m6A) modification and noncoding RNA in tumor microenvironment	2023	International Journal of Biological Sciences	10.7150/ijbs.79651	https://www.scopus.com/inward/record.uri?eid=2-s2.0-85157997643&doi=10.7150%2fijbs.79651&partnerID=40&md5=54e84793662e2e7ca19b2a7ff01d8e87	Department of Pathology, Xiangya Hospital, Central South University, Hunan, Changsha, 410008, China; Departments of Ultrasound Imaging, Xiangya Hospital, Central South University, Hunan, Changsha, 410008, China; Department of Pathology, School of Basic Medicine, Central South University, Hunan, Changsha, 410031, China; Key Laboratory of Hunan Province in Neurodegenerative Disorders, Xiangya Hospi…	N6-methyladenosine (m6A) is the most abundant RNA modification in eukaryotes, and it participates in the regulation of pathophysiological processes in various diseases, including malignant tumors, by regulating the expression and function of both coding and non-coding RNAs (ncRNAs). More and more studies demonstrated that m6A modification regulates the production, stability, and degradation of nc…	Biomarker; Exosome; M6A; NcRNA; Targeted therapy; Tumor metastasis; Tumor microenvironment	Adenosine; Biological Transport; RNA, Untranslated; Tumor Microenvironment; adenosine; untranslated RNA; genetics; transport at the cellular level; tumor microenvironment	Cantara WA, Crain PF, Rozenski J, McCloskey JA, Harris KA, Zhang X, Et al., The RNA modification database, RNAMDB: 2011 update, Nucleic Acids Research, (2011); Meyer KD, Saletore Y, Zumbo P, Elemento O, Mason CE, Jaffrey SR., Comprehensive Analysis of mRNA Methylation Reveals Enrichment in 3 ' UTRs and near Stop Codons, Cell, 149, pp. 1635-1646, (2012); Dominissini D, Moshitch-Moshkovitz S, Schwa…	C. Ou; Department of Pathology, Xiangya Hospital, Central South University, Changsha, Hunan, 410008, China; email: ouchunlin@csu.edu.cn	Ivyspring International Publisher	14492288		37151887	English	Int. J. Biol. Sci.	Review	All Open Access; Gold Open Access; Green Open Access	Scopus	2-s2.0-85157997643
Ni X.; Li X.; Hu B.; Wang L.	Ni, Xiuqin (36545259400); Li, Xing (58003693100); Hu, Bing (57201199048); Wang, Li (57201201803)	36545259400; 58003693100; 57201199048; 57201201803	Chronic allergic asthma alters m6A epitranscriptomic tagging of mRNAs and lncRNAs in the lung	2022	Bioscience reports	10.1042/BSR20221395	https://www.scopus.com/inward/record.uri?eid=2-s2.0-85143917130&doi=10.1042%2fBSR20221395&partnerID=40&md5=f11e558fba16c452f1002fafb0b42a3e	Department of basic medicine, School of Health Sciences, Jiangsu Food & Pharmaceutical Science College, Huai'an, 223003, China; Department of Anatomy, Harbin Medical University-Daqing, Daqing, 163319, China; Department of Neurology, Hongze District People's Hospital, Jiangsu Province, Huai'an, 223001, China	To evaluate the role of m6A methylation of mRNAs and long non-coding RNAs (lncRNAs) in chronic allergic asthma. Transcriptome-wide N6-methyladenosine (m6A) changes in BALB/c mice were profiled using immunoprecipitated methylated RNAs with microarrays in lung with chronic allergic asthma. Gene ontology (GO) and KEGG analyses were conducted. Target genes were verified by methylated RNA immunoprecip…	allergic asthma; epitranscriptome; IL17RB; lung; N6-methyladenosine	Adenosine; Animals; Lung; Methylation; Mice; RNA, Long Noncoding; RNA, Messenger; adenosine; long untranslated RNA; messenger RNA; animal; genetics; lung; metabolism; methylation; mouse			NLM (Medline)	15734935		36250525	English	Biosci Rep	Article	All Open Access; Gold Open Access; Green Open Access	Scopus	2-s2.0-85143917130
Shen Z.-J.; Han Y.-C.; Nie M.-W.; Wang Y.-N.; Xiang R.-L.; Xie H.-Z.	Shen, Zhu-Jun (7403324511); Han, Ye-Chen (55623521800); Nie, Mu-Wen (57216994273); Wang, Yi-Ning (59118420900); Xiang, Ruo-Lan (35766040500); Xie, Hong-Zhi (32267720700)	7403324511; 55623521800; 57216994273; 59118420900; 35766040500; 32267720700	Genome-wide identification of altered RNA m6A profiles in vascular tissue of septic rats	2021	Aging	10.18632/aging.203506	https://www.scopus.com/inward/record.uri?eid=2-s2.0-85115645551&doi=10.18632%2faging.203506&partnerID=40&md5=eb6a4c93dc0b8f5a1af6688f0940ecea	Department of Cardiology, Peking Union Medical College Hospital, Chinese Academy of Medical Sciences and Peking Union Medical College, Beijing, 100191, China; Department of Physiology and Pathophysiology, Peking University School of Basic Medical Sciences, Beijing, 100191, China	Sepsis is the leading cause of death in hospital intensive care units. In light of recent studies showing that variations in N6-methyladenosine (m6A) levels in different RNA transcripts influence inflammatory responses, we evaluated the m6A profiles of rat aortic mRNAs and lncRNAs after lipopolysaccharide (LPS)-induced sepsis. LC-MS-based mRNA modification analysis showed that global m6A levels w…	aorta; N6-methyladenosine; sepsis	Animals; Gene Expression Profiling; Gene Regulatory Networks; Genome-Wide Association Study; Lipopolysaccharides; Male; Microarray Analysis; Rats; Rats, Wistar; RNA, Long Noncoding; RNA, Messenger; Sepsis; lipopolysaccharide; long untranslated RNA; messenger RNA; animal; biosynthesis; gene expression profiling; gene regulatory network; genetics; genome-wide association study; male; metabolism; mi…	Zarjou A, Black LM, McCullough KR, Hull TD, Esman SK, Boddu R, Varambally S, Chandrashekar DS, Feng W, Arosio P, Poli M, Balla J, Bolisetty S., Ferritin Light Chain Confers Protection Against Sepsis-Induced Inflammation and Organ Injury, Front Immunol, 10, (2019); Pavon A, Binquet C, Kara F, Martinet O, Ganster F, Navellou JC, Castelain V, Barraud D, Cousson J, Louis G, Perez P, Kuteifan K, Noiro…	H.-Z. Xie; Department of Cardiology, Peking Union Medical College Hospital, Chinese Academy of Medical Sciences and Peking Union Medical College, Beijing, 100191, China; email: drxiehz@163.com	Impact Journals LLC	19454589		34507301	English	Aging	Article	All Open Access; Gold Open Access	Scopus	2-s2.0-85115645551
Jin H.; Wu Z.; Tan B.; Liu Z.; Zu Z.; Wu X.; Bi Y.; Hu X.	Jin, Haifeng (15622767300); Wu, Zheng (58842591800); Tan, Bibo (35410917600); Liu, Zhen (57241099800); Zu, Zhanfei (57770317400); Wu, Xiaoyun (57770350200); Bi, Yuwang (57770157000); Hu, Xingmao (57770255800)	15622767300; 58842591800; 35410917600; 57241099800; 57770317400; 57770350200; 57770157000; 57770255800	Ibuprofen promotes p75 neurotrophin receptor expression through modifying promoter methylation and N6-methyladenosine-RNA-methylation in human gastric cancer cells	2022	Bioengineered	10.1080/21655979.2022.2092674	https://www.scopus.com/inward/record.uri?eid=2-s2.0-85133101491&doi=10.1080%2f21655979.2022.2092674&partnerID=40&md5=acf3372e59283cee27a71eb9fa56c515	Department of Gastroenterology, The 980th Hospital, PLA Joint Logistics Support Force (Primary Bethune International Peace Hospital of PLA), Hebei, Shijiazhuang, China; Department of Tumor Immunology, The Fourth Hospital of Hebei Medical University, Hebei, Shijiazhuang, China; Department of General Surgery, Fourth Hospital of Hebei Medical University, Hebei, Shijiazhuang, China; Information Secti…	It is acknowledged that nonsteroidal anti-inflammatory drugs (NSAIDs) can participate in various signaling pathways, while information about their epigenetic effects are limited. p75NTR (p75 neurotrophin receptor) can inhibit tumor growth by inducing cell cycle arrest and regulating cell cycle arrest and apoptotic cell death. The expression of p75NTR is influenced by epigenetic roles. We explored…	gastric cancer; Ibuprofen; m6A-RNA-methylation; p75NTR; promoter methylation	Adenosine; Alpha-Ketoglutarate-Dependent Dioxygenase FTO; Anti-Inflammatory Agents, Non-Steroidal; Humans; Ibuprofen; Methylation; Methyltransferases; Receptor, Nerve Growth Factor; RNA, Messenger; Stomach Neoplasms; Tumor Suppressor Protein p53; 6 n methyladenosine; alkylated DNA repair protein alkB homolog 5; ibuprofen; neurotrophin receptor p75; nonsteroid antiinflammatory agent; protein p53; …	Hung W.-C., Anti-metastatic action of non-steroidal anti-inflammatory drugs, Kaohsiung J Med Sci, 24, 8, pp. 392-397, (2008); Wechter W.J., Kantoci D., Murray E.D., Et al., R-flurbiprofen chemoprevention and treatment of intestinal adenomas in the APC(Min)/+ mouse model: implications for prophylaxis and treatment of colon cancer, Cancer Res, 57, 19, pp. 4316-4324, (1997); Wechter W.J., Leipold D.…	H. Jin; Department of Gastroenterology, The 980st Hospital, PLA Joint Logistics Support Force (Primary Bethune International Peace Hospital of PLA), Handan, No. 3 South Ring Road, Hebei, 050082, China; email: hpyykyzy@163.com	Taylor and Francis Ltd.	21655979		35758042	English	Bioengineered	Article	All Open Access; Gold Open Access	Scopus	2-s2.0-85133101491
Chien C.-S.; Li J.Y.-S.; Chien Y.; Wang M.-L.; Yarmishyn A.A.; Tsai P.-H.; Juan C.-C.; Nguyen P.; Cheng H.-M.; Huo T.-I.; Chiou S.-H.; Chien S.	Chien, Chian-Shiu (24480657800); Li, Julie Yi-Shuan (12242003000); Chien, Yueh (36117502000); Wang, Mong-Lien (37032180700); Yarmishyn, Aliaksandr A. (23020272100); Tsai, Ping-Hsing (16647561500); Juan, Chi-Chang (7005684030); Nguyen, Phu (7201630214); Cheng, Hao-Min (57026688600); Huo, Teh-Ia (7007115947); Chiou, Shih-Hwa (56725088700); Chien, Shu (58424786100)	24480657800; 12242003000; 36117502000; 37032180700; 23020272100; 16647561500; 7005684030; 7201630214; 57026688600; 7007115947; 56725088700; 58424786100	METTL3-dependent N6-methyladenosine RNA modification mediates the atherogenic inflammatory cascades in vascular endothelium	2021	Proceedings of the National Academy of Sciences of the United States of America	10.1073/pnas.2025070118	https://www.scopus.com/inward/record.uri?eid=2-s2.0-85100979849&doi=10.1073%2fpnas.2025070118&partnerID=40&md5=b844d4509814b82ff231e55eb243c020	Innovative Cellular Therapy Center, Department of Medical Research, Taipei Veterans General Hospital, Taipei, 11217, Taiwan; Institute of Pharmacology, School of Medicine, National Yang-Ming University, Taipei, 11221, Taiwan; Institute of Engineering in Medicine, Department of Bioengineering, University of California San Diego, San diego, 92093, CA, United States; Institute of Food Safety and Hea…	Atherosclerosis is characterized by the plaque formation that restricts intraarterial blood flow. The disturbed blood flow with the associated oscillatory stress (OS) at the arterial curvatures and branch points can trigger endothelial activation and is one of the risk factors of atherosclerosis. Many studies reported the mechanotransduction related to OS and atherogenesis; however, the transcrip…	N6-methyladeosine RNA methylation | METTL3 | shear stress | atherosclerosis | oscillatory flow	Adenosine; Animals; Atherosclerosis; Endothelium, Vascular; Epigenesis, Genetic; Human Umbilical Vein Endothelial Cells; Humans; Kruppel-Like Transcription Factors; Methyltransferases; Mice; Mice, Inbred C57BL; NF-kappa B; NLR Proteins; RNA Processing, Post-Transcriptional; RNA, Messenger; RNA-Binding Proteins; THP-1 Cells; Transcriptome; 6 n methyladenosine; cryopyrin; kruppel like factor 4; met…	Chiu J. J., Chien S., Effects of disturbed flow on vascular endothelium: Pathophysiological basis and clinical perspectives, Physiol. Rev, 91, pp. 327-387, (2011); Ajami N. E., Et al., Systems biology analysis of longitudinal functional response of endothelial cells to shear stress, Proc. Natl. Acad. Sci. U.S.A, 114, pp. 10990-10995, (2017); Neth P., Nazari-Jahantigh M., Schober A., Weber C., Mic…	S.-H. Chiou; Innovative Cellular Therapy Center, Department of Medical Research, Taipei Veterans General Hospital, Taipei, 11217, Taiwan; email: shchiou@vghtpe.gov.tw; S. Chien; Institute of Engineering in Medicine, Department of Bioengineering, University of California San Diego, San diego, 92093, United States; email: shuchien@eng.ucsd.edu	National Academy of Sciences	278424	PNASA	33579825	English	Proc. Natl. Acad. Sci. U. S. A.	Article	All Open Access; Bronze Open Access	Scopus	2-s2.0-85100979849
Xian J.; Shang M.; Dai Y.; Wang Q.; Long X.; Li J.; Cai Y.; Xia C.; Peng X.	Xian, Jiayi (57210356233); Shang, Mingwei (57377515400); Dai, Yu (57203017902); Wang, Qi (57199481234); Long, Xinxin (57219050878); Li, Jiazheng (57377826900); Cai, Yantao (57214628293); Xia, Chenglai (26431668400); Peng, Xuebiao (24471890600)	57210356233; 57377515400; 57203017902; 57199481234; 57219050878; 57377826900; 57214628293; 26431668400; 24471890600	N6-methyladenosine-modified long non-coding RNA AGAP2-AS1 promotes psoriasis pathogenesis via miR-424–5p/AKT3 axis	2022	Journal of Dermatological Science	10.1016/j.jdermsci.2021.11.007	https://www.scopus.com/inward/record.uri?eid=2-s2.0-85121447519&doi=10.1016%2fj.jdermsci.2021.11.007&partnerID=40&md5=c4961d7c3e0d4a5919b3fdc2cc442d78	Department of Dermatology, Nanfang Hospital, Southern Medical University, Guangzhou, China; Department of Dermatology and Rheumatology, Foshan Women and Children's Hospital Affiliated to Southern Medical University, Foshan, China; Affiliated Foshan Maternity & Child Healthcare Hospital, Southern Medical University, Foshan, China; School of Pharmaceutical Sciences, Southern Medical University, Gua…	Background: Psoriasis is a chronic, complicated, and recurrent inflammatory skin disease. However, the precise molecular mechanisms remain largely elusive and the present treatment is unsatisfactory. Objective: This study aimed to unravel the functions of long noncoding RNA (lncRNA) AGAP2-AS1 and its biological mechanism in psoriasis pathogenesis, hinting for the new therapeutic targets in psoria…	AGAP2-AS1; AKT3; M<sup>6</sup>A; MiR-424–5p; Psoriasis	Adenosine; Adolescent; Adult; Case-Control Studies; Child; Female; Humans; Keratinocytes; Male; Methyltransferases; MicroRNAs; Middle Aged; Proto-Oncogene Proteins c-akt; Psoriasis; RNA, Long Noncoding; Up-Regulation; Young Adult; 6 n methyladenosine; AGAP2 AS1; AKT3 protein; long untranslated RNA; mammalian target of rapamycin; methyltransferase; METTL3 protein; microRNA; miR 424 5p; protein kin…	Michalek I.M., Loring B., John S.M., A systematic review of worldwide epidemiology of psoriasis, J. Eur. Acad. Dermatol. Venereol., 31, pp. 205-212, (2017); Boehncke W.H., Schon M.P., Psoriasis, LANCET., 386, pp. 983-994, (2015); Ghosh S., Gensler L.S., Yang Z., Gasink C., Chakravarty S.D., Farahi K., Ramachandran P., Ott E., Strober B.E., Ustekinumab safety in psoriasis, psoriatic arthritis, and…	Y. Cai; Department of Dermatology, Nanfang Hospital, Southern Medical University, Guangzhou, 510515, China; email: cypeach1030@163.com	Elsevier Ireland Ltd	9231811	JDSCE	34930676	English	J. Dermatol. Sci.	Article		Scopus	2-s2.0-85121447519
Chen H.-M.; Li H.; Lin M.-X.; Fan W.-J.; Zhang Y.; Lin Y.-T.; Wu S.-X.	Chen, Hui-Ming (57832247700); Li, Hang (57207820133); Lin, Meng-Xian (57831759300); Fan, Wei-Jie (57831759400); Zhang, Yi (57221363554); Lin, Yan-Ting (56729243600); Wu, Shu-Xiang (57201480900)	57832247700; 57207820133; 57831759300; 57831759400; 57221363554; 56729243600; 57201480900	Research Progress for RNA Modifications in Physiological and Pathological Angiogenesis	2022	Frontiers in Genetics	10.3389/fgene.2022.952667	https://www.scopus.com/inward/record.uri?eid=2-s2.0-85135454410&doi=10.3389%2ffgene.2022.952667&partnerID=40&md5=c99181516b3a974276bb44ad2c816002	Key Laboratory of Gastrointestinal Cancer (Fujian Medical University), Ministry of Education, School of Basic Medical Sciences, Fujian Medical University, Fuzhou, China; Fujian Key Laboratory of Tumor Microbiology, Department of Medical Microbiology, Fujian Medical University, Fuzhou, China	As a critical layer of epigenetics, RNA modifications demonstrate various molecular functions and participate in numerous biological processes. RNA modifications have been shown to be essential for embryogenesis and stem cell fate. As high-throughput sequencing and antibody technologies advanced by leaps and bounds, the association of RNA modifications with multiple human diseases sparked researc…	angiogenesis; m<sup>5</sup>C; m<sup>6</sup>A; RNA modifications; tumor	1 methyladenosine; 5 methylcytosine; 6 n methyladenosine; 7 methylguanosine; angiogenesis inhibitor; organic compound; pseudopuridine; unclassified drug; angiogenesis; atherosclerosis; embryo development; human; inflammation; ischemia; metastasis; neoplasm; nucleic acid structure, metabolism and function; physiology; Review; RNA modification; tumor angiogenesis	Agris P.F., The Importance of Being Modified: Roles of Modified Nucleosides and Mg<sup>2+</sup> in RNA Structure and Function, Prog. Nucleic Acid. Res. Mol. Biol, 53, pp. 79-129, (1996); Agris P.F., The Importance of Being Modified: Roles of Modified Nucleosides and Mg<sup>2+</sup> in RNA Structure and Function, Prog. nucleic acid Res. Mol. Biol, 53, pp. 79-129, (1996); Arguello A.E., DeLiberto A…	Y.-T. Lin; Ministry of Education, School of Basic Medical Sciences, Key Laboratory of Gastrointestinal Cancer (Medical University), Fujian Medical University, Fujian, Fuzhou, China; email: tingyanlin@fjmu.edu.cn; S.-X. Wu; Key Laboratory of Gastrointestinal Cancer (Fujian Medical University), Ministry of Education, School of Basic Medical Sciences, Fujian Medical University, Fuzhou, China; email:…	Frontiers Media S.A.	16648021			English	Front. Genet.	Review	All Open Access; Gold Open Access	Scopus	2-s2.0-85135454410
Ding L.; Wu H.; Wang Y.; Li Y.; Liang Z.; Xia X.; Zheng J.C.	Ding, Lu (57214837784); Wu, Huiran (57687601100); Wang, Yi (55153443700); Li, Yun (57686300400); Liang, Zhanping (57687601200); Xia, Xiaohuan (57204549577); Zheng, Jialin C. (7403974809)	57214837784; 57687601100; 55153443700; 57686300400; 57687601200; 57204549577; 7403974809	m6A Reader Igf2bp1 Regulates the Inflammatory Responses of Microglia by Stabilizing Gbp11 and Cp mRNAs	2022	Frontiers in Immunology	10.3389/fimmu.2022.872252	https://www.scopus.com/inward/record.uri?eid=2-s2.0-85130028973&doi=10.3389%2ffimmu.2022.872252&partnerID=40&md5=afb47416f9731c7d81f10b5f3468c00d	Center for Translational Neurodegeneration and Regenerative Therapy, Tongji Hospital Affiliated to Tongji University School of Medicine, Shanghai, China; Translational Research Center, Shanghai Yangzhi Rehabilitation Hospital Affiliated to Tongji University School of Medicine, Shanghai, China; Translational Research Institute of Brain and Brain-Like Intelligence, Shanghai Fourth People’s Hospital…	Microglia are brain resident cells that function as brain phagocytic macrophages. The inflammatory responses of microglia induced by pathologic insults are key regulators in the progression of various neurological disorders. Currently, little is known about how these responses are regulated intrinsically. Here, it is observed that LPS-activated microglia exhibit distinct N6-methyladenosine (m6A) …	Cp; Gbp11; Igf2bp1; m6A reader; microglial activation; neuroinflammation	Adenosine; Lipopolysaccharides; Methylation; Microglia; RNA, Messenger; 6 n methyladenosine; insulin like growth factor 2 mRNA binding protein 1; interleukin 1beta; lipopolysaccharide; messenger RNA; pathogen associated molecular pattern; small interfering RNA; somatomedin B; toll like receptor; toll like receptor 2; toll like receptor 4; tumor necrosis factor; unclassified drug; adenosine; lipop…	Wolf S.A., Boddeke H.W., Kettenmann H., Microglia in Physiology and Disease, Annu Rev Physiol, 79, (2017); Colonna M., Butovsky O., Microglia Function in the Central Nervous System During Health and Neurodegeneration, Annu Rev Immunol, 35, (2017); Wright-Jin E.C., Gutmann D.H., Microglia as Dynamic Cellular Mediators of Brain Function, Trends Mol Med, 25, 11, (2019); Prinz M., Jung S., Priller J.…	X. Xia; Center for Translational Neurodegeneration and Regenerative Therapy, Tongji Hospital Affiliated to Tongji University School of Medicine, Shanghai, China; email: xiaohuan_xia1@163.com; J.C. Zheng; Center for Translational Neurodegeneration and Regenerative Therapy, Tongji Hospital Affiliated to Tongji University School of Medicine, Shanghai, China; email: jialinzheng@tongji.edu.cn	Frontiers Media S.A.	16643224		35572575	English	Front. Immunol.	Article	All Open Access; Gold Open Access; Green Open Access	Scopus	2-s2.0-85130028973
Tang L.; Wei X.; Li T.; Chen Y.; Dai Z.; Lu C.; Zheng G.	Tang, Lipeng (55566843300); Wei, Xingyan (57222508031); Li, Tong (57222507731); Chen, Yi (59074612900); Dai, Zhenhua (7201387704); Lu, Chuanjian (57191845893); Zheng, Guangjuan (7402224501)	55566843300; 57222508031; 57222507731; 59074612900; 7201387704; 57191845893; 7402224501	Emerging Perspectives of RNA N6-methyladenosine (m6A) Modification on Immunity and Autoimmune Diseases	2021	Frontiers in Immunology	10.3389/fimmu.2021.630358	https://www.scopus.com/inward/record.uri?eid=2-s2.0-85102944146&doi=10.3389%2ffimmu.2021.630358&partnerID=40&md5=1df5c86d1e45b1db0e7d9eb60c225618	Department of Pharmacology of Traditional Chinese Medicine, The Second Clinical College of Guangzhou University of Chinese Medicine, Guangzhou, China; Department of Pathogen Biology, The Chinses Center for Disease Control and Prevention, Beijing, China; Department of Pharmacy, The Second Clinical College of Guangzhou University of Chinese Medicine, Guangzhou, China; School of Pharmaceutical Scien…	N6-methyladenosine (m6A) modification, the addition of a methylation decoration at the position of N6 of adenosine, is one of the most prevalent modifications among the over 100 known chemical modifications of RNA. Numerous studies have recently characterized that RNA m6A modification functions as a critical post-transcriptional regulator of gene expression through modulating various aspects of R…	adaptive immunity; autoimmune disease; innate immunity; N<sup>6</sup>-methyladenosine (m<sup>6</sup>A); viral infection	Adaptive Immunity; Adenine; Autoimmune Diseases; Dendritic Cells; Humans; Immunity, Innate; Methylation; RNA Processing, Post-Transcriptional; Virus Diseases; 6 n methyladenosine; adenosine; alpha ketoglutarate dependent dioxygenase FTO; antisense oligonucleotide; B7 antigen; biological marker; chemokine receptor CCR4; cryopyrin; fragile X mental retardation protein; hemagglutinin; heterogeneous …	Desrosiers R., Friderici K., Rottman F., Identification of methylated nucleosides in messenger RNA from Novikoff hepatoma cells, Proc Natl Acad Sci USA, 71, pp. 3971-3975, (1974); Dominissini D., Moshitch-Moshkovitz S., Schwartz S., Salmon-Divon M., Ungar L., Osenberg S., Et al., Topology of the human and mouse m<sup>6</sup>A RNA methylomes revealed by m6A-seq, Nature, 485, pp. 201-206, (2012); M…	L. Tang; Department of Pharmacology of Traditional Chinese Medicine, The Second Clinical College of Guangzhou University of Chinese Medicine, Guangzhou, China; email: tlp0509@163.com; G. Zheng; Department of Pharmacology of Traditional Chinese Medicine, The Second Clinical College of Guangzhou University of Chinese Medicine, Guangzhou, China; email: zhengguangjuan@gzucm.edu.cn; Z. Dai; Section of…	Frontiers Media S.A.	16643224		33746967	English	Front. Immunol.	Review	All Open Access; Gold Open Access	Scopus	2-s2.0-85102944146
Xu M.; Zhuo R.; Tao S.; Liang Y.; Liu C.; Liu Q.; Wang T.; Zhong X.	Xu, Menghui (57539413100); Zhuo, Ruhao (57216397121); Tao, Shengxiang (57932414200); Liang, Yaxu (57212245022); Liu, Chunru (57429968800); Liu, Qingyang (57939925500); Wang, Tian (7405564454); Zhong, Xiang (26656475900)	57539413100; 57216397121; 57932414200; 57212245022; 57429968800; 57939925500; 7405564454; 26656475900	M6A RNA Methylation Mediates NOD1/NF-kB Signaling Activation in the Liver of Piglets Challenged with Lipopolysaccharide	2022	Antioxidants	10.3390/antiox11101954	https://www.scopus.com/inward/record.uri?eid=2-s2.0-85140449980&doi=10.3390%2fantiox11101954&partnerID=40&md5=b0a0a96644083b23eb0fe5c1ed8cb140	College of Animal Science and Technology, Nanjing Agricultural University, Nanjing, 210095, China; College of Veterinary Medicine, Nanjing Agricultural University, Nanjing, 210095, China; College of Life Science, Nanjing Agricultural University, Nanjing, 210095, China	N6-methyladenosine (m6A) is the most abundant internal modification that widely participates in various immune and inflammatory responses; however, its regulatory mechanisms in the inflammation of liver induced by lipopolysaccharide in piglets remain largely unknown. In the present study, piglets were intraperitoneally injected with 80 μg/kg LPS or an equal dose of sterile saline. Results indicat…	immune; inflammation; m<sup>6</sup>A modification; NF-κB; NOD1; oxidative stress; piglet		Racanelli V., Rehermann B., The liver as an immunological organ, Hepatology, 43, pp. S54-S62, (2006); Kumar H., Kawai T., Akira S., Pathogen recognition by the innate immune system, Int. Rev. Immunol, 30, pp. 16-34, (2011); He P., Noda Y., Sugiyama K., Green tea suppresses lipopolysaccharide-induced liver injury in d-galactosamine-sensitized rats, J. Nutr, 131, pp. 1560-1567, (2001); Li Q., Tan Y…	X. Zhong; College of Animal Science and Technology, Nanjing Agricultural University, Nanjing, 210095, China; email: zhongxiang@njau.edu.cn	MDPI	20763921			English	Antioxidants	Article	All Open Access; Gold Open Access; Green Open Access	Scopus	2-s2.0-85140449980
Guo M.; Yan R.; Ji Q.; Yao H.; Sun M.; Duan L.; Xue Z.; Jia Y.	Guo, Min (55732391800); Yan, Rui (56785088900); Ji, Qingwei (35214753700); Yao, Hongmei (35207566400); Sun, Meng (57202767097); Duan, Liqin (57212574586); Xue, Zheng (57212570952); Jia, Yongping (57191831815)	55732391800; 56785088900; 35214753700; 35207566400; 57202767097; 57212574586; 57212570952; 57191831815	IFN regulatory Factor-1 induced macrophage pyroptosis by modulating m6A modification of circ_0029589 in patients with acute coronary syndrome	2020	International Immunopharmacology	10.1016/j.intimp.2020.106800	https://www.scopus.com/inward/record.uri?eid=2-s2.0-85087755824&doi=10.1016%2fj.intimp.2020.106800&partnerID=40&md5=a4f7e170824814b48a087ab4d590252f	Department of Cardiology, First Hospital of Shanxi Medical University, Taiyuan, China; Shanxi Medical University, Taiyuan, China; Department of Cardiology, the People's Hospital of Guangxi Zhuang Autonomous Region, Nanning, China	Background: Pyroptosis is identified as a novel form of inflammatory programmed cell death and has been recently found to be closely related to atherosclerosis (AS). We found that IFN regulatory factor-1(IRF-1) effectively promotes macrophage pyroptosis in patients with acute coronary syndrome (ACS). Subsequent studies have demonstrated that circRNAs are implicated in AS. However, the underlying …	Atherosclerosis; Circ_0029589; IRF-1; Macrophage pyroptosis; N6-methyladenosine	Acute Coronary Syndrome; Aged; Cells, Cultured; Female; Humans; Inflammation; Interferon Regulatory Factor-1; Macrophages; Male; Methyltransferases; Middle Aged; Pyroptosis; RNA, Circular; RNA, Small Interfering; 6 n methyladenosine; circular ribonucleic acid; green fluorescent protein; interferon regulatory factor 1; lentivirus vector; methyltransferase; mettl3 protein; oxidized low density lipo…	Lusis A.J., Atherosclerosis, Nature, 407, pp. 233-241, (2000); Xu Y.J., Zheng L., Hu Y.W., Wang Q., Pyroptosis and its relationship to atherosclerosis, Clinica chimica acta; Int. J. Clin. Chem., 476, pp. 28-37, (2018); Grootaert M.O.J., Moulis M., Roth L., Martinet W., Vindis C., Bennett M.R., De Meyer G.R.Y., Vascular smooth muscle cell death, autophagy and senescence in atherosclerosis, Cardiov…	M. Guo; Department of Cardiology, First Hospital of Shanxi Medical University, Taiyuan, 030000, China; email: guomin162@163.com	Elsevier B.V.	15675769	IINMB	32674051	English	Int. Immunopharmacol.	Article		Scopus	2-s2.0-85087755824
Feng Y.; Hu Y.; Hou Z.; Sun Q.; Jia Y.; Zhao R.	Feng, Yue (57208331231); Hu, Yun (56621598900); Hou, Zhen (57199509285); Sun, Qinwei (42062392800); Jia, Yimin (55101269500); Zhao, Ruqian (7401975625)	57208331231; 56621598900; 57199509285; 42062392800; 55101269500; 7401975625	Chronic corticosterone exposure induces liver inflammation and fibrosis in association with m6A-linked post-transcriptional suppression of heat shock proteins in chicken	2020	Cell Stress and Chaperones	10.1007/s12192-019-01034-7	https://www.scopus.com/inward/record.uri?eid=2-s2.0-85075235142&doi=10.1007%2fs12192-019-01034-7&partnerID=40&md5=930e74021a46306f250756f0a19f7d3e	MOE Joint International Research Laboratory of Animal Health & Food Safety, Nanjing Agricultural University, Nanjing, 210095, China; Key Laboratory of Animal Physiology & Biochemistry, College of Veterinary Medicine, Nanjing Agricultural University, Nanjing, 210095, China; Quality and Safety Control, Jiangsu Collaborative Innovation Center of Meat Production and Processing, Nanjing, 210095, China	Our previous study had shown that chronic corticosterone (CORT) exposure causes excessive fat deposition in chicken liver, yet it remains unknown whether it is associated with inflammation and fibrosis. In general, heat shock proteins (HSPs) are activated in response to acute stress to play a cytoprotective role, and this activation is associated with m6A-mediated post-transcriptional regulation.…	Chicken liver; Fibrosis; Heat shock proteins; Inflammation; N6-methyladenosine	Animals; Chickens; Corticosterone; DNA Methylation; Fibrosis; Gene Expression Regulation; Heat-Shock Proteins; Inflammation; Liver Cirrhosis; Methyltransferases; 6 n methyladenosine; alanine aminotransferase; alpha smooth muscle actin; aspartate aminotransferase; col1a1 protein; col1a2 protein; corticosterone; gelatinase A; heat shock protein; interleukin 1beta; methyltransferase; mettl3 protein;…	Abu-Elsaad N.M., Serrya M.S., El-Karef A.M., Ibrahim T.M., The heat shock protein 90 inhibitor, 17-AAG, attenuates thioacetamide induced liver fibrosis in mice, Pharmacol Rep, 68, pp. 275-282, (2016); Ambade A., Catalano D., Lim A., Mandrekar P., Inhibition of heat shock protein (molecular weight 90 kDa) attenuates proinflammatory cytokines and prevents lipopolysaccharide-induced liver injury in …	Y. Jia; Quality and Safety Control, Jiangsu Collaborative Innovation Center of Meat Production and Processing, Nanjing, 210095, China; email: yiminj@njau.edu.cn	Springer	13558145	CSCHF	31745845	English	Cell Stress Chaperones	Article	All Open Access; Hybrid Gold Open Access	Scopus	2-s2.0-85075235142
Tan X.; Li Q.; Zhang Q.; Fan G.; Liu Z.; Zhou K.	Tan, Xinjie (57283937600); Li, Qian (57831896800); Zhang, Qinya (57211435264); Fan, Gang (56625513200); Liu, Zhuo (57224926278); Zhou, Kunyan (57669238800)	57283937600; 57831896800; 57211435264; 56625513200; 57224926278; 57669238800	Integrative Analysis Reveals Potentially Functional N6-Methylandenosine-Related Long Noncoding RNAs in Colon Adenocarcinoma	2021	Frontiers in Genetics	10.3389/fgene.2021.739344	https://www.scopus.com/inward/record.uri?eid=2-s2.0-85116344949&doi=10.3389%2ffgene.2021.739344&partnerID=40&md5=669dd680e03db7e23db0bbf651c1d647	School of Medicine, Nankai University, Tianjin, China; Department of Pediatrics, The Second Affiliated Hospital of Zheng Zhou University, Zhengzhou, China; Department of Anesthesiology, Heidelberg University Hospital, Heidelberg, Germany; Department of Anesthesiology, Affiliated Hospital of Guizhou Medical University, Guiyang, China; The Affiliated Cancer Hospital of Xiangya School of Medicine, C…	N6-methyladenosine (m6A) is one of the most prevalent RNA modifications in mRNA and non-coding RNA. In this study, we identified 10 upregulated m6A regulators at both mRNA and protein levels, and 2,479 m6A-related lncRNAs. Moreover, the m6A-related long noncoding RNAs (lncRNAs) could clearly stratify the colon adenocarcinoma (COAD) samples into three subtypes. The subtype 2 had nearly 40% of samp…	colon adenocarcinoma; long noncoding RNAs; m6A-related lncRNAs; metabolic reprogramming; N6-methylAdenosine (m6A)	6 n methyladenosine; interleukin 10; interleukin 13; long untranslated RNA; messenger RNA; Rho guanine nucleotide binding protein; Article; cancer survival; cancer tissue; citric acid cycle; clinical evaluation; colon adenocarcinoma; controlled study; data analysis; electron transport; gene expression; gene mutation; histology; human; human tissue; major clinical study; microsatellite instability…	Arnes L., Liu Z., Wang J., Maurer C., Sagalovskiy I., Sanchez-Martin M., Et al., Comprehensive Characterisation of Compartment-specific Long Non-coding RNAs Associated with Pancreatic Ductal Adenocarcinoma, Gut, 68, 3, pp. 499-511, (2019); Comprehensive Molecular Characterization of Human colon and Rectal Cancer, Nature, 487, 7407, pp. 330-337, (2012); Cedro-Tanda A., Rios-Romero M., Romero-Cordo…	K. Zhou; The Affiliated Cancer Hospital of Xiangya School of Medicine, Central South University, Hunan Cancer Hospital, Changsha, China; email: kunyan.zhou412@gmail.com	Frontiers Media S.A.	16648021			English	Front. Genet.	Article	All Open Access; Gold Open Access; Green Open Access	Scopus	2-s2.0-85116344949
Chen X.; Zhu S.; Li H.-D.; Wang J.-N.; Sun L.-J.; Xu J.-J.; Hui Y.-R.; Li X.-F.; Li L.-Y.; Zhao Y.-X.; Suo X.-G.; Xu C.-H.; Ji M.-L.; Sun Y.-Y.; Huang C.; Meng X.-M.; Zhang L.; Lv X.-W.; Ye D.-Q.; Li J.	Chen, Xin (57215214481); Zhu, Sai (57210746948); Li, Hai-Di (57190291356); Wang, Jia-Nan (57201364625); Sun, Li-Jiao (57795183000); Xu, Jin-Jin (57223420066); Hui, Ya-Ru (58497843000); Li, Xiao-Feng (55866344200); Li, Liang-Yun (57202782221); Zhao, Yu-Xin (57193889182); Suo, Xiao-Guo (57222814858); Xu, Chuan-Hui (57577260000); Ji, Ming-Lu (57780880600); Sun, Ying-Yin (57141076600); Huang, Cheng (…	57215214481; 57210746948; 57190291356; 57201364625; 57795183000; 57223420066; 58497843000; 55866344200; 57202782221; 57193889182; 57222814858; 57577260000; 57780880600; 57141076600; 36077020900; 36544115700; 36521856400; 13008847300; 56156994300; 57842134800	N6-methyladenosine-modified circIRF2, identified by YTHDF2, suppresses liver fibrosis via facilitating FOXO3 nuclear translocation	2023	International Journal of Biological Macromolecules	10.1016/j.ijbiomac.2023.125811	https://www.scopus.com/inward/record.uri?eid=2-s2.0-85165389125&doi=10.1016%2fj.ijbiomac.2023.125811&partnerID=40&md5=91deac58305848d43236758a6fc1b786	Inflammation and Immune Mediated Diseases Laboratory of Anhui Province, Anhui Institute of Innovative Drugs, School of Pharmacy, Anhui Medical University, Hefei, 230032, China; The Key Laboratory of Anti-inflammatory and Immune Medicines, Anhui Medical University, Ministry of Education, Hefei, 230032, China; Institute for Liver Diseases of Anhui Medical University, ILD-AMU, Anhui Medical Universi…	Circular RNA (circRNA) has been implicated in liver fibrosis and modulated by multiple elusive molecular mechanisms, while the effects of N6-methyladenosine (m6A) modification on circRNA are still elusive. Herein, we identify circIRF2 from our circRNA sequencing data, which decreased in liver fibrogenesis stage and restored in resolution stage, indicating that dysregulated circIRF2 may be closely…	circIRF2; circRNAs; FOXO3; Liver fibrosis; m<sup>6</sup>A; YTHDF2	Animals; Forkhead Box Protein O3; Hepatic Stellate Cells; Humans; Liver Cirrhosis; Mice; MicroRNAs; RNA, Circular; RNA-Binding Proteins; Transcription Factors; Cell proliferation; 6 n methyladenosine; interferon regulatory factor 2; microRNA 29b; RNA binding protein; transcription factor FKHRL1; unclassified drug; YTH domain family protein 2; circular ribonucleic acid; FOXO3 protein, human; micro…	Xu M., Xu H.H., Lin Y., Sun X., Wang L.J., Fang Z.P., Su X.H., Liang X.J., Hu Y., Liu Z.M., Cheng Y., Wei Y., Li J., Li L., Liu H.J., Cheng Z., Tang N., Peng C., Li T., Liu T., Qiao L., Wu D., Ding Y.Q., Zhou W.J., LECT2, a ligand for Tie1, plays a crucial role in liver fibrogenesis, Cell, 178, 6, pp. 1478-1492 e20, (2019); She S., Wu X., Zheng D., Pei X., Ma J., Sun Y., Zhou J., Nong L., Guo C.,…	D.-Q. Ye; Department of Epidemiology and Biostatistics, School of Public Health, Anhui Medical University, Hefei, 230032, China; email: ydq@ahmu.edu.cn; J. Li; School of Pharmacy, Anhui Medical University, Hefei, 230032, China; email: lj@ahmu.edu.cn	Elsevier B.V.	1418130	IJBMD	37467831	English	Int. J. Biol. Macromol.	Article		Scopus	2-s2.0-85165389125
Geng Q.; Cao X.; Fan D.; Gu X.; Zhang Q.; Zhang M.; Wang Z.; Deng T.; Xiao C.	Geng, Qishun (57222620451); Cao, Xiaoxue (57196422106); Fan, Danping (57188695252); Gu, Xiaofeng (56152344400); Zhang, Qian (56473020000); Zhang, Mengxiao (57374203000); Wang, Zheng (58035194600); Deng, Tingting (36166469100); Xiao, Cheng (41462096300)	57222620451; 57196422106; 57188695252; 56152344400; 56473020000; 57374203000; 58035194600; 36166469100; 41462096300	Diagnostic gene signatures and aberrant pathway activation based on m6A methylation regulators in rheumatoid arthritis	2022	Frontiers in Immunology	10.3389/fimmu.2022.1041284	https://www.scopus.com/inward/record.uri?eid=2-s2.0-85145067318&doi=10.3389%2ffimmu.2022.1041284&partnerID=40&md5=ff6361bbbc74c8f7ba4d6daadaa47791	China-Japan Friendship Hospital (Institute of Clinical Medical Sciences), Chinese Academy of Medical Sciences and Peking Union Medical College, Beijing, China; Institute of Clinical Medical Sciences, China-Japan Friendship Hospital, Beijing, China; Beijing Key Laboratory of Research of Chinese Medicine on Prevention and Treatment for Major Diseases, Experimental Research Center, China Academy of …	Purpose: Rheumatoid arthritis (RA) is a chronic autoimmune disease (AD) characterized by persistent synovial inflammation, bone erosion and progressive joint destruction. This research aimed to elucidate the potential roles and molecular mechanisms of N6-methyladenosine (m6A) methylation regulators in RA. Methods: An array of tissues from 233 RA and 126 control samples was profiled and integrated…	cell cycle; IGF2BP3; M1 macrophages; N6-methyladenosine; rheumatoid arthritis	Adenosine; Arthritis, Rheumatoid; Autoimmune Diseases; Consensus; Humans; Methylation; 6 n methyladenosine; interleukin 6; toll like receptor 2; toll like receptor 4; adenosine; animal cell; Article; autoimmune disease; cell proliferation; cell proliferation assay; cell viability assay; cytotoxicity assay; down regulation; enzyme linked immunosorbent assay; flow cytometry; G2 phase cell cycle che…	Scott D.L., Wolfe F., Huizinga T.W., Rheumatoid arthritis, Lancet, 376, 9746, (2010); Smolen J.S., Rheumatoid arthritis primer - behind the scenes, Nat Rev Dis Primers, 6, 1, (2020); Serhal L., Lwin M.N., Holroyd C., Edwards C.J., Rheumatoid arthritis in the elderly: Characteristics and treatment considerations, Autoimmun Rev, 19, 6, (2020); Xi X., Ye Q., Fan D., Cao X., Wang Q., Wang X., Et al.,…	C. Xiao; China-Japan Friendship Hospital (Institute of Clinical Medical Sciences), Chinese Academy of Medical Sciences and Peking Union Medical College, Beijing, China; email: xc2002812@126.com; T. Deng; Institute of Clinical Medical Sciences, China-Japan Friendship Hospital, Beijing, China; email: ttdeng1983@163.com	Frontiers Media S.A.	16643224		36582238	English	Front. Immunol.	Article	All Open Access; Gold Open Access; Green Open Access	Scopus	2-s2.0-85145067318
Zhou S.; Yang K.; Chen S.; Lian G.; Huang Y.; Yao H.; Zhao Y.; Huang K.; Yin D.; Lin H.; Li Y.	Zhou, Shurui (57700850500); Yang, Kege (56544882500); Chen, Shaojie (55974283200); Lian, Guoda (54956832600); Huang, Yuzhou (57210316952); Yao, Hanming (57700850400); Zhao, Yue (56724779400); Huang, Kaihong (55308843400); Yin, Dong (8424541500); Lin, Haoming (37461754400); Li, Yaqing (57160555900)	57700850500; 56544882500; 55974283200; 54956832600; 57210316952; 57700850400; 56724779400; 55308843400; 8424541500; 37461754400; 57160555900	CCL3 secreted by hepatocytes promotes the metastasis of intrahepatic cholangiocarcinoma by VIRMA-mediated N6-methyladenosine (m6A) modification	2023	Journal of Translational Medicine	10.1186/s12967-023-03897-y	https://www.scopus.com/inward/record.uri?eid=2-s2.0-85146740257&doi=10.1186%2fs12967-023-03897-y&partnerID=40&md5=64c1121c635c23c09ae69088b2afac23	Guangdong Provincial Key Laboratory of Malignant Tumor Epigenetics and Gene Regulation, Sun Yat-Sen Memorial Hospital, Sun Yat-Sen University, Guangzhou, 510120, China; Department of Gastroenterology, Sun Yat-Sen Memorial Hospital, Sun Yat-Sen University, Guangzhou, 510120, China; Medical Research Center, Sun Yat-Sen Memorial Hospital, Sun Yat-Sen University, Guangzhou, 510120, China; Department …	Background: Intrahepatic cholangiocarcinoma (ICC) is a malignant disease characterized by onset occult, rapid progression, high relapse rate, and high mortality. However, data on how the tumor microenvironment (TME) regulates ICC metastasis at the transcriptomic level remains unclear. This study aimed to explore the mechanisms and interactions between hepatocytes and ICC cells. Methods: We analyz…	Intrahepatic cholangiocarcinoma; m<sup>6</sup>A methylation; Metastasis; Tumor microenvironment; Vir-like m<sup>6</sup>A methyltransferase associated	Bile Duct Neoplasms; Bile Ducts, Intrahepatic; Cell Line, Tumor; Cholangiocarcinoma; Cytokines; Hepatocytes; Humans; Neoplasm Recurrence, Local; Prognosis; Sirtuin 1; Tumor Microenvironment; 6 n methyladenosine; cyclin D1; macrophage inflammatory protein 1alpha; methyltransferase; nerve cell adhesion molecule; sirtuin 1; unclassified drug; uvomorulin; vasculotropin; vimentin; vir like 6 n methyla…	Razumilava N., Gores G.J., Cholangiocarcinoma, Lancet, 383, pp. 2168-2179, (2014); Rizvi S., Khan S.A., Hallemeier C.L., Kelley R.K., Gores G.J., Cholangiocarcinoma-evolving concepts and therapeutic strategies, Nat Rev Clin Oncol, 15, pp. 95-111, (2018); Banales J.M., Et al., Cholangiocarcinoma 2020: the next horizon in mechanisms and management, Nat Rev Gastroenterol Hepatol, 17, pp. 557-588, (2…	D. Yin; Medical Research Center, Sun Yat-Sen Memorial Hospital, Sun Yat-Sen University, Guangzhou, 510120, China; email: Yind3@mail.sysu.edu.cn; H. Lin; Department of Pancreato-Biliary Surgery, Sun Yat-Sen Memorial Hospital, Sun Yat-Sen University, Guangzhou, 510120, China; email: linhaom@mail.sysu.edu.cn; Y. Li; Department of Gastroenterology, Sun Yat-Sen Memorial Hospital, Sun Yat-Sen Universit…	BioMed Central Ltd	14795876		36691046	English	J. Transl. Med.	Article	All Open Access; Gold Open Access	Scopus	2-s2.0-85146740257
Luo Y.; Zhang Z.; Zheng B.; Wu P.; Zhang G.; Wang L.; Zeng Q.; Yang Z.; Xue L.; Zeng H.; Tan F.; Xue Q.; Gao S.; Sun N.; He J.	Luo, Yuejun (57215876018); Zhang, Zhihui (55721848400); Zheng, Bo (55965272800); Wu, Peng (57212926709); Zhang, Guochao (57202501376); Wang, Lide (57221474182); Zeng, Qingpeng (57215873363); Yang, Zhaoyang (57218772539); Xue, Liyan (7201872047); Zeng, Hua (57271173500); Tan, Fengwei (23135544600); Xue, Qi (36994958900); Gao, Shugeng (7403257786); Sun, Nan (55509085500); He, Jie (57209705058)	57215876018; 55721848400; 55965272800; 57212926709; 57202501376; 57221474182; 57215873363; 57218772539; 7201872047; 57271173500; 23135544600; 36994958900; 7403257786; 55509085500; 57209705058	Comprehensive analyses of N6-methyladenosine-related long noncoding RNA profiles with prognosis, chemotherapy response, and immune landscape in small cell lung cancer	2022	Cancer Science	10.1111/cas.15553	https://www.scopus.com/inward/record.uri?eid=2-s2.0-85137852330&doi=10.1111%2fcas.15553&partnerID=40&md5=355f226903da08bc34c903f87b213429	Department of Thoracic Surgery, National Cancer Center/National Clinical Research Center for Cancer/Cancer Hospital, Chinese Academy of Medical Sciences and Peking Union Medical College, Beijing, China; State Key Laboratory of Molecular Oncology, National Cancer Center/National Clinical Research Center for Cancer/Cancer Hospital, Chinese Academy of Medical Sciences and Peking Union Medical Colleg…	Small cell lung cancer (SCLC) is the most devastating subtype of lung cancer with no clinically available prognostic biomarkers. N6-methyladenosine (m6A) and noncoding RNAs play critical roles in cancer development and treatment response. However, little is known about m6A-related long noncoding RNAs (lncRNAs) in SCLC. We used 206 limited-stage SCLC (LS-SCLC) samples from two cohorts to undertake…	immune response; individualized medicine; lncRNA; N<sup>6</sup>-methyladenosine; small cell lung cancer	6 n methyladenosine; immune checkpoint protein; immunoglobulin enhancer binding protein; long untranslated RNA; major histocompatibility antigen class 2; tumor necrosis factor; adult; antigen presentation; Article; cancer chemotherapy; cancer patient; cancer prognosis; cancer staging; classifier; clinical feature; cohort analysis; controlled study; cytokine production; female; follow up; high ris…	Gazdar A.F., Minna J.D., Developing new, rational therapies for recalcitrant small cell lung cancer, J Natl Cancer Inst, 108, 10, (2016); van Meerbeeck J.P., Fennell D.A., De Ruysscher D.K., Small-cell lung cancer, Lancet (London, England), 378, 9804, pp. 1741-1755, (2011); Nicholson A.G., Chansky K., Crowley J., Et al., The International Association for the Study of Lung Cancer Lung Cancer Stagi…	N. Sun; Department of Thoracic Surgery, National Cancer Center, National Clinical Research Center for Cancer, Cancer Hospital, Chinese Academy of Medical Sciences, Peking Union Medical College, Beijing, 100021, China; email: sunnan@vip.126.com; J. He; Department of Thoracic Surgery, National Cancer Center/National Clinical Research Center for Cancer/Cancer Hospital, Chinese Academy of Medical Sci…	John Wiley and Sons Inc	13479032	CSACC	36047973	English	Cancer Sci.	Article	All Open Access; Gold Open Access	Scopus	2-s2.0-85137852330
Yi Y.-C.; Chen X.-Y.; Zhang J.; Zhu J.-S.	Yi, You-Cai (57218484633); Chen, Xiao-Yu (16554270500); Zhang, Jing (57216533928); Zhu, Jin-Shui (35244134400)	57218484633; 16554270500; 57216533928; 35244134400	Novel insights into the interplay between m6A modification and noncoding RNAs in cancer	2020	Molecular Cancer	10.1186/s12943-020-01233-2	https://www.scopus.com/inward/record.uri?eid=2-s2.0-85089301697&doi=10.1186%2fs12943-020-01233-2&partnerID=40&md5=d43ca6a21964f3decc20ab7b24a92826	Department of Gastroenterology, Shanghai Jiao Tong University, Affiliated Sixth People's Hospital, No. 600 Yishan Road, Shanghai, 200233, China	N6-methyladenosine (m6A) is one of the most common RNA modifications in eukaryotes, mainly in messenger RNA (mRNA). Increasing evidence shows that m6A methylation modification acts an essential role in various physiological and pathological bioprocesses. Noncoding RNAs (ncRNAs), including miRNAs, lncRNAs and circRNAs, are known to participate in regulating cell differentiation, angiogenesis, immu…	Cancer; m<sup>6</sup>A RNA methylation; Noncoding RNAs	Adenosine; Animals; Carcinogenesis; Disease Susceptibility; Drug Resistance, Neoplasm; Gene Expression Regulation, Neoplastic; Humans; Methylation; MicroRNAs; Neoplasms; RNA Interference; RNA, Circular; RNA, Long Noncoding; RNA, Messenger; RNA, Untranslated; 6 n methyladenosine; alkylated DNA repair protein alkB homolog 5; alpha interferon; beta interferon; circular ribonucleic acid; fibroblast g…	Boccaletto P., Machnicka M.A., Purta E., Piatkowski P., Baginski B., Wirecki T.K., Et al., MODOMICS: A database of RNA modification pathways. 2017 update, Nucleic Acids Res, 46, pp. D303-D307, (2018); Ping X.-L., Sun B.-F., Wang L., Xiao W., Yang X., Wang W.-J., Et al., Mammalian WTAP is a regulatory subunit of the RNA N6-methyladenosine methyltransferase, Cell Res, 24, pp. 177-189, (2014); Domin…	J. Zhang; Department of Gastroenterology, Shanghai Jiao Tong University, Affiliated Sixth People's Hospital, Shanghai, No. 600 Yishan Road, 200233, China; email: jing5522724@vip.163.com; J.-S. Zhu; Department of Gastroenterology, Shanghai Jiao Tong University, Affiliated Sixth People's Hospital, Shanghai, No. 600 Yishan Road, 200233, China; email: zhujs1803@163.com	BioMed Central Ltd	14764598	MCOAC	32767982	English	Mol. Cancer	Review	All Open Access; Gold Open Access	Scopus	2-s2.0-85089301697
Zhang L.; Dou X.; Zheng Z.; Ye C.; Lu T.X.; Liang H.L.; Wang L.; Weichselbaum R.R.; He C.	Zhang, Linda (57209286890); Dou, Xiaoyang (57216660776); Zheng, Zhong (58158711500); Ye, Chang (57205155875); Lu, Thomas X (59036685800); Liang, Hua L (57222166011); Wang, Liangliang (57193502563); Weichselbaum, Ralph R (35403900900); He, Chuan (25937283000)	57209286890; 57216660776; 58158711500; 57205155875; 59036685800; 57222166011; 57193502563; 35403900900; 25937283000	YTHDF2/m6A/NF-κB axis controls anti-tumor immunity by regulating intratumoral Tregs	2023	EMBO Journal	10.15252/embj.2022113126	https://www.scopus.com/inward/record.uri?eid=2-s2.0-85162946038&doi=10.15252%2fembj.2022113126&partnerID=40&md5=a323dcf4116b7d96210881d7b42e794f	Department of Chemistry, The University of Chicago, Chicago, IL, United States; Department of Biochemistry and Molecular Biology, The University of Chicago, Chicago, IL, United States; Institute for Biophysical Dynamics, The University of Chicago, Chicago, IL, United States; Howard Hughes Medical Institute, University of Chicago, Chicago, IL, United States; Department of Radiation and Cellular On…	N6-methyladenosine (m6A) in messenger RNA (mRNA) regulates immune cells in homeostasis and in response to infection and inflammation. The function of the m6A reader YTHDF2 in the tumor microenvironment (TME) in these contexts has not been explored. We discovered that the loss of YTHDF2 in regulatory T (Treg) cells reduces tumor growth in mice. Deletion of Ythdf2 in Tregs does not affect periphera…	Anti-tumor immunity; Intratumoral Tregs; m<sup>6</sup>A; NF-κB regulation; YTHDF2	Animals; Immunotherapy; Inflammation; Mice; Neoplasms; NF-kappa B; Signal Transduction; Tumor Microenvironment; 6 n methyladenosine; cell protein; immunoglobulin enhancer binding protein; tumor necrosis factor; unclassified drug; YTHDF2 protein; immunoglobulin enhancer binding protein; adult; animal cell; animal experiment; animal model; animal tissue; antineoplastic activity; apoptosis; Article;…	Anders S., Pyl P.T., Huber W., HTSeq-A python framework to work with high-throughput sequencing data, Bioinformatics, 31, pp. 166-169, (2015); Ashall L., Horton C.A., Nelson D.E., Paszek P., Harper C.V., Sillitoe K., Ryan S., Spiller D.G., Unitt J.F., Broomhead D.S., Et al., Pulsatile stimulation determines timing and specificity of NF-κB-dependent transcription, Science, 324, pp. 242-246, (2009)…	C. He; Department of Chemistry, The University of Chicago, Chicago, United States; email: chuanhe@uchicago.edu	John Wiley and Sons Inc	2614189	EMJOD	37345898	English	EMBO J.	Article		Scopus	2-s2.0-85162946038
Castellanos-Rubio A.; Santin I.; Olazagoitia-Garmendia A.; Romero-Garmendia I.; Jauregi-Miguel A.; Legarda M.; Bilbao J.R.	Castellanos-Rubio, Ainara (16033138500); Santin, Izortze (16680284800); Olazagoitia-Garmendia, Ane (57203408574); Romero-Garmendia, Irati (56426488900); Jauregi-Miguel, Amaia (55514842900); Legarda, Maria (26531230000); Bilbao, Jose Ramon (57195616574)	16033138500; 16680284800; 57203408574; 56426488900; 55514842900; 26531230000; 57195616574	A novel RT-QPCR-based assay for the relative quantification of residue specific m6A RNA methylation	2019	Scientific Reports	10.1038/s41598-019-40018-6	https://www.scopus.com/inward/record.uri?eid=2-s2.0-85062876365&doi=10.1038%2fs41598-019-40018-6&partnerID=40&md5=918374b13acd1f9db8d15740fadc6280	Department of Genetics, Physical Anthropology and Animal Physiology, University of the Basque Country (UPV-EHU), Biocruces-Bizkaia Health Research Institute, Leioa, Spain; IKERBASQUE, Basque Foundation for Science, Bilbao, Spain; Department of Biochemistry and Molecular Biology, University of the Basque Country (UPV-EHU), Endocrinology and Diabetes Research Group, Biocruces-Bizkaia Health Researc…	N6-methyladenosine (m6A) is the most common and abundant RNA modification. Recent studies have shown its importance in the regulation of several biological processes, including the immune response, and different approaches have been developed in order to map and quantify m6A marks. However, site specific detection of m6A methylation has been technically challenging, and existing protocols are lon…		3' Untranslated Regions; Adenosine; Caco-2 Cells; Deoxyribonuclease BamHI; Humans; Methylation; Nucleotide Motifs; Real-Time Polymerase Chain Reaction; Reverse Transcriptase Polymerase Chain Reaction; Suppressor of Cytokine Signaling 1 Protein; Suppressor of Cytokine Signaling 3 Protein; adenosine; N(6)-methyladenosine; SOCS1 protein, human; SOCS3 protein, human; suppressor of cytokine signaling …	Fu Y., Dominissini D., Rechavi G., He C., Gene expression regulation mediated through reversible m(6)A RNA methylation, Nat Rev Genet., 15, pp. 293-306, (2014); Maity A., Das B., N6-methyladenosine modification in mRNA: machinery, function and implications for health and diseases, FEBS J., 283, pp. 1607-1630, (2016); Yue Y., Liu J., He C., RNA N6-methyladenosine methylation in post-transcriptiona…	A. Castellanos-Rubio; Department of Genetics, Physical Anthropology and Animal Physiology, University of the Basque Country (UPV-EHU), Biocruces-Bizkaia Health Research Institute, Leioa, Spain; email: ainara.castellanos@ehu.eus	Nature Publishing Group	20452322		30862814	English	Sci. Rep.	Article	All Open Access; Gold Open Access	Scopus	2-s2.0-85062876365
Liu Q.; Li M.; Jiang L.; Jiang R.; Fu B.	Liu, Qingbai (57203747273); Li, Meng (57204198771); Jiang, Lei (57209617811); Jiang, Rui (58345300000); Fu, Bin (57203019157)	57203747273; 57204198771; 57209617811; 58345300000; 57203019157	METTL3 promotes experimental osteoarthritis development by regulating inflammatory response and apoptosis in chondrocyte	2019	Biochemical and Biophysical Research Communications	10.1016/j.bbrc.2019.05.168	https://www.scopus.com/inward/record.uri?eid=2-s2.0-85068258322&doi=10.1016%2fj.bbrc.2019.05.168&partnerID=40&md5=948c1de1ecb3e0321cee3b32b919607d	Department of Orthopaedics, The Affiliated Lianshui County People's Hospital of Kangda College of Nan Jing Medical Universty, Huai'an, 223400, Jiangsu, China; Department of Orthopaedics, The First Affiliated Hospital of Soochow University, Suzhou, 215000, Jiangsu, China; Orthopedic Institute, Medical College, Soochow University, Suzhou, 215000, Jiangsu, China; Department of Orthopedics, Wujin Peo…	Objective: This study was to investigate the functional role of RNA methyltransferase METTL3, an enzyme catalyzes the formation of N6-methyladenosine (m6A) on the target mRNA, in the development of osteoarthritis (OA) and the underlying mechanism. Methods: Cytokine IL-1β was used to stimulate the chondroprogenitor cell line ATDC5 cells to mimic the inflammatory condition in vitro. The level of ME…	Chondrocytes; METTL3; N6-methyladenosine (m6A); NF-κB; Osteoarthritis	Animals; Apoptosis; Cell Line; Chondrocytes; Inflammation; Methyltransferases; Mice; Mice, Inbred C57BL; NF-kappa B; Osteoarthritis; 6 n methyladenosine; aggrecan; betaine; collagen type 10; collagen type 2; collagenase; collagenase 3; cycloleucine; immunoglobulin enhancer binding protein; interleukin 1beta; messenger RNA; RNA methyltransferase; RNA methyltransferase METTL3; short hairpin RNA; un…	Parkinson L., Waters D.L., Franck L., Systematic review of the impact of osteoarthritis on health outcomes for comorbid disease in older people, Osteoarthritis Cartilage, 25, 11, pp. 1751-1770, (2017); Allen K.D., Golightly Y.M., State of the evidence, Curr. Opin. Rheumatol., 27, 3, pp. 276-283, (2015); Zhao W., Et al., Cartilage degeneration and excessive subchondral bone formation in spontaneou…	B. Fu; Department of Orthopedics, Wujin People's Hospital, Changzhou, No.2 of Yongning North Road, 213000, China; email: fubin_happy@163.com	Elsevier B.V.	0006291X	BBRCA	31186141	English	Biochem. Biophys. Res. Commun.	Article		Scopus	2-s2.0-85068258322
Wang Y.; Mao J.; Wang X.; Lin Y.; Hou G.; Zhu J.; Xie B.	Wang, Yiqin (57202784871); Mao, Jian (57209464325); Wang, Xin (57192721409); Lin, Yong (57209477788); Hou, Guoqiang (56085239800); Zhu, Jun (57198764017); Xie, Baoshu (56208877900)	57202784871; 57209464325; 57192721409; 57209477788; 56085239800; 57198764017; 56208877900	Genome-wide screening of altered m6A-tagged transcript profiles in the hippocampus after traumatic brain injury in mice	2019	Epigenomics	10.2217/epi-2019-0002	https://www.scopus.com/inward/record.uri?eid=2-s2.0-85067876267&doi=10.2217%2fepi-2019-0002&partnerID=40&md5=b2f122bca6aecb9f41cceb0abf40dbc7	CNRS-LIA Hematology and Cancer, Sino-French Research Center for Life Sciences and Genomics, State Key Laboratory of Medical Genomics, Rui-Jin Hospital, Shanghai Jiao Tong University School of Medicine, Shanghai, 200127, China; Department of Neurosurgery, Ren Ji Hospital, School of Medicine, Shanghai Jiao Tong University, Shanghai, 200127, China; Department of Anesthesiology, Ren Ji Hospital, Scho…	Aim: To systematically profile RNA m6A modification landscape after traumatic brain injury (TBI) in mice. Materials & methods: Expression of m6A-related genes was detected by quantitative real-time PCR (qPCR). Expression and location of METTL3, a key component of m6A methyltransferase complex, were determined by immunostaining. Genome-wide profiling of m6A-tagged transcripts was conducted by m6A-…	hippocampus; N6-methyladenosine (m6A); traumatic brain injury (TBI)	Adenosine; Animals; Brain Injuries, Traumatic; DNA Methylation; Down-Regulation; Genome-Wide Association Study; Hippocampus; Male; Methyltransferases; Mice; Mice, Inbred C57BL; RNA, Messenger; Up-Regulation; 6 n methyladenosine; activating transcription factor 3; alkylated DNA repair protein alkB homolog 5; beta actin; calgranulin B; carbon tetrachloride; CD14 antigen; dsp protein; fto protein; g…	Brazinova A., Rehorcikova V., Taylor M.S., Et al., Epidemiology of traumatic brain injury in Europe: A living systematic review, J. Neurotrauma, (2016); Majdan M., Plancikova D., Maas A., Et al., Years of life lost due to traumatic brain injury in Europe: A cross-sectional analysis of 16 countries, PLoS Med., 14, 7, (2017); Evans L.P., Newell E.A., Mahajan M., Et al., Acute vitreoretinal trauma a…	J. Zhu; CNRS-LIA Hematology and Cancer, Sino-French Research Center for Life Sciences and Genomics, State Key Laboratory of Medical Genomics, Rui-Jin Hospital, Shanghai Jiao Tong University School of Medicine, Shanghai, 200127, China; email: zhuj1966@yahoo.com	Future Medicine Ltd.	17501911		30882247	English	Epigenomics	Article		Scopus	2-s2.0-85067876267
Ning J.; Du H.; Zhang Y.; Liu Q.; Jiang T.; Pang Y.; Tian X.; Yan L.; Niu Y.; Zhang R.	Ning, Jie (57210217415); Du, Hairong (57436620500); Zhang, Yaling (57225165880); Liu, Qingping (55712205200); Jiang, Tao (7402148554); Pang, Yaxian (57210220471); Tian, Xiaochen (57436606800); Yan, Liqun (57436676500); Niu, Yujie (7202225368); Zhang, Rong (55612030400)	57210217415; 57436620500; 57225165880; 55712205200; 7402148554; 57210220471; 57436606800; 57436676500; 7202225368; 55612030400	N6-Methyladenosine Modification of CDH1 mRNA Promotes PM2.5-Induced Pulmonary Fibrosis via Mediating Epithelial Mesenchymal Transition	2022	Toxicological Sciences	10.1093/toxsci/kfab133	https://www.scopus.com/inward/record.uri?eid=2-s2.0-85123901239&doi=10.1093%2ftoxsci%2fkfab133&partnerID=40&md5=4cd5e3dba0261f9debc76af686813ad9	Department of Toxicology, School of Public Health, Hebei Medical University, Shijiazhuang, 050017, China; Department of Communicable Disease Prevention and Control, Guangming District Center for Disease Control and Prevention, Guangdong, Shenzhen, 518016, China; Department of Orthopaedic Surgery, Shijiazhuang People's Hospital, Shijiazhuang, 050011, China; Departments of Radiology, Second Hospita…	The association between ambient airborne fine particulate matter (PM2.5) exposure and respiratory diseases has been investigated in epidemiological studies. To explore the potential mechanism of PM2.5-induced pulmonary fibrosis, 60 mice were divided into 3 groups to expose to different levels of PM2.5 for 8 and 16 weeks: filtered air, unfiltered air, and concentrated PM2.5 air, respectively. BEAS…	epithelial-mesenchymal transition; m6A RNA methylation; METTL3; PM<sub>2.5</sub>; pulmonary fibrosis; YTHDF2	Adenosine; Animals; Cadherins; Epithelial-Mesenchymal Transition; Mice; Particulate Matter; Pulmonary Fibrosis; RNA, Messenger; 6 n methyladenosine; alpha smooth muscle actin; carbon monoxide; messenger RNA; mettl3 protein; microRNA; nerve cell adhesion molecule; nitric oxide; ozone; protein; small interfering RNA; sulfur dioxide; unclassified drug; uvomorulin; vimentin; adenosine; cadherin; mess…	Burney P., Amaral A. F. S., Air pollution and chronic airway disease: Is the evidence always clear, The Lancet, 394, pp. 2198-2200, (2019); Chen M., Zhou H., Xu Y., Qiu L., Hu Z., Qin X., Chen S., Zhang Y., Cao Q., Abu-Amer Y., Et al., From the cover: Lungspecific overexpression of constitutively active IKK2 induces pulmonary and systemic inflammations but not hypothalamic inflammation and glucos…	R. Zhang; Department of Toxicology, School of Public Health, Hebei Medical University, Shijiazhuang, 050017, China; email: rongzhang@hebmu.edu.cn	Oxford University Press	10966080	TOSCF	34735003	English	Toxicol. Sci.	Article		Scopus	2-s2.0-85123901239
Fu M.; Zhou B.; Shi N.; Dong R.; Chen Y.	Fu, Manni (57369435700); Zhou, Bei (58548301000); Shi, Nian (56599937300); Dong, Rongjing (57207259386); Chen, Yongjun (56600919100)	57369435700; 58548301000; 56599937300; 57207259386; 56600919100	RBM15-Mediated m6A Modification of K17 Affects Keratinocytes Response to IL-17A Stimulation in Psoriasis	2023	Annals of Clinical and Laboratory Science		https://www.scopus.com/inward/record.uri?eid=2-s2.0-85168752233&partnerID=40&md5=fa9efdee04b4838f0fd14a6edadc7ec5	Department of Dermatology, Huangshi Central Hospital, Affiliated Hospital of Hubei Polytechnic University, Hubei, Huangshi, China	Objective. Psoriasis is characterized by excessive proliferation and abnormal differentiation of epidermal keratinocytes. This study aimed to reveal the function and mechanism of a N6-methyladenosine (m6A) methyltransferase RNA-binding motif protein 15 (RBM15) in IL-17A-induced keratinocytes. Methods. A immortalized keratinocyte cell line HaCaT was used to undergo the IL-17A stimulation. The mRNA…	IL-17A; K17; keratinocyte; psoriasis; RBM15	Humans; Inflammation; Interleukin-17; Keratin-17; Keratinocytes; Psoriasis; RNA, Messenger; RNA-Binding Proteins; 6 n methyladenosine; cytokeratin 17; edoxudine; interleukin 17; interleukin 8; messenger RNA; methyltransferase; RNA binding motif protein 15; RNA binding protein; small interfering RNA; tumor necrosis factor; unclassified drug; cytokeratin 17; interleukin 17; messenger RNA; RBM15 pro…	Michalek I.M., Loring B., John S.M., A systematic review of worldwide epidemiology of psoriasis, J Eur Acad Dermatol Venereol, 31, 2, pp. 205-212, (2017); Li J., Yu P., Genome-wide transcriptome analysis identifies alternative splicing regulatory network and key splicing factors in mouse and human psoriasis, Sci Rep, 8, 1, (2018); Kamiya K., Kishimoto M., Sugai J., Komine M., Ohtsuki M., Risk Fac…	Y. Chen; Department of dermatology, Huangshi Central Hospital, Affiliated Hospital of Hubei Polytechnic University, Huangshi, No.141, Tianjin Road, Hubei, 435000, China; email: chenyongjun@hbpu.edu.cn	Association of Clinical Scientists	917370	ACLSC	37625827	English	Ann. Clin. Lab. Sci.	Article		Scopus	2-s2.0-85168752233
Bechara R.; Amatya N.; Bailey R.D.; Li Y.; Aggor F.E.Y.; Li D.-D.; Jawale C.V.; Coleman B.M.; Dai N.; Gokhale N.S.; Taylor T.C.; Horner S.M.; Poholek A.C.; Bansal A.; Biswas P.S.; Gaffen S.L.	Bechara, Rami (57194796650); Amatya, Nilesh (55654070300); Bailey, Rachel D (57217063638); Li, Yang (57222024526); Aggor, Felix E. Y. (57202927716); Li, De-Dong (36166842400); Jawale, Chetan V (36504183900); Coleman, Bianca M (56622400500); Dai, Ning (57195611974); Gokhale, Nandan S (56367828800); Taylor, Tiffany C (57225143693); Horner, Stacy M (35867083400); Poholek, Amanda C (10640428000); Ban…	57194796650; 55654070300; 57217063638; 57222024526; 57202927716; 36166842400; 36504183900; 56622400500; 57195611974; 56367828800; 57225143693; 35867083400; 10640428000; 59048175500; 7202443643; 6602496240	The m6A reader IMP2 directs autoimmune inflammation through an IL-17 and TNFα-dependent C/EBP transcription factor axis	2021	Science Immunology	10.1126/sciimmunol.abd1287	https://www.scopus.com/inward/record.uri?eid=2-s2.0-85109294400&doi=10.1126%2fsciimmunol.abd1287&partnerID=40&md5=465ba2f10a0ba0994834eb9ab9f15b68	Division of Rheumatology and Clinical Immunology, University of Pittsburgh, Pittsburgh, PA, United States; Diabetes Unit, Massachusetts General Hospital, Boston, MA, United States; Department of Molecular Genetics and Microbiology, Duke University Medical Center, Durham, NC, United States; Department of Medicine, Duke University Medical Center, Durham, NC, United States; Division of Pediatrics, U…	Excessive cytokine activity underlies many autoimmune conditions, particularly through the interleukin-17 (IL-17) and tumor necrosis factor α (TNFα) signaling axis. Both cytokines activate nuclear factor B, but appropriate induction of downstream effector genes requires coordinated activation of other transcription factors, notably, CCAAT/enhancer binding proteins (C/EBPs). Here, we demonstrate t…		Adenosine; Animals; Autoimmunity; CCAAT-Enhancer-Binding Proteins; Cell Line; Female; Humans; Inflammation; Interleukin-17; Male; Mice, Inbred C57BL; Mice, Knockout; RNA-Binding Proteins; Tumor Necrosis Factor-alpha; 6 n methyladenosine; autoantibody; CCAAT enhancer binding protein beta; CCAAT enhancer binding protein delta; interleukin 17; interleukin 17F; protein IMP2; somatomedin binding prote…	Helmick C. G., Felson D. T., Lawrence R. C., Gabriel S., Hirsch R., Kwoh C. K., Liang M. H., Kremers H. M., Mayes M. D., Merkel P. A., Pillemer S. R., Reveille J. D., Stone J. H., National Arthritis Data Workgroup, Estimates of the prevalence of arthritis and other rheumatic conditions in the United States. Part I, Arthritis Rheum, 58, (2008); American College of Rheumatology, (2012); McGeachy M.…	S.L. Gaffen; Division of Rheumatology and Clinical Immunology, University of Pittsburgh, Pittsburgh, United States; email: sarah.gaffen@pitt.edu	American Association for the Advancement of Science	24709468		34215679	English	Sci. Immunol.	Article	All Open Access; Green Open Access	Scopus	2-s2.0-85109294400
Zhang Y.; Wang X.; Zhang C.; Yi H.	Zhang, Yanli (57214633493); Wang, Xiaocong (56622314700); Zhang, Chen (57222765515); Yi, Huanfa (36624691900)	57214633493; 56622314700; 57222765515; 36624691900	The dysregulation of lncRNAs by epigenetic factors in human pathologies	2023	Drug Discovery Today	10.1016/j.drudis.2023.103664	https://www.scopus.com/inward/record.uri?eid=2-s2.0-85163943886&doi=10.1016%2fj.drudis.2023.103664&partnerID=40&md5=e83eda3f5234f733d43b7a66e34680bf	Central Laboratory, The First Hospital of Jilin University, Changchun, Jilin, China; Key Laboratory of Organ Regeneration and Transplantation, Ministry of Education, Changchun, Jilin, 130021, China; Department of Echocardiography, The First Hospital of Jilin University, Changchun, Jilin, China; Colorectal and Anal Surgery, General Surgery Center, The First Hospital of Jilin University, Changchun,…	Dysregulation of long noncoding RNAs (lncRNAs) contributes to numerous human diseases, including cancers and autoimmune diseases (ADs). Given the importance of lncRNAs in disease initiation and progression, a deeper understanding of their complex regulatory network is required to facilitate their use as therapeutic targets for ADs. In this review, we summarize how lncRNAs are dysregulated in path…	autoimmune disease; epigenetic modulator; inflammation; long noncoding RNA; N6-methyladenosine	Adenosine; DNA Methylation; Epigenesis, Genetic; Humans; MicroRNAs; RNA, Long Noncoding; 6 n methyladenosine; adenosine; inosine; long untranslated RNA; microRNA; RNA binding protein; adenosine; long untranslated RNA; microRNA; alternative RNA splicing; antigenic escape; autoimmune disease; DNA methylation; epigenetics; exosome; gene expression; histone modification; human; immune response; innat…	Bhan A., Mandal S.S., LncRNA HOTAIR: A master regulator of chromatin dynamics and cancer, BBA, 1856, pp. 151-164, (2015); Bhan A., Soleimani M., Mandal S.S., Long noncoding RNA and cancer: A new paradigm, Cancer Res, 77, pp. 3965-3981, (2017); Lodde V., Murgia G., Simula E.R., Steri M., Floris M., Idda M.L., Long noncoding RNAs and circular RNAs in autoimmune diseases, Biomolecules, 10, (2020); O…	H. Yi; Central Laboratory, The First Hospital of Jilin University, Changchun, Jilin, China; email: yihuanfa@jlu.edu.cn	Elsevier Ltd	13596446	DDTOF	37348827	English	Drug Discov. Today	Review		Scopus	2-s2.0-85163943886
Liu T.; Zhuang X.X.; Qin X.J.; Wei L.B.; Gao J.R.	Liu, Tao (56673201300); Zhuang, Xing Xing (56489634600); Qin, Xiu Juan (57155645000); Wei, Liang Bing (56067392800); Gao, Jia Rong (55622972600)	56673201300; 56489634600; 57155645000; 56067392800; 55622972600	Alteration of N6-methyladenosine epitranscriptome profile in lipopolysaccharide-induced mouse mesangial cells	2022	Naunyn-Schmiedeberg's Archives of Pharmacology	10.1007/s00210-022-02208-4	https://www.scopus.com/inward/record.uri?eid=2-s2.0-85124326509&doi=10.1007%2fs00210-022-02208-4&partnerID=40&md5=2a161935379c7971c4e4d763c567755a	Department of Pharmacy, The First Affiliated Hospital of Anhui University of Chinese Medicine, Anhui, Hefei, 230012, China; College of Pharmacy, Anhui University of Chinese Medicine, Anhui, Hefei, 230011, China; Department of Pharmacy, Chaohu Hospital of Anhui Medical University, Anhui, Chaohu, 238000, China; Anhui Province Key Laboratory of Chinese Medicinal Formula, Anhui, Hefei, 230031, China	N6-Methyladenosine (m6A) is the most prevalent internal modification of messenger RNA (mRNA) in eukaryotes. The underlying molecular mechanisms of m6A modification in chronic glomerulonephritis (CGN) remain unexplored. Here, we performed methylated RNA immunoprecipitation sequencing (MeRIP-seq) and RNA sequencing (RNA-seq) analyses to assess the alterations of epitranscriptome-wide m6A profile in…	Chronic glomerulonephritics; m6A methylation; m6A-seq; MMC cells; RNA-seq	Adenosine; Animals; Immunoprecipitation; Lipopolysaccharides; Mesangial Cells; Mice; 6 n methyladenosine; alpha 1 microglobulin bikunin; complement; fibrinogen gamma chain; fibroblast growth factor 22; fibroblast growth factor receptor 3; fos like antigen 1; lipopolysaccharide; mucin 6; myosin light polypeptide kinase; neural precursor cell expressed developmentally downregulated gene 9; peroxiso…	Chen T., Hao Y.-J., Zhang Y., Li M.-M., Wang M., Han W., Wu Y., Lv Y., Hao J., Wang L., Et al., m6A RNA methylation is regulated by MicroRNAs and promotes reprogramming to pluripotency, Cell Stem Cell, 16, pp. 289-301, (2015); Dominissini D., Moshitch-Moshkovitz S., Schwartz S., Et al., Topology of the human and mouse m6A RNA methylomes revealed by m6A-seq, Nature, 485, 7397, pp. 201-206, (2012);…	J.R. Gao; Department of Pharmacy, The First Affiliated Hospital of Anhui University of Chinese Medicine, Hefei, Anhui, 230012, China; email: 2020205219007@stu.ahtcm.edu.cn	Springer Science and Business Media Deutschland GmbH	281298	NSAPC	35119478	English	Naunyn-Schmiedeberg's Arch. Pharmacol.	Article		Scopus	2-s2.0-85124326509
Cai Y.; Yu R.; Kong Y.; Feng Z.; Xu Q.	Cai, Yongjie (57455051800); Yu, Ruiqing (57207826980); Kong, Yiping (57455667600); Feng, Zhihui (57200044453); Xu, Qiong (36239393500)	57455051800; 57207826980; 57455667600; 57200044453; 36239393500	METTL3 regulates LPS-induced inflammatory response via the NOD1 signaling pathway	2022	Cellular Signalling	10.1016/j.cellsig.2022.110283	https://www.scopus.com/inward/record.uri?eid=2-s2.0-85124740290&doi=10.1016%2fj.cellsig.2022.110283&partnerID=40&md5=1ef8b48d3bd9aac08edff4f43243ecc7	Guanghua School of Stomatology, Hospital of Stomatology, Guangdong Provincial Key Laboratory of Stomatology, Sun Yat-sen University, Guangzhou, 510055, China	N6-methyladenosine (m6A) is a prevalent mRNA modification that plays a crucial function in multiple biological processes. Methyltransferase-like 3 (METTL3), an m6A methyltransferase, is essential for the m6A modification. Recently, the effect of METTL3 on the immune response has been reported. However, the effect is unclear, and the results are contradictory. In the present study, the total m6A a…	Inflammation; Macrophage; METTL3; mRNA degradation; NOD1 signaling pathway	Cytokines; Lipopolysaccharides; Methyltransferases; RNA, Messenger; Signal Transduction; 6 n methyladenosine; binding protein; caspase recruitment domain protein 15; caspase recruitment domain protein 4; cytokine; interleukin 6; lipopolysaccharide; messenger RNA; methyltransferase; methyltransferase like 3; nitric oxide; nucleotide binding oligomerization domain like receptor; receptor interactin…	Hamidzadeh K., Christensen S.M., Dalby E., Chandrasekaran P., Mosser D.M., Macrophages and the recovery from acute and chronic inflammation, Annu. Rev. Physiol., 79, pp. 567-592, (2017); Shapouri-Moghaddam A., Mohammadian S., Vazini H., Taghadosi M., Esmaeili S.A., Mardani F., Seifi B., Mohammadi A., Afshari J.T., Sahebkar A., Macrophage plasticity, polarization, and function in health and diseas…	Q. Xu; Guanghua School of Stomatology, Hospital of Stomatology, Guangdong Provincial Key Laboratory of Stomatology, Sun Yat-sen University, Guangzhou, 510055, China; email: xqiong@mail.sysu.edu.cn	Elsevier Inc.	8986568	CESIE	35176453	English	Cell. Signal.	Article		Scopus	2-s2.0-85124740290
Wu P.; Fang X.; Liu Y.; Tang Y.; Wang W.; Li X.; Fan Y.	Wu, Ping (57225958918); Fang, Xing (57196057118); Liu, Yalan (37034445700); Tang, Yaoyun (59279896900); Wang, Wei (59104622700); Li, Xin (57775614100); Fan, Yuhua (57210260289)	57225958918; 57196057118; 37034445700; 59279896900; 59104622700; 57775614100; 57210260289	N6-methyladenosine modification of circCUX1 confers radioresistance of hypopharyngeal squamous cell carcinoma through caspase1 pathway	2021	Cell Death and Disease	10.1038/s41419-021-03558-2	https://www.scopus.com/inward/record.uri?eid=2-s2.0-85102858622&doi=10.1038%2fs41419-021-03558-2&partnerID=40&md5=c5657b20239622ff0563e4809a0a2a1a	Department of Otorhinolaryngology Head & Neck Surgery; Province Key Laboratory of Otolaryngology Critical Diseases, Xiangya Hospital, Central South University, Changsha, 410008, China	Hypopharyngeal squamous cell carcinoma (HPSCC) is one of the most common malignant tumors in otolaryngology head and neck surgery and is one of the worst prognostic malignant tumors. Endogenous circular RNA (circRNA) is more stable than mRNA, microRNA (miRNA), and long non-coding RNA (LncRNA) in exosomes, plasma, and urine, and participates in gene expression regulation to perform different funct…		Adenosine; Adult; Aged; Caspase 1; Cell Line, Tumor; Homeodomain Proteins; Humans; Hypopharyngeal Neoplasms; Middle Aged; Radiation Tolerance; Repressor Proteins; RNA, Circular; Signal Transduction; Squamous Cell Carcinoma of Head and Neck; Transcription Factors; 6 n methyladenosine; antineoplastic agent; circular ribonucleic acid; dactinomycin; interleukin 1beta converting enzyme; methyltransfer…	Leemans C.R., Snijders P.J.F., Brakenhoff R.H., The molecular landscape of head and neck cancer, Nat. Rev. Cancer, 18, pp. 269-282, (2018); Marur S., Forastiere A.A., Head and neck squamous cell carcinoma: update on epidemiology, diagnosis, and treatment, Mayo Clin. Proc., 91, pp. 386-396, (2016); Specenier P., Vermorken J.B., Optimizing treatments for recurrent or metastatic head and neck squamo…	Y. Tang; Department of Otorhinolaryngology Head & Neck Surgery; Province Key Laboratory of Otolaryngology Critical Diseases, Xiangya Hospital, Central South University, Changsha, 410008, China; email: csuwoodpink@126.com	Springer Nature	20414889		33741902	English	Cell Death Dis.	Article	All Open Access; Gold Open Access	Scopus	2-s2.0-85102858622
Ghafouri-Fard S.; Shoorei H.; Hussen B.M.; Dong P.; Zhai T.; Taheri M.; Samadian M.	Ghafouri-Fard, Soudeh (55387443600); Shoorei, Hamed (57196196809); Hussen, Bashdar Mahmud (55860047600); Dong, Peixin (57201762777); Zhai, Tianyue (57188833815); Taheri, Mohammad (56370131000); Samadian, Mohammad (22941872100)	55387443600; 57196196809; 55860047600; 57201762777; 57188833815; 56370131000; 22941872100	The significance of N6-methyladenosine-modified non-coding RNAs in different disorders	2023	European Journal of Pharmacology	10.1016/j.ejphar.2023.175644	https://www.scopus.com/inward/record.uri?eid=2-s2.0-85150036290&doi=10.1016%2fj.ejphar.2023.175644&partnerID=40&md5=2992c565e055d3b3f8b0a4cf1e5f1763	Department of Medical Genetics, School of Medicine, Shahid Beheshti University of Medical Sciences, Tehran, Iran; Department of Anatomical Sciences, Faculty of Medicine, Birjand University of Medical Sciences, Birjand, Iran; Clinical Research Development Unit of Tabriz Valiasr Hospital, Tabriz University of Medical Sciences, Tabriz, Iran; Department of Pharmacognosy, College of Pharmacy, Hawler M…	N6-methyladenosine (m6A) is the most widespread endogenous modification affecting the expression of eukaryotic mRNA transcripts. Recent studies have shown that the m6A marks within non-coding RNAs can affect their functions and expression in a manner similar to that of mRNA-coding genes. Since non-coding RNAs are involved in the pathophysiology of several disorders, identification of the role of …	circRNA; lncRNA; m6A; miRNA; N6-methyladenosine; Tumor	Adenosine; Kidney; RNA, Messenger; 6 n methyladenosine; circular ribonucleic acid; cisplatin; connective tissue growth factor; corticosterone; cryopyrin; cyclin D1; DNA methyltransferase 3A; hypoxia inducible factor 1alpha; interleukin 18; interleukin 1beta; interleukin 33; interleukin 9; long untranslated RNA; messenger RNA; microRNA; microRNA 103 3p; microRNA 126; microRNA 141; microRNA 153; mi…	Barros-Silva D., Lobo J., Guimaraes-Teixeira C., Carneiro I., Oliveira J., Martens-Uzunova E.S., Henrique R., Jeronimo C., VIRMA-dependent N6-methyladenosine modifications regulate the expression of long non-coding RNAs CCAT1 and CCAT2 in prostate cancer, Cancers, 12, (2020); Briand J., Serandour A.A., Nadaradjane A., Bougras-Cartron G., Heymann D., Ory B., Vallette F.M., Cartron P.-F., N6-adenos…	M. Taheri; Institute of Human Genetics, Jena University Hospital, Jena, Germany; email: Mohammad.taheri@uni-jena.de; M. Samadian; Department of Neurosurgery, Loghman Hakim Hospital, Shahid Beheshti University of Medical Sciences, Tehran, Iran; email: mdsamadian@gmail.com	Elsevier B.V.	142999	EJPHA	36921707	English	Eur. J. Pharmacol.	Review		Scopus	2-s2.0-85150036290
Long H.; Lin H.; Zheng P.; Hou L.; Zhang M.; Lin S.; Yin K.; Zhao G.	Long, Haijiao (57493618900); Lin, Haiyue (57936133300); Zheng, Pan (57936274100); Hou, Lianjie (56571967400); Zhang, Ming (57189391654); Lin, Shuyun (57210104180); Yin, Kai (57203336229); Zhao, Guojun (37039033700)	57493618900; 57936133300; 57936274100; 56571967400; 57189391654; 57210104180; 57203336229; 37039033700	WTAP mediates the anti-inflammatory effect of Astragalus mongholicus polysaccharide on THP-1 macrophages	2022	Frontiers in Pharmacology	10.3389/fphar.2022.1023878	https://www.scopus.com/inward/record.uri?eid=2-s2.0-85140308726&doi=10.3389%2ffphar.2022.1023878&partnerID=40&md5=149b47387a04273ba4c40b54910d5f69	Xiangya Hospital, Central South University, Changsha, China; The Sixth Affiliated Hospital, Guangzhou Medical University, Qingyuan, China; College of Pharmacy, Guilin Medical University, Guilin, China; Department of Cardiology, The Second Afliated Hospital of Guilin Medical University, Guangxi Key Laboratory of Diabetic Systems Medicine, Guilin, China	Background: Astragalus mongholicus polysaccharides (APS) have anti-inflammatory, antioxidant and immunomodulatory effects. Recent studies have demonstrated the epigenetic regulation of N6-methyladenosine (m6A) in the development of inflammation. However, the effect of APS on m6A modification is unclear. Here, for the first time, we investigate the mechanism of m6A modification in APS regulation o…	APS; IL-6; M6A; macrophage inflammation; WTAP	antioxidant; Astragalus mongholicus polysaccharide; immunoglobulin enhancer binding protein; interleukin 10; interleukin 1beta; interleukin 6; messenger RNA; polysaccharide; reactive oxygen metabolite; small interfering RNA; tumor necrosis factor; unclassified drug; WT1 protein; animal cell; antiinflammatory activity; Article; atherosclerosis; cell viability; cell viability assay; controlled stud…	Aguzzi C., Marinelli O., Zeppa L., Santoni G., Maggi F., Nabissi M., Evaluation of anti-inflammatory and immunoregulatory activities of Stimunex® and Stimunex D3® in human monocytes/macrophages stimulated with LPS or IL-4/IL-13, Biomed. Pharmacother, 132, (2020); Chen C., Fu Q., Li Y., Li Z., Effect of Astragalus mongholicus polysaccharides on gene expression profiles of dendritic cells isolated …	G. Zhao; Xiangya Hospital, Central South University, Changsha, China; email: zhaoguojun@gzhmu.edu.cn; K. Yin; Department of Cardiology, The Second Afliated Hospital of Guilin Medical University, Guangxi Key Laboratory of Diabetic Systems Medicine, Guilin, China; email: Kaiyinby@qq.com	Frontiers Media S.A.	16639812			English	Front. Pharmacol.	Article	All Open Access; Gold Open Access; Green Open Access	Scopus	2-s2.0-85140308726
Wang H.; Fu L.; Li Y.; Wei L.; Gu X.; Li H.; Li J.; Wen S.	Wang, Hui (58850672400); Fu, Liujing (58133234700); Li, Yin (58132657400); Wei, Liudong (58133234800); Gu, Xiufeng (58132076300); Li, Huanming (57210211118); Li, Jie (58132463700); Wen, Shangyu (55467048600)	58850672400; 58133234700; 58132657400; 58133234800; 58132076300; 57210211118; 58132463700; 55467048600	m6A methyltransferase WTAP regulates myocardial ischemia reperfusion injury through YTHDF1/FOXO3a signaling	2023	Apoptosis	10.1007/s10495-023-01818-4	https://www.scopus.com/inward/record.uri?eid=2-s2.0-85149491832&doi=10.1007%2fs10495-023-01818-4&partnerID=40&md5=4b51afeb66ef0b0bae0c542d67aa0b04	Department of Cardiology, Tianjin Fourth Central Hospital, Tianjin, 300140, China	N6-methyladenosine (m6A) is emerging as an essential regulator in the progression of myocardial ischemia reperfusion (I/R) injury. However, the in-depth functions and mechanisms for m6A are still unclear. This work aimed to explore the potential functions and mechanisms for myocardial I/R injury. In this study, m6A methyltransferase WTAP and m6A modification level elevated in the hypoxia/reoxygen…	FOXO3a; Myocardial ischemia reperfusion injury; N<sup>6</sup>-methyladenosine; WTAP	Animals; Apoptosis; Methyltransferases; Myocardial Reperfusion Injury; Myocytes, Cardiac; Rats; RNA, Messenger; 6 n methyladenosine; cytokine; interleukin 1beta; messenger RNA; methyltransferase; transcription factor FKHRL1; tumor necrosis factor; unclassified drug; wtap protein; messenger RNA; methyltransferase; 3' untranslated region; 5' untranslated region; animal cell; animal experiment; anim…	Regan B., O'Kennedy R., Collins D., Advances in point-of-care testing for cardiovascular diseases, Adv Clin Chem, 104, pp. 1-70, (2021); Krittanawong C., Narasimhan B., Wang Z., Hahn J., Virk H.U.H., Farrell A.M., Et al., Association between chocolate consumption and risk of coronary artery disease: a systematic review and meta-analysis, Eur J Prev Cardiol, 28, pp. e33-e35, (2021); Pan Q., Liu Y.…	S. Wen; Department of Cardiology, Tianjin Fourth Central Hospital, Tianjin, 300140, China; email: shangyu_wen@yeah.net	Springer	13608185	APOPF	36894806	English	Apoptosis	Article		Scopus	2-s2.0-85149491832
Xiao Q.; Wu X.; Deng C.; Zhao L.; Peng L.; Zhou J.; Zhang W.; Zhao Y.; Fei Y.	Xiao, Qiufeng (57443650500); Wu, Xunyao (56599223100); Deng, Chuiwen (39261257500); Zhao, Lidan (55493588400); Peng, Linyi (56523810800); Zhou, Jiaxin (56813938700); Zhang, Wen (56124892400); Zhao, Yan (26121471800); Fei, Yunyun (40461280200)	57443650500; 56599223100; 39261257500; 55493588400; 56523810800; 56813938700; 56124892400; 26121471800; 40461280200	The potential role of RNA N6-methyladenosine in primary Sjögren’s syndrome	2022	Frontiers in Medicine	10.3389/fmed.2022.959388	https://www.scopus.com/inward/record.uri?eid=2-s2.0-85143212915&doi=10.3389%2ffmed.2022.959388&partnerID=40&md5=2c555d26989dd6c03eecc15080f666b9	Department of Rheumatology and Clinical Immunology, Chinese Academy of Medical Sciences and Peking Union Medical College, Beijing, China; National Clinical Research Center for Dermatologic and Immunologic Diseases, Ministry of Science and Technology, Beijing, China; State Key Laboratory of Complex Severe and Rare Diseases, Peking Union Medical College Hospital, Chinese Academy of Medical Sciences…	Objective: The pathogenesis of primary Sjögren’s syndrome (pSS) remains incompletely understood. The N6-methyladenosine (m6A) RNA modification, the most abundant internal transcript modification, has close associations with multiple diseases. This study aimed to investigate the role of m6A in patients with pSS. Materials and methods: This study enrolled 44 patients with pSS, 50 age- and gender-ma…	ALKBH5; ISG15; METTL3; N6-methyladenosine; primary Sjögren’s syndrome; YTHDF readers	6 n methyladenosine; alkylated DNA repair protein alkB homolog 5; C reactive protein; messenger RNA; RNA; adult; Article; clinical article; clinical study; controlled study; disease activity; erythrocyte sedimentation rate; female; genetic modification; human; human cell; leukocyte; logistic regression analysis; male; middle aged; monocyte; neutrophil; pathogenesis; peripheral blood mononuclear c…	Qin B., Wang J., Yang Z., Yang M., Ma N., Huang F., Et al., Epidemiology of primary Sjögren’s syndrome: a systematic review and meta-analysis, Ann Rheum Dis, 74, pp. 1983-1989, (2015); Brito-Zeron P., Baldini C., Bootsma H., Bowman S.J., Jonsson R., Mariette X., Et al., Sjögren syndrome, Nat Rev Dis Primers, 2, (2016); Mariette X., Criswell L.A., Primary sjögren’s syndrome, N Engl J Med, 378, pp.…	J. Zhou; Department of Rheumatology and Clinical Immunology, Chinese Academy of Medical Sciences and Peking Union Medical College, Beijing, China; email: pumczhou@sina.com; Y. Fei; Department of Rheumatology and Clinical Immunology, Chinese Academy of Medical Sciences and Peking Union Medical College, Beijing, China; email: feiyunyun@pumch.cn	Frontiers Media SA	2296858X			English	Front. Med.	Article	All Open Access; Gold Open Access	Scopus	2-s2.0-85143212915
Chen H.; Zhang X.; Su H.; Zeng J.; Chan H.; Li Q.; Liu X.; Zhang L.; Wu W.K.K.; Chan M.T.V.; Chen H.	Chen, Hongyan (55675224344); Zhang, Xiaoting (57210580423); Su, Hao (57221835510); Zeng, Judeng (57195572210); Chan, Hung (56892506300); Li, Qing (57221481942); Liu, Xiaodong (57281274100); Zhang, Lin (57208267988); Wu, William Ka Kei (18345422600); Chan, Matthew Tak Vai (57733230400); Chen, Huarong (37119896400)	55675224344; 57210580423; 57221835510; 57195572210; 56892506300; 57221481942; 57281274100; 57208267988; 18345422600; 57733230400; 37119896400	Immune dysregulation and RNA N6-methyladenosine modification in sepsis	2023	Wiley Interdisciplinary Reviews: RNA	10.1002/wrna.1764	https://www.scopus.com/inward/record.uri?eid=2-s2.0-85138616801&doi=10.1002%2fwrna.1764&partnerID=40&md5=077efa6302fefd29cc158285dcd4c2b6	Department of Anaesthesia and Intensive Care and Peter Hung Pain Research Institute, The Chinese University of Hong Kong, Hong Kong; CUHK Shenzhen Research Institute, Guangdong, Shenzhen, China; Li Ka Shing Institute of Health Sciences, The Chinese University of Hong Kong, Hong Kong; State Key Laboratory of Digestive Diseases, The Chinese University of Hong Kong, Hong Kong	Sepsis is defined as life-threatening organ dysfunction caused by the host immune dysregulation to infection. It is a highly heterogeneous syndrome with complex pathophysiological mechanisms. The host immune response to sepsis can be divided into hyper-inflammatory and immune-suppressive phases which could exist simultaneously. In the initial stage, systemic immune response is activated after exp…	hyperinflammation; immunosuppression; N6-methyladenosine; reprogramming; sepsis	Gene Expression Regulation; Humans; Methylation; RNA; Sepsis; 6 n methyladenosine; alkylated DNA repair protein alkB homolog 5; B7 antigen; CD40 antigen; CD86 antigen; chemokine receptor CXCR2; CXCL2 chemokine; gamma interferon; granulocyte colony stimulating factor; granulocyte macrophage colony stimulating factor; granzyme; histone deacetylase 4; HLA DR antigen; interleukin 10; interleukin 13; …	Abel A.M., Yang C., Thakar M.S., Malarkannan S., Natural killer cells: Development, maturation, and clinical utilization, Frontiers in Immunology, 9, (2018); Ontiveros C.O., Guerra-Resendez R.S., Nishiguchi T., Ladki M., Hilton I.B., Schlesinger L.S., DiNardo A.R., Reversing post-infectious epigenetic-mediated immune suppression, Frontiers in Immunology, 12, (2021); Adhikari N.K., Fowler R.A., Bh…	M.T.V. Chan; Department of Anaesthesia and Intensive Care, Peter Hung Pain Research Institute, The Chinese University of Hong Kong, Hong Kong; email: mtvchan@cuhk.edu.hk; H. Chen; Department of Anaesthesia and Intensive Care and Peter Hung Pain Research Institute, The Chinese University of Hong Kong, Hong Kong; email: hchen2@cuhk.edu.hk	John Wiley and Sons Inc	17577004		36149809	English	Wiley Interdiscip. Rev. RNA	Review		Scopus	2-s2.0-85138616801
Yang L.; Fu J.; Han X.; Zhang C.; Xia L.; Zhu R.; Huang S.; Xiao W.; Yu H.; Gao Y.; Liang Q.; Li W.; Zhou Y.	Yang, Lan (57205414961); Fu, Jinrong (57197821769); Han, Xiao (57223864785); Zhang, Caiyan (57190974312); Xia, Li (57194947622); Zhu, Ronghui (57216853544); Huang, Saihua (57212062765); Xiao, Wenfeng (57218587621); Yu, Hongmiao (57418473400); Gao, Yajing (57218584749); Liang, Qiuyan (57218582544); Li, Wei (56416707600); Zhou, Yufeng (36182116200)	57205414961; 57197821769; 57223864785; 57190974312; 57194947622; 57216853544; 57212062765; 57218587621; 57418473400; 57218584749; 57218582544; 56416707600; 36182116200	Hsa_circ_0004287 inhibits macrophage-mediated inflammation in an N6-methyladenosine–dependent manner in atopic dermatitis and psoriasis	2022	Journal of Allergy and Clinical Immunology	10.1016/j.jaci.2021.11.024	https://www.scopus.com/inward/record.uri?eid=2-s2.0-85123068649&doi=10.1016%2fj.jaci.2021.11.024&partnerID=40&md5=0d12b122fe94958cbac0c426148158be	Institute of Pediatrics, Children's Hospital of Fudan University, National Children's Medical Center, and the Shanghai Key Laboratory of Medical Epigenetics, International Co-laboratory of Medical Epigenetics and Metabolism, Ministry of Science and Technology, Institutes of Biomedical Sciences, Fudan University, Shanghai, China; National Health Commission Key Laboratory of Neonatal Diseases, Fuda…	Background: Circular RNA (circRNA) has been implicated in various diseases; however, its role in atopic dermatitis (AD) or psoriasis remains unclear. Objective: We sought to determine the differential expression profiles of circRNAs in peripheral blood mononuclear cells between healthy controls and AD patients, and explore the mechanisms underlying the effects of circRNAs on the pathogenesis of A…	atopic dermatitis; Circular RNA; macrophage activation; N<sup>6</sup>-methyladenosine; psoriasis	Adenosine; Animals; Dermatitis, Atopic; Humans; Inflammation; Leukocytes, Mononuclear; Macrophages; Mice; MicroRNAs; Psoriasis; RNA, Circular; RNA, Long Noncoding; 1 chloro 2,4 dinitrobenzene; 6 n methyladenosine; calgranulin A; calgranulin B; circular ribonucleic acid; circular ribonucleic acid 0004287; dermatological agent; imiquimod; mitogen activated protein kinase p38; somatomedin binding pr…	Weidinger S., Beck L.A., Bieber T., Kabashima K., Irvine A.D., Atopic dermatitis, Nat Rev Dis Primers, 4, (2018); Mayba J.N., Gooderham M.J., Review of atopic dermatitis and topical therapies, J Cutan Med Surg, 21, pp. 227-236, (2017); Nakajima S., Nomura T., Common J., Kabashima K., Insights into atopic dermatitis gained from genetically defined mouse models, J Allergy Clin Immunol, 143, pp. 13-…	Y. Zhou; Minhang, 399 Wanyuan Rd, Shanghai, 201102, China; email: yfzhou1@fudan.edu.cn; W. Li; jing'an, 12 Middle Wulumuqi Rd, Shanghai, 200040, China; email: liweiderma@fudan.edu.cn	Elsevier Inc.	916749	JACIB	34953789	English	J. Allergy Clin. Immunol.	Article		Scopus	2-s2.0-85123068649
Tang J.; Yu Z.; Xia J.; Jiang R.; Chen S.; Ye D.; Sheng H.; Lin J.	Tang, Jifeng (57216448465); Yu, Ziqing (57350773900); Xia, Jinfang (57436077700); Jiang, Renquan (57358620300); Chen, Shuhui (57687025500); Ye, Detai (57210003527); Sheng, Huiming (14071833900); Lin, Jinpiao (35741095800)	57216448465; 57350773900; 57436077700; 57358620300; 57687025500; 57210003527; 14071833900; 35741095800	METTL14-Mediated m6A Modification of TNFAIP3 Involved in Inflammation in Patients With Active Rheumatoid Arthritis	2023	Arthritis and Rheumatology	10.1002/art.42629	https://www.scopus.com/inward/record.uri?eid=2-s2.0-85173121860&doi=10.1002%2fart.42629&partnerID=40&md5=cbcd9cdd59416e21af0f40383283d12e	Department of Laboratory Medicine, Tongren Hospital, Shanghai Jiao Tong University School of Medicine, Shanghai, China and Department of Laboratory Medicine, The First Affiliated Hospital of Fujian Medical University, Fuzhou, China; Department of Laboratory Medicine, The First Affiliated Hospital of Fujian Medical University, Fuzhou, China and Department of Pathology, Fujian Cancer Hospital, Fuzh…	Objective: The aim of the study was to investigate the role of N6-methyladenosine (m6A) modification in the progression of rheumatoid arthritis (RA). Methods: Peripheral blood mononuclear cells (PBMCs) from patients with RA and healthy controls were collected. The expression of m6A modification-related proteins and m6A levels were detected using polymerase chain reaction (PCR), western blot, and …		Animals; Arthritis, Experimental; Arthritis, Rheumatoid; Humans; Inflammation; Interleukin-17; Interleukin-6; Leukocytes, Mononuclear; Methyltransferases; Mice; RNA; Tumor Necrosis Factor alpha-Induced Protein 3; 6 n methyladenosine; immunoglobulin enhancer binding protein; interleukin 17; interleukin 6; messenger RNA; methyltransferase; methyltransferase like 14; tumor necrosis factor alpha indu…	Smolen J.S., Aletaha D., McInnes I.B., Rheumatoid arthritis [review], Lancet, 388, pp. 2023-2038, (2016); Viatte S., Barton A., Genetics of rheumatoid arthritis susceptibility, severity, and treatment response [review], Semin Immunopathol, 39, pp. 395-408, (2017); Tan E.M., Smolen J.S., Historical observations contributing insights on etiopathogenesis of rheumatoid arthritis and role of rheumatoi…	J. Lin; Department of Laboratory Medicine, Tongren Hospital, Shanghai Jiao Tong University School of Medicine, Shanghai, China and Department of Laboratory Medicine, The First Affiliated Hospital of Fujian Medical University, Fuzhou, China; email: jinpiaolin@163.com; H. Sheng; Department of Laboratory Medicine, Tongren Hospital, Shanghai Jiao Tong University School of Medicine, Shanghai, China; F…	John Wiley and Sons Inc	23265191		37327357	English	Arthritis Rheum.	Article		Scopus	2-s2.0-85173121860
Li R.; Yin Y.-H.; Ji X.-L.; Liu X.; Li J.-P.; Qu Y.-Q.	Li, Rui (57188654398); Yin, Yun-Hong (56203326700); Ji, Xiu-Li (57196035438); Liu, Xiao (57224635181); Li, Jian-Ping (57841539200); Qu, Yi-Qing (36114920000)	57188654398; 56203326700; 57196035438; 57224635181; 57841539200; 36114920000	Pan-Cancer Prognostic, Immunity, Stemness, and Anticancer Drug Sensitivity Characterization of N6-Methyladenosine RNA Modification Regulators in Human Cancers	2021	Frontiers in Molecular Biosciences	10.3389/fmolb.2021.644620	https://www.scopus.com/inward/record.uri?eid=2-s2.0-85108068102&doi=10.3389%2ffmolb.2021.644620&partnerID=40&md5=fcfef7454a9948448ef619e9a9f0986d	Department of Pulmonary and Critical Care Medicine, Qilu Hospital, Cheeloo College of Medicine, Shandong University, Jinan, China; Department of Pulmonary and Critical Care Medicine, Qilu Hospital of Shandong University, Jinan, China; Department of Pulmonary Disease, Traditional Chinese Medicine Hospital of Jinan, Jinan, China	N6-methyladenosine RNA modification plays a significant role in the progression of multiple tumorigenesis. Our study identified the imperative role of m6A regulators in the tumor immune microenvironment, survival, stemness score, and anticancer drug sensitivity of pan-cancer. The Wilcox test was to identify the differential expression between 17 m6A regulators across 33 TCGA cancer types and thei…	drug sensitivity; m6A regulators; overall survival; pan-cancer analysis; tumor immune microenvironment		Bai Y., Yang C., Wu R., Huang L., Song S., Li W., Et al., YTHDF1 Regulates Tumorigenicity and Cancer Stem Cell-like Activity in Human Colorectal Carcinoma, Front. Oncol, 9, (2019); Barbieri I., Tzelepis K., Pandolfini L., Shi J., Millan-Zambrano G., Robson S.C., Et al., Promoter-bound METTL3 Maintains Myeloid Leukaemia by m6A-dependent Translation Control, Nature, 552, pp. 126-131, (2017); Chao Y…	Y.-Q. Qu; Department of Pulmonary and Critical Care Medicine, Qilu Hospital of Shandong University, Jinan, China; email: quyiqing@sdu.edu.cn	Frontiers Media S.A.	2296889X			English	Front. Mol. Biosci.	Article	All Open Access; Gold Open Access; Green Open Access	Scopus	2-s2.0-85108068102
Wan L.; Liu J.; Huang C.; Zhu Z.; Li F.; Sun G.; Wang K.; Li S.; Ma X.; Chen X.; Yuan W.	Wan, Lei (57203799721); Liu, Jian (55705924500); Huang, Chuanbing (55582989800); Zhu, Ziheng (57954186900); Li, Fangze (58043617900); Sun, Guanghan (57216293845); Wang, Kun (57203498756); Li, Shu (57226251674); Ma, Ximeng (57226253405); Chen, Xi (56365812900); Yuan, Wang (58043667200)	57203799721; 55705924500; 55582989800; 57954186900; 58043617900; 57216293845; 57203498756; 57226251674; 57226253405; 56365812900; 58043667200	Role of m6A modification and novel circ_0066715/ miR-486-5p/ ETS1 axis in rheumatoid arthritis macrophage polarization progression	2022	Aging	10.18632/aging.204439	https://www.scopus.com/inward/record.uri?eid=2-s2.0-85145668790&doi=10.18632%2faging.204439&partnerID=40&md5=fdcf81730067c6610c9a4fe80296dc87	The First Affiliated Hospital of Anhui University of Chinese Medicine, Hefei, 230038, China; Key Laboratory of Xin’an Medical Education Ministry, Hefei, 230038, China; College of Traditional Chinese Medicine, Anhui University of Chinese Medicine, Hefei, 230012, China	Rheumatoid arthritis (RA) is a systemic disease dominated by inflammatory synovitis. RA synovial macrophages tend undergo M1-type macrophage polarization. Then, polarized M1-type macrophages secrete abundant pro-inflammatory cytokines, causing joint and cartilage destruction. N6-methyladenosine (m6A) methylation modification, circular RNA (circRNA), microRNA (miRNA), messenger RNA (mRNA), etc. ar…	Circular rna; Macrophage polarization; Microrna; N6-methyladenosine methylation modification; Rheumatoid arthritis	Arthritis, Rheumatoid; Cytokines; Humans; Macrophages; MicroRNAs; Proto-Oncogene Protein c-ets-1; RNA, Circular; RNA, Messenger; cytokine; ETS1 protein, human; messenger RNA; microRNA; MIRN486 microRNA, human; transcription factor Ets 1; genetics; human; macrophage; metabolism; rheumatoid arthritis	Hodge JA, Kawabata TT, Krishnaswami S, Clark JD, Telliez JB, Dowty ME, Menon S, Lamba M, Zwillich S., The mechanism of action of tofacitinib - an oral Janus kinase inhibitor for the treatment of rheumatoid arthritis, Clin Exp Rheumatol, 34, pp. 318-328, (2016); Daikh DI., Rheumatoid arthritis: Evolving recognition of a common disease, Best Pract Res Clin Rheumatol, 36, (2022); Fearon U, Canavan M…	L. Wan; The First Affiliated Hospital of Anhui University of Chinese Medicine, Hefei, 230038, China; email: yxwanlei@163.com; J. Liu; The First Affiliated Hospital of Anhui University of Chinese Medicine, Hefei, 230038, China; email: wllensy@163.com	Impact Journals LLC	19454589		36541909	English	Aging	Article	All Open Access; Gold Open Access	Scopus	2-s2.0-85145668790
Tao H.; Dong L.; Li L.	Tao, Hongmiao (7202328221); Dong, Lihua (57754053300); Li, Lin (57196179524)	7202328221; 57754053300; 57196179524	N6-methyladenosine modulation classes and immune microenvironment regulation in ischemic stroke	2022	Frontiers in Molecular Neuroscience	10.3389/fnmol.2022.1013076	https://www.scopus.com/inward/record.uri?eid=2-s2.0-85145748406&doi=10.3389%2ffnmol.2022.1013076&partnerID=40&md5=9f26494502efc1b0ad27de6bf8e69f5e	Medical College, Jinhua Polytechnic, Jinhua, China; College of Basic Medical Sciences, Zhejiang Chinese Medical University, Hangzhou, China	N6-methyladenosine (m6A) modifications play an important role in the differentiation and regulation of immune cells. However, research on m6A in ischemic stroke (IS) is still in its infancy, and their role of the immune microenvironment remains unknown. In this study, we systematically assessed the modification classes of m6A regulators in IS based on the GEO database (GSE16561 and GSE22255). We …	class; GEO; immune; ischemic stroke; m6A	6 n methyladenosine; ALKBH5 gene; Article; CBLL1 gene; CD8+ T lymphocyte; cell infiltration; classifier; clinical article; controlled study; data base; dendritic cell; diagnostic test accuracy study; differential gene expression; down regulation; ELAVL1 gene; engraving; gene expression level; gene ontology; gene set enrichment analysis; gene set variation analysis; GEO database; human; IGF2BP1 ge…	Alim I., Caulfield J.T., Chen Y., Swarup V., Geschwind D.H., Ivanova E., Et al., Selenium drives a transcriptional adaptive program to block Ferroptosis and treat stroke, Cells, 177, (2019); Allen C., Thornton P., Denes A., McColl B.W., Pierozynski A., Monestier M., Et al., Neutrophil cerebrovascular transmigration triggers rapid neurotoxicity through release of proteases associated with deconden…	H. Tao; Medical College, Jinhua Polytechnic, Jinhua, China; email: 20050731@jhc.edu.cn	Frontiers Media S.A.	16625099			English	Front. Mol. Neurosci.	Article	All Open Access; Gold Open Access; Green Open Access	Scopus	2-s2.0-85145748406
Shen J.; Wang W.; Shao X.; Wu J.; Li S.; Che X.; Ni Z.	Shen, Jianxiao (57191483067); Wang, Wanpeng (58440354600); Shao, Xinghua (56064835900); Wu, Jingkui (57212348907); Li, Shu (57249841600); Che, Xiajing (36128313100); Ni, Zhaohui (12040759200)	57191483067; 58440354600; 56064835900; 57212348907; 57249841600; 36128313100; 12040759200	Integrated Analysis of m6A Methylome in Cisplatin-Induced Acute Kidney Injury and Berberine Alleviation in Mouse	2020	Frontiers in Genetics	10.3389/fgene.2020.584460	https://www.scopus.com/inward/record.uri?eid=2-s2.0-85097214376&doi=10.3389%2ffgene.2020.584460&partnerID=40&md5=f1526182ae65e21e71f18e1f55da4066	Department of Nephrology, Renji Hospital, Shanghai Jiao Tong University School of Medicine, Shanghai, China; Department of Nephrology, Lianshui People’s Hospital, Lianshui, China	Background: N6-methyladenosine (m6A) is the most abundant modification known in mRNAs. It participates in a variety of physiological and pathological processes, such as metabolism, inflammation, and apoptosis. Aims: To explore the mechanism of m6A in cisplatin-induced acute kidney injury (AKI) and berberine alleviation in mouse. Methods: This study investigated the N6-methyladenosine (m6A) methyl…	berberine; cisplatin induced nephrotoxicity; FGA; Havcr1; M6A; SLC12A1	6 n methyladenosine; berberine; cisplatin; connexin 43; creatinine; hepatitis A virus cellular receptor 1; isoleucine; loop diuretic agent; microRNA; sodium potassium chloride cotransporter 2; sterol regulatory element binding protein 1c; transcriptome; uvomorulin; valine; vanadate sodium; acute kidney failure; acute myeloid leukemia; animal experiment; animal model; animal tissue; apoptosis; Art…	Ahmad S., Hussain A., Hussain A., Abdullah I., Ali M.S., Froeyen M., Et al., Quantification of berberine in Berberis vulgaris L. root extract and its curative and prophylactic role in cisplatin-induced in vivo toxicity and in vitro cytotoxicity, Antioxidants, 8, 185, (2019); Anders M., Chelysheva I., Goebel I., Trenkner T., Zhou J., Mao Y., Et al., Dynamic m(6)A methylation facilitates mRNA triag…	X. Che; Department of Nephrology, Renji Hospital, Shanghai Jiao Tong University School of Medicine, Shanghai, China; email: chexj@126.com; Z. Ni; Department of Nephrology, Renji Hospital, Shanghai Jiao Tong University School of Medicine, Shanghai, China; email: profnizh@126.com	Frontiers Media S.A.	16648021			English	Front. Genet.	Article	All Open Access; Gold Open Access; Green Open Access	Scopus	2-s2.0-85097214376
Zhang Y.; Gu X.; Li D.; Cai L.; Xu Q.	Zhang, Yiwen (57126486300); Gu, Xiaofei (57212676166); Li, Di (57205630261); Cai, Luhui (57207829929); Xu, Qiong (36239393500)	57126486300; 57212676166; 57205630261; 57207829929; 36239393500	Mettl3 regulates osteoblast differentiation and inflammatory response via smad signaling and mapk signaling	2020	International Journal of Molecular Sciences	10.3390/ijms21010199	https://www.scopus.com/inward/record.uri?eid=2-s2.0-85077307223&doi=10.3390%2fijms21010199&partnerID=40&md5=829d2db3b2c5ac0a49b4746461328b20	Guanghua School of Stomatology & Guangdong Provincial Key Laboratory of Stomatology, Sun Yat-sen University, Guangzhou, 510055, China	Osteoblasts are crucial bone-building cells that maintain bone homeostasis, whereas inflammatory stimuli can inhibit osteogenesis and activate inflammatory response. N6-methyladenosine (m6A) is the most abundant mRNA modification in eukaryotes and plays important roles in multiple biological processes. However, whether m6A modification affects osteoblast differentiation and inflammatory response …	Inflammatory response; MAPK; METTL3; MRNA stability; Osteoblast differentiation; Smad; YTHDF2	3T3 Cells; Adenosine; Animals; Cell Differentiation; Cell Line; Cytokines; Down-Regulation; Inflammation; Methyltransferases; Mice; Mitogen-Activated Protein Kinases; NF-kappa B; Osteoblasts; Osteogenesis; Phosphorylation; RNA, Messenger; Signal Transduction; Smad Proteins; Up-Regulation; 1,4 diamino 1,4 bis(2 aminophenylthio) 2,3 dicyanobutadiene; 4 (4 fluorophenyl) 2 (4 methylsulfinylphenyl) 5 …	Long F., Building strong bones: Molecular regulation of the osteoblast lineage, Nat. Rev. Mol. Cell Biol., 13, pp. 27-38, (2011); Maes C., Kobayashi T., Selig M.K., Torrekens S., Roth S.I., Mackem S., Carmeliet G., Kronenberg H.M., Osteoblast Precursors, but Not Mature Osteoblasts, Move into Developing and Fractured Bones along with Invading Blood Vessels, Dev. Cell, 19, pp. 329-344, (2010); Capu…	Q. Xu; Guanghua School of Stomatology & Guangdong Provincial Key Laboratory of Stomatology, Sun Yat-sen University, Guangzhou, 510055, China; email: xqiong@mail.sysu.edu.cn	MDPI AG	16616596		31892163	English	Int. J. Mol. Sci.	Article	All Open Access; Gold Open Access	Scopus	2-s2.0-85077307223
Dong M.; Shen W.; Yang G.; Yang Z.; Li X.	Dong, Menglu (57212460206); Shen, Wenzhuang (37113069800); Yang, Guang (57218669762); Yang, Zhifang (7405435194); Li, Xingrui (7501706182)	57212460206; 37113069800; 57218669762; 7405435194; 7501706182	Analysis of m6A Methylation Modification Patterns and Tumor Immune Microenvironment in Breast Cancer	2022	Frontiers in Cell and Developmental Biology	10.3389/fcell.2022.785058	https://www.scopus.com/inward/record.uri?eid=2-s2.0-85124601596&doi=10.3389%2ffcell.2022.785058&partnerID=40&md5=5679d5e617a93475420c89a2e5702acf	Department of Thyroid and Breast Surgery, Tongji Hospital, Tongji Medical College of Huazhong University of Science and Technology, Wuhan, China; Department of Thoracic Surgery, Tongji Hospital, Tongji Medical College, Huazhong University of Science and Technology, Wuhan, China	Increasing evidence indicates that the abnormal expression of N6-methyladenosine (m6A) modification is closely related to the epigenetic regulation of immune response in breast cancer (BC). However, the potential roles of m6A modification in the tumor microenvironment (TME) of BC remain unclear. For addressing this issue, we comprehensively analyzed the m6A modification patterns in 983 samples an…	breast cancer; immunotherapy; M6A; mutation burden; tumor microenvironment	6 n methyladenosine; immune checkpoint inhibitor; programmed death 1 ligand 1; programmed death 1 receptor; Article; breast cancer; cancer immunotherapy; cancer prognosis; cell infiltration; epigenetics; genetic variation; human; immunocompetent cell; immunostimulation; methylation; phenotype; quantitative analysis; somatic mutation; stroma; tumor microenvironment; tumor mutational burden	Alarcon C.R., Lee H., Goodarzi H., Halberg N., Tavazoie S.F., N6-Methyladenosine marks Primary microRNAs for Processing, Nature, 519, pp. 482-485, (2015); Ali H.R., Chlon L., Pharoah P.D.P., Markowetz F., Caldas C., Patterns of Immune Infiltration in Breast Cancer and Their Clinical Implications: A Gene-Expression-Based Retrospective Study, Plos Med, 13, (2016); Chen D.S., Mellman I., Elements of…	Z. Yang; Department of Thyroid and Breast Surgery, Tongji Hospital, Tongji Medical College of Huazhong University of Science and Technology, Wuhan, China; email: yangzhifangtj@163.com; X. Li; Department of Thyroid and Breast Surgery, Tongji Hospital, Tongji Medical College of Huazhong University of Science and Technology, Wuhan, China; email: lixingrui@tjh.tjmu.edu.cn	Frontiers Media S.A.	2296634X			English	Front. Cell Dev. Biol.	Article	All Open Access; Gold Open Access; Green Open Access	Scopus	2-s2.0-85124601596
Zhang B.; Wu Q.; Li B.; Wang D.; Wang L.; Zhou Y.L.	Zhang, Bo (57203417408); Wu, Qiong (59039540500); Li, Ben (57349330600); Wang, Defeng (56605601400); Wang, Lei (57215776314); Zhou, You Lang (37073899700)	57203417408; 59039540500; 57349330600; 56605601400; 57215776314; 37073899700	M6A regulator-mediated methylation modification patterns and tumor microenvironment infiltration characterization in gastric cancer	2020	Molecular Cancer	10.1186/s12943-020-01170-0	https://www.scopus.com/inward/record.uri?eid=2-s2.0-85081924238&doi=10.1186%2fs12943-020-01170-0&partnerID=40&md5=dbab3450e2b6420a6d515b22ac03613e	Research Center of Clinical Medicine, Affiliated Hospital, Nantong University, Nantong, Jiangsu Province, 226001, China; Medical School of Nantong University, Nantong, Jiangsu Province, 226001, China; Department of Cardiothoracic Surgery, Affiliated Hospital, Nantong University, Nantong, Jiangsu Province, 226001, China; State Key Laboratory of Microbial Metabolism, School of Life Sciences and Bio…	Background: The epigenetic regulation of immune response has been demonstrated in recent studies. Nonetheless, potential roles of RNA N6-methyladenosine (m6A) modification in tumor microenvironment (TME) cell infiltration remain unknown. Methods: We comprehensively evaluated the m6A modification patterns of 1938 gastric cancer samples based on 21 m6A regulators, and systematically correlated thes…	Immunotherapy; m<sup>6</sup>A; Mutation burden; Stroma; Tumor microenvironment	Adenosine; Apoptosis; Biomarkers, Tumor; CD8-Positive T-Lymphocytes; Cell Proliferation; DNA Methylation; Epigenesis, Genetic; Gene Expression Regulation, Neoplastic; Humans; Prognosis; Stomach Neoplasms; Survival Rate; Tumor Cells, Cultured; Tumor Microenvironment; 6 n methyladenosine; transcriptome; adenosine; N6-methyladenosine (m6A); tumor marker; Article; cancer growth; cancer immunotherapy;…	Boccaletto P., MacHnicka M.A., Purta E., Piatkowski P., Baginski B., Wirecki T.K., De Crecy-Lagard V., Ross R., Limbach P.A., Kotter A., Et al., MODOMICS: A database of RNA modification pathways. 2017 update, Nucleic Acids Res, 46, pp. D303-D307, (2018); Roundtree I.A., Evans M.E., Pan T., He C., Dynamic RNA modifications in gene expression regulation, Cell, 169, pp. 1187-1200, (2017); Alarcon C.…	Y.L. Zhou; Research Center of Clinical Medicine, Affiliated Hospital, Nantong University, Nantong, Jiangsu Province, 226001, China; email: zhouyoulang@ntu.edu.cn	BioMed Central Ltd.	14764598	MCOAC	32164750	English	Mol. Cancer	Article	All Open Access; Gold Open Access	Scopus	2-s2.0-85081924238
Zhang Y.; Zhang K.; Gong H.; Li Q.; Man L.; Jin Q.; Zhang L.; Li S.	Zhang, Yundi (59292592200); Zhang, Ke (57209656391); Gong, Haoming (57466678800); Li, Qin (56289286700); Man, Lajie (57287295300); Jin, Qingchang (57466678900); Zhang, Lin (57213177164); Li, Song (57226476743)	59292592200; 57209656391; 57466678800; 56289286700; 57287295300; 57466678900; 57213177164; 57226476743	Links Between N 6-Methyladenosine and Tumor Microenvironments in Colorectal Cancer	2022	Frontiers in Cell and Developmental Biology	10.3389/fcell.2022.807129	https://www.scopus.com/inward/record.uri?eid=2-s2.0-85125262157&doi=10.3389%2ffcell.2022.807129&partnerID=40&md5=2dfbaf6a78bf42f45f946461f2e6c948	National Cancer Center/Cancer Hospital, Chinese Academy of Medical Sciences, Peking Union Medical College, Beijing, China; Department of General Practice, Qilu Hospital, Cheeloo College of Medicine, Shandong University, Jinan, China; Department of Physiology, School of Basic Medical Sciences, Cheeloo College of Medicine, Shandong University, Jinan, China; Department of General Surgery, Qilu Hospi…	N6-methyladenosine (m6A) is a critical epigenetic modification for tumor malignancies, but its role in regulating the tumor microenvironments (TMEs) has not been fully studied. By integrating multiple data sets and multi-omics data, we comprehensively evaluated the m6A “writers,” “erasers,” and “readers” in colorectal cancer and their association with TME characteristics. The m6A regulator genes …	colorectal cancer; immunotherapy; molecular classification; N<sup>6</sup>-methyladenosine; tumor microenvironments	6 n methyladenosine; alkylated DNA repair protein alkB homolog 5; alpha ketoglutarate dependent dioxygenase alkB homolog 3; alpha ketoglutarate dependent dioxygenase FTO; ELAV like protein 1; fragile X mental retardation protein; immune checkpoint inhibitor; somatomedin binding protein 1; somatomedin binding protein 2; somatomedin binding protein 3; antigen presentation; Article; cancer immunothe…	Angell H.K., Bruni D., Barrett J.C., Herbst R., Galon J., The Immunoscore: Colon Cancer and beyond, Clin. Cancer Res, 26, 2, pp. 332-339, (2020); Becht E., de Reynies A., Giraldo N.A., Pilati C., Buttard B., Lacroix L., Et al., Immune and Stromal Classification of Colorectal Cancer Is Associated with Molecular Subtypes and Relevant for Precision Immunotherapy, Clin. Cancer Res, 22, 16, pp. 4057-4…	L. Zhang; Department of Radiation Oncology, Qilu Hospital, Cheeloo College of Medicine, Shandong University, Jinan, China; email: linzhangsdu@163.com; S. Li; Department of Medical Oncology, Qilu Hospital, Cheeloo College of Medicine, Shandong University, Jinan, China; email: songli@sdu.edu.cn	Frontiers Media S.A.	2296634X			English	Front. Cell Dev. Biol.	Article	All Open Access; Gold Open Access	Scopus	2-s2.0-85125262157
Liu P.; Chen Y.; Zhang Z.; Yuan Z.; Sun J.-G.; Xia S.; Cao X.; Chen J.; Zhang C.-J.; Chen Y.; Zhan H.; Jin Y.; Bao X.; Gu Y.; Zhang M.; Xu Y.	Liu, Pinyi (57209296569); Chen, Yan (58432861600); Zhang, Zhi (58884081500); Yuan, Zengqiang (12545498400); Sun, Jian-Guang (57192934164); Xia, Shengnan (57218226530); Cao, Xiang (57192413511); Chen, Jian (57195543229); Zhang, Cun-Jin (55801679400); Chen, Yanting (36987340700); Zhan, Hui (59102088400); Jin, Yuexinzi (57195542009); Bao, Xinyu (57197873029); Gu, Yue (57202387412); Zhang, Meijuan (5…	57209296569; 58432861600; 58884081500; 12545498400; 57192934164; 57218226530; 57192413511; 57195543229; 55801679400; 36987340700; 59102088400; 57195542009; 57197873029; 57202387412; 56005241200; 7406447353	Noncanonical contribution of microglial transcription factor NR4A1 to post-stroke recovery through TNF mRNA destabilization	2023	PLoS Biology	10.1371/journal.pbio.3002199	https://www.scopus.com/inward/record.uri?eid=2-s2.0-85165772495&doi=10.1371%2fjournal.pbio.3002199&partnerID=40&md5=2ba03cee1c55502b96173bc51a653341	Department of Neurology, Nanjing Drum Tower Hospital, Affiliated Hospital of Medical School, the State Key Laboratory of Pharmaceutical Biotechnology, Nanjing University, Nanjing, China; The Brain Science Center, Beijing Institute of Basic Medical Sciences, Beijing, China; Center of Alzheimer’s Disease, Beijing Institute for Brain Disorders, Beijing, China; Jiangsu Province Stroke Center for Diag…	Microglia-mediated: neuroinflammation is involved in various: neurological diseases, including ischemic stroke, but the endogenous mechanisms preventing unstrained inflammation is still unclear. The anti-inflammatory role of transcription factor nuclear receptor subfamily 4 group A member 1 (NR4A1) in macrophages and microglia has previously been identified. However, the endogenous mechanisms tha…		Animals; Inflammation; Ischemic Stroke; Mice; Microglia; RNA, Messenger; Stroke; Transcription Factors; 6 n methyladenosine; messenger RNA; nuclear receptor Nur77; RNA binding protein; tumor necrosis factor; messenger RNA; transcription factor; animal cell; animal experiment; animal model; Article; brain injury; controlled study; cytoplasm; disease exacerbation; gene deletion; gene expression; ge…	Li Barres BA., Microglia and macrophages in brain homeostasis and disease, Nat Rev Immunol, 18, 4, pp. 225-242, (2018); Salter MW, Stevens B., Microglia emerge as central players in brain disease, Nat Med, 23, 9, pp. 1018-1027, (2017); Bellver-Landete V, Bretheau F, Mailhot B, Vallieres N, Lessard M, Janelle ME, Et al., Microglia are an essential component of the neuroprotective scar that forms a…	Y. Xu; Department of Neurology, Nanjing Drum Tower Hospital, Affiliated Hospital of Medical School, the State Key Laboratory of Pharmaceutical Biotechnology, Nanjing University, Nanjing, China; email: xuyun20042001@aliyun.com	Public Library of Science	15449173	PBLIB	37486903	English	PloS Biol.	Article	All Open Access; Gold Open Access	Scopus	2-s2.0-85165772495
Zeng F.; Cao J.; Hong Z.; Lu Y.; Qin Z.; Tao T.	Zeng, Fanning (57641655900); Cao, Jun (57213506807); Hong, Zexuan (57203764096); Lu, Yitian (57739425200); Qin, Zaisheng (7202822893); Tao, Tao (57204324903)	57641655900; 57213506807; 57203764096; 57739425200; 7202822893; 57204324903	Epigenetic combined with transcriptomic analysis of the m6A methylome after spared nerve injury-induced neuropathic pain in mice	2023	Neural Regeneration Research	10.4103/1673-5374.371374	https://www.scopus.com/inward/record.uri?eid=2-s2.0-85160533834&doi=10.4103%2f1673-5374.371374&partnerID=40&md5=69a45a189ea3039202ea6050f1a46b51	Department of Anesthesiology, Nanfang Hospital, Southern Medical University, Guangdong Province, Guangzhou, China; Department of Anesthesiology, Central People's Hospital of Zhanjiang, Guangdong Province, Zhanjiang, China; Department of Anesthesiology, Shenzhen Maternity & Child Healthcare Hospital, Southern Medical University, Guangdong Province, Shenzhen, China	Epigenetic changes in the spinal cord play a key role in the initiation and maintenance of nerve injury-induced neuropathic pain. N6-methyladenosine (m6A) is one of the most abundant internal RNA modifications and plays an essential function in gene regulation in many diseases. However, the global m6A modification status of mRNA in the spinal cord at different stages after neuropathic pain is unk…	epigenetic; m6A; m6A reader; MeRIP-Seq; neuropathic pain; Nlrp1b; RNA methylation; spared nerve injury; Ythdf2	4 aminobutyric acid; 6 n methyladenosine; activating transcription factor 3; alkB homolog 5 RNA demethylase; alpha ketoglutarate dependent dioxygenase FTO; apolipoprotein B; beta actin; cytochrome P450; Cytochrome P450 family 2 subfamily f polypeptide 2; Fatty acid binding protein 1; forkhead transcription factor; glyceraldehyde 3 phosphate dehydrogenase; hydroxymethylglutaryl coenzyme A reductas…	Al Mamun A, Wu Y, Monalisa I, Jia C, Zhou K, Munir F, Xiao J, Role of pyroptosis in spinal cord injury and its therapeutic implications, J Adv Res, 28, pp. 97-109, (2021); Albik S, Tao YX, Emerging role of RNA m6A modification in chronic pain, Pain, 162, pp. 1897-1898, (2021); Bailey TL, Johnson J, Grant CE, Noble WS, The MEME Suite, Nucleic Acids Res, 43, pp. W39-W49, (2015); Baron R, Binder A, …	Z. Qin; Department of Anesthesiology, Nanfang Hospital, Southern Medical University, Guangzhou, Guangdong Province, China; email: mzkqzs@smu.edu.cn; T. Tao; Department of Anesthesiology, Central People's Hospital of Zhanjiang, Zhanjiang, Guangdong Province, China; email: taotaomzk@smu.edu.cn	Wolters Kluwer Medknow Publications	16735374			English	Neural. Regen. Res.	Article	All Open Access; Gold Open Access; Green Open Access	Scopus	2-s2.0-85160533834
Zhang M.; Shi J.; Deng H.	Zhang, Min (57896421900); Shi, Jun (57191823702); Deng, Huiping (14519114000)	57896421900; 57191823702; 14519114000	Transcriptome-wide m6A modification mediates cardiotoxicity in mice after chronic exposure to microplastics	2023	Chemosphere	10.1016/j.chemosphere.2023.137877	https://www.scopus.com/inward/record.uri?eid=2-s2.0-85146701863&doi=10.1016%2fj.chemosphere.2023.137877&partnerID=40&md5=baa58b284c7c6f73bd19ac0404eceb5d	Division of Cardiology, Hongqiao International Institute of Medicine, Tongren Hospital, Shanghai Jiao Tong University School of Medicine, 200336, China; Shanghai Institute of Pollution Control and Ecological Security, Key Laboratory of Yangtze River Water Environment Ministry of Education, College of Environmental Science and Engineering, Tongji University, Shanghai, China	The widespread presence of microplastics (MPs) has garnered attention owing to their possible adverse effects. However, the cardiotoxicity of MPs and their underlying mechanism remains unclear. N6-methyladenosine (m6A) modification contributes to post-transcriptional modulation of gene expression, but whether this modification is relevant to MP-induced cardiotoxicity is unknown. First, we detecte…	Cardiotoxicity; Methylated RNA immunoprecipitation Sequencing (MeRIP-seq); Microplastics; N6-methyladenosine (m6A); RNA sequencing (RNA-Seq)	Animals; Cardiotoxicity; Methylation; Mice; Microplastics; Plastics; Transcriptome; Alkylation; Cell adhesion; Cell signaling; Damage detection; Gene expression; Mammals; 6 n methyladenosine; cell adhesion molecule; cytokine receptor; messenger RNA; microplastic; transcriptome; plastic; Cardiotoxicity; Chronic exposure; High-throughput sequencing; Immunoprecipitations; Methylated RNA immunoprecip…	Alam M.N., Et al., Linking emerging contaminants exposure to adverse health effects: crosstalk between epigenome and environment, J. Appl. Toxicol., 41, 6, pp. 878-897, (2021); Cao Y., Et al., A critical review on the interactions of microplastics with heavy metals: mechanism and their combined effect on organisms and humans, Sci. Total Environ., 788, (2021); Chellasamy G., Et al., Remediation of…	M. Zhang; Division of Cardiology, Hongqiao International Institute of Medicine, Tongren Hospital, Shanghai Jiao Tong University School of Medicine, 200336, China; email: zm19821982@hotmail.com	Elsevier Ltd	456535	CMSHA	36649893	English	Chemosphere	Article		Scopus	2-s2.0-85146701863
Fan S.; Hu Y.	Fan, Shaowei (57554858200); Hu, Yuanhui (35292158600)	57554858200; 35292158600	Role of m6A Methylation in the Occurrence and Development of Heart Failure	2022	Frontiers in Cardiovascular Medicine	10.3389/fcvm.2022.892113	https://www.scopus.com/inward/record.uri?eid=2-s2.0-85134004363&doi=10.3389%2ffcvm.2022.892113&partnerID=40&md5=8b3cf2771f03ac529b3aa8518705bf1b	Guang’anmen Hospital, China Academy of Chinese Medical Sciences, Beijing, China	N6-methyladenosine (m6A) RNA methylation is one of the most common epigenetic modifications in RNA nucleotides. It is known that m6A methylation is involved in regulation, including gene expression, homeostasis, mRNA stability and other biological processes, affecting metabolism and a variety of biochemical regulation processes, and affecting the occurrence and development of a variety of disease…	autophagy; calcium homeostasis; cardiovascular disease; heart failure; m6A methylation	6 n methyladenosine; messenger RNA; nucleotide; autophagy (cellular); calcium homeostasis; cardiovascular disease; disability; disease course; epigenetics; gene expression; heart failure; homeostasis; human; hypoxia; inflammation; ischemia; methylation; morbidity; mortality; pathogenesis; Review; RNA methylation	Oerum S., Meynier V., Catala M., Tisne C., A comprehensive review of m6A/m6Am RNA methyltransferase structures, Nucleic Acids Res, 49, pp. 7239-7255, (2021); Wei C.M., Gershowitz A., Moss B., 5′-Terminal and internal methylated nucleotide sequences in HeLa cell mRNA, Biochemistry, 15, pp. 397-401, (1976); Wei C.M., Moss B., Nucleotide sequences at the N6-methyladenosine sites of HeLa cell messeng…	Y. Hu; Guang’anmen Hospital, China Academy of Chinese Medical Sciences, Beijing, China; email: huiyuhui55@sohu.com	Frontiers Media S.A.	2297055X			English	Front. Cardiovasc. Med.	Review	All Open Access; Gold Open Access; Green Open Access	Scopus	2-s2.0-85134004363
Wang J.-Y.; Lu A.-Q.	Wang, Jin-yan (57194288883); Lu, Ai-qing (57196259739)	57194288883; 57196259739	The biological function of m6A reader YTHDF2 and its role in human disease	2021	Cancer Cell International	10.1186/s12935-021-01807-0	https://www.scopus.com/inward/record.uri?eid=2-s2.0-85100872091&doi=10.1186%2fs12935-021-01807-0&partnerID=40&md5=97fde353f1e56eee8377faa3b5c25404	Department of orthopeadics, Zhangjiagang Hospital of Traditional Chinese Medicine, Zhangjiagang, 215600, Jiangsu, China	N6-methyladenosine (m6A) modification is a dynamic and reversible post-transcriptional modification and the most prevalent internal RNA modification in eukaryotic cells. YT521-B homology domain family 2 (YTHDF2) is a member of m6A “readers” and its role in human diseases remains unclear. Accumulating evidence suggests that YTHDF2 is greatly implicated in many aspects of human cancers and non-canc…	Biological function; Cancers; m6A; Non-cancers; signaling pathways; Up and downregulation; YTHDF2	6 n methyladenosine; messenger RNA; preribosomal RNA; regulator protein; RNA; tumor marker; unclassified drug; YT521 B homology domain family 2; apoptosis; cancer prognosis; cell adhesion; cell cycle; cell differentiation; cell invasion; cell migration; cell proliferation; cell viability; disease marker; human; infertility; inflammation; longevity; malignant neoplasm; metastasis; nonhuman; predic…	Boccaletto P., Et al., MODOMICS: a database of RNA modification pathways. 2017 update, Nucleic Acids Res, 46, D1, pp. D303-d307, (2018); Sanchez-Vasquez E., Et al., Emerging role of dynamic RNA modifications during animal development, Mech Dev, 154, pp. 24-32, (2018); Desrosiers R., Friderici K., Rottman F., Identification of methylated nucleosides in messenger RNA from Novikoff hepatoma cells, P…	A.-Q. Lu; Department of orthopeadics, Zhangjiagang Hospital of Traditional Chinese Medicine, Zhangjiagang, 215600, China; email: aiqinglu_doctor@163.com	BioMed Central Ltd	14752867	CCIAC		English	Cancer Cell Int.	Review	All Open Access; Gold Open Access; Green Open Access	Scopus	2-s2.0-85100872091
[truncated: 430 more rows]
